# Supplementary material for: Differential profiles of HDAC1 substrates and associated proteins in breast cancer cells revealed by trapping
Source: Royal Society of Chemistry journal article supplement (doi:10.1039/d0mo00047g), 2021-04-06
Supplement: d0mo00047g1.xlsx [file d0mo00047g1.xlsx]

## Sheet: S1A. Raw Data
Table S1A. 334 proteins quantified using MaxQuant from MCF10a samples
Raw values from MaxQuant label-free quantitation are shown for all 334 proteins observed in six independent LC-MS/MS trials from MCF-10a cells
Intensity values for each identified peptide are shown in columns C through Z. The top of each column indicates the sample: No protein- immunoprecipitation of untransfected cell (no HDAC1-Flag expressed bead binding control); WT- immunoprecipitated from cell lysated expressing wild type HDAC1-Flag; MUT- immunoprecitated from cell lysates expressing C151A mutant HDAC1-Flag; MUT+SAHA- SAHA was incl…
Multiple protein and gene names are listed when the peptide identified by LC-MS/MS is found in multiple isoforms of the protein.
HDAC1 levels (see top yellow highlighted row) were compared to determine if samples within each trial had similar immunoprecipitated proteins. Trial 1 showed significantly different HDAC1 levels in MT, MUT, and MUT+SAHA samples within the trial (see columns C-F in red) and was removed. The remaining five trials (Trials 2-6, columns G-Z) were used in subsequent analysis (Tables S2).
Protein names	Gene names	Trial 1- No protein	Trial 1- WT	Trial 1- MUT	Trial 1- MUT+SAHA	Trial 2- No protein	Trial 2- WT	Trial 2- MUT	Trial 2- MUT+SAHA	Trial 3- No protein	Trial 3- WT	Trial 3- MUT	Trial 3- MUT+SAHA	Trial 3- No protein	Trial 4- WT	Trial 4- MUT	Trial 4- MUT+SAHA	Trial 5- No protein	Trial 5- WT	Trial 5- MUT	Trial 5- MUT+SAHA	Trial 6- No protein	Trial 6- WT	Trial 6- MUT	Trial 6- MUT+SAHA
Histone deacetylase 1	HDAC1	133850000	4361600000	1463400000	4398400	2703900	3763400000	3519500000	2541400000	0	1650500000	1849700000	3454200000	1479300	2634800000	1335600000	1781200000	102590	1584900000	2579400000	2056500000	6019300	2216600000	2843600000	2441100000
Superoxide dismutase [Mn], mitochondrial	SOD2	0	672480	6850500	0	0	0	88950	0	0	1064700	1525800	0	0	49504000	31900000	9622100	5322200	0	21502000	19554000	0	9592400	71373000	60204000
Poly(rC)-binding protein 1;Poly(rC)-binding protein 2;Poly(rC)-binding protein 3	PCBP1;PCBP2;PCBP3	2912600	0	0	0	0	0	736490	0	0	139590	3389300	0	0	5754500	11497000	0	3897000	0	1589800	1723100	1013600	1728000	22091000	8489700
Mitochondrial import receptor subunit TOM22 homolog	TOMM22	0	0	0	0	0	0	1711200	0	0	0	1322600	1142000	0	0	0	87587	0	96490	461360	220710	0	151030	384440	219390
Calcium-binding mitochondrial carrier protein Aralar2;Calcium-binding mitochondrial carrier protein Aralar1	SLC25A13;SLC25A12	0	0	0	0	0	0	0	276100	0	0	2470900	2458600	0	0	1660900	0	0	0	4123400	3163000	0	0	4469200	2991700
Methyl-CpG-binding domain protein 2	MBD2	0	1536200	1095400	0	0	77464	611470	92228	0	6988600	112900	10043000	0	7827800	6619600	5980700	0	4266200	8685100	7262400	0	5860700	13923000	10525000
Histone-binding protein RBBP4	RBBP4	0	5325400	2552400	0	0	2517600	11419000	2766300	0	6379700	402360	11016000	0	4420600	1908600	11731000	0	11050000	28477000	18514000	0	4187900	23499000	18653000
Transcriptional repressor p66-beta	GATAD2B	0	7527100	12345000	0	0	44781000	24012000	23585000	0	2146200	30041000	40304000	0	13031000	11490000	39439000	0	24709000	50361000	33280000	0	27854000	56182000	42970000
T-complex protein 1 subunit epsilon	CCT5	2262200	74372000	157580000	247020	0	153350000	205430000	89851000	0	64427000	202680000	127080000	0	97151000	80280000	108800000	2410100	85798000	305780000	241280000	0	124300000	293890000	267360000
T-complex protein 1 subunit theta	CCT8	8776900	82517000	165250000	325050	279540	122850000	224200000	148710000	0	54357000	182700000	301380000	0	115660000	91559000	112770000	10765000	73082000	322690000	335260000	969760	126210000	304670000	275800000
T-complex protein 1 subunit alpha	TCP1	34490000	63721000	86353000	453410	0	58563000	99663000	45563000	18839000	29526000	155590000	194840000	39018000	66109000	78983000	164280000	30163000	87558000	207390000	224060000	34531000	103310000	287740000	202460000
Heat shock cognate 71 kDa protein	HSPA8	57835000	37646000	120600000	308670	17868000	26528000	73285000	51359000	26153000	107070000	226200000	198290000	60845000	292820000	444210000	584780000	118990000	159170000	771730000	671690000	51747000	170570000	1114200000	1086800000
T-complex protein 1 subunit beta	CCT2	877210	42433000	9463800	88306	0	45233000	78334000	52979000	0	42519000	170310000	159710000	0	57022000	89043000	129710000	4108000	68663000	231610000	232370000	564580	63872000	320120000	273140000
60S ribosomal protein L29	RPL29	1201100	1851600	6116900	0	7141900	3971700	4010500	0	15400000	0	14604000	0	0	0	6491500	14923000	0	0	5505200	3440700	0	2727800	15228000	10824000
Protein S100-A6	S100A6	0	7145900	34872000	0	34045000	12423000	9221900	0	18316000	6932900	17247000	8968900	3907300	15991000	29782000	5568400	4578800	143430	403680	17162000	7515100	7622500	20846000	3807900
Chromodomain-helicase-DNA-binding protein 4;Chromodomain-helicase-DNA-binding protein 5	CHD4;CHD5	0	4086800	1673500	0	0	1393600	3423500	1051600	0	489500	1779000	0	0	0	0	0	0	0	0	702030	0	0	0	0
Keratin, type I cytoskeletal 18	KRT18	3068700	6372300	2794300	0	0	0	9684300	2142400	11454000	10190000	6145800	12384000	0	1768800	2015600	0	175120	0	5884600	5986100	482320	3485400	1698700	5718500
RuvB-like 1	RUVBL1	0	0	2117400	0	0	1179000	0	2977000	0	1659100	3316900	1427500	3046400	3197500	3160800	927400	3198200	1465500	4274500	2369000	2562600	253960	4800500	4370100
Transcriptional repressor p66-alpha	GATAD2A	0	3506300	4371600	0	0	3886000	2263800	3044900	0	0	2772400	2824100	0	0	0	0	0	156000	338370	131600	0	159940	0	0
ELM2 and SANT domain-containing protein 1	ELMSAN1	0	0	4855000	0	0	0	0	3230200	0	0	4786600	2830800	0	2547000	0	0	0	1450600	1516000	1602000	0	635700	5032500	2075500
Small nuclear ribonucleoprotein Sm D2	SNRPD2	0	4849400	3856100	0	2520000	4640400	3620000	4296800	0	4733100	5873600	3919700	9458300	29733000	30092000	6737600	5766600	15487000	14747000	6423200	4309200	7585800	37114000	6747100
Dermcidin;Survival-promoting peptide;DCD-1	DCD	6657200	18526000	11767000	0	0	0	13844000	4994000	17599000	13413000	8668000	7694200	0	0	315410	0	0	2131900	3889900	0	2538500	0	0	8527300
Paired amphipathic helix protein Sin3a	SIN3A	0	1965900	11558000	0	0	8093500	10338000	7008800	0	0	3523100	5471000	0	610280	0	0	0	4320300	0	0	0	1714300	0	452310
T-complex protein 1 subunit delta	CCT4	3329400	50702000	40751000	0	0	26204000	97202000	63762000	0	45407000	126760000	235140000	4421800	55249000	76465000	116380000	3975000	55890000	230160000	198150000	0	109700000	241290000	252340000
Metastasis-associated protein MTA2	MTA2	1250200	84809000	99005000	0	0	119440000	137220000	64924000	20506000	28361000	99528000	90247000	4829900	59412000	28444000	43728000	1363200	56883000	128480000	116030000	0	78692000	114980000	115950000
T-complex protein 1 subunit eta	CCT7	5273200	32194000	55666000	0	321560	63446000	98483000	72414000	0	26359000	175730000	134090000	1048000	96053000	125810000	141850000	11950000	63688000	201250000	183860000	9883000	94351000	289730000	254340000
TGF-beta-activated kinase 1 and MAP3K7-binding protein 3	TAB3	2823700	0	0	0	0	0	0	0	0	945980	1351700	1905100	0	0	0	0	0	0	0	0	0	0	199020	0
40S ribosomal protein S5;40S ribosomal protein S5, N-terminally processed	RPS5	0	0	0	0	0	0	0	0	0	0	0	0	0	2065300	973520	0	0	0	1530300	0	0	0	2114200	0
60S ribosomal protein L14	RPL14	1396400	0	0	0	44107	0	0	0	0	0	0	0	0	0	1764500	0	0	0	0	0	0	0	2361900	0
Probable ATP-dependent RNA helicase DDX41	DDX41	1710900	0	0	0	0	0	0	0	0	0	2977200	0	0	0	0	0	0	1740200	0	0	0	0	2410000	0
Nicotinamide phosphoribosyltransferase	NAMPT	0	0	0	0	0	0	0	0	0	300500	0	0	0	2521100	2496100	0	0	0	0	0	0	0	2550100	0
Small nuclear ribonucleoprotein F	SNRPF	0	0	0	0	0	0	0	0	0	0	0	0	0	0	490840	0	278400	160680	398240	460160	0	319850	1155000	359540
Annexin A4	ANXA4	0	0	0	0	1833900	0	0	0	0	0	0	0	0	827170	1068300	0	0	0	573630	573900	0	328250	2664300	1570300
Very-long-chain enoyl-CoA reductase	TECR	1165000	0	83561	0	0	0	0	0	380550	0	0	0	0	1420400	1319700	0	1385200	1057200	2652600	2270000	1112100	1322600	2474400	2094900
Chloride intracellular channel protein 1	CLIC1	1220900	0	1969400	0	0	0	0	0	0	0	1437400	1006500	0	8173000	5029000	1816600	2519500	0	1644200	1350700	1241600	848750	3515700	3229000
Y-box-binding protein 3	YBX3	0	0	0	0	0	0	0	0	0	0	0	0	0	0	0	0	0	0	1397300	0	0	0	4725900	3555300
Nucleolin	NCL	0	0	0	0	0	27718	0	0	0	0	0	0	0	0	1996400	0	0	0	0	0	0	0	5287100	3768300
Tubulin alpha-1C chain;Tubulin alpha-8 chain	TUBA1C;TUBA8	0	0	0	0	0	0	0	0	0	79457	843080	0	0	3715100	0	4800600	3220800	0	7928700	4875700	0	0	11713000	6944100
60S acidic ribosomal protein P2	RPLP2	0	0	0	0	62806	0	0	0	0	0	447010	0	3081200	13425000	8774400	6920000	10396000	4080300	6339500	13432000	7568800	4530700	19435000	20667000
Protein disulfide-isomerase	P4HB	6176000	0	0	0	242410	0	0	0	0	336960	0	1943900	1794800	18812000	11636000	0	11364000	0	4389100	5617100	2797900	3365400	35711000	26255000
60S ribosomal protein L10a	RPL10A	1800200	0	0	0	0	0	37597	0	0	578570	1815000	1976600	1588800	5223600	982480	0	1479700	961310	1567800	3710600	0	1190400	0	5550100
Calmodulin-regulated spectrin-associated protein 3	CAMSAP3	0	0	0	0	0	0	52161	0	0	0	0	0	0	4671600	3354900	3898200	2679700	2380700	2939700	2221300	2730500	1556900	4233900	4067900
Small nuclear ribonucleoprotein Sm D3	SNRPD3	3599300	2039800	501200	0	0	0	80746	0	3016300	14243000	0	0	10500000	23577000	14570000	12236000	6333800	12265000	10998000	11709000	11858000	10531000	10768000	10964000
40S ribosomal protein S23	RPS23	5945500	0	0	0	0	0	126600	0	1590800	0	441060	0	2442800	5568700	3938700	2588900	1876900	1837200	3390700	5381500	3119900	2044100	4604500	5383400
DnaJ homolog subfamily A member 3, mitochondrial	DNAJA3	0	0	0	0	0	0	611850	0	0	0	0	1627000	0	393820	0	0	0	0	737810	0	0	0	0	1195800
40S ribosomal protein S15a	RPS15A	1810400	0	32186	0	0	0	691830	0	620630	1397800	1407100	0	0	3227800	2394200	1089100	1524300	0	3413600	3610100	1601000	894510	4222000	3260000
Protein S100-A8;Protein S100-A8, N-terminally processed	S100A8	11540000	10618000	6357200	0	0	0	1064200	0	0	216430000	6378800	8738300	0	122630000	90336000	20481000	5529000	8323500	38521000	60969000	44391000	20104000	78814000	70814000
Sulfide:quinone oxidoreductase, mitochondrial	SQRDL	1028900	0	219740	0	0	106370	2090100	0	0	5670900	7739500	59286	0	15119000	6952900	11181000	3451600	3070400	12130000	9628500	0	5828700	18687000	21810000
Ig kappa chain V-IV region Len;Ig kappa chain V-IV region;Ig kappa chain V-IV region JI;Ig kappa chain V-IV region B17;Ig kappa chain V-IV region STH	IGKV4-1	70072000	7606500	0	0	45304	69919	2908900	0	3296500	0	30180000	1312300	25660000	27944000	21079000	21178000	10004000	13492000	16091000	17117000	18770000	19466000	23235000	20903000
Protein disulfide-isomerase A3	PDIA3	5686000	0	0	0	9397800	0	6595100	0	0	0	2420600	0	942800	19105000	33622000	0	13916000	1914000	12095000	14782000	4614300	7577400	59647000	58250000
60S ribosomal protein L23	RPL23	14458000	3066000	10670000	0	4876000	0	8136000	0	0	2623100	7599300	0	6948200	11051000	15224000	6360400	14036000	11976000	28016000	13591000	24115000	15305000	16249000	21453000
Small nuclear ribonucleoprotein-associated protein N;Small nuclear ribonucleoprotein-associated proteins B and B	SNRPN;SNRPB	4273600	0	0	0	0	0	232120	53607	0	0	0	59317	0	13194000	12454000	11128000	7145200	6797100	11853000	11278000	3105600	7722300	10931000	11529000
Unconventional myosin-Ib	MYO1B	2958800	14259000	1774400	0	0	78774	4040700	132760	601440	6730900	9422300	11255000	0	56703000	1606100	50369000	64577000	57550000	51925000	10817000	66163000	72891000	10048000	34844000
60S ribosomal protein L3	RPL3	1603200	0	0	0	0	1014300	979270	1391200	0	0	1868200	750780	2499900	4659700	2853400	0	1432100	1636900	2870600	3220300	2092400	1856000	9310500	6759400
Sin3 histone deacetylase corepressor complex component SDS3	SUDS3	0	0	0	0	0	0	2685800	1500300	0	0	4763600	1946500	0	0	0	1151900	0	1510000	5998100	5662700	0	1804700	4396300	3775600
60S ribosomal protein L11	RPL11	4884300	0	1324700	0	0	0	0	1875900	0	10049000	3177400	4204900	0	5264200	4451100	2866100	2327100	2250200	4765200	4868700	2620100	3413700	7128100	6011400
Basigin	BSG	2502100	0	0	0	0	0	0	1883700	0	0	3297900	2135800	2124900	9085100	2316300	2558700	5851500	772800	3105800	2167500	1164600	1256200	9815200	5637500
14-3-3 protein zeta/delta	YWHAZ	5325500	1130200	59687000	0	21015000	2548100	4988200	2060800	0	79494000	20912000	12311000	5020000	62953000	96107000	0	19976000	728780	25430000	21692000	11849000	19521000	178620000	82420000
Deoxynucleoside triphosphate triphosphohydrolase SAMHD1	SAMHD1	0	0	0	0	0	0	0	2555500	0	0	0	2394200	0	0	3993900	0	0	0	2586800	3108300	0	0	6773400	5725400
Elongation factor Tu, mitochondrial	TUFM	2525100	0	0	0	0	3409100	6511800	3086400	0	1140300	9787600	5589400	16393000	12594000	7633800	4562400	8086900	9744000	13375000	11399000	19503000	8418000	17652000	14287000
Emerin	EMD	31274	0	5275100	0	0	0	5189100	3300300	0	0	0	6501700	0	0	0	0	0	0	1298100	575130	0	0	0	550590
Heterogeneous nuclear ribonucleoprotein F;Heterogeneous nuclear ribonucleoprotein F, N-terminally processed	HNRNPF	1440400	0	3157000	0	0	2316900	3086300	3441400	0	2834500	4054200	4244000	0	0	642750	0	691740	568240	1125700	591240	511740	440450	2007300	1185900
Histone H4	HIST1H4A	26975000	52227000	0	0	0	0	6607000	3599000	155600000	42767000	17530000	19492000	0	35956000	14382000	16555000	1346300	3672900	71298000	109590000	21658000	33981000	128070000	38543000
Plasminogen;Plasmin heavy chain A;Activation peptide;Angiostatin;Plasmin heavy chain A, short form;Plasmin light chain B	PLG	6367600	1683300	10075000	0	2981500	0	0	4439900	5670000	5850900	8236700	15026000	4867100	11848000	9616500	7566400	11070000	14384000	12214000	10731000	16262000	12947000	21392000	18091000
Tubulin beta-2B chain;Tubulin beta-2A chain	TUBB2B;TUBB2A	0	0	0	0	0	0	2160700	4823800	0	0	6115600	3968400	0	0	0	0	2509200	2784200	4683300	5210800	3207700	3270400	5921700	2907100
Monocarboxylate transporter 4	SLC16A3	3151400	2549700	10116000	0	1286600	1985000	10271000	7687100	0	2576400	6682000	1755900	0	0	402780	0	1386900	1171300	1487100	848610	1334100	1171400	2928000	1545500
Tricarboxylate transport protein, mitochondrial	SLC25A1	3373400	2407800	8982400	0	0	26269	11780000	11806000	0	2831800	11633000	9478000	944520	4757500	8537000	7538100	0	4326700	11090000	19121000	1537800	2980500	18526000	15952000
Histone-binding protein RBBP7	RBBP7	2518700	16960000	575130	0	0	3509900	6499900	12494000	0	6957600	1856300	4740500	0	14340000	11609000	13499000	0	2556100	42918000	16202000	37890	11301000	55285000	58591000
Ubiquitin-60S ribosomal protein L40;Ubiquitin;60S ribosomal protein L40;Ubiquitin-40S ribosomal protein S27a;Ubiquitin;40S ribosomal protein S27a;Polyubiquitin-B;Ubiquitin;Polyubiquitin-C;Ubiquitin	UBA52;RPS27A;UBB;UBC	30794000	30705000	31344000	0	16262000	16741000	22837000	47651000	20479000	31737000	71286000	112380000	11320000	37214000	28035000	35835000	19825000	14028000	52503000	69252000	29164000	26517000	115340000	93502000
		33360000	26242000	90145000	326850	3631900	9695600	55128000	57601000	10470000	45812000	189740000	88161000	15849000	172940000	537680000	680230000	26672000	73345000	606530000	560440000	13244000	119340000	667990000	744820000
Heat shock 70 kDa protein 6;Putative heat shock 70 kDa protein 7	HSPA6;HSPA7	35582000	27758000	75267000	0	30734000	21789000	56873000	65314000	0	25928000	28762000	65607000	26603000	146130000	179240000	57380000	40497000	102830000	373430000	316170000	48355000	100170000	773450000	571000000
ADP/ATP translocase 2;ADP/ATP translocase 2, N-terminally processed	SLC25A5	44230000	10562000	120790000	0	20355000	31568000	112600000	75447000	15953000	28410000	217480000	71311000	102550000	102430000	141430000	217590000	33476000	83939000	234200000	190360000	85688000	57963000	164310000	185540000
Protein arginine N-methyltransferase 5;Protein arginine N-methyltransferase 5, N-terminally processed	PRMT5	1483700000	777020000	885370000	3442500	647070000	700510000	553400000	588770000	1206200000	965840000	832820000	1315500000	3477700000	4309600000	3386900000	3332500000	2474900000	2605100000	2866400000	2852700000	1926000000	2778000000	4602900000	3325200000
Phosphoglycerate mutase 1;Probable phosphoglycerate mutase 4	PGAM1;PGAM4	0	0	1149700	0	0	0	0	0	0	0	0	0	0	0	2736500	0	960650	0	519290	0	343380	0	2300300	1688400
Peptidyl-prolyl cis-trans isomerase B	PPIB	0	0	2871500	0	2336800	0	0	0	0	0	23173	0	0	3426500	1565600	0	1424300	0	0	1046200	0	0	2757500	2888600
Interferon-induced protein with tetratricopeptide repeats 3	IFIT3	0	0	25342	0	0	0	0	0	0	438580	0	0	0	5517600	0	0	0	0	6167700	653110	0	0	4898600	8487500
Protein SET;Protein SETSIP	SET;SETSIP	0	0	1697000	0	919450	0	0	0	0	0	0	0	0	0	5101000	0	3437400	0	2962500	0	0	0	8231200	14247000
DnaJ homolog subfamily C member 10	DNAJC10	0	0	1124400	0	2957000	0	956510	0	0	0	782870	0	0	145520	0	2706100	0	6159600	5842600	4197700	3158100	6219100	4523500	5172700
Metastasis-associated protein MTA3	MTA3	0	3532400	3819900	0	3809000	3750700	0	2785300	0	0	1129500	3743400	0	0	0	0	0	1387900	2720100	2646100	0	1964800	3033600	2073900
REST corepressor 1	RCOR1	0	8125100	7518400	0	0	4776700	3988900	4239600	0	2781800	4801100	2999200	0	3366400	1260300	1488600	0	1954600	4011200	3440700	0	3808200	3911500	4459600
Mitochondrial 2-oxoglutarate/malate carrier protein	SLC25A11	2014500	2876500	9028400	0	0	0	11400000	8999000	582370	0	0	10515000	5049700	20574000	19604000	7706600	3286200	6047900	13221000	11733000	9400200	3649700	18367000	13607000
T-complex protein 1 subunit gamma	CCT3	4192100	50015000	67985000	0	0	40025000	60520000	85022000	0	38284000	90517000	80447000	3043900	58618000	72088000	121880000	5562000	47926000	161490000	144970000	382700	66810000	187460000	161620000
TGF-beta-activated kinase 1 and MAP3K7-binding protein 1	TAB1	2848000	0	0	0	39102	0	0	0	0	0	121250	0	0	0	0	0	0	0	0	0	0	0	0	0
Protein POF1B	POF1B	0	0	0	0	0	0	0	0	0	4835500	0	0	0	316490	0	0	0	0	468580	0	0	0	0	0
Tetratricopeptide repeat protein 39B	TTC39B	0	0	0	0	0	0	0	0	0	0	0	0	0	1843500	0	0	0	0	1879800	0	0	2201000	0	0
Calmodulin-like protein 5	CALML5	0	0	0	0	0	0	0	0	0	0	705990	0	0	0	0	0	0	0	0	6738600	12829000	744640	1724800	0
Complement component 1 Q subcomponent-binding protein, mitochondrial	C1QBP	2438700	0	0	0	77552	0	0	0	841200	0	0	0	0	2822600	0	0	2088400	0	2334100	0	0	0	2241700	0
Calpain small subunit 1	CAPNS1	0	0	0	0	0	0	0	0	0	0	0	0	0	1938400	273040	0	2476100	0	0	0	0	0	2288200	0
Macrophage-capping protein	CAPG	1045900	0	0	0	2860900	0	0	0	0	1031400	0	0	0	0	0	0	100220	0	0	0	0	0	12711000	0
Neuroplastin	NPTN	0	0	0	0	0	0	0	0	0	0	0	0	0	0	237270	0	146610	107140	0	0	91726	0	265570	201640
Ribosome-binding protein 1	RRBP1	0	0	0	0	0	0	0	0	0	0	0	0	0	0	0	0	483360	0	163190	0	0	0	754100	536770
3-hydroxyacyl-CoA dehydrogenase type-2	HSD17B10	425020	0	0	0	0	0	0	0	0	2517500	0	788360	815980	1780300	624830	0	1618600	181680	653420	301220	324150	387020	1585100	608000
40S ribosomal protein S7	RPS7	509920	0	0	0	0	128210	0	0	0	0	402810	0	1941700	1052400	829510	0	545220	708730	500820	604800	735350	449990	1422200	736930
Protein S100-P	S100P	0	0	0	0	0	0	0	0	0	0	0	0	0	274340	0	0	0	128740	1125200	413510	79138	366860	0	750200
60S ribosomal protein L28	RPL28	0	0	0	0	0	0	0	0	0	2203700	0	1555700	3675100	337680	0	0	0	737170	0	0	0	0	1101400	814480
Splicing factor, proline- and glutamine-rich;Non-POU domain-containing octamer-binding protein	SFPQ;NONO	0	0	0	0	2294600	0	0	0	0	0	0	0	0	0	0	0	1248800	0	0	0	0	0	2489800	822850
Cytochrome c oxidase subunit 4 isoform 1, mitochondrial	COX4I1	0	0	0	0	0	0	0	0	0	1087500	0	0	0	0	0	0	0	0	1073400	0	0	0	593940	943280
Cytoskeleton-associated protein 4	CKAP4	0	0	0	0	0	0	0	0	0	884090	0	0	0	749220	0	0	498520	0	296880	327820	153270	172990	1501500	1203300
ATPase family AAA domain-containing protein 3C;ATPase family AAA domain-containing protein 3A;ATPase family AAA domain-containing protein 3B	ATAD3C;ATAD3A;ATAD3B	0	0	0	0	0	0	0	0	0	0	1318400	2240100	0	0	0	0	551830	0	1906100	1083500	0	0	0	1325900
7-dehydrocholesterol reductase	DHCR7	0	0	0	0	0	0	0	0	0	0	0	0	0	1852300	1786400	0	0	0	0	0	1041000	0	1706900	1772400
60S ribosomal protein L24	RPL24	1686200	0	0	0	623960	0	0	0	0	0	0	0	2331400	2514900	2547200	1329100	1786700	0	0	4218500	1785100	1183700	4154900	1868400
Ras-related protein Rab-5C	RAB5C	0	0	0	0	0	0	0	0	0	0	0	0	0	4562700	0	0	1137800	0	484660	574660	0	0	2693200	2127700
Cytochrome b-c1 complex subunit 2, mitochondrial	UQCRC2	0	0	0	0	0	0	0	0	0	0	1788900	1747000	0	3491900	857440	2012200	1197600	779510	1412100	869460	648740	939000	2066300	2212500
Interferon regulatory factor 6	IRF6	841170	0	0	0	0	0	0	0	0	0	0	0	5548100	7193400	4576700	3340000	7091900	5139100	4736100	3416100	6984300	952430	11023000	2600400
Peroxiredoxin-5, mitochondrial	PRDX5	0	0	0	0	38350	0	0	0	0	0	0	0	0	1639300	0	0	0	0	0	0	0	0	3420400	2914100
F-actin-capping protein subunit alpha-1	CAPZA1	0	0	0	0	127670	0	0	0	0	55095	356090	0	0	3400800	0	0	0	2776100	8586100	14894000	7406000	7559400	0	3121100
GTP-binding nuclear protein Ran	RAN	0	0	0	0	0	0	0	0	0	0	0	0	0	3731700	2633800	0	0	0	0	0	0	0	2542200	3638800
Annexin A3	ANXA3	0	0	0	0	0	0	0	0	0	1882100	0	0	0	0	0	0	0	0	457740	0	0	0	2656500	4539300
Glutathione S-transferase omega-1	GSTO1	2215900	0	0	0	0	0	0	0	0	339140	0	0	3796300	6567000	5503400	0	3080800	2924600	3184700	1261800	4750800	3437200	2934400	6094800
Inosine-5-monophosphate dehydrogenase 2	IMPDH2	1909200	0	2366500	0	101150	0	0	0	0	583790	304620	0	2651800	3432100	2890300	0	2953100	236660	1028200	270880	1503500	1677600	4576100	6253800
Nascent polypeptide-associated complex subunit alpha;Nascent polypeptide-associated complex subunit alpha, muscle-specific form	NACA	0	0	0	0	0	0	0	0	0	0	0	0	0	3422200	3991700	0	2487400	0	0	0	0	0	4284000	6335900
Thioredoxin	TXN	0	0	0	0	0	0	0	0	0	12237000	1501600	0	0	7066100	0	9414200	4211100	2570600	0	15002000	3248000	16447000	27411000	6648000
Ras GTPase-activating protein-binding protein 1	G3BP1	2201900	0	0	0	0	0	0	0	0	0	0	0	0	7451100	2115700	0	1703600	718260	3815900	3151900	1297600	2674000	8032700	6658400
Galectin-3-binding protein	LGALS3BP	0	0	0	0	0	0	0	0	0	0	0	1212700	0	0	2525400	0	643260	0	2294800	0	0	814430	1845700	6661000
60S ribosomal protein L13	RPL13	1941900	0	39510	0	0	1056600	0	0	0	4168800	1938500	1993600	2213900	5359900	3824100	0	2750700	0	5263000	6718400	2683400	1542400	8998300	7145000
Macrophage migration inhibitory factor	MIF	0	0	0	0	0	0	0	0	0	0	0	0	0	7085500	5975800	2858500	4105900	0	2583300	3057000	1579000	1704300	7039600	7359400
ATP synthase subunit delta, mitochondrial	ATP5D	838710	0	0	0	0	0	0	0	0	601200	1751100	2369300	0	9961400	2219400	0	2158400	1393700	3242200	3243700	953780	1033900	2964100	7505300
Nuclease-sensitive element-binding protein 1	YBX1	2745500	0	0	0	0	0	0	0	0	0	0	0	1573100	7351600	5289300	522140	7088700	1166500	6707000	6822800	988310	916410	24417000	8836400
14-3-3 protein gamma;14-3-3 protein gamma, N-terminally processed	YWHAG	0	0	0	0	3311300	0	0	0	0	0	0	0	0	0	1091000	0	666830	0	0	0	0	0	2317000	8942600
40S ribosomal protein S16	RPS16	11887000	0	128200	0	742660	323060	0	0	0	3629800	2758500	134760	1733800	12412000	7489000	2081400	2332100	1692200	8933400	8745900	2889200	6155400	12772000	9340500
Histone H2B type 1-L;Histone H2B type 1-M;Histone H2B type 1-N;Histone H2B type 1-H;Histone H2B type 3-B;Histone H2B type 2-F;Histone H2B type 2-E;Histone H2B type 1-C/E/F/G/I;Histone H2B type 1-D;Histone H2B type F-S;Histone H2B type 1-B;Histone H2B type 1-O;Histone H2B type 1-J;Histone H2B type 1-K;Histone H2B type 1-A	HIST1H2BL;HIST1H2BM;HIST1H2BN;HIST1H2BH;HIST3H2BB;HIST2H2BF;HIST2H2BE;HIST1H2BC;HIST1H2BD;H2BFS;HIST1H2BB;HIST1H2BO;HIST1H2BJ;HIST1H2BK;HIST1H2BA	27872000	31223000	0	0	83008	0	0	0	43537000	27784000	17276000	21601000	2307700	21690000	0	6889000	3986000	2988700	25180000	27842000	22303000	24618000	52428000	10353000
Tubulin beta-8 chain	TUBB8	0	0	0	0	0	0	0	0	0	0	0	0	0	8340100	7040100	6771800	5353200	0	12511000	9350900	6029600	4158800	13880000	12882000
Fascin	FSCN1	2085900	0	53524	0	0	0	0	0	0	0	0	0	539040	4895900	3070500	936150	1559200	0	1579700	2290200	1222200	1439800	3876000	13478000
14-3-3 protein beta/alpha;14-3-3 protein beta/alpha, N-terminally processed	YWHAB	0	0	0	0	0	0	0	0	0	14963000	2728700	5858100	1180200	1919900	3117900	909910	9516800	1657500	6474800	3575600	903680	6645000	10408000	13905000
L-lactate dehydrogenase B chain	LDHB	8078400	0	9558600	0	367750	0	0	0	368860	2108300	2963700	2624100	7428800	19581000	2222900	3088600	12141000	390980	6186900	4917400	4113900	5369400	13137000	19081000
Elongation factor 2	EEF2	9281800	0	46438	0	1412100	0	0	0	979740	6408900	1540000	0	0	1687300	1135100	0	13012000	0	4201100	2443300	4387800	1437800	21387000	19483000
Malate dehydrogenase, mitochondrial	MDH2	3070000	0	0	0	0	0	0	0	0	0	84380	0	0	11143000	4766300	2103900	6796400	393170	5371000	3919300	2669600	3575200	11049000	20916000
Tropomyosin alpha-3 chain	TPM3	0	0	0	0	0	0	0	0	0	0	703900	0	4784400	17193000	2237600	3070000	10103000	9828500	11171000	51198000	10845000	11701000	16935000	22460000
Endoplasmin	HSP90B1	1787300	0	3587900	0	2472300	0	0	0	0	3952300	2347800	0	0	0	3597000	0	3417600	0	0	1712200	0	2679200	22683000	23782000
Triosephosphate isomerase	TPI1	5519600	0	12208000	0	10636000	0	0	0	3855100	8823000	1664300	622470	476880	26055000	17600000	5528300	16619000	1253700	8227100	4613800	2844300	6166300	11669000	28291000
Calmodulin	CALM1	3188500	0	0	0	0	0	0	0	0	692650	555970	2904400	0	20689000	14659000	13337000	9361000	9503000	16579000	34719000	21281000	15803000	37639000	30902000
Tryptophan--tRNA ligase, cytoplasmic;T1-TrpRS;T2-TrpRS	WARS	1073500	0	311650	0	46095	0	0	0	0	97912	2120200	1446300	0	39692000	19452000	15807000	4402300	9788600	18837000	15866000	3467800	14197000	35315000	44415000
Small nuclear ribonucleoprotein Sm D1	SNRPD1	8039500	2194700	3124900	0	397520	0	0	0	5755700	10349000	3768700	5262600	20829000	55897000	47888000	29812000	4724100	29001000	30036000	42279000	18046000	28147000	40881000	46142000
Cofilin-1	CFL1	78349000	15626000	1166300	0	2324100	0	0	0	30005000	9357500	38184000	609460	0	153260000	305820000	153000000	10612000	68758000	4337000	162470000	153260000	152670000	14544000	103130000
Glutathione S-transferase P	GSTP1	14079000	1520400	0	0	3524400	0	0	0	1805000	3110200	4452800	175600	52355000	138070000	58061000	50553000	57184000	19751000	41662000	46034000	37004000	35515000	87673000	110930000
Annexin A5	ANXA5	5758600	0	88260	0	2328900	0	19892	0	0	0	73723	0	1362200	19355000	11031000	2883700	15019000	0	4837100	7848500	1871100	3420900	31706000	37265000
Phosphoglycerate kinase 1	PGK1	14943000	0	6833400	0	4660100	1466000	49426	0	78524	14844000	1928200	1216600	5203100	25751000	15716000	4110200	19933000	155400	5485500	8866100	4455200	1264100	33249000	35550000
Protein-glutamine gamma-glutamyltransferase E;Protein-glutamine gamma-glutamyltransferase E 50 kDa catalytic chain;Protein-glutamine gamma-glutamyltransferase E 27 kDa non-catalytic chain	TGM3	1753500	0	0	0	0	0	65401	0	0	0	0	0	0	1992700	0	0	0	0	0	0	0	0	0	0
RNA-binding protein FUS;TATA-binding protein-associated factor 2N	FUS;TAF15	4739100	3405800	9130400	0	5892900	5155200	70973	0	4017100	0	0	320520	656810	2450500	2951200	539780	924940	3009800	0	2334200	0	1385300	3212600	9000100
Heat shock protein beta-1	HSPB1	8995900	0	223150	0	0	0	75431	0	1199200	3806400	4173400	141470	1736300	19497000	7113100	6675200	6871800	1723100	14544000	11293000	8962700	5354300	24019000	19457000
Heat shock protein HSP 90-beta	HSP90AB1	6180500	0	111000	0	0	0	78488	0	0	7173700	3227500	78317	0	7911700	2208300	1200400	7562500	827810	7058600	8265800	0	3929400	19369000	18530000
ATP synthase subunit O, mitochondrial	ATP5O	1641700	0	0	0	0	0	88647	0	0	2684600	1244600	0	0	6380600	2340400	1802000	1310800	0	2167200	2680200	1838700	0	2945200	4009600
40S ribosomal protein S25	RPS25	1871500	0	0	0	0	0	317660	0	0	2132400	0	0	0	6235000	2888800	0	1902300	0	0	0	794360	1256200	4106200	3850600
60S ribosomal protein L22	RPL22	719710	0	0	0	903950	1438200	700450	0	0	5271900	0	0	0	15456000	25128000	0	0	0	0	0	0	0	0	0
Galectin-1	LGALS1	17048000	1843700	251330	0	1745900	403630	1147700	0	0	1990500	2433900	0	29286000	35731000	29714000	20836000	15471000	11165000	16342000	17302000	29816000	14450000	31793000	24993000
60S ribosomal protein L8	RPL8	2011600	0	3905200	0	0	0	1516500	0	0	0	0	0	0	0	0	0	610410	710230	0	0	497610	0	0	0
Heterogeneous nuclear ribonucleoprotein M	HNRNPM	1392900	1339600	0	0	0	0	1635100	0	0	1537200	0	0	0	0	0	1748700	0	0	7915100	16820000	0	5577800	10653000	11179000
Major vault protein	MVP	1785000	2394700	0	0	62807	1310100	2054500	0	3139000	0	0	0	0	0	0	0	0	0	0	0	0	0	0	0
Heat shock protein HSP 90-alpha	HSP90AA1	25209000	382480	12918000	216650	10214000	3419700	2563100	0	11238000	42504000	16740000	7300500	8498800	45998000	39746000	19663000	65181000	7252800	33284000	32734000	10762000	25875000	92379000	127580000
40S ribosomal protein S4, X isoform;40S ribosomal protein S4, Y isoform 1	RPS4X;RPS4Y1	11545000	1753600	4380900	0	201490	806210	2872900	0	1606800	12338000	5617000	12454000	1482900	36775000	13544000	3418700	10442000	6975900	15033000	16026000	7873300	8717900	19336000	35611000
Nucleoside diphosphate kinase B;Nucleoside diphosphate kinase A;Putative nucleoside diphosphate kinase	NME2;NME1;NME2P1	5239300	0	0	0	0	0	5989700	0	0	0	0	3203500	0	38560000	13124000	2871200	14821000	1361600	10543000	8874800	6881200	5325100	23061000	20309000
Homer protein homolog 1	HOMER1	0	0	0	0	0	0	11472000	0	0	0	0	0	28802000	5464600	5004700	0	0	0	0	0	12700000	15345000	1650700	0
Carbonyl reductase [NADPH] 1	CBR1	18591000	0	0	0	872160	2336700	845900	43819	6135400	5686200	3392500	3468000	27979000	33781000	47594000	26612000	28283000	28335000	30281000	26286000	42080000	26736000	38747000	36769000
Protein odr-4 homolog	ODR4	0	0	0	0	0	0	45505	64481	0	0	0	0	0	2687900	4780200	2446400	4670000	2428100	3140600	3259300	3663500	2608600	3021700	3640300
14-3-3 protein sigma	SFN	6573300	0	8090500	0	5042100	0	2926400	64880	12067000	146290000	905190	2453100	3027900	60855000	51430000	9784900	53134000	7335500	9392700	32588000	12971000	14839000	39234000	102860000
ATP synthase subunit gamma, mitochondrial	ATP5C1	4353700	0	274170	0	454940	0	1120900	99175	0	4198300	3647600	1288900	2501700	4490100	5797600	596010	3463400	2466300	10073000	7688300	3436300	1393700	9910800	6349900
MOB kinase activator 2	MOB2	1778600	0	0	0	406610	0	0	100870	0	0	0	0	8580700	8754100	10536000	9336800	4585000	9102700	6146200	8924900	10775000	6567500	8462000	10196000
Tubulin alpha-4A chain	TUBA4A	0	0	0	0	0	0	833890	118890	0	8203100	0	0	3892100	3791500	4171900	3404500	4114500	2183700	4143400	5113700	3276200	2502100	4978800	6007100
Desmoglein-1	DSG1	24689000	5571800	1517900	0	0	3416500	8545300	189360	14561000	10542000	1802200	975600	0	0	637750	1821500	0	0	69642	1998200	0	0	0	0
ADP/ATP translocase 3;ADP/ATP translocase 3, N-terminally processed	SLC25A6	2446100	0	0	0	3768300	0	0	439820	37563	0	8706400	351080	4093800	11199000	13712000	13187000	5084000	2980200	22264000	19420000	11573000	10872000	17566000	18219000
Thiamine transporter 1	SLC19A2	18191000	4696700	452990	0	7477500	1722400	0	504280	21021000	6351300	13711000	0	26737000	0	43576000	16823000	0	0	17093000	11991000	16371000	27354000	28863000	2739100
Myosin regulatory light chain 12A;Myosin regulatory light polypeptide 9	MYL12A;MYL9	7758900	0	0	0	204840	0	1078900	545210	1096200	70075000	2520500	7558800	105650000	231860000	161580000	183110000	191190000	174140000	311090000	1182700000	371680000	353290000	338610000	259720000
Transmembrane protein 33	TMEM33	517370	0	0	0	0	1552200	1417700	659970	0	0	5391000	0	0	2063400	1952300	3094400	1816300	2014900	3641400	2450200	1722900	982670	2032400	1880200
Prohibitin-2	PHB2	943800	0	0	0	0	0	1755300	691290	0	1666000	0	2139700	1452200	466980	0	214930	273590	247160	490650	325330	161000	404230	294930	671010
SUN domain-containing protein 2	SUN2	3867200	0	0	0	0	0	0	1186200	0	466270	920230	1072600	13909000	1872700	1317400	1291200	3751700	2116300	1069400	1806500	2808000	1535300	0	191820
40S ribosomal protein S2	RPS2	0	0	0	0	0	62284	142840	1457800	0	2387700	911900	3187500	0	3878700	6495800	1895800	1221100	1151700	2358700	3753500	831130	0	11053000	5488700
Serine/threonine-protein kinase 38-like	STK38L	13323000	1734500	63805	0	4816000	2260600	95880	1551200	9470100	6422000	8249400	12203000	45265000	61622000	53064000	24543000	38289000	42534000	34000000	42362000	60479000	48722000	83467000	60737000
Heterogeneous nuclear ribonucleoprotein K	HNRNPK	5155900	3395800	4196700	0	5879900	2900500	79971	1638500	2862000	17117000	3175000	4937600	10665000	24593000	16745000	3507600	9249700	6790000	9056500	11887000	6684300	6408500	24901000	25303000
Junction plakoglobin	JUP	46314000	601810	1688500	0	2853300	0	349020	1817600	0	55903000	721450	0	4576800	10190000	1024200	0	0	0	5880400	788560	0	18940000	4503100	4563800
Methylosome protein 50	WDR77	589150000	170210000	5469600	87406	9509900	0	2390000	2172500	146930000	297060000	129780000	123370000	1402500000	1590700000	1280100000	1537800000	548560000	611570000	726850000	778730000	590800000	637980000	1118200000	1812000000
Lysine-specific histone demethylase 1A	KDM1A	0	8075400	1397900	83065	0	59117	358910	2487500	0	2825900	5119500	3418700	65344000	8612700	2403600	4183700	24356000	17324000	7765400	4165400	19993000	15563000	14072000	12417000
Histone H2A type 1-J;Histone H2A type 1-H;Histone H2A.J;Histone H2A type 1-C;Histone H2A type 3;Histone H2A type 1-D;Histone H2A type 1;Histone H2A type 1-B/E;Histone H2AX;Histone H2A type 2-B	HIST1H2AJ;HIST1H2AH;H2AFJ;HIST1H2AC;HIST3H2A;HIST1H2AD;HIST1H2AG;HIST1H2AB;H2AFX;HIST2H2AB	19651000	15659000	0	487510	982460	170820	1308400	3089900	23164000	27885000	24051000	36315000	0	12086000	6312000	12888000	0	5233000	25236000	36126000	16007000	20234000	32085000	18271000
ATP synthase subunit alpha, mitochondrial	ATP5A1	16186000	2297400	2605800	0	3362400	0	2233900	4154500	7715100	22212000	23195000	26400000	29548000	65435000	58603000	27218000	59320000	19387000	61348000	38366000	43454000	35398000	98255000	102530000
Histone H3.2;Histone H3.1t;Histone H3.3;Histone H3.1;Histone H3.3C	HIST2H3A;HIST3H3;H3F3A;HIST1H3A;H3F3C	8653700	12059000	2854800	0	285040	2154800	2255700	4432000	22053000	32245000	6867300	14022000	0	0	0	0	0	1476300	5991300	9788800	4657000	5390000	9131300	5379300
Annexin A2;Putative annexin A2-like protein	ANXA2;ANXA2P2	85087000	3939600	63877000	0	30466000	8545300	11934000	4692600	12680000	109480000	84502000	40998000	32505000	547670000	327420000	152950000	111960000	31194000	157530000	142620000	51593000	99700000	712290000	478780000
Tubulin beta chain	TUBB	27254000	17230000	43089000	32680	3939700	1952200	15563000	4850500	12160000	5118400	50094000	28088000	50750000	68007000	59623000	47575000	44022000	39043000	76197000	82740000	58873000	46516000	111090000	94353000
Apoptosis-inducing factor 1, mitochondrial	AIFM1	637970	0	3061900	0	0	0	0	5010600	0	0	1578000	4554000	0	0	0	0	3379000	0	4242400	3699700	0	688890	7898300	6584300
60 kDa heat shock protein, mitochondrial	HSPD1	16497000	1083100	28341000	162510	21501000	12703000	6195600	5133500	3631100	16142000	22213000	10287000	4963300	89418000	39520000	15428000	36049000	913920	26022000	26563000	11850000	17002000	76830000	101040000
C-Myc-binding protein	MYCBP	14471000	10468000	6104000	0	11286000	0	9580200	7116700	15646000	3371000	16821000	8213500	0	10243000	0	2232700	5751100	14869000	20702000	22799000	9092600	9746100	24486000	20356000
40S ribosomal protein S18	RPS18	31487000	8020000	23550000	0	18776000	15912000	15780000	8585200	20941000	52320000	46366000	20522000	32367000	22035000	55026000	39736000	16522000	20538000	33231000	19816000	18273000	19508000	42530000	23133000
Stress-70 protein, mitochondrial	HSPA9	30260000	3124500	12909000	0	13557000	55442	16422000	9323600	2952000	6501100	11122000	18625000	8309400	23676000	13613000	24953000	35347000	10614000	29494000	24260000	25267000	22170000	28333000	73595000
Methylosome subunit pICln	CLNS1A	14788000	7234200	5600400	0	11621000	843120	3456700	10373000	23158000	11804000	37381000	9815000	57315000	83104000	91358000	68521000	40921000	46338000	45065000	48813000	47811000	57377000	87578000	76919000
Desmoplakin	DSP	31218000	2838600	5742300	0	5269300	2165600	5593500	10403000	1009500	68523000	8890300	3553200	1171100	5261800	0	1534800	424760	583420	4883600	698470	565510	14514000	1441600	3455100
Peroxiredoxin-1	PRDX1	121180000	29426000	26382000	0	104650000	18054000	23164000	12433000	61590000	69774000	38366000	40183000	142880000	223830000	183860000	106270000	173010000	115460000	107130000	118660000	135440000	92461000	197860000	176370000
Tubulin alpha-1B chain	TUBA1B	220670000	105940000	49085000	644120	24664000	16060000	83226000	19080000	81417000	186380000	265310000	267010000	385910000	353490000	341870000	355250000	457780000	293230000	632820000	513690000	453830000	323220000	676880000	775050000
Dystrophin	DMD	227280000	35172000	29096000	0	5051000	38206000	22568000	44420000	8620500	3821800	0	46083000	0	0	18449000	0	0	0	0	0	18470000	0	42698000	0
Tubulin beta-4B chain	TUBB4B	165250000	68730000	65693000	0	54855000	32736000	131170000	62696000	36041000	138300000	174660000	136020000	309460000	339270000	295680000	310190000	271280000	206700000	412820000	418960000	371970000	222540000	490220000	459380000
T-complex protein 1 subunit zeta	CCT6A	7228300	53711000	84621000	395510	0	62310000	84766000	68542000	0	64693000	183080000	268920000	0	79911000	79638000	114910000	988580	54815000	237440000	234210000	1420700	79033000	248240000	281790000
Keratin, type II cytoskeletal 2 epidermal	KRT2	3474900000	994770000	1399500000	890670	2129000000	1690500000	2783200000	1786700000	1350300000	4160700000	1422600000	1513000000	1201800000	1689500000	726330000	343420000	372260000	845450000	2619900000	1259000000	457320000	1556300000	1249100000	3991500000
Ig kappa chain V-II region TEW;Ig kappa chain V-II region Cum;Ig kappa chain V-II region GM607;Ig kappa chain V-II region RPMI 6410		45795000000	9899500000	10569000000	48243000	6902200000	3773500000	19001000000	11680000000	24211000000	8442500000	5717200000	16380000000	41718000000	52123000000	49601000000	43788000000	37726000000	44752000000	44217000000	51125000000	49199000000	45147000000	625540000	47505000000
Protein S100-A11;Protein S100-A11, N-terminally processed	S100A11	0	0	3279100	0	0	0	0	0	0	1743300	0	0	0	0	0	0	0	0	0	0	0	0	0	0
Mitochondrial import inner membrane translocase subunit TIM50	TIMM50	0	0	1356600	0	0	0	0	0	0	0	0	2096800	709450	0	648160	0	485190	377670	664940	483920	458590	313630	1108100	725550
Laminin subunit beta-3	LAMB3	0	0	191980	0	0	0	0	0	0	922040	0	0	0	0	0	0	0	0	0	0	0	0	0	730320
Heterogeneous nuclear ribonucleoprotein D0;Heterogeneous nuclear ribonucleoprotein D-like	HNRNPD;HNRNPDL	0	0	3482100	0	0	0	0	0	0	0	0	0	0	13363000	2203400	0	0	0	0	2400600	0	0	5197800	10456000
Myosin light chain 1/3, skeletal muscle isoform;Myosin light chain 3	MYL1;MYL3	0	0	1292500	0	0	0	0	0	0	15708000	1487500	1451500	0	0	0	0	10885000	22267000	20578000	85085000	50388000	26072000	0	13940000
Ubiquitin-like protein ISG15	ISG15	0	9024000	4998300	0	0	12069000	3876900	23543000	0	16425000	14837000	15221000	0	25826000	10341000	23042000	761210	14479000	20854000	12267000	0	15082000	33929000	29211000
Cathepsin B;Cathepsin B light chain;Cathepsin B heavy chain	CTSB	9057000	11886000	35517000	0	4926300	5449900	39217000	29789000	0	14158000	13085000	14927000	10347000	14251000	5813900	3061600	6168500	14549000	20524000	26886000	29127000	2519500	23929000	32837000
Mesoderm induction early response protein 1	MIER1	0	88618000	110260000	0	142500000	138900000	177730000	32379000	321000000	96629000	16233000	99548000	45326000	0	0	0	7984800	45166000	24945000	15859000	15396000	20972000	8706600	16691000
OTU domain-containing protein 4	OTUD4	94452000	94498000	123000000	0	134640000	72389000	108680000	58119000	138700000	66243000	121940000	77893000	449270	98008	353860	1279500	340720	5817500	123530	646740	2516700	175820	4161900	11603000
Ig gamma-2 chain C region	IGHG2	122990000	144850000	135170000	0	114580000	83603000	126250000	337140000	136850000	144620000	85015000	206240000	278650000	324770000	0	205880000	201560000	236940000	312780000	348060000	262930000	252460000	0	435890000
A-kinase anchor protein 8	AKAP8	0	0	0	0	0	0	0	0	0	0	0	0	0	0	0	0	0	0	0	0	0	0	0	0
Zyxin	ZYX	0	0	0	0	0	0	0	0	0	0	0	0	0	0	0	0	0	0	0	0	0	0	0	0
Serpin B12	SERPINB12	0	0	0	0	0	0	0	0	0	0	0	0	0	0	0	0	0	0	0	0	0	0	0	0
Filamin-A	FLNA	568790	0	0	0	0	0	0	0	0	1696600	0	0	0	0	0	0	0	0	0	0	0	0	0	0
Ig heavy chain V-III region VH26		0	0	0	0	0	0	0	0	0	2101800	0	0	0	0	0	0	0	0	0	0	0	0	0	0
Gasdermin-A	GSDMA	0	0	0	0	0	0	0	0	0	3804900	0	0	0	0	0	0	0	0	0	0	0	0	0	0
Cellular retinoic acid-binding protein 2	CRABP2	0	0	0	0	0	0	0	0	0	4352700	0	0	0	0	0	0	0	0	0	0	0	0	0	0
Ig gamma-1 chain C region;Ig gamma-4 chain C region;Ig gamma-3 chain C region	IGHG1;IGHG4;IGHG3	0	0	0	0	0	0	0	0	0	10025000	0	0	0	0	0	0	0	0	0	0	0	0	0	0
Epiplakin	EPPK1	0	0	0	0	70078	0	0	0	2358800	17267000	0	0	0	0	0	0	0	0	0	0	0	0	0	0
Lamin-B1	LMNB1	0	0	0	0	0	0	0	0	0	1439900	0	797620	0	0	0	0	0	0	0	0	0	0	0	0
ADP-ribosylation factor 5;ADP-ribosylation factor 1;ADP-ribosylation factor 3	ARF5;ARF1;ARF3	0	0	0	0	96547	0	0	0	0	974570	0	0	0	2568800	0	0	0	0	0	0	0	0	0	0
Calmodulin-like protein 3	CALML3	0	0	0	0	0	0	0	0	0	932040	0	0	0	0	0	2383800	0	0	0	0	0	0	0	0
Protein S100-A2	S100A2	0	0	0	0	0	0	0	0	0	0	0	0	350430	0	0	0	176970	0	128130	0	71763	0	0	0
Caveolin-1	CAV1	1720600	0	0	0	0	0	0	0	0	0	0	0	41740000	4708600	5333700	3138200	7046100	0	1221300	0	3014200	0	0	0
Myosin-10	MYH10	0	0	0	0	0	0	0	0	0	0	0	0	0	0	0	0	38117	0	0	90254	0	0	0	0
Heterogeneous nuclear ribonucleoprotein C-like 1;Heterogeneous nuclear ribonucleoprotein C-like 2;Heterogeneous nuclear ribonucleoproteins C1/C2	LOC649330;HNRNPCL1;HNRNPCL2;HNRNPC	0	0	0	0	0	0	0	0	0	813010	0	0	0	0	0	0	0	0	0	1045800	0	0	0	0
Galectin-7	LGALS7	1851400	0	0	0	0	0	0	0	0	141920000	0	0	0	9860100	1348400	0	1362500	0	0	1558300	2652400	0	0	0
Suprabasin	SBSN	76746	0	0	0	0	0	0	0	0	0	0	0	2791100	0	0	0	0	0	0	0	0	103550	0	0
Hydroxyacylglutathione hydrolase, mitochondrial	HAGH	1851300	0	0	0	0	0	0	0	0	0	0	0	1766900	0	0	207070	1057200	695400	376350	0	644890	245400	0	0
Myosin regulatory light chain 12B	MYL12B	0	0	0	0	0	0	0	0	0	0	0	0	0	0	0	0	4935800	6775400	8814400	36886000	0	7292100	2401400	0
RNA-binding protein EWS	EWSR1	1573200	0	0	0	0	0	0	0	0	0	0	0	0	3434400	0	0	0	0	0	816850	2047500	1148900	2842900	0
Olfactory receptor 3A2;Olfactory receptor 3A3	OR3A2;OR3A3	0	0	0	0	0	0	0	0	0	0	0	0	10817000	40244000	16703000	14258000	41603000	21886000	18259000	5468400	88565000	13127000	8787400	0
Partner of Y14 and mago	WIBG	0	0	0	0	0	0	0	0	0	0	0	0	0	0	0	0	137870	0	0	74626	34050	0	0	119120
Ubiquitin-associated protein 2-like	UBAP2L	0	0	0	0	0	0	0	0	0	0	0	0	0	0	0	0	0	0	0	0	0	0	0	148650
Synaptic vesicle membrane protein VAT-1 homolog	VAT1	0	0	0	0	0	0	0	0	0	0	0	0	0	196940	0	0	341240	0	0	0	80622	0	0	292920
Leucine-rich PPR motif-containing protein, mitochondrial	LRPPRC	601400	0	0	0	0	0	0	0	0	447300	0	0	0	76284	0	0	674570	0	0	160570	0	0	235440	310240
Uncharacterized protein C11orf84	C11orf84	0	0	0	0	0	1269000	0	0	0	0	0	866980	0	241520	0	0	0	513990	599970	545540	478940	615180	0	371730
Eukaryotic translation initiation factor 4E type 2	EIF4E2	551940	0	0	0	0	0	0	0	0	0	0	1175600	2500900	1456300	946560	0	1082900	785700	776070	418700	948980	521060	797880	373690
40S ribosomal protein S29	RPS29	2361100	0	978660	0	0	0	0	0	0	0	0	1630700	840320	439800	501970	0	0	338410	0	223120	318030	378670	556760	489570
Protein-L-isoaspartate(D-aspartate) O-methyltransferase	PCMT1	0	0	0	0	0	0	0	0	0	0	0	1168500	821710	530280	0	0	690310	439880	428950	209130	334460	366490	0	521270
Importin-8	IPO8	0	0	0	0	0	0	0	0	0	0	0	0	0	0	0	0	1705900	0	0	0	823050	920780	879620	650070
Stress-induced-phosphoprotein 1	STIP1	0	0	0	0	0	0	0	0	0	0	0	1220300	0	1077700	0	0	829560	0	185140	102050	0	0	0	654260
Tropomyosin alpha-4 chain	TPM4	0	0	0	0	0	0	0	0	0	0	0	725270	2260600	3275100	1292700	0	0	785320	1534000	3574300	1284000	1021300	1695500	734430
Heterogeneous nuclear ribonucleoprotein L	HNRNPL	0	0	0	0	0	0	0	0	0	0	0	0	0	0	0	0	180400	0	0	0	134620	0	443990	814510
Protein S100-A7	S100A7	3699700	0	0	0	0	0	0	0	0	2753100	0	0	0	9737300	0	0	524300	0	5234700	31206000	38747000	0	684600	824450
Cold-inducible RNA-binding protein	CIRBP	0	0	0	0	0	0	0	0	0	0	0	0	0	0	0	0	0	703320	954160	568770	886620	540490	693000	828800
Fatty acid-binding protein, epidermal	FABP5	8998700	1460200	54346	0	0	0	0	0	0	0	0	0	0	4112300	1522900	0	608660	0	0	4231900	5790000	3635100	0	1013300
Ig kappa chain C region	IGKC	1315900	0	0	0	0	0	0	0	0	104400000	0	0	0	6146300	0	0	1229400	1359900	1315700	2990200	7431100	1341100	2085800	1268000
Serpin B4	SERPINB4	2827300	0	0	0	0	0	0	0	0	68455000	0	0	0	12819000	2609500	0	670550	1078000	5569300	9418800	24680000	503740	2104600	1376800
Peroxisomal multifunctional enzyme type 2;(3R)-hydroxyacyl-CoA dehydrogenase;Enoyl-CoA hydratase 2	HSD17B4	1219200	0	0	0	0	0	0	0	0	0	0	0	0	6308800	0	0	1914400	0	583690	1587800	1215800	0	1748000	1387400
Neutral alpha-glucosidase AB	GANAB	591940	0	0	0	0	0	0	0	0	0	0	0	0	0	0	0	1457200	126050	70015	128580	215290	153200	863000	1508000
40S ribosomal protein S10	RPS10	1202100	0	0	0	0	0	0	0	0	0	0	0	0	0	0	1064900	0	0	1607000	1370000	0	0	1732200	1582000
Tropomodulin-3	TMOD3	0	0	0	0	0	0	0	0	0	590370	0	0	0	0	0	0	1439100	1730200	0	6886100	2408500	1963800	0	1797900
Plastin-3;Plastin-2;Plastin-1	PLS3;LCP1;PLS1	0	0	0	0	0	0	0	0	0	1150600	0	0	0	3673100	0	0	606240	0	595260	0	0	0	1648700	1810900
Serpin B3	SERPINB3	3487900	0	0	0	0	0	0	0	0	1924700	0	0	0	3724400	0	0	0	0	0	0	3303600	0	0	1936100
Proteasome activator complex subunit 1	PSME1	0	0	0	0	0	0	0	0	0	0	0	0	0	876380	0	0	0	0	0	0	0	0	1396400	2111400
Long-chain-fatty-acid--CoA ligase 3	ACSL3	0	0	0	0	0	0	0	0	0	0	0	0	0	1152600	0	0	1067700	0	2490300	1631500	631950	0	2926400	2253500
40S ribosomal protein S13	RPS13	0	0	0	0	0	0	0	0	0	0	0	0	0	0	0	0	1486500	0	0	2505700	2518400	0	1308000	2258300
Cytosol aminopeptidase	LAP3	0	0	0	0	0	0	0	0	0	0	0	0	0	1312500	0	0	995770	1662100	0	112160	1210600	0	0	2356300
60S ribosomal protein L7a	RPL7A	943950	0	0	0	0	0	0	0	0	1949900	0	0	0	1819100	0	588450	0	1041400	1620100	1915200	1215100	0	3594900	2575300
Adenylyl cyclase-associated protein 1	CAP1	0	0	0	0	0	0	0	0	0	0	0	0	0	0	0	0	0	0	0	0	332380	0	0	2674700
60S ribosomal protein L27	RPL27	0	0	0	0	768380	0	0	0	0	0	0	0	0	2289600	0	935540	1455300	999800	1792000	2438400	0	1361900	3112600	2739000
Putative uncharacterized protein encoded by LINC00336	LINC00336	0	0	0	0	0	0	0	0	0	0	0	0	15141000	8607100	8172700	0	2578900	7316900	2424300	5206100	0	1536500	2018600	2860700
Putative 40S ribosomal protein S26-like 1;40S ribosomal protein S26	RPS26P11;RPS26	0	0	0	0	3968200	1042200	0	0	0	7004400	3255800	2581600	2708500	5373500	1944400	2628500	2707400	2215100	3618700	3448400	3686400	2236900	4321000	3113200
40S ribosomal protein S9	RPS9	1215200	0	50271	0	949860	0	0	0	1049900	2224600	1136200	2401200	0	4008900	2391400	1296000	1757600	0	2256700	2289100	1287200	1496700	3561600	3349100
Adenosylhomocysteinase	AHCY	1697900	0	4853400	0	0	0	0	0	0	0	0	0	0	7334300	2169100	0	4706200	685110	2201900	0	2631000	0	3331000	3378200
26S proteasome non-ATPase regulatory subunit 2	PSMD2	0	0	0	0	0	0	0	0	0	0	0	0	0	0	0	0	5894500	3584800	3236300	1652600	2764800	2935300	3556900	3447700
Galectin-3	LGALS3	1150300	0	0	0	0	0	0	0	0	1834800	0	0	0	2114700	0	1025300	1169400	0	1337100	1623000	802250	1056900	2910000	3512200
Voltage-dependent anion-selective channel protein 2	VDAC2	0	0	0	0	0	0	0	0	0	349290	0	0	0	2529500	1266900	0	0	0	983750	967220	0	0	2862900	3688800
Protein DJ-1	PARK7	679350	0	496720	0	867590	0	0	0	0	0	0	0	0	2649800	1231500	1029600	2959400	509420	0	1101300	1425900	0	4837100	4417700
Eukaryotic translation initiation factor 6	EIF6	0	0	0	0	0	0	0	0	0	0	0	0	0	0	0	0	1476800	0	0	0	0	0	0	4560500
Prostaglandin E synthase 3	PTGES3	0	0	0	0	0	0	0	0	0	0	0	0	0	5400400	0	0	0	0	1146000	1827900	0	0	3600500	5056300
NADH-cytochrome b5 reductase 3;NADH-cytochrome b5 reductase 3 membrane-bound form;NADH-cytochrome b5 reductase 3 soluble form	CYB5R3	0	0	0	0	0	0	0	0	0	372060	0	0	0	7189100	3711800	3230000	2657300	1219500	0	0	2090200	3346000	2218100	5168300
60S ribosomal protein L18	RPL18	1368400	0	0	0	0	0	0	0	2558300	1181500	0	0	0	3747900	1883700	0	5991400	2068600	3964400	3428200	2232000	2467400	4523400	5344400
Proliferation-associated protein 2G4	PA2G4	1476000	0	1564300	0	0	0	0	0	0	0	0	0	0	19117000	0	0	5300800	0	1103300	0	1002400	0	11644000	7071900
Elongation factor 1-delta	EEF1D	2107400	0	0	0	0	0	0	0	0	0	0	1349100	0	7903400	3399000	0	3426800	0	2447400	1724100	1857200	1989500	6712800	7462200
Eukaryotic translation initiation factor 5A-2;Eukaryotic translation initiation factor 5A-1-like;Eukaryotic translation initiation factor 5A-1	EIF5A2;EIF5AL1;EIF5A	0	0	0	0	0	0	0	0	0	177820	0	0	0	6185200	3604800	0	4068200	0	1750000	4293600	1476800	1293600	8108900	7602300
Glutamate dehydrogenase 1, mitochondrial;Glutamate dehydrogenase 2, mitochondrial	GLUD1;GLUD2	0	0	0	0	0	0	0	0	0	0	0	0	0	6226400	0	0	1734600	0	1982300	1408800	1829300	0	0	7659600
Peptidyl-prolyl cis-trans isomerase FKBP1A	FKBP1A	0	0	0	0	0	0	0	0	0	680210	739310	0	0	0	0	0	3896800	0	2915900	3939000	2623800	3110900	3577300	9609900
Ezrin	EZR	2654800	0	585430	0	2097500	0	0	0	0	4645800	488280	0	0	6349900	0	0	4574400	0	0	0	0	0	8493600	9877400
40S ribosomal protein S20	RPS20	9172100	0	375540	0	0	318670	0	0	3554100	16866000	3232200	14185000	0	24602000	13867000	5137600	4299100	5979200	12526000	10052000	4199800	3475200	32731000	13066000
Profilin-1	PFN1	5934400	0	0	0	1414800	0	0	0	0	583180	383410	0	0	9480100	2099300	0	8437200	0	7293800	1946000	1622500	5308700	13610000	13541000
Dihydrolipoyl dehydrogenase, mitochondrial	DLD	0	0	0	0	0	0	0	0	0	0	0	0	0	3673500	0	0	1596200	0	1436700	1518300	0	1700600	1711700	14874000
40S ribosomal protein SA	RPSA	4387800	0	110840	0	833550	0	0	0	0	1513800	502200	1838200	0	11926000	6468700	1588900	7075600	0	4480000	4266200	2588600	1076200	12174000	16181000
Unconventional myosin-Ie	MYO1E	0	0	0	0	0	0	0	0	0	0	0	0	0	0	0	0	4000900	4157600	3266000	10482000	3245600	8050100	6523700	21379000
High mobility group protein B2	HMGB2	0	0	0	0	0	0	0	0	0	0	0	0	9219300	24591000	14862000	0	13564000	0	11645000	24709000	15750000	0	20890000	32497000
14-3-3 protein theta	YWHAQ	0	0	0	0	0	0	0	0	0	2694200	0	0	0	1871500	0	0	0	0	0	0	0	0	5721500	39094000
Transketolase	TKT	3671500	0	0	0	3549400	0	0	0	0	0	0	0	3197800	27027000	10070000	2563600	33376000	792490	8180200	4542600	8352800	5708400	24617000	49103000
Transgelin-2	TAGLN2	4369600	0	6291300	0	0	0	0	0	0	904860	0	2419800	5895600	42453000	4905800	6560400	29140000	3609600	16351000	15983000	1753200	7860000	55010000	52514000
Serpin B5	SERPINB5	12756000	0	86919	0	1648800	0	0	0	0	11331000	2765200	0	8096900	64383000	28275000	4895300	32121000	4579900	14555000	11197000	16302000	8678000	78164000	89811000
Acetyl-coenzyme A synthetase, cytoplasmic	ACSS2	2327400	27984000	0	0	18517000	298420	0	0	17105000	12297000	14795000	39359000	8979300	240890000	0	0	487630000	761890000	802220000	288240000	0	902320000	0	501150000
Peroxiredoxin-6	PRDX6	13624000	880360	191520	0	729170	0	55064	0	2329500	2441100	513560	40310	18885000	47122000	28456000	18676000	17215000	8288900	11184000	19543000	16938000	14214000	41895000	53810000
Alpha-enolase	ENO1	72579000	1117400	70432000	0	58206000	156980	203910	0	2277400	14560000	5969600	24568000	50221000	209650000	121320000	44623000	247250000	9255500	100070000	62873000	71811000	44348000	235110000	301460000
Prolactin-inducible protein	PIP	2630300	0	0	0	187930	0	218150	0	916640	165800	1027900	0	0	0	0	0	346450	817680	746620	1010600	2886000	0	0	2660400
Actin, alpha skeletal muscle;Actin, alpha cardiac muscle 1;Actin, gamma-enteric smooth muscle;Actin, aortic smooth muscle	ACTA1;ACTC1;ACTG2;ACTA2	12675000	3718300	1177500	0	3691400	119550	228950	0	9515100	12396000	7764400	21757000	39730000	111410000	0	46655000	23037000	35302000	66766000	120820000	73342000	57669000	115200000	93101000
Eukaryotic initiation factor 4A-I	EIF4A1	3427800	0	92395	0	1252000	0	541300	0	0	21558000	412190	1462500	0	21945000	11856000	2313300	13188000	0	8152900	8416300	2536200	3036900	25148000	27087000
Fructose-bisphosphate aldolase A	ALDOA	6761100	0	11123000	0	2200300	0	593000	0	787060	14963000	7202200	5513000	4525600	74109000	23039000	2034800	24195000	1212900	14205000	5816400	6376600	12882000	34173000	62576000
Cathepsin D;Cathepsin D light chain;Cathepsin D heavy chain	CTSD	6103100	0	106320	0	984780	240530	745370	0	0	1537900	0	917650	0	15641000	2643700	849400	2508200	922790	2442800	2347200	2848700	1919200	4581600	4857100
Tubulin beta-3 chain	TUBB3	2791400	0	0	0	54087	0	802600	0	3944900	6815700	5428400	12628000	4168000	0	5663600	12714000	3767700	9070700	22150000	19688000	10338000	8914600	16998000	22787000
Peptidyl-prolyl cis-trans isomerase A;Peptidyl-prolyl cis-trans isomerase A, N-terminally processed	PPIA	29173000	611870	2851300	0	762540	0	1625400	0	1812500	12683000	11474000	1830300	7677900	169270000	51592000	22514000	65400000	14358000	30222000	52761000	32621000	27290000	70738000	103410000
Sodium/potassium-transporting ATPase subunit alpha-3;Sodium/potassium-transporting ATPase subunit alpha-2;Sodium/potassium-transporting ATPase subunit alpha-1;Potassium-transporting ATPase alpha chain 1	ATP1A3;ATP1A2;ATP1A1;ATP4A	0	2000200	0	0	12460000	3136300	2626900	0	88454000	0	0	0	3223700	0	0	0	10219000	0	0	0	8490200	4186500	3888500	12487000
Annexin A1	ANXA1	40616000	0	8760000	0	13012000	1609400	2788600	0	8722200	14254000	12697000	2671300	15591000	181030000	82836000	27450000	87034000	7037900	46298000	36059000	25992000	24848000	191410000	204720000
Protein S100-A9	S100A9	49635000	7556400	13323000	0	12415000	16786000	16053000	0	5030600	792310000	16532000	3431700	0	272920000	86681000	104650000	8247200	45966000	120300000	230440000	302000000	58786000	208690000	181570000
14-3-3 protein epsilon	YWHAE	1266500	0	0	0	0	0	0	18451	0	0	0	0	0	2297000	0	0	3914400	0	0	0	3051100	3368500	0	17418000
60S acidic ribosomal protein P0;60S acidic ribosomal protein P0-like	RPLP0;RPLP0P6	1673100	0	0	0	54609	0	0	27913	0	3509900	1590400	656940	1350700	11269000	4094800	3114000	1459600	727960	3569200	7142300	0	1333300	10183000	12812000
Prelamin-A/C;Lamin-A/C	LMNA	6173300	0	6500600	0	0	0	0	46253	0	37576000	0	0	0	20995000	12133000	3073400	15625000	557720	15573000	5824600	4933700	8279000	37572000	34542000
ATP synthase subunit beta, mitochondrial	ATP5B	24961000	0	2630600	0	3645100	763480	270440	91680	1455700	9771900	7746400	5258100	2892100	70220000	35779000	13134000	54115000	0	31152000	32300000	16230000	17674000	80553000	109440000
Pyruvate kinase PKM	PKM	36513000	3730200	13025000	29050	22525000	6586500	0	92732	2579200	32120000	14645000	9499500	27650000	227950000	98740000	37571000	105060000	8557500	61877000	55395000	34422000	40635000	199820000	216430000
40S ribosomal protein S3	RPS3	6793200	0	114620	0	4462600	0	2908000	136240	0	5360500	1506100	0	0	21533000	10530000	8902300	6424100	1107400	15528000	10371000	3074900	1926900	22602000	18485000
Alpha-actinin-4;Alpha-actinin-1	ACTN4;ACTN1	19063000	786340	2128000	0	8077800	0	1233700	186750	4072800	0	5119700	2189200	2960500	4139900	0	1482800	15757000	14886000	9167600	11270000	14059000	11885000	20682000	22999000
Ig kappa chain V-I region Lay;Ig kappa chain V-III region POM;Ig kappa chain V-III region VH;Ig kappa chain V-III region CLL		28957000	10111000	1457900	0	10553000	283650	2100800	221200	2759700	22676000	10965000	12559000	9009600	8579900	6014800	3845700	5840800	6721800	9280100	8782400	8507500	6347500	5207200	6783900
26S protease regulatory subunit 7	PSMC2	0	0	0	0	0	0	0	269610	0	0	0	717940	3347500	912490	1827000	0	1383600	1258900	0	1285500	1584800	1421600	2490700	1767200
Unconventional myosin-Ic	MYO1C	565750	0	0	0	0	0	0	500320	0	0	0	0	0	5045800	0	0	29137000	17619000	8988800	47237000	38700000	20175000	29082000	29149000
Carboxymethylenebutenolidase homolog	CMBL	3937000	3023600	10133000	0	6786700	3864600	4617000	506600	10252000	1229400	7769000	2256400	10806000	17588000	4490400	455370	17898000	10972000	16041000	713050	31186000	18927000	22279000	1708300
Girdin	CCDC88A	0	0	0	0	0	0	0	663160	0	0	0	0	0	0	0	0	0	0	0	0	0	0	0	0
Histone H2A type 2-C;Histone H2A type 2-A;Histone H2A.V;Histone H2A.Z;Histone H2A type 1-A	HIST2H2AC;HIST2H2AA3;H2AFV;H2AFZ;HIST1H2AA	5030100	3682600	0	0	0	0	0	752780	9285700	8774300	0	9657500	0	0	0	0	0	0	1858700	7643400	1040000	1995200	0	1989600
L-lactate dehydrogenase A chain	LDHA	15730000	0	13926000	0	4577000	1805400	1366400	764990	6878200	38751000	8459900	7450900	7098200	104880000	37601000	15350000	67684000	2693700	16809000	19424000	24076000	28898000	30445000	158320000
Peroxiredoxin-2	PRDX2	7830200	0	3660600	0	35583	0	1687500	906680	919340	6932700	2204800	2810400	0	20731000	3261900	3814400	3931900	2578300	2231000	6389900	1961600	2364900	13555000	12048000
60S ribosomal protein L38	RPL38	58765000	2773900	382470	0	7256200	193590	345130	1095300	7041800	4164700	7724600	22329000	26068000	64709000	32272000	22159000	22547000	53475000	58080000	59442000	68920000	31571000	69090000	49929000
Voltage-dependent anion-selective channel protein 1	VDAC1	2148000	0	68824	0	0	0	69776	1141700	0	7169300	2645300	5533000	5176000	48622000	8473900	1587500	2171200	1541000	21401000	14502000	4214100	2812900	29092000	57716000
Serine/threonine-protein phosphatase PGAM5, mitochondrial	PGAM5	1922600	0	767180	0	0	85965	0	1175800	2731100	0	4822900	3793000	0	0	0	0	0	0	0	0	0	0	0	0
Protein phosphatase 1B	PPM1B	6152500	3275500	143990	0	3206100	9903800	3486800	1293900	0	7505600	50418	0	20825000	17064000	13996000	10731000	24211000	34354000	35606000	31557000	39891000	27548000	22995000	31098000
4F2 cell-surface antigen heavy chain	SLC3A2	3038700	0	8073100	0	4125900	0	3271000	1551200	0	963830	973790	2327000	3763400	577990	1111200	0	6478900	1491800	1820000	1986400	2605500	1811200	6968900	4656500
Glyceraldehyde-3-phosphate dehydrogenase	GAPDH	80042000	5297900	735560	0	47070000	15578000	6575700	1667700	18279000	49582000	40957000	3440800	52078000	264580000	91917000	47760000	136260000	3966700	79932000	67682000	41621000	62284000	258420000	323430000
Desmocollin-1	DSC1	10287000	2308900	2455000	0	1862300	3129300	0	1755500	0	14869000	2673500	0	0	2003000	0	0	126960	4564400	4154400	2726600	6627800	2462000	115130	11839000
Myosin light polypeptide 6	MYL6	3581000	0	2468000	0	57505	0	0	1784800	4977400	60733000	4561900	377790	121950000	241290000	222230000	391260000	174010000	134300000	205660000	1028000000	294770000	255600000	357710000	381760000
Melanoma-associated antigen F1	MAGEF1	9168300000	4411800000	53224000	6163300	140910000	10138000	9278000	1829300	1662800000	9907500000	192380000	114210000	27277000000	13345000000	13934000000	39115000000	12141000000	21052000000	30060000000	11909000000	11127000000	18526000000	12767000000	32183000000
Large neutral amino acids transporter small subunit 1	SLC7A5	2770200	0	0	0	0	0	0	1870500	0	0	0	3095500	3022900	2322800	1613800	0	3843200	1621000	2312600	1194700	3105000	1737800	2458100	2619400
Heterogeneous nuclear ribonucleoprotein H;Heterogeneous nuclear ribonucleoprotein H, N-terminally processed	HNRNPH1	22643000	5137600	12543000	0	23240000	14375000	15048000	2122600	16418000	23896000	8358400	5501000	54932000	42088000	39063000	39481000	42148000	44457000	37153000	25426000	43923000	35466000	47490000	44919000
Aflatoxin B1 aldehyde reductase member 2	AKR7A2	3595400	0	0	0	0	0	0	2161000	1747000	0	0	0	49267000	42730000	51159000	39967000	37664000	30144000	28605000	39559000	43221000	27519000	59994000	50850000
ADP-ribosylation factor 4	ARF4	2794500	0	0	0	0	0	145320	2301100	1535600	5997200	750440	3183900	6481000	14097000	5003700	7001800	10314000	18371000	18606000	21159000	13595000	10664000	4999400	8691000
Thyroid hormone receptor-associated protein 3	THRAP3	12022000	9609400	3815900	0	12212000	5035100	5527800	2368400	30603000	5772200	10377000	2860000	1055100	14394000	4644200	3776100	2038200	31687000	21011000	16932000	3133000	12975000	25040000	35199000
78 kDa glucose-regulated protein	HSPA5	19219000	0	1516300	0	2543200	130080	7811800	2719300	8789300	34801000	9154400	13051000	4614600	38211000	20115000	22038000	28944000	13882000	34426000	37690000	12207000	22319000	82116000	82986000
ATP-dependent 6-phosphofructokinase, platelet type	PFKP	2242400	0	0	0	0	0	0	2773900	0	1707200	0	5305200	0	1360400	724400	0	8433900	4208700	7217000	10532000	2046700	16655000	8814400	6572200
Histone deacetylase 2	HDAC2	3788800	2459100	0	0	4816200	0	2810600	2813800	21414000	0	17808000	5982600	0	1470100	0	0	659120	4543600	5999300	4719600	0	4832700	6948500	3877200
Myosin-9	MYH9	14969000	26440000	2024400	0	8200200	5176700	34133000	4231000	2000100	368210000	9699100	1936800	0	3752300	1527200	3405200	338670000	30034000	41506000	153950000	47099000	59866000	28381000	66075000
Mitogen-activated protein kinase kinase kinase 7	MAP3K7	25173	0	2183400	0	0	1324800	1627400	5712300	0	2583400	1529200	3925300	0	0	0	37301	0	0	0	0	94530	0	0	0
Plectin	PLEC	10634000	36706000	10437000	0	0	3259900	0	8258800	9235500	37686000	16415000	1494800	3517300	0	0	0	761500	318930	1146200	0	787160	0	0	3806800
Tyrosine-protein kinase JAK1	JAK1	23878000	6312300	16905000	50770	3566900	3317900	3625200	9456800	10534000	34117000	4553100	9463200	21085000	7597000	12641000	9021500	41311000	45035000	14206000	8570900	39289000	33582000	34562000	45738000
Vimentin	VIM	24028000	51110000	19974000	0	41843000	14515000	10804000	12813000	70947000	105030000	37806000	44975000	1567000	1249400	4811800	3940400	367730	952600	12864000	29553000	5465200	10749000	24449000	24463000
Enhancer of rudimentary homolog	ERH	52728000	31257000	219010	0	8448500	0	15819000	15348000	18317000	33101000	2749200	16204000	20737000	49882000	49505000	79601000	14835000	65988000	79717000	92603000	42756000	61052000	81456000	104330000
Putative elongation factor 1-alpha-like 3;Elongation factor 1-alpha 1;Elongation factor 1-alpha 2	EEF1A1P5;EEF1A1;EEF1A2	191250000	28144000	553260000	322260	131530000	64517000	78688000	37155000	94303000	106990000	87279000	94237000	154700000	310470000	247160000	898650000	291610000	178400000	238090000	281800000	234620000	205150000	461170000	398090000
Phosphate carrier protein, mitochondrial	SLC25A3	2862200	0	45206000	71921	6642900	34486000	52082000	52854000	12800000	4117900	15348000	7068900	17445000	19017000	6347200	26104000	34528000	58428000	51494000	59540000	46686000	31751000	40878000	50945000
Actin, cytoplasmic 2;Actin, cytoplasmic 2, N-terminally processed;Actin, cytoplasmic 1;Actin, cytoplasmic 1, N-terminally processed	ACTG1;ACTB	234380000	134140000	352380000	235290	266680000	118740000	199830000	70579000	219530000	1420000000	306140000	388540000	844960000	3732400000	1397900000	1209200000	2153800000	1153700000	1742900000	3832900000	2371100000	1687300000	2734800000	2708400000
Serine/threonine-protein kinase 38	STK38	285700000	202120000	175510000	66167	205840000	102700000	125120000	98914000	222090000	154010000	126930000	201870000	516450000	632350000	321370000	357470000	292670000	426150000	401240000	419740000	469590000	477210000	504790000	639820000

## Sheet: S1B. All Substrate Hits
Table S2B. 40 trapped substrate protein hits from MCF10A cells
Raw values from MaxQuant label-free quantitation used in this table were taken from Table S1A: Trial 2- columns D-G; Trial 3- columns Q-T; Trial 4- columns AD-AG; Trial 5- columns AQ-AT; Trial 6- columns BD-BG
Raw data were first normalized (indicated by "WT norm", "MT norm", and MT+SA norm" for each trial) to the levels of HDAC1 in that trial (indicated by "HD1 WT", "HD1 Mutant", or "HD1 Mutant + SAHA")
Next, the normalized values were compared to yield fold enrichment ratios: No protein control divided by wild type; mutant divided by wild type; mutant divided by mutant+ SAHA (see orange highlighted columns for each trial)
In a case where the wild type or mutant+SAHA sample contained no intensity signal, an infinity (∞) sign is shown.
The number of trials where each proteins shows at least 2-fold enrichment in mutant compared to wild type, with also higher intensity in wild type compared to the no protein control and mutant compared to mutant + SAHA, is shown in column BQ (blue highlight)
The 40 proteins hits are listed in order of number of trials showing the minimal enrichment described above.
The color coding of each protein name corresponds to the number of trials where that protein was enriched: 4 trials (green), 3 trials (yellow) or 2 trials (grey)
Table S1A. 334 proteins quantified using MaxQuant from MCF10a samples
Protein names	Gene names	Localization	Trial 2- No protein	Trial 2- WT	Trial 2- MUT	Trial 2- MUT+SAHA	HD1 WT	HD1 MUT	HD1 MUT+SAHA	WT norm	MT norm	MT + SA norm	Trial 2- IgG/WT	Trial 2- MT/WT	Trial 2- MT/SAHA	Trial 3- No protein	Trial 3- WT	Trial 3- MUT	Trial 3- MUT+SAHA	HD1 WT	HD1 Mutant	HD1 Mutant+SAHA	WT norm	MT norm	MT + SA norm	Trial 3- IgG/WT	Trial 3- MT/WT	Trial 3- MT/SAHA	Trial 4- No protein	Trial 4- WT	Trial 4- MUT	Trial 4- MUT+SAHA	HD1 WT	HD1 Mutant	HD1 Mutant+SAHA	WT norm	MT norm	MT +SA norm	Trial 4- IgG/WT	Trial 4- MT/WT	Trial 4- MT/SAHA	Trial 5- No protein	Trial 5- WT	Trial 5- MUT	Trial 5- MUT+SAHA	HD1 WT	HD1 Mutant	HD1 Mutant+SAHA	WT norm
Poly(rC)-binding protein 1;Poly(rC)-binding protein 2;Poly(rC)-binding protein 3	PCBP1;PCBP2;PCBP3	M	0	0	736490	0	3763400000	3519500000	2541400000	0	0.00020926	0	0	∞	∞	0	139590	3389300	0	1650500000	1849700000	3454200000	8.45744e-05	0.00183235	0	0	21.6656	∞	0	5754500	11497000	0	2634800000	1335600000	1781200000	0.00218404	0.00860812	0	0	3.94138	∞	3897000	0	1589800	1723100	1584900000	2579400000	2056500000	0
Calcium-binding mitochondrial carrier protein Aralar2;Calcium-binding mitochondrial carrier protein Aralar1	SLC25A13;SLC25A12	M	0	0	0	276100	3763400000	3519500000	2541400000	0	0	0.000108641	0	0	0	0	0	2470900	2458600	1650500000	1849700000	3454200000	0	0.00133584	0.000711771	0	∞	1.87678	0	0	1660900	0	2634800000	1335600000	1781200000	0	0.00124356	0	0	∞	∞	0	0	4123400	3163000	1584900000	2579400000	2056500000	0
Mitochondrial import receptor subunit TOM22 homolog	TOMM22	M	0	0	1711200	0	3763400000	3519500000	2541400000	0	0.000486205	0	0	∞	∞	0	0	1322600	1142000	1650500000	1849700000	3454200000	0	0.000715035	0.000330612	0	∞	2.16276	0	0	0	87587	2634800000	1335600000	1781200000	0	0	4.9173e-05	0	0	0	0	96490	461360	220710	1584900000	2579400000	2056500000	6.08808e-05
Superoxide dismutase [Mn], mitochondrial	SOD2	N/C	0	0	88950	0	3763400000	3519500000	2541400000	0	2.52735e-05	0	0	∞	∞	0	1064700	1525800	0	1650500000	1849700000	3454200000	0.000645077	0.000824891	0	0	1.27875	∞	0	49504000	31900000	9622100	2634800000	1335600000	1781200000	0.0187885	0.0238844	0.00540203	0	1.27122	4.42137	5322200	0	21502000	19554000	1584900000	2579400000	2056500000	0
Histone-binding protein RBBP4	RBBP4	N	0	2517600	11419000	2766300	3763400000	3519500000	2541400000	0.00066897	0.00324449	0.00108849	0	4.84999	2.98072	0	6379700	402360	11016000	1650500000	1849700000	3454200000	0.00386531	0.000217527	0.00318916	0	0.0562767	0.0682083	0	4420600	1908600	11731000	2634800000	1335600000	1781200000	0.00167777	0.00142902	0.00658601	0	0.851736	0.216978	0	11050000	28477000	18514000	1584900000	2579400000	2056500000	0.00697205
T-complex protein 1 subunit epsilon	CCT5	C	0	153350000	205430000	89851000	3763400000	3519500000	2541400000	0.0407477	0.0583691	0.0353549	0	1.43245	1.65095	0	64427000	202680000	127080000	1650500000	1849700000	3454200000	0.0390348	0.109575	0.03679	0	2.8071	2.97838	0	97151000	80280000	108800000	2634800000	1335600000	1781200000	0.0368722	0.0601078	0.0610824	0	1.63016	0.984045	2410100	85798000	305780000	241280000	1584900000	2579400000	2056500000	0.0541346
T-complex protein 1 subunit alpha	TCP1	C	0	58563000	99663000	45563000	3763400000	3519500000	2541400000	0.0155612	0.0283174	0.0179283	0	1.81974	1.57948	18839000	29526000	155590000	194840000	1650500000	1849700000	3454200000	0.0178891	0.0841163	0.0564067	0.638048	4.70209	1.49125	39018000	66109000	78983000	164280000	2634800000	1335600000	1781200000	0.0250907	0.0591367	0.09223	0.590207	2.35692	0.641188	30163000	87558000	207390000	224060000	1584900000	2579400000	2056500000	0.0552451
Heat shock cognate 71 kDa protein	HSPA8	C	17868000	26528000	73285000	51359000	3763400000	3519500000	2541400000	0.00704895	0.0208226	0.0202089	0.673552	2.954	1.03036	26153000	107070000	226200000	198290000	1650500000	1849700000	3454200000	0.0648713	0.12229	0.0574055	0.244261	1.88512	2.13029	60845000	292820000	444210000	584780000	2634800000	1335600000	1781200000	0.111136	0.332592	0.328307	0.20779	2.99267	1.01305	118990000	159170000	771730000	671690000	1584900000	2579400000	2056500000	0.100429
T-complex protein 1 subunit beta	CCT2	C	0	45233000	78334000	52979000	3763400000	3519500000	2541400000	0.0120192	0.0222571	0.0208464	0	1.8518	1.06767	0	42519000	170310000	159710000	1650500000	1849700000	3454200000	0.0257613	0.0920744	0.0462365	0	3.57414	1.99138	0	57022000	89043000	129710000	2634800000	1335600000	1781200000	0.0216419	0.0666689	0.0728217	0	3.08055	0.915509	4108000	68663000	231610000	232370000	1584900000	2579400000	2056500000	0.0433232
60S ribosomal protein L29	RPL29	C	7141900	3971700	4010500	0	3763400000	3519500000	2541400000	0.00105535	0.00113951	0	1.7982	1.07975	∞	15400000	0	14604000	0	1650500000	1849700000	3454200000	0	0.00789533	0	∞	∞	∞	0	0	6491500	14923000	2634800000	1335600000	1781200000	0	0.00486036	0.00837806	0	∞	0.58013	0	0	5505200	3440700	1584900000	2579400000	2056500000	0
Protein S100-A6	S100A6	C	34045000	12423000	9221900	0	3763400000	3519500000	2541400000	0.003301	0.00262023	0	2.74048	0.793768	∞	18316000	6932900	17247000	8968900	1650500000	1849700000	3454200000	0.00420048	0.00932421	0.00259652	2.6419	2.21979	3.59104	3907300	15991000	29782000	5568400	2634800000	1335600000	1781200000	0.00606915	0.0222986	0.00312621	0.244344	3.67409	7.13279	4578800	143430	403680	17162000	1584900000	2579400000	2056500000	9.04978e-05
Chromodomain-helicase-DNA-binding protein 4;Chromodomain-helicase-DNA-binding protein 5	CHD4;CHD5	N	0	1393600	3423500	1051600	3763400000	3519500000	2541400000	0.000370303	0.000972723	0.000413788	0	2.62683	2.35078	0	489500	1779000	0	1650500000	1849700000	3454200000	0.000296577	0.000961778	0	0	3.24293	∞	0	0	0	0	2634800000	1335600000	1781200000	0	0	0	0	0	0	0	0	0	702030	1584900000	2579400000	2056500000	0
Keratin, type I cytoskeletal 18	KRT18	N	0	0	9684300	2142400	3763400000	3519500000	2541400000	0	0.00275161	0.000843	0	∞	3.26407	11454000	10190000	6145800	12384000	1650500000	1849700000	3454200000	0.00617389	0.00332259	0.0035852	1.12404	0.538169	0.926752	0	1768800	2015600	0	2634800000	1335600000	1781200000	0.000671322	0.00150913	0	0	2.248	∞	175120	0	5884600	5986100	1584900000	2579400000	2056500000	0
ELM2 and SANT domain-containing protein 1	ELMSAN1	N	0	0	0	3230200	3763400000	3519500000	2541400000	0	0	0.00127103	0	0	0	0	0	4786600	2830800	1650500000	1849700000	3454200000	0	0.00258777	0.000819524	0	∞	3.15765	0	2547000	0	0	2634800000	1335600000	1781200000	0.000966677	0	0	0	0	0	0	1450600	1516000	1602000	1584900000	2579400000	2056500000	0.000915263
Dermcidin;Survival-promoting peptide;DCD-1	DCD	ER	0	0	13844000	4994000	3763400000	3519500000	2541400000	0	0.00393351	0.00196506	0	∞	2.00173	17599000	13413000	8668000	7694200	1650500000	1849700000	3454200000	0.00812663	0.00468617	0.00222749	1.31209	0.576643	2.10379	0	0	315410	0	2634800000	1335600000	1781200000	0	0.000236156	0	0	∞	∞	0	2131900	3889900	0	1584900000	2579400000	2056500000	0.00134513
T-complex protein 1 subunit delta	CCT4	C	0	26204000	97202000	63762000	3763400000	3519500000	2541400000	0.00696285	0.0276181	0.0250893	0	3.9665	1.10079	0	45407000	126760000	235140000	1650500000	1849700000	3454200000	0.0275111	0.06853	0.0680736	0	2.491	1.0067	4421800	55249000	76465000	116380000	2634800000	1335600000	1781200000	0.020969	0.0572514	0.065338	0.080034	2.73029	0.876235	3975000	55890000	230160000	198150000	1584900000	2579400000	2056500000	0.0352641
T-complex protein 1 subunit eta	CCT7	C	321560	63446000	98483000	72414000	3763400000	3519500000	2541400000	0.0168587	0.0279821	0.0284937	0.00506825	1.6598	0.982044	0	26359000	175730000	134090000	1650500000	1849700000	3454200000	0.0159703	0.0950046	0.0388194	0	5.94883	2.44735	1048000	96053000	125810000	141850000	2634800000	1335600000	1781200000	0.0364555	0.0941974	0.0796373	0.0109106	2.5839	1.18283	11950000	63688000	201250000	183860000	1584900000	2579400000	2056500000	0.0401842
40S ribosomal protein S5;40S ribosomal protein S5, N-terminally processed	RPS5	C	0	0	0	0	3763400000	3519500000	2541400000	0	0	0	0	0	0	0	0	0	0	1650500000	1849700000	3454200000	0	0	0	0	0	0	0	2065300	973520	0	2634800000	1335600000	1781200000	0.000783855	0.000728901	0	0	0.929893	∞	0	0	1530300	0	1584900000	2579400000	2056500000	0
60S ribosomal protein L14	RPL14	C	44107	0	0	0	3763400000	3519500000	2541400000	0	0	0	∞	0	0	0	0	0	0	1650500000	1849700000	3454200000	0	0	0	0	0	0	0	0	1764500	0	2634800000	1335600000	1781200000	0	0.00132113	0	0	∞	∞	0	0	0	0	1584900000	2579400000	2056500000	0
Probable ATP-dependent RNA helicase DDX41	DDX41	N	0	0	0	0	3763400000	3519500000	2541400000	0	0	0	0	0	0	0	0	2977200	0	1650500000	1849700000	3454200000	0	0.00160956	0	0	∞	∞	0	0	0	0	2634800000	1335600000	1781200000	0	0	0	0	0	0	0	1740200	0	0	1584900000	2579400000	2056500000	0.00109799
Small nuclear ribonucleoprotein F	SNRPF	N/C	0	0	0	0	3763400000	3519500000	2541400000	0	0	0	0	0	0	0	0	0	0	1650500000	1849700000	3454200000	0	0	0	0	0	0	0	0	490840	0	2634800000	1335600000	1781200000	0	0.000367505	0	0	∞	∞	278400	160680	398240	460160	1584900000	2579400000	2056500000	0.000101382
Annexin A4	ANXA4	N/A	1833900	0	0	0	3763400000	3519500000	2541400000	0	0	0	∞	0	0	0	0	0	0	1650500000	1849700000	3454200000	0	0	0	0	0	0	0	827170	1068300	0	2634800000	1335600000	1781200000	0.00031394	0.000799865	0	0	2.54783	∞	0	0	573630	573900	1584900000	2579400000	2056500000	0
Y-box-binding protein 3	YBX3	N/C	0	0	0	0	3763400000	3519500000	2541400000	0	0	0	0	0	0	0	0	0	0	1650500000	1849700000	3454200000	0	0	0	0	0	0	0	0	0	0	2634800000	1335600000	1781200000	0	0	0	0	0	0	0	0	1397300	0	1584900000	2579400000	2056500000	0
Nucleolin	NCL	N/C	0	27718	0	0	3763400000	3519500000	2541400000	7.36515e-06	0	0	0	0	0	0	0	0	0	1650500000	1849700000	3454200000	0	0	0	0	0	0	0	0	1996400	0	2634800000	1335600000	1781200000	0	0.00149476	0	0	∞	∞	0	0	0	0	1584900000	2579400000	2056500000	0
Tubulin alpha-1C chain;Tubulin alpha-8 chain	TUBA1C;TUBA8	C	0	0	0	0	3763400000	3519500000	2541400000	0	0	0	0	0	0	0	79457	843080	0	1650500000	1849700000	3454200000	4.81412e-05	0.000455793	0	0	9.46784	∞	0	3715100	0	4800600	2634800000	1335600000	1781200000	0.00141001	0	0.00269515	0	0	0	3220800	0	7928700	4875700	1584900000	2579400000	2056500000	0
60S ribosomal protein L10a	RPL10A	C	0	0	37597	0	3763400000	3519500000	2541400000	0	1.06825e-05	0	0	∞	∞	0	578570	1815000	1976600	1650500000	1849700000	3454200000	0.000350542	0.00098124	0.000572231	0	2.79921	1.71476	1588800	5223600	982480	0	2634800000	1335600000	1781200000	0.00198254	0.000735609	0	0.304158	0.371044	∞	1479700	961310	1567800	3710600	1584900000	2579400000	2056500000	0.000606543
DnaJ homolog subfamily A member 3, mitochondrial	DNAJA3	M	0	0	611850	0	3763400000	3519500000	2541400000	0	0.000173846	0	0	∞	∞	0	0	0	1627000	1650500000	1849700000	3454200000	0	0	0.000471021	0	0	0	0	393820	0	0	2634800000	1335600000	1781200000	0.000149469	0	0	0	0	0	0	0	737810	0	1584900000	2579400000	2056500000	0
Protein disulfide-isomerase A3	PDIA3	ER	9397800	0	6595100	0	3763400000	3519500000	2541400000	0	0.00187387	0	∞	∞	∞	0	0	2420600	0	1650500000	1849700000	3454200000	0	0.00130864	0	0	∞	∞	942800	19105000	33622000	0	2634800000	1335600000	1781200000	0.00725102	0.0251737	0	0.0493483	3.47174	∞	13916000	1914000	12095000	14782000	1584900000	2579400000	2056500000	0.00120765
60S ribosomal protein L23	RPL23	C	4876000	0	8136000	0	3763400000	3519500000	2541400000	0	0.00231169	0	∞	∞	∞	0	2623100	7599300	0	1650500000	1849700000	3454200000	0.00158928	0.0041084	0	0	2.58507	∞	6948200	11051000	15224000	6360400	2634800000	1335600000	1781200000	0.00419425	0.0113986	0.00357085	0.628739	2.71768	3.19213	14036000	11976000	28016000	13591000	1584900000	2579400000	2056500000	0.00755631
Sin3 histone deacetylase corepressor complex component SDS3	SUDS3	N	0	0	2685800	1500300	3763400000	3519500000	2541400000	0	0.00076312	0.000590344	0	∞	1.29267	0	0	4763600	1946500	1650500000	1849700000	3454200000	0	0.00257534	0.000563517	0	∞	4.57011	0	0	0	1151900	2634800000	1335600000	1781200000	0	0	0.000646699	0	0	0	0	1510000	5998100	5662700	1584900000	2579400000	2056500000	0.000952741
Basigin	BSG	Membrane	0	0	0	1883700	3763400000	3519500000	2541400000	0	0	0.000741206	0	0	0	0	0	3297900	2135800	1650500000	1849700000	3454200000	0	0.00178294	0.00061832	0	∞	2.88352	2124900	9085100	2316300	2558700	2634800000	1335600000	1781200000	0.00344812	0.00173428	0.0014365	0.233888	0.502963	1.20729	5851500	772800	3105800	2167500	1584900000	2579400000	2056500000	0.000487602
14-3-3 protein zeta/delta	YWHAZ	C	21015000	2548100	4988200	2060800	3763400000	3519500000	2541400000	0.000677074	0.0014173	0.000810892	8.24732	2.09328	1.74783	0	79494000	20912000	12311000	1650500000	1849700000	3454200000	0.0481636	0.0113056	0.00356407	0	0.234734	3.17211	5020000	62953000	96107000	0	2634800000	1335600000	1781200000	0.0238929	0.0719579	0	0.079742	3.01169	∞	19976000	728780	25430000	21692000	1584900000	2579400000	2056500000	0.000459827
Deoxynucleoside triphosphate triphosphohydrolase SAMHD1	SAMHD1	N	0	0	0	2555500	3763400000	3519500000	2541400000	0	0	0.00100555	0	0	0	0	0	0	2394200	1650500000	1849700000	3454200000	0	0	0.000693127	0	0	0	0	0	3993900	0	2634800000	1335600000	1781200000	0	0.00299034	0	0	∞	∞	0	0	2586800	3108300	1584900000	2579400000	2056500000	0
Elongation factor Tu, mitochondrial	TUFM	M	0	3409100	6511800	3086400	3763400000	3519500000	2541400000	0.000905856	0.00185021	0.00121445	0	2.04249	1.52349	0	1140300	9787600	5589400	1650500000	1849700000	3454200000	0.000690882	0.00529145	0.00161815	0	7.65899	3.27007	16393000	12594000	7633800	4562400	2634800000	1335600000	1781200000	0.00477987	0.00571563	0.00256142	1.30165	1.19577	2.23143	8086900	9744000	13375000	11399000	1584900000	2579400000	2056500000	0.00614802
Emerin	EMD	N	0	0	5189100	3300300	3763400000	3519500000	2541400000	0	0.00147439	0.00129861	0	∞	1.13535	0	0	0	6501700	1650500000	1849700000	3454200000	0	0	0.00188226	0	0	0	0	0	0	0	2634800000	1335600000	1781200000	0	0	0	0	0	0	0	0	1298100	575130	1584900000	2579400000	2056500000	0
Histone H4	HIST1H4A	N	0	0	6607000	3599000	3763400000	3519500000	2541400000	0	0.00187726	0.00141615	0	∞	1.32561	155600000	42767000	17530000	19492000	1650500000	1849700000	3454200000	0.0259115	0.00947721	0.00564299	3.63832	0.365753	1.67947	0	35956000	14382000	16555000	2634800000	1335600000	1781200000	0.0136466	0.0107682	0.0092943	0	0.789077	1.15858	1346300	3672900	71298000	109590000	1584900000	2579400000	2056500000	0.00231743
Monocarboxylate transporter 4	SLC16A3	membrane	1286600	1985000	10271000	7687100	3763400000	3519500000	2541400000	0.000527449	0.00291831	0.00302475	0.648161	5.53288	0.964811	0	2576400	6682000	1755900	1650500000	1849700000	3454200000	0.00156098	0.00361248	0.000508338	0	2.31423	7.10645	0	0	402780	0	2634800000	1335600000	1781200000	0	0.000301572	0	0	∞	∞	1386900	1171300	1487100	848610	1584900000	2579400000	2056500000	0.000739037
Tricarboxylate transport protein, mitochondrial	SLC25A1	M	0	26269	11780000	11806000	3763400000	3519500000	2541400000	6.98012e-06	0.00334707	0.00464547	0	479.514	0.720501	0	2831800	11633000	9478000	1650500000	1849700000	3454200000	0.00171572	0.00628913	0.00274391	0	3.66559	2.29203	944520	4757500	8537000	7538100	2634800000	1335600000	1781200000	0.00180564	0.00639188	0.00423203	0.198533	3.53995	1.51036	0	4326700	11090000	19121000	1584900000	2579400000	2056500000	0.00272995
Heat shock 70 kDa protein 6;Putative heat shock 70 kDa protein 7	HSPA6;HSPA7	C	30734000	21789000	56873000	65314000	3763400000	3519500000	2541400000	0.00578971	0.0161594	0.0257	1.41053	2.79105	0.62877	0	25928000	28762000	65607000	1650500000	1849700000	3454200000	0.0157092	0.0155495	0.0189934	0	0.989838	0.818682	26603000	146130000	179240000	57380000	2634800000	1335600000	1781200000	0.0554615	0.134202	0.0322142	0.18205	2.41973	4.16592	40497000	102830000	373430000	316170000	1584900000	2579400000	2056500000	0.0648811
ADP/ATP translocase 2;ADP/ATP translocase 2, N-terminally processed	SLC25A5	M	20355000	31568000	112600000	75447000	3763400000	3519500000	2541400000	0.00838816	0.0319932	0.0296872	0.644799	3.81409	1.07768	15953000	28410000	217480000	71311000	1650500000	1849700000	3454200000	0.017213	0.117576	0.0206447	0.561528	6.83065	5.6952	102550000	102430000	141430000	217590000	2634800000	1335600000	1781200000	0.0388758	0.105892	0.122159	1.00117	2.72387	0.86684	33476000	83939000	234200000	190360000	1584900000	2579400000	2056500000	0.0529617
Methyl-CpG-binding domain protein 2	MBD2		0	77464	611470	92228	3763400000	3519500000	2541400000	2.05835e-05	0.000173738	3.62902e-05	0	8.44063	4.78745	0	6988600	112900	10043000	1650500000	1849700000	3454200000	0.00423423	6.10369e-05	0.00290747	0	0.0144151	0.0209931	0	7827800	6619600	5980700	2634800000	1335600000	1781200000	0.00297093	0.00495627	0.00335768	0	1.66826	1.4761	0	4266200	8685100	7262400	1584900000	2579400000	2056500000	0.00269178
Transcriptional repressor p66-beta	GATAD2B		0	44781000	24012000	23585000	3763400000	3519500000	2541400000	0.0118991	0.00682256	0.00928032	0	0.573369	0.735164	0	2146200	30041000	40304000	1650500000	1849700000	3454200000	0.00130033	0.016241	0.0116681	0	12.4899	1.39191	0	13031000	11490000	39439000	2634800000	1335600000	1781200000	0.00494573	0.00860288	0.0221418	0	1.73946	0.388535	0	24709000	50361000	33280000	1584900000	2579400000	2056500000	0.0155903
T-complex protein 1 subunit theta	CCT8		279540	122850000	224200000	148710000	3763400000	3519500000	2541400000	0.0326434	0.0637022	0.058515	0.00227546	1.95146	1.08865	0	54357000	182700000	301380000	1650500000	1849700000	3454200000	0.0329337	0.0987728	0.0872503	0	2.99914	1.13206	0	115660000	91559000	112770000	2634800000	1335600000	1781200000	0.0438971	0.0685527	0.0633113	0	1.56167	1.08279	10765000	73082000	322690000	335260000	1584900000	2579400000	2056500000	0.0461114
Transcriptional repressor p66-alpha	GATAD2A		0	3886000	2263800	3044900	3763400000	3519500000	2541400000	0.00103258	0.000643216	0.00119812	0	0.622923	0.536855	0	0	2772400	2824100	1650500000	1849700000	3454200000	0	0.00149884	0.000817584	0	∞	1.83325	0	0	0	0	2634800000	1335600000	1781200000	0	0	0	0	0	0	0	156000	338370	131600	1584900000	2579400000	2056500000	9.84289e-05
Small nuclear ribonucleoprotein Sm D2	SNRPD2		2520000	4640400	3620000	4296800	3763400000	3519500000	2541400000	0.00123303	0.00102856	0.00169072	0.543057	0.834166	0.608353	0	4733100	5873600	3919700	1650500000	1849700000	3454200000	0.00286768	0.00317543	0.00113476	0	1.10732	2.79832	9458300	29733000	30092000	6737600	2634800000	1335600000	1781200000	0.0112847	0.0225307	0.00378262	0.318108	1.99657	5.95638	5766600	15487000	14747000	6423200	1584900000	2579400000	2056500000	0.00977159
Paired amphipathic helix protein Sin3a	SIN3A		0	8093500	10338000	7008800	3763400000	3519500000	2541400000	0.00215058	0.00293735	0.00275785	0	1.36584	1.06509	0	0	3523100	5471000	1650500000	1849700000	3454200000	0	0.00190469	0.00158387	0	∞	1.20255	0	610280	0	0	2634800000	1335600000	1781200000	0.000231623	0	0	0	0	0	0	4320300	0	0	1584900000	2579400000	2056500000	0.00272591
Metastasis-associated protein MTA2	MTA2		0	119440000	137220000	64924000	3763400000	3519500000	2541400000	0.0317373	0.0389885	0.0255465	0	1.22848	1.52617	20506000	28361000	99528000	90247000	1650500000	1849700000	3454200000	0.0171833	0.0538076	0.0261267	0.723035	3.1314	2.05949	4829900	59412000	28444000	43728000	2634800000	1335600000	1781200000	0.022549	0.0212968	0.0245497	0.081295	0.944469	0.867496	1363200	56883000	128480000	116030000	1584900000	2579400000	2056500000	0.0358906
TGF-beta-activated kinase 1 and MAP3K7-binding protein 3	TAB3		0	0	0	0	3763400000	3519500000	2541400000	0	0	0	0	0	0	0	945980	1351700	1905100	1650500000	1849700000	3454200000	0.000573148	0.000730767	0.000551531	0	1.27501	1.32498	0	0	0	0	2634800000	1335600000	1781200000	0	0	0	0	0	0	0	0	0	0	1584900000	2579400000	2056500000	0
Nicotinamide phosphoribosyltransferase	NAMPT		0	0	0	0	3763400000	3519500000	2541400000	0	0	0	0	0	0	0	300500	0	0	1650500000	1849700000	3454200000	0.000182066	0	0	0	0	0	0	2521100	2496100	0	2634800000	1335600000	1781200000	0.000956847	0.0018689	0	0	1.95318	∞	0	0	0	0	1584900000	2579400000	2056500000	0
Chloride intracellular channel protein 1	CLIC1		0	0	0	0	3763400000	3519500000	2541400000	0	0	0	0	0	0	0	0	1437400	1006500	1650500000	1849700000	3454200000	0	0.000777099	0.000291384	0	∞	2.66692	0	8173000	5029000	1816600	2634800000	1335600000	1781200000	0.00310194	0.00376535	0.00101987	0	1.21387	3.69197	2519500	0	1644200	1350700	1584900000	2579400000	2056500000	0
60S acidic ribosomal protein P2	RPLP2		62806	0	0	0	3763400000	3519500000	2541400000	0	0	0	∞	0	0	0	0	447010	0	1650500000	1849700000	3454200000	0	0.000241666	0	0	∞	∞	3081200	13425000	8774400	6920000	2634800000	1335600000	1781200000	0.00509526	0.00656963	0.00388502	0.229512	1.28936	1.69102	10396000	4080300	6339500	13432000	1584900000	2579400000	2056500000	0.00257448
Protein disulfide-isomerase	P4HB		242410	0	0	0	3763400000	3519500000	2541400000	0	0	0	∞	0	0	0	336960	0	1943900	1650500000	1849700000	3454200000	0.000204156	0	0.000562764	0	0	0	1794800	18812000	11636000	0	2634800000	1335600000	1781200000	0.00713982	0.00871219	0	0.0954072	1.22023	∞	11364000	0	4389100	5617100	1584900000	2579400000	2056500000	0
Calmodulin-regulated spectrin-associated protein 3	CAMSAP3		0	0	52161	0	3763400000	3519500000	2541400000	0	1.48206e-05	0	0	∞	∞	0	0	0	0	1650500000	1849700000	3454200000	0	0	0	0	0	0	0	4671600	3354900	3898200	2634800000	1335600000	1781200000	0.00177304	0.0025119	0.00218852	0	1.41672	1.14776	2679700	2380700	2939700	2221300	1584900000	2579400000	2056500000	0.00150211
Small nuclear ribonucleoprotein Sm D3	SNRPD3		0	0	80746	0	3763400000	3519500000	2541400000	0	2.29425e-05	0	0	∞	∞	3016300	14243000	0	0	1650500000	1849700000	3454200000	0.00862951	0	0	0.211774	0	0	10500000	23577000	14570000	12236000	2634800000	1335600000	1781200000	0.00894831	0.010909	0.00686953	0.445349	1.21911	1.58802	6333800	12265000	10998000	11709000	1584900000	2579400000	2056500000	0.00773866
40S ribosomal protein S23	RPS23		0	0	126600	0	3763400000	3519500000	2541400000	0	3.5971e-05	0	0	∞	∞	1590800	0	441060	0	1650500000	1849700000	3454200000	0	0.000238449	0	∞	∞	∞	2442800	5568700	3938700	2588900	2634800000	1335600000	1781200000	0.00211352	0.00294901	0.00145346	0.438666	1.39531	2.02896	1876900	1837200	3390700	5381500	1584900000	2579400000	2056500000	0.00115919
40S ribosomal protein S15a	RPS15A		0	0	691830	0	3763400000	3519500000	2541400000	0	0.000196571	0	0	∞	∞	620630	1397800	1407100	0	1650500000	1849700000	3454200000	0.000846895	0.000760718	0	0.444005	0.898244	∞	0	3227800	2394200	1089100	2634800000	1335600000	1781200000	0.00122506	0.0017926	0.000611442	0	1.46327	2.93176	1524300	0	3413600	3610100	1584900000	2579400000	2056500000	0
Protein S100-A8;Protein S100-A8, N-terminally processed	S100A8		0	0	1064200	0	3763400000	3519500000	2541400000	0	0.000302372	0	0	∞	∞	0	216430000	6378800	8738300	1650500000	1849700000	3454200000	0.13113	0.00344856	0.00252976	0	0.0262988	1.3632	0	122630000	90336000	20481000	2634800000	1335600000	1781200000	0.0465424	0.067637	0.0114984	0	1.45323	5.88228	5529000	8323500	38521000	60969000	1584900000	2579400000	2056500000	0.00525175
Sulfide:quinone oxidoreductase, mitochondrial	SQRDL		0	106370	2090100	0	3763400000	3519500000	2541400000	2.82643e-05	0.000593863	0	0	21.011	∞	0	5670900	7739500	59286	1650500000	1849700000	3454200000	0.00343587	0.00418419	1.71635e-05	0	1.2178	243.785	0	15119000	6952900	11181000	2634800000	1335600000	1781200000	0.0057382	0.00520583	0.00627723	0	0.907223	0.829319	3451600	3070400	12130000	9628500	1584900000	2579400000	2056500000	0.00193728
Ig kappa chain V-IV region Len;Ig kappa chain V-IV region;Ig kappa chain V-IV region JI;Ig kappa chain V-IV region B17;Ig kappa chain V-IV region STH	IGKV4-1		45304	69919	2908900	0	3763400000	3519500000	2541400000	1.85787e-05	0.000826509	0	0.64795	44.487	∞	3296500	0	30180000	1312300	1650500000	1849700000	3454200000	0	0.0163162	0.000379914	∞	∞	42.9469	25660000	27944000	21079000	21178000	2634800000	1335600000	1781200000	0.0106057	0.0157824	0.0118897	0.918265	1.4881	1.3274	10004000	13492000	16091000	17117000	1584900000	2579400000	2056500000	0.00851284
Small nuclear ribonucleoprotein-associated protein N;Small nuclear ribonucleoprotein-associated proteins B and B	SNRPN;SNRPB		0	0	232120	53607	3763400000	3519500000	2541400000	0	6.59526e-05	2.10935e-05	0	∞	3.12668	0	0	0	59317	1650500000	1849700000	3454200000	0	0	1.71724e-05	0	0	0	0	13194000	12454000	11128000	2634800000	1335600000	1781200000	0.00500759	0.00932465	0.00624747	0	1.8621	1.49255	7145200	6797100	11853000	11278000	1584900000	2579400000	2056500000	0.00428866
Unconventional myosin-Ib	MYO1B		0	78774	4040700	132760	3763400000	3519500000	2541400000	2.09316e-05	0.00114809	5.22389e-05	0	54.8496	21.9777	601440	6730900	9422300	11255000	1650500000	1849700000	3454200000	0.0040781	0.00509396	0.00325835	0.0893551	1.2491	1.56336	0	56703000	1606100	50369000	2634800000	1335600000	1781200000	0.0215208	0.00120253	0.0282781	0	0.0558776	0.0425251	64577000	57550000	51925000	10817000	1584900000	2579400000	2056500000	0.0363114
60S ribosomal protein L3	RPL3		0	1014300	979270	1391200	3763400000	3519500000	2541400000	0.000269517	0.000278241	0.000547415	0	1.03237	0.508282	0	0	1868200	750780	1650500000	1849700000	3454200000	0	0.00101	0.000217353	0	∞	4.64683	2499900	4659700	2853400	0	2634800000	1335600000	1781200000	0.00176852	0.00213642	0	0.536494	1.20803	∞	1432100	1636900	2870600	3220300	1584900000	2579400000	2056500000	0.00103281
Heterogeneous nuclear ribonucleoprotein F;Heterogeneous nuclear ribonucleoprotein F, N-terminally processed	HNRNPF		0	2316900	3086300	3441400	3763400000	3519500000	2541400000	0.00061564	0.000876914	0.00135414	0	1.42439	0.647582	0	2834500	4054200	4244000	1650500000	1849700000	3454200000	0.00171736	0.00219181	0.00122865	0	1.27627	1.78392	0	0	642750	0	2634800000	1335600000	1781200000	0	0.000481244	0	0	∞	∞	691740	568240	1125700	591240	1584900000	2579400000	2056500000	0.000358534
Tubulin beta-2B chain;Tubulin beta-2A chain	TUBB2B;TUBB2A		0	0	2160700	4823800	3763400000	3519500000	2541400000	0	0.000613922	0.00189809	0	∞	0.323443	0	0	6115600	3968400	1650500000	1849700000	3454200000	0	0.00330627	0.00114886	0	∞	2.87786	0	0	0	0	2634800000	1335600000	1781200000	0	0	0	0	0	0	2509200	2784200	4683300	5210800	1584900000	2579400000	2056500000	0.0017567
Histone-binding protein RBBP7	RBBP7		0	3509900	6499900	12494000	3763400000	3519500000	2541400000	0.000932641	0.00184682	0.00491619	0	1.98021	0.375662	0	6957600	1856300	4740500	1650500000	1849700000	3454200000	0.00421545	0.00100357	0.00137239	0	0.238069	0.731257	0	14340000	11609000	13499000	2634800000	1335600000	1781200000	0.00544254	0.00869197	0.0075786	0	1.59704	1.14691	0	2556100	42918000	16202000	1584900000	2579400000	2056500000	0.00161278
Ubiquitin-60S ribosomal protein L40;Ubiquitin;60S ribosomal protein L40;Ubiquitin-40S ribosomal protein S27a;Ubiquitin;40S ribosomal protein S27a;Polyubiquitin-B;Ubiquitin;Polyubiquitin-C;Ubiquitin	UBA52;RPS27A;UBB;UBC		16262000	16741000	22837000	47651000	3763400000	3519500000	2541400000	0.00444837	0.00648871	0.0187499	0.971388	1.45867	0.346066	20479000	31737000	71286000	112380000	1650500000	1849700000	3454200000	0.0192287	0.0385392	0.0325343	0.645272	2.00425	1.18457	11320000	37214000	28035000	35835000	2634800000	1335600000	1781200000	0.014124	0.0209906	0.0201185	0.304187	1.48616	1.04335	19825000	14028000	52503000	69252000	1584900000	2579400000	2056500000	0.00885103
Phosphoglycerate mutase 1;Probable phosphoglycerate mutase 4	PGAM1;PGAM4		0	0	0	0	3763400000	3519500000	2541400000	0	0	0	0	0	0	0	0	0	0	1650500000	1849700000	3454200000	0	0	0	0	0	0	0	0	2736500	0	2634800000	1335600000	1781200000	0	0.00204889	0	0	∞	∞	960650	0	519290	0	1584900000	2579400000	2056500000	0
Peptidyl-prolyl cis-trans isomerase B	PPIB		2336800	0	0	0	3763400000	3519500000	2541400000	0	0	0	∞	0	0	0	0	23173	0	1650500000	1849700000	3454200000	0	1.2528e-05	0	0	∞	∞	0	3426500	1565600	0	2634800000	1335600000	1781200000	0.00130048	0.00117221	0	0	0.901366	∞	1424300	0	0	1046200	1584900000	2579400000	2056500000	0
Interferon-induced protein with tetratricopeptide repeats 3	IFIT3		0	0	0	0	3763400000	3519500000	2541400000	0	0	0	0	0	0	0	438580	0	0	1650500000	1849700000	3454200000	0.000265726	0	0	0	0	0	0	5517600	0	0	2634800000	1335600000	1781200000	0.00209412	0	0	0	0	0	0	0	6167700	653110	1584900000	2579400000	2056500000	0
Protein SET;Protein SETSIP	SET;SETSIP		919450	0	0	0	3763400000	3519500000	2541400000	0	0	0	∞	0	0	0	0	0	0	1650500000	1849700000	3454200000	0	0	0	0	0	0	0	0	5101000	0	2634800000	1335600000	1781200000	0	0.00381926	0	0	∞	∞	3437400	0	2962500	0	1584900000	2579400000	2056500000	0
DnaJ homolog subfamily C member 10	DNAJC10		2957000	0	956510	0	3763400000	3519500000	2541400000	0	0.000271774	0	∞	∞	∞	0	0	782870	0	1650500000	1849700000	3454200000	0	0.000423242	0	0	∞	∞	0	145520	0	2706100	2634800000	1335600000	1781200000	5.523e-05	0	0.00151926	0	0	0	0	6159600	5842600	4197700	1584900000	2579400000	2056500000	0.00388643
T-complex protein 1 subunit gamma	CCT3		0	40025000	60520000	85022000	3763400000	3519500000	2541400000	0.0106353	0.0171956	0.0334548	0	1.61684	0.513996	0	38284000	90517000	80447000	1650500000	1849700000	3454200000	0.0231954	0.048936	0.0232896	0	2.10973	2.1012	3043900	58618000	72088000	121880000	2634800000	1335600000	1781200000	0.0222476	0.0539742	0.0684258	0.0519277	2.42607	0.7888	5562000	47926000	161490000	144970000	1584900000	2579400000	2056500000	0.0302391
TGF-beta-activated kinase 1 and MAP3K7-binding protein 1	TAB1		39102	0	0	0	3763400000	3519500000	2541400000	0	0	0	∞	0	0	0	0	121250	0	1650500000	1849700000	3454200000	0	6.55512e-05	0	0	∞	∞	0	0	0	0	2634800000	1335600000	1781200000	0	0	0	0	0	0	0	0	0	0	1584900000	2579400000	2056500000	0
Protein POF1B	POF1B		0	0	0	0	3763400000	3519500000	2541400000	0	0	0	0	0	0	0	4835500	0	0	1650500000	1849700000	3454200000	0.00292972	0	0	0	0	0	0	316490	0	0	2634800000	1335600000	1781200000	0.000120119	0	0	0	0	0	0	0	468580	0	1584900000	2579400000	2056500000	0
Tetratricopeptide repeat protein 39B	TTC39B		0	0	0	0	3763400000	3519500000	2541400000	0	0	0	0	0	0	0	0	0	0	1650500000	1849700000	3454200000	0	0	0	0	0	0	0	1843500	0	0	2634800000	1335600000	1781200000	0.000699674	0	0	0	0	0	0	0	1879800	0	1584900000	2579400000	2056500000	0
Calmodulin-like protein 5	CALML5		0	0	0	0	3763400000	3519500000	2541400000	0	0	0	0	0	0	0	0	705990	0	1650500000	1849700000	3454200000	0	0.000381678	0	0	∞	∞	0	0	0	0	2634800000	1335600000	1781200000	0	0	0	0	0	0	0	0	0	6738600	1584900000	2579400000	2056500000	0
Complement component 1 Q subcomponent-binding protein, mitochondrial	C1QBP		77552	0	0	0	3763400000	3519500000	2541400000	0	0	0	∞	0	0	841200	0	0	0	1650500000	1849700000	3454200000	0	0	0	∞	0	0	0	2822600	0	0	2634800000	1335600000	1781200000	0.00107128	0	0	0	0	0	2088400	0	2334100	0	1584900000	2579400000	2056500000	0
Calpain small subunit 1	CAPNS1		0	0	0	0	3763400000	3519500000	2541400000	0	0	0	0	0	0	0	0	0	0	1650500000	1849700000	3454200000	0	0	0	0	0	0	0	1938400	273040	0	2634800000	1335600000	1781200000	0.000735692	0.000204432	0	0	0.277878	∞	2476100	0	0	0	1584900000	2579400000	2056500000	0
Macrophage-capping protein	CAPG		2860900	0	0	0	3763400000	3519500000	2541400000	0	0	0	∞	0	0	0	1031400	0	0	1650500000	1849700000	3454200000	0.000624902	0	0	0	0	0	0	0	0	0	2634800000	1335600000	1781200000	0	0	0	0	0	0	100220	0	0	0	1584900000	2579400000	2056500000	0
Neuroplastin	NPTN		0	0	0	0	3763400000	3519500000	2541400000	0	0	0	0	0	0	0	0	0	0	1650500000	1849700000	3454200000	0	0	0	0	0	0	0	0	237270	0	2634800000	1335600000	1781200000	0	0.00017765	0	0	∞	∞	146610	107140	0	0	1584900000	2579400000	2056500000	6.76005e-05
Ribosome-binding protein 1	RRBP1		0	0	0	0	3763400000	3519500000	2541400000	0	0	0	0	0	0	0	0	0	0	1650500000	1849700000	3454200000	0	0	0	0	0	0	0	0	0	0	2634800000	1335600000	1781200000	0	0	0	0	0	0	483360	0	163190	0	1584900000	2579400000	2056500000	0
3-hydroxyacyl-CoA dehydrogenase type-2	HSD17B10		0	0	0	0	3763400000	3519500000	2541400000	0	0	0	0	0	0	0	2517500	0	788360	1650500000	1849700000	3454200000	0.0015253	0	0.000228232	0	0	0	815980	1780300	624830	0	2634800000	1335600000	1781200000	0.000675687	0.000467827	0	0.458338	0.692373	∞	1618600	181680	653420	301220	1584900000	2579400000	2056500000	0.000114632
40S ribosomal protein S7	RPS7		0	128210	0	0	3763400000	3519500000	2541400000	3.40676e-05	0	0	0	0	0	0	0	402810	0	1650500000	1849700000	3454200000	0	0.00021777	0	0	∞	∞	1941700	1052400	829510	0	2634800000	1335600000	1781200000	0.000399423	0.000621077	0	1.84502	1.55493	∞	545220	708730	500820	604800	1584900000	2579400000	2056500000	0.000447176
Protein S100-P	S100P		0	0	0	0	3763400000	3519500000	2541400000	0	0	0	0	0	0	0	0	0	0	1650500000	1849700000	3454200000	0	0	0	0	0	0	0	274340	0	0	2634800000	1335600000	1781200000	0.000104122	0	0	0	0	0	0	128740	1125200	413510	1584900000	2579400000	2056500000	8.12291e-05
60S ribosomal protein L28	RPL28		0	0	0	0	3763400000	3519500000	2541400000	0	0	0	0	0	0	0	2203700	0	1555700	1650500000	1849700000	3454200000	0.00133517	0	0.000450379	0	0	0	3675100	337680	0	0	2634800000	1335600000	1781200000	0.000128162	0	0	10.8834	0	0	0	737170	0	0	1584900000	2579400000	2056500000	0.000465121
Splicing factor, proline- and glutamine-rich;Non-POU domain-containing octamer-binding protein	SFPQ;NONO		2294600	0	0	0	3763400000	3519500000	2541400000	0	0	0	∞	0	0	0	0	0	0	1650500000	1849700000	3454200000	0	0	0	0	0	0	0	0	0	0	2634800000	1335600000	1781200000	0	0	0	0	0	0	1248800	0	0	0	1584900000	2579400000	2056500000	0
Cytochrome c oxidase subunit 4 isoform 1, mitochondrial	COX4I1		0	0	0	0	3763400000	3519500000	2541400000	0	0	0	0	0	0	0	1087500	0	0	1650500000	1849700000	3454200000	0.000658891	0	0	0	0	0	0	0	0	0	2634800000	1335600000	1781200000	0	0	0	0	0	0	0	0	1073400	0	1584900000	2579400000	2056500000	0
Cytoskeleton-associated protein 4	CKAP4		0	0	0	0	3763400000	3519500000	2541400000	0	0	0	0	0	0	0	884090	0	0	1650500000	1849700000	3454200000	0.00053565	0	0	0	0	0	0	749220	0	0	2634800000	1335600000	1781200000	0.000284356	0	0	0	0	0	498520	0	296880	327820	1584900000	2579400000	2056500000	0
ATPase family AAA domain-containing protein 3C;ATPase family AAA domain-containing protein 3A;ATPase family AAA domain-containing protein 3B	ATAD3C;ATAD3A;ATAD3B		0	0	0	0	3763400000	3519500000	2541400000	0	0	0	0	0	0	0	0	1318400	2240100	1650500000	1849700000	3454200000	0	0.000712764	0.000648515	0	∞	#NAME?	0	0	0	0	2634800000	1335600000	1781200000	0	0	0	0	0	0	551830	0	1906100	1083500	1584900000	2579400000	2056500000	0
Ras-related protein Rab-5C	RAB5C		0	0	0	0	3763400000	3519500000	2541400000	0	0	0	0	0	0	0	0	0	0	1650500000	1849700000	3454200000	0	0	0	0	0	0	0	4562700	0	0	2634800000	1335600000	1781200000	0.00173171	0	0	0	0	0	1137800	0	484660	574660	1584900000	2579400000	2056500000	0
Cytochrome b-c1 complex subunit 2, mitochondrial	UQCRC2		0	0	0	0	3763400000	3519500000	2541400000	0	0	0	0	0	0	0	0	1788900	1747000	1650500000	1849700000	3454200000	0	0.00096713	0.000505761	0	∞	1.91223	0	3491900	857440	2012200	2634800000	1335600000	1781200000	0.0013253	0.000641989	0.00112969	0	0.48441	0.568289	1197600	779510	1412100	869460	1584900000	2579400000	2056500000	0.000491835
Peroxiredoxin-5, mitochondrial	PRDX5		38350	0	0	0	3763400000	3519500000	2541400000	0	0	0	∞	0	0	0	0	0	0	1650500000	1849700000	3454200000	0	0	0	0	0	0	0	1639300	0	0	2634800000	1335600000	1781200000	0.000622172	0	0	0	0	0	0	0	0	0	1584900000	2579400000	2056500000	0
F-actin-capping protein subunit alpha-1	CAPZA1		127670	0	0	0	3763400000	3519500000	2541400000	0	0	0	∞	0	0	0	55095	356090	0	1650500000	1849700000	3454200000	3.33808e-05	0.000192512	0	0	5.76716	∞	0	3400800	0	0	2634800000	1335600000	1781200000	0.00129072	0	0	0	0	0	0	2776100	8586100	14894000	1584900000	2579400000	2056500000	0.00175159
Annexin A3	ANXA3		0	0	0	0	3763400000	3519500000	2541400000	0	0	0	0	0	0	0	1882100	0	0	1650500000	1849700000	3454200000	0.00114032	0	0	0	0	0	0	0	0	0	2634800000	1335600000	1781200000	0	0	0	0	0	0	0	0	457740	0	1584900000	2579400000	2056500000	0
Nascent polypeptide-associated complex subunit alpha;Nascent polypeptide-associated complex subunit alpha, muscle-specific form	NACA		0	0	0	0	3763400000	3519500000	2541400000	0	0	0	0	0	0	0	0	0	0	1650500000	1849700000	3454200000	0	0	0	0	0	0	0	3422200	3991700	0	2634800000	1335600000	1781200000	0.00129885	0.00298869	0	0	2.30104	∞	2487400	0	0	0	1584900000	2579400000	2056500000	0
Ras GTPase-activating protein-binding protein 1	G3BP1		0	0	0	0	3763400000	3519500000	2541400000	0	0	0	0	0	0	0	0	0	0	1650500000	1849700000	3454200000	0	0	0	0	0	0	0	7451100	2115700	0	2634800000	1335600000	1781200000	0.00282796	0.00158408	0	0	0.560151	∞	1703600	718260	3815900	3151900	1584900000	2579400000	2056500000	0.000453189
Galectin-3-binding protein	LGALS3BP		0	0	0	0	3763400000	3519500000	2541400000	0	0	0	0	0	0	0	0	0	1212700	1650500000	1849700000	3454200000	0	0	0.00035108	0	0	0	0	0	2525400	0	2634800000	1335600000	1781200000	0	0.00189084	0	0	∞	∞	643260	0	2294800	0	1584900000	2579400000	2056500000	0
ATP synthase subunit delta, mitochondrial	ATP5D		0	0	0	0	3763400000	3519500000	2541400000	0	0	0	0	0	0	0	601200	1751100	2369300	1650500000	1849700000	3454200000	0.000364253	0.000946694	0.000685919	0	2.599	1.38018	0	9961400	2219400	0	2634800000	1335600000	1781200000	0.0037807	0.00166173	0	0	0.439528	∞	2158400	1393700	3242200	3243700	1584900000	2579400000	2056500000	0.000879361
14-3-3 protein gamma;14-3-3 protein gamma, N-terminally processed	YWHAG		3311300	0	0	0	3763400000	3519500000	2541400000	0	0	0	∞	0	0	0	0	0	0	1650500000	1849700000	3454200000	0	0	0	0	0	0	0	0	1091000	0	2634800000	1335600000	1781200000	0	0.000816861	0	0	∞	∞	666830	0	0	0	1584900000	2579400000	2056500000	0
14-3-3 protein beta/alpha;14-3-3 protein beta/alpha, N-terminally processed	YWHAB		0	0	0	0	3763400000	3519500000	2541400000	0	0	0	0	0	0	0	14963000	2728700	5858100	1650500000	1849700000	3454200000	0.00906574	0.00147521	0.00169594	0	0.162724	0.869852	1180200	1919900	3117900	909910	2634800000	1335600000	1781200000	0.00072867	0.00233446	0.000510841	0.61472	3.20372	4.56983	9516800	1657500	6474800	3575600	1584900000	2579400000	2056500000	0.00104581
Malate dehydrogenase, mitochondrial	MDH2		0	0	0	0	3763400000	3519500000	2541400000	0	0	0	0	0	0	0	0	84380	0	1650500000	1849700000	3454200000	0	4.56182e-05	0	0	∞	∞	0	11143000	4766300	2103900	2634800000	1335600000	1781200000	0.00422916	0.00356866	0.00118117	0	0.843821	3.02129	6796400	393170	5371000	3919300	1584900000	2579400000	2056500000	0.000248072
Tropomyosin alpha-3 chain	TPM3		0	0	0	0	3763400000	3519500000	2541400000	0	0	0	0	0	0	0	0	703900	0	1650500000	1849700000	3454200000	0	0.000380548	0	0	∞	∞	4784400	17193000	2237600	3070000	2634800000	1335600000	1781200000	0.00652535	0.00167535	0.00172356	0.278276	0.256745	0.972032	10103000	9828500	11171000	51198000	1584900000	2579400000	2056500000	0.00620134
Endoplasmin	HSP90B1		2472300	0	0	0	3763400000	3519500000	2541400000	0	0	0	∞	0	0	0	3952300	2347800	0	1650500000	1849700000	3454200000	0.00239461	0.00126929	0	0	0.53006	∞	0	0	3597000	0	2634800000	1335600000	1781200000	0	0.00269317	0	0	∞	∞	3417600	0	0	1712200	1584900000	2579400000	2056500000	0
Tryptophan--tRNA ligase, cytoplasmic;T1-TrpRS;T2-TrpRS	WARS		46095	0	0	0	3763400000	3519500000	2541400000	0	0	0	∞	0	0	0	97912	2120200	1446300	1650500000	1849700000	3454200000	5.93226e-05	0.00114624	0.000418708	0	19.3221	2.73757	0	39692000	19452000	15807000	2634800000	1335600000	1781200000	0.0150645	0.0145642	0.00887435	0	0.966791	1.64116	4402300	9788600	18837000	15866000	1584900000	2579400000	2056500000	0.00617616
Cofilin-1	CFL1		2324100	0	0	0	3763400000	3519500000	2541400000	0	0	0	∞	0	0	30005000	9357500	38184000	609460	1650500000	1849700000	3454200000	0.00566949	0.0206433	0.00017644	3.20652	3.64113	116.999	0	153260000	305820000	153000000	2634800000	1335600000	1781200000	0.0581676	0.228976	0.0858971	0	3.93648	2.6657	10612000	68758000	4337000	162470000	1584900000	2579400000	2056500000	0.0433832
Annexin A5	ANXA5		2328900	0	19892	0	3763400000	3519500000	2541400000	0	5.65194e-06	0	∞	∞	∞	0	0	73723	0	1650500000	1849700000	3454200000	0	3.98567e-05	0	0	∞	∞	1362200	19355000	11031000	2883700	2634800000	1335600000	1781200000	0.00734591	0.00825921	0.00161896	0.0703797	1.12433	5.10154	15019000	0	4837100	7848500	1584900000	2579400000	2056500000	0
Protein-glutamine gamma-glutamyltransferase E;Protein-glutamine gamma-glutamyltransferase E 50 kDa catalytic chain;Protein-glutamine gamma-glutamyltransferase E 27 kDa non-catalytic chain	TGM3		0	0	65401	0	3763400000	3519500000	2541400000	0	1.85825e-05	0	0	∞	∞	0	0	0	0	1650500000	1849700000	3454200000	0	0	0	0	0	0	0	1992700	0	0	2634800000	1335600000	1781200000	0.0007563	0	0	0	0	0	0	0	0	0	1584900000	2579400000	2056500000	0
RNA-binding protein FUS;TATA-binding protein-associated factor 2N	FUS;TAF15		5892900	5155200	70973	0	3763400000	3519500000	2541400000	0.00136983	2.01656e-05	0	1.1431	0.0147213	∞	4017100	0	0	320520	1650500000	1849700000	3454200000	0	0	9.27914e-05	∞	0	0	656810	2450500	2951200	539780	2634800000	1335600000	1781200000	0.000930052	0.00220964	0.000303043	0.268031	2.37583	7.29152	924940	3009800	0	2334200	1584900000	2579400000	2056500000	0.00189905
Heat shock protein beta-1	HSPB1		0	0	75431	0	3763400000	3519500000	2541400000	0	2.14323e-05	0	0	∞	∞	1199200	3806400	4173400	141470	1650500000	1849700000	3454200000	0.00230621	0.00225626	4.09559e-05	0.315048	0.97834	55.0899	1736300	19497000	7113100	6675200	2634800000	1335600000	1781200000	0.0073998	0.00532577	0.00374759	0.0890547	0.719718	1.42112	6871800	1723100	14544000	11293000	1584900000	2579400000	2056500000	0.0010872
Heat shock protein HSP 90-beta	HSP90AB1		0	0	78488	0	3763400000	3519500000	2541400000	0	2.23009e-05	0	0	∞	∞	0	7173700	3227500	78317	1650500000	1849700000	3454200000	0.00434638	0.00174488	2.2673e-05	0	0.401455	76.9585	0	7911700	2208300	1200400	2634800000	1335600000	1781200000	0.00300277	0.00165341	0.000673928	0	0.55063	2.4534	7562500	827810	7058600	8265800	1584900000	2579400000	2056500000	0.000522311
ATP synthase subunit O, mitochondrial	ATP5O		0	0	88647	0	3763400000	3519500000	2541400000	0	2.51874e-05	0	0	∞	∞	0	2684600	1244600	0	1650500000	1849700000	3454200000	0.00162654	0.000672866	0	0	0.41368	∞	0	6380600	2340400	1802000	2634800000	1335600000	1781200000	0.00242166	0.00175232	0.00101168	0	0.723602	1.73209	1310800	0	2167200	2680200	1584900000	2579400000	2056500000	0
40S ribosomal protein S25	RPS25		0	0	317660	0	3763400000	3519500000	2541400000	0	9.02571e-05	0	0	∞	∞	0	2132400	0	0	1650500000	1849700000	3454200000	0.00129197	0	0	0	0	0	0	6235000	2888800	0	2634800000	1335600000	1781200000	0.0023664	0.00216292	0	0	0.914013	∞	1902300	0	0	0	1584900000	2579400000	2056500000	0
60S ribosomal protein L22	RPL22		903950	1438200	700450	0	3763400000	3519500000	2541400000	0.000382154	0.00019902	0	0.628529	0.520784	∞	0	5271900	0	0	1650500000	1849700000	3454200000	0.00319412	0	0	0	0	0	0	15456000	25128000	0	2634800000	1335600000	1781200000	0.0058661	0.018814	0	0	3.20724	∞	0	0	0	0	1584900000	2579400000	2056500000	0
60S ribosomal protein L8	RPL8		0	0	1516500	0	3763400000	3519500000	2541400000	0	0.000430885	0	0	∞	∞	0	0	0	0	1650500000	1849700000	3454200000	0	0	0	0	0	0	0	0	0	0	2634800000	1335600000	1781200000	0	0	0	0	0	0	610410	710230	0	0	1584900000	2579400000	2056500000	0.000448123
Heterogeneous nuclear ribonucleoprotein M	HNRNPM		0	0	1635100	0	3763400000	3519500000	2541400000	0	0.000464583	0	0	∞	∞	0	1537200	0	0	1650500000	1849700000	3454200000	0.000931354	0	0	0	0	0	0	0	0	1748700	2634800000	1335600000	1781200000	0	0	0.000981754	0	0	0	0	0	7915100	16820000	1584900000	2579400000	2056500000	0
40S ribosomal protein S4, X isoform;40S ribosomal protein S4, Y isoform 1	RPS4X;RPS4Y1		201490	806210	2872900	0	3763400000	3519500000	2541400000	0.000214224	0.000816281	0	0.249922	3.81041	∞	1606800	12338000	5617000	12454000	1650500000	1849700000	3454200000	0.00747531	0.00303671	0.00360547	0.130232	0.406232	0.842251	1482900	36775000	13544000	3418700	2634800000	1335600000	1781200000	0.0139574	0.0101408	0.00191932	0.0403236	0.72655	5.28351	10442000	6975900	15033000	16026000	1584900000	2579400000	2056500000	0.00440148
Nucleoside diphosphate kinase B;Nucleoside diphosphate kinase A;Putative nucleoside diphosphate kinase	NME2;NME1;NME2P1		0	0	5989700	0	3763400000	3519500000	2541400000	0	0.00170186	0	0	∞	∞	0	0	0	3203500	1650500000	1849700000	3454200000	0	0	0.000927422	0	0	0	0	38560000	13124000	2871200	2634800000	1335600000	1781200000	0.0146349	0.0098263	0.00161195	0	0.67143	6.09592	14821000	1361600	10543000	8874800	1584900000	2579400000	2056500000	0.000859108
Homer protein homolog 1	HOMER1		0	0	11472000	0	3763400000	3519500000	2541400000	0	0.00325955	0	0	∞	∞	0	0	0	0	1650500000	1849700000	3454200000	0	0	0	0	0	0	28802000	5464600	5004700	0	2634800000	1335600000	1781200000	0.00207401	0.00374715	0	5.27065	1.80672	∞	0	0	0	0	1584900000	2579400000	2056500000	0
Carbonyl reductase [NADPH] 1	CBR1		872160	2336700	845900	43819	3763400000	3519500000	2541400000	0.000620901	0.000240347	1.72421e-05	0.373244	0.387093	13.9395	6135400	5686200	3392500	3468000	1650500000	1849700000	3454200000	0.00344514	0.00183408	0.001004	1.079	0.532368	1.82678	27979000	33781000	47594000	26612000	2634800000	1335600000	1781200000	0.0128211	0.0356349	0.0149405	0.828247	2.7794	2.38512	28283000	28335000	30281000	26286000	1584900000	2579400000	2056500000	0.0178781
Protein odr-4 homolog	ODR4		0	0	45505	64481	3763400000	3519500000	2541400000	0	1.29294e-05	2.53722e-05	0	∞	0.509588	0	0	0	0	1650500000	1849700000	3454200000	0	0	0	0	0	0	0	2687900	4780200	2446400	2634800000	1335600000	1781200000	0.00102015	0.00357907	0.00137346	0	3.50836	2.60588	4670000	2428100	3140600	3259300	1584900000	2579400000	2056500000	0.00153202
ATP synthase subunit gamma, mitochondrial	ATP5C1		454940	0	1120900	99175	3763400000	3519500000	2541400000	0	0.000318483	3.90238e-05	∞	∞	8.16125	0	4198300	3647600	1288900	1650500000	1849700000	3454200000	0.00254365	0.001972	0.00037314	0	0.775261	5.28487	2501700	4490100	5797600	596010	2634800000	1335600000	1781200000	0.00170415	0.00434082	0.000334611	0.557159	2.5472	12.9727	3463400	2466300	10073000	7688300	1584900000	2579400000	2056500000	0.00155612
MOB kinase activator 2	MOB2		406610	0	0	100870	3763400000	3519500000	2541400000	0	0	3.96907e-05	∞	0	0	0	0	0	0	1650500000	1849700000	3454200000	0	0	0	0	0	0	8580700	8754100	10536000	9336800	2634800000	1335600000	1781200000	0.00332249	0.00788859	0.00524186	0.980192	2.3743	1.50492	4585000	9102700	6146200	8924900	1584900000	2579400000	2056500000	0.00574339
Tubulin alpha-4A chain	TUBA4A		0	0	833890	118890	3763400000	3519500000	2541400000	0	0.000236934	4.67813e-05	0	∞	5.06472	0	8203100	0	0	1650500000	1849700000	3454200000	0.00497007	0	0	0	0	0	3892100	3791500	4171900	3404500	2634800000	1335600000	1781200000	0.00143901	0.00312361	0.00191135	1.02653	2.17067	1.63424	4114500	2183700	4143400	5113700	1584900000	2579400000	2056500000	0.00137782
Desmoglein-1	DSG1		0	3416500	8545300	189360	3763400000	3519500000	2541400000	0.000907823	0.00242799	7.45101e-05	0	2.67452	32.586	14561000	10542000	1802200	975600	1650500000	1849700000	3454200000	0.00638716	0.00097432	0.000282439	1.38124	0.152544	3.44967	0	0	637750	1821500	2634800000	1335600000	1781200000	0	0.000477501	0.00102263	0	∞	0.466936	0	0	69642	1998200	1584900000	2579400000	2056500000	0
ADP/ATP translocase 3;ADP/ATP translocase 3, N-terminally processed	SLC25A6		3768300	0	0	439820	3763400000	3519500000	2541400000	0	0	0.000173062	∞	0	0	37563	0	8706400	351080	1650500000	1849700000	3454200000	0	0.00470693	0.000101639	∞	∞	46.3104	4093800	11199000	13712000	13187000	2634800000	1335600000	1781200000	0.00425042	0.0102665	0.00740344	0.36555	2.41542	1.38673	5084000	2980200	22264000	19420000	1584900000	2579400000	2056500000	0.00188037
Thiamine transporter 1	SLC19A2		7477500	1722400	0	504280	3763400000	3519500000	2541400000	0.000457671	0	0.000198426	4.34133	0	0	21021000	6351300	13711000	0	1650500000	1849700000	3454200000	0.00384811	0.00741255	0	3.30972	1.92629	∞	26737000	0	43576000	16823000	2634800000	1335600000	1781200000	0	0.0326265	0.00944476	∞	∞	3.45446	0	0	17093000	11991000	1584900000	2579400000	2056500000	0
Transmembrane protein 33	TMEM33		0	1552200	1417700	659970	3763400000	3519500000	2541400000	0.000412446	0.000402813	0.000259688	0	0.976644	1.55114	0	0	5391000	0	1650500000	1849700000	3454200000	0	0.00291453	0	0	∞	∞	0	2063400	1952300	3094400	2634800000	1335600000	1781200000	0.000783133	0.00146174	0.00173726	0	1.86653	0.841407	1816300	2014900	3641400	2450200	1584900000	2579400000	2056500000	0.00127131
Prohibitin-2	PHB2		0	0	1755300	691290	3763400000	3519500000	2541400000	0	0.000498736	0.000272011	0	∞	1.83351	0	1666000	0	2139700	1650500000	1849700000	3454200000	0.00100939	0	0.000619449	0	0	0	1452200	466980	0	214930	2634800000	1335600000	1781200000	0.000177235	0	0.000120666	3.10977	0	0	273590	247160	490650	325330	1584900000	2579400000	2056500000	0.000155947
40S ribosomal protein S2	RPS2		0	62284	142840	1457800	3763400000	3519500000	2541400000	1.65499e-05	4.05853e-05	0.000573621	0	2.4523	0.0707529	0	2387700	911900	3187500	1650500000	1849700000	3454200000	0.00144665	0.000492999	0.00092279	0	0.340786	0.534248	0	3878700	6495800	1895800	2634800000	1335600000	1781200000	0.0014721	0.00486358	0.00106434	0	3.30383	4.56958	1221100	1151700	2358700	3753500	1584900000	2579400000	2056500000	0.00072667
Junction plakoglobin	JUP		2853300	0	349020	1817600	3763400000	3519500000	2541400000	0	9.91675e-05	0.000715196	∞	∞	0.138658	0	55903000	721450	0	1650500000	1849700000	3454200000	0.0338703	0.000390036	0	0	0.0115156	∞	4576800	10190000	1024200	0	2634800000	1335600000	1781200000	0.00386747	0.000766846	0	0.449146	0.198281	∞	0	0	5880400	788560	1584900000	2579400000	2056500000	0
Annexin A2;Putative annexin A2-like protein	ANXA2;ANXA2P2		30466000	8545300	11934000	4692600	3763400000	3519500000	2541400000	0.00227063	0.00339082	0.00184646	3.56523	1.49334	1.83639	12680000	109480000	84502000	40998000	1650500000	1849700000	3454200000	0.0663314	0.0456842	0.011869	0.11582	0.688726	3.84902	32505000	547670000	327420000	152950000	2634800000	1335600000	1781200000	0.20786	0.245148	0.0858691	0.0593514	1.17939	2.85491	111960000	31194000	157530000	142620000	1584900000	2579400000	2056500000	0.019682
Apoptosis-inducing factor 1, mitochondrial	AIFM1		0	0	0	5010600	3763400000	3519500000	2541400000	0	0	0.00197159	0	0	0	0	0	1578000	4554000	1650500000	1849700000	3454200000	0	0.000853111	0.00131839	0	∞	0.647083	0	0	0	0	2634800000	1335600000	1781200000	0	0	0	0	0	0	3379000	0	4242400	3699700	1584900000	2579400000	2056500000	0
Methylosome subunit pICln	CLNS1A		11621000	843120	3456700	10373000	3763400000	3519500000	2541400000	0.000224031	0.000982157	0.00408161	13.7833	4.38401	0.24063	23158000	11804000	37381000	9815000	1650500000	1849700000	3454200000	0.00715177	0.0202092	0.00284147	1.96188	2.82576	7.11225	57315000	83104000	91358000	68521000	2634800000	1335600000	1781200000	0.0315409	0.0684022	0.038469	0.689678	2.16868	1.77811	40921000	46338000	45065000	48813000	1584900000	2579400000	2056500000	0.0292372
Desmoplakin	DSP		5269300	2165600	5593500	10403000	3763400000	3519500000	2541400000	0.000575437	0.00158929	0.00409341	2.43318	2.76188	0.388255	1009500	68523000	8890300	3553200	1650500000	1849700000	3454200000	0.0415165	0.00480635	0.00102866	0.0147323	0.11577	4.67243	1171100	5261800	0	1534800	2634800000	1335600000	1781200000	0.00199704	0	0.000861666	0.222566	0	0	424760	583420	4883600	698470	1584900000	2579400000	2056500000	0.000368112
Dystrophin	DMD		5051000	38206000	22568000	44420000	3763400000	3519500000	2541400000	0.010152	0.00641227	0.0174786	0.132204	0.631627	0.366865	8620500	3821800	0	46083000	1650500000	1849700000	3454200000	0.00231554	0	0.0133411	2.25561	0	0	0	0	18449000	0	2634800000	1335600000	1781200000	0	0.0138133	0	0	∞	∞	0	0	0	0	1584900000	2579400000	2056500000	0
T-complex protein 1 subunit zeta	CCT6A		0	62310000	84766000	68542000	3763400000	3519500000	2541400000	0.0165568	0.0240847	0.0269702	0	1.45467	0.893011	0	64693000	183080000	268920000	1650500000	1849700000	3454200000	0.039196	0.0989782	0.077853	0	2.52521	1.27135	0	79911000	79638000	114910000	2634800000	1335600000	1781200000	0.0303291	0.0596271	0.0645127	0	1.96601	0.92427	988580	54815000	237440000	234210000	1584900000	2579400000	2056500000	0.0345858
RuvB-like 1	RUVBL1		0	1179000	0	2977000	3763400000	3519500000	2541400000	0.000313281	0	0.0011714	0	0	0	0	1659100	3316900	1427500	1650500000	1849700000	3454200000	0.00100521	0.00179321	0.000413265	0	1.78391	4.33913	3046400	3197500	3160800	927400	2634800000	1335600000	1781200000	0.00121356	0.00236658	0.00052066	0.952744	1.9501	4.54534	3198200	1465500	4274500	2369000	1584900000	2579400000	2056500000	0.000924664
Very-long-chain enoyl-CoA reductase	TECR		0	0	0	0	3763400000	3519500000	2541400000	0	0	0	0	0	0	380550	0	0	0	1650500000	1849700000	3454200000	0	0	0	∞	0	0	0	1420400	1319700	0	2634800000	1335600000	1781200000	0.000539092	0.000988095	0	0	1.83289	∞	1385200	1057200	2652600	2270000	1584900000	2579400000	2056500000	0.000667045
60S ribosomal protein L11	RPL11		0	0	0	1875900	3763400000	3519500000	2541400000	0	0	0.000738136	0	0	0	0	10049000	3177400	4204900	1650500000	1849700000	3454200000	0.00608846	0.00171779	0.00121733	0	0.282139	1.41111	0	5264200	4451100	2866100	2634800000	1335600000	1781200000	0.00199795	0.00333266	0.00160908	0	1.66804	2.07115	2327100	2250200	4765200	4868700	1584900000	2579400000	2056500000	0.00141977
Plasminogen;Plasmin heavy chain A;Activation peptide;Angiostatin;Plasmin heavy chain A, short form;Plasmin light chain B	PLG		2981500	0	0	4439900	3763400000	3519500000	2541400000	0	0	0.00174703	∞	0	0	5670000	5850900	8236700	15026000	1650500000	1849700000	3454200000	0.00354493	0.00445299	0.00435007	0.969082	1.25616	1.02366	4867100	11848000	9616500	7566400	2634800000	1335600000	1781200000	0.00449674	0.00720013	0.00424792	0.410795	1.60119	1.69498	11070000	14384000	12214000	10731000	1584900000	2579400000	2056500000	0.00907565
Protein arginine N-methyltransferase 5;Protein arginine N-methyltransferase 5, N-terminally processed	PRMT5		647070000	700510000	553400000	588770000	3763400000	3519500000	2541400000	0.186138	0.157238	0.231672	0.923713	0.844742	0.678712	1206200000	965840000	832820000	1315500000	1650500000	1849700000	3454200000	0.58518	0.450246	0.380841	1.24886	0.769414	1.18224	3477700000	4309600000	3386900000	3332500000	2634800000	1335600000	1781200000	1.63565	2.53586	1.87093	0.806966	1.55037	1.3554	2474900000	2605100000	2866400000	2852700000	1584900000	2579400000	2056500000	1.6437
Metastasis-associated protein MTA3	MTA3		3809000	3750700	0	2785300	3763400000	3519500000	2541400000	0.000996625	0	0.00109597	1.01554	0	0	0	0	1129500	3743400	1650500000	1849700000	3454200000	0	0.00061064	0.00108372	0	∞	0.563464	0	0	0	0	2634800000	1335600000	1781200000	0	0	0	0	0	0	0	1387900	2720100	2646100	1584900000	2579400000	2056500000	0.000875702
REST corepressor 1	RCOR1		0	4776700	3988900	4239600	3763400000	3519500000	2541400000	0.00126925	0.00113337	0.00166821	0	0.892945	0.679392	0	2781800	4801100	2999200	1650500000	1849700000	3454200000	0.00168543	0.00259561	0.000868276	0	1.54003	2.98938	0	3366400	1260300	1488600	2634800000	1335600000	1781200000	0.00127767	0.000943621	0.000835729	0	0.738549	1.1291	0	1954600	4011200	3440700	1584900000	2579400000	2056500000	0.00123326
Mitochondrial 2-oxoglutarate/malate carrier protein	SLC25A11		0	0	11400000	8999000	3763400000	3519500000	2541400000	0	0.0032391	0.00354096	0	∞	0.914751	582370	0	0	10515000	1650500000	1849700000	3454200000	0	0	0.00304412	∞	0	0	5049700	20574000	19604000	7706600	2634800000	1335600000	1781200000	0.00780856	0.014678	0.00432663	0.245441	1.87974	3.39249	3286200	6047900	13221000	11733000	1584900000	2579400000	2056500000	0.00381595
7-dehydrocholesterol reductase	DHCR7		0	0	0	0	3763400000	3519500000	2541400000	0	0	0	0	0	0	0	0	0	0	1650500000	1849700000	3454200000	0	0	0	0	0	0	0	1852300	1786400	0	2634800000	1335600000	1781200000	0.000703014	0.00133753	0	0	1.90256	∞	0	0	0	0	1584900000	2579400000	2056500000	0
60S ribosomal protein L24	RPL24		623960	0	0	0	3763400000	3519500000	2541400000	0	0	0	∞	0	0	0	0	0	0	1650500000	1849700000	3454200000	0	0	0	0	0	0	2331400	2514900	2547200	1329100	2634800000	1335600000	1781200000	0.000954494	0.00190716	0.000746182	0.927035	1.99808	2.55589	1786700	0	0	4218500	1584900000	2579400000	2056500000	0
Interferon regulatory factor 6	IRF6		0	0	0	0	3763400000	3519500000	2541400000	0	0	0	0	0	0	0	0	0	0	1650500000	1849700000	3454200000	0	0	0	0	0	0	5548100	7193400	4576700	3340000	2634800000	1335600000	1781200000	0.00273015	0.0034267	0.00187514	0.771276	1.25513	1.82744	7091900	5139100	4736100	3416100	1584900000	2579400000	2056500000	0.00324254
GTP-binding nuclear protein Ran	RAN		0	0	0	0	3763400000	3519500000	2541400000	0	0	0	0	0	0	0	0	0	0	1650500000	1849700000	3454200000	0	0	0	0	0	0	0	3731700	2633800	0	2634800000	1335600000	1781200000	0.00141631	0.001972	0	0	1.39235	∞	0	0	0	0	1584900000	2579400000	2056500000	0
Glutathione S-transferase omega-1	GSTO1		0	0	0	0	3763400000	3519500000	2541400000	0	0	0	0	0	0	0	339140	0	0	1650500000	1849700000	3454200000	0.000205477	0	0	0	0	0	3796300	6567000	5503400	0	2634800000	1335600000	1781200000	0.00249241	0.00412055	0	0.578087	1.65324	∞	3080800	2924600	3184700	1261800	1584900000	2579400000	2056500000	0.00184529
Inosine-5-monophosphate dehydrogenase 2	IMPDH2		101150	0	0	0	3763400000	3519500000	2541400000	0	0	0	∞	0	0	0	583790	304620	0	1650500000	1849700000	3454200000	0.000353705	0.000164686	0	0	0.465603	∞	2651800	3432100	2890300	0	2634800000	1335600000	1781200000	0.0013026	0.00216405	0	0.772646	1.66132	∞	2953100	236660	1028200	270880	1584900000	2579400000	2056500000	0.000149322
Thioredoxin	TXN		0	0	0	0	3763400000	3519500000	2541400000	0	0	0	0	0	0	0	12237000	1501600	0	1650500000	1849700000	3454200000	0.00741412	0.000811807	0	0	0.109495	∞	0	7066100	0	9414200	2634800000	1335600000	1781200000	0.00268184	0	0.00528531	0	0	0	4211100	2570600	0	15002000	1584900000	2579400000	2056500000	0.00162193
60S ribosomal protein L13	RPL13		0	1056600	0	0	3763400000	3519500000	2541400000	0.000280757	0	0	0	0	0	0	4168800	1938500	1993600	1650500000	1849700000	3454200000	0.00252578	0.00104801	0.000577152	0	0.414924	1.81582	2213900	5359900	3824100	0	2634800000	1335600000	1781200000	0.00203427	0.00286321	0	0.413049	1.40749	∞	2750700	0	5263000	6718400	1584900000	2579400000	2056500000	0
Macrophage migration inhibitory factor	MIF		0	0	0	0	3763400000	3519500000	2541400000	0	0	0	0	0	0	0	0	0	0	1650500000	1849700000	3454200000	0	0	0	0	0	0	0	7085500	5975800	2858500	2634800000	1335600000	1781200000	0.0026892	0.00447424	0.00160482	0	1.66378	2.78801	4105900	0	2583300	3057000	1584900000	2579400000	2056500000	0
Nuclease-sensitive element-binding protein 1	YBX1		0	0	0	0	3763400000	3519500000	2541400000	0	0	0	0	0	0	0	0	0	0	1650500000	1849700000	3454200000	0	0	0	0	0	0	1573100	7351600	5289300	522140	2634800000	1335600000	1781200000	0.00279019	0.00396024	0.000293139	0.213981	1.41934	13.5098	7088700	1166500	6707000	6822800	1584900000	2579400000	2056500000	0.000736009
40S ribosomal protein S16	RPS16		742660	323060	0	0	3763400000	3519500000	2541400000	8.58426e-05	0	0	2.29883	0	0	0	3629800	2758500	134760	1650500000	1849700000	3454200000	0.00219921	0.00149132	3.90134e-05	0	0.678117	38.2259	1733800	12412000	7489000	2081400	2634800000	1335600000	1781200000	0.00471079	0.00560722	0.00116854	0.139687	1.19029	4.79849	2332100	1692200	8933400	8745900	1584900000	2579400000	2056500000	0.0010677
Histone H2B type 1-L;Histone H2B type 1-M;Histone H2B type 1-N;Histone H2B type 1-H;Histone H2B type 3-B;Histone H2B type 2-F;Histone H2B type 2-E;Histone H2B type 1-C/E/F/G/I;Histone H2B type 1-D;Histone H2B type F-S;Histone H2B type 1-B;Histone H2B type 1-O;Histone H2B type 1-J;Histone H2B type 1-K;Histone H2B type 1-A	HIST1H2BL;HIST1H2BM;HIST1H2BN;HIST1H2BH;HIST3H2BB;HIST2H2BF;HIST2H2BE;HIST1H2BC;HIST1H2BD;H2BFS;HIST1H2BB;HIST1H2BO;HIST1H2BJ;HIST1H2BK;HIST1H2BA		83008	0	0	0	3763400000	3519500000	2541400000	0	0	0	∞	0	0	43537000	27784000	17276000	21601000	1650500000	1849700000	3454200000	0.0168337	0.00933989	0.00625355	1.56698	0.554833	1.49354	2307700	21690000	0	6889000	2634800000	1335600000	1781200000	0.00823212	0	0.00386762	0.106395	0	0	3986000	2988700	25180000	27842000	1584900000	2579400000	2056500000	0.00188573
Tubulin beta-8 chain	TUBB8		0	0	0	0	3763400000	3519500000	2541400000	0	0	0	0	0	0	0	0	0	0	1650500000	1849700000	3454200000	0	0	0	0	0	0	0	8340100	7040100	6771800	2634800000	1335600000	1781200000	0.00316536	0.00527111	0.00380182	0	1.66525	1.38647	5353200	0	12511000	9350900	1584900000	2579400000	2056500000	0
Fascin	FSCN1		0	0	0	0	3763400000	3519500000	2541400000	0	0	0	0	0	0	0	0	0	0	1650500000	1849700000	3454200000	0	0	0	0	0	0	539040	4895900	3070500	936150	2634800000	1335600000	1781200000	0.00185817	0.00229897	0.000525573	0.1101	1.23722	4.37421	1559200	0	1579700	2290200	1584900000	2579400000	2056500000	0
L-lactate dehydrogenase B chain	LDHB		367750	0	0	0	3763400000	3519500000	2541400000	0	0	0	∞	0	0	368860	2108300	2963700	2624100	1650500000	1849700000	3454200000	0.00127737	0.00160226	0.000759684	0.174956	1.25434	2.10911	7428800	19581000	2222900	3088600	2634800000	1335600000	1781200000	0.00743168	0.00166435	0.001734	0.379388	0.223953	0.95983	12141000	390980	6186900	4917400	1584900000	2579400000	2056500000	0.000246691
Elongation factor 2	EEF2		1412100	0	0	0	3763400000	3519500000	2541400000	0	0	0	∞	0	0	979740	6408900	1540000	0	1650500000	1849700000	3454200000	0.00388301	0.000832567	0	0.152872	0.214413	∞	0	1687300	1135100	0	2634800000	1335600000	1781200000	0.00064039	0.00084988	0	0	1.32713	∞	13012000	0	4201100	2443300	1584900000	2579400000	2056500000	0
Triosephosphate isomerase	TPI1		10636000	0	0	0	3763400000	3519500000	2541400000	0	0	0	∞	0	0	3855100	8823000	1664300	622470	1650500000	1849700000	3454200000	0.00534565	0.000899768	0.000180207	0.436938	0.168318	4.99297	476880	26055000	17600000	5528300	2634800000	1335600000	1781200000	0.0098888	0.0131776	0.00310369	0.0183028	1.33258	4.24578	16619000	1253700	8227100	4613800	1584900000	2579400000	2056500000	0.000791028
Calmodulin	CALM1		0	0	0	0	3763400000	3519500000	2541400000	0	0	0	0	0	0	0	692650	555970	2904400	1650500000	1849700000	3454200000	0.000419661	0.000300573	0.000840831	0	0.716229	0.357471	0	20689000	14659000	13337000	2634800000	1335600000	1781200000	0.00785221	0.0109756	0.00748765	0	1.39777	1.46583	9361000	9503000	16579000	34719000	1584900000	2579400000	2056500000	0.00599596
Small nuclear ribonucleoprotein Sm D1	SNRPD1		397520	0	0	0	3763400000	3519500000	2541400000	0	0	0	∞	0	0	5755700	10349000	3768700	5262600	1650500000	1849700000	3454200000	0.00627022	0.00203747	0.00152354	0.55616	0.324943	1.33733	20829000	55897000	47888000	29812000	2634800000	1335600000	1781200000	0.0212149	0.035855	0.016737	0.372632	1.69009	2.14226	4724100	29001000	30036000	42279000	1584900000	2579400000	2056500000	0.0182983
Glutathione S-transferase P	GSTP1		3524400	0	0	0	3763400000	3519500000	2541400000	0	0	0	∞	0	0	1805000	3110200	4452800	175600	1650500000	1849700000	3454200000	0.0018844	0.00240731	5.08367e-05	0.580349	1.27749	47.3538	52355000	138070000	58061000	50553000	2634800000	1335600000	1781200000	0.0524025	0.0434718	0.0283814	0.379192	0.829576	1.5317	57184000	19751000	41662000	46034000	1584900000	2579400000	2056500000	0.012462
Phosphoglycerate kinase 1	PGK1		4660100	1466000	49426	0	3763400000	3519500000	2541400000	0.000389541	1.40435e-05	0	3.17879	0.0360513	∞	78524	14844000	1928200	1216600	1650500000	1849700000	3454200000	0.00899364	0.00104244	0.000352209	0.00528995	0.115909	2.95972	5203100	25751000	15716000	4110200	2634800000	1335600000	1781200000	0.00977342	0.011767	0.00230755	0.202054	1.20398	5.09936	19933000	155400	5485500	8866100	1584900000	2579400000	2056500000	9.80504e-05
Galectin-1	LGALS1		1745900	403630	1147700	0	3763400000	3519500000	2541400000	0.000107251	0.000326097	0	4.3255	3.0405	∞	0	1990500	2433900	0	1650500000	1849700000	3454200000	0.001206	0.00131584	0	0	1.09108	∞	29286000	35731000	29714000	20836000	2634800000	1335600000	1781200000	0.0135612	0.0222477	0.0116977	0.819624	1.64054	1.90188	15471000	11165000	16342000	17302000	1584900000	2579400000	2056500000	0.00704461
Major vault protein	MVP		62807	1310100	2054500	0	3763400000	3519500000	2541400000	0.000348116	0.000583748	0	0.0479406	1.67688	∞	3139000	0	0	0	1650500000	1849700000	3454200000	0	0	0	∞	0	0	0	0	0	0	2634800000	1335600000	1781200000	0	0	0	0	0	0	0	0	0	0	1584900000	2579400000	2056500000	0
Heat shock protein HSP 90-alpha	HSP90AA1		10214000	3419700	2563100	0	3763400000	3519500000	2541400000	0.000908673	0.000728257	0	2.98681	0.801451	∞	11238000	42504000	16740000	7300500	1650500000	1849700000	3454200000	0.0257522	0.00905012	0.00211351	0.264399	0.351431	4.28202	8498800	45998000	39746000	19663000	2634800000	1335600000	1781200000	0.0174579	0.0297589	0.0110392	0.184765	1.70461	2.69575	65181000	7252800	33284000	32734000	1584900000	2579400000	2056500000	0.00457619
14-3-3 protein sigma	SFN		5042100	0	2926400	64880	3763400000	3519500000	2541400000	0	0.000831482	2.55292e-05	∞	∞	32.5698	12067000	146290000	905190	2453100	1650500000	1849700000	3454200000	0.0886337	0.000489371	0.000710179	0.0824868	0.00552127	0.689082	3027900	60855000	51430000	9784900	2634800000	1335600000	1781200000	0.0230966	0.038507	0.00549343	0.049756	1.66721	7.00965	53134000	7335500	9392700	32588000	1584900000	2579400000	2056500000	0.00462837
Myosin regulatory light chain 12A;Myosin regulatory light polypeptide 9	MYL12A;MYL9		204840	0	1078900	545210	3763400000	3519500000	2541400000	0	0.000306549	0.000214531	∞	∞	1.42893	1096200	70075000	2520500	7558800	1650500000	1849700000	3454200000	0.0424568	0.00136265	0.00218829	0.0156432	0.032095	0.622702	105650000	231860000	161580000	183110000	2634800000	1335600000	1781200000	0.0879991	0.120979	0.102801	0.455663	1.37478	1.17682	191190000	174140000	311090000	1182700000	1584900000	2579400000	2056500000	0.109874
SUN domain-containing protein 2	SUN2		0	0	0	1186200	3763400000	3519500000	2541400000	0	0	0.000466751	0	0	0	0	466270	920230	1072600	1650500000	1849700000	3454200000	0.000282502	0.000497502	0.000310521	0	1.76106	1.60216	13909000	1872700	1317400	1291200	2634800000	1335600000	1781200000	0.000710756	0.000986373	0.000724905	7.42724	1.38778	1.36069	3751700	2116300	1069400	1806500	1584900000	2579400000	2056500000	0.00133529
Serine/threonine-protein kinase 38-like	STK38L		4816000	2260600	95880	1551200	3763400000	3519500000	2541400000	0.00060068	2.72425e-05	0.000610372	2.13041	0.0453528	0.0446326	9470100	6422000	8249400	12203000	1650500000	1849700000	3454200000	0.00389094	0.00445986	0.0035328	1.47463	1.14622	1.26241	45265000	61622000	53064000	24543000	2634800000	1335600000	1781200000	0.0233877	0.0397305	0.0137789	0.734559	1.69877	2.88342	38289000	42534000	34000000	42362000	1584900000	2579400000	2056500000	0.026837
Heterogeneous nuclear ribonucleoprotein K	HNRNPK		5879900	2900500	79971	1638500	3763400000	3519500000	2541400000	0.000770713	2.27223e-05	0.000644723	2.0272	0.0294821	0.0352434	2862000	17117000	3175000	4937600	1650500000	1849700000	3454200000	0.0103708	0.00171649	0.00142945	0.167202	0.165512	1.20081	10665000	24593000	16745000	3507600	2634800000	1335600000	1781200000	0.00933392	0.0125374	0.00196923	0.43366	1.34321	6.36666	9249700	6790000	9056500	11887000	1584900000	2579400000	2056500000	0.00428418
Methylosome protein 50	WDR77		9509900	0	2390000	2172500	3763400000	3519500000	2541400000	0	0.000679074	0.000854844	∞	∞	0.794383	146930000	297060000	129780000	123370000	1650500000	1849700000	3454200000	0.179982	0.0701627	0.0357159	0.494614	0.389832	1.96447	1402500000	1590700000	1280100000	1537800000	2634800000	1335600000	1781200000	0.603727	0.958446	0.863351	0.881687	1.58755	1.11015	548560000	611570000	726850000	778730000	1584900000	2579400000	2056500000	0.385873
Lysine-specific histone demethylase 1A	KDM1A		0	59117	358910	2487500	3763400000	3519500000	2541400000	1.57084e-05	0.000101978	0.000978791	0	6.49191	0.104187	0	2825900	5119500	3418700	1650500000	1849700000	3454200000	0.00171215	0.00276775	0.000989723	0	1.61653	2.79649	65344000	8612700	2403600	4183700	2634800000	1335600000	1781200000	0.00326882	0.00179964	0.00234881	7.58694	0.550547	0.766193	24356000	17324000	7765400	4165400	1584900000	2579400000	2056500000	0.0109307
Histone H2A type 1-J;Histone H2A type 1-H;Histone H2A.J;Histone H2A type 1-C;Histone H2A type 3;Histone H2A type 1-D;Histone H2A type 1;Histone H2A type 1-B/E;Histone H2AX;Histone H2A type 2-B	HIST1H2AJ;HIST1H2AH;H2AFJ;HIST1H2AC;HIST3H2A;HIST1H2AD;HIST1H2AG;HIST1H2AB;H2AFX;HIST2H2AB		982460	170820	1308400	3089900	3763400000	3519500000	2541400000	4.53898e-05	0.000371757	0.00121583	5.75143	8.19033	0.305765	23164000	27885000	24051000	36315000	1650500000	1849700000	3454200000	0.0168949	0.0130026	0.0105133	0.830698	0.769621	1.23678	0	12086000	6312000	12888000	2634800000	1335600000	1781200000	0.00458707	0.00472597	0.00723557	0	1.03028	0.653157	0	5233000	25236000	36126000	1584900000	2579400000	2056500000	0.00330179
ATP synthase subunit alpha, mitochondrial	ATP5A1		3362400	0	2233900	4154500	3763400000	3519500000	2541400000	0	0.000634721	0.00163473	∞	∞	0.388273	7715100	22212000	23195000	26400000	1650500000	1849700000	3454200000	0.0134577	0.0125399	0.00764287	0.347339	0.931796	1.64073	29548000	65435000	58603000	27218000	2634800000	1335600000	1781200000	0.0248349	0.0438777	0.0152807	0.451563	1.76677	2.87144	59320000	19387000	61348000	38366000	1584900000	2579400000	2056500000	0.0122323
Histone H3.2;Histone H3.1t;Histone H3.3;Histone H3.1;Histone H3.3C	HIST2H3A;HIST3H3;H3F3A;HIST1H3A;H3F3C		285040	2154800	2255700	4432000	3763400000	3519500000	2541400000	0.000572567	0.000640915	0.00174392	0.132281	1.11937	0.367514	22053000	32245000	6867300	14022000	1650500000	1849700000	3454200000	0.0195365	0.00371266	0.00405941	0.68392	0.190037	0.914581	0	0	0	0	2634800000	1335600000	1781200000	0	0	0	0	0	0	0	1476300	5991300	9788800	1584900000	2579400000	2056500000	0.000931478
Tubulin beta chain	TUBB		3939700	1952200	15563000	4850500	3763400000	3519500000	2541400000	0.000518733	0.00442193	0.00190859	2.01808	8.52449	2.31686	12160000	5118400	50094000	28088000	1650500000	1849700000	3454200000	0.00310112	0.0270822	0.00813155	2.37574	8.73305	3.33051	50750000	68007000	59623000	47575000	2634800000	1335600000	1781200000	0.0258111	0.0446414	0.0267095	0.746247	1.72954	1.67137	44022000	39043000	76197000	82740000	1584900000	2579400000	2056500000	0.0246344
60 kDa heat shock protein, mitochondrial	HSPD1		21501000	12703000	6195600	5133500	3763400000	3519500000	2541400000	0.00337541	0.00176036	0.00201995	1.69259	0.521527	0.871489	3631100	16142000	22213000	10287000	1650500000	1849700000	3454200000	0.00978007	0.012009	0.00297811	0.224947	1.2279	4.03241	4963300	89418000	39520000	15428000	2634800000	1335600000	1781200000	0.0339373	0.0295897	0.00866158	0.0555067	0.871893	3.4162	36049000	913920	26022000	26563000	1584900000	2579400000	2056500000	0.000576642
C-Myc-binding protein	MYCBP		11286000	0	9580200	7116700	3763400000	3519500000	2541400000	0	0.00272203	0.00280031	∞	∞	0.972049	15646000	3371000	16821000	8213500	1650500000	1849700000	3454200000	0.00204241	0.00909391	0.00237783	4.64135	4.45253	3.82446	0	10243000	0	2232700	2634800000	1335600000	1781200000	0.00388758	0	0.00125348	0	0	0	5751100	14869000	20702000	22799000	1584900000	2579400000	2056500000	0.00938166
40S ribosomal protein S18	RPS18		18776000	15912000	15780000	8585200	3763400000	3519500000	2541400000	0.00422809	0.00448359	0.00337814	1.17999	1.06043	1.32724	20941000	52320000	46366000	20522000	1650500000	1849700000	3454200000	0.0316995	0.0250668	0.00594117	0.400248	0.790763	4.21916	32367000	22035000	55026000	39736000	2634800000	1335600000	1781200000	0.00836306	0.0411995	0.0223086	1.46889	4.92636	1.8468	16522000	20538000	33231000	19816000	1584900000	2579400000	2056500000	0.0129585
Stress-70 protein, mitochondrial	HSPA9		13557000	55442	16422000	9323600	3763400000	3519500000	2541400000	1.47319e-05	0.004666	0.00366869	244.526	316.728	1.27185	2952000	6501100	11122000	18625000	1650500000	1849700000	3454200000	0.00393887	0.00601287	0.00539199	0.454077	1.52655	1.11515	8309400	23676000	13613000	24953000	2634800000	1335600000	1781200000	0.00898588	0.0101924	0.0140091	0.350963	1.13427	0.727558	35347000	10614000	29494000	24260000	1584900000	2579400000	2056500000	0.00669695
Peroxiredoxin-1	PRDX1		104650000	18054000	23164000	12433000	3763400000	3519500000	2541400000	0.00479726	0.00658162	0.00489219	5.7965	1.37195	1.34533	61590000	69774000	38366000	40183000	1650500000	1849700000	3454200000	0.0422745	0.0207417	0.0116331	0.882707	0.490645	1.783	142880000	223830000	183860000	106270000	2634800000	1335600000	1781200000	0.0849514	0.137661	0.059662	0.638342	1.62047	2.30735	173010000	115460000	107130000	118660000	1584900000	2579400000	2056500000	0.07285
Tubulin alpha-1B chain	TUBA1B		24664000	16060000	83226000	19080000	3763400000	3519500000	2541400000	0.00426742	0.0236471	0.00750767	1.53574	5.54132	3.14973	81417000	186380000	265310000	267010000	1650500000	1849700000	3454200000	0.112923	0.143434	0.0773001	0.436833	1.27019	1.85555	385910000	353490000	341870000	355250000	2634800000	1335600000	1781200000	0.134162	0.255967	0.199444	1.09171	1.9079	1.2834	457780000	293230000	632820000	513690000	1584900000	2579400000	2056500000	0.185015
Tubulin beta-4B chain	TUBB4B		54855000	32736000	131170000	62696000	3763400000	3519500000	2541400000	0.00869852	0.0372695	0.0246699	1.67568	4.28458	1.51073	36041000	138300000	174660000	136020000	1650500000	1849700000	3454200000	0.0837928	0.0944261	0.0393781	0.2606	1.1269	2.39793	309460000	339270000	295680000	310190000	2634800000	1335600000	1781200000	0.128765	0.221384	0.174147	0.912135	1.71928	1.27125	271280000	206700000	412820000	418960000	1584900000	2579400000	2056500000	0.130418
Keratin, type II cytoskeletal 2 epidermal	KRT2		2129000000	1690500000	2783200000	1786700000	3763400000	3519500000	2541400000	0.449195	0.790794	0.703038	1.25939	1.76047	1.12482	1350300000	4160700000	1422600000	1513000000	1650500000	1849700000	3454200000	2.52087	0.769098	0.438017	0.324537	0.305092	1.75586	1201800000	1689500000	726330000	343420000	2634800000	1335600000	1781200000	0.641225	0.543823	0.192803	0.711335	0.8481	2.82062	372260000	845450000	2619900000	1259000000	1584900000	2579400000	2056500000	0.533441
Ig kappa chain V-II region TEW;Ig kappa chain V-II region Cum;Ig kappa chain V-II region GM607;Ig kappa chain V-II region RPMI 6410			6902200000	3773500000	19001000000	11680000000	3763400000	3519500000	2541400000	1.00268	5.39878	4.59589	1.82912	5.38433	1.1747	24211000000	8442500000	5717200000	16380000000	1650500000	1849700000	3454200000	5.11512	3.09088	4.74205	2.86775	0.604264	0.651802	41718000000	52123000000	49601000000	43788000000	2634800000	1335600000	1781200000	19.7825	37.1376	24.5834	0.800376	1.87729	1.51068	37726000000	44752000000	44217000000	51125000000	1584900000	2579400000	2056500000	28.2365
Protein S100-A11;Protein S100-A11, N-terminally processed	S100A11		0	0	0	0	3763400000	3519500000	2541400000	0	0	0	0	0	0	0	1743300	0	0	1650500000	1849700000	3454200000	0.00105623	0	0	0	0	0	0	0	0	0	2634800000	1335600000	1781200000	0	0	0	0	0	0	0	0	0	0	1584900000	2579400000	2056500000	0
Mitochondrial import inner membrane translocase subunit TIM50	TIMM50		0	0	0	0	3763400000	3519500000	2541400000	0	0	0	0	0	0	0	0	0	2096800	1650500000	1849700000	3454200000	0	0	0.000607029	0	0	0	709450	0	648160	0	2634800000	1335600000	1781200000	0	0.000485295	0	∞	∞	∞	485190	377670	664940	483920	1584900000	2579400000	2056500000	0.000238293
Laminin subunit beta-3	LAMB3		0	0	0	0	3763400000	3519500000	2541400000	0	0	0	0	0	0	0	922040	0	0	1650500000	1849700000	3454200000	0.000558643	0	0	0	0	0	0	0	0	0	2634800000	1335600000	1781200000	0	0	0	0	0	0	0	0	0	0	1584900000	2579400000	2056500000	0
Heterogeneous nuclear ribonucleoprotein D0;Heterogeneous nuclear ribonucleoprotein D-like	HNRNPD;HNRNPDL		0	0	0	0	3763400000	3519500000	2541400000	0	0	0	0	0	0	0	0	0	0	1650500000	1849700000	3454200000	0	0	0	0	0	0	0	13363000	2203400	0	2634800000	1335600000	1781200000	0.00507173	0.00164975	0	0	0.325282	∞	0	0	0	2400600	1584900000	2579400000	2056500000	0
Myosin light chain 1/3, skeletal muscle isoform;Myosin light chain 3	MYL1;MYL3		0	0	0	0	3763400000	3519500000	2541400000	0	0	0	0	0	0	0	15708000	1487500	1451500	1650500000	1849700000	3454200000	0.00951712	0.000804184	0.000420213	0	0.0844988	1.91375	0	0	0	0	2634800000	1335600000	1781200000	0	0	0	0	0	0	10885000	22267000	20578000	85085000	1584900000	2579400000	2056500000	0.0140495
Ubiquitin-like protein ISG15	ISG15		0	12069000	3876900	23543000	3763400000	3519500000	2541400000	0.00320694	0.00110155	0.00926379	0	0.343489	0.118909	0	16425000	14837000	15221000	1650500000	1849700000	3454200000	0.00995153	0.0080213	0.00440652	0	0.806037	1.82033	0	25826000	10341000	23042000	2634800000	1335600000	1781200000	0.00980188	0.00774259	0.0129362	0	0.789908	0.59852	761210	14479000	20854000	12267000	1584900000	2579400000	2056500000	0.00913559
Cathepsin B;Cathepsin B light chain;Cathepsin B heavy chain	CTSB		4926300	5449900	39217000	29789000	3763400000	3519500000	2541400000	0.00144813	0.0111428	0.0117215	0.903925	7.69459	0.950628	0	14158000	13085000	14927000	1650500000	1849700000	3454200000	0.00857801	0.00707412	0.00432141	0	0.824681	1.637	10347000	14251000	5813900	3061600	2634800000	1335600000	1781200000	0.00540876	0.00435302	0.00171884	0.726054	0.80481	2.53253	6168500	14549000	20524000	26886000	1584900000	2579400000	2056500000	0.00917976
Mesoderm induction early response protein 1	MIER1		142500000	138900000	177730000	32379000	3763400000	3519500000	2541400000	0.0369081	0.0504987	0.0127406	1.02592	1.36823	3.9636	321000000	96629000	16233000	99548000	1650500000	1849700000	3454200000	0.0585453	0.00877602	0.0288194	3.32198	0.149901	0.304518	45326000	0	0	0	2634800000	1335600000	1781200000	0	0	0	∞	0	0	7984800	45166000	24945000	15859000	1584900000	2579400000	2056500000	0.0284977
OTU domain-containing protein 4	OTUD4		134640000	72389000	108680000	58119000	3763400000	3519500000	2541400000	0.019235	0.0308794	0.0228689	1.85995	1.60537	1.35028	138700000	66243000	121940000	77893000	1650500000	1849700000	3454200000	0.0401351	0.0659242	0.0225502	2.09381	1.64256	2.92344	449270	98008	353860	1279500	2634800000	1335600000	1781200000	3.71975e-05	0.000264945	0.000718336	4.58401	7.12264	0.368831	340720	5817500	123530	646740	1584900000	2579400000	2056500000	0.00367058
Ig gamma-2 chain C region	IGHG2		114580000	83603000	126250000	337140000	3763400000	3519500000	2541400000	0.0222148	0.0358716	0.132659	1.37052	1.61476	0.270404	136850000	144620000	85015000	206240000	1650500000	1849700000	3454200000	0.0876219	0.0459615	0.059707	0.946273	0.524543	0.769784	278650000	324770000	0	205880000	2634800000	1335600000	1781200000	0.123262	0	0.115585	0.857992	0	0	201560000	236940000	312780000	348060000	1584900000	2579400000	2056500000	0.149498
A-kinase anchor protein 8	AKAP8		0	0	0	0	3763400000	3519500000	2541400000	0	0	0	0	0	0	0	0	0	0	1650500000	1849700000	3454200000	0	0	0	0	0	0	0	0	0	0	2634800000	1335600000	1781200000	0	0	0	0	0	0	0	0	0	0	1584900000	2579400000	2056500000	0
Zyxin	ZYX		0	0	0	0	3763400000	3519500000	2541400000	0	0	0	0	0	0	0	0	0	0	1650500000	1849700000	3454200000	0	0	0	0	0	0	0	0	0	0	2634800000	1335600000	1781200000	0	0	0	0	0	0	0	0	0	0	1584900000	2579400000	2056500000	0
Serpin B12	SERPINB12		0	0	0	0	3763400000	3519500000	2541400000	0	0	0	0	0	0	0	0	0	0	1650500000	1849700000	3454200000	0	0	0	0	0	0	0	0	0	0	2634800000	1335600000	1781200000	0	0	0	0	0	0	0	0	0	0	1584900000	2579400000	2056500000	0
Filamin-A	FLNA		0	0	0	0	3763400000	3519500000	2541400000	0	0	0	0	0	0	0	1696600	0	0	1650500000	1849700000	3454200000	0.00102793	0	0	0	0	0	0	0	0	0	2634800000	1335600000	1781200000	0	0	0	0	0	0	0	0	0	0	1584900000	2579400000	2056500000	0
Ig heavy chain V-III region VH26			0	0	0	0	3763400000	3519500000	2541400000	0	0	0	0	0	0	0	2101800	0	0	1650500000	1849700000	3454200000	0.00127343	0	0	0	0	0	0	0	0	0	2634800000	1335600000	1781200000	0	0	0	0	0	0	0	0	0	0	1584900000	2579400000	2056500000	0
Gasdermin-A	GSDMA		0	0	0	0	3763400000	3519500000	2541400000	0	0	0	0	0	0	0	3804900	0	0	1650500000	1849700000	3454200000	0.0023053	0	0	0	0	0	0	0	0	0	2634800000	1335600000	1781200000	0	0	0	0	0	0	0	0	0	0	1584900000	2579400000	2056500000	0
Cellular retinoic acid-binding protein 2	CRABP2		0	0	0	0	3763400000	3519500000	2541400000	0	0	0	0	0	0	0	4352700	0	0	1650500000	1849700000	3454200000	0.0026372	0	0	0	0	0	0	0	0	0	2634800000	1335600000	1781200000	0	0	0	0	0	0	0	0	0	0	1584900000	2579400000	2056500000	0
Ig gamma-1 chain C region;Ig gamma-4 chain C region;Ig gamma-3 chain C region	IGHG1;IGHG4;IGHG3		0	0	0	0	3763400000	3519500000	2541400000	0	0	0	0	0	0	0	10025000	0	0	1650500000	1849700000	3454200000	0.00607392	0	0	0	0	0	0	0	0	0	2634800000	1335600000	1781200000	0	0	0	0	0	0	0	0	0	0	1584900000	2579400000	2056500000	0
Epiplakin	EPPK1		70078	0	0	0	3763400000	3519500000	2541400000	0	0	0	∞	0	0	2358800	17267000	0	0	1650500000	1849700000	3454200000	0.0104617	0	0	0.136607	0	0	0	0	0	0	2634800000	1335600000	1781200000	0	0	0	0	0	0	0	0	0	0	1584900000	2579400000	2056500000	0
Lamin-B1	LMNB1		0	0	0	0	3763400000	3519500000	2541400000	0	0	0	0	0	0	0	1439900	0	797620	1650500000	1849700000	3454200000	0.000872402	0	0.000230913	0	0	0	0	0	0	0	2634800000	1335600000	1781200000	0	0	0	0	0	0	0	0	0	0	1584900000	2579400000	2056500000	0
ADP-ribosylation factor 5;ADP-ribosylation factor 1;ADP-ribosylation factor 3	ARF5;ARF1;ARF3		96547	0	0	0	3763400000	3519500000	2541400000	0	0	0	∞	0	0	0	974570	0	0	1650500000	1849700000	3454200000	0.00059047	0	0	0	0	0	0	2568800	0	0	2634800000	1335600000	1781200000	0.000974951	0	0	0	0	0	0	0	0	0	1584900000	2579400000	2056500000	0
Calmodulin-like protein 3	CALML3		0	0	0	0	3763400000	3519500000	2541400000	0	0	0	0	0	0	0	932040	0	0	1650500000	1849700000	3454200000	0.000564702	0	0	0	0	0	0	0	0	2383800	2634800000	1335600000	1781200000	0	0	0.00133831	0	0	0	0	0	0	0	1584900000	2579400000	2056500000	0
Protein S100-A2	S100A2		0	0	0	0	3763400000	3519500000	2541400000	0	0	0	0	0	0	0	0	0	0	1650500000	1849700000	3454200000	0	0	0	0	0	0	350430	0	0	0	2634800000	1335600000	1781200000	0	0	0	∞	0	0	176970	0	128130	0	1584900000	2579400000	2056500000	0
Caveolin-1	CAV1		0	0	0	0	3763400000	3519500000	2541400000	0	0	0	0	0	0	0	0	0	0	1650500000	1849700000	3454200000	0	0	0	0	0	0	41740000	4708600	5333700	3138200	2634800000	1335600000	1781200000	0.00178708	0.00399349	0.00176185	8.86463	2.23464	2.26665	7046100	0	1221300	0	1584900000	2579400000	2056500000	0
Myosin-10	MYH10		0	0	0	0	3763400000	3519500000	2541400000	0	0	0	0	0	0	0	0	0	0	1650500000	1849700000	3454200000	0	0	0	0	0	0	0	0	0	0	2634800000	1335600000	1781200000	0	0	0	0	0	0	38117	0	0	90254	1584900000	2579400000	2056500000	0
Heterogeneous nuclear ribonucleoprotein C-like 1;Heterogeneous nuclear ribonucleoprotein C-like 2;Heterogeneous nuclear ribonucleoproteins C1/C2	LOC649330;HNRNPCL1;HNRNPCL2;HNRNPC		0	0	0	0	3763400000	3519500000	2541400000	0	0	0	0	0	0	0	813010	0	0	1650500000	1849700000	3454200000	0.000492584	0	0	0	0	0	0	0	0	0	2634800000	1335600000	1781200000	0	0	0	0	0	0	0	0	0	1045800	1584900000	2579400000	2056500000	0
Galectin-7	LGALS7		0	0	0	0	3763400000	3519500000	2541400000	0	0	0	0	0	0	0	141920000	0	0	1650500000	1849700000	3454200000	0.0859861	0	0	0	0	0	0	9860100	1348400	0	2634800000	1335600000	1781200000	0.00374226	0.00100958	0	0	0.269779	∞	1362500	0	0	1558300	1584900000	2579400000	2056500000	0
Suprabasin	SBSN		0	0	0	0	3763400000	3519500000	2541400000	0	0	0	0	0	0	0	0	0	0	1650500000	1849700000	3454200000	0	0	0	0	0	0	2791100	0	0	0	2634800000	1335600000	1781200000	0	0	0	∞	0	0	0	0	0	0	1584900000	2579400000	2056500000	0
Hydroxyacylglutathione hydrolase, mitochondrial	HAGH		0	0	0	0	3763400000	3519500000	2541400000	0	0	0	0	0	0	0	0	0	0	1650500000	1849700000	3454200000	0	0	0	0	0	0	1766900	0	0	207070	2634800000	1335600000	1781200000	0	0	0.000116253	∞	0	0	1057200	695400	376350	0	1584900000	2579400000	2056500000	0.000438766
Myosin regulatory light chain 12B	MYL12B		0	0	0	0	3763400000	3519500000	2541400000	0	0	0	0	0	0	0	0	0	0	1650500000	1849700000	3454200000	0	0	0	0	0	0	0	0	0	0	2634800000	1335600000	1781200000	0	0	0	0	0	0	4935800	6775400	8814400	36886000	1584900000	2579400000	2056500000	0.00427497
RNA-binding protein EWS	EWSR1		0	0	0	0	3763400000	3519500000	2541400000	0	0	0	0	0	0	0	0	0	0	1650500000	1849700000	3454200000	0	0	0	0	0	0	0	3434400	0	0	2634800000	1335600000	1781200000	0.00130348	0	0	0	0	0	0	0	0	816850	1584900000	2579400000	2056500000	0
Olfactory receptor 3A2;Olfactory receptor 3A3	OR3A2;OR3A3		0	0	0	0	3763400000	3519500000	2541400000	0	0	0	0	0	0	0	0	0	0	1650500000	1849700000	3454200000	0	0	0	0	0	0	10817000	40244000	16703000	14258000	2634800000	1335600000	1781200000	0.015274	0.012506	0.00800472	0.268785	0.818775	1.56233	41603000	21886000	18259000	5468400	1584900000	2579400000	2056500000	0.0138091
Partner of Y14 and mago	WIBG		0	0	0	0	3763400000	3519500000	2541400000	0	0	0	0	0	0	0	0	0	0	1650500000	1849700000	3454200000	0	0	0	0	0	0	0	0	0	0	2634800000	1335600000	1781200000	0	0	0	0	0	0	137870	0	0	74626	1584900000	2579400000	2056500000	0
Ubiquitin-associated protein 2-like	UBAP2L		0	0	0	0	3763400000	3519500000	2541400000	0	0	0	0	0	0	0	0	0	0	1650500000	1849700000	3454200000	0	0	0	0	0	0	0	0	0	0	2634800000	1335600000	1781200000	0	0	0	0	0	0	0	0	0	0	1584900000	2579400000	2056500000	0
Synaptic vesicle membrane protein VAT-1 homolog	VAT1		0	0	0	0	3763400000	3519500000	2541400000	0	0	0	0	0	0	0	0	0	0	1650500000	1849700000	3454200000	0	0	0	0	0	0	0	196940	0	0	2634800000	1335600000	1781200000	7.47457e-05	0	0	0	0	0	341240	0	0	0	1584900000	2579400000	2056500000	0
Leucine-rich PPR motif-containing protein, mitochondrial	LRPPRC		0	0	0	0	3763400000	3519500000	2541400000	0	0	0	0	0	0	0	447300	0	0	1650500000	1849700000	3454200000	0.000271009	0	0	0	0	0	0	76284	0	0	2634800000	1335600000	1781200000	2.89525e-05	0	0	0	0	0	674570	0	0	160570	1584900000	2579400000	2056500000	0
Uncharacterized protein C11orf84	C11orf84		0	1269000	0	0	3763400000	3519500000	2541400000	0.000337195	0	0	0	0	0	0	0	0	866980	1650500000	1849700000	3454200000	0	0	0.000250993	0	0	0	0	241520	0	0	2634800000	1335600000	1781200000	9.16654e-05	0	0	0	0	0	0	513990	599970	545540	1584900000	2579400000	2056500000	0.000324304
Eukaryotic translation initiation factor 4E type 2	EIF4E2		0	0	0	0	3763400000	3519500000	2541400000	0	0	0	0	0	0	0	0	0	1175600	1650500000	1849700000	3454200000	0	0	0.000340339	0	0	0	2500900	1456300	946560	0	2634800000	1335600000	1781200000	0.000552717	0.000708715	0	1.7173	1.28224	∞	1082900	785700	776070	418700	1584900000	2579400000	2056500000	0.000495741
40S ribosomal protein S29	RPS29		0	0	0	0	3763400000	3519500000	2541400000	0	0	0	0	0	0	0	0	0	1630700	1650500000	1849700000	3454200000	0	0	0.000472092	0	0	0	840320	439800	501970	0	2634800000	1335600000	1781200000	0.00016692	0.000375839	0	1.91069	2.25161	∞	0	338410	0	223120	1584900000	2579400000	2056500000	0.000213521
Protein-L-isoaspartate(D-aspartate) O-methyltransferase	PCMT1		0	0	0	0	3763400000	3519500000	2541400000	0	0	0	0	0	0	0	0	0	1168500	1650500000	1849700000	3454200000	0	0	0.000338284	0	0	0	821710	530280	0	0	2634800000	1335600000	1781200000	0.00020126	0	0	1.54958	0	0	690310	439880	428950	209130	1584900000	2579400000	2056500000	0.000277544
Importin-8	IPO8		0	0	0	0	3763400000	3519500000	2541400000	0	0	0	0	0	0	0	0	0	0	1650500000	1849700000	3454200000	0	0	0	0	0	0	0	0	0	0	2634800000	1335600000	1781200000	0	0	0	0	0	0	1705900	0	0	0	1584900000	2579400000	2056500000	0
Stress-induced-phosphoprotein 1	STIP1		0	0	0	0	3763400000	3519500000	2541400000	0	0	0	0	0	0	0	0	0	1220300	1650500000	1849700000	3454200000	0	0	0.00035328	0	0	0	0	1077700	0	0	2634800000	1335600000	1781200000	0.000409025	0	0	0	0	0	829560	0	185140	102050	1584900000	2579400000	2056500000	0
Tropomyosin alpha-4 chain	TPM4		0	0	0	0	3763400000	3519500000	2541400000	0	0	0	0	0	0	0	0	0	725270	1650500000	1849700000	3454200000	0	0	0.000209968	0	0	0	2260600	3275100	1292700	0	2634800000	1335600000	1781200000	0.00124302	0.00096788	0	0.690238	0.778654	∞	0	785320	1534000	3574300	1584900000	2579400000	2056500000	0.000495501
Heterogeneous nuclear ribonucleoprotein L	HNRNPL		0	0	0	0	3763400000	3519500000	2541400000	0	0	0	0	0	0	0	0	0	0	1650500000	1849700000	3454200000	0	0	0	0	0	0	0	0	0	0	2634800000	1335600000	1781200000	0	0	0	0	0	0	180400	0	0	0	1584900000	2579400000	2056500000	0
Protein S100-A7	S100A7		0	0	0	0	3763400000	3519500000	2541400000	0	0	0	0	0	0	0	2753100	0	0	1650500000	1849700000	3454200000	0.00166804	0	0	0	0	0	0	9737300	0	0	2634800000	1335600000	1781200000	0.00369565	0	0	0	0	0	524300	0	5234700	31206000	1584900000	2579400000	2056500000	0
Cold-inducible RNA-binding protein	CIRBP		0	0	0	0	3763400000	3519500000	2541400000	0	0	0	0	0	0	0	0	0	0	1650500000	1849700000	3454200000	0	0	0	0	0	0	0	0	0	0	2634800000	1335600000	1781200000	0	0	0	0	0	0	0	703320	954160	568770	1584900000	2579400000	2056500000	0.000443763
Fatty acid-binding protein, epidermal	FABP5		0	0	0	0	3763400000	3519500000	2541400000	0	0	0	0	0	0	0	0	0	0	1650500000	1849700000	3454200000	0	0	0	0	0	0	0	4112300	1522900	0	2634800000	1335600000	1781200000	0.00156076	0.00114024	0	0	0.730563	∞	608660	0	0	4231900	1584900000	2579400000	2056500000	0
Ig kappa chain C region	IGKC		0	0	0	0	3763400000	3519500000	2541400000	0	0	0	0	0	0	0	104400000	0	0	1650500000	1849700000	3454200000	0.0632536	0	0	0	0	0	0	6146300	0	0	2634800000	1335600000	1781200000	0.00233274	0	0	0	0	0	1229400	1359900	1315700	2990200	1584900000	2579400000	2056500000	0.000858035
Serpin B4	SERPINB4		0	0	0	0	3763400000	3519500000	2541400000	0	0	0	0	0	0	0	68455000	0	0	1650500000	1849700000	3454200000	0.0414753	0	0	0	0	0	0	12819000	2609500	0	2634800000	1335600000	1781200000	0.00486526	0.0019538	0	0	0.401582	∞	670550	1078000	5569300	9418800	1584900000	2579400000	2056500000	0.000680169
Peroxisomal multifunctional enzyme type 2;(3R)-hydroxyacyl-CoA dehydrogenase;Enoyl-CoA hydratase 2	HSD17B4		0	0	0	0	3763400000	3519500000	2541400000	0	0	0	0	0	0	0	0	0	0	1650500000	1849700000	3454200000	0	0	0	0	0	0	0	6308800	0	0	2634800000	1335600000	1781200000	0.00239441	0	0	0	0	0	1914400	0	583690	1587800	1584900000	2579400000	2056500000	0
Neutral alpha-glucosidase AB	GANAB		0	0	0	0	3763400000	3519500000	2541400000	0	0	0	0	0	0	0	0	0	0	1650500000	1849700000	3454200000	0	0	0	0	0	0	0	0	0	0	2634800000	1335600000	1781200000	0	0	0	0	0	0	1457200	126050	70015	128580	1584900000	2579400000	2056500000	7.95318e-05
40S ribosomal protein S10	RPS10		0	0	0	0	3763400000	3519500000	2541400000	0	0	0	0	0	0	0	0	0	0	1650500000	1849700000	3454200000	0	0	0	0	0	0	0	0	0	1064900	2634800000	1335600000	1781200000	0	0	0.000597855	0	0	0	0	0	1607000	1370000	1584900000	2579400000	2056500000	0
Tropomodulin-3	TMOD3		0	0	0	0	3763400000	3519500000	2541400000	0	0	0	0	0	0	0	590370	0	0	1650500000	1849700000	3454200000	0.000357692	0	0	0	0	0	0	0	0	0	2634800000	1335600000	1781200000	0	0	0	0	0	0	1439100	1730200	0	6886100	1584900000	2579400000	2056500000	0.00109168
Plastin-3;Plastin-2;Plastin-1	PLS3;LCP1;PLS1		0	0	0	0	3763400000	3519500000	2541400000	0	0	0	0	0	0	0	1150600	0	0	1650500000	1849700000	3454200000	0.000697122	0	0	0	0	0	0	3673100	0	0	2634800000	1335600000	1781200000	0.00139407	0	0	0	0	0	606240	0	595260	0	1584900000	2579400000	2056500000	0
Serpin B3	SERPINB3		0	0	0	0	3763400000	3519500000	2541400000	0	0	0	0	0	0	0	1924700	0	0	1650500000	1849700000	3454200000	0.00116613	0	0	0	0	0	0	3724400	0	0	2634800000	1335600000	1781200000	0.00141354	0	0	0	0	0	0	0	0	0	1584900000	2579400000	2056500000	0
Proteasome activator complex subunit 1	PSME1		0	0	0	0	3763400000	3519500000	2541400000	0	0	0	0	0	0	0	0	0	0	1650500000	1849700000	3454200000	0	0	0	0	0	0	0	876380	0	0	2634800000	1335600000	1781200000	0.000332617	0	0	0	0	0	0	0	0	0	1584900000	2579400000	2056500000	0
Long-chain-fatty-acid--CoA ligase 3	ACSL3		0	0	0	0	3763400000	3519500000	2541400000	0	0	0	0	0	0	0	0	0	0	1650500000	1849700000	3454200000	0	0	0	0	0	0	0	1152600	0	0	2634800000	1335600000	1781200000	0.000437453	0	0	0	0	0	1067700	0	2490300	1631500	1584900000	2579400000	2056500000	0
40S ribosomal protein S13	RPS13		0	0	0	0	3763400000	3519500000	2541400000	0	0	0	0	0	0	0	0	0	0	1650500000	1849700000	3454200000	0	0	0	0	0	0	0	0	0	0	2634800000	1335600000	1781200000	0	0	0	0	0	0	1486500	0	0	2505700	1584900000	2579400000	2056500000	0
Cytosol aminopeptidase	LAP3		0	0	0	0	3763400000	3519500000	2541400000	0	0	0	0	0	0	0	0	0	0	1650500000	1849700000	3454200000	0	0	0	0	0	0	0	1312500	0	0	2634800000	1335600000	1781200000	0.00049814	0	0	0	0	0	995770	1662100	0	112160	1584900000	2579400000	2056500000	0.00104871
60S ribosomal protein L7a	RPL7A		0	0	0	0	3763400000	3519500000	2541400000	0	0	0	0	0	0	0	1949900	0	0	1650500000	1849700000	3454200000	0.0011814	0	0	0	0	0	0	1819100	0	588450	2634800000	1335600000	1781200000	0.000690413	0	0.000330367	0	0	0	0	1041400	1620100	1915200	1584900000	2579400000	2056500000	0.000657076
Adenylyl cyclase-associated protein 1	CAP1		0	0	0	0	3763400000	3519500000	2541400000	0	0	0	0	0	0	0	0	0	0	1650500000	1849700000	3454200000	0	0	0	0	0	0	0	0	0	0	2634800000	1335600000	1781200000	0	0	0	0	0	0	0	0	0	0	1584900000	2579400000	2056500000	0
60S ribosomal protein L27	RPL27		768380	0	0	0	3763400000	3519500000	2541400000	0	0	0	∞	0	0	0	0	0	0	1650500000	1849700000	3454200000	0	0	0	0	0	0	0	2289600	0	935540	2634800000	1335600000	1781200000	0.000868984	0	0.00052523	0	0	0	1455300	999800	1792000	2438400	1584900000	2579400000	2056500000	0.000630828
Putative uncharacterized protein encoded by LINC00336	LINC00336		0	0	0	0	3763400000	3519500000	2541400000	0	0	0	0	0	0	0	0	0	0	1650500000	1849700000	3454200000	0	0	0	0	0	0	15141000	8607100	8172700	0	2634800000	1335600000	1781200000	0.0032667	0.00611912	0	1.75913	1.87318	∞	2578900	7316900	2424300	5206100	1584900000	2579400000	2056500000	0.00461663
Putative 40S ribosomal protein S26-like 1;40S ribosomal protein S26	RPS26P11;RPS26		3968200	1042200	0	0	3763400000	3519500000	2541400000	0.00027693	0	0	3.80752	0	0	0	7004400	3255800	2581600	1650500000	1849700000	3454200000	0.0042438	0.00176018	0.00074738	0	0.414764	2.35513	2708500	5373500	1944400	2628500	2634800000	1335600000	1781200000	0.00203943	0.00145583	0.00147569	0.504048	0.713838	0.986538	2707400	2215100	3618700	3448400	1584900000	2579400000	2056500000	0.00139763
40S ribosomal protein S9	RPS9		949860	0	0	0	3763400000	3519500000	2541400000	0	0	0	∞	0	0	1049900	2224600	1136200	2401200	1650500000	1849700000	3454200000	0.00134783	0.000614262	0.000695154	0.47195	0.45574	0.883634	0	4008900	2391400	1296000	2634800000	1335600000	1781200000	0.00152152	0.00179051	0.000727599	0	1.17679	2.46084	1757600	0	2256700	2289100	1584900000	2579400000	2056500000	0
Adenosylhomocysteinase	AHCY		0	0	0	0	3763400000	3519500000	2541400000	0	0	0	0	0	0	0	0	0	0	1650500000	1849700000	3454200000	0	0	0	0	0	0	0	7334300	2169100	0	2634800000	1335600000	1781200000	0.00278363	0.00162406	0	0	0.583435	∞	4706200	685110	2201900	0	1584900000	2579400000	2056500000	0.000432273
26S proteasome non-ATPase regulatory subunit 2	PSMD2		0	0	0	0	3763400000	3519500000	2541400000	0	0	0	0	0	0	0	0	0	0	1650500000	1849700000	3454200000	0	0	0	0	0	0	0	0	0	0	2634800000	1335600000	1781200000	0	0	0	0	0	0	5894500	3584800	3236300	1652600	1584900000	2579400000	2056500000	0.00226185
Galectin-3	LGALS3		0	0	0	0	3763400000	3519500000	2541400000	0	0	0	0	0	0	0	1834800	0	0	1650500000	1849700000	3454200000	0.00111166	0	0	0	0	0	0	2114700	0	1025300	2634800000	1335600000	1781200000	0.000802604	0	0.000575623	0	0	0	1169400	0	1337100	1623000	1584900000	2579400000	2056500000	0
Voltage-dependent anion-selective channel protein 2	VDAC2		0	0	0	0	3763400000	3519500000	2541400000	0	0	0	0	0	0	0	349290	0	0	1650500000	1849700000	3454200000	0.000211627	0	0	0	0	0	0	2529500	1266900	0	2634800000	1335600000	1781200000	0.000960035	0.000948562	0	0	0.98805	∞	0	0	983750	967220	1584900000	2579400000	2056500000	0
Protein DJ-1	PARK7		867590	0	0	0	3763400000	3519500000	2541400000	0	0	0	∞	0	0	0	0	0	0	1650500000	1849700000	3454200000	0	0	0	0	0	0	0	2649800	1231500	1029600	2634800000	1335600000	1781200000	0.00100569	0.000922058	0.000578037	0	0.916838	1.59515	2959400	509420	0	1101300	1584900000	2579400000	2056500000	0.000321421
Eukaryotic translation initiation factor 6	EIF6		0	0	0	0	3763400000	3519500000	2541400000	0	0	0	0	0	0	0	0	0	0	1650500000	1849700000	3454200000	0	0	0	0	0	0	0	0	0	0	2634800000	1335600000	1781200000	0	0	0	0	0	0	1476800	0	0	0	1584900000	2579400000	2056500000	0
Prostaglandin E synthase 3	PTGES3		0	0	0	0	3763400000	3519500000	2541400000	0	0	0	0	0	0	0	0	0	0	1650500000	1849700000	3454200000	0	0	0	0	0	0	0	5400400	0	0	2634800000	1335600000	1781200000	0.00204964	0	0	0	0	0	0	0	1146000	1827900	1584900000	2579400000	2056500000	0
NADH-cytochrome b5 reductase 3;NADH-cytochrome b5 reductase 3 membrane-bound form;NADH-cytochrome b5 reductase 3 soluble form	CYB5R3		0	0	0	0	3763400000	3519500000	2541400000	0	0	0	0	0	0	0	372060	0	0	1650500000	1849700000	3454200000	0.000225423	0	0	0	0	0	0	7189100	3711800	3230000	2634800000	1335600000	1781200000	0.00272852	0.00277913	0.00181338	0	1.01855	1.53256	2657300	1219500	0	0	1584900000	2579400000	2056500000	0.000769449
60S ribosomal protein L18	RPL18		0	0	0	0	3763400000	3519500000	2541400000	0	0	0	0	0	0	2558300	1181500	0	0	1650500000	1849700000	3454200000	0.000715844	0	0	2.1653	0	0	0	3747900	1883700	0	2634800000	1335600000	1781200000	0.00142246	0.00141038	0	0	0.991505	∞	5991400	2068600	3964400	3428200	1584900000	2579400000	2056500000	0.00130519
Proliferation-associated protein 2G4	PA2G4		0	0	0	0	3763400000	3519500000	2541400000	0	0	0	0	0	0	0	0	0	0	1650500000	1849700000	3454200000	0	0	0	0	0	0	0	19117000	0	0	2634800000	1335600000	1781200000	0.00725558	0	0	0	0	0	5300800	0	1103300	0	1584900000	2579400000	2056500000	0
Elongation factor 1-delta	EEF1D		0	0	0	0	3763400000	3519500000	2541400000	0	0	0	0	0	0	0	0	0	1349100	1650500000	1849700000	3454200000	0	0	0.000390568	0	0	0	0	7903400	3399000	0	2634800000	1335600000	1781200000	0.00299962	0.00254492	0	0	0.848415	∞	3426800	0	2447400	1724100	1584900000	2579400000	2056500000	0
Eukaryotic translation initiation factor 5A-2;Eukaryotic translation initiation factor 5A-1-like;Eukaryotic translation initiation factor 5A-1	EIF5A2;EIF5AL1;EIF5A		0	0	0	0	3763400000	3519500000	2541400000	0	0	0	0	0	0	0	177820	0	0	1650500000	1849700000	3454200000	0.000107737	0	0	0	0	0	0	6185200	3604800	0	2634800000	1335600000	1781200000	0.0023475	0.00269901	0	0	1.14974	∞	4068200	0	1750000	4293600	1584900000	2579400000	2056500000	0
Glutamate dehydrogenase 1, mitochondrial;Glutamate dehydrogenase 2, mitochondrial	GLUD1;GLUD2		0	0	0	0	3763400000	3519500000	2541400000	0	0	0	0	0	0	0	0	0	0	1650500000	1849700000	3454200000	0	0	0	0	0	0	0	6226400	0	0	2634800000	1335600000	1781200000	0.00236314	0	0	0	0	0	1734600	0	1982300	1408800	1584900000	2579400000	2056500000	0
Peptidyl-prolyl cis-trans isomerase FKBP1A	FKBP1A		0	0	0	0	3763400000	3519500000	2541400000	0	0	0	0	0	0	0	680210	739310	0	1650500000	1849700000	3454200000	0.000412124	0.000399692	0	0	0.969835	∞	0	0	0	0	2634800000	1335600000	1781200000	0	0	0	0	0	0	3896800	0	2915900	3939000	1584900000	2579400000	2056500000	0
Ezrin	EZR		2097500	0	0	0	3763400000	3519500000	2541400000	0	0	0	∞	0	0	0	4645800	488280	0	1650500000	1849700000	3454200000	0.00281478	0.000263978	0	0	0.0937827	∞	0	6349900	0	0	2634800000	1335600000	1781200000	0.00241001	0	0	0	0	0	4574400	0	0	0	1584900000	2579400000	2056500000	0
40S ribosomal protein S20	RPS20		0	318670	0	0	3763400000	3519500000	2541400000	8.46761e-05	0	0	0	0	0	3554100	16866000	3232200	14185000	1650500000	1849700000	3454200000	0.0102187	0.00174742	0.00410659	0.210726	0.171002	0.425515	0	24602000	13867000	5137600	2634800000	1335600000	1781200000	0.00933733	0.0103826	0.00288435	0	1.11195	3.59964	4299100	5979200	12526000	10052000	1584900000	2579400000	2056500000	0.0037726
Profilin-1	PFN1		1414800	0	0	0	3763400000	3519500000	2541400000	0	0	0	∞	0	0	0	583180	383410	0	1650500000	1849700000	3454200000	0.000353335	0.000207282	0	0	0.586645	∞	0	9480100	2099300	0	2634800000	1335600000	1781200000	0.00359803	0.0015718	0	0	0.43685	∞	8437200	0	7293800	1946000	1584900000	2579400000	2056500000	0
Dihydrolipoyl dehydrogenase, mitochondrial	DLD		0	0	0	0	3763400000	3519500000	2541400000	0	0	0	0	0	0	0	0	0	0	1650500000	1849700000	3454200000	0	0	0	0	0	0	0	3673500	0	0	2634800000	1335600000	1781200000	0.00139422	0	0	0	0	0	1596200	0	1436700	1518300	1584900000	2579400000	2056500000	0
40S ribosomal protein SA	RPSA		833550	0	0	0	3763400000	3519500000	2541400000	0	0	0	∞	0	0	0	1513800	502200	1838200	1650500000	1849700000	3454200000	0.000917177	0.000271503	0.000532164	0	0.296021	0.510188	0	11926000	6468700	1588900	2634800000	1335600000	1781200000	0.00452634	0.00484329	0.000892039	0	1.07002	5.42946	7075600	0	4480000	4266200	1584900000	2579400000	2056500000	0
Unconventional myosin-Ie	MYO1E		0	0	0	0	3763400000	3519500000	2541400000	0	0	0	0	0	0	0	0	0	0	1650500000	1849700000	3454200000	0	0	0	0	0	0	0	0	0	0	2634800000	1335600000	1781200000	0	0	0	0	0	0	4000900	4157600	3266000	10482000	1584900000	2579400000	2056500000	0.00262326
High mobility group protein B2	HMGB2		0	0	0	0	3763400000	3519500000	2541400000	0	0	0	0	0	0	0	0	0	0	1650500000	1849700000	3454200000	0	0	0	0	0	0	9219300	24591000	14862000	0	2634800000	1335600000	1781200000	0.00933316	0.0111276	0	0.374905	1.19226	∞	13564000	0	11645000	24709000	1584900000	2579400000	2056500000	0
14-3-3 protein theta	YWHAQ		0	0	0	0	3763400000	3519500000	2541400000	0	0	0	0	0	0	0	2694200	0	0	1650500000	1849700000	3454200000	0.00163235	0	0	0	0	0	0	1871500	0	0	2634800000	1335600000	1781200000	0.000710301	0	0	0	0	0	0	0	0	0	1584900000	2579400000	2056500000	0
Transketolase	TKT		3549400	0	0	0	3763400000	3519500000	2541400000	0	0	0	∞	0	0	0	0	0	0	1650500000	1849700000	3454200000	0	0	0	0	0	0	3197800	27027000	10070000	2563600	2634800000	1335600000	1781200000	0.0102577	0.00753968	0.00143925	0.118319	0.735026	5.2386	33376000	792490	8180200	4542600	1584900000	2579400000	2056500000	0.000500025
Transgelin-2	TAGLN2		0	0	0	0	3763400000	3519500000	2541400000	0	0	0	0	0	0	0	904860	0	2419800	1650500000	1849700000	3454200000	0.000548234	0	0.000700538	0	0	0	5895600	42453000	4905800	6560400	2634800000	1335600000	1781200000	0.0161124	0.00367311	0.00368313	0.138874	0.227967	0.997277	29140000	3609600	16351000	15983000	1584900000	2579400000	2056500000	0.00227749
Serpin B5	SERPINB5		1648800	0	0	0	3763400000	3519500000	2541400000	0	0	0	∞	0	0	0	11331000	2765200	0	1650500000	1849700000	3454200000	0.00686519	0.00149495	0	0	0.217757	∞	8096900	64383000	28275000	4895300	2634800000	1335600000	1781200000	0.0244356	0.0211703	0.00274832	0.125761	0.866368	7.70299	32121000	4579900	14555000	11197000	1584900000	2579400000	2056500000	0.00288971
Acetyl-coenzyme A synthetase, cytoplasmic	ACSS2		18517000	298420	0	0	3763400000	3519500000	2541400000	7.92953e-05	0	0	62.0501	0	0	17105000	12297000	14795000	39359000	1650500000	1849700000	3454200000	0.00745047	0.00799859	0.0113945	1.39099	1.07357	0.701968	8979300	240890000	0	0	2634800000	1335600000	1781200000	0.0914263	0	0	0.0372755	0	0	487630000	761890000	802220000	288240000	1584900000	2579400000	2056500000	0.480718
Peroxiredoxin-6	PRDX6		729170	0	55064	0	3763400000	3519500000	2541400000	0	1.56454e-05	0	∞	∞	∞	2329500	2441100	513560	40310	1650500000	1849700000	3454200000	0.00147901	0.000277645	1.16699e-05	0.954283	0.187724	23.7917	18885000	47122000	28456000	18676000	2634800000	1335600000	1781200000	0.0178845	0.0213058	0.0104851	0.400768	1.1913	2.03201	17215000	8288900	11184000	19543000	1584900000	2579400000	2056500000	0.00522992
Alpha-enolase	ENO1		58206000	156980	203910	0	3763400000	3519500000	2541400000	4.17123e-05	5.79372e-05	0	370.786	1.38897	∞	2277400	14560000	5969600	24568000	1650500000	1849700000	3454200000	0.00882157	0.00322733	0.0071125	0.156415	0.365846	0.453755	50221000	209650000	121320000	44623000	2634800000	1335600000	1781200000	0.0795696	0.0908356	0.0250522	0.239547	1.14159	3.62585	247250000	9255500	100070000	62873000	1584900000	2579400000	2056500000	0.0058398
Prolactin-inducible protein	PIP		187930	0	218150	0	3763400000	3519500000	2541400000	0	6.19832e-05	0	∞	∞	∞	916640	165800	1027900	0	1650500000	1849700000	3454200000	0.000100454	0.000555712	0	5.52859	5.53198	∞	0	0	0	0	2634800000	1335600000	1781200000	0	0	0	0	0	0	346450	817680	746620	1010600	1584900000	2579400000	2056500000	0.000515919
Actin, alpha skeletal muscle;Actin, alpha cardiac muscle 1;Actin, gamma-enteric smooth muscle;Actin, aortic smooth muscle	ACTA1;ACTC1;ACTG2;ACTA2		3691400	119550	228950	0	3763400000	3519500000	2541400000	3.17665e-05	6.50519e-05	0	30.8775	2.04781	∞	9515100	12396000	7764400	21757000	1650500000	1849700000	3454200000	0.00751045	0.00419765	0.00629871	0.767594	0.558908	0.666431	39730000	111410000	0	46655000	2634800000	1335600000	1781200000	0.042284	0	0.026193	0.356611	0	0	23037000	35302000	66766000	120820000	1584900000	2579400000	2056500000	0.022274
Eukaryotic initiation factor 4A-I	EIF4A1		1252000	0	541300	0	3763400000	3519500000	2541400000	0	0.0001538	0	∞	∞	∞	0	21558000	412190	1462500	1650500000	1849700000	3454200000	0.0130615	0.000222842	0.000423398	0	0.017061	0.526317	0	21945000	11856000	2313300	2634800000	1335600000	1781200000	0.00832891	0.00887691	0.00129873	0	1.0658	6.83506	13188000	0	8152900	8416300	1584900000	2579400000	2056500000	0
Fructose-bisphosphate aldolase A	ALDOA		2200300	0	593000	0	3763400000	3519500000	2541400000	0	0.00016849	0	∞	∞	∞	787060	14963000	7202200	5513000	1650500000	1849700000	3454200000	0.00906574	0.00389371	0.00159603	0.0526004	0.429498	2.43963	4525600	74109000	23039000	2034800	2634800000	1335600000	1781200000	0.028127	0.0172499	0.00114238	0.0610668	0.613287	15.1	24195000	1212900	14205000	5816400	1584900000	2579400000	2056500000	0.000765285
Cathepsin D;Cathepsin D light chain;Cathepsin D heavy chain	CTSD		984780	240530	745370	0	3763400000	3519500000	2541400000	6.3913e-05	0.000211783	0	4.09421	3.31362	∞	0	1537900	0	917650	1650500000	1849700000	3454200000	0.000931778	0	0.000265662	0	0	0	0	15641000	2643700	849400	2634800000	1335600000	1781200000	0.00593631	0.00197941	0.00047687	0	0.333441	4.15084	2508200	922790	2442800	2347200	1584900000	2579400000	2056500000	0.000582239
Tubulin beta-3 chain	TUBB3		54087	0	802600	0	3763400000	3519500000	2541400000	0	0.000228044	0	∞	∞	∞	3944900	6815700	5428400	12628000	1650500000	1849700000	3454200000	0.00412948	0.00293475	0.00365584	0.578796	0.710682	0.802756	4168000	0	5663600	12714000	2634800000	1335600000	1781200000	0	0.00424049	0.00713788	∞	∞	0.594082	3767700	9070700	22150000	19688000	1584900000	2579400000	2056500000	0.0057232
Peptidyl-prolyl cis-trans isomerase A;Peptidyl-prolyl cis-trans isomerase A, N-terminally processed	PPIA		762540	0	1625400	0	3763400000	3519500000	2541400000	0	0.000461827	0	∞	∞	∞	1812500	12683000	11474000	1830300	1650500000	1849700000	3454200000	0.00768434	0.00620317	0.000529877	0.142908	0.807248	11.7068	7677900	169270000	51592000	22514000	2634800000	1335600000	1781200000	0.064244	0.0386283	0.0126398	0.0453589	0.601276	3.05609	65400000	14358000	30222000	52761000	1584900000	2579400000	2056500000	0.00905925
Sodium/potassium-transporting ATPase subunit alpha-3;Sodium/potassium-transporting ATPase subunit alpha-2;Sodium/potassium-transporting ATPase subunit alpha-1;Potassium-transporting ATPase alpha chain 1	ATP1A3;ATP1A2;ATP1A1;ATP4A		12460000	3136300	2626900	0	3763400000	3519500000	2541400000	0.000833369	0.000746384	0	3.97283	0.895623	∞	88454000	0	0	0	1650500000	1849700000	3454200000	0	0	0	∞	0	0	3223700	0	0	0	2634800000	1335600000	1781200000	0	0	0	∞	0	0	10219000	0	0	0	1584900000	2579400000	2056500000	0
Annexin A1	ANXA1		13012000	1609400	2788600	0	3763400000	3519500000	2541400000	0.000427645	0.000792328	0	8.085	1.85277	∞	8722200	14254000	12697000	2671300	1650500000	1849700000	3454200000	0.00863617	0.00686436	0.000773348	0.611912	0.794838	8.87615	15591000	181030000	82836000	27450000	2634800000	1335600000	1781200000	0.0687073	0.0620216	0.015411	0.0861238	0.902692	4.02451	87034000	7037900	46298000	36059000	1584900000	2579400000	2056500000	0.0044406
Protein S100-A9	S100A9		12415000	16786000	16053000	0	3763400000	3519500000	2541400000	0.00446033	0.00456116	0	0.739604	1.02261	∞	5030600	792310000	16532000	3431700	1650500000	1849700000	3454200000	0.480042	0.00893767	0.000993486	0.00634928	0.0186185	8.99627	0	272920000	86681000	104650000	2634800000	1335600000	1781200000	0.103583	0.0649004	0.0587525	0	0.626556	1.10464	8247200	45966000	120300000	230440000	1584900000	2579400000	2056500000	0.0290025
14-3-3 protein epsilon	YWHAE		0	0	0	18451	3763400000	3519500000	2541400000	0	0	7.26017e-06	0	0	0	0	0	0	0	1650500000	1849700000	3454200000	0	0	0	0	0	0	0	2297000	0	0	2634800000	1335600000	1781200000	0.000871793	0	0	0	0	0	3914400	0	0	0	1584900000	2579400000	2056500000	0
60S acidic ribosomal protein P0;60S acidic ribosomal protein P0-like	RPLP0;RPLP0P6		54609	0	0	27913	3763400000	3519500000	2541400000	0	0	1.09833e-05	∞	0	0	0	3509900	1590400	656940	1650500000	1849700000	3454200000	0.00212657	0.000859815	0.000190186	0	0.404321	4.52092	1350700	11269000	4094800	3114000	2634800000	1335600000	1781200000	0.00427698	0.00306589	0.00174826	0.11986	0.716834	1.75368	1459600	727960	3569200	7142300	1584900000	2579400000	2056500000	0.00045931
Prelamin-A/C;Lamin-A/C	LMNA		0	0	0	46253	3763400000	3519500000	2541400000	0	0	1.81998e-05	0	0	0	0	37576000	0	0	1650500000	1849700000	3454200000	0.0227664	0	0	0	0	0	0	20995000	12133000	3073400	2634800000	1335600000	1781200000	0.00796835	0.00908431	0.00172547	0	1.14005	5.26484	15625000	557720	15573000	5824600	1584900000	2579400000	2056500000	0.000351896
ATP synthase subunit beta, mitochondrial	ATP5B		3645100	763480	270440	91680	3763400000	3519500000	2541400000	0.00020287	7.68405e-05	3.60746e-05	4.77432	0.378767	2.13004	1455700	9771900	7746400	5258100	1650500000	1849700000	3454200000	0.00592057	0.00418792	0.00152223	0.148968	0.707351	2.75117	2892100	70220000	35779000	13134000	2634800000	1335600000	1781200000	0.026651	0.0267887	0.00737368	0.0411863	1.00517	3.63302	54115000	0	31152000	32300000	1584900000	2579400000	2056500000	0
Pyruvate kinase PKM	PKM		22525000	6586500	0	92732	3763400000	3519500000	2541400000	0.00175015	0	3.64885e-05	3.41987	0	0	2579200	32120000	14645000	9499500	1650500000	1849700000	3454200000	0.0194608	0.0079175	0.00275013	0.0802989	0.406844	2.87895	27650000	227950000	98740000	37571000	2634800000	1335600000	1781200000	0.0865151	0.0739293	0.0210931	0.121299	0.854525	3.50491	105060000	8557500	61877000	55395000	1584900000	2579400000	2056500000	0.00539939
40S ribosomal protein S3	RPS3		4462600	0	2908000	136240	3763400000	3519500000	2541400000	0	0.000826254	5.36082e-05	∞	∞	15.4128	0	5360500	1506100	0	1650500000	1849700000	3454200000	0.0032478	0.00081424	0	0	0.250705	∞	0	21533000	10530000	8902300	2634800000	1335600000	1781200000	0.00817254	0.0078841	0.00499792	0	0.964706	1.57747	6424100	1107400	15528000	10371000	1584900000	2579400000	2056500000	0.000698719
Alpha-actinin-4;Alpha-actinin-1	ACTN4;ACTN1		8077800	0	1233700	186750	3763400000	3519500000	2541400000	0	0.000350533	7.34831e-05	∞	∞	4.77025	4072800	0	5119700	2189200	1650500000	1849700000	3454200000	0	0.00276785	0.000633779	∞	∞	4.36722	2960500	4139900	0	1482800	2634800000	1335600000	1781200000	0.00157124	0	0.000832472	0.715114	0	0	15757000	14886000	9167600	11270000	1584900000	2579400000	2056500000	0.00939239
Ig kappa chain V-I region Lay;Ig kappa chain V-III region POM;Ig kappa chain V-III region VH;Ig kappa chain V-III region CLL			10553000	283650	2100800	221200	3763400000	3519500000	2541400000	7.53707e-05	0.000596903	8.70386e-05	37.2043	7.91957	6.85791	2759700	22676000	10965000	12559000	1650500000	1849700000	3454200000	0.0137389	0.00592799	0.00363586	0.121701	0.431476	1.63042	9009600	8579900	6014800	3845700	2634800000	1335600000	1781200000	0.00325638	0.00450344	0.00215905	1.05008	1.38296	2.08585	5840800	6721800	9280100	8782400	1584900000	2579400000	2056500000	0.00424115
26S protease regulatory subunit 7	PSMC2		0	0	0	269610	3763400000	3519500000	2541400000	0	0	0.000106087	0	0	0	0	0	0	717940	1650500000	1849700000	3454200000	0	0	0.000207846	0	0	0	3347500	912490	1827000	0	2634800000	1335600000	1781200000	0.000346322	0.00136792	0	3.66853	3.94986	∞	1383600	1258900	0	1285500	1584900000	2579400000	2056500000	0.000794309
Unconventional myosin-Ic	MYO1C		0	0	0	500320	3763400000	3519500000	2541400000	0	0	0.000196868	0	0	0	0	0	0	0	1650500000	1849700000	3454200000	0	0	0	0	0	0	0	5045800	0	0	2634800000	1335600000	1781200000	0.00191506	0	0	0	0	0	29137000	17619000	8988800	47237000	1584900000	2579400000	2056500000	0.0111168
Carboxymethylenebutenolidase homolog	CMBL		6786700	3864600	4617000	506600	3763400000	3519500000	2541400000	0.00102689	0.00131183	0.000199339	1.75612	1.27748	6.58092	10252000	1229400	7769000	2256400	1650500000	1849700000	3454200000	0.000744865	0.00420014	0.000653234	8.33903	5.63879	6.42977	10806000	17588000	4490400	455370	2634800000	1335600000	1781200000	0.00667527	0.00336208	0.000255653	0.614396	0.503663	13.1509	17898000	10972000	16041000	713050	1584900000	2579400000	2056500000	0.00692283
Girdin	CCDC88A		0	0	0	663160	3763400000	3519500000	2541400000	0	0	0.000260943	0	0	0	0	0	0	0	1650500000	1849700000	3454200000	0	0	0	0	0	0	0	0	0	0	2634800000	1335600000	1781200000	0	0	0	0	0	0	0	0	0	0	1584900000	2579400000	2056500000	0
Histone H2A type 2-C;Histone H2A type 2-A;Histone H2A.V;Histone H2A.Z;Histone H2A type 1-A	HIST2H2AC;HIST2H2AA3;H2AFV;H2AFZ;HIST1H2AA		0	0	0	752780	3763400000	3519500000	2541400000	0	0	0.000296207	0	0	0	9285700	8774300	0	9657500	1650500000	1849700000	3454200000	0.00531615	0	0.00279587	1.05828	0	0	0	0	0	0	2634800000	1335600000	1781200000	0	0	0	0	0	0	0	0	1858700	7643400	1584900000	2579400000	2056500000	0
L-lactate dehydrogenase A chain	LDHA		4577000	1805400	1366400	764990	3763400000	3519500000	2541400000	0.000479726	0.000388237	0.000301011	2.53517	0.809289	1.28978	6878200	38751000	8459900	7450900	1650500000	1849700000	3454200000	0.0234783	0.00457366	0.00215706	0.177497	0.194803	2.12033	7098200	104880000	37601000	15350000	2634800000	1335600000	1781200000	0.0398057	0.0281529	0.00861779	0.0676793	0.707258	3.26684	67684000	2693700	16809000	19424000	1584900000	2579400000	2056500000	0.0016996
Peroxiredoxin-2	PRDX2		35583	0	1687500	906680	3763400000	3519500000	2541400000	0	0.000479472	0.000356764	∞	∞	1.34395	919340	6932700	2204800	2810400	1650500000	1849700000	3454200000	0.00420036	0.00119198	0.000813618	0.132609	0.28378	1.46503	0	20731000	3261900	3814400	2634800000	1335600000	1781200000	0.00786815	0.00244227	0.00214148	0	0.3104	1.14046	3931900	2578300	2231000	6389900	1584900000	2579400000	2056500000	0.00162679
60S ribosomal protein L38	RPL38		7256200	193590	345130	1095300	3763400000	3519500000	2541400000	5.14402e-05	9.80622e-05	0.000430983	37.4823	1.90633	0.227532	7041800	4164700	7724600	22329000	1650500000	1849700000	3454200000	0.0025233	0.00417614	0.0064643	1.69083	1.65503	0.64603	26068000	64709000	32272000	22159000	2634800000	1335600000	1781200000	0.0245594	0.0241629	0.0124405	0.40285	0.983858	1.94228	22547000	53475000	58080000	59442000	1584900000	2579400000	2056500000	0.0337403
Voltage-dependent anion-selective channel protein 1	VDAC1		0	0	69776	1141700	3763400000	3519500000	2541400000	0	1.98255e-05	0.000449241	0	∞	0.0441312	0	7169300	2645300	5533000	1650500000	1849700000	3454200000	0.00434371	0.00143012	0.00160182	0	0.32924	0.892813	5176000	48622000	8473900	1587500	2634800000	1335600000	1781200000	0.0184538	0.00634464	0.000891253	0.106454	0.343813	7.11879	2171200	1541000	21401000	14502000	1584900000	2579400000	2056500000	0.000972301
Serine/threonine-protein phosphatase PGAM5, mitochondrial	PGAM5		0	85965	0	1175800	3763400000	3519500000	2541400000	2.28424e-05	0	0.000462658	0	0	0	2731100	0	4822900	3793000	1650500000	1849700000	3454200000	0	0.0026074	0.00109808	∞	∞	2.3745	0	0	0	0	2634800000	1335600000	1781200000	0	0	0	0	0	0	0	0	0	0	1584900000	2579400000	2056500000	0
Protein phosphatase 1B	PPM1B		3206100	9903800	3486800	1293900	3763400000	3519500000	2541400000	0.00263161	0.000990709	0.000509129	0.323724	0.376465	1.94589	0	7505600	50418	0	1650500000	1849700000	3454200000	0.00454747	2.72574e-05	0	0	0.00599397	∞	20825000	17064000	13996000	10731000	2634800000	1335600000	1781200000	0.00647639	0.0104792	0.00602459	1.22041	1.61806	1.7394	24211000	34354000	35606000	31557000	1584900000	2579400000	2056500000	0.0216758
4F2 cell-surface antigen heavy chain	SLC3A2		4125900	0	3271000	1551200	3763400000	3519500000	2541400000	0	0.000929393	0.000610372	∞	∞	1.52267	0	963830	973790	2327000	1650500000	1849700000	3454200000	0.000583962	0.000526458	0.000673673	0	0.901528	0.781475	3763400	577990	1111200	0	2634800000	1335600000	1781200000	0.000219368	0.000831986	0	6.51119	3.79265	∞	6478900	1491800	1820000	1986400	1584900000	2579400000	2056500000	0.000941258
Glyceraldehyde-3-phosphate dehydrogenase	GAPDH		47070000	15578000	6575700	1667700	3763400000	3519500000	2541400000	0.00413934	0.00186836	0.000656213	3.02157	0.451367	2.84719	18279000	49582000	40957000	3440800	1650500000	1849700000	3454200000	0.0300406	0.0221425	0.000996121	0.368662	0.737086	22.2287	52078000	264580000	91917000	47760000	2634800000	1335600000	1781200000	0.100417	0.0688208	0.0268134	0.196833	0.685346	2.56666	136260000	3966700	79932000	67682000	1584900000	2579400000	2056500000	0.00250281
Desmocollin-1	DSC1		1862300	3129300	0	1755500	3763400000	3519500000	2541400000	0.000831509	0	0.000690761	0.595117	0	0	0	14869000	2673500	0	1650500000	1849700000	3454200000	0.00900879	0.00144537	0	0	0.16044	∞	0	2003000	0	0	2634800000	1335600000	1781200000	0.00076021	0	0	0	0	0	126960	4564400	4154400	2726600	1584900000	2579400000	2056500000	0.00287993
Myosin light polypeptide 6	MYL6		57505	0	0	1784800	3763400000	3519500000	2541400000	0	0	0.00070229	∞	0	0	4977400	60733000	4561900	377790	1650500000	1849700000	3454200000	0.0367967	0.00246629	0.000109371	0.0819554	0.0670248	22.5497	121950000	241290000	222230000	391260000	2634800000	1335600000	1781200000	0.0915781	0.16639	0.219661	0.505408	1.81691	0.757484	174010000	134300000	205660000	1028000000	1584900000	2579400000	2056500000	0.0847372
Melanoma-associated antigen F1	MAGEF1		140910000	10138000	9278000	1829300	3763400000	3519500000	2541400000	0.00269384	0.00263617	0.0007198	13.8992	0.978592	3.66236	1662800000	9907500000	192380000	114210000	1650500000	1849700000	3454200000	6.00273	0.104006	0.0330641	0.167832	0.0173265	3.14559	27277000000	13345000000	13934000000	39115000000	2634800000	1335600000	1781200000	5.0649	10.4328	21.9599	2.04399	2.05982	0.475082	12141000000	21052000000	30060000000	11909000000	1584900000	2579400000	2056500000	13.2829
Large neutral amino acids transporter small subunit 1	SLC7A5		0	0	0	1870500	3763400000	3519500000	2541400000	0	0	0.000736012	0	0	0	0	0	0	3095500	1650500000	1849700000	3454200000	0	0	0.000896155	0	0	0	3022900	2322800	1613800	0	2634800000	1335600000	1781200000	0.000881585	0.0012083	0	1.3014	1.37059	∞	3843200	1621000	2312600	1194700	1584900000	2579400000	2056500000	0.00102278
Heterogeneous nuclear ribonucleoprotein H;Heterogeneous nuclear ribonucleoprotein H, N-terminally processed	HNRNPH1		23240000	14375000	15048000	2122600	3763400000	3519500000	2541400000	0.00381968	0.00427561	0.000835209	1.6167	1.11936	5.11921	16418000	23896000	8358400	5501000	1650500000	1849700000	3454200000	0.014478	0.00451879	0.00159255	0.687061	0.312113	2.83745	54932000	42088000	39063000	39481000	2634800000	1335600000	1781200000	0.0159739	0.0292475	0.0221654	1.30517	1.83096	1.31951	42148000	44457000	37153000	25426000	1584900000	2579400000	2056500000	0.0280504
Aflatoxin B1 aldehyde reductase member 2	AKR7A2		0	0	0	2161000	3763400000	3519500000	2541400000	0	0	0.000850319	0	0	0	1747000	0	0	0	1650500000	1849700000	3454200000	0	0	0	∞	0	0	49267000	42730000	51159000	39967000	2634800000	1335600000	1781200000	0.0162175	0.0383041	0.0224382	1.15298	2.36189	1.70709	37664000	30144000	28605000	39559000	1584900000	2579400000	2056500000	0.0190195
ADP-ribosylation factor 4	ARF4		0	0	145320	2301100	3763400000	3519500000	2541400000	0	4.129e-05	0.000905446	0	∞	0.0456018	1535600	5997200	750440	3183900	1650500000	1849700000	3454200000	0.00363357	0.000405709	0.000921747	0.256053	0.111656	0.440152	6481000	14097000	5003700	7001800	2634800000	1335600000	1781200000	0.00535031	0.00374641	0.00393095	0.459743	0.700222	0.953055	10314000	18371000	18606000	21159000	1584900000	2579400000	2056500000	0.0115913
Thyroid hormone receptor-associated protein 3	THRAP3		12212000	5035100	5527800	2368400	3763400000	3519500000	2541400000	0.00133791	0.00157062	0.000931927	2.42537	1.17393	1.68535	30603000	5772200	10377000	2860000	1650500000	1849700000	3454200000	0.00349724	0.0056101	0.000827978	5.30179	1.60415	6.77567	1055100	14394000	4644200	3776100	2634800000	1335600000	1781200000	0.00546303	0.00347724	0.00211998	0.0733014	0.636503	1.64023	2038200	31687000	21011000	16932000	1584900000	2579400000	2056500000	0.0199931
78 kDa glucose-regulated protein	HSPA5		2543200	130080	7811800	2719300	3763400000	3519500000	2541400000	3.45645e-05	0.00221958	0.00107	19.551	64.2155	2.07437	8789300	34801000	9154400	13051000	1650500000	1849700000	3454200000	0.0210851	0.00494913	0.0037783	0.252559	0.234721	1.30988	4614600	38211000	20115000	22038000	2634800000	1335600000	1781200000	0.0145024	0.0150606	0.0123726	0.120766	1.03849	1.21726	28944000	13882000	34426000	37690000	1584900000	2579400000	2056500000	0.00875891
ATP-dependent 6-phosphofructokinase, platelet type	PFKP		0	0	0	2773900	3763400000	3519500000	2541400000	0	0	0.00109149	0	0	0	0	1707200	0	5305200	1650500000	1849700000	3454200000	0.00103435	0	0.00153587	0	0	0	0	1360400	724400	0	2634800000	1335600000	1781200000	0.00051632	0.000542378	0	0	1.05047	∞	8433900	4208700	7217000	10532000	1584900000	2579400000	2056500000	0.0026555
Histone deacetylase 2	HDAC2		4816200	0	2810600	2813800	3763400000	3519500000	2541400000	0	0.000798579	0.00110719	∞	∞	0.72127	21414000	0	17808000	5982600	1650500000	1849700000	3454200000	0	0.00962751	0.00173198	∞	∞	5.55868	0	1470100	0	0	2634800000	1335600000	1781200000	0.000557955	0	0	0	0	0	659120	4543600	5999300	4719600	1584900000	2579400000	2056500000	0.00286681
Myosin-9	MYH9		8200200	5176700	34133000	4231000	3763400000	3519500000	2541400000	0.00137554	0.00969825	0.00166483	1.58406	7.05052	5.82537	2000100	368210000	9699100	1936800	1650500000	1849700000	3454200000	0.22309	0.00524361	0.000560709	0.00543195	0.0235044	9.35175	0	3752300	1527200	3405200	2634800000	1335600000	1781200000	0.00142413	0.00114346	0.00191174	0	0.802915	0.598122	338670000	30034000	41506000	153950000	1584900000	2579400000	2056500000	0.0189501
Mitogen-activated protein kinase kinase kinase 7	MAP3K7		0	1324800	1627400	5712300	3763400000	3519500000	2541400000	0.000352022	0.000462395	0.0022477	0	1.31354	0.205719	0	2583400	1529200	3925300	1650500000	1849700000	3454200000	0.00156522	0.000826729	0.00113638	0	0.528186	0.727508	0	0	0	37301	2634800000	1335600000	1781200000	0	0	2.09415e-05	0	0	0	0	0	0	0	1584900000	2579400000	2056500000	0
Plectin	PLEC		0	3259900	0	8258800	3763400000	3519500000	2541400000	0.000866211	0	0.0032497	0	0	0	9235500	37686000	16415000	1494800	1650500000	1849700000	3454200000	0.0228331	0.00887441	0.000432749	0.245064	0.388665	20.5071	3517300	0	0	0	2634800000	1335600000	1781200000	0	0	0	∞	0	0	761500	318930	1146200	0	1584900000	2579400000	2056500000	0.00020123
Tyrosine-protein kinase JAK1	JAK1		3566900	3317900	3625200	9456800	3763400000	3519500000	2541400000	0.000881623	0.00103003	0.0037211	1.07505	1.16834	0.276809	10534000	34117000	4553100	9463200	1650500000	1849700000	3454200000	0.0206707	0.00246153	0.00273962	0.308761	0.119083	0.898494	21085000	7597000	12641000	9021500	2634800000	1335600000	1781200000	0.00288333	0.00946466	0.00506484	2.77544	3.28254	1.8687	41311000	45035000	14206000	8570900	1584900000	2579400000	2056500000	0.028415
Vimentin	VIM		41843000	14515000	10804000	12813000	3763400000	3519500000	2541400000	0.00385688	0.00306975	0.00504171	2.88274	0.795915	0.608872	70947000	105030000	37806000	44975000	1650500000	1849700000	3454200000	0.0636353	0.020439	0.0130204	0.675493	0.32119	1.56977	1567000	1249400	4811800	3940400	2634800000	1335600000	1781200000	0.000474192	0.00360273	0.00221222	1.2542	7.59762	1.62856	367730	952600	12864000	29553000	1584900000	2579400000	2056500000	0.000601047
Enhancer of rudimentary homolog	ERH		8448500	0	15819000	15348000	3763400000	3519500000	2541400000	0	0.00449467	0.00603919	∞	∞	0.744251	18317000	33101000	2749200	16204000	1650500000	1849700000	3454200000	0.0200551	0.0014863	0.0046911	0.553367	0.0741105	0.316833	20737000	49882000	49505000	79601000	2634800000	1335600000	1781200000	0.018932	0.0370657	0.0446895	0.415721	1.95784	0.829405	14835000	65988000	79717000	92603000	1584900000	2579400000	2056500000	0.0416354
Putative elongation factor 1-alpha-like 3;Elongation factor 1-alpha 1;Elongation factor 1-alpha 2	EEF1A1P5;EEF1A1;EEF1A2		131530000	64517000	78688000	37155000	3763400000	3519500000	2541400000	0.0171433	0.0223577	0.0146199	2.03869	1.30417	1.52927	94303000	106990000	87279000	94237000	1650500000	1849700000	3454200000	0.0648228	0.0471855	0.0272819	0.881419	0.727915	1.72956	154700000	310470000	247160000	898650000	2634800000	1335600000	1781200000	0.117834	0.185055	0.504519	0.498277	1.57047	0.366795	291610000	178400000	238090000	281800000	1584900000	2579400000	2056500000	0.112562
Phosphate carrier protein, mitochondrial	SLC25A3		6642900	34486000	52082000	52854000	3763400000	3519500000	2541400000	0.00916352	0.0147981	0.0207972	0.192626	1.61489	0.711544	12800000	4117900	15348000	7068900	1650500000	1849700000	3454200000	0.00249494	0.00829756	0.00204647	3.10838	3.32575	4.05458	17445000	19017000	6347200	26104000	2634800000	1335600000	1781200000	0.00721763	0.00475232	0.0146553	0.917337	0.658433	0.324273	34528000	58428000	51494000	59540000	1584900000	2579400000	2056500000	0.0368654
Actin, cytoplasmic 2;Actin, cytoplasmic 2, N-terminally processed;Actin, cytoplasmic 1;Actin, cytoplasmic 1, N-terminally processed	ACTG1;ACTB		266680000	118740000	199830000	70579000	3763400000	3519500000	2541400000	0.0315513	0.056778	0.0277717	2.24592	1.79955	2.04445	219530000	1420000000	306140000	388540000	1650500000	1849700000	3454200000	0.860345	0.165508	0.112483	0.154599	0.192374	1.4714	844960000	3732400000	1397900000	1209200000	2634800000	1335600000	1781200000	1.41658	1.04665	0.678868	0.226385	0.738855	1.54175	2153800000	1153700000	1742900000	3832900000	1584900000	2579400000	2056500000	0.727932
Serine/threonine-protein kinase 38	STK38		205840000	102700000	125120000	98914000	3763400000	3519500000	2541400000	0.0272892	0.0355505	0.0389211	2.00428	1.30273	0.9134	222090000	154010000	126930000	201870000	1650500000	1849700000	3454200000	0.0933111	0.0686219	0.0584419	1.44205	0.73541	1.17419	516450000	632350000	321370000	357470000	2634800000	1335600000	1781200000	0.239999	0.240618	0.200691	0.816715	1.00258	1.19895	292670000	426150000	401240000	419740000	1584900000	2579400000	2056500000	0.268881
Histone deacetylase 1	HDAC1		2703900	3763400000	3519500000	2541400000	3763400000	3519500000	2541400000	1	1	1	0.000718473	1	1	0	1650500000	1849700000	3454200000	1650500000	1849700000	3454200000	1	1	1	0	1	1	1479300	2634800000	1335600000	1781200000	2634800000	1335600000	1781200000	1	1	1	0.000561447	1	1	102590	1584900000	2579400000	2056500000	1584900000	2579400000	2056500000	1
[truncated: 19 more columns]

## Sheet: S1C. Nuclear Substrate Hits
Table S1C. 12 nuclear substrate hit proteins from MCF-10a cells
Enriched proteins from Table S1B showing nuclear localization (see column E)
The number of trials where each proteins shows at least 2-fold higher enrichment in mutant compared to wild type, with also higher intensity in wild type compared to the no protein control or mutant compared to mutant + SAHA, is shown in column D.
The color coding of each row corresponds to the number of trials where that protein was enriched: 2 trials (grey highlight)
Protein names	Gene names	Protein ID	Number of trials enriched	Cellular Localization
Histone-binding protein RBBP4	RBBP4	Q09028	2	N
Chromodomain-helicase-DNA-binding protein 4;Chromodomain-helicase-DNA-binding protein 5	CHD4;CHD5	Q14839;Q8TDI0	2	N
Keratin, type I cytoskeletal 18	KRT18	P05783	2	N
ELM2 and SANT domain-containing protein 1	ELMSAN1	Q6PJG2	2	N
Probable ATP-dependent RNA helicase DDX41	DDX41	Q9UJV9	2	N
Small nuclear ribonucleoprotein F	SNRPF	P62306	2	N/C
Y-box-binding protein 3	YBX3	P16989	2	N/C
Nucleolin	NCL	P19338	2	N/C
Sin3 histone deacetylase corepressor complex component SDS3	SUDS3	Q9H7L9	2	N
Deoxynucleoside triphosphate triphosphohydrolase SAMHD1	SAMHD1	Q9Y3Z3	2	N
Emerin	EMD	P50402	2	N
Histone H4	HIST1H4A	P62805	2	N

## Sheet: S1D.All Associated Protein Hits
Table S1D. 28 associated protein hits from MCF10A cells
Raw values from MaxQuant label-free quantitation used in this table were taken from Table S1A: Trial 2- columns D-G; Trial 3- columns Q-T; Trial 4- columns AD-AG; Trial 5- columns AQ-AT; Trial 6- columns BD-BG
Raw data were first normalized (indicated by "WT norm", "MT norm", and MT+SA norm" for each trial) to the levels of HDAC1 in that trial (indicated by "HD1 WT", "HD1 Mutant", or "HD1 Mutant + SAHA")
Next, the normalized values were compared to yield fold enrichment ratios: No protein control divided by wild type; mutant divided by wild type; mutant divided by mutant+ SAHA (see orange highlighted columns for each trial)
The number of trials where each protein shows a ratio of mutant to WT and a ratio of mutant to mutant + SAHA between 0.56 and 1.8, with also higher intensity in wild type compared to the no protein control, is shown in column BQ (blue highlight)
In a case where the wild type or mutant+SAHA sample contained no intensity signal, an infinity (∞) sign is shown.
The 28 proteins hits are listed in order of number of trials showing the minimal enrichment described above.
The color coding of each protein name corresponds to the number of trials where that protein was enriched: 4 trials (green), 3 trials (yellow) or 2 trials (grey)
Finally, potential protein hits were analyzed for their cellular localization (column C: N- Nucleus, C- Cytoplasm, M- Mitochondria, Mem- Membrane, ER- Endoplasmic reticulum, N/A- not available)
Protein names	Gene names	Localization	Trial 2- No protein	Trial 2- WT	Trial 2- MUT	Trial 2- MUT+SAHA	HD1 WT	HD1 MUT	HD1 MUT+SAHA	WT norm	MT norm	MT + SA norm	Trial 2- IgG/WT	Trial 2- MT/WT	Trial 2- MT/SAHA	Trial 3- No protein	Trial 3- WT	Trial 3- MUT	Trial 3- MUT+SAHA	HD1 WT	HD1 Mutant	HD1 Mutant+SAHA	WT norm	MT norm	MT + SA norm	Trial 3- IgG/WT	Trial 3- MT/WT	Trial 3- MT/SAHA	Trial 4- No protein	Trial 4- WT	Trial 4- MUT	Trial 4- MUT+SAHA	HD1 WT	HD1 Mutant	HD1 Mutant+SAHA	WT norm	MT norm	MT +SA norm	Trial 4- IgG/WT	Trial 4- MT/WT	Trial 4- MT/SAHA	Trial 5- No protein	Trial 5- WT	Trial 5- MUT	Trial 5- MUT+SAHA	HD1 WT	HD1 Mutant	HD1 Mutant+SAHA	WT norm
REST corepressor 1	RCOR1	N	0	4776700	3988900	4239600	3763400000	3519500000	2541400000	0.00126925	0.00113337	0.00166821	0	0.892945	0.679392	0	2781800	4801100	2999200	1650500000	1849700000	3454200000	0.00168543	0.00259561	0.000868276	0	1.54003	2.98938	0	3366400	1260300	1488600	2634800000	1335600000	1781200000	0.00127767	0.000943621	0.000835729	0	0.738549	1.1291	0	1954600	4011200	3440700	1584900000	2579400000	2056500000	0.00123326
Protein arginine N-methyltransferase 5;Protein arginine N-methyltransferase 5, N-terminally processed	PRMT5	N	647070000	700510000	553400000	588770000	3763400000	3519500000	2541400000	0.186138	0.157238	0.231672	0.923713	0.844742	0.678712	1206200000	965840000	832820000	1315500000	1650500000	1849700000	3454200000	0.58518	0.450246	0.380841	1.24886	0.769414	1.18224	3477700000	4309600000	3386900000	3332500000	2634800000	1335600000	1781200000	1.63565	2.53586	1.87093	0.806966	1.55037	1.3554	2474900000	2605100000	2866400000	2852700000	1584900000	2579400000	2056500000	1.6437
Metastasis-associated protein MTA2	MTA2	N	0	119440000	137220000	64924000	3763400000	3519500000	2541400000	0.0317373	0.0389885	0.0255465	0	1.22848	1.52617	20506000	28361000	99528000	90247000	1650500000	1849700000	3454200000	0.0171833	0.0538076	0.0261267	0.723035	3.1314	2.05949	4829900	59412000	28444000	43728000	2634800000	1335600000	1781200000	0.022549	0.0212968	0.0245497	0.081295	0.944469	0.867496	1363200	56883000	128480000	116030000	1584900000	2579400000	2056500000	0.0358906
Serine/threonine-protein kinase 38	STK38	N/C	205840000	102700000	125120000	98914000	3763400000	3519500000	2541400000	0.0272892	0.0355505	0.0389211	2.00428	1.30273	0.9134	222090000	154010000	126930000	201870000	1650500000	1849700000	3454200000	0.0933111	0.0686219	0.0584419	1.44205	0.73541	1.17419	516450000	632350000	321370000	357470000	2634800000	1335600000	1781200000	0.239999	0.240618	0.200691	0.816715	1.00258	1.19895	292670000	426150000	401240000	419740000	1584900000	2579400000	2056500000	0.268881
Ubiquitin-like protein ISG15	ISG15	C	0	12069000	3876900	23543000	3763400000	3519500000	2541400000	0.00320694	0.00110155	0.00926379	0	0.343489	0.118909	0	16425000	14837000	15221000	1650500000	1849700000	3454200000	0.00995153	0.0080213	0.00440652	0	0.806037	1.82033	0	25826000	10341000	23042000	2634800000	1335600000	1781200000	0.00980188	0.00774259	0.0129362	0	0.789908	0.59852	761210	14479000	20854000	12267000	1584900000	2579400000	2056500000	0.00913559
Ig kappa chain V-IV region Len;Ig kappa chain V-IV region;Ig kappa chain V-IV region JI;Ig kappa chain V-IV region B17;Ig kappa chain V-IV region STH	IGKV4-1	Secreted	45304	69919	2908900	0	3763400000	3519500000	2541400000	1.85787e-05	0.000826509	0	0.64795	44.487	∞	3296500	0	30180000	1312300	1650500000	1849700000	3454200000	0	0.0163162	0.000379914	∞	∞	42.9469	25660000	27944000	21079000	21178000	2634800000	1335600000	1781200000	0.0106057	0.0157824	0.0118897	0.918265	1.4881	1.3274	10004000	13492000	16091000	17117000	1584900000	2579400000	2056500000	0.00851284
Histone H2A type 1-J;Histone H2A type 1-H;Histone H2A.J;Histone H2A type 1-C;Histone H2A type 3;Histone H2A type 1-D;Histone H2A type 1;Histone H2A type 1-B/E;Histone H2AX;Histone H2A type 2-B	HIST1H2AJ;HIST1H2AH;H2AFJ;HIST1H2AC;HIST3H2A;HIST1H2AD;HIST1H2AG;HIST1H2AB;H2AFX;HIST2H2AB	N/C	982460	170820	1308400	3089900	3763400000	3519500000	2541400000	4.53898e-05	0.000371757	0.00121583	5.75143	8.19033	0.305765	23164000	27885000	24051000	36315000	1650500000	1849700000	3454200000	0.0168949	0.0130026	0.0105133	0.830698	0.769621	1.23678	0	12086000	6312000	12888000	2634800000	1335600000	1781200000	0.00458707	0.00472597	0.00723557	0	1.03028	0.653157	0	5233000	25236000	36126000	1584900000	2579400000	2056500000	0.00330179
Transcriptional repressor p66-beta	GATAD2B	N	0	44781000	24012000	23585000	3763400000	3519500000	2541400000	0.0118991	0.00682256	0.00928032	0	0.573369	0.735164	0	2146200	30041000	40304000	1650500000	1849700000	3454200000	0.00130033	0.016241	0.0116681	0	12.4899	1.39191	0	13031000	11490000	39439000	2634800000	1335600000	1781200000	0.00494573	0.00860288	0.0221418	0	1.73946	0.388535	0	24709000	50361000	33280000	1584900000	2579400000	2056500000	0.0155903
Methylosome protein 50	WDR77	N/C	9509900	0	2390000	2172500	3763400000	3519500000	2541400000	0	0.000679074	0.000854844	∞	∞	0.794383	146930000	297060000	129780000	123370000	1650500000	1849700000	3454200000	0.179982	0.0701627	0.0357159	0.494614	0.389832	1.96447	1402500000	1590700000	1280100000	1537800000	2634800000	1335600000	1781200000	0.603727	0.958446	0.863351	0.881687	1.58755	1.11015	548560000	611570000	726850000	778730000	1584900000	2579400000	2056500000	0.385873
Tryptophan--tRNA ligase, cytoplasmic;T1-TrpRS;T2-TrpRS	WARS	C	46095	0	0	0	3763400000	3519500000	2541400000	0	0	0	∞	0	0	0	97912	2120200	1446300	1650500000	1849700000	3454200000	5.93226e-05	0.00114624	0.000418708	0	19.3221	2.73757	0	39692000	19452000	15807000	2634800000	1335600000	1781200000	0.0150645	0.0145642	0.00887435	0	0.966791	1.64116	4402300	9788600	18837000	15866000	1584900000	2579400000	2056500000	0.00617616
Tubulin beta-3 chain	TUBB3	C	54087	0	802600	0	3763400000	3519500000	2541400000	0	0.000228044	0	∞	∞	∞	3944900	6815700	5428400	12628000	1650500000	1849700000	3454200000	0.00412948	0.00293475	0.00365584	0.578796	0.710682	0.802756	4168000	0	5663600	12714000	2634800000	1335600000	1781200000	0	0.00424049	0.00713788	∞	∞	0.594082	3767700	9070700	22150000	19688000	1584900000	2579400000	2056500000	0.0057232
Tubulin beta-2B chain;Tubulin beta-2A chain	TUBB2B;TUBB2A	C	0	0	2160700	4823800	3763400000	3519500000	2541400000	0	0.000613922	0.00189809	0	∞	0.323443	0	0	6115600	3968400	1650500000	1849700000	3454200000	0	0.00330627	0.00114886	0	∞	2.87786	0	0	0	0	2634800000	1335600000	1781200000	0	0	0	0	0	0	2509200	2784200	4683300	5210800	1584900000	2579400000	2056500000	0.0017567
Transmembrane protein 33	TMEM33	ER	0	1552200	1417700	659970	3763400000	3519500000	2541400000	0.000412446	0.000402813	0.000259688	0	0.976644	1.55114	0	0	5391000	0	1650500000	1849700000	3454200000	0	0.00291453	0	0	∞	∞	0	2063400	1952300	3094400	2634800000	1335600000	1781200000	0.000783133	0.00146174	0.00173726	0	1.86653	0.841407	1816300	2014900	3641400	2450200	1584900000	2579400000	2056500000	0.00127131
Thyroid hormone receptor-associated protein 3	THRAP3	N	12212000	5035100	5527800	2368400	3763400000	3519500000	2541400000	0.00133791	0.00157062	0.000931927	2.42537	1.17393	1.68535	30603000	5772200	10377000	2860000	1650500000	1849700000	3454200000	0.00349724	0.0056101	0.000827978	5.30179	1.60415	6.77567	1055100	14394000	4644200	3776100	2634800000	1335600000	1781200000	0.00546303	0.00347724	0.00211998	0.0733014	0.636503	1.64023	2038200	31687000	21011000	16932000	1584900000	2579400000	2056500000	0.0199931
Small nuclear ribonucleoprotein Sm D1	SNRPD1	N/C	397520	0	0	0	3763400000	3519500000	2541400000	0	0	0	∞	0	0	5755700	10349000	3768700	5262600	1650500000	1849700000	3454200000	0.00627022	0.00203747	0.00152354	0.55616	0.324943	1.33733	20829000	55897000	47888000	29812000	2634800000	1335600000	1781200000	0.0212149	0.035855	0.016737	0.372632	1.69009	2.14226	4724100	29001000	30036000	42279000	1584900000	2579400000	2056500000	0.0182983
40S ribosomal protein S18	RPS18	C	18776000	15912000	15780000	8585200	3763400000	3519500000	2541400000	0.00422809	0.00448359	0.00337814	1.17999	1.06043	1.32724	20941000	52320000	46366000	20522000	1650500000	1849700000	3454200000	0.0316995	0.0250668	0.00594117	0.400248	0.790763	4.21916	32367000	22035000	55026000	39736000	2634800000	1335600000	1781200000	0.00836306	0.0411995	0.0223086	1.46889	4.92636	1.8468	16522000	20538000	33231000	19816000	1584900000	2579400000	2056500000	0.0129585
Plasminogen;Plasmin heavy chain A;Activation peptide;Angiostatin;Plasmin heavy chain A, short form;Plasmin light chain B	PLG	Secreted	2981500	0	0	4439900	3763400000	3519500000	2541400000	0	0	0.00174703	∞	0	0	5670000	5850900	8236700	15026000	1650500000	1849700000	3454200000	0.00354493	0.00445299	0.00435007	0.969082	1.25616	1.02366	4867100	11848000	9616500	7566400	2634800000	1335600000	1781200000	0.00449674	0.00720013	0.00424792	0.410795	1.60119	1.69498	11070000	14384000	12214000	10731000	1584900000	2579400000	2056500000	0.00907565
Metastasis-associated protein MTA3	MTA3	N	3809000	3750700	0	2785300	3763400000	3519500000	2541400000	0.000996625	0	0.00109597	1.01554	0	0	0	0	1129500	3743400	1650500000	1849700000	3454200000	0	0.00061064	0.00108372	0	∞	0.563464	0	0	0	0	2634800000	1335600000	1781200000	0	0	0	0	0	0	0	1387900	2720100	2646100	1584900000	2579400000	2056500000	0.000875702
Methyl-CpG-binding domain protein 2	MBD2	N	0	77464	611470	92228	3763400000	3519500000	2541400000	2.05835e-05	0.000173738	3.62902e-05	0	8.44063	4.78745	0	6988600	112900	10043000	1650500000	1849700000	3454200000	0.00423423	6.10369e-05	0.00290747	0	0.0144151	0.0209931	0	7827800	6619600	5980700	2634800000	1335600000	1781200000	0.00297093	0.00495627	0.00335768	0	1.66826	1.4761	0	4266200	8685100	7262400	1584900000	2579400000	2056500000	0.00269178
Stress-70 protein, mitochondrial	HSPA9	N/M	13557000	55442	16422000	9323600	3763400000	3519500000	2541400000	1.47319e-05	0.004666	0.00366869	244.526	316.728	1.27185	2952000	6501100	11122000	18625000	1650500000	1849700000	3454200000	0.00393887	0.00601287	0.00539199	0.454077	1.52655	1.11515	8309400	23676000	13613000	24953000	2634800000	1335600000	1781200000	0.00898588	0.0101924	0.0140091	0.350963	1.13427	0.727558	35347000	10614000	29494000	24260000	1584900000	2579400000	2056500000	0.00669695
Heterogeneous nuclear ribonucleoprotein F;Heterogeneous nuclear ribonucleoprotein F, N-terminally processed	HNRNPF	N	0	2316900	3086300	3441400	3763400000	3519500000	2541400000	0.00061564	0.000876914	0.00135414	0	1.42439	0.647582	0	2834500	4054200	4244000	1650500000	1849700000	3454200000	0.00171736	0.00219181	0.00122865	0	1.27627	1.78392	0	0	642750	0	2634800000	1335600000	1781200000	0	0.000481244	0	0	∞	∞	691740	568240	1125700	591240	1584900000	2579400000	2056500000	0.000358534
Histone deacetylase 2	HDAC2	N	4816200	0	2810600	2813800	3763400000	3519500000	2541400000	0	0.000798579	0.00110719	∞	∞	0.72127	21414000	0	17808000	5982600	1650500000	1849700000	3454200000	0	0.00962751	0.00173198	∞	∞	5.55868	0	1470100	0	0	2634800000	1335600000	1781200000	0.000557955	0	0	0	0	0	659120	4543600	5999300	4719600	1584900000	2579400000	2056500000	0.00286681
Enhancer of rudimentary homolog	ERH	N/A	8448500	0	15819000	15348000	3763400000	3519500000	2541400000	0	0.00449467	0.00603919	∞	∞	0.744251	18317000	33101000	2749200	16204000	1650500000	1849700000	3454200000	0.0200551	0.0014863	0.0046911	0.553367	0.0741105	0.316833	20737000	49882000	49505000	79601000	2634800000	1335600000	1781200000	0.018932	0.0370657	0.0446895	0.415721	1.95784	0.829405	14835000	65988000	79717000	92603000	1584900000	2579400000	2056500000	0.0416354
DnaJ homolog subfamily C member 10	DNAJC10	ER	2957000	0	956510	0	3763400000	3519500000	2541400000	0	0.000271774	0	∞	∞	∞	0	0	782870	0	1650500000	1849700000	3454200000	0	0.000423242	0	0	∞	∞	0	145520	0	2706100	2634800000	1335600000	1781200000	5.523e-05	0	0.00151926	0	0	0	0	6159600	5842600	4197700	1584900000	2579400000	2056500000	0.00388643
Cathepsin B;Cathepsin B light chain;Cathepsin B heavy chain	CTSB	Extracellular	4926300	5449900	39217000	29789000	3763400000	3519500000	2541400000	0.00144813	0.0111428	0.0117215	0.903925	7.69459	0.950628	0	14158000	13085000	14927000	1650500000	1849700000	3454200000	0.00857801	0.00707412	0.00432141	0	0.824681	1.637	10347000	14251000	5813900	3061600	2634800000	1335600000	1781200000	0.00540876	0.00435302	0.00171884	0.726054	0.80481	2.53253	6168500	14549000	20524000	26886000	1584900000	2579400000	2056500000	0.00917976
Methylosome subunit pICln	CLNS1A	N/C	11621000	843120	3456700	10373000	3763400000	3519500000	2541400000	0.000224031	0.000982157	0.00408161	13.7833	4.38401	0.24063	23158000	11804000	37381000	9815000	1650500000	1849700000	3454200000	0.00715177	0.0202092	0.00284147	1.96188	2.82576	7.11225	57315000	83104000	91358000	68521000	2634800000	1335600000	1781200000	0.0315409	0.0684022	0.038469	0.689678	2.16868	1.77811	40921000	46338000	45065000	48813000	1584900000	2579400000	2056500000	0.0292372
T-complex protein 1 subunit epsilon	CCT5	C	0	153350000	205430000	89851000	3763400000	3519500000	2541400000	0.0407477	0.0583691	0.0353549	0	1.43245	1.65095	0	64427000	202680000	127080000	1650500000	1849700000	3454200000	0.0390348	0.109575	0.03679	0	2.8071	2.97838	0	97151000	80280000	108800000	2634800000	1335600000	1781200000	0.0368722	0.0601078	0.0610824	0	1.63016	0.984045	2410100	85798000	305780000	241280000	1584900000	2579400000	2056500000	0.0541346
ADP-ribosylation factor 4	ARF4	Golgi	0	0	145320	2301100	3763400000	3519500000	2541400000	0	4.129e-05	0.000905446	0	∞	0.0456018	1535600	5997200	750440	3183900	1650500000	1849700000	3454200000	0.00363357	0.000405709	0.000921747	0.256053	0.111656	0.440152	6481000	14097000	5003700	7001800	2634800000	1335600000	1781200000	0.00535031	0.00374641	0.00393095	0.459743	0.700222	0.953055	10314000	18371000	18606000	21159000	1584900000	2579400000	2056500000	0.0115913
14-3-3 protein beta/alpha;14-3-3 protein beta/alpha, N-terminally processed	YWHAB		0	0	0	0	3763400000	3519500000	2541400000	0	0	0	0	0	0	0	14963000	2728700	5858100	1650500000	1849700000	3454200000	0.00906574	0.00147521	0.00169594	0	0.162724	0.869852	1180200	1919900	3117900	909910	2634800000	1335600000	1781200000	0.00072867	0.00233446	0.000510841	0.61472	3.20372	4.56983	9516800	1657500	6474800	3575600	1584900000	2579400000	2056500000	0.00104581
Vimentin	VIM		41843000	14515000	10804000	12813000	3763400000	3519500000	2541400000	0.00385688	0.00306975	0.00504171	2.88274	0.795915	0.608872	70947000	105030000	37806000	44975000	1650500000	1849700000	3454200000	0.0636353	0.020439	0.0130204	0.675493	0.32119	1.56977	1567000	1249400	4811800	3940400	2634800000	1335600000	1781200000	0.000474192	0.00360273	0.00221222	1.2542	7.59762	1.62856	367730	952600	12864000	29553000	1584900000	2579400000	2056500000	0.000601047
Cytochrome b-c1 complex subunit 2, mitochondrial	UQCRC2		0	0	0	0	3763400000	3519500000	2541400000	0	0	0	0	0	0	0	0	1788900	1747000	1650500000	1849700000	3454200000	0	0.00096713	0.000505761	0	∞	1.91223	0	3491900	857440	2012200	2634800000	1335600000	1781200000	0.0013253	0.000641989	0.00112969	0	0.48441	0.568289	1197600	779510	1412100	869460	1584900000	2579400000	2056500000	0.000491835
Ubiquitin-60S ribosomal protein L40;Ubiquitin;60S ribosomal protein L40;Ubiquitin-40S ribosomal protein S27a;Ubiquitin;40S ribosomal protein S27a;Polyubiquitin-B;Ubiquitin;Polyubiquitin-C;Ubiquitin	UBA52;RPS27A;UBB;UBC		16262000	16741000	22837000	47651000	3763400000	3519500000	2541400000	0.00444837	0.00648871	0.0187499	0.971388	1.45867	0.346066	20479000	31737000	71286000	112380000	1650500000	1849700000	3454200000	0.0192287	0.0385392	0.0325343	0.645272	2.00425	1.18457	11320000	37214000	28035000	35835000	2634800000	1335600000	1781200000	0.014124	0.0209906	0.0201185	0.304187	1.48616	1.04335	19825000	14028000	52503000	69252000	1584900000	2579400000	2056500000	0.00885103
Elongation factor Tu, mitochondrial	TUFM		0	3409100	6511800	3086400	3763400000	3519500000	2541400000	0.000905856	0.00185021	0.00121445	0	2.04249	1.52349	0	1140300	9787600	5589400	1650500000	1849700000	3454200000	0.000690882	0.00529145	0.00161815	0	7.65899	3.27007	16393000	12594000	7633800	4562400	2634800000	1335600000	1781200000	0.00477987	0.00571563	0.00256142	1.30165	1.19577	2.23143	8086900	9744000	13375000	11399000	1584900000	2579400000	2056500000	0.00614802
Tubulin beta-8 chain	TUBB8		0	0	0	0	3763400000	3519500000	2541400000	0	0	0	0	0	0	0	0	0	0	1650500000	1849700000	3454200000	0	0	0	0	0	0	0	8340100	7040100	6771800	2634800000	1335600000	1781200000	0.00316536	0.00527111	0.00380182	0	1.66525	1.38647	5353200	0	12511000	9350900	1584900000	2579400000	2056500000	0
Tubulin beta-4B chain	TUBB4B		54855000	32736000	131170000	62696000	3763400000	3519500000	2541400000	0.00869852	0.0372695	0.0246699	1.67568	4.28458	1.51073	36041000	138300000	174660000	136020000	1650500000	1849700000	3454200000	0.0837928	0.0944261	0.0393781	0.2606	1.1269	2.39793	309460000	339270000	295680000	310190000	2634800000	1335600000	1781200000	0.128765	0.221384	0.174147	0.912135	1.71928	1.27125	271280000	206700000	412820000	418960000	1584900000	2579400000	2056500000	0.130418
Tubulin beta chain	TUBB		3939700	1952200	15563000	4850500	3763400000	3519500000	2541400000	0.000518733	0.00442193	0.00190859	2.01808	8.52449	2.31686	12160000	5118400	50094000	28088000	1650500000	1849700000	3454200000	0.00310112	0.0270822	0.00813155	2.37574	8.73305	3.33051	50750000	68007000	59623000	47575000	2634800000	1335600000	1781200000	0.0258111	0.0446414	0.0267095	0.746247	1.72954	1.67137	44022000	39043000	76197000	82740000	1584900000	2579400000	2056500000	0.0246344
Tropomyosin alpha-3 chain	TPM3		0	0	0	0	3763400000	3519500000	2541400000	0	0	0	0	0	0	0	0	703900	0	1650500000	1849700000	3454200000	0	0.000380548	0	0	∞	∞	4784400	17193000	2237600	3070000	2634800000	1335600000	1781200000	0.00652535	0.00167535	0.00172356	0.278276	0.256745	0.972032	10103000	9828500	11171000	51198000	1584900000	2579400000	2056500000	0.00620134
Very-long-chain enoyl-CoA reductase	TECR		0	0	0	0	3763400000	3519500000	2541400000	0	0	0	0	0	0	380550	0	0	0	1650500000	1849700000	3454200000	0	0	0	∞	0	0	0	1420400	1319700	0	2634800000	1335600000	1781200000	0.000539092	0.000988095	0	0	1.83289	∞	1385200	1057200	2652600	2270000	1584900000	2579400000	2056500000	0.000667045
T-complex protein 1 subunit alpha	TCP1		0	58563000	99663000	45563000	3763400000	3519500000	2541400000	0.0155612	0.0283174	0.0179283	0	1.81974	1.57948	18839000	29526000	155590000	194840000	1650500000	1849700000	3454200000	0.0178891	0.0841163	0.0564067	0.638048	4.70209	1.49125	39018000	66109000	78983000	164280000	2634800000	1335600000	1781200000	0.0250907	0.0591367	0.09223	0.590207	2.35692	0.641188	30163000	87558000	207390000	224060000	1584900000	2579400000	2056500000	0.0552451
TGF-beta-activated kinase 1 and MAP3K7-binding protein 3	TAB3		0	0	0	0	3763400000	3519500000	2541400000	0	0	0	0	0	0	0	945980	1351700	1905100	1650500000	1849700000	3454200000	0.000573148	0.000730767	0.000551531	0	1.27501	1.32498	0	0	0	0	2634800000	1335600000	1781200000	0	0	0	0	0	0	0	0	0	0	1584900000	2579400000	2056500000	0
SUN domain-containing protein 2	SUN2		0	0	0	1186200	3763400000	3519500000	2541400000	0	0	0.000466751	0	0	0	0	466270	920230	1072600	1650500000	1849700000	3454200000	0.000282502	0.000497502	0.000310521	0	1.76106	1.60216	13909000	1872700	1317400	1291200	2634800000	1335600000	1781200000	0.000710756	0.000986373	0.000724905	7.42724	1.38778	1.36069	3751700	2116300	1069400	1806500	1584900000	2579400000	2056500000	0.00133529
Sulfide:quinone oxidoreductase, mitochondrial	SQRDL		0	106370	2090100	0	3763400000	3519500000	2541400000	2.82643e-05	0.000593863	0	0	21.011	∞	0	5670900	7739500	59286	1650500000	1849700000	3454200000	0.00343587	0.00418419	1.71635e-05	0	1.2178	243.785	0	15119000	6952900	11181000	2634800000	1335600000	1781200000	0.0057382	0.00520583	0.00627723	0	0.907223	0.829319	3451600	3070400	12130000	9628500	1584900000	2579400000	2056500000	0.00193728
Small nuclear ribonucleoprotein-associated protein N;Small nuclear ribonucleoprotein-associated proteins B and B	SNRPN;SNRPB		0	0	232120	53607	3763400000	3519500000	2541400000	0	6.59526e-05	2.10935e-05	0	∞	3.12668	0	0	0	59317	1650500000	1849700000	3454200000	0	0	1.71724e-05	0	0	0	0	13194000	12454000	11128000	2634800000	1335600000	1781200000	0.00500759	0.00932465	0.00624747	0	1.8621	1.49255	7145200	6797100	11853000	11278000	1584900000	2579400000	2056500000	0.00428866
Small nuclear ribonucleoprotein Sm D3	SNRPD3		0	0	80746	0	3763400000	3519500000	2541400000	0	2.29425e-05	0	0	∞	∞	3016300	14243000	0	0	1650500000	1849700000	3454200000	0.00862951	0	0	0.211774	0	0	10500000	23577000	14570000	12236000	2634800000	1335600000	1781200000	0.00894831	0.010909	0.00686953	0.445349	1.21911	1.58802	6333800	12265000	10998000	11709000	1584900000	2579400000	2056500000	0.00773866
Small nuclear ribonucleoprotein Sm D2	SNRPD2		2520000	4640400	3620000	4296800	3763400000	3519500000	2541400000	0.00123303	0.00102856	0.00169072	0.543057	0.834166	0.608353	0	4733100	5873600	3919700	1650500000	1849700000	3454200000	0.00286768	0.00317543	0.00113476	0	1.10732	2.79832	9458300	29733000	30092000	6737600	2634800000	1335600000	1781200000	0.0112847	0.0225307	0.00378262	0.318108	1.99657	5.95638	5766600	15487000	14747000	6423200	1584900000	2579400000	2056500000	0.00977159
4F2 cell-surface antigen heavy chain	SLC3A2		4125900	0	3271000	1551200	3763400000	3519500000	2541400000	0	0.000929393	0.000610372	∞	∞	1.52267	0	963830	973790	2327000	1650500000	1849700000	3454200000	0.000583962	0.000526458	0.000673673	0	0.901528	0.781475	3763400	577990	1111200	0	2634800000	1335600000	1781200000	0.000219368	0.000831986	0	6.51119	3.79265	∞	6478900	1491800	1820000	1986400	1584900000	2579400000	2056500000	0.000941258
ADP/ATP translocase 2;ADP/ATP translocase 2, N-terminally processed	SLC25A5		20355000	31568000	112600000	75447000	3763400000	3519500000	2541400000	0.00838816	0.0319932	0.0296872	0.644799	3.81409	1.07768	15953000	28410000	217480000	71311000	1650500000	1849700000	3454200000	0.017213	0.117576	0.0206447	0.561528	6.83065	5.6952	102550000	102430000	141430000	217590000	2634800000	1335600000	1781200000	0.0388758	0.105892	0.122159	1.00117	2.72387	0.86684	33476000	83939000	234200000	190360000	1584900000	2579400000	2056500000	0.0529617
Phosphate carrier protein, mitochondrial	SLC25A3		6642900	34486000	52082000	52854000	3763400000	3519500000	2541400000	0.00916352	0.0147981	0.0207972	0.192626	1.61489	0.711544	12800000	4117900	15348000	7068900	1650500000	1849700000	3454200000	0.00249494	0.00829756	0.00204647	3.10838	3.32575	4.05458	17445000	19017000	6347200	26104000	2634800000	1335600000	1781200000	0.00721763	0.00475232	0.0146553	0.917337	0.658433	0.324273	34528000	58428000	51494000	59540000	1584900000	2579400000	2056500000	0.0368654
Mitochondrial 2-oxoglutarate/malate carrier protein	SLC25A11		0	0	11400000	8999000	3763400000	3519500000	2541400000	0	0.0032391	0.00354096	0	∞	0.914751	582370	0	0	10515000	1650500000	1849700000	3454200000	0	0	0.00304412	∞	0	0	5049700	20574000	19604000	7706600	2634800000	1335600000	1781200000	0.00780856	0.014678	0.00432663	0.245441	1.87974	3.39249	3286200	6047900	13221000	11733000	1584900000	2579400000	2056500000	0.00381595
Paired amphipathic helix protein Sin3a	SIN3A		0	8093500	10338000	7008800	3763400000	3519500000	2541400000	0.00215058	0.00293735	0.00275785	0	1.36584	1.06509	0	0	3523100	5471000	1650500000	1849700000	3454200000	0	0.00190469	0.00158387	0	∞	1.20255	0	610280	0	0	2634800000	1335600000	1781200000	0.000231623	0	0	0	0	0	0	4320300	0	0	1584900000	2579400000	2056500000	0.00272591
Protein S100-A9	S100A9		12415000	16786000	16053000	0	3763400000	3519500000	2541400000	0.00446033	0.00456116	0	0.739604	1.02261	∞	5030600	792310000	16532000	3431700	1650500000	1849700000	3454200000	0.480042	0.00893767	0.000993486	0.00634928	0.0186185	8.99627	0	272920000	86681000	104650000	2634800000	1335600000	1781200000	0.103583	0.0649004	0.0587525	0	0.626556	1.10464	8247200	45966000	120300000	230440000	1584900000	2579400000	2056500000	0.0290025
40S ribosomal protein S3	RPS3		4462600	0	2908000	136240	3763400000	3519500000	2541400000	0	0.000826254	5.36082e-05	∞	∞	15.4128	0	5360500	1506100	0	1650500000	1849700000	3454200000	0.0032478	0.00081424	0	0	0.250705	∞	0	21533000	10530000	8902300	2634800000	1335600000	1781200000	0.00817254	0.0078841	0.00499792	0	0.964706	1.57747	6424100	1107400	15528000	10371000	1584900000	2579400000	2056500000	0.000698719
40S ribosomal protein S29	RPS29		0	0	0	0	3763400000	3519500000	2541400000	0	0	0	0	0	0	0	0	0	1630700	1650500000	1849700000	3454200000	0	0	0.000472092	0	0	0	840320	439800	501970	0	2634800000	1335600000	1781200000	0.00016692	0.000375839	0	1.91069	2.25161	∞	0	338410	0	223120	1584900000	2579400000	2056500000	0.000213521
Putative 40S ribosomal protein S26-like 1;40S ribosomal protein S26	RPS26P11;RPS26		3968200	1042200	0	0	3763400000	3519500000	2541400000	0.00027693	0	0	3.80752	0	0	0	7004400	3255800	2581600	1650500000	1849700000	3454200000	0.0042438	0.00176018	0.00074738	0	0.414764	2.35513	2708500	5373500	1944400	2628500	2634800000	1335600000	1781200000	0.00203943	0.00145583	0.00147569	0.504048	0.713838	0.986538	2707400	2215100	3618700	3448400	1584900000	2579400000	2056500000	0.00139763
40S ribosomal protein S20	RPS20		0	318670	0	0	3763400000	3519500000	2541400000	8.46761e-05	0	0	0	0	0	3554100	16866000	3232200	14185000	1650500000	1849700000	3454200000	0.0102187	0.00174742	0.00410659	0.210726	0.171002	0.425515	0	24602000	13867000	5137600	2634800000	1335600000	1781200000	0.00933733	0.0103826	0.00288435	0	1.11195	3.59964	4299100	5979200	12526000	10052000	1584900000	2579400000	2056500000	0.0037726
40S ribosomal protein S16	RPS16		742660	323060	0	0	3763400000	3519500000	2541400000	8.58426e-05	0	0	2.29883	0	0	0	3629800	2758500	134760	1650500000	1849700000	3454200000	0.00219921	0.00149132	3.90134e-05	0	0.678117	38.2259	1733800	12412000	7489000	2081400	2634800000	1335600000	1781200000	0.00471079	0.00560722	0.00116854	0.139687	1.19029	4.79849	2332100	1692200	8933400	8745900	1584900000	2579400000	2056500000	0.0010677
60S acidic ribosomal protein P2	RPLP2		62806	0	0	0	3763400000	3519500000	2541400000	0	0	0	∞	0	0	0	0	447010	0	1650500000	1849700000	3454200000	0	0.000241666	0	0	∞	∞	3081200	13425000	8774400	6920000	2634800000	1335600000	1781200000	0.00509526	0.00656963	0.00388502	0.229512	1.28936	1.69102	10396000	4080300	6339500	13432000	1584900000	2579400000	2056500000	0.00257448
60S acidic ribosomal protein P0;60S acidic ribosomal protein P0-like	RPLP0;RPLP0P6		54609	0	0	27913	3763400000	3519500000	2541400000	0	0	1.09833e-05	∞	0	0	0	3509900	1590400	656940	1650500000	1849700000	3454200000	0.00212657	0.000859815	0.000190186	0	0.404321	4.52092	1350700	11269000	4094800	3114000	2634800000	1335600000	1781200000	0.00427698	0.00306589	0.00174826	0.11986	0.716834	1.75368	1459600	727960	3569200	7142300	1584900000	2579400000	2056500000	0.00045931
60S ribosomal protein L7a	RPL7A		0	0	0	0	3763400000	3519500000	2541400000	0	0	0	0	0	0	0	1949900	0	0	1650500000	1849700000	3454200000	0.0011814	0	0	0	0	0	0	1819100	0	588450	2634800000	1335600000	1781200000	0.000690413	0	0.000330367	0	0	0	0	1041400	1620100	1915200	1584900000	2579400000	2056500000	0.000657076
60S ribosomal protein L38	RPL38		7256200	193590	345130	1095300	3763400000	3519500000	2541400000	5.14402e-05	9.80622e-05	0.000430983	37.4823	1.90633	0.227532	7041800	4164700	7724600	22329000	1650500000	1849700000	3454200000	0.0025233	0.00417614	0.0064643	1.69083	1.65503	0.64603	26068000	64709000	32272000	22159000	2634800000	1335600000	1781200000	0.0245594	0.0241629	0.0124405	0.40285	0.983858	1.94228	22547000	53475000	58080000	59442000	1584900000	2579400000	2056500000	0.0337403
60S ribosomal protein L3	RPL3		0	1014300	979270	1391200	3763400000	3519500000	2541400000	0.000269517	0.000278241	0.000547415	0	1.03237	0.508282	0	0	1868200	750780	1650500000	1849700000	3454200000	0	0.00101	0.000217353	0	∞	4.64683	2499900	4659700	2853400	0	2634800000	1335600000	1781200000	0.00176852	0.00213642	0	0.536494	1.20803	∞	1432100	1636900	2870600	3220300	1584900000	2579400000	2056500000	0.00103281
60S ribosomal protein L27	RPL27		768380	0	0	0	3763400000	3519500000	2541400000	0	0	0	∞	0	0	0	0	0	0	1650500000	1849700000	3454200000	0	0	0	0	0	0	0	2289600	0	935540	2634800000	1335600000	1781200000	0.000868984	0	0.00052523	0	0	0	1455300	999800	1792000	2438400	1584900000	2579400000	2056500000	0.000630828
60S ribosomal protein L18	RPL18		0	0	0	0	3763400000	3519500000	2541400000	0	0	0	0	0	0	2558300	1181500	0	0	1650500000	1849700000	3454200000	0.000715844	0	0	2.1653	0	0	0	3747900	1883700	0	2634800000	1335600000	1781200000	0.00142246	0.00141038	0	0	0.991505	∞	5991400	2068600	3964400	3428200	1584900000	2579400000	2056500000	0.00130519
60S ribosomal protein L11	RPL11		0	0	0	1875900	3763400000	3519500000	2541400000	0	0	0.000738136	0	0	0	0	10049000	3177400	4204900	1650500000	1849700000	3454200000	0.00608846	0.00171779	0.00121733	0	0.282139	1.41111	0	5264200	4451100	2866100	2634800000	1335600000	1781200000	0.00199795	0.00333266	0.00160908	0	1.66804	2.07115	2327100	2250200	4765200	4868700	1584900000	2579400000	2056500000	0.00141977
Histone-binding protein RBBP7	RBBP7		0	3509900	6499900	12494000	3763400000	3519500000	2541400000	0.000932641	0.00184682	0.00491619	0	1.98021	0.375662	0	6957600	1856300	4740500	1650500000	1849700000	3454200000	0.00421545	0.00100357	0.00137239	0	0.238069	0.731257	0	14340000	11609000	13499000	2634800000	1335600000	1781200000	0.00544254	0.00869197	0.0075786	0	1.59704	1.14691	0	2556100	42918000	16202000	1584900000	2579400000	2056500000	0.00161278
Histone-binding protein RBBP4	RBBP4		0	2517600	11419000	2766300	3763400000	3519500000	2541400000	0.00066897	0.00324449	0.00108849	0	4.84999	2.98072	0	6379700	402360	11016000	1650500000	1849700000	3454200000	0.00386531	0.000217527	0.00318916	0	0.0562767	0.0682083	0	4420600	1908600	11731000	2634800000	1335600000	1781200000	0.00167777	0.00142902	0.00658601	0	0.851736	0.216978	0	11050000	28477000	18514000	1584900000	2579400000	2056500000	0.00697205
26S proteasome non-ATPase regulatory subunit 2	PSMD2		0	0	0	0	3763400000	3519500000	2541400000	0	0	0	0	0	0	0	0	0	0	1650500000	1849700000	3454200000	0	0	0	0	0	0	0	0	0	0	2634800000	1335600000	1781200000	0	0	0	0	0	0	5894500	3584800	3236300	1652600	1584900000	2579400000	2056500000	0.00226185
Protein phosphatase 1B	PPM1B		3206100	9903800	3486800	1293900	3763400000	3519500000	2541400000	0.00263161	0.000990709	0.000509129	0.323724	0.376465	1.94589	0	7505600	50418	0	1650500000	1849700000	3454200000	0.00454747	2.72574e-05	0	0	0.00599397	∞	20825000	17064000	13996000	10731000	2634800000	1335600000	1781200000	0.00647639	0.0104792	0.00602459	1.22041	1.61806	1.7394	24211000	34354000	35606000	31557000	1584900000	2579400000	2056500000	0.0216758
Prolactin-inducible protein	PIP		187930	0	218150	0	3763400000	3519500000	2541400000	0	6.19832e-05	0	∞	∞	∞	916640	165800	1027900	0	1650500000	1849700000	3454200000	0.000100454	0.000555712	0	5.52859	5.53198	∞	0	0	0	0	2634800000	1335600000	1781200000	0	0	0	0	0	0	346450	817680	746620	1010600	1584900000	2579400000	2056500000	0.000515919
Protein DJ-1	PARK7		867590	0	0	0	3763400000	3519500000	2541400000	0	0	0	∞	0	0	0	0	0	0	1650500000	1849700000	3454200000	0	0	0	0	0	0	0	2649800	1231500	1029600	2634800000	1335600000	1781200000	0.00100569	0.000922058	0.000578037	0	0.916838	1.59515	2959400	509420	0	1101300	1584900000	2579400000	2056500000	0.000321421
Olfactory receptor 3A2;Olfactory receptor 3A3	OR3A2;OR3A3		0	0	0	0	3763400000	3519500000	2541400000	0	0	0	0	0	0	0	0	0	0	1650500000	1849700000	3454200000	0	0	0	0	0	0	10817000	40244000	16703000	14258000	2634800000	1335600000	1781200000	0.015274	0.012506	0.00800472	0.268785	0.818775	1.56233	41603000	21886000	18259000	5468400	1584900000	2579400000	2056500000	0.0138091
Unconventional myosin-Ib	MYO1B		0	78774	4040700	132760	3763400000	3519500000	2541400000	2.09316e-05	0.00114809	5.22389e-05	0	54.8496	21.9777	601440	6730900	9422300	11255000	1650500000	1849700000	3454200000	0.0040781	0.00509396	0.00325835	0.0893551	1.2491	1.56336	0	56703000	1606100	50369000	2634800000	1335600000	1781200000	0.0215208	0.00120253	0.0282781	0	0.0558776	0.0425251	64577000	57550000	51925000	10817000	1584900000	2579400000	2056500000	0.0363114
Myosin regulatory light chain 12A;Myosin regulatory light polypeptide 9	MYL12A;MYL9		204840	0	1078900	545210	3763400000	3519500000	2541400000	0	0.000306549	0.000214531	∞	∞	1.42893	1096200	70075000	2520500	7558800	1650500000	1849700000	3454200000	0.0424568	0.00136265	0.00218829	0.0156432	0.032095	0.622702	105650000	231860000	161580000	183110000	2634800000	1335600000	1781200000	0.0879991	0.120979	0.102801	0.455663	1.37478	1.17682	191190000	174140000	311090000	1182700000	1584900000	2579400000	2056500000	0.109874
Myosin-9	MYH9		8200200	5176700	34133000	4231000	3763400000	3519500000	2541400000	0.00137554	0.00969825	0.00166483	1.58406	7.05052	5.82537	2000100	368210000	9699100	1936800	1650500000	1849700000	3454200000	0.22309	0.00524361	0.000560709	0.00543195	0.0235044	9.35175	0	3752300	1527200	3405200	2634800000	1335600000	1781200000	0.00142413	0.00114346	0.00191174	0	0.802915	0.598122	338670000	30034000	41506000	153950000	1584900000	2579400000	2056500000	0.0189501
C-Myc-binding protein	MYCBP		11286000	0	9580200	7116700	3763400000	3519500000	2541400000	0	0.00272203	0.00280031	∞	∞	0.972049	15646000	3371000	16821000	8213500	1650500000	1849700000	3454200000	0.00204241	0.00909391	0.00237783	4.64135	4.45253	3.82446	0	10243000	0	2232700	2634800000	1335600000	1781200000	0.00388758	0	0.00125348	0	0	0	5751100	14869000	20702000	22799000	1584900000	2579400000	2056500000	0.00938166
Putative uncharacterized protein encoded by LINC00336	LINC00336		0	0	0	0	3763400000	3519500000	2541400000	0	0	0	0	0	0	0	0	0	0	1650500000	1849700000	3454200000	0	0	0	0	0	0	15141000	8607100	8172700	0	2634800000	1335600000	1781200000	0.0032667	0.00611912	0	1.75913	1.87318	∞	2578900	7316900	2424300	5206100	1584900000	2579400000	2056500000	0.00461663
Importin-8	IPO8		0	0	0	0	3763400000	3519500000	2541400000	0	0	0	0	0	0	0	0	0	0	1650500000	1849700000	3454200000	0	0	0	0	0	0	0	0	0	0	2634800000	1335600000	1781200000	0	0	0	0	0	0	1705900	0	0	0	1584900000	2579400000	2056500000	0
Ig gamma-2 chain C region	IGHG2		114580000	83603000	126250000	337140000	3763400000	3519500000	2541400000	0.0222148	0.0358716	0.132659	1.37052	1.61476	0.270404	136850000	144620000	85015000	206240000	1650500000	1849700000	3454200000	0.0876219	0.0459615	0.059707	0.946273	0.524543	0.769784	278650000	324770000	0	205880000	2634800000	1335600000	1781200000	0.123262	0	0.115585	0.857992	0	0	201560000	236940000	312780000	348060000	1584900000	2579400000	2056500000	0.149498
Heat shock protein beta-1	HSPB1		0	0	75431	0	3763400000	3519500000	2541400000	0	2.14323e-05	0	0	∞	∞	1199200	3806400	4173400	141470	1650500000	1849700000	3454200000	0.00230621	0.00225626	4.09559e-05	0.315048	0.97834	55.0899	1736300	19497000	7113100	6675200	2634800000	1335600000	1781200000	0.0073998	0.00532577	0.00374759	0.0890547	0.719718	1.42112	6871800	1723100	14544000	11293000	1584900000	2579400000	2056500000	0.0010872
Heat shock 70 kDa protein 6;Putative heat shock 70 kDa protein 7	HSPA6;HSPA7		30734000	21789000	56873000	65314000	3763400000	3519500000	2541400000	0.00578971	0.0161594	0.0257	1.41053	2.79105	0.62877	0	25928000	28762000	65607000	1650500000	1849700000	3454200000	0.0157092	0.0155495	0.0189934	0	0.989838	0.818682	26603000	146130000	179240000	57380000	2634800000	1335600000	1781200000	0.0554615	0.134202	0.0322142	0.18205	2.41973	4.16592	40497000	102830000	373430000	316170000	1584900000	2579400000	2056500000	0.0648811
78 kDa glucose-regulated protein	HSPA5		2543200	130080	7811800	2719300	3763400000	3519500000	2541400000	3.45645e-05	0.00221958	0.00107	19.551	64.2155	2.07437	8789300	34801000	9154400	13051000	1650500000	1849700000	3454200000	0.0210851	0.00494913	0.0037783	0.252559	0.234721	1.30988	4614600	38211000	20115000	22038000	2634800000	1335600000	1781200000	0.0145024	0.0150606	0.0123726	0.120766	1.03849	1.21726	28944000	13882000	34426000	37690000	1584900000	2579400000	2056500000	0.00875891
Heterogeneous nuclear ribonucleoprotein M	HNRNPM		0	0	1635100	0	3763400000	3519500000	2541400000	0	0.000464583	0	0	∞	∞	0	1537200	0	0	1650500000	1849700000	3454200000	0.000931354	0	0	0	0	0	0	0	0	1748700	2634800000	1335600000	1781200000	0	0	0.000981754	0	0	0	0	0	7915100	16820000	1584900000	2579400000	2056500000	0
Histone H3.2;Histone H3.1t;Histone H3.3;Histone H3.1;Histone H3.3C	HIST2H3A;HIST3H3;H3F3A;HIST1H3A;H3F3C		285040	2154800	2255700	4432000	3763400000	3519500000	2541400000	0.000572567	0.000640915	0.00174392	0.132281	1.11937	0.367514	22053000	32245000	6867300	14022000	1650500000	1849700000	3454200000	0.0195365	0.00371266	0.00405941	0.68392	0.190037	0.914581	0	0	0	0	2634800000	1335600000	1781200000	0	0	0	0	0	0	0	1476300	5991300	9788800	1584900000	2579400000	2056500000	0.000931478
Histone H4	HIST1H4A		0	0	6607000	3599000	3763400000	3519500000	2541400000	0	0.00187726	0.00141615	0	∞	1.32561	155600000	42767000	17530000	19492000	1650500000	1849700000	3454200000	0.0259115	0.00947721	0.00564299	3.63832	0.365753	1.67947	0	35956000	14382000	16555000	2634800000	1335600000	1781200000	0.0136466	0.0107682	0.0092943	0	0.789077	1.15858	1346300	3672900	71298000	109590000	1584900000	2579400000	2056500000	0.00231743
Glutathione S-transferase P	GSTP1		3524400	0	0	0	3763400000	3519500000	2541400000	0	0	0	∞	0	0	1805000	3110200	4452800	175600	1650500000	1849700000	3454200000	0.0018844	0.00240731	5.08367e-05	0.580349	1.27749	47.3538	52355000	138070000	58061000	50553000	2634800000	1335600000	1781200000	0.0524025	0.0434718	0.0283814	0.379192	0.829576	1.5317	57184000	19751000	41662000	46034000	1584900000	2579400000	2056500000	0.012462
ELM2 and SANT domain-containing protein 1	ELMSAN1		0	0	0	3230200	3763400000	3519500000	2541400000	0	0	0.00127103	0	0	0	0	0	4786600	2830800	1650500000	1849700000	3454200000	0	0.00258777	0.000819524	0	∞	3.15765	0	2547000	0	0	2634800000	1335600000	1781200000	0.000966677	0	0	0	0	0	0	1450600	1516000	1602000	1584900000	2579400000	2056500000	0.000915263
Putative elongation factor 1-alpha-like 3;Elongation factor 1-alpha 1;Elongation factor 1-alpha 2	EEF1A1P5;EEF1A1;EEF1A2		131530000	64517000	78688000	37155000	3763400000	3519500000	2541400000	0.0171433	0.0223577	0.0146199	2.03869	1.30417	1.52927	94303000	106990000	87279000	94237000	1650500000	1849700000	3454200000	0.0648228	0.0471855	0.0272819	0.881419	0.727915	1.72956	154700000	310470000	247160000	898650000	2634800000	1335600000	1781200000	0.117834	0.185055	0.504519	0.498277	1.57047	0.366795	291610000	178400000	238090000	281800000	1584900000	2579400000	2056500000	0.112562
NADH-cytochrome b5 reductase 3;NADH-cytochrome b5 reductase 3 membrane-bound form;NADH-cytochrome b5 reductase 3 soluble form	CYB5R3		0	0	0	0	3763400000	3519500000	2541400000	0	0	0	0	0	0	0	372060	0	0	1650500000	1849700000	3454200000	0.000225423	0	0	0	0	0	0	7189100	3711800	3230000	2634800000	1335600000	1781200000	0.00272852	0.00277913	0.00181338	0	1.01855	1.53256	2657300	1219500	0	0	1584900000	2579400000	2056500000	0.000769449
Cold-inducible RNA-binding protein	CIRBP		0	0	0	0	3763400000	3519500000	2541400000	0	0	0	0	0	0	0	0	0	0	1650500000	1849700000	3454200000	0	0	0	0	0	0	0	0	0	0	2634800000	1335600000	1781200000	0	0	0	0	0	0	0	703320	954160	568770	1584900000	2579400000	2056500000	0.000443763
T-complex protein 1 subunit theta	CCT8		279540	122850000	224200000	148710000	3763400000	3519500000	2541400000	0.0326434	0.0637022	0.058515	#NAME?	#NAME?	#NAME?	0	54357000	182700000	301380000	1650500000	1849700000	3454200000	0.0329337	0.0987728	0.0872503	#NAME?	#NAME?	#NAME?	0	115660000	91559000	112770000	2634800000	1335600000	1781200000	0.0438971	0.0685527	0.0633113	#NAME?	#NAME?	#NAME?	10765000	73082000	322690000	335260000	1584900000	2579400000	2056500000	0.0461114
T-complex protein 1 subunit eta	CCT7		321560	63446000	98483000	72414000	3763400000	3519500000	2541400000	0.0168587	0.0279821	0.0284937	0.00506825	1.6598	0.982044	0	26359000	175730000	134090000	1650500000	1849700000	3454200000	0.0159703	0.0950046	0.0388194	0	5.94883	2.44735	1048000	96053000	125810000	141850000	2634800000	1335600000	1781200000	0.0364555	0.0941974	0.0796373	0.0109106	2.5839	1.18283	11950000	63688000	201250000	183860000	1584900000	2579400000	2056500000	0.0401842
T-complex protein 1 subunit zeta	CCT6A		0	62310000	84766000	68542000	3763400000	3519500000	2541400000	0.0165568	0.0240847	0.0269702	0	1.45467	0.893011	0	64693000	183080000	268920000	1650500000	1849700000	3454200000	0.039196	0.0989782	0.077853	0	2.52521	1.27135	0	79911000	79638000	114910000	2634800000	1335600000	1781200000	0.0303291	0.0596271	0.0645127	0	1.96601	0.92427	988580	54815000	237440000	234210000	1584900000	2579400000	2056500000	0.0345858
T-complex protein 1 subunit delta	CCT4		0	26204000	97202000	63762000	3763400000	3519500000	2541400000	0.00696285	0.0276181	0.0250893	0	3.9665	1.10079	0	45407000	126760000	235140000	1650500000	1849700000	3454200000	0.0275111	0.06853	0.0680736	0	2.491	1.0067	4421800	55249000	76465000	116380000	2634800000	1335600000	1781200000	0.020969	0.0572514	0.065338	0.080034	2.73029	0.876235	3975000	55890000	230160000	198150000	1584900000	2579400000	2056500000	0.0352641
Carbonyl reductase [NADPH] 1	CBR1		872160	2336700	845900	43819	3763400000	3519500000	2541400000	0.000620901	0.000240347	1.72421e-05	0.373244	0.387093	13.9395	6135400	5686200	3392500	3468000	1650500000	1849700000	3454200000	0.00344514	0.00183408	0.001004	1.079	0.532368	1.82678	27979000	33781000	47594000	26612000	2634800000	1335600000	1781200000	0.0128211	0.0356349	0.0149405	0.828247	2.7794	2.38512	28283000	28335000	30281000	26286000	1584900000	2579400000	2056500000	0.0178781
Calmodulin-regulated spectrin-associated protein 3	CAMSAP3		0	0	52161	0	3763400000	3519500000	2541400000	0	1.48206e-05	0	0	∞	∞	0	0	0	0	1650500000	1849700000	3454200000	0	0	0	0	0	0	0	4671600	3354900	3898200	2634800000	1335600000	1781200000	0.00177304	0.0025119	0.00218852	0	1.41672	1.14776	2679700	2380700	2939700	2221300	1584900000	2579400000	2056500000	0.00150211
Calmodulin	CALM1		0	0	0	0	3763400000	3519500000	2541400000	0	0	0	0	0	0	0	692650	555970	2904400	1650500000	1849700000	3454200000	0.000419661	0.000300573	0.000840831	0	0.716229	0.357471	0	20689000	14659000	13337000	2634800000	1335600000	1781200000	0.00785221	0.0109756	0.00748765	0	1.39777	1.46583	9361000	9503000	16579000	34719000	1584900000	2579400000	2056500000	0.00599596
Uncharacterized protein C11orf84	C11orf84		0	1269000	0	0	3763400000	3519500000	2541400000	0.000337195	0	0	0	0	0	0	0	0	866980	1650500000	1849700000	3454200000	0	0	0.000250993	0	0	0	0	241520	0	0	2634800000	1335600000	1781200000	9.16654e-05	0	0	0	0	0	0	513990	599970	545540	1584900000	2579400000	2056500000	0.000324304
ATP synthase subunit O, mitochondrial	ATP5O		0	0	88647	0	3763400000	3519500000	2541400000	0	2.51874e-05	0	0	∞	∞	0	2684600	1244600	0	1650500000	1849700000	3454200000	0.00162654	0.000672866	0	0	0.41368	∞	0	6380600	2340400	1802000	2634800000	1335600000	1781200000	0.00242166	0.00175232	0.00101168	0	0.723602	1.73209	1310800	0	2167200	2680200	1584900000	2579400000	2056500000	0
ATP synthase subunit alpha, mitochondrial	ATP5A1		3362400	0	2233900	4154500	3763400000	3519500000	2541400000	0	0.000634721	0.00163473	∞	∞	0.388273	7715100	22212000	23195000	26400000	1650500000	1849700000	3454200000	0.0134577	0.0125399	0.00764287	0.347339	0.931796	1.64073	29548000	65435000	58603000	27218000	2634800000	1335600000	1781200000	0.0248349	0.0438777	0.0152807	0.451563	1.76677	2.87144	59320000	19387000	61348000	38366000	1584900000	2579400000	2056500000	0.0122323
Actin, cytoplasmic 2;Actin, cytoplasmic 2, N-terminally processed;Actin, cytoplasmic 1;Actin, cytoplasmic 1, N-terminally processed	ACTG1;ACTB		266680000	118740000	199830000	70579000	3763400000	3519500000	2541400000	0.0315513	0.056778	0.0277717	2.24592	1.79955	2.04445	219530000	1420000000	306140000	388540000	1650500000	1849700000	3454200000	0.860345	0.165508	0.112483	0.154599	0.192374	1.4714	844960000	3732400000	1397900000	1209200000	2634800000	1335600000	1781200000	1.41658	1.04665	0.678868	0.226385	0.738855	1.54175	2153800000	1153700000	1742900000	3832900000	1584900000	2579400000	2056500000	0.727932
Ig kappa chain V-I region Lay;Ig kappa chain V-III region POM;Ig kappa chain V-III region VH;Ig kappa chain V-III region CLL			10553000	283650	2100800	221200	3763400000	3519500000	2541400000	7.53707e-05	0.000596903	8.70386e-05	37.2043	7.91957	6.85791	2759700	22676000	10965000	12559000	1650500000	1849700000	3454200000	0.0137389	0.00592799	0.00363586	0.121701	0.431476	1.63042	9009600	8579900	6014800	3845700	2634800000	1335600000	1781200000	0.00325638	0.00450344	0.00215905	1.05008	1.38296	2.08585	5840800	6721800	9280100	8782400	1584900000	2579400000	2056500000	0.00424115
Ig kappa chain V-II region TEW;Ig kappa chain V-II region Cum;Ig kappa chain V-II region GM607;Ig kappa chain V-II region RPMI 6410			6902200000	3773500000	19001000000	11680000000	3763400000	3519500000	2541400000	1.00268	5.39878	4.59589	1.82912	5.38433	1.1747	24211000000	8442500000	5717200000	16380000000	1650500000	1849700000	3454200000	5.11512	3.09088	4.74205	2.86775	0.604264	0.651802	41718000000	52123000000	49601000000	43788000000	2634800000	1335600000	1781200000	19.7825	37.1376	24.5834	0.800376	1.87729	1.51068	37726000000	44752000000	44217000000	51125000000	1584900000	2579400000	2056500000	28.2365
Zyxin	ZYX		0	0	0	0	3763400000	3519500000	2541400000	0	0	0	0	0	0	0	0	0	0	1650500000	1849700000	3454200000	0	0	0	0	0	0	0	0	0	0	2634800000	1335600000	1781200000	0	0	0	0	0	0	0	0	0	0	1584900000	2579400000	2056500000	0
14-3-3 protein zeta/delta	YWHAZ		21015000	2548100	4988200	2060800	3763400000	3519500000	2541400000	0.000677074	0.0014173	0.000810892	8.24732	2.09328	1.74783	0	79494000	20912000	12311000	1650500000	1849700000	3454200000	0.0481636	0.0113056	0.00356407	0	0.234734	3.17211	5020000	62953000	96107000	0	2634800000	1335600000	1781200000	0.0238929	0.0719579	0	0.079742	3.01169	∞	19976000	728780	25430000	21692000	1584900000	2579400000	2056500000	0.000459827
14-3-3 protein theta	YWHAQ		0	0	0	0	3763400000	3519500000	2541400000	0	0	0	0	0	0	0	2694200	0	0	1650500000	1849700000	3454200000	0.00163235	0	0	0	0	0	0	1871500	0	0	2634800000	1335600000	1781200000	0.000710301	0	0	0	0	0	0	0	0	0	1584900000	2579400000	2056500000	0
14-3-3 protein gamma;14-3-3 protein gamma, N-terminally processed	YWHAG		3311300	0	0	0	3763400000	3519500000	2541400000	0	0	0	∞	0	0	0	0	0	0	1650500000	1849700000	3454200000	0	0	0	0	0	0	0	0	1091000	0	2634800000	1335600000	1781200000	0	0.000816861	0	0	∞	∞	666830	0	0	0	1584900000	2579400000	2056500000	0
14-3-3 protein epsilon	YWHAE		0	0	0	18451	3763400000	3519500000	2541400000	0	0	7.26017e-06	0	0	0	0	0	0	0	1650500000	1849700000	3454200000	0	0	0	0	0	0	0	2297000	0	0	2634800000	1335600000	1781200000	0.000871793	0	0	0	0	0	3914400	0	0	0	1584900000	2579400000	2056500000	0
Y-box-binding protein 3	YBX3		0	0	0	0	3763400000	3519500000	2541400000	0	0	0	0	0	0	0	0	0	0	1650500000	1849700000	3454200000	0	0	0	0	0	0	0	0	0	0	2634800000	1335600000	1781200000	0	0	0	0	0	0	0	0	1397300	0	1584900000	2579400000	2056500000	0
Nuclease-sensitive element-binding protein 1	YBX1		0	0	0	0	3763400000	3519500000	2541400000	0	0	0	0	0	0	0	0	0	0	1650500000	1849700000	3454200000	0	0	0	0	0	0	1573100	7351600	5289300	522140	2634800000	1335600000	1781200000	0.00279019	0.00396024	0.000293139	0.213981	1.41934	13.5098	7088700	1166500	6707000	6822800	1584900000	2579400000	2056500000	0.000736009
Partner of Y14 and mago	WIBG		0	0	0	0	3763400000	3519500000	2541400000	0	0	0	0	0	0	0	0	0	0	1650500000	1849700000	3454200000	0	0	0	0	0	0	0	0	0	0	2634800000	1335600000	1781200000	0	0	0	0	0	0	137870	0	0	74626	1584900000	2579400000	2056500000	0
Voltage-dependent anion-selective channel protein 2	VDAC2		0	0	0	0	3763400000	3519500000	2541400000	0	0	0	0	0	0	0	349290	0	0	1650500000	1849700000	3454200000	0.000211627	0	0	0	0	0	0	2529500	1266900	0	2634800000	1335600000	1781200000	0.000960035	0.000948562	0	0	0.98805	∞	0	0	983750	967220	1584900000	2579400000	2056500000	0
Voltage-dependent anion-selective channel protein 1	VDAC1		0	0	69776	1141700	3763400000	3519500000	2541400000	0	1.98255e-05	0.000449241	0	∞	0.0441312	0	7169300	2645300	5533000	1650500000	1849700000	3454200000	0.00434371	0.00143012	0.00160182	0	0.32924	0.892813	5176000	48622000	8473900	1587500	2634800000	1335600000	1781200000	0.0184538	0.00634464	0.000891253	0.106454	0.343813	7.11879	2171200	1541000	21401000	14502000	1584900000	2579400000	2056500000	0.000972301
Synaptic vesicle membrane protein VAT-1 homolog	VAT1		0	0	0	0	3763400000	3519500000	2541400000	0	0	0	0	0	0	0	0	0	0	1650500000	1849700000	3454200000	0	0	0	0	0	0	0	196940	0	0	2634800000	1335600000	1781200000	7.47457e-05	0	0	0	0	0	341240	0	0	0	1584900000	2579400000	2056500000	0
Ubiquitin-associated protein 2-like	UBAP2L		0	0	0	0	3763400000	3519500000	2541400000	0	0	0	0	0	0	0	0	0	0	1650500000	1849700000	3454200000	0	0	0	0	0	0	0	0	0	0	2634800000	1335600000	1781200000	0	0	0	0	0	0	0	0	0	0	1584900000	2579400000	2056500000	0
Thioredoxin	TXN		0	0	0	0	3763400000	3519500000	2541400000	0	0	0	0	0	0	0	12237000	1501600	0	1650500000	1849700000	3454200000	0.00741412	0.000811807	0	0	0.109495	∞	0	7066100	0	9414200	2634800000	1335600000	1781200000	0.00268184	0	0.00528531	0	0	0	4211100	2570600	0	15002000	1584900000	2579400000	2056500000	0.00162193
Tubulin alpha-4A chain	TUBA4A		0	0	833890	118890	3763400000	3519500000	2541400000	0	0.000236934	4.67813e-05	0	∞	5.06472	0	8203100	0	0	1650500000	1849700000	3454200000	0.00497007	0	0	0	0	0	3892100	3791500	4171900	3404500	2634800000	1335600000	1781200000	0.00143901	0.00312361	0.00191135	1.02653	2.17067	1.63424	4114500	2183700	4143400	5113700	1584900000	2579400000	2056500000	0.00137782
Tubulin alpha-1C chain;Tubulin alpha-8 chain	TUBA1C;TUBA8		0	0	0	0	3763400000	3519500000	2541400000	0	0	0	0	0	0	0	79457	843080	0	1650500000	1849700000	3454200000	4.81412e-05	0.000455793	0	0	9.46784	∞	0	3715100	0	4800600	2634800000	1335600000	1781200000	0.00141001	0	0.00269515	0	0	0	3220800	0	7928700	4875700	1584900000	2579400000	2056500000	0
Tubulin alpha-1B chain	TUBA1B		24664000	16060000	83226000	19080000	3763400000	3519500000	2541400000	0.00426742	0.0236471	0.00750767	1.53574	5.54132	3.14973	81417000	186380000	265310000	267010000	1650500000	1849700000	3454200000	0.112923	0.143434	0.0773001	0.436833	1.27019	1.85555	385910000	353490000	341870000	355250000	2634800000	1335600000	1781200000	0.134162	0.255967	0.199444	1.09171	1.9079	1.2834	457780000	293230000	632820000	513690000	1584900000	2579400000	2056500000	0.185015
Tetratricopeptide repeat protein 39B	TTC39B		0	0	0	0	3763400000	3519500000	2541400000	0	0	0	0	0	0	0	0	0	0	1650500000	1849700000	3454200000	0	0	0	0	0	0	0	1843500	0	0	2634800000	1335600000	1781200000	0.000699674	0	0	0	0	0	0	0	1879800	0	1584900000	2579400000	2056500000	0
Tropomyosin alpha-4 chain	TPM4		0	0	0	0	3763400000	3519500000	2541400000	0	0	0	0	0	0	0	0	0	725270	1650500000	1849700000	3454200000	0	0	0.000209968	0	0	0	2260600	3275100	1292700	0	2634800000	1335600000	1781200000	0.00124302	0.00096788	0	0.690238	0.778654	∞	0	785320	1534000	3574300	1584900000	2579400000	2056500000	0.000495501
Triosephosphate isomerase	TPI1		10636000	0	0	0	3763400000	3519500000	2541400000	0	0	0	∞	0	0	3855100	8823000	1664300	622470	1650500000	1849700000	3454200000	0.00534565	0.000899768	0.000180207	0.436938	0.168318	4.99297	476880	26055000	17600000	5528300	2634800000	1335600000	1781200000	0.0098888	0.0131776	0.00310369	0.0183028	1.33258	4.24578	16619000	1253700	8227100	4613800	1584900000	2579400000	2056500000	0.000791028
Mitochondrial import receptor subunit TOM22 homolog	TOMM22		0	0	1711200	0	3763400000	3519500000	2541400000	0	0.000486205	0	0	∞	∞	0	0	1322600	1142000	1650500000	1849700000	3454200000	0	0.000715035	0.000330612	0	∞	2.16276	0	0	0	87587	2634800000	1335600000	1781200000	0	0	4.9173e-05	0	0	0	0	96490	461360	220710	1584900000	2579400000	2056500000	6.08808e-05
Tropomodulin-3	TMOD3		0	0	0	0	3763400000	3519500000	2541400000	0	0	0	0	0	0	0	590370	0	0	1650500000	1849700000	3454200000	0.000357692	0	0	0	0	0	0	0	0	0	2634800000	1335600000	1781200000	0	0	0	0	0	0	1439100	1730200	0	6886100	1584900000	2579400000	2056500000	0.00109168
Transketolase	TKT		3549400	0	0	0	3763400000	3519500000	2541400000	0	0	0	∞	0	0	0	0	0	0	1650500000	1849700000	3454200000	0	0	0	0	0	0	3197800	27027000	10070000	2563600	2634800000	1335600000	1781200000	0.0102577	0.00753968	0.00143925	0.118319	0.735026	5.2386	33376000	792490	8180200	4542600	1584900000	2579400000	2056500000	0.000500025
Mitochondrial import inner membrane translocase subunit TIM50	TIMM50		0	0	0	0	3763400000	3519500000	2541400000	0	0	0	0	0	0	0	0	0	2096800	1650500000	1849700000	3454200000	0	0	0.000607029	0	0	0	709450	0	648160	0	2634800000	1335600000	1781200000	0	0.000485295	0	∞	∞	∞	485190	377670	664940	483920	1584900000	2579400000	2056500000	0.000238293
Protein-glutamine gamma-glutamyltransferase E;Protein-glutamine gamma-glutamyltransferase E 50 kDa catalytic chain;Protein-glutamine gamma-glutamyltransferase E 27 kDa non-catalytic chain	TGM3		0	0	65401	0	3763400000	3519500000	2541400000	0	1.85825e-05	0	0	∞	∞	0	0	0	0	1650500000	1849700000	3454200000	0	0	0	0	0	0	0	1992700	0	0	2634800000	1335600000	1781200000	0.0007563	0	0	0	0	0	0	0	0	0	1584900000	2579400000	2056500000	0
Transgelin-2	TAGLN2		0	0	0	0	3763400000	3519500000	2541400000	0	0	0	0	0	0	0	904860	0	2419800	1650500000	1849700000	3454200000	0.000548234	0	0.000700538	0	0	0	5895600	42453000	4905800	6560400	2634800000	1335600000	1781200000	0.0161124	0.00367311	0.00368313	0.138874	0.227967	0.997277	29140000	3609600	16351000	15983000	1584900000	2579400000	2056500000	0.00227749
TGF-beta-activated kinase 1 and MAP3K7-binding protein 1	TAB1		39102	0	0	0	3763400000	3519500000	2541400000	0	0	0	∞	0	0	0	0	121250	0	1650500000	1849700000	3454200000	0	6.55512e-05	0	0	∞	∞	0	0	0	0	2634800000	1335600000	1781200000	0	0	0	0	0	0	0	0	0	0	1584900000	2579400000	2056500000	0
Sin3 histone deacetylase corepressor complex component SDS3	SUDS3		0	0	2685800	1500300	3763400000	3519500000	2541400000	0	0.00076312	0.000590344	0	∞	1.29267	0	0	4763600	1946500	1650500000	1849700000	3454200000	0	0.00257534	0.000563517	0	∞	4.57011	0	0	0	1151900	2634800000	1335600000	1781200000	0	0	0.000646699	0	0	0	0	1510000	5998100	5662700	1584900000	2579400000	2056500000	0.000952741
Serine/threonine-protein kinase 38-like	STK38L		4816000	2260600	95880	1551200	3763400000	3519500000	2541400000	0.00060068	2.72425e-05	0.000610372	2.13041	0.0453528	0.0446326	9470100	6422000	8249400	12203000	1650500000	1849700000	3454200000	0.00389094	0.00445986	0.0035328	1.47463	1.14622	1.26241	45265000	61622000	53064000	24543000	2634800000	1335600000	1781200000	0.0233877	0.0397305	0.0137789	0.734559	1.69877	2.88342	38289000	42534000	34000000	42362000	1584900000	2579400000	2056500000	0.026837
Stress-induced-phosphoprotein 1	STIP1		0	0	0	0	3763400000	3519500000	2541400000	0	0	0	0	0	0	0	0	0	1220300	1650500000	1849700000	3454200000	0	0	0.00035328	0	0	0	0	1077700	0	0	2634800000	1335600000	1781200000	0.000409025	0	0	0	0	0	829560	0	185140	102050	1584900000	2579400000	2056500000	0
Superoxide dismutase [Mn], mitochondrial	SOD2		0	0	88950	0	3763400000	3519500000	2541400000	0	2.52735e-05	0	0	∞	∞	0	1064700	1525800	0	1650500000	1849700000	3454200000	0.000645077	0.000824891	0	0	1.27875	∞	0	49504000	31900000	9622100	2634800000	1335600000	1781200000	0.0187885	0.0238844	0.00540203	0	1.27122	4.42137	5322200	0	21502000	19554000	1584900000	2579400000	2056500000	0
Small nuclear ribonucleoprotein F	SNRPF		0	0	0	0	3763400000	3519500000	2541400000	0	0	0	0	0	0	0	0	0	0	1650500000	1849700000	3454200000	0	0	0	0	0	0	0	0	490840	0	2634800000	1335600000	1781200000	0	0.000367505	0	0	∞	∞	278400	160680	398240	460160	1584900000	2579400000	2056500000	0.000101382
Large neutral amino acids transporter small subunit 1	SLC7A5		0	0	0	1870500	3763400000	3519500000	2541400000	0	0	0.000736012	0	0	0	0	0	0	3095500	1650500000	1849700000	3454200000	0	0	0.000896155	0	0	0	3022900	2322800	1613800	0	2634800000	1335600000	1781200000	0.000881585	0.0012083	0	1.3014	1.37059	∞	3843200	1621000	2312600	1194700	1584900000	2579400000	2056500000	0.00102278
ADP/ATP translocase 3;ADP/ATP translocase 3, N-terminally processed	SLC25A6		3768300	0	0	439820	3763400000	3519500000	2541400000	0	0	0.000173062	∞	0	0	37563	0	8706400	351080	1650500000	1849700000	3454200000	0	0.00470693	0.000101639	∞	∞	46.3104	4093800	11199000	13712000	13187000	2634800000	1335600000	1781200000	0.00425042	0.0102665	0.00740344	0.36555	2.41542	1.38673	5084000	2980200	22264000	19420000	1584900000	2579400000	2056500000	0.00188037
Calcium-binding mitochondrial carrier protein Aralar2;Calcium-binding mitochondrial carrier protein Aralar1	SLC25A13;SLC25A12		0	0	0	276100	3763400000	3519500000	2541400000	0	0	0.000108641	0	0	0	0	0	2470900	2458600	1650500000	1849700000	3454200000	0	0.00133584	0.000711771	0	∞	1.87678	0	0	1660900	0	2634800000	1335600000	1781200000	0	0.00124356	0	0	∞	∞	0	0	4123400	3163000	1584900000	2579400000	2056500000	0
Tricarboxylate transport protein, mitochondrial	SLC25A1		0	26269	11780000	11806000	3763400000	3519500000	2541400000	6.98012e-06	0.00334707	0.00464547	0	479.514	0.720501	0	2831800	11633000	9478000	1650500000	1849700000	3454200000	0.00171572	0.00628913	0.00274391	0	3.66559	2.29203	944520	4757500	8537000	7538100	2634800000	1335600000	1781200000	0.00180564	0.00639188	0.00423203	0.198533	3.53995	1.51036	0	4326700	11090000	19121000	1584900000	2579400000	2056500000	0.00272995
Thiamine transporter 1	SLC19A2		7477500	1722400	0	504280	3763400000	3519500000	2541400000	0.000457671	0	0.000198426	4.34133	0	0	21021000	6351300	13711000	0	1650500000	1849700000	3454200000	0.00384811	0.00741255	0	3.30972	1.92629	∞	26737000	0	43576000	16823000	2634800000	1335600000	1781200000	0	0.0326265	0.00944476	∞	∞	3.45446	0	0	17093000	11991000	1584900000	2579400000	2056500000	0
Monocarboxylate transporter 4	SLC16A3		1286600	1985000	10271000	7687100	3763400000	3519500000	2541400000	0.000527449	0.00291831	0.00302475	0.648161	5.53288	0.964811	0	2576400	6682000	1755900	1650500000	1849700000	3454200000	0.00156098	0.00361248	0.000508338	0	2.31423	7.10645	0	0	402780	0	2634800000	1335600000	1781200000	0	0.000301572	0	0	∞	∞	1386900	1171300	1487100	848610	1584900000	2579400000	2056500000	0.000739037
Splicing factor, proline- and glutamine-rich;Non-POU domain-containing octamer-binding protein	SFPQ;NONO		2294600	0	0	0	3763400000	3519500000	2541400000	0	0	0	∞	0	0	0	0	0	0	1650500000	1849700000	3454200000	0	0	0	0	0	0	0	0	0	0	2634800000	1335600000	1781200000	0	0	0	0	0	0	1248800	0	0	0	1584900000	2579400000	2056500000	0
14-3-3 protein sigma	SFN		5042100	0	2926400	64880	3763400000	3519500000	2541400000	0	0.000831482	2.55292e-05	∞	∞	32.5698	12067000	146290000	905190	2453100	1650500000	1849700000	3454200000	0.0886337	0.000489371	0.000710179	0.0824868	0.00552127	0.689082	3027900	60855000	51430000	9784900	2634800000	1335600000	1781200000	0.0230966	0.038507	0.00549343	0.049756	1.66721	7.00965	53134000	7335500	9392700	32588000	1584900000	2579400000	2056500000	0.00462837
Protein SET;Protein SETSIP	SET;SETSIP		919450	0	0	0	3763400000	3519500000	2541400000	0	0	0	∞	0	0	0	0	0	0	1650500000	1849700000	3454200000	0	0	0	0	0	0	0	0	5101000	0	2634800000	1335600000	1781200000	0	0.00381926	0	0	∞	∞	3437400	0	2962500	0	1584900000	2579400000	2056500000	0
Serpin B5	SERPINB5		1648800	0	0	0	3763400000	3519500000	2541400000	0	0	0	∞	0	0	0	11331000	2765200	0	1650500000	1849700000	3454200000	0.00686519	0.00149495	0	0	0.217757	∞	8096900	64383000	28275000	4895300	2634800000	1335600000	1781200000	0.0244356	0.0211703	0.00274832	0.125761	0.866368	7.70299	32121000	4579900	14555000	11197000	1584900000	2579400000	2056500000	0.00288971
Serpin B4	SERPINB4		0	0	0	0	3763400000	3519500000	2541400000	0	0	0	0	0	0	0	68455000	0	0	1650500000	1849700000	3454200000	0.0414753	0	0	0	0	0	0	12819000	2609500	0	2634800000	1335600000	1781200000	0.00486526	0.0019538	0	0	0.401582	∞	670550	1078000	5569300	9418800	1584900000	2579400000	2056500000	0.000680169
Serpin B3	SERPINB3		0	0	0	0	3763400000	3519500000	2541400000	0	0	0	0	0	0	0	1924700	0	0	1650500000	1849700000	3454200000	0.00116613	0	0	0	0	0	0	3724400	0	0	2634800000	1335600000	1781200000	0.00141354	0	0	0	0	0	0	0	0	0	1584900000	2579400000	2056500000	0
Serpin B12	SERPINB12		0	0	0	0	3763400000	3519500000	2541400000	0	0	0	0	0	0	0	0	0	0	1650500000	1849700000	3454200000	0	0	0	0	0	0	0	0	0	0	2634800000	1335600000	1781200000	0	0	0	0	0	0	0	0	0	0	1584900000	2579400000	2056500000	0
Suprabasin	SBSN		0	0	0	0	3763400000	3519500000	2541400000	0	0	0	0	0	0	0	0	0	0	1650500000	1849700000	3454200000	0	0	0	0	0	0	2791100	0	0	0	2634800000	1335600000	1781200000	0	0	0	∞	0	0	0	0	0	0	1584900000	2579400000	2056500000	0
Deoxynucleoside triphosphate triphosphohydrolase SAMHD1	SAMHD1		0	0	0	2555500	3763400000	3519500000	2541400000	0	0	0.00100555	0	0	0	0	0	0	2394200	1650500000	1849700000	3454200000	0	0	0.000693127	0	0	0	0	0	3993900	0	2634800000	1335600000	1781200000	0	0.00299034	0	0	∞	∞	0	0	2586800	3108300	1584900000	2579400000	2056500000	0
Protein S100-P	S100P		0	0	0	0	3763400000	3519500000	2541400000	0	0	0	0	0	0	0	0	0	0	1650500000	1849700000	3454200000	0	0	0	0	0	0	0	274340	0	0	2634800000	1335600000	1781200000	0.000104122	0	0	0	0	0	0	128740	1125200	413510	1584900000	2579400000	2056500000	8.12291e-05
Protein S100-A8;Protein S100-A8, N-terminally processed	S100A8		0	0	1064200	0	3763400000	3519500000	2541400000	0	0.000302372	0	0	∞	∞	0	216430000	6378800	8738300	1650500000	1849700000	3454200000	0.13113	0.00344856	0.00252976	0	0.0262988	1.3632	0	122630000	90336000	20481000	2634800000	1335600000	1781200000	0.0465424	0.067637	0.0114984	0	1.45323	5.88228	5529000	8323500	38521000	60969000	1584900000	2579400000	2056500000	0.00525175
Protein S100-A7	S100A7		0	0	0	0	3763400000	3519500000	2541400000	0	0	0	0	0	0	0	2753100	0	0	1650500000	1849700000	3454200000	0.00166804	0	0	0	0	0	0	9737300	0	0	2634800000	1335600000	1781200000	0.00369565	0	0	0	0	0	524300	0	5234700	31206000	1584900000	2579400000	2056500000	0
Protein S100-A6	S100A6		34045000	12423000	9221900	0	3763400000	3519500000	2541400000	0.003301	0.00262023	0	2.74048	0.793768	∞	18316000	6932900	17247000	8968900	1650500000	1849700000	3454200000	0.00420048	0.00932421	0.00259652	2.6419	2.21979	3.59104	3907300	15991000	29782000	5568400	2634800000	1335600000	1781200000	0.00606915	0.0222986	0.00312621	0.244344	3.67409	7.13279	4578800	143430	403680	17162000	1584900000	2579400000	2056500000	9.04978e-05
Protein S100-A2	S100A2		0	0	0	0	3763400000	3519500000	2541400000	0	0	0	0	0	0	0	0	0	0	1650500000	1849700000	3454200000	0	0	0	0	0	0	350430	0	0	0	2634800000	1335600000	1781200000	0	0	0	∞	0	0	176970	0	128130	0	1584900000	2579400000	2056500000	0
Protein S100-A11;Protein S100-A11, N-terminally processed	S100A11		0	0	0	0	3763400000	3519500000	2541400000	0	0	0	0	0	0	0	1743300	0	0	1650500000	1849700000	3454200000	0.00105623	0	0	0	0	0	0	0	0	0	2634800000	1335600000	1781200000	0	0	0	0	0	0	0	0	0	0	1584900000	2579400000	2056500000	0
RuvB-like 1	RUVBL1		0	1179000	0	2977000	3763400000	3519500000	2541400000	0.000313281	0	0.0011714	0	0	0	0	1659100	3316900	1427500	1650500000	1849700000	3454200000	0.00100521	0.00179321	0.000413265	0	1.78391	4.33913	3046400	3197500	3160800	927400	2634800000	1335600000	1781200000	0.00121356	0.00236658	0.00052066	0.952744	1.9501	4.54534	3198200	1465500	4274500	2369000	1584900000	2579400000	2056500000	0.000924664
Ribosome-binding protein 1	RRBP1		0	0	0	0	3763400000	3519500000	2541400000	0	0	0	0	0	0	0	0	0	0	1650500000	1849700000	3454200000	0	0	0	0	0	0	0	0	0	0	2634800000	1335600000	1781200000	0	0	0	0	0	0	483360	0	163190	0	1584900000	2579400000	2056500000	0
40S ribosomal protein SA	RPSA		833550	0	0	0	3763400000	3519500000	2541400000	0	0	0	∞	0	0	0	1513800	502200	1838200	1650500000	1849700000	3454200000	0.000917177	0.000271503	0.000532164	0	0.296021	0.510188	0	11926000	6468700	1588900	2634800000	1335600000	1781200000	0.00452634	0.00484329	0.000892039	0	1.07002	5.42946	7075600	0	4480000	4266200	1584900000	2579400000	2056500000	0
40S ribosomal protein S9	RPS9		949860	0	0	0	3763400000	3519500000	2541400000	0	0	0	∞	0	0	1049900	2224600	1136200	2401200	1650500000	1849700000	3454200000	0.00134783	0.000614262	0.000695154	0.47195	0.45574	0.883634	0	4008900	2391400	1296000	2634800000	1335600000	1781200000	0.00152152	0.00179051	0.000727599	0	1.17679	2.46084	1757600	0	2256700	2289100	1584900000	2579400000	2056500000	0
40S ribosomal protein S7	RPS7		0	128210	0	0	3763400000	3519500000	2541400000	3.40676e-05	0	0	0	0	0	0	0	402810	0	1650500000	1849700000	3454200000	0	0.00021777	0	0	∞	∞	1941700	1052400	829510	0	2634800000	1335600000	1781200000	0.000399423	0.000621077	0	1.84502	1.55493	∞	545220	708730	500820	604800	1584900000	2579400000	2056500000	0.000447176
40S ribosomal protein S5;40S ribosomal protein S5, N-terminally processed	RPS5		0	0	0	0	3763400000	3519500000	2541400000	0	0	0	0	0	0	0	0	0	0	1650500000	1849700000	3454200000	0	0	0	0	0	0	0	2065300	973520	0	2634800000	1335600000	1781200000	0.000783855	0.000728901	0	0	0.929893	∞	0	0	1530300	0	1584900000	2579400000	2056500000	0
40S ribosomal protein S4, X isoform;40S ribosomal protein S4, Y isoform 1	RPS4X;RPS4Y1		201490	806210	2872900	0	3763400000	3519500000	2541400000	0.000214224	0.000816281	0	0.249922	3.81041	∞	1606800	12338000	5617000	12454000	1650500000	1849700000	3454200000	0.00747531	0.00303671	0.00360547	0.130232	0.406232	0.842251	1482900	36775000	13544000	3418700	2634800000	1335600000	1781200000	0.0139574	0.0101408	0.00191932	0.0403236	0.72655	5.28351	10442000	6975900	15033000	16026000	1584900000	2579400000	2056500000	0.00440148
40S ribosomal protein S25	RPS25		0	0	317660	0	3763400000	3519500000	2541400000	0	9.02571e-05	0	0	∞	∞	0	2132400	0	0	1650500000	1849700000	3454200000	0.00129197	0	0	0	0	0	0	6235000	2888800	0	2634800000	1335600000	1781200000	0.0023664	0.00216292	0	0	0.914013	∞	1902300	0	0	0	1584900000	2579400000	2056500000	0
40S ribosomal protein S23	RPS23		0	0	126600	0	3763400000	3519500000	2541400000	0	3.5971e-05	0	0	∞	∞	1590800	0	441060	0	1650500000	1849700000	3454200000	0	0.000238449	0	∞	∞	∞	2442800	5568700	3938700	2588900	2634800000	1335600000	1781200000	0.00211352	0.00294901	0.00145346	0.438666	1.39531	2.02896	1876900	1837200	3390700	5381500	1584900000	2579400000	2056500000	0.00115919
40S ribosomal protein S2	RPS2		0	62284	142840	1457800	3763400000	3519500000	2541400000	1.65499e-05	4.05853e-05	0.000573621	0	2.4523	0.0707529	0	2387700	911900	3187500	1650500000	1849700000	3454200000	0.00144665	0.000492999	0.00092279	0	0.340786	0.534248	0	3878700	6495800	1895800	2634800000	1335600000	1781200000	0.0014721	0.00486358	0.00106434	0	3.30383	4.56958	1221100	1151700	2358700	3753500	1584900000	2579400000	2056500000	0.00072667
40S ribosomal protein S15a	RPS15A		0	0	691830	0	3763400000	3519500000	2541400000	0	0.000196571	0	0	∞	∞	620630	1397800	1407100	0	1650500000	1849700000	3454200000	0.000846895	0.000760718	0	0.444005	0.898244	∞	0	3227800	2394200	1089100	2634800000	1335600000	1781200000	0.00122506	0.0017926	0.000611442	0	1.46327	2.93176	1524300	0	3413600	3610100	1584900000	2579400000	2056500000	0
40S ribosomal protein S13	RPS13		0	0	0	0	3763400000	3519500000	2541400000	0	0	0	0	0	0	0	0	0	0	1650500000	1849700000	3454200000	0	0	0	0	0	0	0	0	0	0	2634800000	1335600000	1781200000	0	0	0	0	0	0	1486500	0	0	2505700	1584900000	2579400000	2056500000	0
40S ribosomal protein S10	RPS10		0	0	0	0	3763400000	3519500000	2541400000	0	0	0	0	0	0	0	0	0	0	1650500000	1849700000	3454200000	0	0	0	0	0	0	0	0	0	1064900	2634800000	1335600000	1781200000	0	0	0.000597855	0	0	0	0	0	1607000	1370000	1584900000	2579400000	2056500000	0
60S ribosomal protein L8	RPL8		0	0	1516500	0	3763400000	3519500000	2541400000	0	0.000430885	0	0	∞	∞	0	0	0	0	1650500000	1849700000	3454200000	0	0	0	0	0	0	0	0	0	0	2634800000	1335600000	1781200000	0	0	0	0	0	0	610410	710230	0	0	1584900000	2579400000	2056500000	0.000448123
60S ribosomal protein L29	RPL29		7141900	3971700	4010500	0	3763400000	3519500000	2541400000	0.00105535	0.00113951	0	1.7982	1.07975	∞	15400000	0	14604000	0	1650500000	1849700000	3454200000	0	0.00789533	0	∞	∞	∞	0	0	6491500	14923000	2634800000	1335600000	1781200000	0	0.00486036	0.00837806	0	∞	0.58013	0	0	5505200	3440700	1584900000	2579400000	2056500000	0
60S ribosomal protein L28	RPL28		0	0	0	0	3763400000	3519500000	2541400000	0	0	0	0	0	0	0	2203700	0	1555700	1650500000	1849700000	3454200000	0.00133517	0	0.000450379	0	0	0	3675100	337680	0	0	2634800000	1335600000	1781200000	0.000128162	0	0	10.8834	0	0	0	737170	0	0	1584900000	2579400000	2056500000	0.000465121
60S ribosomal protein L24	RPL24		623960	0	0	0	3763400000	3519500000	2541400000	0	0	0	∞	0	0	0	0	0	0	1650500000	1849700000	3454200000	0	0	0	0	0	0	2331400	2514900	2547200	1329100	2634800000	1335600000	1781200000	0.000954494	0.00190716	0.000746182	0.927035	1.99808	2.55589	1786700	0	0	4218500	1584900000	2579400000	2056500000	0
60S ribosomal protein L23	RPL23		4876000	0	8136000	0	3763400000	3519500000	2541400000	0	0.00231169	0	∞	∞	∞	0	2623100	7599300	0	1650500000	1849700000	3454200000	0.00158928	0.0041084	0	0	2.58507	∞	6948200	11051000	15224000	6360400	2634800000	1335600000	1781200000	0.00419425	0.0113986	0.00357085	0.628739	2.71768	3.19213	14036000	11976000	28016000	13591000	1584900000	2579400000	2056500000	0.00755631
60S ribosomal protein L22	RPL22		903950	1438200	700450	0	3763400000	3519500000	2541400000	0.000382154	0.00019902	0	0.628529	0.520784	∞	0	5271900	0	0	1650500000	1849700000	3454200000	0.00319412	0	0	0	0	0	0	15456000	25128000	0	2634800000	1335600000	1781200000	0.0058661	0.018814	0	0	3.20724	∞	0	0	0	0	1584900000	2579400000	2056500000	0
60S ribosomal protein L14	RPL14		44107	0	0	0	3763400000	3519500000	2541400000	0	0	0	∞	0	0	0	0	0	0	1650500000	1849700000	3454200000	0	0	0	0	0	0	0	0	1764500	0	2634800000	1335600000	1781200000	0	0.00132113	0	0	∞	∞	0	0	0	0	1584900000	2579400000	2056500000	0
60S ribosomal protein L13	RPL13		0	1056600	0	0	3763400000	3519500000	2541400000	0.000280757	0	0	0	0	0	0	4168800	1938500	1993600	1650500000	1849700000	3454200000	0.00252578	0.00104801	0.000577152	0	0.414924	1.81582	2213900	5359900	3824100	0	2634800000	1335600000	1781200000	0.00203427	0.00286321	0	0.413049	1.40749	∞	2750700	0	5263000	6718400	1584900000	2579400000	2056500000	0
60S ribosomal protein L10a	RPL10A		0	0	37597	0	3763400000	3519500000	2541400000	0	1.06825e-05	0	0	∞	∞	0	578570	1815000	1976600	1650500000	1849700000	3454200000	0.000350542	0.00098124	0.000572231	0	2.79921	1.71476	1588800	5223600	982480	0	2634800000	1335600000	1781200000	0.00198254	0.000735609	0	0.304158	0.371044	∞	1479700	961310	1567800	3710600	1584900000	2579400000	2056500000	0.000606543
GTP-binding nuclear protein Ran	RAN		0	0	0	0	3763400000	3519500000	2541400000	0	0	0	0	0	0	0	0	0	0	1650500000	1849700000	3454200000	0	0	0	0	0	0	0	3731700	2633800	0	2634800000	1335600000	1781200000	0.00141631	0.001972	0	0	1.39235	∞	0	0	0	0	1584900000	2579400000	2056500000	0
Ras-related protein Rab-5C	RAB5C		0	0	0	0	3763400000	3519500000	2541400000	0	0	0	0	0	0	0	0	0	0	1650500000	1849700000	3454200000	0	0	0	0	0	0	0	4562700	0	0	2634800000	1335600000	1781200000	0.00173171	0	0	0	0	0	1137800	0	484660	574660	1584900000	2579400000	2056500000	0
Prostaglandin E synthase 3	PTGES3		0	0	0	0	3763400000	3519500000	2541400000	0	0	0	0	0	0	0	0	0	0	1650500000	1849700000	3454200000	0	0	0	0	0	0	0	5400400	0	0	2634800000	1335600000	1781200000	0.00204964	0	0	0	0	0	0	0	1146000	1827900	1584900000	2579400000	2056500000	0
Proteasome activator complex subunit 1	PSME1		0	0	0	0	3763400000	3519500000	2541400000	0	0	0	0	0	0	0	0	0	0	1650500000	1849700000	3454200000	0	0	0	0	0	0	0	876380	0	0	2634800000	1335600000	1781200000	0.000332617	0	0	0	0	0	0	0	0	0	1584900000	2579400000	2056500000	0
26S protease regulatory subunit 7	PSMC2		0	0	0	269610	3763400000	3519500000	2541400000	0	0	0.000106087	0	0	0	0	0	0	717940	1650500000	1849700000	3454200000	0	0	0.000207846	0	0	0	3347500	912490	1827000	0	2634800000	1335600000	1781200000	0.000346322	0.00136792	0	3.66853	3.94986	∞	1383600	1258900	0	1285500	1584900000	2579400000	2056500000	0.000794309
Peroxiredoxin-6	PRDX6		729170	0	55064	0	3763400000	3519500000	2541400000	0	1.56454e-05	0	∞	∞	∞	2329500	2441100	513560	40310	1650500000	1849700000	3454200000	0.00147901	0.000277645	1.16699e-05	0.954283	0.187724	23.7917	18885000	47122000	28456000	18676000	2634800000	1335600000	1781200000	0.0178845	0.0213058	0.0104851	0.400768	1.1913	2.03201	17215000	8288900	11184000	19543000	1584900000	2579400000	2056500000	0.00522992
Peroxiredoxin-5, mitochondrial	PRDX5		38350	0	0	0	3763400000	3519500000	2541400000	0	0	0	∞	0	0	0	0	0	0	1650500000	1849700000	3454200000	0	0	0	0	0	0	0	1639300	0	0	2634800000	1335600000	1781200000	0.000622172	0	0	0	0	0	0	0	0	0	1584900000	2579400000	2056500000	0
Peroxiredoxin-2	PRDX2		35583	0	1687500	906680	3763400000	3519500000	2541400000	0	0.000479472	0.000356764	∞	∞	1.34395	919340	6932700	2204800	2810400	1650500000	1849700000	3454200000	0.00420036	0.00119198	0.000813618	0.132609	0.28378	1.46503	0	20731000	3261900	3814400	2634800000	1335600000	1781200000	0.00786815	0.00244227	0.00214148	0	0.3104	1.14046	3931900	2578300	2231000	6389900	1584900000	2579400000	2056500000	0.00162679
Peroxiredoxin-1	PRDX1		104650000	18054000	23164000	12433000	3763400000	3519500000	2541400000	0.00479726	0.00658162	0.00489219	5.7965	1.37195	1.34533	61590000	69774000	38366000	40183000	1650500000	1849700000	3454200000	0.0422745	0.0207417	0.0116331	0.882707	0.490645	1.783	142880000	223830000	183860000	106270000	2634800000	1335600000	1781200000	0.0849514	0.137661	0.059662	0.638342	1.62047	2.30735	173010000	115460000	107130000	118660000	1584900000	2579400000	2056500000	0.07285
Peptidyl-prolyl cis-trans isomerase B	PPIB		2336800	0	0	0	3763400000	3519500000	2541400000	0	0	0	∞	0	0	0	0	23173	0	1650500000	1849700000	3454200000	0	1.2528e-05	0	0	∞	∞	0	3426500	1565600	0	2634800000	1335600000	1781200000	0.00130048	0.00117221	0	0	0.901366	∞	1424300	0	0	1046200	1584900000	2579400000	2056500000	0
Peptidyl-prolyl cis-trans isomerase A;Peptidyl-prolyl cis-trans isomerase A, N-terminally processed	PPIA		762540	0	1625400	0	3763400000	3519500000	2541400000	0	0.000461827	0	∞	∞	∞	1812500	12683000	11474000	1830300	1650500000	1849700000	3454200000	0.00768434	0.00620317	0.000529877	0.142908	0.807248	11.7068	7677900	169270000	51592000	22514000	2634800000	1335600000	1781200000	0.064244	0.0386283	0.0126398	0.0453589	0.601276	3.05609	65400000	14358000	30222000	52761000	1584900000	2579400000	2056500000	0.00905925
Protein POF1B	POF1B		0	0	0	0	3763400000	3519500000	2541400000	0	0	0	0	0	0	0	4835500	0	0	1650500000	1849700000	3454200000	0.00292972	0	0	0	0	0	0	316490	0	0	2634800000	1335600000	1781200000	0.000120119	0	0	0	0	0	0	0	468580	0	1584900000	2579400000	2056500000	0
Plastin-3;Plastin-2;Plastin-1	PLS3;LCP1;PLS1		0	0	0	0	3763400000	3519500000	2541400000	0	0	0	0	0	0	0	1150600	0	0	1650500000	1849700000	3454200000	0.000697122	0	0	0	0	0	0	3673100	0	0	2634800000	1335600000	1781200000	0.00139407	0	0	0	0	0	606240	0	595260	0	1584900000	2579400000	2056500000	0
Plectin	PLEC		0	3259900	0	8258800	3763400000	3519500000	2541400000	0.000866211	0	0.0032497	0	0	0	9235500	37686000	16415000	1494800	1650500000	1849700000	3454200000	0.0228331	0.00887441	0.000432749	0.245064	0.388665	20.5071	3517300	0	0	0	2634800000	1335600000	1781200000	0	0	0	∞	0	0	761500	318930	1146200	0	1584900000	2579400000	2056500000	0.00020123
Pyruvate kinase PKM	PKM		22525000	6586500	0	92732	3763400000	3519500000	2541400000	0.00175015	0	3.64885e-05	3.41987	0	0	2579200	32120000	14645000	9499500	1650500000	1849700000	3454200000	0.0194608	0.0079175	0.00275013	0.0802989	0.406844	2.87895	27650000	227950000	98740000	37571000	2634800000	1335600000	1781200000	0.0865151	0.0739293	0.0210931	0.121299	0.854525	3.50491	105060000	8557500	61877000	55395000	1584900000	2579400000	2056500000	0.00539939
Prohibitin-2	PHB2		0	0	1755300	691290	3763400000	3519500000	2541400000	0	0.000498736	0.000272011	0	∞	1.83351	0	1666000	0	2139700	1650500000	1849700000	3454200000	0.00100939	0	0.000619449	0	0	0	1452200	466980	0	214930	2634800000	1335600000	1781200000	0.000177235	0	0.000120666	3.10977	0	0	273590	247160	490650	325330	1584900000	2579400000	2056500000	0.000155947
Phosphoglycerate kinase 1	PGK1		4660100	1466000	49426	0	3763400000	3519500000	2541400000	0.000389541	1.40435e-05	0	3.17879	0.0360513	∞	78524	14844000	1928200	1216600	1650500000	1849700000	3454200000	0.00899364	0.00104244	0.000352209	0.00528995	0.115909	2.95972	5203100	25751000	15716000	4110200	2634800000	1335600000	1781200000	0.00977342	0.011767	0.00230755	0.202054	1.20398	5.09936	19933000	155400	5485500	8866100	1584900000	2579400000	2056500000	9.80504e-05
Serine/threonine-protein phosphatase PGAM5, mitochondrial	PGAM5		0	85965	0	1175800	3763400000	3519500000	2541400000	2.28424e-05	0	0.000462658	0	0	0	2731100	0	4822900	3793000	1650500000	1849700000	3454200000	0	0.0026074	0.00109808	∞	∞	2.3745	0	0	0	0	2634800000	1335600000	1781200000	0	0	0	0	0	0	0	0	0	0	1584900000	2579400000	2056500000	0
Phosphoglycerate mutase 1;Probable phosphoglycerate mutase 4	PGAM1;PGAM4		0	0	0	0	3763400000	3519500000	2541400000	0	0	0	0	0	0	0	0	0	0	1650500000	1849700000	3454200000	0	0	0	0	0	0	0	0	2736500	0	2634800000	1335600000	1781200000	0	0.00204889	0	0	∞	∞	960650	0	519290	0	1584900000	2579400000	2056500000	0
Profilin-1	PFN1		1414800	0	0	0	3763400000	3519500000	2541400000	0	0	0	∞	0	0	0	583180	383410	0	1650500000	1849700000	3454200000	0.000353335	0.000207282	0	0	0.586645	∞	0	9480100	2099300	0	2634800000	1335600000	1781200000	0.00359803	0.0015718	0	0	0.43685	∞	8437200	0	7293800	1946000	1584900000	2579400000	2056500000	0
ATP-dependent 6-phosphofructokinase, platelet type	PFKP		0	0	0	2773900	3763400000	3519500000	2541400000	0	0	0.00109149	0	0	0	0	1707200	0	5305200	1650500000	1849700000	3454200000	0.00103435	0	0.00153587	0	0	0	0	1360400	724400	0	2634800000	1335600000	1781200000	0.00051632	0.000542378	0	0	1.05047	∞	8433900	4208700	7217000	10532000	1584900000	2579400000	2056500000	0.0026555
Protein disulfide-isomerase A3	PDIA3		9397800	0	6595100	0	3763400000	3519500000	2541400000	0	0.00187387	0	∞	∞	∞	0	0	2420600	0	1650500000	1849700000	3454200000	0	0.00130864	0	0	∞	∞	942800	19105000	33622000	0	2634800000	1335600000	1781200000	0.00725102	0.0251737	0	0.0493483	3.47174	∞	13916000	1914000	12095000	14782000	1584900000	2579400000	2056500000	0.00120765
Protein-L-isoaspartate(D-aspartate) O-methyltransferase	PCMT1		0	0	0	0	3763400000	3519500000	2541400000	0	0	0	0	0	0	0	0	0	1168500	1650500000	1849700000	3454200000	0	0	0.000338284	0	0	0	821710	530280	0	0	2634800000	1335600000	1781200000	0.00020126	0	0	1.54958	0	0	690310	439880	428950	209130	1584900000	2579400000	2056500000	0.000277544
Poly(rC)-binding protein 1;Poly(rC)-binding protein 2;Poly(rC)-binding protein 3	PCBP1;PCBP2;PCBP3		0	0	736490	0	3763400000	3519500000	2541400000	0	0.00020926	0	0	∞	∞	0	139590	3389300	0	1650500000	1849700000	3454200000	8.45744e-05	0.00183235	0	0	21.6656	∞	0	5754500	11497000	0	2634800000	1335600000	1781200000	0.00218404	0.00860812	0	0	3.94138	∞	3897000	0	1589800	1723100	1584900000	2579400000	2056500000	0
Proliferation-associated protein 2G4	PA2G4		0	0	0	0	3763400000	3519500000	2541400000	0	0	0	0	0	0	0	0	0	0	1650500000	1849700000	3454200000	0	0	0	0	0	0	0	19117000	0	0	2634800000	1335600000	1781200000	0.00725558	0	0	0	0	0	5300800	0	1103300	0	1584900000	2579400000	2056500000	0
Protein disulfide-isomerase	P4HB		242410	0	0	0	3763400000	3519500000	2541400000	0	0	0	∞	0	0	0	336960	0	1943900	1650500000	1849700000	3454200000	0.000204156	0	0.000562764	0	0	0	1794800	18812000	11636000	0	2634800000	1335600000	1781200000	0.00713982	0.00871219	0	0.0954072	1.22023	∞	11364000	0	4389100	5617100	1584900000	2579400000	2056500000	0
OTU domain-containing protein 4	OTUD4		134640000	72389000	108680000	58119000	3763400000	3519500000	2541400000	0.019235	0.0308794	0.0228689	1.85995	1.60537	1.35028	138700000	66243000	121940000	77893000	1650500000	1849700000	3454200000	0.0401351	0.0659242	0.0225502	2.09381	1.64256	2.92344	449270	98008	353860	1279500	2634800000	1335600000	1781200000	3.71975e-05	0.000264945	0.000718336	4.58401	7.12264	0.368831	340720	5817500	123530	646740	1584900000	2579400000	2056500000	0.00367058
Protein odr-4 homolog	ODR4		0	0	45505	64481	3763400000	3519500000	2541400000	0	1.29294e-05	2.53722e-05	0	∞	0.509588	0	0	0	0	1650500000	1849700000	3454200000	0	0	0	0	0	0	0	2687900	4780200	2446400	2634800000	1335600000	1781200000	0.00102015	0.00357907	0.00137346	0	3.50836	2.60588	4670000	2428100	3140600	3259300	1584900000	2579400000	2056500000	0.00153202
Neuroplastin	NPTN		0	0	0	0	3763400000	3519500000	2541400000	0	0	0	0	0	0	0	0	0	0	1650500000	1849700000	3454200000	0	0	0	0	0	0	0	0	237270	0	2634800000	1335600000	1781200000	0	0.00017765	0	0	∞	∞	146610	107140	0	0	1584900000	2579400000	2056500000	6.76005e-05
Nucleoside diphosphate kinase B;Nucleoside diphosphate kinase A;Putative nucleoside diphosphate kinase	NME2;NME1;NME2P1		0	0	5989700	0	3763400000	3519500000	2541400000	0	0.00170186	0	0	∞	∞	0	0	0	3203500	1650500000	1849700000	3454200000	0	0	0.000927422	0	0	0	0	38560000	13124000	2871200	2634800000	1335600000	1781200000	0.0146349	0.0098263	0.00161195	0	0.67143	6.09592	14821000	1361600	10543000	8874800	1584900000	2579400000	2056500000	0.000859108
Nucleolin	NCL		0	27718	0	0	3763400000	3519500000	2541400000	7.36515e-06	0	0	0	0	0	0	0	0	0	1650500000	1849700000	3454200000	0	0	0	0	0	0	0	0	1996400	0	2634800000	1335600000	1781200000	0	0.00149476	0	0	∞	∞	0	0	0	0	1584900000	2579400000	2056500000	0
Nicotinamide phosphoribosyltransferase	NAMPT		0	0	0	0	3763400000	3519500000	2541400000	0	0	0	0	0	0	0	300500	0	0	1650500000	1849700000	3454200000	0.000182066	0	0	0	0	0	0	2521100	2496100	0	2634800000	1335600000	1781200000	0.000956847	0.0018689	0	0	1.95318	∞	0	0	0	0	1584900000	2579400000	2056500000	0
Nascent polypeptide-associated complex subunit alpha;Nascent polypeptide-associated complex subunit alpha, muscle-specific form	NACA		0	0	0	0	3763400000	3519500000	2541400000	0	0	0	0	0	0	0	0	0	0	1650500000	1849700000	3454200000	0	0	0	0	0	0	0	3422200	3991700	0	2634800000	1335600000	1781200000	0.00129885	0.00298869	0	0	2.30104	∞	2487400	0	0	0	1584900000	2579400000	2056500000	0
Unconventional myosin-Ie	MYO1E		0	0	0	0	3763400000	3519500000	2541400000	0	0	0	0	0	0	0	0	0	0	1650500000	1849700000	3454200000	0	0	0	0	0	0	0	0	0	0	2634800000	1335600000	1781200000	0	0	0	0	0	0	4000900	4157600	3266000	10482000	1584900000	2579400000	2056500000	0.00262326
Unconventional myosin-Ic	MYO1C		0	0	0	500320	3763400000	3519500000	2541400000	0	0	0.000196868	0	0	0	0	0	0	0	1650500000	1849700000	3454200000	0	0	0	0	0	0	0	5045800	0	0	2634800000	1335600000	1781200000	0.00191506	0	0	0	0	0	29137000	17619000	8988800	47237000	1584900000	2579400000	2056500000	0.0111168
Myosin light polypeptide 6	MYL6		57505	0	0	1784800	3763400000	3519500000	2541400000	0	0	0.00070229	∞	0	0	4977400	60733000	4561900	377790	1650500000	1849700000	3454200000	0.0367967	0.00246629	0.000109371	0.0819554	0.0670248	22.5497	121950000	241290000	222230000	391260000	2634800000	1335600000	1781200000	0.0915781	0.16639	0.219661	0.505408	1.81691	0.757484	174010000	134300000	205660000	1028000000	1584900000	2579400000	2056500000	0.0847372
Myosin regulatory light chain 12B	MYL12B		0	0	0	0	3763400000	3519500000	2541400000	0	0	0	0	0	0	0	0	0	0	1650500000	1849700000	3454200000	0	0	0	0	0	0	0	0	0	0	2634800000	1335600000	1781200000	0	0	0	0	0	0	4935800	6775400	8814400	36886000	1584900000	2579400000	2056500000	0.00427497
Myosin light chain 1/3, skeletal muscle isoform;Myosin light chain 3	MYL1;MYL3		0	0	0	0	3763400000	3519500000	2541400000	0	0	0	0	0	0	0	15708000	1487500	1451500	1650500000	1849700000	3454200000	0.00951712	0.000804184	0.000420213	0	0.0844988	1.91375	0	0	0	0	2634800000	1335600000	1781200000	0	0	0	0	0	0	10885000	22267000	20578000	85085000	1584900000	2579400000	2056500000	0.0140495
Myosin-10	MYH10		0	0	0	0	3763400000	3519500000	2541400000	0	0	0	0	0	0	0	0	0	0	1650500000	1849700000	3454200000	0	0	0	0	0	0	0	0	0	0	2634800000	1335600000	1781200000	0	0	0	0	0	0	38117	0	0	90254	1584900000	2579400000	2056500000	0
Major vault protein	MVP		62807	1310100	2054500	0	3763400000	3519500000	2541400000	0.000348116	0.000583748	0	0.0479406	1.67688	∞	3139000	0	0	0	1650500000	1849700000	3454200000	0	0	0	∞	0	0	0	0	0	0	2634800000	1335600000	1781200000	0	0	0	0	0	0	0	0	0	0	1584900000	2579400000	2056500000	0
MOB kinase activator 2	MOB2		406610	0	0	100870	3763400000	3519500000	2541400000	0	0	3.96907e-05	∞	0	0	0	0	0	0	1650500000	1849700000	3454200000	0	0	0	0	0	0	8580700	8754100	10536000	9336800	2634800000	1335600000	1781200000	0.00332249	0.00788859	0.00524186	0.980192	2.3743	1.50492	4585000	9102700	6146200	8924900	1584900000	2579400000	2056500000	0.00574339
Macrophage migration inhibitory factor	MIF		0	0	0	0	3763400000	3519500000	2541400000	0	0	0	0	0	0	0	0	0	0	1650500000	1849700000	3454200000	0	0	0	0	0	0	0	7085500	5975800	2858500	2634800000	1335600000	1781200000	0.0026892	0.00447424	0.00160482	0	1.66378	2.78801	4105900	0	2583300	3057000	1584900000	2579400000	2056500000	0
Mesoderm induction early response protein 1	MIER1		142500000	138900000	177730000	32379000	3763400000	3519500000	2541400000	0.0369081	0.0504987	0.0127406	1.02592	1.36823	3.9636	321000000	96629000	16233000	99548000	1650500000	1849700000	3454200000	0.0585453	0.00877602	0.0288194	3.32198	0.149901	0.304518	45326000	0	0	0	2634800000	1335600000	1781200000	0	0	0	∞	0	0	7984800	45166000	24945000	15859000	1584900000	2579400000	2056500000	0.0284977
Malate dehydrogenase, mitochondrial	MDH2		0	0	0	0	3763400000	3519500000	2541400000	0	0	0	0	0	0	0	0	84380	0	1650500000	1849700000	3454200000	0	4.56182e-05	0	0	∞	∞	0	11143000	4766300	2103900	2634800000	1335600000	1781200000	0.00422916	0.00356866	0.00118117	0	0.843821	3.02129	6796400	393170	5371000	3919300	1584900000	2579400000	2056500000	0.000248072
Mitogen-activated protein kinase kinase kinase 7	MAP3K7		0	1324800	1627400	5712300	3763400000	3519500000	2541400000	0.000352022	0.000462395	0.0022477	0	1.31354	0.205719	0	2583400	1529200	3925300	1650500000	1849700000	3454200000	0.00156522	0.000826729	0.00113638	0	0.528186	0.727508	0	0	0	37301	2634800000	1335600000	1781200000	0	0	2.09415e-05	0	0	0	0	0	0	0	1584900000	2579400000	2056500000	0
Melanoma-associated antigen F1	MAGEF1		140910000	10138000	9278000	1829300	3763400000	3519500000	2541400000	0.00269384	0.00263617	0.0007198	13.8992	0.978592	3.66236	1662800000	9907500000	192380000	114210000	1650500000	1849700000	3454200000	6.00273	0.104006	0.0330641	0.167832	0.0173265	3.14559	27277000000	13345000000	13934000000	39115000000	2634800000	1335600000	1781200000	5.0649	10.4328	21.9599	2.04399	2.05982	0.475082	12141000000	21052000000	30060000000	11909000000	1584900000	2579400000	2056500000	13.2829
Leucine-rich PPR motif-containing protein, mitochondrial	LRPPRC		0	0	0	0	3763400000	3519500000	2541400000	0	0	0	0	0	0	0	447300	0	0	1650500000	1849700000	3454200000	0.000271009	0	0	0	0	0	0	76284	0	0	2634800000	1335600000	1781200000	2.89525e-05	0	0	0	0	0	674570	0	0	160570	1584900000	2579400000	2056500000	0
Heterogeneous nuclear ribonucleoprotein C-like 1;Heterogeneous nuclear ribonucleoprotein C-like 2;Heterogeneous nuclear ribonucleoproteins C1/C2	LOC649330;HNRNPCL1;HNRNPCL2;HNRNPC		0	0	0	0	3763400000	3519500000	2541400000	0	0	0	0	0	0	0	813010	0	0	1650500000	1849700000	3454200000	0.000492584	0	0	0	0	0	0	0	0	0	2634800000	1335600000	1781200000	0	0	0	0	0	0	0	0	0	1045800	1584900000	2579400000	2056500000	0
Lamin-B1	LMNB1		0	0	0	0	3763400000	3519500000	2541400000	0	0	0	0	0	0	0	1439900	0	797620	1650500000	1849700000	3454200000	0.000872402	0	0.000230913	0	0	0	0	0	0	0	2634800000	1335600000	1781200000	0	0	0	0	0	0	0	0	0	0	1584900000	2579400000	2056500000	0
Prelamin-A/C;Lamin-A/C	LMNA		0	0	0	46253	3763400000	3519500000	2541400000	0	0	1.81998e-05	0	0	0	0	37576000	0	0	1650500000	1849700000	3454200000	0.0227664	0	0	0	0	0	0	20995000	12133000	3073400	2634800000	1335600000	1781200000	0.00796835	0.00908431	0.00172547	0	1.14005	5.26484	15625000	557720	15573000	5824600	1584900000	2579400000	2056500000	0.000351896
Galectin-7	LGALS7		0	0	0	0	3763400000	3519500000	2541400000	0	0	0	0	0	0	0	141920000	0	0	1650500000	1849700000	3454200000	0.0859861	0	0	0	0	0	0	9860100	1348400	0	2634800000	1335600000	1781200000	0.00374226	0.00100958	0	0	0.269779	∞	1362500	0	0	1558300	1584900000	2579400000	2056500000	0
Galectin-3-binding protein	LGALS3BP		0	0	0	0	3763400000	3519500000	2541400000	0	0	0	0	0	0	0	0	0	1212700	1650500000	1849700000	3454200000	0	0	0.00035108	0	0	0	0	0	2525400	0	2634800000	1335600000	1781200000	0	0.00189084	0	0	∞	∞	643260	0	2294800	0	1584900000	2579400000	2056500000	0
Galectin-3	LGALS3		0	0	0	0	3763400000	3519500000	2541400000	0	0	0	0	0	0	0	1834800	0	0	1650500000	1849700000	3454200000	0.00111166	0	0	0	0	0	0	2114700	0	1025300	2634800000	1335600000	1781200000	0.000802604	0	0.000575623	0	0	0	1169400	0	1337100	1623000	1584900000	2579400000	2056500000	0
Galectin-1	LGALS1		1745900	403630	1147700	0	3763400000	3519500000	2541400000	0.000107251	0.000326097	0	4.3255	3.0405	∞	0	1990500	2433900	0	1650500000	1849700000	3454200000	0.001206	0.00131584	0	0	1.09108	∞	29286000	35731000	29714000	20836000	2634800000	1335600000	1781200000	0.0135612	0.0222477	0.0116977	0.819624	1.64054	1.90188	15471000	11165000	16342000	17302000	1584900000	2579400000	2056500000	0.00704461
L-lactate dehydrogenase B chain	LDHB		367750	0	0	0	3763400000	3519500000	2541400000	0	0	0	∞	0	0	368860	2108300	2963700	2624100	1650500000	1849700000	3454200000	0.00127737	0.00160226	0.000759684	0.174956	1.25434	2.10911	7428800	19581000	2222900	3088600	2634800000	1335600000	1781200000	0.00743168	0.00166435	0.001734	0.379388	0.223953	0.95983	12141000	390980	6186900	4917400	1584900000	2579400000	2056500000	0.000246691
L-lactate dehydrogenase A chain	LDHA		4577000	1805400	1366400	764990	3763400000	3519500000	2541400000	0.000479726	0.000388237	0.000301011	2.53517	0.809289	1.28978	6878200	38751000	8459900	7450900	1650500000	1849700000	3454200000	0.0234783	0.00457366	0.00215706	0.177497	0.194803	2.12033	7098200	104880000	37601000	15350000	2634800000	1335600000	1781200000	0.0398057	0.0281529	0.00861779	0.0676793	0.707258	3.26684	67684000	2693700	16809000	19424000	1584900000	2579400000	2056500000	0.0016996
Cytosol aminopeptidase	LAP3		0	0	0	0	3763400000	3519500000	2541400000	0	0	0	0	0	0	0	0	0	0	1650500000	1849700000	3454200000	0	0	0	0	0	0	0	1312500	0	0	2634800000	1335600000	1781200000	0.00049814	0	0	0	0	0	995770	1662100	0	112160	1584900000	2579400000	2056500000	0.00104871
Laminin subunit beta-3	LAMB3		0	0	0	0	3763400000	3519500000	2541400000	0	0	0	0	0	0	0	922040	0	0	1650500000	1849700000	3454200000	0.000558643	0	0	0	0	0	0	0	0	0	2634800000	1335600000	1781200000	0	0	0	0	0	0	0	0	0	0	1584900000	2579400000	2056500000	0
Keratin, type II cytoskeletal 2 epidermal	KRT2		2129000000	1690500000	2783200000	1786700000	3763400000	3519500000	2541400000	0.449195	0.790794	0.703038	1.25939	1.76047	1.12482	1350300000	4160700000	1422600000	1513000000	1650500000	1849700000	3454200000	2.52087	0.769098	0.438017	0.324537	0.305092	1.75586	1201800000	1689500000	726330000	343420000	2634800000	1335600000	1781200000	0.641225	0.543823	0.192803	0.711335	0.8481	2.82062	372260000	845450000	2619900000	1259000000	1584900000	2579400000	2056500000	0.533441
Keratin, type I cytoskeletal 18	KRT18		0	0	9684300	2142400	3763400000	3519500000	2541400000	0	0.00275161	0.000843	0	∞	3.26407	11454000	10190000	6145800	12384000	1650500000	1849700000	3454200000	0.00617389	0.00332259	0.0035852	1.12404	0.538169	0.926752	0	1768800	2015600	0	2634800000	1335600000	1781200000	0.000671322	0.00150913	0	0	2.248	∞	175120	0	5884600	5986100	1584900000	2579400000	2056500000	0
Lysine-specific histone demethylase 1A	KDM1A		0	59117	358910	2487500	3763400000	3519500000	2541400000	1.57084e-05	0.000101978	0.000978791	0	6.49191	0.104187	0	2825900	5119500	3418700	1650500000	1849700000	3454200000	0.00171215	0.00276775	0.000989723	0	1.61653	2.79649	65344000	8612700	2403600	4183700	2634800000	1335600000	1781200000	0.00326882	0.00179964	0.00234881	7.58694	0.550547	0.766193	24356000	17324000	7765400	4165400	1584900000	2579400000	2056500000	0.0109307
Junction plakoglobin	JUP		2853300	0	349020	1817600	3763400000	3519500000	2541400000	0	9.91675e-05	0.000715196	∞	∞	0.138658	0	55903000	721450	0	1650500000	1849700000	3454200000	0.0338703	0.000390036	0	0	0.0115156	∞	4576800	10190000	1024200	0	2634800000	1335600000	1781200000	0.00386747	0.000766846	0	0.449146	0.198281	∞	0	0	5880400	788560	1584900000	2579400000	2056500000	0
Tyrosine-protein kinase JAK1	JAK1		3566900	3317900	3625200	9456800	3763400000	3519500000	2541400000	0.000881623	0.00103003	0.0037211	1.07505	1.16834	0.276809	10534000	34117000	4553100	9463200	1650500000	1849700000	3454200000	0.0206707	0.00246153	0.00273962	0.308761	0.119083	0.898494	21085000	7597000	12641000	9021500	2634800000	1335600000	1781200000	0.00288333	0.00946466	0.00506484	2.77544	3.28254	1.8687	41311000	45035000	14206000	8570900	1584900000	2579400000	2056500000	0.028415
Interferon regulatory factor 6	IRF6		0	0	0	0	3763400000	3519500000	2541400000	0	0	0	0	0	0	0	0	0	0	1650500000	1849700000	3454200000	0	0	0	0	0	0	5548100	7193400	4576700	3340000	2634800000	1335600000	1781200000	0.00273015	0.0034267	0.00187514	0.771276	1.25513	1.82744	7091900	5139100	4736100	3416100	1584900000	2579400000	2056500000	0.00324254
Inosine-5-monophosphate dehydrogenase 2	IMPDH2		101150	0	0	0	3763400000	3519500000	2541400000	0	0	0	∞	0	0	0	583790	304620	0	1650500000	1849700000	3454200000	0.000353705	0.000164686	0	0	0.465603	∞	2651800	3432100	2890300	0	2634800000	1335600000	1781200000	0.0013026	0.00216405	0	0.772646	1.66132	∞	2953100	236660	1028200	270880	1584900000	2579400000	2056500000	0.000149322
Ig kappa chain C region	IGKC		0	0	0	0	3763400000	3519500000	2541400000	0	0	0	0	0	0	0	104400000	0	0	1650500000	1849700000	3454200000	0.0632536	0	0	0	0	0	0	6146300	0	0	2634800000	1335600000	1781200000	0.00233274	0	0	0	0	0	1229400	1359900	1315700	2990200	1584900000	2579400000	2056500000	0.000858035
Ig gamma-1 chain C region;Ig gamma-4 chain C region;Ig gamma-3 chain C region	IGHG1;IGHG4;IGHG3		0	0	0	0	3763400000	3519500000	2541400000	0	0	0	0	0	0	0	10025000	0	0	1650500000	1849700000	3454200000	0.00607392	0	0	0	0	0	0	0	0	0	2634800000	1335600000	1781200000	0	0	0	0	0	0	0	0	0	0	1584900000	2579400000	2056500000	0
Interferon-induced protein with tetratricopeptide repeats 3	IFIT3		0	0	0	0	3763400000	3519500000	2541400000	0	0	0	0	0	0	0	438580	0	0	1650500000	1849700000	3454200000	0.000265726	0	0	0	0	0	0	5517600	0	0	2634800000	1335600000	1781200000	0.00209412	0	0	0	0	0	0	0	6167700	653110	1584900000	2579400000	2056500000	0
60 kDa heat shock protein, mitochondrial	HSPD1		21501000	12703000	6195600	5133500	3763400000	3519500000	2541400000	0.00337541	0.00176036	0.00201995	1.69259	0.521527	0.871489	3631100	16142000	22213000	10287000	1650500000	1849700000	3454200000	0.00978007	0.012009	0.00297811	0.224947	1.2279	4.03241	4963300	89418000	39520000	15428000	2634800000	1335600000	1781200000	0.0339373	0.0295897	0.00866158	0.0555067	0.871893	3.4162	36049000	913920	26022000	26563000	1584900000	2579400000	2056500000	0.000576642
Heat shock cognate 71 kDa protein	HSPA8		17868000	26528000	73285000	51359000	3763400000	3519500000	2541400000	0.00704895	0.0208226	0.0202089	0.673552	2.954	1.03036	26153000	107070000	226200000	198290000	1650500000	1849700000	3454200000	0.0648713	0.12229	0.0574055	0.244261	1.88512	2.13029	60845000	292820000	444210000	584780000	2634800000	1335600000	1781200000	0.111136	0.332592	0.328307	0.20779	2.99267	1.01305	118990000	159170000	771730000	671690000	1584900000	2579400000	2056500000	0.100429
Endoplasmin	HSP90B1		2472300	0	0	0	3763400000	3519500000	2541400000	0	0	0	∞	0	0	0	3952300	2347800	0	1650500000	1849700000	3454200000	0.00239461	0.00126929	0	0	0.53006	∞	0	0	3597000	0	2634800000	1335600000	1781200000	0	0.00269317	0	0	∞	∞	3417600	0	0	1712200	1584900000	2579400000	2056500000	0
Heat shock protein HSP 90-beta	HSP90AB1		0	0	78488	0	3763400000	3519500000	2541400000	0	2.23009e-05	0	0	∞	∞	0	7173700	3227500	78317	1650500000	1849700000	3454200000	0.00434638	0.00174488	2.2673e-05	0	0.401455	76.9585	0	7911700	2208300	1200400	2634800000	1335600000	1781200000	0.00300277	0.00165341	0.000673928	0	0.55063	2.4534	7562500	827810	7058600	8265800	1584900000	2579400000	2056500000	0.000522311
Heat shock protein HSP 90-alpha	HSP90AA1		10214000	3419700	2563100	0	3763400000	3519500000	2541400000	0.000908673	0.000728257	0	2.98681	0.801451	∞	11238000	42504000	16740000	7300500	1650500000	1849700000	3454200000	0.0257522	0.00905012	0.00211351	0.264399	0.351431	4.28202	8498800	45998000	39746000	19663000	2634800000	1335600000	1781200000	0.0174579	0.0297589	0.0110392	0.184765	1.70461	2.69575	65181000	7252800	33284000	32734000	1584900000	2579400000	2056500000	0.00457619
Peroxisomal multifunctional enzyme type 2;(3R)-hydroxyacyl-CoA dehydrogenase;Enoyl-CoA hydratase 2	HSD17B4		0	0	0	0	3763400000	3519500000	2541400000	0	0	0	0	0	0	0	0	0	0	1650500000	1849700000	3454200000	0	0	0	0	0	0	0	6308800	0	0	2634800000	1335600000	1781200000	0.00239441	0	0	0	0	0	1914400	0	583690	1587800	1584900000	2579400000	2056500000	0
3-hydroxyacyl-CoA dehydrogenase type-2	HSD17B10		0	0	0	0	3763400000	3519500000	2541400000	0	0	0	0	0	0	0	2517500	0	788360	1650500000	1849700000	3454200000	0.0015253	0	0.000228232	0	0	0	815980	1780300	624830	0	2634800000	1335600000	1781200000	0.000675687	0.000467827	0	0.458338	0.692373	∞	1618600	181680	653420	301220	1584900000	2579400000	2056500000	0.000114632
Homer protein homolog 1	HOMER1		0	0	11472000	0	3763400000	3519500000	2541400000	0	0.00325955	0	0	∞	∞	0	0	0	0	1650500000	1849700000	3454200000	0	0	0	0	0	0	28802000	5464600	5004700	0	2634800000	1335600000	1781200000	0.00207401	0.00374715	0	5.27065	1.80672	∞	0	0	0	0	1584900000	2579400000	2056500000	0
Heterogeneous nuclear ribonucleoprotein L	HNRNPL		0	0	0	0	3763400000	3519500000	2541400000	0	0	0	0	0	0	0	0	0	0	1650500000	1849700000	3454200000	0	0	0	0	0	0	0	0	0	0	2634800000	1335600000	1781200000	0	0	0	0	0	0	180400	0	0	0	1584900000	2579400000	2056500000	0
Heterogeneous nuclear ribonucleoprotein K	HNRNPK		5879900	2900500	79971	1638500	3763400000	3519500000	2541400000	0.000770713	2.27223e-05	0.000644723	2.0272	0.0294821	0.0352434	2862000	17117000	3175000	4937600	1650500000	1849700000	3454200000	0.0103708	0.00171649	0.00142945	0.167202	0.165512	1.20081	10665000	24593000	16745000	3507600	2634800000	1335600000	1781200000	0.00933392	0.0125374	0.00196923	0.43366	1.34321	6.36666	9249700	6790000	9056500	11887000	1584900000	2579400000	2056500000	0.00428418
Heterogeneous nuclear ribonucleoprotein H;Heterogeneous nuclear ribonucleoprotein H, N-terminally processed	HNRNPH1		23240000	14375000	15048000	2122600	3763400000	3519500000	2541400000	0.00381968	0.00427561	0.000835209	1.6167	1.11936	5.11921	16418000	23896000	8358400	5501000	1650500000	1849700000	3454200000	0.014478	0.00451879	0.00159255	0.687061	0.312113	2.83745	54932000	42088000	39063000	39481000	2634800000	1335600000	1781200000	0.0159739	0.0292475	0.0221654	1.30517	1.83096	1.31951	42148000	44457000	37153000	25426000	1584900000	2579400000	2056500000	0.0280504
Heterogeneous nuclear ribonucleoprotein D0;Heterogeneous nuclear ribonucleoprotein D-like	HNRNPD;HNRNPDL		0	0	0	0	3763400000	3519500000	2541400000	0	0	0	0	0	0	0	0	0	0	1650500000	1849700000	3454200000	0	0	0	0	0	0	0	13363000	2203400	0	2634800000	1335600000	1781200000	0.00507173	0.00164975	0	0	0.325282	∞	0	0	0	2400600	1584900000	2579400000	2056500000	0
High mobility group protein B2	HMGB2		0	0	0	0	3763400000	3519500000	2541400000	0	0	0	0	0	0	0	0	0	0	1650500000	1849700000	3454200000	0	0	0	0	0	0	9219300	24591000	14862000	0	2634800000	1335600000	1781200000	0.00933316	0.0111276	0	0.374905	1.19226	∞	13564000	0	11645000	24709000	1584900000	2579400000	2056500000	0
Histone H2A type 2-C;Histone H2A type 2-A;Histone H2A.V;Histone H2A.Z;Histone H2A type 1-A	HIST2H2AC;HIST2H2AA3;H2AFV;H2AFZ;HIST1H2AA		0	0	0	752780	3763400000	3519500000	2541400000	0	0	0.000296207	0	0	0	9285700	8774300	0	9657500	1650500000	1849700000	3454200000	0.00531615	0	0.00279587	1.05828	0	0	0	0	0	0	2634800000	1335600000	1781200000	0	0	0	0	0	0	0	0	1858700	7643400	1584900000	2579400000	2056500000	0
Histone H2B type 1-L;Histone H2B type 1-M;Histone H2B type 1-N;Histone H2B type 1-H;Histone H2B type 3-B;Histone H2B type 2-F;Histone H2B type 2-E;Histone H2B type 1-C/E/F/G/I;Histone H2B type 1-D;Histone H2B type F-S;Histone H2B type 1-B;Histone H2B type 1-O;Histone H2B type 1-J;Histone H2B type 1-K;Histone H2B type 1-A	HIST1H2BL;HIST1H2BM;HIST1H2BN;HIST1H2BH;HIST3H2BB;HIST2H2BF;HIST2H2BE;HIST1H2BC;HIST1H2BD;H2BFS;HIST1H2BB;HIST1H2BO;HIST1H2BJ;HIST1H2BK;HIST1H2BA		83008	0	0	0	3763400000	3519500000	2541400000	0	0	0	∞	0	0	43537000	27784000	17276000	21601000	1650500000	1849700000	3454200000	0.0168337	0.00933989	0.00625355	1.56698	0.554833	1.49354	2307700	21690000	0	6889000	2634800000	1335600000	1781200000	0.00823212	0	0.00386762	0.106395	0	0	3986000	2988700	25180000	27842000	1584900000	2579400000	2056500000	0.00188573
Hydroxyacylglutathione hydrolase, mitochondrial	HAGH		0	0	0	0	3763400000	3519500000	2541400000	0	0	0	0	0	0	0	0	0	0	1650500000	1849700000	3454200000	0	0	0	0	0	0	1766900	0	0	207070	2634800000	1335600000	1781200000	0	0	0.000116253	∞	0	0	1057200	695400	376350	0	1584900000	2579400000	2056500000	0.000438766
Glutathione S-transferase omega-1	GSTO1		0	0	0	0	3763400000	3519500000	2541400000	0	0	0	0	0	0	0	339140	0	0	1650500000	1849700000	3454200000	0.000205477	0	0	0	0	0	3796300	6567000	5503400	0	2634800000	1335600000	1781200000	0.00249241	0.00412055	0	0.578087	1.65324	∞	3080800	2924600	3184700	1261800	1584900000	2579400000	2056500000	0.00184529
Gasdermin-A	GSDMA		0	0	0	0	3763400000	3519500000	2541400000	0	0	0	0	0	0	0	3804900	0	0	1650500000	1849700000	3454200000	0.0023053	0	0	0	0	0	0	0	0	0	2634800000	1335600000	1781200000	0	0	0	0	0	0	0	0	0	0	1584900000	2579400000	2056500000	0
Glutamate dehydrogenase 1, mitochondrial;Glutamate dehydrogenase 2, mitochondrial	GLUD1;GLUD2		0	0	0	0	3763400000	3519500000	2541400000	0	0	0	0	0	0	0	0	0	0	1650500000	1849700000	3454200000	0	0	0	0	0	0	0	6226400	0	0	2634800000	1335600000	1781200000	0.00236314	0	0	0	0	0	1734600	0	1982300	1408800	1584900000	2579400000	2056500000	0
Transcriptional repressor p66-alpha	GATAD2A		0	3886000	2263800	3044900	3763400000	3519500000	2541400000	0.00103258	0.000643216	0.00119812	0	0.622923	0.536855	0	0	2772400	2824100	1650500000	1849700000	3454200000	0	0.00149884	0.000817584	0	∞	1.83325	0	0	0	0	2634800000	1335600000	1781200000	0	0	0	0	0	0	0	156000	338370	131600	1584900000	2579400000	2056500000	9.84289e-05
Glyceraldehyde-3-phosphate dehydrogenase	GAPDH		47070000	15578000	6575700	1667700	3763400000	3519500000	2541400000	0.00413934	0.00186836	0.000656213	3.02157	0.451367	2.84719	18279000	49582000	40957000	3440800	1650500000	1849700000	3454200000	0.0300406	0.0221425	0.000996121	0.368662	0.737086	22.2287	52078000	264580000	91917000	47760000	2634800000	1335600000	1781200000	0.100417	0.0688208	0.0268134	0.196833	0.685346	2.56666	136260000	3966700	79932000	67682000	1584900000	2579400000	2056500000	0.00250281
Neutral alpha-glucosidase AB	GANAB		0	0	0	0	3763400000	3519500000	2541400000	0	0	0	0	0	0	0	0	0	0	1650500000	1849700000	3454200000	0	0	0	0	0	0	0	0	0	0	2634800000	1335600000	1781200000	0	0	0	0	0	0	1457200	126050	70015	128580	1584900000	2579400000	2056500000	7.95318e-05
Ras GTPase-activating protein-binding protein 1	G3BP1		0	0	0	0	3763400000	3519500000	2541400000	0	0	0	0	0	0	0	0	0	0	1650500000	1849700000	3454200000	0	0	0	0	0	0	0	7451100	2115700	0	2634800000	1335600000	1781200000	0.00282796	0.00158408	0	0	0.560151	∞	1703600	718260	3815900	3151900	1584900000	2579400000	2056500000	0.000453189
RNA-binding protein FUS;TATA-binding protein-associated factor 2N	FUS;TAF15		5892900	5155200	70973	0	3763400000	3519500000	2541400000	0.00136983	2.01656e-05	0	1.1431	0.0147213	∞	4017100	0	0	320520	1650500000	1849700000	3454200000	0	0	9.27914e-05	∞	0	0	656810	2450500	2951200	539780	2634800000	1335600000	1781200000	0.000930052	0.00220964	0.000303043	0.268031	2.37583	7.29152	924940	3009800	0	2334200	1584900000	2579400000	2056500000	0.00189905
Fascin	FSCN1		0	0	0	0	3763400000	3519500000	2541400000	0	0	0	0	0	0	0	0	0	0	1650500000	1849700000	3454200000	0	0	0	0	0	0	539040	4895900	3070500	936150	2634800000	1335600000	1781200000	0.00185817	0.00229897	0.000525573	0.1101	1.23722	4.37421	1559200	0	1579700	2290200	1584900000	2579400000	2056500000	0
Filamin-A	FLNA		0	0	0	0	3763400000	3519500000	2541400000	0	0	0	0	0	0	0	1696600	0	0	1650500000	1849700000	3454200000	0.00102793	0	0	0	0	0	0	0	0	0	2634800000	1335600000	1781200000	0	0	0	0	0	0	0	0	0	0	1584900000	2579400000	2056500000	0
Peptidyl-prolyl cis-trans isomerase FKBP1A	FKBP1A		0	0	0	0	3763400000	3519500000	2541400000	0	0	0	0	0	0	0	680210	739310	0	1650500000	1849700000	3454200000	0.000412124	0.000399692	0	0	0.969835	∞	0	0	0	0	2634800000	1335600000	1781200000	0	0	0	0	0	0	3896800	0	2915900	3939000	1584900000	2579400000	2056500000	0
Fatty acid-binding protein, epidermal	FABP5		0	0	0	0	3763400000	3519500000	2541400000	0	0	0	0	0	0	0	0	0	0	1650500000	1849700000	3454200000	0	0	0	0	0	0	0	4112300	1522900	0	2634800000	1335600000	1781200000	0.00156076	0.00114024	0	0	0.730563	∞	608660	0	0	4231900	1584900000	2579400000	2056500000	0
Ezrin	EZR		2097500	0	0	0	3763400000	3519500000	2541400000	0	0	0	∞	0	0	0	4645800	488280	0	1650500000	1849700000	3454200000	0.00281478	0.000263978	0	0	0.0937827	∞	0	6349900	0	0	2634800000	1335600000	1781200000	0.00241001	0	0	0	0	0	4574400	0	0	0	1584900000	2579400000	2056500000	0
RNA-binding protein EWS	EWSR1		0	0	0	0	3763400000	3519500000	2541400000	0	0	0	0	0	0	0	0	0	0	1650500000	1849700000	3454200000	0	0	0	0	0	0	0	3434400	0	0	2634800000	1335600000	1781200000	0.00130348	0	0	0	0	0	0	0	0	816850	1584900000	2579400000	2056500000	0
Epiplakin	EPPK1		70078	0	0	0	3763400000	3519500000	2541400000	0	0	0	∞	0	0	2358800	17267000	0	0	1650500000	1849700000	3454200000	0.0104617	0	0	0.136607	0	0	0	0	0	0	2634800000	1335600000	1781200000	0	0	0	0	0	0	0	0	0	0	1584900000	2579400000	2056500000	0
Alpha-enolase	ENO1		58206000	156980	203910	0	3763400000	3519500000	2541400000	4.17123e-05	5.79372e-05	0	370.786	1.38897	∞	2277400	14560000	5969600	24568000	1650500000	1849700000	3454200000	0.00882157	0.00322733	0.0071125	0.156415	0.365846	0.453755	50221000	209650000	121320000	44623000	2634800000	1335600000	1781200000	0.0795696	0.0908356	0.0250522	0.239547	1.14159	3.62585	247250000	9255500	100070000	62873000	1584900000	2579400000	2056500000	0.0058398
Emerin	EMD		0	0	5189100	3300300	3763400000	3519500000	2541400000	0	0.00147439	0.00129861	0	∞	1.13535	0	0	0	6501700	1650500000	1849700000	3454200000	0	0	0.00188226	0	0	0	0	0	0	0	2634800000	1335600000	1781200000	0	0	0	0	0	0	0	0	1298100	575130	1584900000	2579400000	2056500000	0
Eukaryotic translation initiation factor 6	EIF6		0	0	0	0	3763400000	3519500000	2541400000	0	0	0	0	0	0	0	0	0	0	1650500000	1849700000	3454200000	0	0	0	0	0	0	0	0	0	0	2634800000	1335600000	1781200000	0	0	0	0	0	0	1476800	0	0	0	1584900000	2579400000	2056500000	0
Eukaryotic translation initiation factor 5A-2;Eukaryotic translation initiation factor 5A-1-like;Eukaryotic translation initiation factor 5A-1	EIF5A2;EIF5AL1;EIF5A		0	0	0	0	3763400000	3519500000	2541400000	0	0	0	0	0	0	0	177820	0	0	1650500000	1849700000	3454200000	0.000107737	0	0	0	0	0	0	6185200	3604800	0	2634800000	1335600000	1781200000	0.0023475	0.00269901	0	0	1.14974	∞	4068200	0	1750000	4293600	1584900000	2579400000	2056500000	0
Eukaryotic translation initiation factor 4E type 2	EIF4E2		0	0	0	0	3763400000	3519500000	2541400000	0	0	0	0	0	0	0	0	0	1175600	1650500000	1849700000	3454200000	0	0	0.000340339	0	0	0	2500900	1456300	946560	0	2634800000	1335600000	1781200000	0.000552717	0.000708715	0	1.7173	1.28224	∞	1082900	785700	776070	418700	1584900000	2579400000	2056500000	0.000495741
Eukaryotic initiation factor 4A-I	EIF4A1		1252000	0	541300	0	3763400000	3519500000	2541400000	0	0.0001538	0	∞	∞	∞	0	21558000	412190	1462500	1650500000	1849700000	3454200000	0.0130615	0.000222842	0.000423398	0	0.017061	0.526317	0	21945000	11856000	2313300	2634800000	1335600000	1781200000	0.00832891	0.00887691	0.00129873	0	1.0658	6.83506	13188000	0	8152900	8416300	1584900000	2579400000	2056500000	0
Elongation factor 2	EEF2		1412100	0	0	0	3763400000	3519500000	2541400000	0	0	0	∞	0	0	979740	6408900	1540000	0	1650500000	1849700000	3454200000	0.00388301	0.000832567	0	0.152872	0.214413	∞	0	1687300	1135100	0	2634800000	1335600000	1781200000	0.00064039	0.00084988	0	0	1.32713	∞	13012000	0	4201100	2443300	1584900000	2579400000	2056500000	0
Elongation factor 1-delta	EEF1D		0	0	0	0	3763400000	3519500000	2541400000	0	0	0	0	0	0	0	0	0	1349100	1650500000	1849700000	3454200000	0	0	0.000390568	0	0	0	0	7903400	3399000	0	2634800000	1335600000	1781200000	0.00299962	0.00254492	0	0	0.848415	∞	3426800	0	2447400	1724100	1584900000	2579400000	2056500000	0
Desmoplakin	DSP		5269300	2165600	5593500	10403000	3763400000	3519500000	2541400000	0.000575437	0.00158929	0.00409341	2.43318	2.76188	0.388255	1009500	68523000	8890300	3553200	1650500000	1849700000	3454200000	0.0415165	0.00480635	0.00102866	0.0147323	0.11577	4.67243	1171100	5261800	0	1534800	2634800000	1335600000	1781200000	0.00199704	0	0.000861666	0.222566	0	0	424760	583420	4883600	698470	1584900000	2579400000	2056500000	0.000368112
Desmoglein-1	DSG1		0	3416500	8545300	189360	3763400000	3519500000	2541400000	0.000907823	0.00242799	7.45101e-05	0	2.67452	32.586	14561000	10542000	1802200	975600	1650500000	1849700000	3454200000	0.00638716	0.00097432	0.000282439	1.38124	0.152544	3.44967	0	0	637750	1821500	2634800000	1335600000	1781200000	0	0.000477501	0.00102263	0	∞	0.466936	0	0	69642	1998200	1584900000	2579400000	2056500000	0
Desmocollin-1	DSC1		1862300	3129300	0	1755500	3763400000	3519500000	2541400000	0.000831509	0	0.000690761	0.595117	0	0	0	14869000	2673500	0	1650500000	1849700000	3454200000	0.00900879	0.00144537	0	0	0.16044	∞	0	2003000	0	0	2634800000	1335600000	1781200000	0.00076021	0	0	0	0	0	126960	4564400	4154400	2726600	1584900000	2579400000	2056500000	0.00287993
DnaJ homolog subfamily A member 3, mitochondrial	DNAJA3		0	0	611850	0	3763400000	3519500000	2541400000	0	0.000173846	0	0	∞	∞	0	0	0	1627000	1650500000	1849700000	3454200000	0	0	0.000471021	0	0	0	0	393820	0	0	2634800000	1335600000	1781200000	0.000149469	0	0	0	0	0	0	0	737810	0	1584900000	2579400000	2056500000	0
Dystrophin	DMD		5051000	38206000	22568000	44420000	3763400000	3519500000	2541400000	0.010152	0.00641227	0.0174786	0.132204	0.631627	0.366865	8620500	3821800	0	46083000	1650500000	1849700000	3454200000	0.00231554	0	0.0133411	2.25561	0	0	0	0	18449000	0	2634800000	1335600000	1781200000	0	0.0138133	0	0	∞	∞	0	0	0	0	1584900000	2579400000	2056500000	0
Dihydrolipoyl dehydrogenase, mitochondrial	DLD		0	0	0	0	3763400000	3519500000	2541400000	0	0	0	0	0	0	0	0	0	0	1650500000	1849700000	3454200000	0	0	0	0	0	0	0	3673500	0	0	2634800000	1335600000	1781200000	0.00139422	0	0	0	0	0	1596200	0	1436700	1518300	1584900000	2579400000	2056500000	0
7-dehydrocholesterol reductase	DHCR7		0	0	0	0	3763400000	3519500000	2541400000	0	0	0	0	0	0	0	0	0	0	1650500000	1849700000	3454200000	0	0	0	0	0	0	0	1852300	1786400	0	2634800000	1335600000	1781200000	0.000703014	0.00133753	0	0	1.90256	∞	0	0	0	0	1584900000	2579400000	2056500000	0
Probable ATP-dependent RNA helicase DDX41	DDX41		0	0	0	0	3763400000	3519500000	2541400000	0	0	0	0	0	0	0	0	2977200	0	1650500000	1849700000	3454200000	0	0.00160956	0	0	∞	∞	0	0	0	0	2634800000	1335600000	1781200000	0	0	0	0	0	0	0	1740200	0	0	1584900000	2579400000	2056500000	0.00109799
Dermcidin;Survival-promoting peptide;DCD-1	DCD		0	0	13844000	4994000	3763400000	3519500000	2541400000	0	0.00393351	0.00196506	0	∞	2.00173	17599000	13413000	8668000	7694200	1650500000	1849700000	3454200000	0.00812663	0.00468617	0.00222749	1.31209	0.576643	2.10379	0	0	315410	0	2634800000	1335600000	1781200000	0	0.000236156	0	0	∞	∞	0	2131900	3889900	0	1584900000	2579400000	2056500000	0.00134513
Cathepsin D;Cathepsin D light chain;Cathepsin D heavy chain	CTSD		984780	240530	745370	0	3763400000	3519500000	2541400000	6.3913e-05	0.000211783	0	4.09421	3.31362	∞	0	1537900	0	917650	1650500000	1849700000	3454200000	0.000931778	0	0.000265662	0	0	0	0	15641000	2643700	849400	2634800000	1335600000	1781200000	0.00593631	0.00197941	0.00047687	0	0.333441	4.15084	2508200	922790	2442800	2347200	1584900000	2579400000	2056500000	0.000582239
Cellular retinoic acid-binding protein 2	CRABP2		0	0	0	0	3763400000	3519500000	2541400000	0	0	0	0	0	0	0	4352700	0	0	1650500000	1849700000	3454200000	0.0026372	0	0	0	0	0	0	0	0	0	2634800000	1335600000	1781200000	0	0	0	0	0	0	0	0	0	0	1584900000	2579400000	2056500000	0
Cytochrome c oxidase subunit 4 isoform 1, mitochondrial	COX4I1		0	0	0	0	3763400000	3519500000	2541400000	0	0	0	0	0	0	0	1087500	0	0	1650500000	1849700000	3454200000	0.000658891	0	0	0	0	0	0	0	0	0	2634800000	1335600000	1781200000	0	0	0	0	0	0	0	0	1073400	0	1584900000	2579400000	2056500000	0
Carboxymethylenebutenolidase homolog	CMBL		6786700	3864600	4617000	506600	3763400000	3519500000	2541400000	0.00102689	0.00131183	0.000199339	1.75612	1.27748	6.58092	10252000	1229400	7769000	2256400	1650500000	1849700000	3454200000	0.000744865	0.00420014	0.000653234	8.33903	5.63879	6.42977	10806000	17588000	4490400	455370	2634800000	1335600000	1781200000	0.00667527	0.00336208	0.000255653	0.614396	0.503663	13.1509	17898000	10972000	16041000	713050	1584900000	2579400000	2056500000	0.00692283
Chloride intracellular channel protein 1	CLIC1		0	0	0	0	3763400000	3519500000	2541400000	0	0	0	0	0	0	0	0	1437400	1006500	1650500000	1849700000	3454200000	0	0.000777099	0.000291384	0	∞	2.66692	0	8173000	5029000	1816600	2634800000	1335600000	1781200000	0.00310194	0.00376535	0.00101987	0	1.21387	3.69197	2519500	0	1644200	1350700	1584900000	2579400000	2056500000	0
Cytoskeleton-associated protein 4	CKAP4		0	0	0	0	3763400000	3519500000	2541400000	0	0	0	0	0	0	0	884090	0	0	1650500000	1849700000	3454200000	0.00053565	0	0	0	0	0	0	749220	0	0	2634800000	1335600000	1781200000	0.000284356	0	0	0	0	0	498520	0	296880	327820	1584900000	2579400000	2056500000	0
Chromodomain-helicase-DNA-binding protein 4;Chromodomain-helicase-DNA-binding protein 5	CHD4;CHD5		0	1393600	3423500	1051600	3763400000	3519500000	2541400000	0.000370303	0.000972723	0.000413788	0	2.62683	2.35078	0	489500	1779000	0	1650500000	1849700000	3454200000	0.000296577	0.000961778	0	0	3.24293	∞	0	0	0	0	2634800000	1335600000	1781200000	0	0	0	0	0	0	0	0	0	702030	1584900000	2579400000	2056500000	0
Cofilin-1	CFL1		2324100	0	0	0	3763400000	3519500000	2541400000	0	0	0	∞	0	0	30005000	9357500	38184000	609460	1650500000	1849700000	3454200000	0.00566949	0.0206433	0.00017644	3.20652	3.64113	116.999	0	153260000	305820000	153000000	2634800000	1335600000	1781200000	0.0581676	0.228976	0.0858971	0	3.93648	2.6657	10612000	68758000	4337000	162470000	1584900000	2579400000	2056500000	0.0433832
T-complex protein 1 subunit gamma	CCT3		0	40025000	60520000	85022000	3763400000	3519500000	2541400000	0.0106353	0.0171956	0.0334548	0	1.61684	0.513996	0	38284000	90517000	80447000	1650500000	1849700000	3454200000	0.0231954	0.048936	0.0232896	0	2.10973	2.1012	3043900	58618000	72088000	121880000	2634800000	1335600000	1781200000	0.0222476	0.0539742	0.0684258	0.0519277	2.42607	0.7888	5562000	47926000	161490000	144970000	1584900000	2579400000	2056500000	0.0302391
T-complex protein 1 subunit beta	CCT2		0	45233000	78334000	52979000	3763400000	3519500000	2541400000	0.0120192	0.0222571	0.0208464	0	1.8518	1.06767	0	42519000	170310000	159710000	1650500000	1849700000	3454200000	0.0257613	0.0920744	0.0462365	0	3.57414	1.99138	0	57022000	89043000	129710000	2634800000	1335600000	1781200000	0.0216419	0.0666689	0.0728217	0	3.08055	0.915509	4108000	68663000	231610000	232370000	1584900000	2579400000	2056500000	0.0433232
Girdin	CCDC88A		0	0	0	663160	3763400000	3519500000	2541400000	0	0	0.000260943	0	0	0	0	0	0	0	1650500000	1849700000	3454200000	0	0	0	0	0	0	0	0	0	0	2634800000	1335600000	1781200000	0	0	0	0	0	0	0	0	0	0	1584900000	2579400000	2056500000	0
Caveolin-1	CAV1		0	0	0	0	3763400000	3519500000	2541400000	0	0	0	0	0	0	0	0	0	0	1650500000	1849700000	3454200000	0	0	0	0	0	0	41740000	4708600	5333700	3138200	2634800000	1335600000	1781200000	0.00178708	0.00399349	0.00176185	8.86463	2.23464	2.26665	7046100	0	1221300	0	1584900000	2579400000	2056500000	0
F-actin-capping protein subunit alpha-1	CAPZA1		127670	0	0	0	3763400000	3519500000	2541400000	0	0	0	∞	0	0	0	55095	356090	0	1650500000	1849700000	3454200000	3.33808e-05	0.000192512	0	0	5.76716	∞	0	3400800	0	0	2634800000	1335600000	1781200000	0.00129072	0	0	0	0	0	0	2776100	8586100	14894000	1584900000	2579400000	2056500000	0.00175159
Calpain small subunit 1	CAPNS1		0	0	0	0	3763400000	3519500000	2541400000	0	0	0	0	0	0	0	0	0	0	1650500000	1849700000	3454200000	0	0	0	0	0	0	0	1938400	273040	0	2634800000	1335600000	1781200000	0.000735692	0.000204432	0	0	0.277878	∞	2476100	0	0	0	1584900000	2579400000	2056500000	0
Macrophage-capping protein	CAPG		2860900	0	0	0	3763400000	3519500000	2541400000	0	0	0	∞	0	0	0	1031400	0	0	1650500000	1849700000	3454200000	0.000624902	0	0	0	0	0	0	0	0	0	2634800000	1335600000	1781200000	0	0	0	0	0	0	100220	0	0	0	1584900000	2579400000	2056500000	0
Adenylyl cyclase-associated protein 1	CAP1		0	0	0	0	3763400000	3519500000	2541400000	0	0	0	0	0	0	0	0	0	0	1650500000	1849700000	3454200000	0	0	0	0	0	0	0	0	0	0	2634800000	1335600000	1781200000	0	0	0	0	0	0	0	0	0	0	1584900000	2579400000	2056500000	0
Calmodulin-like protein 5	CALML5		0	0	0	0	3763400000	3519500000	2541400000	0	0	0	0	0	0	0	0	705990	0	1650500000	1849700000	3454200000	0	0.000381678	0	0	∞	∞	0	0	0	0	2634800000	1335600000	1781200000	0	0	0	0	0	0	0	0	0	6738600	1584900000	2579400000	2056500000	0
Calmodulin-like protein 3	CALML3		0	0	0	0	3763400000	3519500000	2541400000	0	0	0	0	0	0	0	932040	0	0	1650500000	1849700000	3454200000	0.000564702	0	0	0	0	0	0	0	0	2383800	2634800000	1335600000	1781200000	0	0	0.00133831	0	0	0	0	0	0	0	1584900000	2579400000	2056500000	0
Complement component 1 Q subcomponent-binding protein, mitochondrial	C1QBP		77552	0	0	0	3763400000	3519500000	2541400000	0	0	0	∞	0	0	841200	0	0	0	1650500000	1849700000	3454200000	0	0	0	∞	0	0	0	2822600	0	0	2634800000	1335600000	1781200000	0.00107128	0	0	0	0	0	2088400	0	2334100	0	1584900000	2579400000	2056500000	0
Basigin	BSG		0	0	0	1883700	3763400000	3519500000	2541400000	0	0	0.000741206	0	0	0	0	0	3297900	2135800	1650500000	1849700000	3454200000	0	0.00178294	0.00061832	0	∞	2.88352	2124900	9085100	2316300	2558700	2634800000	1335600000	1781200000	0.00344812	0.00173428	0.0014365	0.233888	0.502963	1.20729	5851500	772800	3105800	2167500	1584900000	2579400000	2056500000	0.000487602
ATP synthase subunit delta, mitochondrial	ATP5D		0	0	0	0	3763400000	3519500000	2541400000	0	0	0	0	0	0	0	601200	1751100	2369300	1650500000	1849700000	3454200000	0.000364253	0.000946694	0.000685919	0	2.599	1.38018	0	9961400	2219400	0	2634800000	1335600000	1781200000	0.0037807	0.00166173	0	0	0.439528	∞	2158400	1393700	3242200	3243700	1584900000	2579400000	2056500000	0.000879361
ATP synthase subunit gamma, mitochondrial	ATP5C1		454940	0	1120900	99175	3763400000	3519500000	2541400000	0	0.000318483	3.90238e-05	∞	∞	8.16125	0	4198300	3647600	1288900	1650500000	1849700000	3454200000	0.00254365	0.001972	0.00037314	0	0.775261	5.28487	2501700	4490100	5797600	596010	2634800000	1335600000	1781200000	0.00170415	0.00434082	0.000334611	0.557159	2.5472	12.9727	3463400	2466300	10073000	7688300	1584900000	2579400000	2056500000	0.00155612
ATP synthase subunit beta, mitochondrial	ATP5B		3645100	763480	270440	91680	3763400000	3519500000	2541400000	0.00020287	7.68405e-05	3.60746e-05	4.77432	0.378767	2.13004	1455700	9771900	7746400	5258100	1650500000	1849700000	3454200000	0.00592057	0.00418792	0.00152223	0.148968	0.707351	2.75117	2892100	70220000	35779000	13134000	2634800000	1335600000	1781200000	0.026651	0.0267887	0.00737368	0.0411863	1.00517	3.63302	54115000	0	31152000	32300000	1584900000	2579400000	2056500000	0
Sodium/potassium-transporting ATPase subunit alpha-3;Sodium/potassium-transporting ATPase subunit alpha-2;Sodium/potassium-transporting ATPase subunit alpha-1;Potassium-transporting ATPase alpha chain 1	ATP1A3;ATP1A2;ATP1A1;ATP4A		12460000	3136300	2626900	0	3763400000	3519500000	2541400000	0.000833369	0.000746384	0	3.97283	0.895623	∞	88454000	0	0	0	1650500000	1849700000	3454200000	0	0	0	∞	0	0	3223700	0	0	0	2634800000	1335600000	1781200000	0	0	0	∞	0	0	10219000	0	0	0	1584900000	2579400000	2056500000	0
ATPase family AAA domain-containing protein 3C;ATPase family AAA domain-containing protein 3A;ATPase family AAA domain-containing protein 3B	ATAD3C;ATAD3A;ATAD3B		0	0	0	0	3763400000	3519500000	2541400000	0	0	0	0	0	0	0	0	1318400	2240100	1650500000	1849700000	3454200000	0	0.000712764	0.000648515	0	∞	1.09907	0	0	0	0	2634800000	1335600000	1781200000	0	0	0	0	0	0	551830	0	1906100	1083500	1584900000	2579400000	2056500000	0
ADP-ribosylation factor 5;ADP-ribosylation factor 1;ADP-ribosylation factor 3	ARF5;ARF1;ARF3		96547	0	0	0	3763400000	3519500000	2541400000	0	0	0	∞	0	0	0	974570	0	0	1650500000	1849700000	3454200000	0.00059047	0	0	0	0	0	0	2568800	0	0	2634800000	1335600000	1781200000	0.000974951	0	0	0	0	0	0	0	0	0	1584900000	2579400000	2056500000	0
Annexin A5	ANXA5		2328900	0	19892	0	3763400000	3519500000	2541400000	0	5.65194e-06	0	∞	∞	∞	0	0	73723	0	1650500000	1849700000	3454200000	0	3.98567e-05	0	0	∞	∞	1362200	19355000	11031000	2883700	2634800000	1335600000	1781200000	0.00734591	0.00825921	0.00161896	0.0703797	1.12433	5.10154	15019000	0	4837100	7848500	1584900000	2579400000	2056500000	0
Annexin A4	ANXA4		1833900	0	0	0	3763400000	3519500000	2541400000	0	0	0	∞	0	0	0	0	0	0	1650500000	1849700000	3454200000	0	0	0	0	0	0	0	827170	1068300	0	2634800000	1335600000	1781200000	0.00031394	0.000799865	0	0	2.54783	∞	0	0	573630	573900	1584900000	2579400000	2056500000	0
Annexin A3	ANXA3		0	0	0	0	3763400000	3519500000	2541400000	0	0	0	0	0	0	0	1882100	0	0	1650500000	1849700000	3454200000	0.00114032	0	0	0	0	0	0	0	0	0	2634800000	1335600000	1781200000	0	0	0	0	0	0	0	0	457740	0	1584900000	2579400000	2056500000	0
Annexin A2;Putative annexin A2-like protein	ANXA2;ANXA2P2		30466000	8545300	11934000	4692600	3763400000	3519500000	2541400000	0.00227063	0.00339082	0.00184646	3.56523	1.49334	1.83639	12680000	109480000	84502000	40998000	1650500000	1849700000	3454200000	0.0663314	0.0456842	0.011869	0.11582	0.688726	3.84902	32505000	547670000	327420000	152950000	2634800000	1335600000	1781200000	0.20786	0.245148	0.0858691	0.0593514	1.17939	2.85491	111960000	31194000	157530000	142620000	1584900000	2579400000	2056500000	0.019682
Annexin A1	ANXA1		13012000	1609400	2788600	0	3763400000	3519500000	2541400000	0.000427645	0.000792328	0	8.085	1.85277	∞	8722200	14254000	12697000	2671300	1650500000	1849700000	3454200000	0.00863617	0.00686436	0.000773348	0.611912	0.794838	8.87615	15591000	181030000	82836000	27450000	2634800000	1335600000	1781200000	0.0687073	0.0620216	0.015411	0.0861238	0.902692	4.02451	87034000	7037900	46298000	36059000	1584900000	2579400000	2056500000	0.0044406
Fructose-bisphosphate aldolase A	ALDOA		2200300	0	593000	0	3763400000	3519500000	2541400000	0	0.00016849	0	∞	∞	∞	787060	14963000	7202200	5513000	1650500000	1849700000	3454200000	0.00906574	0.00389371	0.00159603	0.0526004	0.429498	2.43963	4525600	74109000	23039000	2034800	2634800000	1335600000	1781200000	0.028127	0.0172499	0.00114238	0.0610668	0.613287	15.1	24195000	1212900	14205000	5816400	1584900000	2579400000	2056500000	0.000765285
Aflatoxin B1 aldehyde reductase member 2	AKR7A2		0	0	0	2161000	3763400000	3519500000	2541400000	0	0	0.000850319	0	0	0	1747000	0	0	0	1650500000	1849700000	3454200000	0	0	0	∞	0	0	49267000	42730000	51159000	39967000	2634800000	1335600000	1781200000	0.0162175	0.0383041	0.0224382	1.15298	2.36189	1.70709	37664000	30144000	28605000	39559000	1584900000	2579400000	2056500000	0.0190195
A-kinase anchor protein 8	AKAP8		0	0	0	0	3763400000	3519500000	2541400000	0	0	0	0	0	0	0	0	0	0	1650500000	1849700000	3454200000	0	0	0	0	0	0	0	0	0	0	2634800000	1335600000	1781200000	0	0	0	0	0	0	0	0	0	0	1584900000	2579400000	2056500000	0
Apoptosis-inducing factor 1, mitochondrial	AIFM1		0	0	0	5010600	3763400000	3519500000	2541400000	0	0	0.00197159	0	0	0	0	0	1578000	4554000	1650500000	1849700000	3454200000	0	0.000853111	0.00131839	0	∞	0.647083	0	0	0	0	2634800000	1335600000	1781200000	0	0	0	0	0	0	3379000	0	4242400	3699700	1584900000	2579400000	2056500000	0
Adenosylhomocysteinase	AHCY		0	0	0	0	3763400000	3519500000	2541400000	0	0	0	0	0	0	0	0	0	0	1650500000	1849700000	3454200000	0	0	0	0	0	0	0	7334300	2169100	0	2634800000	1335600000	1781200000	0.00278363	0.00162406	0	0	0.583435	∞	4706200	685110	2201900	0	1584900000	2579400000	2056500000	0.000432273
Alpha-actinin-4;Alpha-actinin-1	ACTN4;ACTN1		8077800	0	1233700	186750	3763400000	3519500000	2541400000	0	0.000350533	7.34831e-05	∞	∞	4.77025	4072800	0	5119700	2189200	1650500000	1849700000	3454200000	0	0.00276785	0.000633779	∞	∞	4.36722	2960500	4139900	0	1482800	2634800000	1335600000	1781200000	0.00157124	0	0.000832472	0.715114	0	0	15757000	14886000	9167600	11270000	1584900000	2579400000	2056500000	0.00939239
Actin, alpha skeletal muscle;Actin, alpha cardiac muscle 1;Actin, gamma-enteric smooth muscle;Actin, aortic smooth muscle	ACTA1;ACTC1;ACTG2;ACTA2		3691400	119550	228950	0	3763400000	3519500000	2541400000	3.17665e-05	6.50519e-05	0	30.8775	2.04781	∞	9515100	12396000	7764400	21757000	1650500000	1849700000	3454200000	0.00751045	0.00419765	0.00629871	0.767594	0.558908	0.666431	39730000	111410000	0	46655000	2634800000	1335600000	1781200000	0.042284	0	0.026193	0.356611	0	0	23037000	35302000	66766000	120820000	1584900000	2579400000	2056500000	0.022274
Acetyl-coenzyme A synthetase, cytoplasmic	ACSS2		18517000	298420	0	0	3763400000	3519500000	2541400000	7.92953e-05	0	0	62.0501	0	0	17105000	12297000	14795000	39359000	1650500000	1849700000	3454200000	0.00745047	0.00799859	0.0113945	1.39099	1.07357	0.701968	8979300	240890000	0	0	2634800000	1335600000	1781200000	0.0914263	0	0	0.0372755	0	0	487630000	761890000	802220000	288240000	1584900000	2579400000	2056500000	0.480718
Long-chain-fatty-acid--CoA ligase 3	ACSL3		0	0	0	0	3763400000	3519500000	2541400000	0	0	0	0	0	0	0	0	0	0	1650500000	1849700000	3454200000	0	0	0	0	0	0	0	1152600	0	0	2634800000	1335600000	1781200000	0.000437453	0	0	0	0	0	1067700	0	2490300	1631500	1584900000	2579400000	2056500000	0
			3631900	9695600	55128000	57601000	3763400000	3519500000	2541400000	0.00257629	0.0156636	0.0226651	0.374593	6.07991	0.691089	10470000	45812000	189740000	88161000	1650500000	1849700000	3454200000	0.0277564	0.102579	0.0255228	0.228543	3.69568	4.0191	15849000	172940000	537680000	680230000	2634800000	1335600000	1781200000	0.0656369	0.402576	0.381894	0.0916445	6.13338	1.05415	26672000	73345000	606530000	560440000	1584900000	2579400000	2056500000	0.0462774
Ig heavy chain V-III region VH26			0	0	0	0	3763400000	3519500000	2541400000	0	0	0	0	0	0	0	2101800	0	0	1650500000	1849700000	3454200000	0.00127343	0	0	0	0	0	0	0	0	0	2634800000	1335600000	1781200000	0	0	0	0	0	0	0	0	0	0	1584900000	2579400000	2056500000	0
[truncated: 19 more columns]

## Sheet: S1E. Nuclear Assoc Pr Hits
Table S1E. 15 nuclear associated protein hit proteins from MCF-10a cells
Enriched proteins from Table S1D showing nuclear localization (see column E)
The number of trials where each protein shows a ratio of wild type to mutant and a ratio of mutant to mutant + SAHA between 0.56 and 1.8, with also higher intensity in wild type compared to the no protein control
The color coding of each row corresponds to the number of trials where that protein was enriched: 3 trials (yellow highlight) or 2 trials (grey highlight)
Protein names	Gene names	Protein ID	Number of trials enriched	Cellular Localization
Metastasis-associated protein MTA2	MTA2	MTA2	4	N
Protein arginine N-methyltransferase 5;Protein arginine N-methyltransferase 5, N-terminally processed	PRMT5	PRMT5	4	N
REST corepressor 1	RCOR1	RCOR1	4	N
Transcriptional repressor p66-beta	GATAD2B	GATAD2B	3	N
Histone H2A type 1-J;Histone H2A type 1-H;Histone H2A.J;Histone H2A type 1-C;Histone H2A type 3;Histone H2A type 1-D;Histone H2A type 1;Histone H2A type 1-B/E;Histone H2AX;Histone H2A type 2-B	HIST1H2AJ;HIST1H2AH;H2AFJ;HIST1H2AC;HIST3H2A;HIST1H2AD;HIST1H2AG;HIST1H2AB;H2AFX;HIST2H2AB	HIST1H2AJ	3	N/C
Serine/threonine-protein kinase 38	STK38	STK38	3	N/C
Histone deacetylase 2	HDAC2	HDAC2	2	N
Heterogeneous nuclear ribonucleoprotein F;Heterogeneous nuclear ribonucleoprotein F, N-terminally processed	HNRNPF	HNRNPF	2	N
Methyl-CpG-binding domain protein 2	MBD2	MBD2	2	N
Metastasis-associated protein MTA3	MTA3	MTA3	2	N
Thyroid hormone receptor-associated protein 3	THRAP3	THRAP3	2	N
Methylosome subunit pICln	CLNS1A	CLNS1A	2	N/C
Small nuclear ribonucleoprotein Sm D1	SNRPD1	SNRPD1	2	N/C
Methylosome protein 50	WDR77	WDR77	2	N/C
Stress-70 protein, mitochondrial	HSPA9	HSPA9	2	N/M
