# Supplementary material for: Differential profiles of HDAC1 substrates and associated proteins in breast cancer cells revealed by trapping
Source: Royal Society of Chemistry journal article supplement (doi:10.1039/d0mo00047g), 2021-04-06
Supplement: d0mo00047g2.xlsx [file d0mo00047g2.xlsx]

## Sheet: S2A. Raw MS Data
Table S2A. 403 proteins quantified using MaxQuant from MDA-MB-468 cells
Raw values from MaxQuant label-free quantitation are shown for all 403 proteins observed in six independent LC-MS/MS trials from MDA-MB-468 cells
Intensity values for each identified peptide are shown in columns C through Z. The top of each column indicates the sample: No protein- immunoprecipitation of untransfected cell (no HDAC1-Flag expressed bead binding control); WT- immunoprecipitated from cell lysated expressing wild type HDAC1-Flag; MUT- immunoprecitated from cell lysates expressing C151A mutant HDAC1-Flag; MUT+SAHA- SAHA was incl…
Multiple protein and gene names are listed when the peptide identified by LC-MS/MS is found in multiple isoforms of the protein.
HDAC1 levels (see top yellow highlighted row) were compared to determine if samples within each trial had similar immunoprecipitated proteins. Trial 3 showed significantly different HDAC1 levels in MT, MUT, and MUT+SAHA samples within the trial (see columns C-F in red) and was removed. The remaining five trials (Trials 1-2 and 4-6, columns C-J and O-Z) were used in subsequent analysis (Tables S4).
Protein names	Gene names	Trial 1- No protein	Trial 1- WT	Trial 1- MUT	Trial 1- MUT+SAHA	Trial 2- No protein	Trial 2- WT	Trial 2- MUT	Trial 2- MUT+SAHA	Trial 3- No protein	Trial 3- WT	Trial 3- MUT	Trial 3- MUT+SAHA	Trial 3- No protein	Trial 4- WT	Trial 4- MUT	Trial 4- MUT+SAHA	Trial 5- No protein	Trial 5- WT	Trial 5- MUT	Trial 5- MUT+SAHA	Trial 6- No protein	Trial 6- WT	Trial 6- MUT	Trial 6- MUT+SAHA
Histone deacetylase 1	HDAC1	21039000	865460000	887390000	995240000	32520000	876600000	1078500000	1138700000	21264000	792320	2086400000	1698600000	20785000	234260000	547210000	689590000	18397000	747130000	737750000	625580000	16464000	752070000	733350000	663290000
Metastasis-associated protein MTA3;Metastasis-associated protein MTA1	MTA3;MTA1	0	0	0	0	0	0	24825000	0	0	0	19136000	0	0	0	0	0	0	14352000	4038400	18104000	0	6913000	21938000	18936000
60S ribosomal protein L32	RPL32	0	0	0	0	0	0	3933400	0	0	0	320780	0	0	0	0	0	7303800	16263000	13291000	25017000	3984500	18580000	39443000	22558000
Plasminogen activator inhibitor 1 RNA-binding protein	SERBP1	0	0	0	1681200	0	7867700	22046000	2385300	0	1045500	11565000	1096500	0	0	10121000	2374400	4874500	46543000	45376000	47210000	15019000	27690000	62431000	49142000
T-complex protein 1 subunit delta	CCT4	0	20644000	43183000	16175000	7811700	0	51123000	31394000	0	0	82606000	43139000	0	7605700	13649000	34252000	5210800	30916000	67172000	71763000	2020900	53121000	89837000	71752000
T-complex protein 1 subunit gamma	CCT3	17563000	84854000	158620000	124280000	0	47179000	186060000	105450000	6716300	12270000	284060000	211740000	23894000	67235000	95950000	48778000	5813400	68052000	64158000	59304000	18254000	58671000	97008000	51542000
Transaldolase	TALDO1	0	1086400	0	6708900	0	6003900	26828000	0	0	0	0	0	0	0	0	0	0	0	1605200	176930	0	0	2670300	0
REST corepressor 1;REST corepressor 3	RCOR1;RCOR3	0	0	0	4804800	0	0	9063400	4370300	0	0	26386000	8108000	22000000	0	0	4934700	0	5740300	8300500	2826700	0	8366400	4101100	5223400
Mitochondrial 2-oxoglutarate/malate carrier protein	SLC25A11	0	0	5424400	0	0	0	9771900	0	13694000	0	0	0	13067000	0	2475700	8934000	8285400	19537000	25509000	19739000	5469500	11642000	24290000	24054000
T-complex protein 1 subunit theta	CCT8	0	40696000	50303000	161980000	14923000	45878000	92613000	64267000	13076000	0	145470000	92088000	43641000	0	37347000	53182000	4216600	36113000	52364000	41933000	7695200	43461000	61654000	49911000
Paired amphipathic helix protein Sin3a	SIN3A	0	48203000	42519000	60299000	0	11491000	75954000	24369000	0	0	197350000	148960000	0	13228000	4125700	48495000	0	64268000	93240000	64988000	7600100	58307000	73130000	70610000
Unconventional myosin-Id	MYO1D	0	440960000	102620000	168340000	28242000	89216000	161570000	105140000	14543000	0	14630000	0	16767000	160470000	14774000	111570000	18368000	65212000	114840000	94821000	52187000	61839000	112580000	30315000
T-complex protein 1 subunit beta	CCT2	3450500	0	100960000	125220000	0	59656000	200590000	156600000	0	0	227980000	209850000	21287000	0	5631400	91864000	24838000	59842000	141000000	95556000	24729000	72127000	121790000	84621000
Rho guanine nucleotide exchange factor 10	ARHGEF10	0	0	5691800	4823800	0	9777700	0	0	0	0	2065100	0	0	0	0	2650000	0	0	0	0	0	0	0	0
Alpha-1-antitrypsin;Short peptide from AAT	SERPINA1	0	0	12229000	0	0	0	0	0	8218000	0	0	0	0	0	1131500000	0	0	0	0	0	0	0	0	0
40S ribosomal protein S5;40S ribosomal protein S5, N-terminally processed	RPS5	0	0	0	0	0	0	12819000	6480600	0	11109000	0	0	0	16580000	0	0	5312200	7041600	0	0	0	0	8987300	6917100
Glutathione S-transferase P	GSTP1	0	15950000	10893000	0	0	30776000	0	0	0	0	0	0	0	0	1444200	0	2904200	4227400	9893500	8946200	0	0	13298000	8180900
S-adenosylmethionine synthase isoform type-2	MAT2A	13672000	0	0	0	0	0	16233000	0	0	0	13301000	10422000	41921000	0	5202200	7855300	6200500	0	8479000	0	31787000	0	14604000	4221300
Ribose-phosphate pyrophosphokinase 1;Ribose-phosphate pyrophosphokinase 3;Ribose-phosphate pyrophosphokinase 2	PRPS1;PRPS1L1;PRPS2	0	0	17602000	0	14365000	3616400	0	12963000	0	0	9635400	0	0	0	0	2731100	5057300	903600	837930	397150	5089200	814450	0	562440
Little elongation complex subunit 1	ICE1	0	6340200	8660100	4372800	0	1408400	0	0	0	0	8022200	0	0	0	0	0	0	1551000	1037300	1471400	1168700	1432100	860060	2143900
60S ribosomal protein L28	RPL28	0	4124300	30064000	0	0	0	23040000	0	0	6860200	0	0	0	5002500	8453800	0	3404400	0	283010	529300	3194200	3914700	799290	608560
Solute carrier family 2, facilitated glucose transporter member 1	SLC2A1	0	15987000	0	0	0	25303000	26616000	0	0	0	20561000	11847000	0	0	0	0	0	6247600	4913400	5373300	0	7311500	11158000	7574200
Peptidyl-prolyl cis-trans isomerase A;Peptidyl-prolyl cis-trans isomerase A, N-terminally processed;Peptidyl-prolyl cis-trans isomerase A-like 4A/B/C;Peptidyl-prolyl cis-trans isomerase A-like 4D	PPIA;PPIAL4F;PPIAL4A;PPIAL4D	28479000	0	0	12741000	0	14026000	48411000	17712000	0	0	14336000	19718000	0	0	18672000	0	36371000	14379000	29967000	17542000	28613000	7665200	70841000	23284000
Methyl-CpG-binding domain protein 3	MBD3	0	0	26703000	3356700	0	0	0	5377800	0	0	0	7573200	0	0	0	0	0	7102500	8451900	7460200	0	8526600	10257000	0
Src substrate cortactin	CTTN	0	13903000	0	15375000	0	16873000	29669000	7984400	0	0	6797900	0	0	4671800	0	14382000	19083000	15131000	22629000	15290000	30063000	12804000	20426000	13019000
60S ribosomal protein L34	RPL34	0	0	39114000	12597000	0	22277000	15026000	29544000	0	0	9947100	10682000	0	0	0	7164400	19129000	16888000	19945000	18986000	6395200	18988000	27885000	22399000
T-complex protein 1 subunit epsilon	CCT5	0	35229000	6784200	56961000	30789000	60363000	108970000	30625000	25508000	0	179760000	132170000	8195100	24070000	0	96856000	8215800	49120000	60591000	52055000	6744600	20319000	75199000	41736000
60S ribosomal protein L35a	RPL35A	33707000	9503000	33904000	0	0	0	9112200	0	0	0	6776700	0	0	0	0	0	22638000	18764000	25697000	24153000	18820000	24474000	24099000	24922000
Putative 60S ribosomal protein L13a protein RPL13AP3;60S ribosomal protein L13a	RPL13AP3;RPL13A	0	0	7164600	0	0	0	0	0	0	0	0	0	0	0	0	0	9906400	27363000	26495000	19576000	10618000	26910000	36641000	17596000
Histone-binding protein RBBP4	RBBP4	0	15489000	63904000	27668000	11050000	13859000	19565000	54353000	0	0	172650000	52732000	4376000	0	39471000	90359000	0	16719000	16840000	15375000	0	30464000	21768000	23333000
Heterogeneous nuclear ribonucleoprotein H2;Heterogeneous nuclear ribonucleoprotein H2, N-terminally processed	HNRNPH2	0	14068000	17076000	25673000	0	6127700	0	0	0	0	26542000	19104000	0	7705200	0	16331000	0	44068000	30273000	22571000	0	31973000	39137000	27912000
TOM1-like protein 2	TOM1L2	0	13364000	0	9209700	0	13335000	7875500	9071000	0	0	9258500	5358800	0	13413000	0	24287000	0	37544000	42047000	49491000	2302300	33075000	57070000	23897000
T-complex protein 1 subunit zeta	CCT6A	0	0	68930000	0	0	17215000	10932000	17767000	7906900	0	16785000	27377000	0	0	3562900	20774000	11397000	67793000	68732000	65004000	8508400	39719000	79398000	34834000
Target of Myb protein 1	TOM1	0	0	18905000	27510000	0	0	25277000	34469000	0	0	18818000	0	0	53692000	24643000	22405000	21384000	92031000	61989000	76432000	28811000	71459000	88517000	74768000
Histone H2A type 2-C;Histone H2A type 2-A	HIST2H2AC;HIST2H2AA3	5068000	242660000	28175000	34114000	14196000	39819000	84567000	67813000	21074000	4920800	0	43003000	0	39569000	0	0	57095000	82681000	65554000	125530000	36036000	75451000	149900000	66518000
Protein diaphanous homolog 3	DIAPH3	75667000	253540000	127010000	0	0	0	54352000	12603000	0	0	211520000	10284000	0	0	0	104350000	123150000	86670000	200270000	173810000	184390000	78982000	203060000	110130000
60S ribosomal protein L7	RPL7	1554800	28846000	46922000	7416400	48727000	43676000	10152000	9854300	3614700	6295900	9644600	45531000	119870000	18933000	5071400	0	83806000	133270000	142820000	103040000	104540000	137340000	163170000	121450000
60S ribosomal protein L18	RPL18	0	0	8421200	0	0	0	7608900	0	10987000	2909800	6849100	0	62792000	20388000	0	0	61582000	142770000	65714000	45578000	49160000	178740000	119040000	64535000
Calreticulin	CALR	0	0	0	0	0	2180000	0	0	0	0	0	0	0	0	0	0	0	0	4586300	0	0	0	15524000	0
NAD(P)H dehydrogenase [quinone] 1	NQO1	0	2825700	0	0	9116200	0	0	0	8362100	0	0	0	0	0	0	0	0	1619400	3552000	1626800	0	1738400	5792500	1804900
26S protease regulatory subunit 7	PSMC2	3802500	0	0	0	9574900	12774000	0	0	0	0	0	0	0	12182000	0	0	0	0	6937200	1116400	0	2048300	9759000	4668200
Ubiquitin thioesterase OTUB1	OTUB1	0	0	0	0	0	0	0	9182600	0	0	0	30298000	0	0	0	0	0	2292500	2921700	0	1317200	2260100	4012500	2814500
Eukaryotic translation initiation factor 2 subunit 2	EIF2S2	0	0	0	0	0	0	0	0	0	0	0	0	0	0	0	0	0	4753400	10266000	6803000	0	5655700	7305300	0
Protein disulfide-isomerase A3	PDIA3	6893400	58232000	59391000	13513000	0	51858000	53736000	16653000	0	0	0	6429600	0	0	0	0	0	0	8339800	5684500	2441000	5824300	13433000	1842900
DnaJ homolog subfamily B member 6;DnaJ homolog subfamily B member 3;DnaJ homolog subfamily B member 8;DnaJ homolog subfamily B member 2	DNAJB6;DNAJB3;DNAJB8;DNAJB2	0	0	0	0	0	0	0	0	6304900	0	0	0	0	0	0	0	0	2666800	8547400	6791800	958860	7075500	9747800	1733000
Probable ATP-dependent RNA helicase DDX17;Probable ATP-dependent RNA helicase DDX5	DDX17;DDX5	0	14115000	0	7474800	14649000	21287000	25169000	9404100	21937000	0	12711000	25123000	46146000	0	0	30836000	8708100	9919300	15035000	10425000	7067800	8646200	14982000	11254000
Methyl-CpG-binding domain protein 2	MBD2	0	0	0	0	0	21307000	0	0	0	0	0	9996400	0	18990000	0	8170400	4548900	12106000	18347000	14961000	0	12679000	20960000	16280000
WD repeat-containing protein 26	WDR26	0	59511000	0	20596000	0	55082000	40393000	43275000	9053200	0	59100000	36149000	11393000	16945000	14755000	17261000	0	10374000	21148000	10253000	0	18946000	26293000	22390000
T-complex protein 1 subunit eta	CCT7	3309300	43198000	43328000	102440000	10206000	63148000	111210000	160000000	7841200	10893000	258580000	201510000	0	0	19611000	57008000	3598700	45278000	56788000	43944000	6857000	31966000	67156000	42474000
Olfactory receptor 51B4	OR51B4	63810000	45097000	38494000	61737000	163650000	0	120840000	83238000	109330000	0	82560000	86445000	103610000	60358000	18578000	58407000	0	33415000	59383000	48901000	15020000	34364000	63663000	51228000
MOB kinase activator 2	MOB2	85185000	164710000	104120000	75751000	161490000	88948000	80857000	80174000	163330000	0	144340000	120210000	0	111890000	32478000	134990000	0	48209000	84096000	41160000	15907000	47566000	64919000	44189000
U4/U6 small nuclear ribonucleoprotein Prp31	PRPF31	0	24709000	58277000	8115700	16638000	49524000	33282000	12691000	24598000	22268000	19246000	17105000	0	36025000	26596000	20344000	9715500	35502000	63726000	45676000	16813000	50966000	35503000	35458000
T-complex protein 1 subunit alpha	TCP1	22377000	21300000	51621000	108720000	32701000	134690000	80614000	84386000	16736000	964280	226100000	188280000	26021000	11903000	7789100	42204000	27435000	81351000	145370000	109550000	30870000	66340000	109050000	93232000
Eukaryotic translation initiation factor 4B	EIF4B	105250000	166100000	169530000	20645000	120580000	106940000	37872000	12690000	234660000	64895000	85834000	66014000	185440000	49908000	33886000	77901000	59609000	85419000	128790000	62595000	77737000	102110000	146360000	93290000
Histone-binding protein RBBP7	RBBP7	117370000	329020000	274190000	252080000	149920000	415020000	205490000	209890000	190220000	44998000	582670000	574710000	22703000	194720000	220980000	247140000	33909000	194240000	264020000	173540000	38634000	163460000	268680000	178700000
Ig kappa chain V-IV region Len;Ig kappa chain V-IV region;Ig kappa chain V-IV region JI;Ig kappa chain V-IV region B17	IGKV4-1	51969000	210010000	120680000	112070000	729410000	281070000	111340000	128340000	194160000	43963000	229060000	302650000	181970000	107420000	33070000	234940000	77325000	175990000	287520000	240600000	154990000	169840000	301520000	190750000
Thyroid hormone receptor-associated protein 3	THRAP3	648530	392670000	309410000	190010000	13673000	385220000	299210000	274590000	29035000	46651000	1066000000	597460000	160870000	208120000	268730000	352820000	90968000	149620000	179650000	149370000	88712000	186970000	267500000	171470000
ADP/ATP translocase 2;ADP/ATP translocase 2, N-terminally processed	SLC25A5	298610000	396880000	511560000	268120000	288650000	430700000	426660000	215000000	504000000	78027000	552450000	313860000	499860000	192490000	95623000	235220000	251820000	298570000	424920000	348600000	266040000	259020000	391810000	334200000
26S proteasome non-ATPase regulatory subunit 6	PSMD6	0	0	0	0	0	0	7615000	0	13189000	0	4789700	5879500	0	0	0	0	0	0	0	0	0	0	0	0
Elongation factor 1-delta	EEF1D	0	0	0	2928200	0	0	9114300	7603600	0	2317700	0	6747100	0	0	0	0	0	0	0	0	0	0	0	0
Isocitrate dehydrogenase [NADP] cytoplasmic	IDH1	0	0	0	0	0	0	0	0	2468300	0	0	0	0	0	6404300	0	0	0	0	0	0	0	0	0
Junction plakoglobin	JUP	0	0	0	0	0	0	0	0	0	10539000	0	0	0	0	8456200	0	0	0	0	0	0	0	0	0
Putative ciliary rootlet coiled-coil protein-like 3 protein		13126000	0	15388000	31922000	0	0	36365000	28392000	0	0	33110000	48935000	39105000	0	31008000	49234000	0	0	0	0	0	0	0	0
Ig gamma-1 chain C region;Ig gamma-4 chain C region;Ig gamma-3 chain C region	IGHG1;IGHG4;IGHG3	0	10570000	0	0	0	0	0	0	0	0	0	0	0	0	154060000	0	0	0	0	0	0	0	0	0
Alpha-1-antichymotrypsin;Alpha-1-antichymotrypsin His-Pro-less	SERPINA3	0	0	0	0	0	0	0	0	0	0	0	0	0	0	82930000	0	0	0	0	0	0	0	0	2810800
Alpha-2-macroglobulin	A2M	0	0	0	0	0	0	0	0	0	0	0	0	0	0	223970000	0	0	0	0	0	0	0	0	6210600
Putative oxidoreductase GLYR1	GLYR1	0	0	0	14985000	0	26311000	0	14357000	0	0	14723000	29897000	0	23211000	0	14026000	1104500	0	1948400	1703300	0	0	1879900	1240300
Alpha-actinin-1	ACTN1	0	0	0	4892900	0	11091000	26465000	7215700	7181600	3800000	0	0	47505000	206970000	20905000	41620000	7547400	0	0	814970	6273200	0	2671000	6459300
Putative pre-mRNA-splicing factor ATP-dependent RNA helicase DHX15	DHX15	0	0	0	0	0	0	0	0	0	0	0	0	0	0	0	0	0	0	0	0	0	0	2744000	0
Protein odr-4 homolog	ODR4	0	0	0	0	0	0	0	0	0	0	0	0	0	0	0	0	1301700	0	0	3760900	0	0	3861700	2134800
Splicing factor U2AF 26 kDa subunit;Splicing factor U2AF 35 kDa subunit	U2AF1L4;U2AF1	0	0	0	0	8835100	0	0	0	5359800	0	0	0	0	0	0	0	2329600	2779300	0	0	0	0	5616300	3995100
GTP-binding nuclear protein Ran	RAN	0	0	0	0	12856000	11816000	6205000	6393200	0	0	0	0	0	1686700	0	0	2235400	0	0	0	0	0	6214800	3930100
Calmodulin-like protein 5	CALML5	0	0	0	0	0	0	0	0	0	0	0	0	0	0	0	0	0	0	0	0	0	0	6784200	0
Complement C3;Complement C3 beta chain;C3-beta-c;Complement C3 alpha chain;C3a anaphylatoxin;Acylation stimulating protein;Complement C3b alpha chain;Complement C3c alpha chain fragment 1;Complement C3dg fragment;Complement C3g fragment;Complement C3d fragment;Complement C3f fragment;Complement C3c alpha chain fragment 2	C3	11344000	32370000	0	0	21270000	37468000	15120000	1130200	18202000	0	13714000	16174000	18277000	0	95292000	0	4151800	5164800	5934500	4404400	0	0	6943400	5024600
Tropomyosin alpha-1 chain	TPM1	0	0	0	0	0	0	0	0	0	0	29984000	0	0	0	43563000	59636000	20910000	1916400	3970900	2539200	30274000	0	7682200	0
Cleavage and polyadenylation specificity factor subunit 5	NUDT21	0	0	0	0	0	0	0	0	0	0	0	0	0	0	0	0	7275100	5947300	6446300	4830600	0	0	7851200	4242900
40S ribosomal protein S13	RPS13	0	0	0	0	0	0	0	9702500	0	0	0	0	0	0	0	0	0	5093300	5039700	0	0	0	8665500	5183700
Moesin;Radixin;Ezrin	MSN;RDX;EZR	0	0	0	0	0	0	11870000	0	0	0	0	0	0	0	0	0	5762300	0	4449500	4549900	4126100	0	10799000	2970300
Malate dehydrogenase, mitochondrial	MDH2	0	0	0	0	0	0	0	0	0	0	0	0	0	0	0	0	9972700	1122000	13462000	8313100	0	0	20188000	6993400
Stress-induced-phosphoprotein 1	STIP1	0	0	0	0	0	0	15960000	8528800	0	0	0	11872000	0	0	0	0	2751200	2685300	7673600	10703000	523430	0	26752000	7094800
14-3-3 protein gamma;14-3-3 protein gamma, N-terminally processed	YWHAG	11404000	10247000	0	0	21177000	0	7477800	0	17054000	7221300	4182100	0	12689000	9455100	2628000	0	0	2112200	0	2111000	0	1507700	9168600	5289900
40S ribosomal protein S18	RPS18	4276600	14917000	0	0	35555000	23510000	0	0	0	0	0	0	0	0	0	0	8758000	5756000	10581000	7096100	0	1818700	13124000	6566600
40S ribosomal protein S15a	RPS15A	0	0	0	0	9886900	0	0	0	7392100	0	0	0	0	0	0	0	1815400	3069400	3206900	5418300	0	2112000	10218000	3796200
Constitutive coactivator of PPAR-gamma-like protein 1;Putative uncharacterized protein C9orf129	FAM120A;C9orf129	0	0	13748000	0	0	6957000	7093400	5910200	3962800	0	2731600	4634500	0	10042000	18344000	0	1170600	3065400	1914500	2708000	1682300	2728000	0	3827100
Far upstream element-binding protein 2	KHSRP	0	0	0	0	0	0	0	0	0	0	0	0	0	0	0	0	2471100	0	3696400	3739800	0	2808000	5148100	2671200
26S proteasome non-ATPase regulatory subunit 1	PSMD1	0	0	0	0	4622000	0	0	0	0	0	0	0	0	0	0	0	0	0	0	0	0	3320100	6542000	0
SLAIN motif-containing protein 2	SLAIN2	3866400	0	0	0	0	6855600	0	7763300	11235000	0	0	0	0	0	0	0	2512700	4548800	4644200	0	2869400	3486800	5926200	4077100
Eukaryotic translation initiation factor 3 subunit F	EIF3F	0	7088600	0	3750100	0	0	5720400	3912200	13146000	9016900	0	5028100	22311000	7026000	0	0	8748000	4379400	3695800	5949300	9517100	3684300	5885600	2128000
TAR DNA-binding protein 43	TARDBP	0	10724000	0	0	10847000	8973200	0	0	6369400	0	0	0	0	0	0	0	544810	0	1165100	0	0	3697300	5426200	0
Protein arginine N-methyltransferase 1	PRMT1	0	0	0	0	0	0	10631000	0	0	0	0	6417500	0	0	0	0	8156500	0	0	0	2998400	4169600	0	0
40S ribosomal protein S14	RPS14	6895500	0	0	0	41027000	3508500	21255000	0	0	0	4620900	6540700	0	0	0	0	7695500	8696300	0	3425800	2439800	4287800	9331900	4962100
40S ribosomal protein S11	RPS11	0	0	0	0	0	0	0	0	0	0	0	0	0	0	0	0	3556800	5448700	4501900	4143500	1758400	4522900	9140500	5939200
Polymerase I and transcript release factor	PTRF	0	0	0	0	0	0	0	0	0	0	7433200	0	0	0	0	0	2976300	3686300	3411400	4116600	7269000	4995300	3939200	4509200
Cullin-associated NEDD8-dissociated protein 1	CAND1	2529200	0	9461900	0	9773900	11147000	16697000	0	9156800	0	0	0	9940500	0	0	0	2647500	13022000	8396800	5182600	6547300	5026900	11255000	11478000
Protein transport protein Sec61 subunit alpha isoform 2;Protein transport protein Sec61 subunit alpha isoform 1	SEC61A2;SEC61A1	0	0	0	0	0	0	0	0	0	0	0	0	0	0	0	0	0	3394600	4652400	5522600	0	5123600	7415400	5123700
40S ribosomal protein S20	RPS20	0	31810000	0	0	19213000	8758400	7853200	6309500	20225000	0	0	0	0	0	0	0	13488000	4879400	8765500	7311700	3935500	5195700	15181000	7250600
Reticulon-3	RTN3	0	0	0	0	0	7822200	0	0	0	0	0	0	0	0	0	0	3057200	0	7604300	5601000	4229400	5396100	11755000	6700900
Cytosolic purine 5-nucleotidase	NT5C2	0	0	0	0	0	0	0	0	0	0	0	0	0	0	0	0	4915600	10076000	10854000	4620100	3334500	5587800	9805800	6897900
Serpin H1	SERPINH1	0	0	0	23040000	0	0	0	11461000	0	0	0	0	11336000	0	0	0	0	8587500	7544200	6488800	3588700	5879500	16077000	6119400
Transitional endoplasmic reticulum ATPase	VCP	0	0	0	0	18325000	0	0	0	12295000	11670000	6666600	8746500	0	0	0	0	8101500	3869100	9060200	4805700	5370900	6522400	16204000	8747000
Transcriptional repressor p66-beta	GATAD2B	0	0	0	0	0	15338000	0	0	0	0	13503000	0	0	0	0	0	0	4841000	5027800	449720	0	8549400	4786600	5907500
60S ribosomal protein L22	RPL22	5256200	0	0	0	18188000	15730000	8208100	10503000	17116000	0	0	0	0	0	0	0	5888300	5656200	11696000	11742000	2012700	8869800	21613000	12288000
Dynein light chain 1, cytoplasmic;Dynein light chain 2, cytoplasmic	DYNLL1;DYNLL2	21681000	11241000	15619000	0	47439000	17108000	0	0	8084600	0	0	0	0	0	0	0	7546600	9089300	10888000	15747000	5406900	9363600	23571000	13839000
Importin subunit alpha-3	KPNA4	0	0	5850800	0	0	0	0	2274800	0	0	0	3405100	0	0	0	2792600	918010	8848800	10024000	7493100	1672300	9420000	8755200	10073000
40S ribosomal protein S16	RPS16	21651000	0	9213800	16169000	61833000	0	25914000	15090000	12550000	14327000	0	23218000	13968000	13263000	0	18069000	23700000	12057000	12111000	19414000	10639000	11672000	31238000	15193000
NADH-cytochrome b5 reductase 3;NADH-cytochrome b5 reductase 3 membrane-bound form;NADH-cytochrome b5 reductase 3 soluble form	CYB5R3	26428000	41733000	0	14424000	52282000	34639000	62887000	29388000	29906000	0	11014000	0	25613000	0	17108000	0	18122000	14280000	12079000	10581000	0	11786000	16179000	9712900
Tubulin beta-8 chain	TUBB8	0	0	0	0	0	0	0	0	0	0	0	0	0	0	0	0	18674000	21130000	0	18233000	0	12984000	28429000	14332000
Galectin-1	LGALS1	24293000	0	13150000	25104000	0	0	105830000	63350000	0	6709900	60836000	68498000	16243000	29317000	27356000	42513000	36502000	17885000	40117000	38844000	16376000	13957000	76505000	34866000
3-hydroxyanthranilate 3,4-dioxygenase	HAAO	0	0	145800000	0	542370000	544660000	205820000	0	0	4048500	358000000	0	0	276400000	650120000	397460000	165950000	25784000	26805000	24351000	261380000	14154000	25180000	24721000
C-Myc-binding protein	MYCBP	11162000	34302000	17787000	0	0	13989000	11455000	43740000	0	0	5827100	15454000	0	0	0	21995000	4580500	10194000	4165100	15343000	0	15297000	18406000	15571000
Nuclease-sensitive element-binding protein 1	YBX1	17357000	3788000	0	0	2437900	13471000	47021000	1500700	34985000	0	21381000	0	0	0	0	0	24346000	20528000	18518000	14789000	31643000	17324000	39908000	20801000
Reticulocalbin-2	RCN2	44336000	60424000	46314000	7194300	28379000	27400000	25054000	6180400	26848000	0	20190000	0	0	0	11647000	6516700	46088000	23535000	41504000	28820000	68306000	18312000	46208000	28896000
Olfactory receptor 2B11	OR2B11	0	38475000	0	0	0	0	0	0	0	2419800	26870000	0	0	0	0	0	6199200	15321000	21395000	20282000	7215100	18892000	23007000	16134000
60S ribosomal protein L17	RPL17	15493000	12686000	17316000	0	25258000	0	41987000	20656000	20686000	4848300	12510000	15497000	16179000	10092000	11773000	0	34518000	25434000	23742000	22118000	17582000	23002000	34535000	19675000
60S ribosomal protein L27a	RPL27A	0	37536000	0	14383000	75937000	62258000	18312000	16814000	33488000	0	10566000	19099000	0	0	0	0	21467000	36801000	25862000	25329000	17923000	25431000	45243000	28916000
60S ribosomal protein L18a	RPL18A	39731000	61817000	0	6506700	144490000	24967000	0	0	108330000	8740900	0	0	40087000	8002300	11793000	0	0	39951000	63998000	65494000	15848000	25434000	82581000	61487000
60S ribosomal protein L10;60S ribosomal protein L10-like	RPL10;RPL10L	10224000	0	7605600	0	16047000	3170000	6516500	0	0	0	13300000	22763000	0	0	0	0	24623000	13137000	20670000	24113000	9823000	28549000	39602000	24857000
Melanoma inhibitory activity protein 3	MIA3	0	0	0	0	0	0	65219000	36626000	0	0	30987000	34306000	0	0	0	7548600	20124000	30969000	39051000	35053000	25552000	29513000	51375000	51552000
Vimentin	VIM	0	34960000	0	10764000	0	0	0	0	0	0	0	13888000	0	42686000	8263100	11665000	20677000	45252000	45314000	53765000	17324000	30137000	96239000	21040000
Stress-70 protein, mitochondrial	HSPA9	44637000	127230000	0	45671000	157230000	120560000	77679000	55947000	170750000	944820	33528000	57971000	110510000	5648700	9458900	60267000	33739000	36146000	40854000	31140000	24114000	30229000	44756000	37495000
Myosin phosphatase Rho-interacting protein	MPRIP	28249000	54046000	2108800	0	41022000	13046000	21914000	5642100	27908000	0	26419000	0	0	0	60857000	74577000	56635000	21626000	18997000	15927000	105090000	30286000	28543000	8503000
Calnexin	CANX	45789000	95383000	18103000	41340000	62144000	71511000	65537000	74585000	73155000	93363000	100240000	72081000	48886000	60391000	34973000	46162000	41003000	38370000	41227000	44358000	30404000	32970000	59798000	48729000
26S protease regulatory subunit 6B	PSMC4	4836400	10175000	0	28514000	22732000	41564000	40460000	8333600	16028000	0	40127000	0	0	6473400	8718200	8058600	46666000	28533000	36770000	25091000	14385000	34457000	41766000	36873000
Lysine-specific histone demethylase 1A	KDM1A	0	9180500	0	44421000	0	5910100	15910000	53563000	0	0	62227000	47130000	0	0	0	0	0	37734000	24469000	26298000	0	35483000	33135000	31405000
Ig kappa chain V-I region Lay;Ig kappa chain V-III region POM;Ig kappa chain V-III region VH;Ig kappa chain V-III region CLL		8121500	76063000	60288000	25115000	25124000	13283000	33986000	35113000	0	0	19112000	14114000	30564000	12079000	0	0	66467000	65310000	59794000	59902000	59695000	50560000	66008000	75634000
Histone H2B type 1-L;Histone H2B type 1-M;Histone H2B type 1-N;Histone H2B type 1-H;Histone H2B type 2-F;Histone H2B type 1-C/E/F/G/I;Histone H2B type 1-D;Histone H2B type F-S;Histone H2B type 1-K;Histone H2B type 3-B;Histone H2B type 2-E;Histone H2B type 1-B;Histone H2B type 1-O;Histone H2B type 1-J;Histone H2B type 1-A	HIST1H2BL;HIST1H2BM;HIST1H2BN;HIST1H2BH;HIST2H2BF;HIST1H2BC;HIST1H2BD;H2BFS;HIST1H2BK;HIST3H2BB;HIST2H2BE;HIST1H2BB;HIST1H2BO;HIST1H2BJ;HIST1H2BA	11416000	195710000	151590	62792000	22345000	127430000	69253000	88474000	23009000	1285200	0	16464000	52571000	73703000	12070000	0	47596000	78687000	63131000	85509000	25798000	57480000	145390000	58763000
Importin subunit beta-1	KPNB1	19462000	122120000	181240000	60655000	73223000	171420000	90554000	66246000	92538000	37900000	26002000	33566000	158480000	138960000	53806000	35742000	67594000	65520000	68815000	44510000	75247000	58464000	66202000	61100000
60S ribosomal protein L30	RPL30	110900000	47647000	0	65792000	249470000	36168000	65835000	46686000	199080000	4511800	55982000	74687000	0	36730000	19176000	44505000	92525000	120390000	75185000	108200000	53007000	60914000	93477000	82957000
Alpha-actinin-4	ACTN4	26209000	160820000	0	77123000	46763000	117670000	108870000	55129000	29943000	2506600	0	0	739590000	1145700000	270610000	616240000	69868000	49239000	65471000	39294000	38916000	62245000	121340000	50938000
60S ribosomal protein L15	RPL15	13848000	0	15396000	4539700	65430000	0	8992400	5072500	63317000	0	37673000	0	66716000	19722000	0	5532900	90053000	92823000	67893000	72958000	67454000	67753000	84312000	64633000
Actin-related protein 2/3 complex subunit 5-like protein	ARPC5L	0	120590000	33564000	83004000	47421000	125380000	109500000	103860000	0	0	22127000	37657000	75975000	20010000	29419000	24741000	60859000	99996000	124740000	153890000	55609000	78678000	159690000	118860000
Actin-related protein 2/3 complex subunit 5	ARPC5	0	189510000	79610000	85053000	0	0	0	72473000	0	0	715780	11251000	0	0	0	43906000	169730000	71261000	79651000	124320000	64198000	94752000	138690000	113610000
Tyrosine-protein kinase JAK1	JAK1	29699000	56374000	47323000	62045000	96774000	120190000	23020000	39525000	111950000	14695000	89520000	63896000	21655000	36037000	43462000	37564000	24099000	118360000	113360000	123320000	74835000	99919000	118440000	102130000
60S ribosomal protein L27	RPL27	66028000	108120000	60334000	19678000	138820000	87160000	76898000	14126000	145350000	0	14316000	22654000	61417000	14218000	0	0	100460000	89021000	106570000	101220000	79102000	100250000	144930000	127770000
26S proteasome non-ATPase regulatory subunit 4	PSMD4	77886000	233050000	89340000	190030000	191080000	164560000	21175000	178980000	174550000	0	210970000	210490000	0	93623000	41830000	284080000	29142000	112140000	103570000	94306000	23088000	100430000	151030000	92151000
Myosin light chain 1/3, skeletal muscle isoform;Myosin light chain 3	MYL1;MYL3	99770000	62193000	94035000	21360000	0	0	150920000	50968000	0	0	0	5668900	0	3534600	0	20611000	614960000	98235000	84342000	73607000	311980000	102330000	96851000	70941000
Histone H4	HIST1H4A	11337000	316180000	145560000	98284000	18165000	164620000	230900000	203920000	11158000	0	111760000	106350000	66112000	139670000	27367000	61986000	88234000	147530000	120280000	147470000	56933000	116470000	207980000	91773000
Destrin	DSTN	231610000	166700000	54166000	67754000	391800000	192610000	48264000	88253000	259370000	9730000	176840000	141040000	147220000	87513000	0	88915000	1798000	243140000	148080000	122260000	35062000	170480000	269370000	203920000
Metastasis-associated protein MTA2	MTA2	11788000	281220000	409970000	261000000	58952000	494990000	475340000	280080000	60160000	0	956460000	520900000	25462000	61669000	98056000	164570000	19599000	229620000	247980000	222370000	19875000	206180000	294400000	270740000
Triosephosphate isomerase	TPI1	256140000	629740000	108760000	426940000	1056600000	577590000	552000000	401250000	558920000	461830000	493170000	569460000	551120000	682930000	252010000	355580000	211570000	250100000	287370000	253850000	162220000	217620000	390550000	258340000
Enhancer of rudimentary homolog	ERH	96646000	720830000	564240000	420920000	169700000	977420000	438380000	284090000	214290000	377430000	645320000	682350000	275540000	372840000	727830000	390220000	205370000	291170000	278320000	351690000	104150000	328260000	470960000	372390000
Tubulin beta chain	TUBB	366940000	404850000	110820000	264420000	546160000	483210000	265640000	262490000	460110000	90302000	215400000	219330000	305890000	270700000	87059000	187490000	421060000	308480000	534940000	483150000	337860000	346770000	545560000	459290000
Annexin A1	ANXA1	376320000	1564200000	436770000	635930000	1255900000	1603600000	1011400000	669090000	862910000	383860000	460190000	619900000	781900000	573820000	231400000	600120000	125330000	478690000	668810000	572900000	172440000	401320000	894600000	581140000
Actin-related protein 2/3 complex subunit 4	ARPC4	164240000	1650200000	385750000	608850000	446570000	1195400000	749390000	765860000	393950000	69888000	415670000	455880000	1311300000	781420000	240220000	872460000	525820000	574750000	739050000	950780000	466450000	572540000	836810000	708820000
Unconventional myosin-VI	MYO6	87495000	1995100000	543420000	940100000	314220000	741990000	808790000	754320000	130660000	0	323650000	159390000	354890000	1589700000	381020000	660420000	594100000	999490000	931580000	1049200000	686470000	809520000	960780000	697990000
Tropomodulin-3	TMOD3	4964400000	12974000000	4755800000	5831800000	11872000000	8815600000	6135400000	6803400000	10424000000	3958300000	4345100000	5283400000	8897200000	5565600000	3246400000	5125300000	3553600000	6308500000	4352300000	5453400000	4506100000	5474300000	6817200000	5992600000
Vacuolar protein sorting-associated protein 33B	VPS33B	20054000	35166000	0	16970000	34447000	28097000	32602000	16308000	70240000	0	27523000	0	98232000	37263000	26372000	0	6392000	10156000	26233000	7068600	6743400	0	0	12549000
Unconventional myosin-IXb	MYO9B	8917100	59884000	18228000	3556600	34874000	67654000	60925000	24357000	36466000	0	32466000	16595000	0	0	0	0	0	0	1098300	0	0	839870	0	2549300
26S protease regulatory subunit 8	PSMC5	11100000	0	11912000	9999300	20421000	0	5324300	4945600	7264900	0	1538000	2809200	0	0	0	0	413170	6855400	8842000	6880400	5341400	2141400	13619000	5346900
Dedicator of cytokinesis protein 4	DOCK4	5072800	30739000	0	25272000	102350000	31654000	0	25999000	60992000	26365000	30075000	34506000	38554000	28953000	0	10518000	10334000	10377000	21455000	13350000	3650400	3214400	3229700	8193600
Dedicator of cytokinesis protein 8	DOCK8	0	0	0	0	0	0	0	0	0	0	0	0	0	0	0	0	0	4571000	5655800	4755200	5176100	4934500	0	6980800
Proliferating cell nuclear antigen	PCNA	12992000	0	0	0	0	0	0	0	0	0	0	0	0	0	0	0	2258500	3224000	8978800	4184300	5334400	5120300	13455000	6952500
Monofunctional C1-tetrahydrofolate synthase, mitochondrial	MTHFD1L	9602500	24579000	8082400	14380000	37526000	19635000	13255000	9570800	42851000	0	17461000	7869200	20655000	4936800	0	0	0	6473200	8871000	1385200	5987800	5318500	11342000	5938000
Dolichol-phosphate mannosyltransferase subunit 1	DPM1	155750000	122060000	0	0	228350000	116120000	60565000	0	324310000	3708400	0	0	352780000	0	30731000	0	15012000	36198000	65401000	35481000	24826000	11179000	29468000	25881000
60S ribosomal protein L11	RPL11	20724000	31164000	0	22769000	70957000	28340000	0	0	58082000	0	0	0	44960000	0	0	0	13079000	16295000	24595000	17378000	13745000	12485000	26272000	20962000
Elongation factor Tu, mitochondrial	TUFM	0	5776700	0	30340000	0	6648200	5494900	30680000	7584000	0	23935000	10651000	0	28538000	0	0	1752500	4817000	15126000	8194800	1209600	13831000	9134300	8205000
Fibrinogen gamma chain	FGG	0	128600000	12574000	15007000	60211000	146030000	21848000	9351500	114050000	4384800	35910000	40301000	32737000	24156000	66388000	19381000	7828000	21496000	28723000	24122000	19943000	24220000	14374000	17467000
60S ribosomal protein L8	RPL8	91794000	54439000	64534000	0	131170000	55985000	63847000	0	243680000	34257000	56912000	9558500	54145000	43914000	41664000	15502000	62874000	69462000	112750000	62703000	120530000	68180000	86340000	64091000
Bcl-2-associated transcription factor 1	BCLAF1	0	181410000	101190000	145740000	0	123970000	28864000	125320000	30692000	35374000	154270000	189390000	21612000	100530000	27961000	57160000	9579700	42903000	89015000	68606000	11880000	88926000	102890000	97051000
Myosin-14	MYH14	62916000	706280000	228430000	199950000	248580000	728270000	179050000	177300000	149750000	60828000	63875000	126410000	0	384570000	0	148400000	37667000	120020000	249820000	36727000	984090000	116040000	213710000	148150000
Protein phosphatase 1B	PPM1B	0	7355200	6212000	23873000	10524000	22368000	0	22669000	0	6105600	44812000	23035000	24925000	11345000	0	27977000	42718000	117500000	139670000	91616000	44365000	121870000	138830000	112880000
Methylosome protein 50	WDR77	2008900000	2067300000	1251800000	1682300000	2670300000	3083900000	1839000000	1764300000	2661500000	565710000	2255400000	2107600000	3317700000	2094800000	1239400000	1914100000	759200000	849350000	1330700000	475550000	850760000	731470000	1386300000	537010000
26S proteasome non-ATPase regulatory subunit 11	PSMD11	0	0	0	0	0	0	0	0	0	0	0	0	0	0	0	0	0	0	0	0	0	0	0	0
Histone H2A type 1-J;Histone H2A type 1-H;Histone H2A.J;Histone H2A type 1-C;Histone H2A type 3;Histone H2A type 1-D;Histone H2A type 1;Histone H2A type 1-B/E;Histone H2A type 2-B;Histone H2AX	HIST1H2AJ;HIST1H2AH;H2AFJ;HIST1H2AC;HIST3H2A;HIST1H2AD;HIST1H2AG;HIST1H2AB;HIST2H2AB;H2AFX	0	0	0	0	0	0	0	0	0	0	0	0	0	0	0	0	0	0	0	0	0	0	0	0
Electron transfer flavoprotein subunit alpha, mitochondrial	ETFA	0	0	0	0	0	0	0	0	0	0	0	0	0	0	0	0	0	0	0	0	0	0	0	0
Ras-related protein Rab-7a	RAB7A	0	0	0	0	0	0	0	0	0	0	0	0	0	0	0	0	0	0	0	0	0	0	0	0
Spectrin beta chain, non-erythrocytic 1	SPTBN1	0	0	0	0	0	0	0	0	0	0	0	0	0	0	0	0	0	0	0	0	0	0	0	0
Plectin	PLEC	0	0	0	0	0	0	0	0	0	0	0	0	0	0	0	0	0	0	0	0	0	0	0	0
MOB kinase activator 1A;MOB kinase activator 1B	MOB1A;MOB1B	0	0	0	0	0	0	0	0	0	0	0	0	0	0	0	0	0	0	0	0	0	0	0	0
E3 ubiquitin-protein ligase RNF5	RNF5	0	0	0	0	0	0	0	0	0	0	0	0	0	0	0	0	0	0	0	0	0	0	0	0
Histone deacetylase complex subunit SAP130	SAP130	0	0	0	0	0	0	0	0	0	0	0	0	0	0	0	0	0	0	0	0	0	0	0	0
26S proteasome non-ATPase regulatory subunit 13	PSMD13	0	0	0	0	0	0	0	0	0	0	0	0	0	0	0	0	0	0	0	0	0	0	0	0
Phospholipase A-2-activating protein	PLAA	0	0	0	0	0	0	0	0	1880900	0	0	0	0	0	0	0	0	0	0	0	0	0	0	0
FERM, RhoGEF and pleckstrin domain-containing protein 1	FARP1	0	0	0	0	20310000	0	0	0	10543000	0	0	0	0	0	0	0	0	0	0	0	0	0	0	0
Caveolin-1	CAV1	14274000	0	0	0	0	0	0	0	0	0	0	0	0	0	0	0	8317400	0	0	0	11851000	0	0	0
Gem-associated protein 2	GEMIN2	18813000	0	9359500	4563300	23933000	0	17447000	0	0	0	0	0	0	0	0	0	0	0	0	0	0	0	0	0
14-3-3 protein beta/alpha;14-3-3 protein beta/alpha, N-terminally processed	YWHAB	1790700	0	0	0	8131700	2556500	5930400	0	0	0	0	0	0	0	0	0	824640	0	0	0	525420	0	0	0
Chloride intracellular channel protein 1	CLIC1	0	0	0	0	17284000	4830000	8662200	0	12432000	0	0	0	20699000	0	0	0	0	0	0	0	0	0	0	0
WD repeat-containing protein 61;WD repeat-containing protein 61, N-terminally processed	WDR61	0	0	0	0	0	0	0	0	0	3191500	0	0	0	0	0	0	0	0	0	0	0	0	0	0
Cullin-1	CUL1	0	4376700	0	0	0	0	0	6278300	4201000	4362900	14300000	5804000	0	0	0	0	0	0	0	0	460660	0	0	0
Complement C4-B;Complement C4 beta chain;Complement C4-B alpha chain;C4a anaphylatoxin;C4b-B;C4d-B;Complement C4 gamma chain;Complement C4-A;Complement C4 beta chain;Complement C4-A alpha chain;C4a anaphylatoxin;C4b-A;C4d-A;Complement C4 gamma chain	C4B;C4A	0	0	0	0	0	0	0	0	0	0	0	0	11197000	0	96596000	0	0	0	0	0	0	0	0	0
Ig kappa chain C region	IGKC	4720800	10586000	0	0	0	0	0	0	0	0	0	0	0	12269000	17544000	0	0	0	0	0	0	0	0	0
Calcium-regulated heat stable protein 1	CARHSP1	0	25500000	0	7671000	31272000	20336000	17595000	12269000	17602000	0	0	0	0	15223000	0	10840000	0	0	0	0	0	0	0	0
Synaptotagmin-9	SYT9	11005000	24123000	0	16202000	15708000	34201000	19436000	20867000	24407000	0	24011000	38158000	31047000	36741000	34888000	31807000	0	0	0	0	0	0	0	0
Ankyrin repeat and FYVE domain-containing protein 1	ANKFY1	0	0	0	0	0	11840000	0	0	0	0	0	0	0	41997000	0	0	0	0	0	0	3934000	0	0	0
Beta-actin-like protein 2	ACTBL2	0	0	0	0	0	257110000	0	0	0	0	0	17887000	0	50177000	0	65300000	0	0	0	0	0	0	0	0
Glycogen [starch] synthase, muscle	GYS1	30890000	6239300	0	0	158730000	9019000	0	0	213640000	0	4644200	4802500	15584000	0	0	0	19268000	0	0	26121000	3125200	0	0	0
60S ribosomal protein L37a	RPL37A	0	0	0	0	0	0	0	0	0	5318000	0	0	0	0	0	0	0	1824700	0	0	0	0	0	0
Serine/arginine-rich splicing factor 1	SRSF1	10299000	0	0	10496000	15353000	0	17659000	19580000	2857300	0	0	0	26494000	0	0	4618500	3349600	3431600	0	3512800	0	0	0	0
Transcription initiation factor TFIID subunit 12	TAF12	5579200	1395400	0	0	16561000	6389900	0	0	12980000	0	0	0	17231000	0	0	11848000	0	0	0	0	0	0	0	1017200
Brefeldin A-inhibited guanine nucleotide-exchange protein 2	ARFGEF2	0	0	0	0	0	0	0	0	0	0	0	0	0	0	0	0	0	0	0	0	0	0	0	3147000
Secretogranin-3	SCG3	0	0	0	0	0	0	0	0	0	0	0	0	0	0	0	0	0	0	0	0	0	0	0	6443500
Putative keratin-87 protein	KRT87P	0	0	0	0	0	0	0	0	0	0	0	0	0	0	0	0	0	0	0	0	0	0	0	51008000
Ig gamma-2 chain C region	IGHG2	77493000	712690000	119180000	228900000	102250000	689550000	93133000	190180000	140820000	25523000	104230000	154220000	0	61468000	150730000	301220000	108450000	0	196720000	0	209270000	0	0	125360000
Lamina-associated polypeptide 2, isoforms beta/gamma;Thymopoietin;Thymopentin;Lamina-associated polypeptide 2, isoform alpha;Thymopoietin;Thymopentin	TMPO	21792000	7676600	0	0	47493000	0	0	0	50680000	0	0	0	0	0	0	0	7369900	2184000	0	0	11118000	0	2179500	3410600
THO complex subunit 4	ALYREF	0	0	0	0	0	0	0	0	0	0	0	0	0	0	0	0	0	2228800	0	0	0	0	2574100	2366900
Cyclin-dependent-like kinase 5;Cyclin-dependent kinase 1;Cyclin-dependent kinase 2;Cyclin-dependent kinase 4;Cyclin-dependent kinase 3;Cyclin-dependent kinase 6;Cyclin-dependent kinase 9;Cyclin-dependent kinase 15;Cyclin-dependent kinase 14;Cyclin-dependent kinase 18;Cyclin-dependent kinase 16;Cyclin-dependent kinase 17;Cyclin-dependent kinase 12;Cyclin-dependent kinase 13	CDK5;CDK1;CDK2;CDK4;CDK3;CDK6;CDK9;CDK15;CDK14;CDK18;CDK16;CDK17;CDK12;CDK13	8160700	15920000	0	0	27026000	0	0	5457100	15792000	0	6960300	0	0	0	0	9417700	2972800	0	0	1632700	0	0	2616300	2522600
Ras GTPase-activating protein-binding protein 1	G3BP1	0	0	0	0	0	0	0	0	0	0	0	0	0	0	0	0	2987700	2108700	0	1300900	1364400	0	2895300	0
Exportin-2	CSE1L	0	0	0	0	0	0	0	0	0	0	0	0	0	0	0	0	3662200	0	2768600	0	2500000	0	4124000	0
Barrier-to-autointegration factor;Barrier-to-autointegration factor, N-terminally processed	BANF1	0	0	0	0	0	0	0	0	0	0	0	0	0	0	0	0	30623000	0	0	0	11468000	0	4975100	0
40S ribosomal protein S7	RPS7	0	0	0	0	6773500	0	0	0	0	3828000	0	0	0	0	0	0	11571000	1606200	3122100	0	3358800	0	5151700	0
ADP-ribosylation factor 5;ADP-ribosylation factor 1;ADP-ribosylation factor 3	ARF5;ARF1;ARF3	0	0	0	0	0	0	0	0	0	0	0	0	0	0	0	0	4626800	0	3508600	0	1949800	0	5176500	5914300
Putative heat shock protein HSP 90-beta 2	HSP90AB2P	0	0	0	0	0	0	0	0	0	0	0	0	0	0	0	0	0	0	0	3569300	4847100	0	5987400	4206900
Tubulin alpha-1C chain	TUBA1C	0	0	0	0	0	0	0	0	0	0	0	0	0	0	0	0	12182000	12275000	0	7815800	0	0	9112600	9871200
40S ribosomal protein S10	RPS10	0	0	0	0	6591200	0	5887700	0	8269900	0	0	0	0	11758000	3706600	0	0	4584000	2259000	0	6222100	0	9200000	4189700
40S ribosomal protein S12	RPS12	0	0	0	0	0	0	0	0	0	0	0	0	0	0	0	0	8034400	2506600	0	0	6009900	0	9491700	0
Fascin	FSCN1	0	11786000	0	0	18754000	25398000	0	0	12691000	0	0	0	0	0	0	0	0	2344200	6755200	5911900	6932200	0	9551900	5252000
Nascent polypeptide-associated complex subunit alpha;Nascent polypeptide-associated complex subunit alpha, muscle-specific form	NACA	0	11450000	0	0	0	0	0	0	0	0	0	0	0	0	0	0	8731400	1754900	4669800	4405900	3656500	0	9612500	9923200
Obg-like ATPase 1	OLA1	0	0	0	0	0	0	0	0	0	0	0	0	0	0	0	0	3573800	0	0	0	5535600	0	9810300	0
40S ribosomal protein S25	RPS25	8048800	15851000	0	0	34642000	11859000	2179800	2822400	31068000	0	0	0	173460000	7379500	5993400	0	9126800	0	6644500	5164500	3761200	0	12765000	6768700
Fructose-bisphosphate aldolase C	ALDOC	0	0	0	0	25172000	0	0	0	14204000	0	0	0	0	0	0	0	11478000	5940000	9533600	7405800	2962000	0	13079000	6317800
Annexin A5	ANXA5	0	0	0	0	26889000	0	23625000	0	13372000	0	0	0	0	0	0	0	6127200	1250400	4580900	2295900	1742300	0	13169000	2814700
Plastin-3	PLS3	4583200	0	0	4609700	20318000	8389600	15433000	0	24437000	0	0	0	36314000	0	0	4527800	8047000	4666200	9658500	7169000	1720000	0	13556000	0
Prelamin-A/C;Lamin-A/C	LMNA	19617000	0	0	0	0	0	0	0	52288000	0	0	0	0	0	0	0	17004000	0	3839500	0	31804000	0	14965000	0
Rho GDP-dissociation inhibitor 1	ARHGDIA	0	0	0	0	12137000	0	0	0	11896000	0	0	0	0	0	0	0	18794000	0	13018000	8626600	5398400	0	16592000	13405000
Serine/threonine-protein phosphatase PP1-gamma catalytic subunit;Serine/threonine-protein phosphatase PP1-beta catalytic subunit;Serine/threonine-protein phosphatase PP1-alpha catalytic subunit	PPP1CC;PPP1CB;PPP1CA	0	0	0	0	0	0	0	0	0	0	0	0	0	0	0	0	7291800	6786800	8841900	3672700	5207800	0	16881000	4558200
Eukaryotic translation initiation factor 5A-1;Eukaryotic translation initiation factor 5A-2;Eukaryotic translation initiation factor 5A-1-like	EIF5A;EIF5A2;EIF5AL1	0	0	0	0	52095000	0	0	0	20311000	0	0	0	25513000	13895000	0	8966400	8070900	2991500	11464000	4161100	2515600	0	18909000	12083000
Protein SET;Protein SETSIP	SET;SETSIP	2365300	0	0	0	7860400	0	7003400	0	22560000	0	0	6138900	0	0	0	0	12533000	1872600	10358000	5293000	5336000	0	22657000	10655000
Nucleosome assembly protein 1-like 1	NAP1L1	14170000	0	0	0	9239500	0	0	0	0	0	0	0	0	0	0	0	25113000	8198100	20217000	10629000	42797000	0	24770000	13956000
Protein disulfide-isomerase	P4HB	0	0	0	0	6854300	0	7978600	5293000	0	4395700	0	0	0	0	0	0	17233000	5439900	11512000	6621800	14815000	0	43660000	12717000
Gamma-enolase	ENO2	4641500	5994100	0	0	25151000	0	23247000	15902000	14995000	0	0	9513200	21506000	0	0	0	41979000	10193000	27891000	0	57499000	0	53577000	0
Ankyrin repeat domain-containing protein 26	ANKRD26	250670000	0	14193000	0	33756000	62260000	0	22526000	22839000	0	80319000	0	0	0	0	0	38804000	75065000	79789000	69240000	17126000	0	76217000	82736000
Toll-interacting protein	TOLLIP	0	69750000	2736100	26752000	0	0	0	25276000	0	0	0	18040000	0	76640000	19213000	0	8563700	61437000	3938000	1157700	13010000	680760	64442000	628660
Mitogen-activated protein kinase 6;Mitogen-activated protein kinase 1;Mitogen-activated protein kinase 3;Mitogen-activated protein kinase 4	MAPK6;MAPK1;MAPK3;MAPK4	0	10082000	0	3258900	1816500	0	0	3169200	1239000	0	5265800	7411700	0	0	0	5087600	0	0	0	257960	8102000	850210	0	296370
Eukaryotic initiation factor 4A-I;Eukaryotic initiation factor 4A-II	EIF4A1;EIF4A2	0	0	0	0	0	17463000	0	0	0	0	0	0	0	0	0	0	12191000	0	2741200	3109000	12385000	1182400	6626000	0
F-actin-capping protein subunit beta	CAPZB	0	0	0	0	17034000	0	0	0	0	0	0	0	0	0	0	0	16043000	6648400	1997100	0	12956000	1388900	2503900	6807400
Beta-enolase	ENO3	0	0	0	0	0	0	0	0	0	0	0	0	0	0	0	0	14566000	2425000	8370700	4029000	9318400	1679400	16756000	0
BAG family molecular chaperone regulator 2	BAG2	0	0	0	0	0	0	0	0	0	0	0	0	0	0	0	0	4060400	3088400	2528100	2251700	6447300	1759100	4463700	0
Heterogeneous nuclear ribonucleoprotein A3	HNRNPA3	0	0	0	0	0	0	0	0	4109100	0	0	0	8680500	0	0	0	6842200	3701900	6946500	5650200	4350300	1934800	4954000	3197000
Splicing factor, proline- and glutamine-rich	SFPQ	0	13729000	0	0	6207200	0	0	0	7522000	0	0	0	0	0	0	0	6221500	7884100	5735900	5384300	6067500	1953700	13118000	0
Protein S100-A4	S100A4	986940	4086500	0	7220700	2961500	3558100	7570700	8082000	0	786470	0	1576400	0	3992400	0	5788800	31723000	1707100	826670	1535900	28040000	2047500	1446800	626440
Serine-threonine kinase receptor-associated protein	STRAP	18113000	0	14891000	0	24573000	14103000	13518000	0	10711000	0	0	0	34914000	0	10867000	0	2025500	0	0	0	0	2161700	0	0
26S protease regulatory subunit 6A	PSMC3	0	0	0	0	18563000	10114000	0	0	16462000	0	0	0	0	0	0	0	5481000	7763300	5166300	5274300	4937400	2272800	12328000	5372300
Small nuclear ribonucleoprotein Sm D2	SNRPD2	43774000	0	11051000	0	12619000	0	0	5227700	10079000	1707800	252300	11118000	12971000	0	0	0	9154300	3868500	3056100	1134700	6240100	2407600	4160500	816130
Heterogeneous nuclear ribonucleoprotein F;Heterogeneous nuclear ribonucleoprotein F, N-terminally processed	HNRNPF	0	6447600	7412500	6900600	0	0	0	0	0	2332200	0	0	0	0	0	0	0	2709000	3156400	1223600	0	2819200	2749400	1855100
Vinculin	VCL	17888000	0	0	3560600	51395000	24803000	41420000	0	45841000	7162200	0	2409700	0	0	0	0	28067000	4844900	19007000	17092000	28447000	2940700	47580000	23445000
SCY1-like protein 2	SCYL2	24795000	536320000	138080000	175220000	166740000	75131000	123860000	136910000	108260000	61592000	79417000	171950000	75782000	284850000	123600000	150780000	0	4445500	7363000	7398800	0	3014400	3602300	9346000
Fructose-bisphosphate aldolase A	ALDOA	38288000	39486000	16421000	0	136000000	148270000	198640000	23164000	59916000	21934000	2411200	59963000	153000000	26127000	33018000	0	28425000	12949000	37018000	28373000	21747000	3545300	56801000	22953000
Importin-5	IPO5	0	68458000	0	21289000	37008000	0	24690000	0	65616000	24592000	14346000	19379000	73703000	0	0	22501000	30893000	19782000	0	18974000	28715000	3703400	21632000	9640800
Dual specificity testis-specific protein kinase 2	TESK2	0	88891000	0	0	0	0	0	0	0	0	0	0	0	0	0	0	0	3548100	4210900	4426200	0	3875000	5982800	6014600
Protein S100-A11;Protein S100-A11, N-terminally processed	S100A11	0	11684000	0	0	33577000	0	0	0	16506000	0	0	0	0	0	0	0	6241600	0	7769300	6421800	6583000	3945800	14212000	8358000
WD repeat domain phosphoinositide-interacting protein 1	WIPI1	0	0	0	21162000	15029000	0	53870000	16188000	10707000	0	20773000	16226000	0	66526000	26268000	10809000	0	6306800	0	0	22270000	4010500	0	0
Importin-8	IPO8	0	0	0	0	0	0	0	79609000	0	0	0	0	0	0	0	0	6545700	8692700	2280600	3862300	13850000	4252300	3346200	6195800
40S ribosomal protein SA	RPSA	7520200	11136000	0	0	20094000	0	0	0	16561000	0	0	0	19115000	0	0	0	4782800	3208200	9959600	6783300	5633400	4287100	13897000	5842400
Spindlin-1	SPIN1	12895000	33376000	0	10821000	33367000	9322900	6421100	10645000	26224000	0	11976000	0	0	6816800	0	21585000	3074800	5866200	2838400	3375700	12770000	4405800	4698600	2338700
Mitochondrial carrier homolog 2	MTCH2	0	0	0	0	0	0	0	0	0	0	0	0	0	0	0	0	17050000	5179700	9470900	6342000	8445200	4438200	6662600	5518500
Nucleoside diphosphate kinase A;Nucleoside diphosphate kinase B	NME1;NME2	0	13411000	0	0	0	12974000	15526000	0	25995000	0	0	0	34205000	0	0	0	20369000	3487000	17415000	13263000	15871000	4765700	34844000	8668200
Tubulin beta-2B chain;Tubulin beta-2A chain	TUBB2B;TUBB2A	0	0	0	0	0	0	0	0	0	0	0	0	0	0	0	0	0	7699200	9403900	8167600	5975300	4771800	10128000	8338300
H/ACA ribonucleoprotein complex subunit 1	GAR1	39769000	29880000	18466000	15281000	72156000	0	0	17194000	39397000	0	0	14417000	0	17445000	0	11568000	7984300	8539300	4588600	5430200	7807000	4807900	9748100	5666700
14-3-3 protein epsilon	YWHAE	6998900	10803000	0	0	0	45584000	0	0	0	5482900	0	0	0	0	0	0	39262000	0	29638000	17512000	34976000	5047400	44634000	27559000
UDP-glucose:glycoprotein glucosyltransferase 1	UGGT1	0	0	0	0	0	0	0	0	0	0	0	0	0	0	0	0	0	3696500	13891000	15792000	3074700	5590200	10437000	21304000
DnaJ homolog subfamily A member 1	DNAJA1	0	0	13030000	16983000	8150000	0	9431400	0	0	0	14360000	16443000	0	9278600	0	8024800	6128900	10262000	8727200	0	7711200	5990700	9908200	7859100
Poly(rC)-binding protein 1	PCBP1	22317000	72004000	0	0	84826000	9456700	9174200	0	54660000	0	7481300	0	49044000	21044000	30117000	0	31330000	10496000	4998100	3505300	13464000	6318900	14050000	6667800
14-3-3 protein zeta/delta	YWHAZ	38744000	6555100	0	5589100	140810000	93530000	47774000	15555000	137410000	26053000	2837800	9150100	130500000	8750700	11405000	8223800	78875000	10472000	33584000	33992000	45212000	6447900	97409000	50213000
26S proteasome non-ATPase regulatory subunit 2	PSMD2	7282600	8029300	11114000	13188000	8441200	17407000	10528000	13539000	0	22334000	17243000	27598000	0	17685000	0	13046000	8277800	7118800	12762000	10352000	10862000	6524000	14210000	6290800
Cell division cycle 5-like protein	CDC5L	0	0	0	14275000	0	0	5500700	9125600	0	0	0	0	0	0	0	0	4953800	6913200	9031600	9844000	14802000	6694000	14537000	0
LIM domain and actin-binding protein 1	LIMA1	6443200	239670000	95494000	40533000	5672600	0	60514000	0	4953600	0	7699000	0	15703000	178180000	62490000	222160000	5259800	13103000	11974000	7959300	16140000	6815500	18214000	5345700
Calcium-binding mitochondrial carrier protein SCaMC-1	SLC25A24	0	0	0	0	0	0	0	0	0	0	0	0	0	0	0	0	7360000	7584600	7560200	8395800	7424200	6892700	7129900	6418900
Heat shock protein HSP 90-alpha	HSP90AA1	8046000	0	13717000	0	20419000	15717000	16025000	0	40833000	1195600	0	13196000	23431000	0	0	0	13883000	0	10921000	4726700	17979000	6908300	22849000	7560400
Phosphoglycerate mutase 1	PGAM1	15434000	11579000	7259500	0	94462000	17270000	0	0	28392000	39509000	9376800	0	10050000	0	0	0	30071000	12234000	28683000	25057000	26044000	6984700	85132000	29897000
Polypyrimidine tract-binding protein 1	PTBP1	6652600	0	0	12865000	33681000	0	0	9561700	23836000	8401500	0	7209700	0	0	0	11737000	8792100	7295300	16959000	10422000	19388000	7012200	18266000	6037200
Plasminogen;Plasmin heavy chain A;Activation peptide;Angiostatin;Plasmin heavy chain A, short form;Plasmin light chain B	PLG	21851000	53900000	28629000	26074000	0	57851000	25027000	11421000	16119000	0	42211000	26082000	79805000	0	0	13970000	6322400	6584400	10492000	9785500	8613600	7083100	9965000	7322100
S-phase kinase-associated protein 1	SKP1	0	0	0	0	0	0	0	422280	0	0	0	0	0	0	0	4717700	11746000	7834300	0	10553000	21136000	7216500	18227000	11236000
F-actin-capping protein subunit alpha-1;F-actin-capping protein subunit alpha-2	CAPZA1;CAPZA2	12470000	20312000	13487000	9262300	29668000	0	22934000	18002000	18042000	992430	10170000	6554700	0	21170000	14182000	17280000	16512000	5845800	7308000	5597700	15877000	7558200	11046000	5532000
Filamin-A	FLNA	30402000	28825000	0	17470000	103270000	52286000	8335300	23170000	56352000	0	8706300	5562400	14238000	67683000	12188000	19325000	7922000	0	5685100	1749300	10751000	7573300	15530000	1583000
Drebrin	DBN1	0	326990000	68932000	53989000	0	45660000	60722000	16318000	0	0	0	0	0	508560000	41734000	387870000	99909000	13544000	14945000	4924600	142590000	7741000	16757000	3064600
Small nuclear ribonucleoprotein-associated protein N;Small nuclear ribonucleoprotein-associated proteins B and B	SNRPN;SNRPB	61800000	28591000	22642000	67763000	110170000	58433000	55810000	62060000	80161000	14156000	46595000	46810000	112110000	51717000	36061000	37309000	16298000	7750800	8149100	9120300	12287000	7777000	7466200	10257000
Serine/threonine-protein phosphatase 2A 55 kDa regulatory subunit B beta isoform;Serine/threonine-protein phosphatase 2A 55 kDa regulatory subunit B alpha isoform;Serine/threonine-protein phosphatase 2A 55 kDa regulatory subunit B delta isoform	PPP2R2B;PPP2R2A;PPP2R2D	0	0	0	0	4979700	0	0	0	0	0	0	0	0	0	0	0	0	3446100	3278000	3812900	3723800	8155500	7844100	5437800
DNA damage-binding protein 1	DDB1	0	0	0	0	7853900	0	4697000	0	6535400	0	6355400	0	0	0	0	0	12236000	9690300	4483200	4819800	13089000	8176500	6322700	7206500
Eukaryotic translation initiation factor 2 subunit 1	EIF2S1	18619000	86559000	69301000	59270000	39039000	42527000	47186000	4435600	12668000	5370700	81049000	32431000	0	4219000	0	40781000	12861000	19123000	20214000	8232800	16034000	8203000	24151000	16379000
Glucose-induced degradation protein 8 homolog	GID8	0	11377000	6701800	17894000	9822800	12394000	0	12096000	12098000	17208000	18886000	28619000	0	39276000	8322200	13997000	0	9979600	10217000	7230500	0	8614300	7339000	0
Elongation factor 1-gamma	EEF1G	4184500	18550000	21116000	9799800	15670000	34455000	22075000	17197000	38405000	0	13149000	16488000	44060000	16064000	0	9476200	19689000	5837100	28462000	17185000	20232000	8761900	42176000	20306000
Fragile X mental retardation syndrome-related protein 1	FXR1	0	0	0	3915200	0	0	0	0	0	0	0	0	0	0	0	0	6539300	19299000	16560000	20010000	12298000	8824700	17623000	17819000
Sin3 histone deacetylase corepressor complex component SDS3	SUDS3	0	0	0	0	0	0	0	0	0	0	0	0	0	0	0	0	0	16363000	16720000	12865000	0	8916200	11856000	15104000
Transcription initiation factor TFIID subunit 4	TAF4	18694000	0	0	0	90001000	12726000	0	6907900	52036000	0	9248500	9055000	39267000	0	0	0	4414900	8954800	14679000	14125000	15137000	9206100	16439000	18618000
60 kDa heat shock protein, mitochondrial	HSPD1	20793000	33357000	14133000	10104000	73796000	48148000	44296000	21639000	64621000	6483100	28932000	16293000	19597000	22778000	0	0	52588000	8021800	30397000	37916000	26901000	9314100	70798000	26766000
Non-POU domain-containing octamer-binding protein	NONO	0	0	0	11696000	23735000	0	0	13522000	14505000	18926000	0	0	0	22339000	0	0	14762000	10888000	8460400	10803000	0	9765900	10165000	0
60S ribosomal protein L5	RPL5	27501000	45957000	24410000	0	33026000	13088000	0	5683800	45766000	0	0	9520900	22190000	9971000	17666000	0	5309600	11557000	6466500	3520500	4985600	10040000	8755800	2956100
ADP/ATP translocase 1	SLC25A4	0	40632000	0	10983000	11347000	10798000	0	11539000	40294000	0	9718000	12625000	61269000	41207000	20356000	16747000	15452000	17100000	24736000	23339000	16343000	10445000	27260000	22245000
UBX domain-containing protein 1	UBXN1	0	0	0	0	0	0	0	0	0	0	0	0	0	0	0	0	20440000	14355000	14884000	13256000	20331000	10740000	19703000	10624000
Tricarboxylate transport protein, mitochondrial	SLC25A1	0	11736000	0	0	0	8250800	0	9540100	8573700	0	9946300	0	6277400	9190100	0	0	0	8752100	16515000	15654000	0	10793000	11938000	11581000
60S ribosomal protein L36	RPL36	0	0	0	0	19028000	0	0	0	0	0	0	0	0	0	0	0	7391600	10735000	9975500	10131000	3094400	11686000	15144000	19918000
Histone deacetylase 2	HDAC2	0	0	0	0	0	16959000	10047000	0	0	0	0	9279900	0	0	0	0	1507400	15633000	11122000	14090000	1634700	12180000	10571000	14739000
Aldo-keto reductase family 1 member B10	AKR1B10	19735000	87443000	23753000	28548000	49989000	90407000	95617000	0	15609000	0	49593000	25476000	159080000	0	9624600	0	13358000	3215700	41012000	31217000	44522000	12611000	81173000	27036000
Protein SGT1	ECD	0	0	0	0	0	0	0	0	0	0	0	0	0	0	0	0	8949600	14636000	8459100	6919000	46736000	12664000	8914600	0
40S ribosomal protein S2	RPS2	0	12556000	0	0	0	0	0	0	11568000	0	0	0	0	0	0	0	26399000	6781600	14830000	13800000	43390000	12821000	26619000	9188800
Protein S100-A10	S100A10	0	24851000	0	11297000	41545000	37534000	18778000	19676000	25073000	0	0	0	29256000	21726000	0	0	27638000	21439000	0	0	18878000	13299000	9861200	7698800
Importin-7	IPO7	0	21493000	0	23354000	5673100	15733000	18427000	31963000	8099100	0	0	11829000	0	0	9453500	12118000	34646000	37333000	43538000	43863000	32321000	13523000	35155000	42685000
40S ribosomal protein S3	RPS3	17835000	21337000	0	19379000	79426000	41102000	29693000	23500000	30974000	0	0	21547000	58062000	22796000	0	18544000	35005000	16485000	21868000	8198300	30497000	13695000	37334000	16127000
Tubulin alpha-1A chain;Tubulin alpha-3C/D chain;Tubulin alpha-3E chain	TUBA1A;TUBA3C;TUBA3E	22980000	85843000	25123000	40364000	63713000	61849000	41504000	49138000	84197000	40293000	52937000	43730000	64434000	128360000	27928000	52182000	18689000	38301000	28740000	28058000	8256100	13778000	31081000	28799000
SUN domain-containing protein 2	SUN2	45226000	19684000	7867000	13193000	74042000	22045000	18565000	11834000	135360000	0	70332000	51893000	29690000	36054000	6593000	0	20627000	15280000	15434000	8544500	25806000	14797000	4758400	3657900
60S ribosomal protein L14	RPL14	33895000	0	10948000	24583000	70498000	14412000	43886000	36591000	0	0	27985000	37285000	0	27513000	43229000	23440000	29880000	33306000	25130000	21720000	24376000	16940000	37796000	41152000
Nucleophosmin	NPM1	17141000	43879000	24233000	0	110630000	116670000	38112000	0	77674000	0	0	0	130520000	16030000	32758000	9331100	33161000	23595000	17339000	23178000	50132000	16983000	35726000	18059000
Protein S100-A6	S100A6	90854000	128330000	111380000	51175000	217420000	124690000	27796000	40296000	201280000	133800000	37903000	66085000	111410000	146140000	22873000	58806000	43254000	22033000	28533000	81779000	24305000	17564000	113700000	65557000
OTU domain-containing protein 4	OTUD4	57010000	3330800	5563400	5033500	158070000	0	0	0	183960000	0	6180000	6112200	11545000	6797200	0	0	10146000	27242000	15916000	11428000	12136000	17688000	17893000	11429000
T-complex protein 1 subunit zeta-2	CCT6B	2120700	61463000	43228000	69098000	17257000	0	43514000	87891000	18991000	13471000	106990000	111140000	20153000	48210000	29914000	66703000	5923000	15232000	29593000	37965000	5704300	17925000	25804000	28235000
40S ribosomal protein S27-like;40S ribosomal protein S27	RPS27L;RPS27	0	24104000	0	15473000	37356000	18268000	16358000	0	34267000	0	0	28276000	0	0	0	9104900	37037000	12191000	3166200	22214000	14994000	18988000	20002000	24227000
RNA polymerase II elongation factor ELL	ELL	0	21103000	0	0	24041000	13583000	16409000	0	21529000	0	11016000	0	17886000	8633100	11035000	0	5319800	15622000	12170000	16488000	6772000	19555000	11715000	13598000
Transgelin-2	TAGLN2	48298000	89248000	31202000	10819000	194960000	68646000	78705000	17676000	97246000	4102300	15304000	16438000	130270000	17888000	0	9483000	68367000	14738000	40936000	36231000	41219000	19792000	89115000	25115000
Unconventional myosin-XVIIIa	MYO18A	15150000	129060000	39195000	159260000	164500000	171420000	71465000	144970000	170960000	55914000	189010000	127300000	53691000	119920000	22529000	41186000	25002000	13237000	26039000	6922700	16264000	20085000	11736000	7897800
ATP synthase subunit alpha, mitochondrial	ATP5A1	59432000	127710000	38909000	51234000	124690000	138470000	155370000	59821000	98228000	0	96998000	107910000	131310000	57178000	31843000	97751000	40881000	15536000	58799000	40561000	48666000	20771000	71811000	35625000
60S ribosomal protein L23	RPL23	41839000	57719000	30277000	0	112490000	22942000	0	25152000	96667000	13359000	0	0	20277000	6057500	0	0	33807000	21820000	29898000	36751000	18879000	22094000	37487000	38306000
Leucine-rich repeat and calponin homology domain-containing protein 3	LRCH3	0	33865000	4761900	31649000	9929500	7676300	0	13667000	0	0	5367600	14932000	41622000	8719100	11302000	30798000	6017700	32139000	29980000	22416000	17347000	22581000	14182000	14454000
40S ribosomal protein S4, X isoform	RPS4X	11599000	12377000	14241000	4675000	35857000	13966000	16606000	14314000	42161000	2138000	8955300	4160000	0	4288800	9170800	0	29288000	35071000	30355000	39263000	23388000	22698000	56871000	26891000
Thymidylate synthase	TYMS	57683000	20506000	0	5624500	154990000	26747000	22979000	13224000	139120000	0	0	7945400	99606000	17894000	12221000	17036000	49445000	28788000	31237000	24019000	41657000	23147000	31982000	28105000
L-lactate dehydrogenase A chain	LDHA	147570000	237030000	13753000	44506000	539950000	373910000	371540000	135580000	422800000	156220000	127160000	173850000	435160000	110400000	82598000	45588000	205720000	69095000	198450000	134290000	156970000	24049000	253330000	104680000
Engulfment and cell motility protein 2	ELMO2	20851000	50686000	31107000	8115200	48158000	24701000	8005000	7573100	31361000	0	0	12196000	0	0	0	6631500	20615000	18995000	16170000	15525000	20188000	25241000	15821000	17307000
Eukaryotic translation initiation factor 2 subunit 3;Putative eukaryotic translation initiation factor 2 subunit 3-like protein	EIF2S3;EIF2S3L	48511000	205130000	12801000	38533000	77364000	80536000	42230000	38158000	52485000	16489000	35661000	11886000	0	18123000	10183000	14231000	34313000	23816000	30899000	18222000	16351000	25947000	21033000	29952000
ATP synthase subunit beta, mitochondrial	ATP5B	9532300	105410000	0	29360000	54376000	74723000	99485000	47920000	79070000	8086000	38123000	43535000	44095000	38328000	0	26432000	77009000	31435000	68357000	55352000	51278000	28027000	134380000	70853000
14-3-3 protein theta	YWHAQ	43982000	48267000	0	0	109750000	72502000	38696000	0	113570000	14387000	8531200	15584000	140740000	42924000	17833000	0	46479000	38115000	45397000	16600000	49176000	28339000	30743000	8866000
Eukaryotic translation initiation factor 2-alpha kinase 3	EIF2AK3	0	20279000	0	12893000	0	14400000	11151000	11225000	0	0	11186000	13229000	0	0	0	0	7892400	23032000	19862000	26466000	8502900	28850000	25812000	26085000
ATP-dependent RNA helicase DDX3X;ATP-dependent RNA helicase DDX3Y	DDX3X;DDX3Y	7499300	29513000	4514300	25030000	57801000	0	9386000	26283000	43564000	9853400	46025000	31263000	14023000	31051000	2734300	41933000	34772000	38472000	38853000	23743000	43073000	31445000	50205000	42835000
Aldo-keto reductase family 1 member B15	AKR1B15	85300000	231290000	48228000	73199000	186570000	54069000	262790000	146950000	176270000	56267000	110870000	145310000	226300000	78167000	77299000	87172000	87503000	41165000	129680000	87806000	68607000	32230000	225510000	72166000
Small nuclear ribonucleoprotein Sm D3	SNRPD3	85462000	88443000	24418000	54694000	126770000	120540000	98486000	98382000	94170000	10638000	63779000	54900000	0	19100000	0	41725000	33326000	18021000	29316000	32685000	33639000	32295000	44907000	52637000
Phosphate carrier protein, mitochondrial	SLC25A3	7058100	30699000	19486000	5983900	0	21971000	10077000	7429100	20008000	0	22422000	0	26263000	0	0	0	12984000	26318000	18705000	10327000	5865800	32551000	14463000	13906000
Heat shock protein HSP 90-beta	HSP90AB1	181760000	363660000	26043000	50318000	604710000	284510000	212990000	100570000	444640000	4601600	96511000	126350000	317310000	78203000	57657000	33208000	197210000	52409000	98066000	75630000	160370000	34792000	175660000	64156000
Ubiquitin carboxyl-terminal hydrolase 15	USP15	10498000	50295000	0	36969000	30699000	9069000	14074000	30416000	0	25707000	62567000	47247000	0	7773800	15348000	17945000	16118000	49268000	46653000	44573000	22303000	35088000	44377000	47460000
Alpha-enolase	ENO1	25467000	136960000	24548000	26958000	361320000	130730000	195960000	33414000	240600000	117250000	18947000	35233000	90156000	25416000	34375000	35269000	238000000	64041000	140300000	140880000	148240000	35845000	260670000	130410000
Glyceraldehyde-3-phosphate dehydrogenase	GAPDH	134880000	106550000	15615000	14680000	262290000	74819000	145120000	67760000	100400000	23884000	37594000	20810000	16021000	0	0	0	37944000	23613000	53372000	62779000	156180000	37413000	78244000	58540000
Phosphoglycerate kinase 1	PGK1	128020000	138490000	30960000	20994000	382480000	144730000	306210000	167980000	280590000	136000000	56804000	115500000	159810000	16281000	10084000	18430000	158590000	28087000	136900000	80589000	199900000	38407000	238000000	77470000
Influenza virus NS1A-binding protein	IVNS1ABP	0	40160000	19640000	0	22307000	72512000	5471700	35194000	72385000	21782000	39048000	57045000	0	43731000	0	0	11785000	48175000	41136000	39530000	39553000	39071000	40735000	40602000
Ankycorbin	RAI14	13572000	82777000	87083000	26717000	0	139310000	0	0	0	0	0	0	0	0	0	0	32281000	42503000	44138000	55357000	32657000	40398000	47501000	54205000
Peroxiredoxin-5, mitochondrial	PRDX5	280190000	73610000	0	33733000	280480000	85796000	61769000	51773000	243270000	138090000	13906000	35427000	103700000	99036000	27414000	33700000	76554000	56814000	87899000	82272000	52886000	41808000	181660000	88441000
Tropomyosin alpha-4 chain	TPM4	0	87738000	43497000	38097000	111540000	24329000	64930000	61100000	29854000	0	51062000	40830000	7035000	83781000	40856000	57030000	293500000	37850000	39761000	34289000	414940000	42099000	68716000	26039000
Importin-9	IPO9	0	75379000	65313000	102630000	85180000	128830000	130450000	127880000	57068000	0	29148000	15330000	88431000	62582000	24850000	0	82928000	59192000	56098000	60766000	103360000	42848000	44690000	48255000
40S ribosomal protein S6	RPS6	5969900	0	0	0	24281000	0	0	9261900	0	0	0	21728000	0	0	0	0	47302000	43295000	62494000	39277000	47900000	44584000	62691000	39810000
60S acidic ribosomal protein P2	RPLP2	25007000	59947000	0	0	45140000	23294000	0	15254000	48255000	0	0	0	0	0	0	0	51848000	28232000	31022000	34625000	33289000	46236000	34838000	31856000
Elongation factor 2	EEF2	0	72969000	36192000	21004000	257760000	61690000	79858000	56419000	119000000	40082000	47715000	53825000	37705000	11329000	0	5271600	105930000	41407000	59655000	51461000	90055000	48162000	108980000	37569000
Cofilin-1	CFL1	158780000	381330000	63941000	94358000	564270000	202970000	162610000	135690000	444190000	57355000	169650000	177190000	374010000	166990000	38943000	79160000	145300000	49534000	89191000	91065000	79656000	48282000	283520000	110490000
Girdin	CCDC88A	0	60269000	45240000	87180000	58821000	139490000	44346000	44915000	49644000	51275000	127640000	69714000	0	42716000	19869000	109720000	26720000	45849000	34846000	30533000	11961000	48580000	45614000	31650000
Pyruvate kinase PKM	PKM	106390000	166490000	11525000	28592000	327130000	219650000	289840000	108480000	320260000	90157000	76295000	189680000	195800000	78125000	16756000	96193000	270030000	70121000	220700000	159970000	189220000	49461000	375490000	154650000
60S ribosomal protein L13	RPL13	42211000	58459000	38502000	50902000	159020000	49275000	84827000	44694000	127490000	29101000	57614000	20489000	109260000	36723000	14846000	31184000	51704000	66591000	21020000	17212000	44719000	51408000	31807000	36555000
Integrin alpha-3;Integrin alpha-3 heavy chain;Integrin alpha-3 light chain	ITGA3	0	161140000	0	13010000	13901000	208360000	16842000	21132000	28730000	0	30297000	31760000	184010000	40488000	38752000	41840000	20903000	53943000	78273000	80409000	16797000	55735000	62822000	70675000
ADP/ATP translocase 3;ADP/ATP translocase 3, N-terminally processed	SLC25A6	18316000	33072000	53660000	78341000	0	26303000	43657000	49770000	24628000	22939000	40923000	48741000	0	28584000	15769000	28982000	46354000	60718000	71433000	69974000	42080000	57642000	69522000	76424000
60S ribosomal protein L19	RPL19	38623000	48213000	54947000	22260000	190940000	25720000	128260000	52394000	12140000	49036000	47884000	70634000	127590000	44668000	83824000	111700000	51556000	60958000	46626000	47447000	42277000	57854000	53675000	71150000
Beta/gamma crystallin domain-containing protein 3	CRYBG3	160520000	322270000	0	133260000	491810000	610720000	260230000	153800000	311070000	11725000	235360000	221520000	417820000	0	8154000	51612000	193770000	62602000	218200000	150170000	62685000	58291000	72056000	89097000
Heat shock 70 kDa protein 6;Putative heat shock 70 kDa protein 7	HSPA6;HSPA7	89263000	147030000	105070000	35287000	255760000	106100000	150340000	32548000	0	14818000	109640000	0	192070000	0	96276000	27820000	35914000	33203000	49203000	32601000	38266000	58503000	66277000	26118000
Polyadenylate-binding protein 1	PABPC1	45401000	35585000	18099000	17977000	86298000	59194000	51396000	4248900	88094000	11003000	57902000	34980000	53382000	0	0	16769000	89064000	70227000	57082000	39137000	63392000	62269000	65144000	54311000
Unconventional myosin-Ie	MYO1E	8874100	157120000	50376000	155340000	60180000	160790000	80392000	141130000	13566000	0	12916000	4250100	55737000	78801000	29058000	141650000	650350000	58057000	75348000	85369000	823620000	63446000	115020000	37089000
Actin, cytoplasmic 1;Actin, cytoplasmic 1, N-terminally processed	ACTB	78215000	716950000	81239000	468840000	101620000	342910000	160240000	364840000	32509000	48388000	61456000	95890000	50042000	798340000	36366000	23945000	273780000	370920000	70859000	333740000	163190000	63517000	494210000	216750000
60S ribosomal protein L24	RPL24	45598000	99937000	0	44547000	128980000	89310000	50558000	46536000	110270000	0	35137000	35894000	38099000	0	10717000	17894000	56209000	69817000	58447000	58510000	38608000	67613000	86165000	93277000
60S ribosomal protein L38	RPL38	0	42155000	0	64397000	79980000	0	53688000	53591000	136830000	0	46783000	50101000	64876000	0	0	24494000	50769000	58742000	62184000	58031000	51851000	70603000	58971000	64012000
Zinc finger CCCH domain-containing protein 7A	ZC3H7A	36784000	175550000	25189000	0	69794000	322040000	191690000	0	53720000	0	48998000	0	12121000	0	146860000	11627000	36013000	59876000	57837000	48693000	448660000	71534000	67049000	46992000
60S ribosomal protein L6	RPL6	12849000	7236500	60177000	0	54271000	9009800	9823400	6270600	15879000	0	20492000	0	15636000	2475200	0	0	43328000	77779000	50531000	45926000	71265000	74312000	81754000	55844000
40S ribosomal protein S9	RPS9	46787000	97047000	12369000	0	123940000	28831000	92945000	23011000	101610000	0	15095000	0	57837000	23599000	7162200	0	79407000	80801000	83882000	81179000	78081000	76490000	120320000	98214000
Serine/threonine-protein kinase RIO1	RIOK1	137850000	219270000	246780000	143830000	360570000	279430000	116800000	134490000	262770000	0	92388000	87561000	137230000	47001000	0	120420000	98432000	84494000	84795000	72330000	89063000	77698000	101860000	90278000
Major vault protein	MVP	44414000	122180000	65176000	86335000	105130000	67902000	26852000	88804000	80157000	17183000	105860000	68492000	61084000	59069000	13913000	120890000	82207000	51747000	53256000	31526000	76714000	78235000	58997000	23192000
60S ribosomal protein L4	RPL4	8801400	73264000	33940000	35943000	81575000	13297000	27292000	72497000	55471000	0	102790000	63926000	51449000	17061000	0	50450000	56646000	105880000	55673000	80031000	75134000	88360000	70383000	74486000
60S ribosomal protein L12	RPL12	122150000	120930000	8167100	23853000	209800000	81312000	62954000	34263000	131730000	19985000	50782000	33263000	152450000	0	0	15869000	78622000	112080000	83540000	99308000	42716000	89008000	92159000	99060000
Tropomyosin alpha-3 chain	TPM3	10502000	479530000	221140000	72238000	148130000	96162000	97299000	232890000	97125000	0	23673000	120370000	10138000	418000000	32587000	375560000	430590000	124680000	128500000	101930000	727340000	93566000	162870000	98764000
Sulfide:quinone oxidoreductase, mitochondrial	SQRDL	51535000	212850000	69825000	86178000	165690000	189680000	74146000	112780000	20850000	12296000	68408000	80582000	197410000	64248000	10785000	111830000	71685000	102350000	115960000	116160000	77674000	99126000	115040000	124820000
Heterogeneous nuclear ribonucleoprotein K	HNRNPK	100360000	130800000	19357000	101010000	195920000	113360000	52104000	97740000	235330000	85751000	106140000	81960000	133580000	115560000	44207000	104330000	130430000	106900000	115030000	87279000	122010000	99135000	153180000	120600000
Methylosome subunit pICln	CLNS1A	195470000	245830000	246040000	233510000	296070000	241550000	248330000	223700000	254680000	24997000	160010000	172790000	327760000	175300000	72837000	181080000	148350000	96032000	151420000	124240000	95924000	100130000	143660000	166140000
Ras GTPase-activating-like protein IQGAP1	IQGAP1	0	15558000	0	27560000	77574000	18168000	16545000	12063000	109420000	0	16268000	22260000	52683000	20503000	66728000	23990000	40606000	130500000	104940000	94185000	69055000	101960000	94017000	97298000
Neuroblast differentiation-associated protein AHNAK	AHNAK	127120000	258950000	34168000	33946000	581770000	240600000	243670000	96767000	436520000	32982000	113290000	120300000	318480000	85697000	135480000	57880000	286780000	147920000	282390000	210520000	161260000	102750000	570630000	227820000
Heterogeneous nuclear ribonucleoprotein M	HNRNPM	18191000	15309000	0	0	16115000	14625000	0	0	19591000	0	0	0	15078000	0	0	0	85313000	84036000	86662000	83771000	82522000	109180000	115880000	94331000
60S ribosomal protein L3	RPL3	15638000	11867000	76258000	7190800	145010000	18011000	92041000	51200000	68933000	48732000	62326000	12879000	67129000	0	0	9405500	76358000	89430000	101840000	94683000	63819000	119800000	110640000	106420000
Fatty acyl-CoA reductase 1	FAR1	29550000	128950000	139040000	196590000	59028000	165710000	197590000	206900000	58513000	11307000	167770000	158330000	28906000	31419000	7475000	80068000	68472000	130810000	140800000	135080000	98060000	120240000	128370000	126490000
Putative elongation factor 1-alpha-like 3;Elongation factor 1-alpha 1;Elongation factor 1-alpha 2	EEF1A1P5;EEF1A1;EEF1A2	375670000	530630000	287510000	267860000	1413200000	1560600000	2055700000	353270000	1270300000	24025000	356110000	387350000	581220000	93038000	1151200000	135360000	271760000	154620000	241310000	267930000	265320000	135250000	385780000	263980000
Small nuclear ribonucleoprotein Sm D1	SNRPD1	394780000	178020000	38046000	18830000	586890000	92021000	81480000	78186000	513170000	0	87588000	25626000	512800000	0	0	20795000	241100000	100670000	92555000	120270000	143970000	135800000	109520000	116570000
60S ribosomal protein L10a	RPL10A	39184000	70560000	11172000	81820000	74253000	72164000	63259000	60967000	82395000	0	38262000	39161000	102670000	37275000	16069000	60828000	78435000	104720000	104420000	100860000	102550000	135900000	131530000	121480000
Serine/threonine-protein kinase 38-like	STK38L	7345600	129340000	61583000	114510000	66533000	52923000	92104000	92150000	79470000	17691000	150670000	143490000	19292000	131420000	39650000	130010000	64937000	138130000	128050000	117590000	48063000	137040000	137760000	123840000
Unconventional myosin-Va	MYO5A	2941700	684110000	79849000	230150000	341780000	425200000	252580000	286100000	113970000	20262000	135970000	93040000	157980000	167460000	100350000	171470000	310260000	160970000	158180000	176400000	320190000	141200000	123520000	91762000
Peroxiredoxin-1	PRDX1	404680000	497220000	423150000	449080000	1239400000	753670000	799730000	770940000	749100000	107680000	581720000	684630000	487660000	112280000	42337000	346290000	123980000	161210000	189280000	186140000	161120000	145640000	298030000	177140000
40S ribosomal protein S8	RPS8	22893000	32564000	15324000	30055000	234000000	11229000	75481000	51692000	60284000	0	18583000	14677000	10848000	0	5984100	11965000	150000000	168010000	188470000	147730000	174790000	146030000	203270000	142680000
60S acidic ribosomal protein P1	RPLP1	64845000	43091000	0	15353000	135810000	49804000	23719000	14012000	125020000	98031000	23291000	16463000	68863000	27840000	11640000	18851000	148220000	83124000	128730000	61802000	118250000	150200000	105240000	57020000
Actin-related protein 2/3 complex subunit 1B	ARPC1B	30515000	752930000	370290000	302210000	216950000	395230000	360510000	172190000	53352000	0	249850000	130740000	918930000	183830000	147210000	235680000	160230000	158950000	143020000	174180000	184810000	156630000	142800000	115890000
Mitogen-activated protein kinase 12	MAPK12	14238000	502010000	201290000	270340000	140460000	551910000	225060000	262580000	77393000	79056000	245640000	250010000	5948200	252540000	75389000	287810000	6159500	146410000	133540000	113830000	7576900	158720000	136230000	117340000
60S ribosomal protein L7a	RPL7A	105660000	145260000	112890000	51689000	406960000	77322000	112020000	61095000	222390000	0	49778000	67030000	73085000	0	0	87323000	182300000	175990000	187180000	181000000	151180000	160080000	210210000	191850000
Leucine-rich repeat flightless-interacting protein 2	LRRFIP2	1036000000	557680000	1015500000	751740000	1674200000	478500000	1100400000	866730000	894770000	322020000	931840000	552100000	389930000	192770000	301310000	238010000	39029000	192930000	180150000	163620000	49273000	166510000	197870000	214480000
Calcium/calmodulin-dependent protein kinase type II subunit delta	CAMK2D	192190000	7026300	0	0	300520000	0	0	0	416800000	0	0	0	95477000	0	0	0	59395000	201800000	124670000	103170000	80465000	178200000	107490000	162340000
rRNA 2-O-methyltransferase fibrillarin	FBL	40887000	879820000	444660000	369580000	127580000	606810000	403760000	251200000	66910000	58864000	356310000	280860000	0	183390000	100170000	276960000	42920000	176830000	151710000	183670000	41471000	196490000	180290000	160870000
60S acidic ribosomal protein P0;60S acidic ribosomal protein P0-like	RPLP0;RPLP0P6	169790000	228140000	21205000	105000000	487600000	152720000	110500000	107350000	378580000	22515000	66267000	65725000	250020000	50943000	3112900	67574000	224430000	245610000	192370000	184040000	230160000	205400000	234260000	179310000
Myosin regulatory light chain 12A	MYL12A	27686000	0	35915000	29404000	0	0	35877000	46371000	0	7273700	0	0	0	0	0	10108000	304360000	149840000	100770000	165480000	1001900000	213630000	251770000	141610000
Leucine-rich repeat flightless-interacting protein 1	LRRFIP1	195730000	745640000	407930000	380370000	734530000	312080000	459870000	415780000	1026300000	30947000	647570000	563560000	798310000	341680000	42020000	268610000	49007000	190420000	204890000	166120000	87614000	219670000	226860000	253740000
78 kDa glucose-regulated protein	HSPA5	117270000	252090000	138840000	175020000	261130000	222420000	280440000	279500000	300540000	5868200	151470000	168520000	151910000	168690000	86156000	145870000	407400000	245340000	335090000	323360000	283040000	240730000	412560000	239760000
Annexin A2;Putative annexin A2-like protein	ANXA2;ANXA2P2	414130000	1699500000	664100000	349290000	1583700000	1363700000	1495400000	811750000	893860000	427220000	812550000	650010000	1594400000	813570000	381310000	441390000	456880000	317140000	573940000	446540000	393800000	252090000	958200000	468300000
Dedicator of cytokinesis protein 7	DOCK7	69158000	206450000	89153000	90908000	311640000	236990000	114380000	65107000	192960000	0	11002000	4250900	91163000	75502000	20536000	20439000	68850000	301770000	223990000	205000000	116810000	253500000	265790000	228950000
Serine/threonine-protein kinase 38	STK38	489930000	959910000	695710000	547800000	791550000	704720000	689960000	729050000	680400000	234350000	848660000	775510000	774570000	669320000	392920000	695600000	100720000	271470000	281720000	266680000	138520000	270300000	293260000	281760000
Myosin-10	MYH10	77601000	533220000	646650000	458120000	178850000	1044900000	592110000	476250000	266520000	13350000	492310000	325670000	255830000	602710000	288830000	765810000	548970000	198730000	211790000	211820000	1052100000	278690000	204340000	122810000
Actin-related protein 2/3 complex subunit 3	ARPC3	73407000	562630000	325490000	303540000	192720000	351690000	266060000	275510000	63534000	16546000	121220000	82295000	411610000	95718000	182260000	139780000	325640000	321080000	176770000	289540000	371630000	284550000	282950000	268370000
Calmodulin	CALM1	102200000	515310000	430530000	631280000	171480000	595280000	813230000	652090000	75188000	78886000	279940000	262710000	187820000	672250000	192720000	424780000	582470000	344150000	245700000	409700000	378020000	287570000	464130000	373270000
Heterogeneous nuclear ribonucleoprotein H;Heterogeneous nuclear ribonucleoprotein H, N-terminally processed	HNRNPH1	114860000	433330000	219360000	147120000	273720000	406360000	323700000	193360000	259210000	40550000	252400000	147380000	249230000	440720000	161520000	160600000	139630000	344760000	295850000	260420000	126040000	298230000	309180000	271170000
Ubiquitin-60S ribosomal protein L40;Ubiquitin;60S ribosomal protein L40;Ubiquitin-40S ribosomal protein S27a;Ubiquitin;40S ribosomal protein S27a;Polyubiquitin-B;Ubiquitin;Polyubiquitin-C;Ubiquitin	UBA52;RPS27A;UBB;UBC	186570000	1266500000	548650000	434610000	376010000	670990000	465660000	348270000	312520000	8438000	391810000	275290000	229030000	453180000	291040000	335350000	206160000	420720000	355650000	377200000	218380000	374660000	403500000	311460000
Heat shock cognate 71 kDa protein	HSPA8	496360000	1041300000	435460000	493420000	1308800000	1061700000	798210000	662170000	1267600000	197450000	545780000	623810000	885840000	512440000	237240000	406620000	674760000	440550000	647540000	464200000	700130000	380100000	841030000	506700000
Calcium/calmodulin-dependent protein kinase type II subunit gamma	CAMK2G	423500000	23214000	0	7785700	575240000	0	0	0	628790000	0	0	0	143190000	0	0	5569200	106760000	673070000	344160000	369530000	134000000	543960000	413280000	503750000
Actin-related protein 2	ACTR2	24108000	503000000	311520000	384290000	210360000	444530000	395850000	599330000	116700000	48264000	283230000	220370000	422850000	430640000	58228000	403540000	732480000	553320000	664810000	683040000	841200000	618660000	534760000	571570000
Actin-related protein 2/3 complex subunit 2	ARPC2	244940000	1376000000	630630000	776990000	431710000	835260000	754950000	889100000	199000000	22288000	356660000	200950000	1108500000	614090000	126080000	661030000	803790000	611630000	822420000	642500000	1002600000	753500000	988400000	712070000
Actin-related protein 3	ACTR3	261830000	2280100000	640560000	704930000	660270000	1008500000	630540000	779470000	316920000	248190000	348430000	301280000	1302200000	1550500000	276120000	711840000	959150000	896960000	990810000	1101600000	1031800000	792870000	1151400000	903990000
Gelsolin	GSN	386740000	3651600000	2301100000	1605800000	852820000	2764600000	1395700000	1909400000	468770000	46495000	774720000	374850000	880250000	800150000	242630000	933140000	947450000	668170000	592540000	848450000	896060000	883840000	939510000	767130000
Tubulin alpha-1B chain;Tubulin alpha-4A chain	TUBA1B;TUBA4A	902110000	2087000000	751240000	1075600000	2073900000	1462700000	1351700000	1448900000	2063300000	827320000	1344400000	1322300000	1968300000	1481700000	371120000	1061200000	976000000	1123200000	1217500000	1294800000	1013700000	916730000	1567000000	1251200000
Tubulin beta-4B chain;Tubulin beta-4A chain	TUBB4B;TUBB4A	895780000	1608700000	623060000	916390000	1833200000	1784800000	1059000000	983360000	1405900000	420340000	842300000	836310000	1117500000	693230000	262300000	456880000	1014100000	1128900000	1273000000	1167700000	1211000000	1117400000	1571000000	1233400000
Unconventional myosin-Ic	MYO1C	1041300000	7224200000	3100700000	4481400000	2291500000	4610100000	3253700000	4348100000	1187800000	498300000	1621200000	1542700000	3536100000	5115100000	1541100000	3382900000	2826100000	1384700000	1681100000	1481100000	3744600000	1134000000	1608700000	741570000
Protein flightless-1 homolog	FLII	2616100000	4556600000	1742600000	2002800000	7254400000	4073800000	2160600000	2259400000	5690600000	836550000	2988400000	2576200000	3777700000	2432400000	922920000	1466100000	600900000	1431500000	1262100000	1094300000	660170000	1246600000	1326500000	1237900000
Unconventional myosin-Ib	MYO1B	469460000	1529800000	1554500000	1496100000	808360000	3005900000	1794800000	1757200000	800610000	267330000	1096200000	749690000	1017200000	1783500000	652130000	1332400000	2651800000	1779700000	1587100000	1806400000	3323000000	1440300000	1629700000	1375000000
Myosin regulatory light chain 12B	MYL12B	930080000	3278600000	1995900000	1818100000	2434000000	3623100000	3429000000	2497200000	1231100000	49216000	1192300000	1161900000	2326600000	2035000000	1730700000	2598800000	6071200000	1821000000	1960400000	1840600000	6514000000	1634000000	2594900000	1551300000
Actin, alpha cardiac muscle 1;Actin, gamma-enteric smooth muscle;Actin, alpha skeletal muscle;Actin, aortic smooth muscle	ACTC1;ACTG2;ACTA1;ACTA2	1210000000	9514000000	9444500000	8743200000	3438900000	8245200000	7878000000	11571000000	2418100000	169240000	3341700000	3851700000	4345900000	14222000000	7967800000	8629900000	2253500000	1680700000	1731400000	1494900000	1047200000	1745500000	1800300000	213220000
Myosin light polypeptide 6	MYL6	570440000	5778600000	4172000000	2482500000	2679900000	4636300000	3339400000	2283700000	1298700000	617770000	2170100000	1449600000	2255300000	5000900000	2439200000	3208600000	7762000000	1949000000	2601200000	2118400000	9500600000	2011500000	3357600000	1846600000
Protein arginine N-methyltransferase 5;Protein arginine N-methyltransferase 5, N-terminally processed	PRMT5	20727000000	40382000000	21304000000	16321000000	28025000000	31341000000	19814000000	16598000000	26158000000	8101500000	22152000000	16210000000	24911000000	20854000000	6232800000	11453000000	8024800000	13160000000	11098000000	11821000000	7412000000	9950800000	10839000000	11962000000
Myosin-9	MYH9	8101700000	47177000000	18211000000	26087000000	19910000000	39522000000	25569000000	25516000000	14938000000	5791100000	17781000000	16500000000	23209000000	41496000000	17606000000	32003000000	59220000000	13708000000	13790000000	12953000000	89826000000	12636000000	15004000000	9974000000
Eukaryotic translation initiation factor 5B	EIF5B	13830000000	46843000000	31113000000	28178000000	32101000000	45943000000	27451000000	28172000000	31099000000	13232000000	34431000000	27718000000	25494000000	32013000000	12139000000	25290000000	7293000000	11935000000	12396000000	13987000000	6925200000	13518000000	12801000000	13867000000
Ig kappa chain V-II region TEW;Ig kappa chain V-II region Cum;Ig kappa chain V-II region GM607;Ig kappa chain V-II region RPMI 6410		34832000000	80915000000	41452000000	32680000000	61717000000	44246000000	50617000000	40742000000	41775000000	12280000000	56491000000	45491000000	41573000000	37365000000	5870900000	43589000000	2330700000	18467000000	5220700000	4118100000	16921000000	18069000000	5072500000	4378600000
Actin, cytoplasmic 2;Actin, cytoplasmic 2, N-terminally processed	ACTG1	41158000000	185770000000	165440000000	124430000000	67069000000	131150000000	155340000000	90397000000	37956000000	18344000000	51634000000	41809000000	60182000000	113210000000	81856000000	114550000000	29908000000	26295000000	29802000000	25880000000	33963000000	25354000000	31706000000	26369000000

## Sheet: S2B. All Substrate Hits
Table S1B. 17 trapped substrate protein hits from MDA-MB-468 cells
Raw values from MaxQuant label-free quantitation used in this table were taken from Table S2A: Trial 2- columns D-G; Trial 3- columns Q-T; Trial 4- columns AD-AG; Trial 5- columns AQ-AT; Trial 6- columns BD-BG
Raw data were first normalized (indicated by "WT norm", "MT norm", and MT+SA norm" for each trial) to the levels of HDAC1 in that trial (indicated by "HD1 WT", "HD1 Mutant", or "HD1 Mutant + SAHA")
Next, the normalized values were compared to yield fold enrichment ratios: No protein control divided by wild type; mutant divided by wild type; mutant divided by mutant+ SAHA (see orange highlighted columns)
In a case where the wild type or mutant+SAHA sample contained no intensity signal, an infinity (∞) sign is shown.
The number of trials where each proteins shows at least 2-fold higher enrichment in mutant compared to wild type, with also higher intensity in wild type compared to the no protein control or mutant compared to mutant + SAHA, is shown in column BQ (blue highlight)
The 17 proteins hits are listed in order of number of trials showing the minimal enrichment described above.
The color coding of each protein name corresponds to the number of trials where that protein was enriched: 3 trials (yellow highlight) or 2 trials (grey higlight)
Finally, protein hits were analyzed for their cellular localization (column C: N- Nucleus, C- Cytoplasm, M- Mitochondria, Mem- Membrane, ER- Endoplasmic reticulum, N/A- not available)
Protein names	Gene names	Localization	Trial 1- No protein	Trial 1- WT	Trial 1- MUT	Trial 1- MUT+SAHA	HD1 WT	HD1 Mutant	HD1 Mutant+SAHA	WT norm	MT norm	MT +SA norm	Trial 1- IgG/WT	Trial 1- MT/WT	Trial 1- MT/SAHA	Trial 2- No protein	Trial 2- WT	Trial 2- MUT	Trial 2- MUT+SAHA	HD1 WT	HD1 MUT	HD1 MUT+SAHA	WT norm	MT norm	MT + SA norm	Trial 2- IgG/WT	Trial 2- MT/WT	Trial 2- MT/SAHA	Trial 4- No protein	Trial 4- WT	Trial 4- MUT	Trial 4- MUT+SAHA	HD1 WT	HD1 Mutant	HD1 Mutant+SAHA	WT norm	MT norm	MT +SA norm	Trial 4- IgG/WT	Trial 4- MT/WT	Trial 4- MT/SAHA	Trial 5- No protein	Trial 5- WT	Trial 5- MUT	Trial 5- MUT+SAHA	HD1 WT	HD1 Mutant	HD1 Mutant+SAHA	WT norm
Plasminogen activator inhibitor 1 RNA-binding protein	SERBP1	N/C	0	0	0	1681200	865460000	887390000	995240000	0	0	0.00168924	0	0	0	0	7867700	22046000	2385300	876600000	1078500000	1138700000	0.00897525	0.0204414	0.00209476	0	9.75834	2.27753	0	0	10121000	2374400	234260000	547210000	689590000	0	0.0184956	0.00344321	0	5.37163	∞	4874500	46543000	45376000	47210000	747130000	737750000	625580000	0.0622957
Transaldolase	TALDO1	C	0	1086400	0	6708900	865460000	887390000	995240000	0.00125529	0	0.00674099	0	0	0	0	6003900	26828000	0	876600000	1078500000	1138700000	0.00684908	0.0248753	0	0	∞	3.63192	0	0	0	0	234260000	547210000	689590000	0	0	0	0	0	0	0	0	1605200	176930	747130000	737750000	625580000	0
Metastasis-associated protein MTA3;Metastasis-associated protein MTA1	MTA3;MTA1	N/C	0	0	0	0	865460000	887390000	995240000	0	0	0	0	0	0	0	0	24825000	0	876600000	1078500000	1138700000	0	0.0230181	0	0	∞	∞	0	0	0	0	234260000	547210000	689590000	0	0	0	0	0	0	0	14352000	4038400	18104000	747130000	737750000	625580000	0.0192095
60S ribosomal protein L32	RPL32	C	0	0	0	0	865460000	887390000	995240000	0	0	0	0	0	0	0	0	3933400	0	876600000	1078500000	1138700000	0	0.0036471	0	0	∞	∞	0	0	0	0	234260000	547210000	689590000	0	0	0	0	0	0	7303800	16263000	13291000	25017000	747130000	737750000	625580000	0.0217673
Mitochondrial 2-oxoglutarate/malate carrier protein	SLC25A11	M	0	0	5424400	0	865460000	887390000	995240000	0	0.00611276	0	0	∞	∞	0	0	9771900	0	876600000	1078500000	1138700000	0	0.00906064	0	0	∞	∞	13067000	0	2475700	8934000	234260000	547210000	689590000	0	0.00452422	0.0129555	∞	0.349212	∞	8285400	19537000	25509000	19739000	747130000	737750000	625580000	0.0261494
T-complex protein 1 subunit beta	CCT2	C	3450500	0	100960000	125220000	865460000	887390000	995240000	0	0.113772	0.125819	∞	0.904251	∞	0	59656000	200590000	156600000	876600000	1078500000	1138700000	0.0680538	0.18599	0.137525	0	1.3524	2.73298	21287000	0	5631400	91864000	234260000	547210000	689590000	0	0.0102911	0.133215	∞	0.0772517	∞	24838000	59842000	141000000	95556000	747130000	737750000	625580000	0.0800958
Alpha-1-antitrypsin;Short peptide from AAT	SERPINA1	ER	0	0	12229000	0	865460000	887390000	995240000	0	0.0137809	0	0	∞	∞	0	0	0	0	876600000	1078500000	1138700000	0	0	0	0	0	0	0	0	1131500000	0	234260000	547210000	689590000	0	2.06776	0	0	∞	∞	0	0	0	0	747130000	737750000	625580000	0
40S ribosomal protein S5;40S ribosomal protein S5, N-terminally processed	RPS5	C	0	0	0	0	865460000	887390000	995240000	0	0	0	0	0	0	0	0	12819000	6480600	876600000	1078500000	1138700000	0	0.011886	0.00569123	0	2.08847	∞	0	16580000	0	0	234260000	547210000	689590000	0.0707761	0	0	0	0	0	5312200	7041600	0	0	747130000	737750000	625580000	0.00942487
Glutathione S-transferase P	GSTP1	N/C	0	15950000	10893000	0	865460000	887390000	995240000	0.0184295	0.0122753	0	0	∞	0.666069	0	30776000	0	0	876600000	1078500000	1138700000	0.0351084	0	0	0	0	0	0	0	1444200	0	234260000	547210000	689590000	0	0.00263921	0	0	∞	∞	2904200	4227400	9893500	8946200	747130000	737750000	625580000	0.00565819
60S ribosomal protein L28	RPL28	C	0	4124300	30064000	0	865460000	887390000	995240000	0.00476544	0.0338791	0	0	∞	7.10934	0	0	23040000	0	876600000	1078500000	1138700000	0	0.021363	0	0	∞	∞	0	5002500	8453800	0	234260000	547210000	689590000	0.0213545	0.0154489	0	0	∞	0.723451	3404400	0	283010	529300	747130000	737750000	625580000	0
Peptidyl-prolyl cis-trans isomerase A;Peptidyl-prolyl cis-trans isomerase A, N-terminally processed;Peptidyl-prolyl cis-trans isomerase A-like 4A/B/C;Peptidyl-prolyl cis-trans isomerase A-like 4D	PPIA;PPIAL4F;PPIAL4A;PPIAL4D	C	28479000	0	0	12741000	865460000	887390000	995240000	0	0	0.0128019	∞	0	0	0	14026000	48411000	17712000	876600000	1078500000	1138700000	0.0160005	0.0448873	0.0155546	0	2.8858	2.80538	0	0	18672000	0	234260000	547210000	689590000	0	0.0341222	0	0	∞	∞	36371000	14379000	29967000	17542000	747130000	737750000	625580000	0.0192456
T-complex protein 1 subunit zeta	CCT6A	C	0	0	68930000	0	865460000	887390000	995240000	0	0.0776772	0	0	∞	∞	0	17215000	10932000	17767000	876600000	1078500000	1138700000	0.0196384	0.0101363	0.0156029	0	0.649643	0.516148	0	0	3562900	20774000	234260000	547210000	689590000	0	0.00651103	0.0301251	0	0.216133	∞	11397000	67793000	68732000	65004000	747130000	737750000	625580000	0.0907379
60S ribosomal protein L18	RPL18	C	0	0	8421200	0	865460000	887390000	995240000	0	0.00948985	0	0	∞	∞	0	0	7608900	0	876600000	1078500000	1138700000	0	0.00705508	0	0	∞	∞	62792000	20388000	0	0	234260000	547210000	689590000	0.0870315	0	0	3.07985	0	0	61582000	142770000	65714000	45578000	747130000	737750000	625580000	0.191091
Calreticulin	CALR	ER	0	0	0	0	865460000	887390000	995240000	0	0	0	0	0	0	0	2180000	0	0	876600000	1078500000	1138700000	0.00248688	0	0	0	0	0	0	0	0	0	234260000	547210000	689590000	0	0	0	0	0	0	0	0	4586300	0	747130000	737750000	625580000	0
NAD(P)H dehydrogenase [quinone] 1	NQO1	C	0	2825700	0	0	865460000	887390000	995240000	0.00326497	0	0	0	0	0	9116200	0	0	0	876600000	1078500000	1138700000	0	0	0	∞	0	0	0	0	0	0	234260000	547210000	689590000	0	0	0	0	0	0	0	1619400	3552000	1626800	747130000	737750000	625580000	0.00216749
26S protease regulatory subunit 7	PSMC2	C	3802500	0	0	0	865460000	887390000	995240000	0	0	0	∞	0	0	9574900	12774000	0	0	876600000	1078500000	1138700000	0.0145722	0	0	0.749562	0	0	0	12182000	0	0	234260000	547210000	689590000	0.052002	0	0	0	0	0	0	0	6937200	1116400	747130000	737750000	625580000	0
Protein disulfide-isomerase A3	PDIA3	ER	6893400	58232000	59391000	13513000	865460000	887390000	995240000	0.0672844	0.0669277	0.0135776	0.118378	4.92926	0.994698	0	51858000	53736000	16653000	876600000	1078500000	1138700000	0.0591581	0.0498248	0.0146246	0	3.40692	0.84223	0	0	0	0	234260000	547210000	689590000	0	0	0	0	0	0	0	0	8339800	5684500	747130000	737750000	625580000	0
T-complex protein 1 subunit delta	CCT4		0	20644000	43183000	16175000	865460000	887390000	995240000	0.0238532	0.0486629	0.0162524	0	2.99421	2.0401	7811700	0	51123000	31394000	876600000	1078500000	1138700000	0	0.0474019	0.02757	∞	1.71933	∞	0	7605700	13649000	34252000	234260000	547210000	689590000	0.0324669	0.0249429	0.0496701	0	0.502171	0.768256	5210800	30916000	67172000	71763000	747130000	737750000	625580000	0.0413797
T-complex protein 1 subunit gamma	CCT3		17563000	84854000	158620000	124280000	865460000	887390000	995240000	0.098045	0.178749	0.124874	0.206979	1.43143	1.82313	0	47179000	186060000	105450000	876600000	1078500000	1138700000	0.0538204	0.172517	0.0926056	0	1.86293	3.20542	23894000	67235000	95950000	48778000	234260000	547210000	689590000	0.28701	0.175344	0.0707348	0.35538	2.47889	0.610933	5813400	68052000	64158000	59304000	747130000	737750000	625580000	0.0910846
REST corepressor 1;REST corepressor 3	RCOR1;RCOR3		0	0	0	4804800	865460000	887390000	995240000	0	0	0.00482778	0	0	0	0	0	9063400	4370300	876600000	1078500000	1138700000	0	0.00840371	0.00383797	0	2.18962	∞	22000000	0	0	4934700	234260000	547210000	689590000	0	0	0.00715599	∞	0	0	0	5740300	8300500	2826700	747130000	737750000	625580000	0.00768313
Paired amphipathic helix protein Sin3a	SIN3A		0	48203000	42519000	60299000	865460000	887390000	995240000	0.0556964	0.0479147	0.0605874	0	0.790836	0.860283	0	11491000	75954000	24369000	876600000	1078500000	1138700000	0.0131086	0.0704256	0.0214007	0	3.2908	5.37247	0	13228000	4125700	48495000	234260000	547210000	689590000	0.0564672	0.00753952	0.0703244	0	0.107211	0.13352	0	64268000	93240000	64988000	747130000	737750000	625580000	0.0860198
Rho guanine nucleotide exchange factor 10	ARHGEF10		0	0	5691800	4823800	865460000	887390000	995240000	0	0.00641409	0.00484687	0	1.32335	∞	0	9777700	0	0	876600000	1078500000	1138700000	0.0111541	0	0	0	0	0	0	0	0	2650000	234260000	547210000	689590000	0	0	0.00384286	0	0	0	0	0	0	0	747130000	737750000	625580000	0
S-adenosylmethionine synthase isoform type-2	MAT2A		13672000	0	0	0	865460000	887390000	995240000	0	0	0	∞	0	0	0	0	16233000	0	876600000	1078500000	1138700000	0	0.0150515	0	0	∞	∞	41921000	0	5202200	7855300	234260000	547210000	689590000	0	0.00950677	0.0113913	∞	0.834567	∞	6200500	0	8479000	0	747130000	737750000	625580000	0
Ribose-phosphate pyrophosphokinase 1;Ribose-phosphate pyrophosphokinase 3;Ribose-phosphate pyrophosphokinase 2	PRPS1;PRPS1L1;PRPS2		0	0	17602000	0	865460000	887390000	995240000	0	0.0198357	0	0	∞	∞	14365000	3616400	0	12963000	876600000	1078500000	1138700000	0.00412548	0	0.011384	3.97218	0	0	0	0	0	2731100	234260000	547210000	689590000	0	0	0.00396047	0	0	0	5057300	903600	837930	397150	747130000	737750000	625580000	0.00120943
Methyl-CpG-binding domain protein 3	MBD3		0	0	26703000	3356700	865460000	887390000	995240000	0	0.0300916	0.00337275	0	8.92197	∞	0	0	0	5377800	876600000	1078500000	1138700000	0	0	0.00472275	0	0	0	0	0	0	0	234260000	547210000	689590000	0	0	0	0	0	0	0	7102500	8451900	7460200	747130000	737750000	625580000	0.00950638
60S ribosomal protein L34	RPL34		0	0	39114000	12597000	865460000	887390000	995240000	0	0.0440776	0.0126572	0	3.4824	∞	0	22277000	15026000	29544000	876600000	1078500000	1138700000	0.025413	0.0139323	0.0259454	0	0.536986	0.548237	0	0	0	7164400	234260000	547210000	689590000	0	0	0.0103894	0	0	0	19129000	16888000	19945000	18986000	747130000	737750000	625580000	0.0226038
T-complex protein 1 subunit epsilon	CCT5		0	35229000	6784200	56961000	865460000	887390000	995240000	0.0407055	0.00764512	0.0572334	0	0.133578	0.187815	30789000	60363000	108970000	30625000	876600000	1078500000	1138700000	0.0688604	0.101038	0.0268947	0.510064	3.75682	1.4673	8195100	24070000	0	96856000	234260000	547210000	689590000	0.102749	0	0.140454	0.340469	0	0	8215800	49120000	60591000	52055000	747130000	737750000	625580000	0.0657449
60S ribosomal protein L35a	RPL35A		33707000	9503000	33904000	0	865460000	887390000	995240000	0.0109803	0.0382064	0	3.54699	∞	3.47955	0	0	9112200	0	876600000	1078500000	1138700000	0	0.00844896	0	0	∞	∞	0	0	0	0	234260000	547210000	689590000	0	0	0	0	0	0	22638000	18764000	25697000	24153000	747130000	737750000	625580000	0.0251148
Putative 60S ribosomal protein L13a protein RPL13AP3;60S ribosomal protein L13a	RPL13AP3;RPL13A		0	0	7164600	0	865460000	887390000	995240000	0	0.00807379	0	0	∞	∞	0	0	0	0	876600000	1078500000	1138700000	0	0	0	0	0	0	0	0	0	0	234260000	547210000	689590000	0	0	0	0	0	0	9906400	27363000	26495000	19576000	747130000	737750000	625580000	0.0366241
Histone-binding protein RBBP4	RBBP4		0	15489000	63904000	27668000	865460000	887390000	995240000	0.0178968	0.0720134	0.0278003	0	2.59038	4.02381	11050000	13859000	19565000	54353000	876600000	1078500000	1138700000	0.0158099	0.0181409	0.0477325	0.797316	0.380054	1.14744	4376000	0	39471000	90359000	234260000	547210000	689590000	0	0.0721314	0.131033	∞	0.550483	∞	0	16719000	16840000	15375000	747130000	737750000	625580000	0.0223776
Histone H2A type 2-C;Histone H2A type 2-A	HIST2H2AC;HIST2H2AA3		5068000	242660000	28175000	34114000	865460000	887390000	995240000	0.280383	0.0317504	0.0342772	0.0208852	0.926285	0.11324	14196000	39819000	84567000	67813000	876600000	1078500000	1138700000	0.0454244	0.0784117	0.059553	0.356513	1.31667	1.7262	0	39569000	0	0	234260000	547210000	689590000	0.168911	0	0	0	0	0	57095000	82681000	65554000	125530000	747130000	737750000	625580000	0.110665
Protein diaphanous homolog 3	DIAPH3		75667000	253540000	127010000	0	865460000	887390000	995240000	0.292954	0.143128	0	0.298442	∞	0.488567	0	0	54352000	12603000	876600000	1078500000	1138700000	0	0.0503959	0.0110679	0	4.55335	∞	0	0	0	104350000	234260000	547210000	689590000	0	0	0.151322	0	0	0	123150000	86670000	200270000	173810000	747130000	737750000	625580000	0.116004
Eukaryotic translation initiation factor 2 subunit 2	EIF2S2		0	0	0	0	865460000	887390000	995240000	0	0	0	0	0	0	0	0	0	0	876600000	1078500000	1138700000	0	0	0	0	0	0	0	0	0	0	234260000	547210000	689590000	0	0	0	0	0	0	0	4753400	10266000	6803000	747130000	737750000	625580000	0.00636221
DnaJ homolog subfamily B member 6;DnaJ homolog subfamily B member 3;DnaJ homolog subfamily B member 8;DnaJ homolog subfamily B member 2	DNAJB6;DNAJB3;DNAJB8;DNAJB2		0	0	0	0	865460000	887390000	995240000	0	0	0	0	0	0	0	0	0	0	876600000	1078500000	1138700000	0	0	0	0	0	0	0	0	0	0	234260000	547210000	689590000	0	0	0	0	0	0	0	2666800	8547400	6791800	747130000	737750000	625580000	0.00356939
WD repeat-containing protein 26	WDR26		0	59511000	0	20596000	865460000	887390000	995240000	0.0687623	0	0.0206945	0	0	0	0	55082000	40393000	43275000	876600000	1078500000	1138700000	0.062836	0.0374529	0.0380039	0	0.985504	0.596043	11393000	16945000	14755000	17261000	234260000	547210000	689590000	0.0723342	0.0269641	0.0250308	0.672352	1.07723	0.372771	0	10374000	21148000	10253000	747130000	737750000	625580000	0.0138851
T-complex protein 1 subunit eta	CCT7		3309300	43198000	43328000	102440000	865460000	887390000	995240000	0.0499133	0.0488263	0.10293	0.0766077	0.474365	0.978222	10206000	63148000	111210000	160000000	876600000	1078500000	1138700000	0.0720374	0.103115	0.140511	0.16162	0.73386	1.43141	0	0	19611000	57008000	234260000	547210000	689590000	0	0.0358382	0.0826694	0	0.433512	∞	3598700	45278000	56788000	43944000	747130000	737750000	625580000	0.0606026
U4/U6 small nuclear ribonucleoprotein Prp31	PRPF31		0	24709000	58277000	8115700	865460000	887390000	995240000	0.0285501	0.0656724	0.00815452	0	8.0535	2.30025	16638000	49524000	33282000	12691000	876600000	1078500000	1138700000	0.0564956	0.0308595	0.0111452	0.335958	2.76887	0.546229	0	36025000	26596000	20344000	234260000	547210000	689590000	0.153782	0.0486029	0.0295016	0	1.64747	0.31605	9715500	35502000	63726000	45676000	747130000	737750000	625580000	0.0475178
26S proteasome non-ATPase regulatory subunit 6	PSMD6		0	0	0	0	865460000	887390000	995240000	0	0	0	0	0	0	0	0	7615000	0	876600000	1078500000	1138700000	0	0.00706073	0	0	∞	∞	0	0	0	0	234260000	547210000	689590000	0	0	0	0	0	0	0	0	0	0	747130000	737750000	625580000	0
Elongation factor 1-delta	EEF1D		0	0	0	2928200	865460000	887390000	995240000	0	0	0.0029422	0	0	0	0	0	9114300	7603600	876600000	1078500000	1138700000	0	0.0084509	0.00667744	0	1.26559	∞	0	0	0	0	234260000	547210000	689590000	0	0	0	0	0	0	0	0	0	0	747130000	737750000	625580000	0
Isocitrate dehydrogenase [NADP] cytoplasmic	IDH1		0	0	0	0	865460000	887390000	995240000	0	0	0	0	0	0	0	0	0	0	876600000	1078500000	1138700000	0	0	0	0	0	0	0	0	6404300	0	234260000	547210000	689590000	0	0.0117036	0	0	∞	∞	0	0	0	0	747130000	737750000	625580000	0
Junction plakoglobin	JUP		0	0	0	0	865460000	887390000	995240000	0	0	0	0	0	0	0	0	0	0	876600000	1078500000	1138700000	0	0	0	0	0	0	0	0	8456200	0	234260000	547210000	689590000	0	0.0154533	0	0	∞	∞	0	0	0	0	747130000	737750000	625580000	0
Putative ciliary rootlet coiled-coil protein-like 3 protein			13126000	0	15388000	31922000	865460000	887390000	995240000	0	0.0173407	0.0320747	∞	0.540637	∞	0	0	36365000	28392000	876600000	1078500000	1138700000	0	0.0337181	0.0249337	0	1.35231	∞	39105000	0	31008000	49234000	234260000	547210000	689590000	0	0.0566656	0.071396	∞	0.79368	∞	0	0	0	0	747130000	737750000	625580000	0
Ig gamma-1 chain C region;Ig gamma-4 chain C region;Ig gamma-3 chain C region	IGHG1;IGHG4;IGHG3		0	10570000	0	0	865460000	887390000	995240000	0.0122132	0	0	0	0	0	0	0	0	0	876600000	1078500000	1138700000	0	0	0	0	0	0	0	0	154060000	0	234260000	547210000	689590000	0	0.281537	0	0	∞	∞	0	0	0	0	747130000	737750000	625580000	0
Alpha-1-antichymotrypsin;Alpha-1-antichymotrypsin His-Pro-less	SERPINA3		0	0	0	0	865460000	887390000	995240000	0	0	0	0	0	0	0	0	0	0	876600000	1078500000	1138700000	0	0	0	0	0	0	0	0	82930000	0	234260000	547210000	689590000	0	0.151551	0	0	∞	∞	0	0	0	0	747130000	737750000	625580000	0
Alpha-2-macroglobulin	A2M		0	0	0	0	865460000	887390000	995240000	0	0	0	0	0	0	0	0	0	0	876600000	1078500000	1138700000	0	0	0	0	0	0	0	0	223970000	0	234260000	547210000	689590000	0	0.409294	0	0	∞	∞	0	0	0	0	747130000	737750000	625580000	0
Putative oxidoreductase GLYR1	GLYR1		0	0	0	14985000	865460000	887390000	995240000	0	0	0.0150567	0	0	0	0	26311000	0	14357000	876600000	1078500000	1138700000	0.0300148	0	0.0126082	0	0	0	0	23211000	0	14026000	234260000	547210000	689590000	0.0990822	0	0.0203396	0	0	0	1104500	0	1948400	1703300	747130000	737750000	625580000	0
Putative pre-mRNA-splicing factor ATP-dependent RNA helicase DHX15	DHX15		0	0	0	0	865460000	887390000	995240000	0	0	0	0	0	0	0	0	0	0	876600000	1078500000	1138700000	0	0	0	0	0	0	0	0	0	0	234260000	547210000	689590000	0	0	0	0	0	0	0	0	0	0	747130000	737750000	625580000	0
Protein odr-4 homolog	ODR4		0	0	0	0	865460000	887390000	995240000	0	0	0	0	0	0	0	0	0	0	876600000	1078500000	1138700000	0	0	0	0	0	0	0	0	0	0	234260000	547210000	689590000	0	0	0	0	0	0	1301700	0	0	3760900	747130000	737750000	625580000	0
Splicing factor U2AF 26 kDa subunit;Splicing factor U2AF 35 kDa subunit	U2AF1L4;U2AF1		0	0	0	0	865460000	887390000	995240000	0	0	0	0	0	0	8835100	0	0	0	876600000	1078500000	1138700000	0	0	0	∞	0	0	0	0	0	0	234260000	547210000	689590000	0	0	0	0	0	0	2329600	2779300	0	0	747130000	737750000	625580000	0.00371997
GTP-binding nuclear protein Ran	RAN		0	0	0	0	865460000	887390000	995240000	0	0	0	0	0	0	12856000	11816000	6205000	6393200	876600000	1078500000	1138700000	0.0134794	0.00575336	0.00561447	1.08802	1.02474	0.426828	0	1686700	0	0	234260000	547210000	689590000	0.00720012	0	0	0	0	0	2235400	0	0	0	747130000	737750000	625580000	0
Calmodulin-like protein 5	CALML5		0	0	0	0	865460000	887390000	995240000	0	0	0	0	0	0	0	0	0	0	876600000	1078500000	1138700000	0	0	0	0	0	0	0	0	0	0	234260000	547210000	689590000	0	0	0	0	0	0	0	0	0	0	747130000	737750000	625580000	0
Complement C3;Complement C3 beta chain;C3-beta-c;Complement C3 alpha chain;C3a anaphylatoxin;Acylation stimulating protein;Complement C3b alpha chain;Complement C3c alpha chain fragment 1;Complement C3dg fragment;Complement C3g fragment;Complement C3d fragment;Complement C3f fragment;Complement C3c alpha chain fragment 2	C3		11344000	32370000	0	0	865460000	887390000	995240000	0.0374021	0	0	0.350448	0	0	21270000	37468000	15120000	1130200	876600000	1078500000	1138700000	0.0427424	0.0140195	0.000992535	0.567684	14.1249	0.327999	18277000	0	95292000	0	234260000	547210000	689590000	0	0.174142	0	∞	∞	∞	4151800	5164800	5934500	4404400	747130000	737750000	625580000	0.00691285
Cleavage and polyadenylation specificity factor subunit 5	NUDT21		0	0	0	0	865460000	887390000	995240000	0	0	0	0	0	0	0	0	0	0	876600000	1078500000	1138700000	0	0	0	0	0	0	0	0	0	0	234260000	547210000	689590000	0	0	0	0	0	0	7275100	5947300	6446300	4830600	747130000	737750000	625580000	0.00796019
40S ribosomal protein S13	RPS13		0	0	0	0	865460000	887390000	995240000	0	0	0	0	0	0	0	0	0	9702500	876600000	1078500000	1138700000	0	0	0.00852068	0	0	0	0	0	0	0	234260000	547210000	689590000	0	0	0	0	0	0	0	5093300	5039700	0	747130000	737750000	625580000	0.00681715
Moesin;Radixin;Ezrin	MSN;RDX;EZR		0	0	0	0	865460000	887390000	995240000	0	0	0	0	0	0	0	0	11870000	0	876600000	1078500000	1138700000	0	0.011006	0	0	∞	∞	0	0	0	0	234260000	547210000	689590000	0	0	0	0	0	0	5762300	0	4449500	4549900	747130000	737750000	625580000	0
Malate dehydrogenase, mitochondrial	MDH2		0	0	0	0	865460000	887390000	995240000	0	0	0	0	0	0	0	0	0	0	876600000	1078500000	1138700000	0	0	0	0	0	0	0	0	0	0	234260000	547210000	689590000	0	0	0	0	0	0	9972700	1122000	13462000	8313100	747130000	737750000	625580000	0.00150175
Stress-induced-phosphoprotein 1	STIP1		0	0	0	0	865460000	887390000	995240000	0	0	0	0	0	0	0	0	15960000	8528800	876600000	1078500000	1138700000	0	0.0147983	0.00748994	0	1.97576	∞	0	0	0	0	234260000	547210000	689590000	0	0	0	0	0	0	2751200	2685300	7673600	10703000	747130000	737750000	625580000	0.00359415
14-3-3 protein gamma;14-3-3 protein gamma, N-terminally processed	YWHAG		11404000	10247000	0	0	865460000	887390000	995240000	0.0118399	0	0	1.11291	0	0	21177000	0	7477800	0	876600000	1078500000	1138700000	0	0.00693352	0	∞	∞	∞	12689000	9455100	2628000	0	234260000	547210000	689590000	0.0403616	0.00480254	0	1.34203	∞	0.118988	0	2112200	0	2111000	747130000	737750000	625580000	0.00282708
40S ribosomal protein S18	RPS18		4276600	14917000	0	0	865460000	887390000	995240000	0.0172359	0	0	0.286693	0	0	35555000	23510000	0	0	876600000	1078500000	1138700000	0.0268195	0	0	1.51234	0	0	0	0	0	0	234260000	547210000	689590000	0	0	0	0	0	0	8758000	5756000	10581000	7096100	747130000	737750000	625580000	0.00770415
40S ribosomal protein S15a	RPS15A		0	0	0	0	865460000	887390000	995240000	0	0	0	0	0	0	9886900	0	0	0	876600000	1078500000	1138700000	0	0	0	∞	0	0	0	0	0	0	234260000	547210000	689590000	0	0	0	0	0	0	1815400	3069400	3206900	5418300	747130000	737750000	625580000	0.00410825
Constitutive coactivator of PPAR-gamma-like protein 1;Putative uncharacterized protein C9orf129	FAM120A;C9orf129		0	0	13748000	0	865460000	887390000	995240000	0	0.0154926	0	0	∞	∞	0	6957000	7093400	5910200	876600000	1078500000	1138700000	0.00793634	0.0065771	0.0051903	0	1.26719	0.828731	0	10042000	18344000	0	234260000	547210000	689590000	0.0428669	0.0335228	0	0	∞	0.78202	1170600	3065400	1914500	2708000	747130000	737750000	625580000	0.0041029
26S proteasome non-ATPase regulatory subunit 1	PSMD1		0	0	0	0	865460000	887390000	995240000	0	0	0	0	0	0	4622000	0	0	0	876600000	1078500000	1138700000	0	0	0	∞	0	0	0	0	0	0	234260000	547210000	689590000	0	0	0	0	0	0	0	0	0	0	747130000	737750000	625580000	0
Eukaryotic translation initiation factor 3 subunit F	EIF3F		0	7088600	0	3750100	865460000	887390000	995240000	0.00819056	0	0.00376804	0	0	0	0	0	5720400	3912200	876600000	1078500000	1138700000	0	0.00530403	0.00343567	0	1.54381	∞	22311000	7026000	0	0	234260000	547210000	689590000	0.0299923	0	0	3.17549	0	0	8748000	4379400	3695800	5949300	747130000	737750000	625580000	0.00586163
Protein arginine N-methyltransferase 1	PRMT1		0	0	0	0	865460000	887390000	995240000	0	0	0	0	0	0	0	0	10631000	0	876600000	1078500000	1138700000	0	0.00985721	0	0	∞	∞	0	0	0	0	234260000	547210000	689590000	0	0	0	0	0	0	8156500	0	0	0	747130000	737750000	625580000	0
40S ribosomal protein S14	RPS14		6895500	0	0	0	865460000	887390000	995240000	0	0	0	∞	0	0	41027000	3508500	21255000	0	876600000	1078500000	1138700000	0.0040024	0.0197079	0	11.6936	∞	4.92403	0	0	0	0	234260000	547210000	689590000	0	0	0	0	0	0	7695500	8696300	0	3425800	747130000	737750000	625580000	0.0116396
40S ribosomal protein S11	RPS11		0	0	0	0	865460000	887390000	995240000	0	0	0	0	0	0	0	0	0	0	876600000	1078500000	1138700000	0	0	0	0	0	0	0	0	0	0	234260000	547210000	689590000	0	0	0	0	0	0	3556800	5448700	4501900	4143500	747130000	737750000	625580000	0.00729284
40S ribosomal protein S20	RPS20		0	31810000	0	0	865460000	887390000	995240000	0.036755	0	0	0	0	0	19213000	8758400	7853200	6309500	876600000	1078500000	1138700000	0.00999133	0.00728159	0.00554097	2.19367	1.31414	0.728791	0	0	0	0	234260000	547210000	689590000	0	0	0	0	0	0	13488000	4879400	8765500	7311700	747130000	737750000	625580000	0.00653086
Reticulon-3	RTN3		0	0	0	0	865460000	887390000	995240000	0	0	0	0	0	0	0	7822200	0	0	876600000	1078500000	1138700000	0.00892334	0	0	0	0	0	0	0	0	0	234260000	547210000	689590000	0	0	0	0	0	0	3057200	0	7604300	5601000	747130000	737750000	625580000	0
Serpin H1	SERPINH1		0	0	0	23040000	865460000	887390000	995240000	0	0	0.0231502	0	0	0	0	0	0	11461000	876600000	1078500000	1138700000	0	0	0.010065	0	0	0	11336000	0	0	0	234260000	547210000	689590000	0	0	0	∞	0	0	0	8587500	7544200	6488800	747130000	737750000	625580000	0.011494
Transitional endoplasmic reticulum ATPase	VCP		0	0	0	0	865460000	887390000	995240000	0	0	0	0	0	0	18325000	0	0	0	876600000	1078500000	1138700000	0	0	0	∞	0	0	0	0	0	0	234260000	547210000	689590000	0	0	0	0	0	0	8101500	3869100	9060200	4805700	747130000	737750000	625580000	0.00517862
60S ribosomal protein L22	RPL22		5256200	0	0	0	865460000	887390000	995240000	0	0	0	∞	0	0	18188000	15730000	8208100	10503000	876600000	1078500000	1138700000	0.0179443	0.00761066	0.00922368	1.15626	0.825123	0.424126	0	0	0	0	234260000	547210000	689590000	0	0	0	0	0	0	5888300	5656200	11696000	11742000	747130000	737750000	625580000	0.00757057
Dynein light chain 1, cytoplasmic;Dynein light chain 2, cytoplasmic	DYNLL1;DYNLL2		21681000	11241000	15619000	0	865460000	887390000	995240000	0.0129885	0.0176011	0	1.92874	∞	1.35513	47439000	17108000	0	0	876600000	1078500000	1138700000	0.0195163	0	0	2.77291	0	0	0	0	0	0	234260000	547210000	689590000	0	0	0	0	0	0	7546600	9089300	10888000	15747000	747130000	737750000	625580000	0.0121656
Importin subunit alpha-3	KPNA4		0	0	5850800	0	865460000	887390000	995240000	0	0.00659327	0	0	∞	∞	0	0	0	2274800	876600000	1078500000	1138700000	0	0	0.00199772	0	0	0	0	0	0	2792600	234260000	547210000	689590000	0	0	0.00404965	0	0	0	918010	8848800	10024000	7493100	747130000	737750000	625580000	0.0118437
40S ribosomal protein S16	RPS16		21651000	0	9213800	16169000	865460000	887390000	995240000	0	0.010383	0.0162463	∞	0.6391	∞	61833000	0	25914000	15090000	876600000	1078500000	1138700000	0	0.0240278	0.013252	∞	1.81315	∞	13968000	13263000	0	18069000	234260000	547210000	689590000	0.0566166	0	0.0262025	1.05316	0	0	23700000	12057000	12111000	19414000	747130000	737750000	625580000	0.0161378
Tubulin beta-8 chain	TUBB8		0	0	0	0	865460000	887390000	995240000	0	0	0	0	0	0	0	0	0	0	876600000	1078500000	1138700000	0	0	0	0	0	0	0	0	0	0	234260000	547210000	689590000	0	0	0	0	0	0	18674000	21130000	0	18233000	747130000	737750000	625580000	0.0282816
Galectin-1	LGALS1		24293000	0	13150000	25104000	865460000	887390000	995240000	0	0.0148187	0.0252241	∞	0.587484	∞	0	0	105830000	63350000	876600000	1078500000	1138700000	0	0.098127	0.0556336	0	1.76381	∞	16243000	29317000	27356000	42513000	234260000	547210000	689590000	0.125147	0.0499918	0.0616497	0.554047	0.810901	0.399464	36502000	17885000	40117000	38844000	747130000	737750000	625580000	0.0239383
3-hydroxyanthranilate 3,4-dioxygenase	HAAO		0	0	145800000	0	865460000	887390000	995240000	0	0.164302	0	0	∞	∞	542370000	544660000	205820000	0	876600000	1078500000	1138700000	0.621332	0.190839	0	0.995796	∞	0.307145	0	276400000	650120000	397460000	234260000	547210000	689590000	1.17989	1.18806	0.576371	0	2.06128	1.00693	165950000	25784000	26805000	24351000	747130000	737750000	625580000	0.0345107
Nuclease-sensitive element-binding protein 1	YBX1		17357000	3788000	0	0	865460000	887390000	995240000	0.00437686	0	0	4.5821	0	0	2437900	13471000	47021000	1500700	876600000	1078500000	1138700000	0.0153673	0.0435985	0.00131791	0.180974	33.0816	2.83709	0	0	0	0	234260000	547210000	689590000	0	0	0	0	0	0	24346000	20528000	18518000	14789000	747130000	737750000	625580000	0.0274758
Reticulocalbin-2	RCN2		44336000	60424000	46314000	7194300	865460000	887390000	995240000	0.0698172	0.0521913	0.00722871	0.733748	7.22	0.747541	28379000	27400000	25054000	6180400	876600000	1078500000	1138700000	0.0312571	0.0232304	0.00542759	1.03573	4.28006	0.743204	0	0	11647000	6516700	234260000	547210000	689590000	0	0.0212843	0.00945011	0	2.25228	∞	46088000	23535000	41504000	28820000	747130000	737750000	625580000	0.0315005
60S ribosomal protein L18a	RPL18A		39731000	61817000	0	6506700	865460000	887390000	995240000	0.0714268	0	0.00653782	0.64272	0	0	144490000	24967000	0	0	876600000	1078500000	1138700000	0.0284816	0	0	5.78724	0	0	40087000	8002300	11793000	0	234260000	547210000	689590000	0.0341599	0.0215511	0	5.00943	∞	0.63089	0	39951000	63998000	65494000	747130000	737750000	625580000	0.0534726
Melanoma inhibitory activity protein 3	MIA3		0	0	0	0	865460000	887390000	995240000	0	0	0	0	0	0	0	0	65219000	36626000	876600000	1078500000	1138700000	0	0.060472	0.0321647	0	1.88007	∞	0	0	0	7548600	234260000	547210000	689590000	0	0	0.0109465	0	0	0	20124000	30969000	39051000	35053000	747130000	737750000	625580000	0.0414506
Vimentin	VIM		0	34960000	0	10764000	865460000	887390000	995240000	0.0403947	0	0.0108155	0	0	0	0	0	0	0	876600000	1078500000	1138700000	0	0	0	0	0	0	0	42686000	8263100	11665000	234260000	547210000	689590000	0.182216	0.0151004	0.0169158	0	0.892679	0.0828708	20677000	45252000	45314000	53765000	747130000	737750000	625580000	0.0605678
Myosin phosphatase Rho-interacting protein	MPRIP		28249000	54046000	2108800	0	865460000	887390000	995240000	0.0624477	0.00237641	0	0.522684	∞	0.0380543	41022000	13046000	21914000	5642100	876600000	1078500000	1138700000	0.0148825	0.020319	0.00495486	3.14441	4.10081	1.36529	0	0	60857000	74577000	234260000	547210000	689590000	0	0.111213	0.108147	0	1.02835	∞	56635000	21626000	18997000	15927000	747130000	737750000	625580000	0.0289454
Histone H2B type 1-L;Histone H2B type 1-M;Histone H2B type 1-N;Histone H2B type 1-H;Histone H2B type 2-F;Histone H2B type 1-C/E/F/G/I;Histone H2B type 1-D;Histone H2B type F-S;Histone H2B type 1-K;Histone H2B type 3-B;Histone H2B type 2-E;Histone H2B type 1-B;Histone H2B type 1-O;Histone H2B type 1-J;Histone H2B type 1-A	HIST1H2BL;HIST1H2BM;HIST1H2BN;HIST1H2BH;HIST2H2BF;HIST1H2BC;HIST1H2BD;H2BFS;HIST1H2BK;HIST3H2BB;HIST2H2BE;HIST1H2BB;HIST1H2BO;HIST1H2BJ;HIST1H2BA		11416000	195710000	151590	62792000	865460000	887390000	995240000	0.226134	0.000170827	0.0630923	0.0583312	0.00270757	0.000755423	22345000	127430000	69253000	88474000	876600000	1078500000	1138700000	0.145368	0.0642123	0.0776974	0.175351	0.826441	0.441721	52571000	73703000	12070000	0	234260000	547210000	689590000	0.314621	0.0220573	0	0.713282	∞	0.0701078	47596000	78687000	63131000	85509000	747130000	737750000	625580000	0.105319
Actin-related protein 2/3 complex subunit 5-like protein	ARPC5L		0	120590000	33564000	83004000	865460000	887390000	995240000	0.139336	0.0378233	0.083401	0	0.453511	0.271453	47421000	125380000	109500000	103860000	876600000	1078500000	1138700000	0.14303	0.10153	0.0912093	0.378218	1.11315	0.709851	75975000	20010000	29419000	24741000	234260000	547210000	689590000	0.0854179	0.0537618	0.0358778	3.79685	1.49847	0.629397	60859000	99996000	124740000	153890000	747130000	737750000	625580000	0.13384
Myosin light chain 1/3, skeletal muscle isoform;Myosin light chain 3	MYL1;MYL3		99770000	62193000	94035000	21360000	865460000	887390000	995240000	0.0718612	0.105968	0.0214622	1.6042	4.93744	1.47462	0	0	150920000	50968000	876600000	1078500000	1138700000	0	0.139935	0.0447598	0	3.12636	∞	0	3534600	0	20611000	234260000	547210000	689590000	0.0150884	0	0.0298888	0	0	0	614960000	98235000	84342000	73607000	747130000	737750000	625580000	0.131483
Annexin A1	ANXA1		376320000	1564200000	436770000	635930000	865460000	887390000	995240000	1.80736	0.492196	0.638972	0.240583	0.770294	0.272328	1255900000	1603600000	1011400000	669090000	876600000	1078500000	1138700000	1.82934	0.937784	0.587591	0.783175	1.59598	0.512635	781900000	573820000	231400000	600120000	234260000	547210000	689590000	2.4495	0.422872	0.870256	1.36262	0.485917	0.172636	125330000	478690000	668810000	572900000	747130000	737750000	625580000	0.640705
Vacuolar protein sorting-associated protein 33B	VPS33B		20054000	35166000	0	16970000	865460000	887390000	995240000	0.0406327	0	0.0170512	0.570267	0	0	34447000	28097000	32602000	16308000	876600000	1078500000	1138700000	0.0320522	0.030229	0.0143216	1.226	2.11073	0.943117	98232000	37263000	26372000	0	234260000	547210000	689590000	0.159067	0.0481936	0	2.63618	∞	0.302977	6392000	10156000	26233000	7068600	747130000	737750000	625580000	0.0135934
Unconventional myosin-IXb	MYO9B		8917100	59884000	18228000	3556600	865460000	887390000	995240000	0.0691933	0.0205411	0.00357361	#NAME?	#NAME?	#NAME?	34874000	67654000	60925000	24357000	876600000	1078500000	1138700000	0.0771777	0.0564905	0.0213902	#NAME?	#NAME?	#NAME?	0	0	0	0	234260000	547210000	689590000	0	0	0	0	0	0	0	0	1098300	0	747130000	737750000	625580000	0
Dedicator of cytokinesis protein 4	DOCK4		5072800	30739000	0	25272000	865460000	887390000	995240000	0.0355175	0	0.0253929	0.165028	0	0	102350000	31654000	0	25999000	876600000	1078500000	1138700000	0.03611	0	0.0228322	3.2334	0	0	38554000	28953000	0	10518000	234260000	547210000	689590000	0.123593	0	0.0152525	1.33161	0	0	10334000	10377000	21455000	13350000	747130000	737750000	625580000	0.0138891
Proliferating cell nuclear antigen	PCNA		12992000	0	0	0	865460000	887390000	995240000	0	0	0	∞	0	0	0	0	0	0	876600000	1078500000	1138700000	0	0	0	0	0	0	0	0	0	0	234260000	547210000	689590000	0	0	0	0	0	0	2258500	3224000	8978800	4184300	747130000	737750000	625580000	0.00431518
Elongation factor Tu, mitochondrial	TUFM		0	5776700	0	30340000	865460000	887390000	995240000	0.00667472	0	0.0304851	0	0	0	0	6648200	5494900	30680000	876600000	1078500000	1138700000	0.00758407	0.00509495	0.026943	0	0.189101	0.671795	0	28538000	0	0	234260000	547210000	689590000	0.121822	0	0	0	0	0	1752500	4817000	15126000	8194800	747130000	737750000	625580000	0.00644734
Bcl-2-associated transcription factor 1	BCLAF1		0	181410000	101190000	145740000	865460000	887390000	995240000	0.209611	0.114031	0.146437	0	0.778703	0.544012	0	123970000	28864000	125320000	876600000	1078500000	1138700000	0.141421	0.0267631	0.110055	0	0.243179	0.189244	21612000	100530000	27961000	57160000	234260000	547210000	689590000	0.429139	0.0510974	0.0828898	0.214981	0.616449	0.11907	9579700	42903000	89015000	68606000	747130000	737750000	625580000	0.0574237
Myosin-14	MYH14		62916000	706280000	228430000	199950000	865460000	887390000	995240000	0.816075	0.257418	0.200906	0.0890808	1.28128	0.315434	248580000	728270000	179050000	177300000	876600000	1078500000	1138700000	0.830789	0.166018	0.155704	0.341329	1.06624	0.199831	0	384570000	0	148400000	234260000	547210000	689590000	1.64164	0	0.2152	0	0	0	37667000	120020000	249820000	36727000	747130000	737750000	625580000	0.160641
Histone deacetylase 1	HDAC1		21039000	865460000	887390000	995240000	865460000	887390000	995240000	1	1	1	0.0243096	1	1	32520000	876600000	1078500000	1138700000	876600000	1078500000	1138700000	1	1	1	0.0370979	1	1	20785000	234260000	547210000	689590000	234260000	547210000	689590000	1	1	1	0.0887262	1	1	18397000	747130000	737750000	625580000	747130000	737750000	625580000	1
T-complex protein 1 subunit theta	CCT8		0	40696000	50303000	161980000	865460000	887390000	995240000	0.0470224	0.0566865	0.162755	0	0.348294	1.20552	14923000	45878000	92613000	64267000	876600000	1078500000	1138700000	0.0523363	0.085872	0.0564389	0.325276	1.5215	1.64077	43641000	0	37347000	53182000	234260000	547210000	689590000	0	0.0682498	0.0771212	∞	0.884969	∞	4216600	36113000	52364000	41933000	747130000	737750000	625580000	0.0483356
Unconventional myosin-Id	MYO1D		0	440960000	102620000	168340000	865460000	887390000	995240000	0.509509	0.115643	0.169145	0	0.683688	0.226968	28242000	89216000	161570000	105140000	876600000	1078500000	1138700000	0.101775	0.14981	0.0923334	0.316558	1.62249	1.47197	16767000	160470000	14774000	111570000	234260000	547210000	689590000	0.685008	0.0269988	0.161792	0.104487	0.166874	0.0394138	18368000	65212000	114840000	94821000	747130000	737750000	625580000	0.0872833
Little elongation complex subunit 1	ICE1		0	6340200	8660100	4372800	865460000	887390000	995240000	0.00732582	0.00975907	0.00439371	0	2.22114	1.33215	0	1408400	0	0	876600000	1078500000	1138700000	0.00160666	0	0	0	0	0	0	0	0	0	234260000	547210000	689590000	0	0	0	0	0	0	0	1551000	1037300	1471400	747130000	737750000	625580000	0.00207594
Solute carrier family 2, facilitated glucose transporter member 1	SLC2A1		0	15987000	0	0	865460000	887390000	995240000	0.0184723	0	0	0	0	0	0	25303000	26616000	0	876600000	1078500000	1138700000	0.0288649	0.0246787	0	0	∞	0.854972	0	0	0	0	234260000	547210000	689590000	0	0	0	0	0	0	0	6247600	4913400	5373300	747130000	737750000	625580000	0.00836213
Src substrate cortactin	CTTN		0	13903000	0	15375000	865460000	887390000	995240000	0.0160643	0	0.0154485	0	0	0	0	16873000	29669000	7984400	876600000	1078500000	1138700000	0.0192482	0.0275095	0.00701186	0	3.92328	1.4292	0	4671800	0	14382000	234260000	547210000	689590000	0.0199428	0	0.0208559	0	0	0	19083000	15131000	22629000	15290000	747130000	737750000	625580000	0.0202522
Heterogeneous nuclear ribonucleoprotein H2;Heterogeneous nuclear ribonucleoprotein H2, N-terminally processed	HNRNPH2		0	14068000	17076000	25673000	865460000	887390000	995240000	0.0162549	0.0192429	0.0257958	0	0.745972	1.18382	0	6127700	0	0	876600000	1078500000	1138700000	0.0069903	0	0	0	0	0	0	7705200	0	16331000	234260000	547210000	689590000	0.0328917	0	0.0236822	0	0	0	0	44068000	30273000	22571000	747130000	737750000	625580000	0.058983
TOM1-like protein 2	TOM1L2		0	13364000	0	9209700	865460000	887390000	995240000	0.0154415	0	0.00925375	0	0	0	0	13335000	7875500	9071000	876600000	1078500000	1138700000	0.0152122	0.00730227	0.0079661	0	0.916668	0.480028	0	13413000	0	24287000	234260000	547210000	689590000	0.0572569	0	0.0352195	0	0	0	0	37544000	42047000	49491000	747130000	737750000	625580000	0.050251
Target of Myb protein 1	TOM1		0	0	18905000	27510000	865460000	887390000	995240000	0	0.021304	0.0276416	0	0.770725	∞	0	0	25277000	34469000	876600000	1078500000	1138700000	0	0.0234372	0.0302705	0	0.774259	∞	0	53692000	24643000	22405000	234260000	547210000	689590000	0.229198	0.0450339	0.0324903	0	1.38607	0.196484	21384000	92031000	61989000	76432000	747130000	737750000	625580000	0.123179
60S ribosomal protein L7	RPL7		1554800	28846000	46922000	7416400	865460000	887390000	995240000	0.0333303	0.0528764	0.00745187	0.0539	7.09572	1.58644	48727000	43676000	10152000	9854300	876600000	1078500000	1138700000	0.0498243	0.00941307	0.00865399	1.11565	1.08771	0.188925	119870000	18933000	5071400	0	234260000	547210000	689590000	0.0808205	0.00926774	0	6.33127	∞	0.114671	83806000	133270000	142820000	103040000	747130000	737750000	625580000	0.178376
Ubiquitin thioesterase OTUB1	OTUB1		0	0	0	0	865460000	887390000	995240000	0	0	0	0	0	0	0	0	0	9182600	876600000	1078500000	1138700000	0	0	0.00806411	0	0	0	0	0	0	0	234260000	547210000	689590000	0	0	0	0	0	0	0	2292500	2921700	0	747130000	737750000	625580000	0.00306841
Probable ATP-dependent RNA helicase DDX17;Probable ATP-dependent RNA helicase DDX5	DDX17;DDX5		0	14115000	0	7474800	865460000	887390000	995240000	0.0163092	0	0.00751055	0	0	0	14649000	21287000	25169000	9404100	876600000	1078500000	1138700000	0.0242836	0.023337	0.00825863	0.688166	2.82578	0.961021	46146000	0	0	30836000	234260000	547210000	689590000	0	0	0.0447164	∞	0	0	8708100	9919300	15035000	10425000	747130000	737750000	625580000	0.0132765
Methyl-CpG-binding domain protein 2	MBD2		0	0	0	0	865460000	887390000	995240000	0	0	0	0	0	0	0	21307000	0	0	876600000	1078500000	1138700000	0.0243064	0	0	0	0	0	0	18990000	0	8170400	234260000	547210000	689590000	0.0810638	0	0.0118482	0	0	0	4548900	12106000	18347000	14961000	747130000	737750000	625580000	0.0162033
Olfactory receptor 51B4	OR51B4		63810000	45097000	38494000	61737000	865460000	887390000	995240000	0.0521075	0.0433789	0.0620323	1.41495	0.699296	0.832488	163650000	0	120840000	83238000	876600000	1078500000	1138700000	0	0.112045	0.0730991	∞	1.53277	∞	103610000	60358000	18578000	58407000	234260000	547210000	689590000	0.257654	0.0339504	0.0846982	1.71659	0.40084	0.131767	0	33415000	59383000	48901000	747130000	737750000	625580000	0.0447245
MOB kinase activator 2	MOB2		85185000	164710000	104120000	75751000	865460000	887390000	995240000	0.190315	0.117333	0.0761133	0.517182	1.54156	0.616519	161490000	88948000	80857000	80174000	876600000	1078500000	1138700000	0.101469	0.0749717	0.0704084	1.81556	1.06481	0.738861	0	111890000	32478000	134990000	234260000	547210000	689590000	0.477632	0.059352	0.195754	0	0.303197	0.124263	0	48209000	84096000	41160000	747130000	737750000	625580000	0.0645256
T-complex protein 1 subunit alpha	TCP1		22377000	21300000	51621000	108720000	865460000	887390000	995240000	0.0246112	0.0581717	0.10924	1.05056	0.532513	2.36363	32701000	134690000	80614000	84386000	876600000	1078500000	1138700000	0.15365	0.0747464	0.0741073	0.242787	1.00862	0.48647	26021000	11903000	7789100	42204000	234260000	547210000	689590000	0.0508111	0.0142342	0.0612016	2.18609	0.232579	0.28014	27435000	81351000	145370000	109550000	747130000	737750000	625580000	0.108885
Eukaryotic translation initiation factor 4B	EIF4B		105250000	166100000	169530000	20645000	865460000	887390000	995240000	0.191921	0.191043	0.0207437	0.633654	9.20969	0.995427	120580000	106940000	37872000	12690000	876600000	1078500000	1138700000	0.121994	0.0351154	0.0111443	1.12755	3.15098	0.287845	185440000	49908000	33886000	77901000	234260000	547210000	689590000	0.213045	0.061925	0.112967	3.71564	0.548169	0.290666	59609000	85419000	128790000	62595000	747130000	737750000	625580000	0.11433
Histone-binding protein RBBP7	RBBP7		117370000	329020000	274190000	252080000	865460000	887390000	995240000	0.380168	0.308985	0.253286	0.356726	1.21991	0.812759	149920000	415020000	205490000	209890000	876600000	1078500000	1138700000	0.473443	0.190533	0.184324	0.361236	1.03368	0.402442	22703000	194720000	220980000	247140000	234260000	547210000	689590000	0.831213	0.40383	0.358387	0.116593	1.1268	0.485832	33909000	194240000	264020000	173540000	747130000	737750000	625580000	0.259982
Ig kappa chain V-IV region Len;Ig kappa chain V-IV region;Ig kappa chain V-IV region JI;Ig kappa chain V-IV region B17	IGKV4-1		51969000	210010000	120680000	112070000	865460000	887390000	995240000	0.242657	0.135994	0.112606	0.24746	1.2077	0.560438	729410000	281070000	111340000	128340000	876600000	1078500000	1138700000	0.320637	0.103236	0.112707	2.59512	0.915964	0.321972	181970000	107420000	33070000	234940000	234260000	547210000	689590000	0.45855	0.0604338	0.340695	1.694	0.177384	0.131793	77325000	175990000	287520000	240600000	747130000	737750000	625580000	0.235555
Thyroid hormone receptor-associated protein 3	THRAP3		648530	392670000	309410000	190010000	865460000	887390000	995240000	0.453712	0.348674	0.190919	0.00165159	1.8263	0.768492	13673000	385220000	299210000	274590000	876600000	1078500000	1138700000	0.439448	0.277432	0.241143	0.035494	1.15048	0.631319	160870000	208120000	268730000	352820000	234260000	547210000	689590000	0.888415	0.491091	0.511637	0.772968	0.959842	0.552773	90968000	149620000	179650000	149370000	747130000	737750000	625580000	0.20026
ADP/ATP translocase 2;ADP/ATP translocase 2, N-terminally processed	SLC25A5		298610000	396880000	511560000	268120000	865460000	887390000	995240000	0.458577	0.576477	0.269402	0.752394	2.13984	1.2571	288650000	430700000	426660000	215000000	876600000	1078500000	1138700000	0.49133	0.395605	0.188812	0.670188	2.09523	0.805171	499860000	192490000	95623000	235220000	234260000	547210000	689590000	0.821694	0.174746	0.341101	2.59681	0.512301	0.212666	251820000	298570000	424920000	348600000	747130000	737750000	625580000	0.399623
Alpha-actinin-1	ACTN1		0	0	0	4892900	865460000	887390000	995240000	0	0	0.0049163	0	0	0	0	11091000	26465000	7215700	876600000	1078500000	1138700000	0.0126523	0.0245387	0.00633679	0	3.87242	1.93947	47505000	206970000	20905000	41620000	234260000	547210000	689590000	0.883506	0.0382029	0.0603547	0.229526	0.632973	0.0432401	7547400	0	0	814970	747130000	737750000	625580000	0
Tropomyosin alpha-1 chain	TPM1		0	0	0	0	865460000	887390000	995240000	0	0	0	0	0	0	0	0	0	0	876600000	1078500000	1138700000	0	0	0	0	0	0	0	0	43563000	59636000	234260000	547210000	689590000	0	0.0796093	0.0864804	0	0.920548	∞	20910000	1916400	3970900	2539200	747130000	737750000	625580000	0.00256502
Far upstream element-binding protein 2	KHSRP		0	0	0	0	865460000	887390000	995240000	0	0	0	0	0	0	0	0	0	0	876600000	1078500000	1138700000	0	0	0	0	0	0	0	0	0	0	234260000	547210000	689590000	0	0	0	0	0	0	2471100	0	3696400	3739800	747130000	737750000	625580000	0
SLAIN motif-containing protein 2	SLAIN2		3866400	0	0	0	865460000	887390000	995240000	0	0	0	∞	0	0	0	6855600	0	7763300	876600000	1078500000	1138700000	0.00782067	0	0.00681769	0	0	0	0	0	0	0	234260000	547210000	689590000	0	0	0	0	0	0	2512700	4548800	4644200	0	747130000	737750000	625580000	0.00608836
TAR DNA-binding protein 43	TARDBP		0	10724000	0	0	865460000	887390000	995240000	0.0123911	0	0	0	0	0	10847000	8973200	0	0	876600000	1078500000	1138700000	0.0102364	0	0	1.20882	0	0	0	0	0	0	234260000	547210000	689590000	0	0	0	0	0	0	544810	0	1165100	0	747130000	737750000	625580000	0
Polymerase I and transcript release factor	PTRF		0	0	0	0	865460000	887390000	995240000	0	0	0	0	0	0	0	0	0	0	876600000	1078500000	1138700000	0	0	0	0	0	0	0	0	0	0	234260000	547210000	689590000	0	0	0	0	0	0	2976300	3686300	3411400	4116600	747130000	737750000	625580000	0.00493395
Cullin-associated NEDD8-dissociated protein 1	CAND1		2529200	0	9461900	0	865460000	887390000	995240000	0	0.0106626	0	∞	∞	∞	9773900	11147000	16697000	0	876600000	1078500000	1138700000	0.0127162	0.0154817	0	0.876819	∞	1.21748	9940500	0	0	0	234260000	547210000	689590000	0	0	0	∞	0	0	2647500	13022000	8396800	5182600	747130000	737750000	625580000	0.0174294
Protein transport protein Sec61 subunit alpha isoform 2;Protein transport protein Sec61 subunit alpha isoform 1	SEC61A2;SEC61A1		0	0	0	0	865460000	887390000	995240000	0	0	0	0	0	0	0	0	0	0	876600000	1078500000	1138700000	0	0	0	0	0	0	0	0	0	0	234260000	547210000	689590000	0	0	0	0	0	0	0	3394600	4652400	5522600	747130000	737750000	625580000	0.00454352
Cytosolic purine 5-nucleotidase	NT5C2		0	0	0	0	865460000	887390000	995240000	0	0	0	0	0	0	0	0	0	0	876600000	1078500000	1138700000	0	0	0	0	0	0	0	0	0	0	234260000	547210000	689590000	0	0	0	0	0	0	4915600	10076000	10854000	4620100	747130000	737750000	625580000	0.0134863
Transcriptional repressor p66-beta	GATAD2B		0	0	0	0	865460000	887390000	995240000	0	0	0	0	0	0	0	15338000	0	0	876600000	1078500000	1138700000	0.0174971	0	0	0	0	0	0	0	0	0	234260000	547210000	689590000	0	0	0	0	0	0	0	4841000	5027800	449720	747130000	737750000	625580000	0.00647946
NADH-cytochrome b5 reductase 3;NADH-cytochrome b5 reductase 3 membrane-bound form;NADH-cytochrome b5 reductase 3 soluble form	CYB5R3		26428000	41733000	0	14424000	865460000	887390000	995240000	0.0482206	0	0.014493	0.633264	0	0	52282000	34639000	62887000	29388000	876600000	1078500000	1138700000	0.0395152	0.0583097	0.0258084	1.50934	2.25933	1.47563	25613000	0	17108000	0	234260000	547210000	689590000	0	0.031264	0	∞	∞	∞	18122000	14280000	12079000	10581000	747130000	737750000	625580000	0.0191131
C-Myc-binding protein	MYCBP		11162000	34302000	17787000	0	865460000	887390000	995240000	0.0396344	0.0200442	0	0.325404	∞	0.505727	0	13989000	11455000	43740000	876600000	1078500000	1138700000	0.0159582	0.0106212	0.0384122	0	0.276507	0.665564	0	0	0	21995000	234260000	547210000	689590000	0	0	0.0318958	0	0	0	4580500	10194000	4165100	15343000	747130000	737750000	625580000	0.0136442
Olfactory receptor 2B11	OR2B11		0	38475000	0	0	865460000	887390000	995240000	0.0444561	0	0	0	0	0	0	0	0	0	876600000	1078500000	1138700000	0	0	0	0	0	0	0	0	0	0	234260000	547210000	689590000	0	0	0	0	0	0	6199200	15321000	21395000	20282000	747130000	737750000	625580000	0.0205065
60S ribosomal protein L17	RPL17		15493000	12686000	17316000	0	865460000	887390000	995240000	0.0146581	0.0195134	0	1.22127	∞	1.33124	25258000	0	41987000	20656000	876600000	1078500000	1138700000	0	0.0389309	0.01814	∞	2.14614	∞	16179000	10092000	11773000	0	234260000	547210000	689590000	0.0430803	0.0215146	0	1.60315	∞	0.499406	34518000	25434000	23742000	22118000	747130000	737750000	625580000	0.0340423
60S ribosomal protein L27a	RPL27A		0	37536000	0	14383000	865460000	887390000	995240000	0.0433712	0	0.0144518	0	0	0	75937000	62258000	18312000	16814000	876600000	1078500000	1138700000	0.0710221	0.0169791	0.014766	1.21971	1.14988	0.239068	0	0	0	0	234260000	547210000	689590000	0	0	0	0	0	0	21467000	36801000	25862000	25329000	747130000	737750000	625580000	0.0492565
60S ribosomal protein L10;60S ribosomal protein L10-like	RPL10;RPL10L		10224000	0	7605600	0	865460000	887390000	995240000	0	0.00857075	0	∞	∞	∞	16047000	3170000	6516500	0	876600000	1078500000	1138700000	0.00361624	0.00604219	0	5.06215	∞	1.67085	0	0	0	0	234260000	547210000	689590000	0	0	0	0	0	0	24623000	13137000	20670000	24113000	747130000	737750000	625580000	0.0175833
Stress-70 protein, mitochondrial	HSPA9		44637000	127230000	0	45671000	865460000	887390000	995240000	0.147009	0	0.0458894	0.350837	0	0	157230000	120560000	77679000	55947000	876600000	1078500000	1138700000	0.137531	0.072025	0.0491323	1.30416	1.46594	0.523699	110510000	5648700	9458900	60267000	234260000	547210000	689590000	0.024113	0.0172857	0.0873954	19.5638	0.197787	0.716863	33739000	36146000	40854000	31140000	747130000	737750000	625580000	0.0483798
Calnexin	CANX		45789000	95383000	18103000	41340000	865460000	887390000	995240000	0.110211	0.0204003	0.0415377	0.480054	0.491127	0.185102	62144000	71511000	65537000	74585000	876600000	1078500000	1138700000	0.0815777	0.0607668	0.0655001	0.869013	0.927736	0.744895	48886000	60391000	34973000	46162000	234260000	547210000	689590000	0.257795	0.0639115	0.0669412	0.809491	0.95474	0.247916	41003000	38370000	41227000	44358000	747130000	737750000	625580000	0.0513565
26S protease regulatory subunit 6B	PSMC4		4836400	10175000	0	28514000	865460000	887390000	995240000	0.0117568	0	0.0286504	0.475322	0	0	22732000	41564000	40460000	8333600	876600000	1078500000	1138700000	0.047415	0.0375151	0.00731852	0.546916	5.12604	0.791207	0	6473400	8718200	8058600	234260000	547210000	689590000	0.0276334	0.0159321	0.0116861	0	1.36334	0.576552	46666000	28533000	36770000	25091000	747130000	737750000	625580000	0.0381901
Lysine-specific histone demethylase 1A	KDM1A		0	9180500	0	44421000	865460000	887390000	995240000	0.0106077	0	0.0446335	0	0	0	0	5910100	15910000	53563000	876600000	1078500000	1138700000	0.00674207	0.014752	0.0470387	0	0.313613	2.18805	0	0	0	0	234260000	547210000	689590000	0	0	0	0	0	0	0	37734000	24469000	26298000	747130000	737750000	625580000	0.0505053
Ig kappa chain V-I region Lay;Ig kappa chain V-III region POM;Ig kappa chain V-III region VH;Ig kappa chain V-III region CLL			8121500	76063000	60288000	25115000	865460000	887390000	995240000	0.0878874	0.0679386	0.0252351	0.106773	2.69222	0.773019	25124000	13283000	33986000	35113000	876600000	1078500000	1138700000	0.0151529	0.0315123	0.030836	1.89144	1.02193	2.07963	30564000	12079000	0	0	234260000	547210000	689590000	0.0515624	0	0	2.53034	0	0	66467000	65310000	59794000	59902000	747130000	737750000	625580000	0.0874145
Importin subunit beta-1	KPNB1		19462000	122120000	181240000	60655000	865460000	887390000	995240000	0.141104	0.204239	0.0609451	0.159368	3.3512	1.44744	73223000	171420000	90554000	66246000	876600000	1078500000	1138700000	0.195551	0.0839629	0.0581769	0.427156	1.44324	0.429366	158480000	138960000	53806000	35742000	234260000	547210000	689590000	0.593187	0.0983279	0.0518308	1.14047	1.89709	0.165762	67594000	65520000	68815000	44510000	747130000	737750000	625580000	0.0876956
60S ribosomal protein L30	RPL30		110900000	47647000	0	65792000	865460000	887390000	995240000	0.055054	0	0.0661067	2.32753	0	0	249470000	36168000	65835000	46686000	876600000	1078500000	1138700000	0.0412594	0.0610431	0.0409994	6.89753	1.48888	1.4795	0	36730000	19176000	44505000	234260000	547210000	689590000	0.156792	0.0350432	0.0645383	0	0.542983	0.223502	92525000	120390000	75185000	108200000	747130000	737750000	625580000	0.161137
Alpha-actinin-4	ACTN4		26209000	160820000	0	77123000	865460000	887390000	995240000	0.18582	0	0.0774919	0.162971	0	0	46763000	117670000	108870000	55129000	876600000	1078500000	1138700000	0.134235	0.100946	0.048414	0.397408	2.08505	0.75201	739590000	1145700000	270610000	616240000	234260000	547210000	689590000	4.89072	0.494527	0.893632	0.645535	0.553389	0.101115	69868000	49239000	65471000	39294000	747130000	737750000	625580000	0.0659042
60S ribosomal protein L15	RPL15		13848000	0	15396000	4539700	865460000	887390000	995240000	0	0.0173498	0.00456141	∞	3.80359	∞	65430000	0	8992400	5072500	876600000	1078500000	1138700000	0	0.00833788	0.00445464	∞	1.87173	∞	66716000	19722000	0	5532900	234260000	547210000	689590000	0.0841885	0	0.00802346	3.38282	0	0	90053000	92823000	67893000	72958000	747130000	737750000	625580000	0.124239
Actin-related protein 2/3 complex subunit 5	ARPC5		0	189510000	79610000	85053000	865460000	887390000	995240000	0.21897	0.0897125	0.0854598	0	1.04976	0.409702	0	0	0	72473000	876600000	1078500000	1138700000	0	0	0.0636454	0	0	0	0	0	0	43906000	234260000	547210000	689590000	0	0	0.0636697	0	0	0	169730000	71261000	79651000	124320000	747130000	737750000	625580000	0.0953797
Tyrosine-protein kinase JAK1	JAK1		29699000	56374000	47323000	62045000	865460000	887390000	995240000	0.0651376	0.0533283	0.0623417	0.526821	0.855419	0.818702	96774000	120190000	23020000	39525000	876600000	1078500000	1138700000	0.137109	0.0213445	0.0347106	0.805175	0.614926	0.155675	21655000	36037000	43462000	37564000	234260000	547210000	689590000	0.153833	0.0794247	0.0544729	0.60091	1.45806	0.516304	24099000	118360000	113360000	123320000	747130000	737750000	625580000	0.15842
60S ribosomal protein L27	RPL27		66028000	108120000	60334000	19678000	865460000	887390000	995240000	0.124928	0.0679904	0.0197721	0.610692	3.4387	0.544238	138820000	87160000	76898000	14126000	876600000	1078500000	1138700000	0.0994296	0.0713009	0.0124054	1.5927	5.74758	0.717099	61417000	14218000	0	0	234260000	547210000	689590000	0.0606932	0	0	4.31967	0	0	100460000	89021000	106570000	101220000	747130000	737750000	625580000	0.119151
26S proteasome non-ATPase regulatory subunit 4	PSMD4		77886000	233050000	89340000	190030000	865460000	887390000	995240000	0.269279	0.100677	0.190939	0.334203	0.527275	0.373877	191080000	164560000	21175000	178980000	876600000	1078500000	1138700000	0.187725	0.0196338	0.157179	1.16116	0.124913	0.104588	0	93623000	41830000	284080000	234260000	547210000	689590000	0.399654	0.0764423	0.411955	0	0.18556	0.191271	29142000	112140000	103570000	94306000	747130000	737750000	625580000	0.150094
Histone H4	HIST1H4A		11337000	316180000	145560000	98284000	865460000	887390000	995240000	0.365332	0.164032	0.0987541	0.0358562	1.66101	0.448994	18165000	164620000	230900000	203920000	876600000	1078500000	1138700000	0.187794	0.214094	0.179081	0.110345	1.19551	1.14005	66112000	139670000	27367000	61986000	234260000	547210000	689590000	0.596218	0.0500119	0.0898882	0.473344	0.556379	0.0838819	88234000	147530000	120280000	147470000	747130000	737750000	625580000	0.197462
Destrin	DSTN		231610000	166700000	54166000	67754000	865460000	887390000	995240000	0.192614	0.0610397	0.0680781	1.38938	0.896613	0.316901	391800000	192610000	48264000	88253000	876600000	1078500000	1138700000	0.219724	0.044751	0.0775033	2.03416	0.577408	0.203669	147220000	87513000	0	88915000	234260000	547210000	689590000	0.373572	0	0.128939	1.68226	0	0	1798000	243140000	148080000	122260000	747130000	737750000	625580000	0.325432
Metastasis-associated protein MTA2	MTA2		11788000	281220000	409970000	261000000	865460000	887390000	995240000	0.324937	0.461995	0.262248	0.0419174	1.76167	1.4218	58952000	494990000	475340000	280080000	876600000	1078500000	1138700000	0.56467	0.440742	0.245965	0.119097	1.79189	0.780529	25462000	61669000	98056000	164570000	234260000	547210000	689590000	0.26325	0.179193	0.238649	0.412882	0.750863	0.680693	19599000	229620000	247980000	222370000	747130000	737750000	625580000	0.307336
Triosephosphate isomerase	TPI1		256140000	629740000	108760000	426940000	865460000	887390000	995240000	0.727636	0.122562	0.428982	0.406739	0.285704	0.168438	1056600000	577590000	552000000	401250000	876600000	1078500000	1138700000	0.658898	0.511822	0.352376	1.82933	1.45249	0.776785	551120000	682930000	252010000	355580000	234260000	547210000	689590000	2.91527	0.460536	0.51564	0.806993	0.893136	0.157974	211570000	250100000	287370000	253850000	747130000	737750000	625580000	0.334748
Enhancer of rudimentary homolog	ERH		96646000	720830000	564240000	420920000	865460000	887390000	995240000	0.832887	0.635842	0.422933	0.134076	1.50341	0.76342	169700000	977420000	438380000	284090000	876600000	1078500000	1138700000	1.11501	0.406472	0.249486	0.17362	1.62924	0.364545	275540000	372840000	727830000	390220000	234260000	547210000	689590000	1.59156	1.33007	0.565872	0.73903	2.35048	0.835702	205370000	291170000	278320000	351690000	747130000	737750000	625580000	0.389718
Tubulin beta chain	TUBB		366940000	404850000	110820000	264420000	865460000	887390000	995240000	0.467786	0.124883	0.265685	0.90636	0.470043	0.266966	546160000	483210000	265640000	262490000	876600000	1078500000	1138700000	0.551232	0.246305	0.230517	1.13027	1.06849	0.446826	305890000	270700000	87059000	187490000	234260000	547210000	689590000	1.15555	0.159096	0.271886	1.13	0.585157	0.13768	421060000	308480000	534940000	483150000	747130000	737750000	625580000	0.412887
Actin-related protein 2/3 complex subunit 4	ARPC4		164240000	1650200000	385750000	608850000	865460000	887390000	995240000	1.90673	0.434702	0.611762	0.0995273	0.710573	0.227983	446570000	1195400000	749390000	765860000	876600000	1078500000	1138700000	1.36368	0.694845	0.672574	0.373574	1.03311	0.509537	1311300000	781420000	240220000	872460000	234260000	547210000	689590000	3.3357	0.438991	1.26519	1.6781	0.346977	0.131604	525820000	574750000	739050000	950780000	747130000	737750000	625580000	0.769277
Unconventional myosin-VI	MYO6		87495000	1995100000	543420000	940100000	865460000	887390000	995240000	2.30525	0.61238	0.944596	0.0438549	0.648298	0.265646	314220000	741990000	808790000	754320000	876600000	1078500000	1138700000	0.846441	0.749921	0.66244	0.423483	1.13206	0.88597	354890000	1589700000	381020000	660420000	234260000	547210000	689590000	6.78605	0.696296	0.9577	0.223243	0.72705	0.102607	594100000	999490000	931580000	1049200000	747130000	737750000	625580000	1.33777
Tropomodulin-3	TMOD3		4964400000	12974000000	4755800000	5831800000	865460000	887390000	995240000	14.9909	5.35931	5.85969	0.382642	0.914606	0.357505	11872000000	8815600000	6135400000	6803400000	876600000	1078500000	1138700000	10.0566	5.68883	5.97471	1.3467	0.952151	0.565682	8897200000	5565600000	3246400000	5125300000	234260000	547210000	689590000	23.7582	5.93264	7.43239	1.59861	0.798215	0.249709	3553600000	6308500000	4352300000	5453400000	747130000	737750000	625580000	8.44364
26S protease regulatory subunit 8	PSMC5		11100000	0	11912000	9999300	865460000	887390000	995240000	0	0.0134236	0.0100471	∞	1.33607	∞	20421000	0	5324300	4945600	876600000	1078500000	1138700000	0	0.00493676	0.0043432	∞	1.13667	∞	0	0	0	0	234260000	547210000	689590000	0	0	0	0	0	0	413170	6855400	8842000	6880400	747130000	737750000	625580000	0.00917565
Dedicator of cytokinesis protein 8	DOCK8		0	0	0	0	865460000	887390000	995240000	0	0	0	0	0	0	0	0	0	0	876600000	1078500000	1138700000	0	0	0	0	0	0	0	0	0	0	234260000	547210000	689590000	0	0	0	0	0	0	0	4571000	5655800	4755200	747130000	737750000	625580000	0.00611808
Monofunctional C1-tetrahydrofolate synthase, mitochondrial	MTHFD1L		9602500	24579000	8082400	14380000	865460000	887390000	995240000	0.0283999	0.00910806	0.0144488	0.390679	0.630369	0.320707	37526000	19635000	13255000	9570800	876600000	1078500000	1138700000	0.022399	0.0122902	0.00840502	1.91118	1.46225	0.548694	20655000	4936800	0	0	234260000	547210000	689590000	0.021074	0	0	4.18388	0	0	0	6473200	8871000	1385200	747130000	737750000	625580000	0.00866409
Dolichol-phosphate mannosyltransferase subunit 1	DPM1		155750000	122060000	0	0	865460000	887390000	995240000	0.141035	0	0	1.27601	0	0	228350000	116120000	60565000	0	876600000	1078500000	1138700000	0.132466	0.0561567	0	1.9665	∞	0.423932	352780000	0	30731000	0	234260000	547210000	689590000	0	0.0561594	0	∞	∞	∞	15012000	36198000	65401000	35481000	747130000	737750000	625580000	0.0484494
60S ribosomal protein L11	RPL11		20724000	31164000	0	22769000	865460000	887390000	995240000	0.0360086	0	0.0228779	0.664998	0	0	70957000	28340000	0	0	876600000	1078500000	1138700000	0.0323295	0	0	2.50378	0	0	44960000	0	0	0	234260000	547210000	689590000	0	0	0	∞	0	0	13079000	16295000	24595000	17378000	747130000	737750000	625580000	0.0218101
Fibrinogen gamma chain	FGG		0	128600000	12574000	15007000	865460000	887390000	995240000	0.148592	0.0141696	0.0150788	0	0.939708	0.0953597	60211000	146030000	21848000	9351500	876600000	1078500000	1138700000	0.166587	0.0202578	0.00821244	0.412319	2.46672	0.121605	32737000	24156000	66388000	19381000	234260000	547210000	689590000	0.103116	0.121321	0.0281051	1.35523	4.31668	1.17655	7828000	21496000	28723000	24122000	747130000	737750000	625580000	0.0287714
60S ribosomal protein L8	RPL8		91794000	54439000	64534000	0	865460000	887390000	995240000	0.0629018	0.0727234	0	1.68618	∞	1.15614	131170000	55985000	63847000	0	876600000	1078500000	1138700000	0.0638661	0.0591998	0	2.34295	∞	0.926937	54145000	43914000	41664000	15502000	234260000	547210000	689590000	0.187458	0.076139	0.02248	1.23298	3.38696	0.406165	62874000	69462000	112750000	62703000	747130000	737750000	625580000	0.0929718
Protein phosphatase 1B	PPM1B		0	7355200	6212000	23873000	865460000	887390000	995240000	0.0084986	0.0070003	0.0239872	0	0.291835	0.823701	10524000	22368000	0	22669000	876600000	1078500000	1138700000	0.0255168	0	0.0199078	0.470494	0	0	24925000	11345000	0	27977000	234260000	547210000	689590000	0.0484291	0	0.0405705	2.197	0	0	42718000	117500000	139670000	91616000	747130000	737750000	625580000	0.157268
Methylosome protein 50	WDR77		2008900000	2067300000	1251800000	1682300000	865460000	887390000	995240000	2.38867	1.41065	1.69035	0.971751	0.834535	0.59056	2670300000	3083900000	1839000000	1764300000	876600000	1078500000	1138700000	3.51802	1.70515	1.5494	0.865884	1.10052	0.484689	3317700000	2094800000	1239400000	1914100000	234260000	547210000	689590000	8.9422	2.26494	2.77571	1.58378	0.815988	0.253287	759200000	849350000	1330700000	475550000	747130000	737750000	625580000	1.13682
26S proteasome non-ATPase regulatory subunit 11	PSMD11		0	0	0	0	865460000	887390000	995240000	0	0	0	0	0	0	0	0	0	0	876600000	1078500000	1138700000	0	0	0	0	0	0	0	0	0	0	234260000	547210000	689590000	0	0	0	0	0	0	0	0	0	0	747130000	737750000	625580000	0
Histone H2A type 1-J;Histone H2A type 1-H;Histone H2A.J;Histone H2A type 1-C;Histone H2A type 3;Histone H2A type 1-D;Histone H2A type 1;Histone H2A type 1-B/E;Histone H2A type 2-B;Histone H2AX	HIST1H2AJ;HIST1H2AH;H2AFJ;HIST1H2AC;HIST3H2A;HIST1H2AD;HIST1H2AG;HIST1H2AB;HIST2H2AB;H2AFX		0	0	0	0	865460000	887390000	995240000	0	0	0	0	0	0	0	0	0	0	876600000	1078500000	1138700000	0	0	0	0	0	0	0	0	0	0	234260000	547210000	689590000	0	0	0	0	0	0	0	0	0	0	747130000	737750000	625580000	0
Electron transfer flavoprotein subunit alpha, mitochondrial	ETFA		0	0	0	0	865460000	887390000	995240000	0	0	0	0	0	0	0	0	0	0	876600000	1078500000	1138700000	0	0	0	0	0	0	0	0	0	0	234260000	547210000	689590000	0	0	0	0	0	0	0	0	0	0	747130000	737750000	625580000	0
Ras-related protein Rab-7a	RAB7A		0	0	0	0	865460000	887390000	995240000	0	0	0	0	0	0	0	0	0	0	876600000	1078500000	1138700000	0	0	0	0	0	0	0	0	0	0	234260000	547210000	689590000	0	0	0	0	0	0	0	0	0	0	747130000	737750000	625580000	0
Spectrin beta chain, non-erythrocytic 1	SPTBN1		0	0	0	0	865460000	887390000	995240000	0	0	0	0	0	0	0	0	0	0	876600000	1078500000	1138700000	0	0	0	0	0	0	0	0	0	0	234260000	547210000	689590000	0	0	0	0	0	0	0	0	0	0	747130000	737750000	625580000	0
Plectin	PLEC		0	0	0	0	865460000	887390000	995240000	0	0	0	0	0	0	0	0	0	0	876600000	1078500000	1138700000	0	0	0	0	0	0	0	0	0	0	234260000	547210000	689590000	0	0	0	0	0	0	0	0	0	0	747130000	737750000	625580000	0
MOB kinase activator 1A;MOB kinase activator 1B	MOB1A;MOB1B		0	0	0	0	865460000	887390000	995240000	0	0	0	0	0	0	0	0	0	0	876600000	1078500000	1138700000	0	0	0	0	0	0	0	0	0	0	234260000	547210000	689590000	0	0	0	0	0	0	0	0	0	0	747130000	737750000	625580000	0
E3 ubiquitin-protein ligase RNF5	RNF5		0	0	0	0	865460000	887390000	995240000	0	0	0	0	0	0	0	0	0	0	876600000	1078500000	1138700000	0	0	0	0	0	0	0	0	0	0	234260000	547210000	689590000	0	0	0	0	0	0	0	0	0	0	747130000	737750000	625580000	0
Histone deacetylase complex subunit SAP130	SAP130		0	0	0	0	865460000	887390000	995240000	0	0	0	0	0	0	0	0	0	0	876600000	1078500000	1138700000	0	0	0	0	0	0	0	0	0	0	234260000	547210000	689590000	0	0	0	0	0	0	0	0	0	0	747130000	737750000	625580000	0
26S proteasome non-ATPase regulatory subunit 13	PSMD13		0	0	0	0	865460000	887390000	995240000	0	0	0	0	0	0	0	0	0	0	876600000	1078500000	1138700000	0	0	0	0	0	0	0	0	0	0	234260000	547210000	689590000	0	0	0	0	0	0	0	0	0	0	747130000	737750000	625580000	0
Phospholipase A-2-activating protein	PLAA		0	0	0	0	865460000	887390000	995240000	0	0	0	0	0	0	0	0	0	0	876600000	1078500000	1138700000	0	0	0	0	0	0	0	0	0	0	234260000	547210000	689590000	0	0	0	0	0	0	0	0	0	0	747130000	737750000	625580000	0
FERM, RhoGEF and pleckstrin domain-containing protein 1	FARP1		0	0	0	0	865460000	887390000	995240000	0	0	0	0	0	0	20310000	0	0	0	876600000	1078500000	1138700000	0	0	0	∞	0	0	0	0	0	0	234260000	547210000	689590000	0	0	0	0	0	0	0	0	0	0	747130000	737750000	625580000	0
Caveolin-1	CAV1		14274000	0	0	0	865460000	887390000	995240000	0	0	0	∞	0	0	0	0	0	0	876600000	1078500000	1138700000	0	0	0	0	0	0	0	0	0	0	234260000	547210000	689590000	0	0	0	0	0	0	8317400	0	0	0	747130000	737750000	625580000	0
Gem-associated protein 2	GEMIN2		18813000	0	9359500	4563300	865460000	887390000	995240000	0	0.0105472	0.00458513	∞	2.30031	∞	23933000	0	17447000	0	876600000	1078500000	1138700000	0	0.0161771	0	∞	∞	∞	0	0	0	0	234260000	547210000	689590000	0	0	0	0	0	0	0	0	0	0	747130000	737750000	625580000	0
14-3-3 protein beta/alpha;14-3-3 protein beta/alpha, N-terminally processed	YWHAB		1790700	0	0	0	865460000	887390000	995240000	0	0	0	∞	0	0	8131700	2556500	5930400	0	876600000	1078500000	1138700000	0.00291638	0.00549875	0	3.18079	∞	1.88547	0	0	0	0	234260000	547210000	689590000	0	0	0	0	0	0	824640	0	0	0	747130000	737750000	625580000	0
Chloride intracellular channel protein 1	CLIC1		0	0	0	0	865460000	887390000	995240000	0	0	0	0	0	0	17284000	4830000	8662200	0	876600000	1078500000	1138700000	0.00550992	0.00803171	0	3.57847	∞	1.45768	20699000	0	0	0	234260000	547210000	689590000	0	0	0	∞	0	0	0	0	0	0	747130000	737750000	625580000	0
WD repeat-containing protein 61;WD repeat-containing protein 61, N-terminally processed	WDR61		0	0	0	0	865460000	887390000	995240000	0	0	0	0	0	0	0	0	0	0	876600000	1078500000	1138700000	0	0	0	0	0	0	0	0	0	0	234260000	547210000	689590000	0	0	0	0	0	0	0	0	0	0	747130000	737750000	625580000	0
Cullin-1	CUL1		0	4376700	0	0	865460000	887390000	995240000	0.00505708	0	0	0	0	0	0	0	0	6278300	876600000	1078500000	1138700000	0	0	0.00551357	0	0	0	0	0	0	0	234260000	547210000	689590000	0	0	0	0	0	0	0	0	0	0	747130000	737750000	625580000	0
Complement C4-B;Complement C4 beta chain;Complement C4-B alpha chain;C4a anaphylatoxin;C4b-B;C4d-B;Complement C4 gamma chain;Complement C4-A;Complement C4 beta chain;Complement C4-A alpha chain;C4a anaphylatoxin;C4b-A;C4d-A;Complement C4 gamma chain	C4B;C4A		0	0	0	0	865460000	887390000	995240000	0	0	0	0	0	0	0	0	0	0	876600000	1078500000	1138700000	0	0	0	0	0	0	11197000	0	96596000	0	234260000	547210000	689590000	0	0.176525	0	∞	∞	∞	0	0	0	0	747130000	737750000	625580000	0
Ig kappa chain C region	IGKC		4720800	10586000	0	0	865460000	887390000	995240000	0.0122316	0	0	0.445947	0	0	0	0	0	0	876600000	1078500000	1138700000	0	0	0	0	0	0	0	12269000	17544000	0	234260000	547210000	689590000	0.0523734	0.0320608	0	0	∞	0.612158	0	0	0	0	747130000	737750000	625580000	0
Calcium-regulated heat stable protein 1	CARHSP1		0	25500000	0	7671000	865460000	887390000	995240000	0.0294641	0	0.00770769	0	0	0	31272000	20336000	17595000	12269000	876600000	1078500000	1138700000	0.0231987	0.0163143	0.0107746	1.53777	1.51415	0.703242	0	15223000	0	10840000	234260000	547210000	689590000	0.0649834	0	0.0157195	0	0	0	0	0	0	0	747130000	737750000	625580000	0
Synaptotagmin-9	SYT9		11005000	24123000	0	16202000	865460000	887390000	995240000	0.027873	0	0.0162795	0.456204	0	0	15708000	34201000	19436000	20867000	876600000	1078500000	1138700000	0.0390155	0.0180213	0.0183253	0.459285	0.983413	0.461902	31047000	36741000	34888000	31807000	234260000	547210000	689590000	0.156839	0.0637561	0.0461245	0.845023	1.38226	0.406508	0	0	0	0	747130000	737750000	625580000	0
Ankyrin repeat and FYVE domain-containing protein 1	ANKFY1		0	0	0	0	865460000	887390000	995240000	0	0	0	0	0	0	0	11840000	0	0	876600000	1078500000	1138700000	0.0135067	0	0	0	0	0	0	41997000	0	0	234260000	547210000	689590000	0.179275	0	0	0	0	0	0	0	0	0	747130000	737750000	625580000	0
Beta-actin-like protein 2	ACTBL2		0	0	0	0	865460000	887390000	995240000	0	0	0	0	0	0	0	257110000	0	0	876600000	1078500000	1138700000	0.293304	0	0	0	0	0	0	50177000	0	65300000	234260000	547210000	689590000	0.214194	0	0.0946939	0	0	0	0	0	0	0	747130000	737750000	625580000	0
Glycogen [starch] synthase, muscle	GYS1		30890000	6239300	0	0	865460000	887390000	995240000	0.00720923	0	0	4.95088	0	0	158730000	9019000	0	0	876600000	1078500000	1138700000	0.0102886	0	0	17.5995	0	0	15584000	0	0	0	234260000	547210000	689590000	0	0	0	∞	0	0	19268000	0	0	26121000	747130000	737750000	625580000	0
60S ribosomal protein L37a	RPL37A		0	0	0	0	865460000	887390000	995240000	0	0	0	0	0	0	0	0	0	0	876600000	1078500000	1138700000	0	0	0	0	0	0	0	0	0	0	234260000	547210000	689590000	0	0	0	0	0	0	0	1824700	0	0	747130000	737750000	625580000	0.00244228
Serine/arginine-rich splicing factor 1	SRSF1		10299000	0	0	10496000	865460000	887390000	995240000	0	0	0.0105462	∞	0	0	15353000	0	17659000	19580000	876600000	1078500000	1138700000	0	0.0163737	0.017195	∞	0.952232	∞	26494000	0	0	4618500	234260000	547210000	689590000	0	0	0.00669746	∞	0	0	3349600	3431600	0	3512800	747130000	737750000	625580000	0.00459304
Transcription initiation factor TFIID subunit 12	TAF12		5579200	1395400	0	0	865460000	887390000	995240000	0.00161232	0	0	3.99828	0	0	16561000	6389900	0	0	876600000	1078500000	1138700000	0.00728941	0	0	2.59175	0	0	17231000	0	0	11848000	234260000	547210000	689590000	0	0	0.0171812	∞	0	0	0	0	0	0	747130000	737750000	625580000	0
Brefeldin A-inhibited guanine nucleotide-exchange protein 2	ARFGEF2		0	0	0	0	865460000	887390000	995240000	0	0	0	0	0	0	0	0	0	0	876600000	1078500000	1138700000	0	0	0	0	0	0	0	0	0	0	234260000	547210000	689590000	0	0	0	0	0	0	0	0	0	0	747130000	737750000	625580000	0
Secretogranin-3	SCG3		0	0	0	0	865460000	887390000	995240000	0	0	0	0	0	0	0	0	0	0	876600000	1078500000	1138700000	0	0	0	0	0	0	0	0	0	0	234260000	547210000	689590000	0	0	0	0	0	0	0	0	0	0	747130000	737750000	625580000	0
Putative keratin-87 protein	KRT87P		0	0	0	0	865460000	887390000	995240000	0	0	0	0	0	0	0	0	0	0	876600000	1078500000	1138700000	0	0	0	0	0	0	0	0	0	0	234260000	547210000	689590000	0	0	0	0	0	0	0	0	0	0	747130000	737750000	625580000	0
Ig gamma-2 chain C region	IGHG2		77493000	712690000	119180000	228900000	865460000	887390000	995240000	0.823481	0.134304	0.229995	0.108733	0.583944	0.163093	102250000	689550000	93133000	190180000	876600000	1078500000	1138700000	0.786619	0.0863542	0.167015	0.148285	0.517044	0.109779	0	61468000	150730000	301220000	234260000	547210000	689590000	0.262392	0.275452	0.43681	0	0.630598	1.04977	108450000	0	196720000	0	747130000	737750000	625580000	0
Lamina-associated polypeptide 2, isoforms beta/gamma;Thymopoietin;Thymopentin;Lamina-associated polypeptide 2, isoform alpha;Thymopoietin;Thymopentin	TMPO		21792000	7676600	0	0	865460000	887390000	995240000	0.00886997	0	0	2.83876	0	0	47493000	0	0	0	876600000	1078500000	1138700000	0	0	0	∞	0	0	0	0	0	0	234260000	547210000	689590000	0	0	0	0	0	0	7369900	2184000	0	0	747130000	737750000	625580000	0.00292319
THO complex subunit 4	ALYREF		0	0	0	0	865460000	887390000	995240000	0	0	0	0	0	0	0	0	0	0	876600000	1078500000	1138700000	0	0	0	0	0	0	0	0	0	0	234260000	547210000	689590000	0	0	0	0	0	0	0	2228800	0	0	747130000	737750000	625580000	0.00298315
Cyclin-dependent-like kinase 5;Cyclin-dependent kinase 1;Cyclin-dependent kinase 2;Cyclin-dependent kinase 4;Cyclin-dependent kinase 3;Cyclin-dependent kinase 6;Cyclin-dependent kinase 9;Cyclin-dependent kinase 15;Cyclin-dependent kinase 14;Cyclin-dependent kinase 18;Cyclin-dependent kinase 16;Cyclin-dependent kinase 17;Cyclin-dependent kinase 12;Cyclin-dependent kinase 13	CDK5;CDK1;CDK2;CDK4;CDK3;CDK6;CDK9;CDK15;CDK14;CDK18;CDK16;CDK17;CDK12;CDK13		8160700	15920000	0	0	865460000	887390000	995240000	0.0183948	0	0	0.512607	0	0	27026000	0	0	5457100	876600000	1078500000	1138700000	0	0	0.00479239	∞	0	0	0	0	0	9417700	234260000	547210000	689590000	0	0	0.013657	0	0	0	2972800	0	0	1632700	747130000	737750000	625580000	0
Ras GTPase-activating protein-binding protein 1	G3BP1		0	0	0	0	865460000	887390000	995240000	0	0	0	0	0	0	0	0	0	0	876600000	1078500000	1138700000	0	0	0	0	0	0	0	0	0	0	234260000	547210000	689590000	0	0	0	0	0	0	2987700	2108700	0	1300900	747130000	737750000	625580000	0.0028224
Exportin-2	CSE1L		0	0	0	0	865460000	887390000	995240000	0	0	0	0	0	0	0	0	0	0	876600000	1078500000	1138700000	0	0	0	0	0	0	0	0	0	0	234260000	547210000	689590000	0	0	0	0	0	0	3662200	0	2768600	0	747130000	737750000	625580000	0
Barrier-to-autointegration factor;Barrier-to-autointegration factor, N-terminally processed	BANF1		0	0	0	0	865460000	887390000	995240000	0	0	0	0	0	0	0	0	0	0	876600000	1078500000	1138700000	0	0	0	0	0	0	0	0	0	0	234260000	547210000	689590000	0	0	0	0	0	0	30623000	0	0	0	747130000	737750000	625580000	0
40S ribosomal protein S7	RPS7		0	0	0	0	865460000	887390000	995240000	0	0	0	0	0	0	6773500	0	0	0	876600000	1078500000	1138700000	0	0	0	∞	0	0	0	0	0	0	234260000	547210000	689590000	0	0	0	0	0	0	11571000	1606200	3122100	0	747130000	737750000	625580000	0.00214983
ADP-ribosylation factor 5;ADP-ribosylation factor 1;ADP-ribosylation factor 3	ARF5;ARF1;ARF3		0	0	0	0	865460000	887390000	995240000	0	0	0	0	0	0	0	0	0	0	876600000	1078500000	1138700000	0	0	0	0	0	0	0	0	0	0	234260000	547210000	689590000	0	0	0	0	0	0	4626800	0	3508600	0	747130000	737750000	625580000	0
Putative heat shock protein HSP 90-beta 2	HSP90AB2P		0	0	0	0	865460000	887390000	995240000	0	0	0	0	0	0	0	0	0	0	876600000	1078500000	1138700000	0	0	0	0	0	0	0	0	0	0	234260000	547210000	689590000	0	0	0	0	0	0	0	0	0	3569300	747130000	737750000	625580000	0
Tubulin alpha-1C chain	TUBA1C		0	0	0	0	865460000	887390000	995240000	0	0	0	0	0	0	0	0	0	0	876600000	1078500000	1138700000	0	0	0	0	0	0	0	0	0	0	234260000	547210000	689590000	0	0	0	0	0	0	12182000	12275000	0	7815800	747130000	737750000	625580000	0.0164295
40S ribosomal protein S10	RPS10		0	0	0	0	865460000	887390000	995240000	0	0	0	0	0	0	6591200	0	5887700	0	876600000	1078500000	1138700000	0	0.00545916	0	∞	∞	∞	0	11758000	3706600	0	234260000	547210000	689590000	0.0501921	0.00677363	0	0	∞	0.134954	0	4584000	2259000	0	747130000	737750000	625580000	0.00613548
40S ribosomal protein S12	RPS12		0	0	0	0	865460000	887390000	995240000	0	0	0	0	0	0	0	0	0	0	876600000	1078500000	1138700000	0	0	0	0	0	0	0	0	0	0	234260000	547210000	689590000	0	0	0	0	0	0	8034400	2506600	0	0	747130000	737750000	625580000	0.00335497
Fascin	FSCN1		0	11786000	0	0	865460000	887390000	995240000	0.0136182	0	0	0	0	0	18754000	25398000	0	0	876600000	1078500000	1138700000	0.0289733	0	0	0.738405	0	0	0	0	0	0	234260000	547210000	689590000	0	0	0	0	0	0	0	2344200	6755200	5911900	747130000	737750000	625580000	0.00313761
Nascent polypeptide-associated complex subunit alpha;Nascent polypeptide-associated complex subunit alpha, muscle-specific form	NACA		0	11450000	0	0	865460000	887390000	995240000	0.01323	0	0	0	0	0	0	0	0	0	876600000	1078500000	1138700000	0	0	0	0	0	0	0	0	0	0	234260000	547210000	689590000	0	0	0	0	0	0	8731400	1754900	4669800	4405900	747130000	737750000	625580000	0.00234885
Obg-like ATPase 1	OLA1		0	0	0	0	865460000	887390000	995240000	0	0	0	0	0	0	0	0	0	0	876600000	1078500000	1138700000	0	0	0	0	0	0	0	0	0	0	234260000	547210000	689590000	0	0	0	0	0	0	3573800	0	0	0	747130000	737750000	625580000	0
40S ribosomal protein S25	RPS25		8048800	15851000	0	0	865460000	887390000	995240000	0.0183151	0	0	0.507779	0	0	34642000	11859000	2179800	2822400	876600000	1078500000	1138700000	0.0135284	0.00202114	0.00247862	2.92116	0.815431	0.1494	173460000	7379500	5993400	0	234260000	547210000	689590000	0.0315013	0.0109527	0	23.5057	∞	0.347689	9126800	0	6644500	5164500	747130000	737750000	625580000	0
Fructose-bisphosphate aldolase C	ALDOC		0	0	0	0	865460000	887390000	995240000	0	0	0	0	0	0	25172000	0	0	0	876600000	1078500000	1138700000	0	0	0	∞	0	0	0	0	0	0	234260000	547210000	689590000	0	0	0	0	0	0	11478000	5940000	9533600	7405800	747130000	737750000	625580000	0.00795042
Annexin A5	ANXA5		0	0	0	0	865460000	887390000	995240000	0	0	0	0	0	0	26889000	0	23625000	0	876600000	1078500000	1138700000	0	0.0219054	0	∞	∞	∞	0	0	0	0	234260000	547210000	689590000	0	0	0	0	0	0	6127200	1250400	4580900	2295900	747130000	737750000	625580000	0.0016736
Plastin-3	PLS3		4583200	0	0	4609700	865460000	887390000	995240000	0	0	0.00463175	∞	0	0	20318000	8389600	15433000	0	876600000	1078500000	1138700000	0.00957061	0.0143097	0	2.42181	∞	1.49517	36314000	0	0	4527800	234260000	547210000	689590000	0	0	0.00656593	∞	0	0	8047000	4666200	9658500	7169000	747130000	737750000	625580000	0.0062455
Prelamin-A/C;Lamin-A/C	LMNA		19617000	0	0	0	865460000	887390000	995240000	0	0	0	∞	0	0	0	0	0	0	876600000	1078500000	1138700000	0	0	0	0	0	0	0	0	0	0	234260000	547210000	689590000	0	0	0	0	0	0	17004000	0	3839500	0	747130000	737750000	625580000	0
Rho GDP-dissociation inhibitor 1	ARHGDIA		0	0	0	0	865460000	887390000	995240000	0	0	0	0	0	0	12137000	0	0	0	876600000	1078500000	1138700000	0	0	0	∞	0	0	0	0	0	0	234260000	547210000	689590000	0	0	0	0	0	0	18794000	0	13018000	8626600	747130000	737750000	625580000	0
Serine/threonine-protein phosphatase PP1-gamma catalytic subunit;Serine/threonine-protein phosphatase PP1-beta catalytic subunit;Serine/threonine-protein phosphatase PP1-alpha catalytic subunit	PPP1CC;PPP1CB;PPP1CA		0	0	0	0	865460000	887390000	995240000	0	0	0	0	0	0	0	0	0	0	876600000	1078500000	1138700000	0	0	0	0	0	0	0	0	0	0	234260000	547210000	689590000	0	0	0	0	0	0	7291800	6786800	8841900	3672700	747130000	737750000	625580000	0.00908383
Eukaryotic translation initiation factor 5A-1;Eukaryotic translation initiation factor 5A-2;Eukaryotic translation initiation factor 5A-1-like	EIF5A;EIF5A2;EIF5AL1		0	0	0	0	865460000	887390000	995240000	0	0	0	0	0	0	52095000	0	0	0	876600000	1078500000	1138700000	0	0	0	∞	0	0	25513000	13895000	0	8966400	234260000	547210000	689590000	0.0593144	0	0.0130025	1.83613	0	0	8070900	2991500	11464000	4161100	747130000	737750000	625580000	0.00400399
Protein SET;Protein SETSIP	SET;SETSIP		2365300	0	0	0	865460000	887390000	995240000	0	0	0	∞	0	0	7860400	0	7003400	0	876600000	1078500000	1138700000	0	0.00649365	0	∞	∞	∞	0	0	0	0	234260000	547210000	689590000	0	0	0	0	0	0	12533000	1872600	10358000	5293000	747130000	737750000	625580000	0.00250639
Nucleosome assembly protein 1-like 1	NAP1L1		14170000	0	0	0	865460000	887390000	995240000	0	0	0	∞	0	0	9239500	0	0	0	876600000	1078500000	1138700000	0	0	0	∞	0	0	0	0	0	0	234260000	547210000	689590000	0	0	0	0	0	0	25113000	8198100	20217000	10629000	747130000	737750000	625580000	0.0109728
Protein disulfide-isomerase	P4HB		0	0	0	0	865460000	887390000	995240000	0	0	0	0	0	0	6854300	0	7978600	5293000	876600000	1078500000	1138700000	0	0.00739787	0.00464828	∞	1.59153	∞	0	0	0	0	234260000	547210000	689590000	0	0	0	0	0	0	17233000	5439900	11512000	6621800	747130000	737750000	625580000	0.00728106
Gamma-enolase	ENO2		4641500	5994100	0	0	865460000	887390000	995240000	0.00692591	0	0	0.774345	0	0	25151000	0	23247000	15902000	876600000	1078500000	1138700000	0	0.0215549	0.013965	∞	1.54349	∞	21506000	0	0	0	234260000	547210000	689590000	0	0	0	∞	0	0	41979000	10193000	27891000	0	747130000	737750000	625580000	0.0136429
Ankyrin repeat domain-containing protein 26	ANKRD26		250670000	0	14193000	0	865460000	887390000	995240000	0	0.0159941	0	∞	∞	∞	33756000	62260000	0	22526000	876600000	1078500000	1138700000	0.0710244	0	0.0197822	0.542178	0	0	0	0	0	0	234260000	547210000	689590000	0	0	0	0	0	0	38804000	75065000	79789000	69240000	747130000	737750000	625580000	0.100471
Toll-interacting protein	TOLLIP		0	69750000	2736100	26752000	865460000	887390000	995240000	0.080593	0.00308331	0.0268799	0	0.114707	0.0382578	0	0	0	25276000	876600000	1078500000	1138700000	0	0	0.0221972	0	0	0	0	76640000	19213000	0	234260000	547210000	689590000	0.327158	0.0351108	0	0	∞	0.107321	8563700	61437000	3938000	1157700	747130000	737750000	625580000	0.0822307
Mitogen-activated protein kinase 6;Mitogen-activated protein kinase 1;Mitogen-activated protein kinase 3;Mitogen-activated protein kinase 4	MAPK6;MAPK1;MAPK3;MAPK4		0	10082000	0	3258900	865460000	887390000	995240000	0.0116493	0	0.00327449	0	0	0	1816500	0	0	3169200	876600000	1078500000	1138700000	0	0	0.00278317	∞	0	0	0	0	0	5087600	234260000	547210000	689590000	0	0	0.00737772	0	0	0	0	0	0	257960	747130000	737750000	625580000	0
Eukaryotic initiation factor 4A-I;Eukaryotic initiation factor 4A-II	EIF4A1;EIF4A2		0	0	0	0	865460000	887390000	995240000	0	0	0	0	0	0	0	17463000	0	0	876600000	1078500000	1138700000	0.0199213	0	0	0	0	0	0	0	0	0	234260000	547210000	689590000	0	0	0	0	0	0	12191000	0	2741200	3109000	747130000	737750000	625580000	0
F-actin-capping protein subunit beta	CAPZB		0	0	0	0	865460000	887390000	995240000	0	0	0	0	0	0	17034000	0	0	0	876600000	1078500000	1138700000	0	0	0	∞	0	0	0	0	0	0	234260000	547210000	689590000	0	0	0	0	0	0	16043000	6648400	1997100	0	747130000	737750000	625580000	0.00889859
Beta-enolase	ENO3		0	0	0	0	865460000	887390000	995240000	0	0	0	0	0	0	0	0	0	0	876600000	1078500000	1138700000	0	0	0	0	0	0	0	0	0	0	234260000	547210000	689590000	0	0	0	0	0	0	14566000	2425000	8370700	4029000	747130000	737750000	625580000	0.00324575
BAG family molecular chaperone regulator 2	BAG2		0	0	0	0	865460000	887390000	995240000	0	0	0	0	0	0	0	0	0	0	876600000	1078500000	1138700000	0	0	0	0	0	0	0	0	0	0	234260000	547210000	689590000	0	0	0	0	0	0	4060400	3088400	2528100	2251700	747130000	737750000	625580000	0.00413368
Heterogeneous nuclear ribonucleoprotein A3	HNRNPA3		0	0	0	0	865460000	887390000	995240000	0	0	0	0	0	0	0	0	0	0	876600000	1078500000	1138700000	0	0	0	0	0	0	8680500	0	0	0	234260000	547210000	689590000	0	0	0	∞	0	0	6842200	3701900	6946500	5650200	747130000	737750000	625580000	0.00495483
Splicing factor, proline- and glutamine-rich	SFPQ		0	13729000	0	0	865460000	887390000	995240000	0.0158632	0	0	0	0	0	6207200	0	0	0	876600000	1078500000	1138700000	0	0	0	∞	0	0	0	0	0	0	234260000	547210000	689590000	0	0	0	0	0	0	6221500	7884100	5735900	5384300	747130000	737750000	625580000	0.0105525
Protein S100-A4	S100A4		986940	4086500	0	7220700	865460000	887390000	995240000	0.00472177	0	0.00725523	0.241512	0	0	2961500	3558100	7570700	8082000	876600000	1078500000	1138700000	0.00405898	0.00701966	0.00709757	0.832326	0.989023	1.72941	0	3992400	0	5788800	234260000	547210000	689590000	0.0170426	0	0.00839455	0	0	0	31723000	1707100	826670	1535900	747130000	737750000	625580000	0.00228488
Serine-threonine kinase receptor-associated protein	STRAP		18113000	0	14891000	0	865460000	887390000	995240000	0	0.0167807	0	∞	∞	∞	24573000	14103000	13518000	0	876600000	1078500000	1138700000	0.0160883	0.0125341	0	1.7424	∞	0.77908	34914000	0	10867000	0	234260000	547210000	689590000	0	0.0198589	0	∞	∞	∞	2025500	0	0	0	747130000	737750000	625580000	0
26S protease regulatory subunit 6A	PSMC3		0	0	0	0	865460000	887390000	995240000	0	0	0	0	0	0	18563000	10114000	0	0	876600000	1078500000	1138700000	0.0115378	0	0	1.83538	0	0	0	0	0	0	234260000	547210000	689590000	0	0	0	0	0	0	5481000	7763300	5166300	5274300	747130000	737750000	625580000	0.0103908
Small nuclear ribonucleoprotein Sm D2	SNRPD2		43774000	0	11051000	0	865460000	887390000	995240000	0	0.0124534	0	∞	∞	∞	12619000	0	0	5227700	876600000	1078500000	1138700000	0	0	0.00459094	∞	0	0	12971000	0	0	0	234260000	547210000	689590000	0	0	0	∞	0	0	9154300	3868500	3056100	1134700	747130000	737750000	625580000	0.00517781
Heterogeneous nuclear ribonucleoprotein F;Heterogeneous nuclear ribonucleoprotein F, N-terminally processed	HNRNPF		0	6447600	7412500	6900600	865460000	887390000	995240000	0.00744991	0.00835315	0.0069336	0	1.20473	1.12124	0	0	0	0	876600000	1078500000	1138700000	0	0	0	0	0	0	0	0	0	0	234260000	547210000	689590000	0	0	0	0	0	0	0	2709000	3156400	1223600	747130000	737750000	625580000	0.00362588
Vinculin	VCL		17888000	0	0	3560600	865460000	887390000	995240000	0	0	0.00357763	∞	0	0	51395000	24803000	41420000	0	876600000	1078500000	1138700000	0.0282945	0.0384052	0	2.07213	∞	1.35734	0	0	0	0	234260000	547210000	689590000	0	0	0	0	0	0	28067000	4844900	19007000	17092000	747130000	737750000	625580000	0.00648468
SCY1-like protein 2	SCYL2		24795000	536320000	138080000	175220000	865460000	887390000	995240000	0.619694	0.155602	0.176058	0.0462317	0.883813	0.251096	166740000	75131000	123860000	136910000	876600000	1078500000	1138700000	0.0857073	0.114845	0.120234	2.21932	0.95518	1.33996	75782000	284850000	123600000	150780000	234260000	547210000	689590000	1.21596	0.225873	0.218652	0.266042	1.03303	0.185758	0	4445500	7363000	7398800	747130000	737750000	625580000	0.0059501
Fructose-bisphosphate aldolase A	ALDOA		38288000	39486000	16421000	0	865460000	887390000	995240000	0.0456243	0.0185048	0	0.96966	∞	0.405592	136000000	148270000	198640000	23164000	876600000	1078500000	1138700000	0.169142	0.184182	0.0203425	0.917246	9.05404	1.08892	153000000	26127000	33018000	0	234260000	547210000	689590000	0.11153	0.0603388	0	5.85601	∞	0.54101	28425000	12949000	37018000	28373000	747130000	737750000	625580000	0.0173317
Importin-5	IPO5		0	68458000	0	21289000	865460000	887390000	995240000	0.0791001	0	0.0213908	0	0	0	37008000	0	24690000	0	876600000	1078500000	1138700000	0	0.0228929	0	∞	∞	∞	73703000	0	0	22501000	234260000	547210000	689590000	0	0	0.0326295	∞	0	0	30893000	19782000	0	18974000	747130000	737750000	625580000	0.0264773
Dual specificity testis-specific protein kinase 2	TESK2		0	88891000	0	0	865460000	887390000	995240000	0.10271	0	0	0	0	0	0	0	0	0	876600000	1078500000	1138700000	0	0	0	0	0	0	0	0	0	0	234260000	547210000	689590000	0	0	0	0	0	0	0	3548100	4210900	4426200	747130000	737750000	625580000	0.00474897
Protein S100-A11;Protein S100-A11, N-terminally processed	S100A11		0	11684000	0	0	865460000	887390000	995240000	0.0135003	0	0	0	0	0	33577000	0	0	0	876600000	1078500000	1138700000	0	0	0	∞	0	0	0	0	0	0	234260000	547210000	689590000	0	0	0	0	0	0	6241600	0	7769300	6421800	747130000	737750000	625580000	0
WD repeat domain phosphoinositide-interacting protein 1	WIPI1		0	0	0	21162000	865460000	887390000	995240000	0	0	0.0212632	0	0	0	15029000	0	53870000	16188000	876600000	1078500000	1138700000	0	0.049949	0.0142162	∞	3.51352	∞	0	66526000	26268000	10809000	234260000	547210000	689590000	0.283984	0.0480035	0.0156745	0	3.06252	0.169036	0	6306800	0	0	747130000	737750000	625580000	0.00844137
Importin-8	IPO8		0	0	0	0	865460000	887390000	995240000	0	0	0	0	0	0	0	0	0	79609000	876600000	1078500000	1138700000	0	0	0.0699122	0	0	0	0	0	0	0	234260000	547210000	689590000	0	0	0	0	0	0	6545700	8692700	2280600	3862300	747130000	737750000	625580000	0.0116348
40S ribosomal protein SA	RPSA		7520200	11136000	0	0	865460000	887390000	995240000	0.0128671	0	0	0.675305	0	0	20094000	0	0	0	876600000	1078500000	1138700000	0	0	0	∞	0	0	19115000	0	0	0	234260000	547210000	689590000	0	0	0	∞	0	0	4782800	3208200	9959600	6783300	747130000	737750000	625580000	0.00429403
Spindlin-1	SPIN1		12895000	33376000	0	10821000	865460000	887390000	995240000	0.0385645	0	0.0108728	0.386355	0	0	33367000	9322900	6421100	10645000	876600000	1078500000	1138700000	0.0106353	0.00595373	0.00934838	3.57904	0.636873	0.559809	0	6816800	0	21585000	234260000	547210000	689590000	0.0290993	0	0.0313012	0	0	0	3074800	5866200	2838400	3375700	747130000	737750000	625580000	0.00785165
Mitochondrial carrier homolog 2	MTCH2		0	0	0	0	865460000	887390000	995240000	0	0	0	0	0	0	0	0	0	0	876600000	1078500000	1138700000	0	0	0	0	0	0	0	0	0	0	234260000	547210000	689590000	0	0	0	0	0	0	17050000	5179700	9470900	6342000	747130000	737750000	625580000	0.0069328
Nucleoside diphosphate kinase A;Nucleoside diphosphate kinase B	NME1;NME2		0	13411000	0	0	865460000	887390000	995240000	0.0154958	0	0	0	0	0	0	12974000	15526000	0	876600000	1078500000	1138700000	0.0148004	0.0143959	0	0	∞	0.972673	34205000	0	0	0	234260000	547210000	689590000	0	0	0	∞	0	0	20369000	3487000	17415000	13263000	747130000	737750000	625580000	0.00466719
Tubulin beta-2B chain;Tubulin beta-2A chain	TUBB2B;TUBB2A		0	0	0	0	865460000	887390000	995240000	0	0	0	0	0	0	0	0	0	0	876600000	1078500000	1138700000	0	0	0	0	0	0	0	0	0	0	234260000	547210000	689590000	0	0	0	0	0	0	0	7699200	9403900	8167600	747130000	737750000	625580000	0.010305
H/ACA ribonucleoprotein complex subunit 1	GAR1		39769000	29880000	18466000	15281000	865460000	887390000	995240000	0.034525	0.0208093	0.0153541	1.33096	1.3553	0.602733	72156000	0	0	17194000	876600000	1078500000	1138700000	0	0	0.0150997	∞	0	0	0	17445000	0	11568000	234260000	547210000	689590000	0.0744685	0	0.0167752	0	0	0	7984300	8539300	4588600	5430200	747130000	737750000	625580000	0.0114295
14-3-3 protein epsilon	YWHAE		6998900	10803000	0	0	865460000	887390000	995240000	0.0124824	0	0	0.647866	0	0	0	45584000	0	0	876600000	1078500000	1138700000	0.0520009	0	0	0	0	0	0	0	0	0	234260000	547210000	689590000	0	0	0	0	0	0	39262000	0	29638000	17512000	747130000	737750000	625580000	0
UDP-glucose:glycoprotein glucosyltransferase 1	UGGT1		0	0	0	0	865460000	887390000	995240000	0	0	0	0	0	0	0	0	0	0	876600000	1078500000	1138700000	0	0	0	0	0	0	0	0	0	0	234260000	547210000	689590000	0	0	0	0	0	0	0	3696500	13891000	15792000	747130000	737750000	625580000	0.0049476
DnaJ homolog subfamily A member 1	DNAJA1		0	0	13030000	16983000	865460000	887390000	995240000	0	0.0146835	0.0170642	0	0.860485	∞	8150000	0	9431400	0	876600000	1078500000	1138700000	0	0.00874492	0	∞	∞	∞	0	9278600	0	8024800	234260000	547210000	689590000	0.0396081	0	0.0116371	0	0	0	6128900	10262000	8727200	0	747130000	737750000	625580000	0.0137352
Poly(rC)-binding protein 1	PCBP1		22317000	72004000	0	0	865460000	887390000	995240000	0.0831974	0	0	0.309941	0	0	84826000	9456700	9174200	0	876600000	1078500000	1138700000	0.0107879	0.00850644	0	8.96994	∞	0.788515	49044000	21044000	30117000	0	234260000	547210000	689590000	0.0898318	0.0550374	0	2.33055	∞	0.612671	31330000	10496000	4998100	3505300	747130000	737750000	625580000	0.0140484
14-3-3 protein zeta/delta	YWHAZ		38744000	6555100	0	5589100	865460000	887390000	995240000	0.00757412	0	0.00561583	5.91051	0	0	140810000	93530000	47774000	15555000	876600000	1078500000	1138700000	0.106696	0.0442967	0.0136603	1.50551	3.24273	0.415166	130500000	8750700	11405000	8223800	234260000	547210000	689590000	0.0373546	0.0208421	0.0119256	14.9131	1.74767	0.557952	78875000	10472000	33584000	33992000	747130000	737750000	625580000	0.0140163
26S proteasome non-ATPase regulatory subunit 2	PSMD2		7282600	8029300	11114000	13188000	865460000	887390000	995240000	0.00927749	0.0125244	0.0132511	0.907003	0.945159	1.34997	8441200	17407000	10528000	13539000	876600000	1078500000	1138700000	0.0198574	0.00976171	0.0118899	0.484931	0.82101	0.49159	0	17685000	0	13046000	234260000	547210000	689590000	0.075493	0	0.0189185	0	0	0	8277800	7118800	12762000	10352000	747130000	737750000	625580000	0.00952819
Cell division cycle 5-like protein	CDC5L		0	0	0	14275000	865460000	887390000	995240000	0	0	0.0143433	0	0	0	0	0	5500700	9125600	876600000	1078500000	1138700000	0	0.00510032	0.00801405	0	0.636423	∞	0	0	0	0	234260000	547210000	689590000	0	0	0	0	0	0	4953800	6913200	9031600	9844000	747130000	737750000	625580000	0.00925301
LIM domain and actin-binding protein 1	LIMA1		6443200	239670000	95494000	40533000	865460000	887390000	995240000	0.276928	0.107612	0.0407269	0.0268836	2.64229	0.388593	5672600	0	60514000	0	876600000	1078500000	1138700000	0	0.0561094	0	∞	∞	∞	15703000	178180000	62490000	222160000	234260000	547210000	689590000	0.760608	0.114197	0.322162	0.08813	0.354472	0.15014	5259800	13103000	11974000	7959300	747130000	737750000	625580000	0.0175378
Calcium-binding mitochondrial carrier protein SCaMC-1	SLC25A24		0	0	0	0	865460000	887390000	995240000	0	0	0	0	0	0	0	0	0	0	876600000	1078500000	1138700000	0	0	0	0	0	0	0	0	0	0	234260000	547210000	689590000	0	0	0	0	0	0	7360000	7584600	7560200	8395800	747130000	737750000	625580000	0.0101516
Heat shock protein HSP 90-alpha	HSP90AA1		8046000	0	13717000	0	865460000	887390000	995240000	0	0.0154577	0	∞	∞	∞	20419000	15717000	16025000	0	876600000	1078500000	1138700000	0.0179295	0.0148586	0	1.29917	∞	0.828724	23431000	0	0	0	234260000	547210000	689590000	0	0	0	∞	0	0	13883000	0	10921000	4726700	747130000	737750000	625580000	0
Phosphoglycerate mutase 1	PGAM1		15434000	11579000	7259500	0	865460000	887390000	995240000	0.013379	0.00818073	0	1.33293	∞	0.61146	94462000	17270000	0	0	876600000	1078500000	1138700000	0.0197011	0	0	5.46972	0	0	10050000	0	0	0	234260000	547210000	689590000	0	0	0	∞	0	0	30071000	12234000	28683000	25057000	747130000	737750000	625580000	0.0163747
Polypyrimidine tract-binding protein 1	PTBP1		6652600	0	0	12865000	865460000	887390000	995240000	0	0	0.0129265	∞	0	0	33681000	0	0	9561700	876600000	1078500000	1138700000	0	0	0.00839703	∞	0	0	0	0	0	11737000	234260000	547210000	689590000	0	0	0.0170203	0	0	0	8792100	7295300	16959000	10422000	747130000	737750000	625580000	0.00976443
Plasminogen;Plasmin heavy chain A;Activation peptide;Angiostatin;Plasmin heavy chain A, short form;Plasmin light chain B	PLG		21851000	53900000	28629000	26074000	865460000	887390000	995240000	0.062279	0.032262	0.0261987	0.405399	1.23144	0.518024	0	57851000	25027000	11421000	876600000	1078500000	1138700000	0.0659948	0.0232054	0.0100299	0	2.31363	0.351625	79805000	0	0	13970000	234260000	547210000	689590000	0	0	0.0202584	∞	0	0	6322400	6584400	10492000	9785500	747130000	737750000	625580000	0.00881292
S-phase kinase-associated protein 1	SKP1		0	0	0	0	865460000	887390000	995240000	0	0	0	0	0	0	0	0	0	422280	876600000	1078500000	1138700000	0	0	0.000370844	0	0	0	0	0	0	4717700	234260000	547210000	689590000	0	0	0.00684131	0	0	0	11746000	7834300	0	10553000	747130000	737750000	625580000	0.0104859
F-actin-capping protein subunit alpha-1;F-actin-capping protein subunit alpha-2	CAPZA1;CAPZA2		12470000	20312000	13487000	9262300	865460000	887390000	995240000	0.0234696	0.0151985	0.0093066	0.613923	1.63309	0.647583	29668000	0	22934000	18002000	876600000	1078500000	1138700000	0	0.0212647	0.0158093	∞	1.34508	∞	0	21170000	14182000	17280000	234260000	547210000	689590000	0.0903697	0.0259169	0.0250584	0	1.03426	0.286788	16512000	5845800	7308000	5597700	747130000	737750000	625580000	0.00782434
Filamin-A	FLNA		30402000	28825000	0	17470000	865460000	887390000	995240000	0.033306	0	0.0175536	1.05471	0	0	103270000	52286000	8335300	23170000	876600000	1078500000	1138700000	0.0596464	0.0077286	0.0203478	1.9751	0.379826	0.129574	14238000	67683000	12188000	19325000	234260000	547210000	689590000	0.288923	0.022273	0.0280239	0.210363	0.794785	0.0770898	7922000	0	5685100	1749300	747130000	737750000	625580000	0
Drebrin	DBN1		0	326990000	68932000	53989000	865460000	887390000	995240000	0.377822	0.0776795	0.0542472	0	1.43195	0.205598	0	45660000	60722000	16318000	876600000	1078500000	1138700000	0.0520876	0.0563023	0.0143304	0	3.92888	1.08091	0	508560000	41734000	387870000	234260000	547210000	689590000	2.17092	0.0762669	0.562465	0	0.135594	0.0351311	99909000	13544000	14945000	4924600	747130000	737750000	625580000	0.018128
Small nuclear ribonucleoprotein-associated protein N;Small nuclear ribonucleoprotein-associated proteins B and B	SNRPN;SNRPB		61800000	28591000	22642000	67763000	865460000	887390000	995240000	0.0330356	0.0255153	0.0680871	2.16152	0.374745	0.772357	110170000	58433000	55810000	62060000	876600000	1078500000	1138700000	0.0666587	0.0517478	0.0545007	1.88541	0.949488	0.77631	112110000	51717000	36061000	37309000	234260000	547210000	689590000	0.220768	0.0658997	0.0541032	2.16776	1.21804	0.298503	16298000	7750800	8149100	9120300	747130000	737750000	625580000	0.0103741
Serine/threonine-protein phosphatase 2A 55 kDa regulatory subunit B beta isoform;Serine/threonine-protein phosphatase 2A 55 kDa regulatory subunit B alpha isoform;Serine/threonine-protein phosphatase 2A 55 kDa regulatory subunit B delta isoform	PPP2R2B;PPP2R2A;PPP2R2D		0	0	0	0	865460000	887390000	995240000	0	0	0	0	0	0	4979700	0	0	0	876600000	1078500000	1138700000	0	0	0	∞	0	0	0	0	0	0	234260000	547210000	689590000	0	0	0	0	0	0	0	3446100	3278000	3812900	747130000	737750000	625580000	0.00461245
DNA damage-binding protein 1	DDB1		0	0	0	0	865460000	887390000	995240000	0	0	0	0	0	0	7853900	0	4697000	0	876600000	1078500000	1138700000	0	0.00435512	0	∞	∞	∞	0	0	0	0	234260000	547210000	689590000	0	0	0	0	0	0	12236000	9690300	4483200	4819800	747130000	737750000	625580000	0.01297
Eukaryotic translation initiation factor 2 subunit 1	EIF2S1		18619000	86559000	69301000	59270000	865460000	887390000	995240000	0.100015	0.0780953	0.0595535	0.215102	1.31135	0.780836	39039000	42527000	47186000	4435600	876600000	1078500000	1138700000	0.0485136	0.0437515	0.00389532	0.917982	11.2318	0.90184	0	4219000	0	40781000	234260000	547210000	689590000	0.0180099	0	0.059138	0	0	0	12861000	19123000	20214000	8232800	747130000	737750000	625580000	0.0255953
Glucose-induced degradation protein 8 homolog	GID8		0	11377000	6701800	17894000	865460000	887390000	995240000	0.0131456	0.00755226	0.0179796	0	0.420046	0.574508	9822800	12394000	0	12096000	876600000	1078500000	1138700000	0.0141387	0	0.0106226	0.792545	0	0	0	39276000	8322200	13997000	234260000	547210000	689590000	0.16766	0.0152084	0.0202976	0	0.749273	0.09071	0	9979600	10217000	7230500	747130000	737750000	625580000	0.0133572
Elongation factor 1-gamma	EEF1G		4184500	18550000	21116000	9799800	865460000	887390000	995240000	0.0214337	0.0237956	0.00984667	0.22558	2.41662	1.1102	15670000	34455000	22075000	17197000	876600000	1078500000	1138700000	0.0393053	0.0204682	0.0151023	0.454796	1.35531	0.520751	44060000	16064000	0	9476200	234260000	547210000	689590000	0.0685734	0	0.0137418	2.74278	0	0	19689000	5837100	28462000	17185000	747130000	737750000	625580000	0.0078127
Fragile X mental retardation syndrome-related protein 1	FXR1		0	0	0	3915200	865460000	887390000	995240000	0	0	0.00393393	0	0	0	0	0	0	0	876600000	1078500000	1138700000	0	0	0	0	0	0	0	0	0	0	234260000	547210000	689590000	0	0	0	0	0	0	6539300	19299000	16560000	20010000	747130000	737750000	625580000	0.0258308
Sin3 histone deacetylase corepressor complex component SDS3	SUDS3		0	0	0	0	865460000	887390000	995240000	0	0	0	0	0	0	0	0	0	0	876600000	1078500000	1138700000	0	0	0	0	0	0	0	0	0	0	234260000	547210000	689590000	0	0	0	0	0	0	0	16363000	16720000	12865000	747130000	737750000	625580000	0.0219011
Transcription initiation factor TFIID subunit 4	TAF4		18694000	0	0	0	865460000	887390000	995240000	0	0	0	∞	0	0	90001000	12726000	0	6907900	876600000	1078500000	1138700000	0.0145175	0	0.00606648	7.07221	0	0	39267000	0	0	0	234260000	547210000	689590000	0	0	0	∞	0	0	4414900	8954800	14679000	14125000	747130000	737750000	625580000	0.0119856
60 kDa heat shock protein, mitochondrial	HSPD1		20793000	33357000	14133000	10104000	865460000	887390000	995240000	0.0385425	0.0159265	0.0101523	0.623347	1.56875	0.413219	73796000	48148000	44296000	21639000	876600000	1078500000	1138700000	0.0549258	0.0410719	0.0190032	1.53269	2.16131	0.747769	19597000	22778000	0	0	234260000	547210000	689590000	0.0972338	0	0	0.860348	0	0	52588000	8021800	30397000	37916000	747130000	737750000	625580000	0.0107368
Non-POU domain-containing octamer-binding protein	NONO		0	0	0	11696000	865460000	887390000	995240000	0	0	0.0117519	0	0	0	23735000	0	0	13522000	876600000	1078500000	1138700000	0	0	0.0118749	∞	0	0	0	22339000	0	0	234260000	547210000	689590000	0.0953599	0	0	0	0	0	14762000	10888000	8460400	10803000	747130000	737750000	625580000	0.0145731
60S ribosomal protein L5	RPL5		27501000	45957000	24410000	0	865460000	887390000	995240000	0.0531012	0.0275076	0	0.598407	∞	0.518022	33026000	13088000	0	5683800	876600000	1078500000	1138700000	0.0149304	0	0.00499148	2.52338	0	0	22190000	9971000	17666000	0	234260000	547210000	689590000	0.0425638	0.0322838	0	2.22545	∞	0.758479	5309600	11557000	6466500	3520500	747130000	737750000	625580000	0.0154685
ADP/ATP translocase 1	SLC25A4		0	40632000	0	10983000	865460000	887390000	995240000	0.0469484	0	0.0110355	0	0	0	11347000	10798000	0	11539000	876600000	1078500000	1138700000	0.012318	0	0.0101335	1.05084	0	0	61269000	41207000	20356000	16747000	234260000	547210000	689590000	0.175903	0.0371996	0.0242854	1.48686	1.53177	0.211478	15452000	17100000	24736000	23339000	747130000	737750000	625580000	0.0228876
UBX domain-containing protein 1	UBXN1		0	0	0	0	865460000	887390000	995240000	0	0	0	0	0	0	0	0	0	0	876600000	1078500000	1138700000	0	0	0	0	0	0	0	0	0	0	234260000	547210000	689590000	0	0	0	0	0	0	20440000	14355000	14884000	13256000	747130000	737750000	625580000	0.0192135
Tricarboxylate transport protein, mitochondrial	SLC25A1		0	11736000	0	0	865460000	887390000	995240000	0.0135604	0	0	0	0	0	0	8250800	0	9540100	876600000	1078500000	1138700000	0.00941227	0	0.00837806	0	0	0	6277400	9190100	0	0	234260000	547210000	689590000	0.0392303	0	0	0.683061	0	0	0	8752100	16515000	15654000	747130000	737750000	625580000	0.0117143
60S ribosomal protein L36	RPL36		0	0	0	0	865460000	887390000	995240000	0	0	0	0	0	0	19028000	0	0	0	876600000	1078500000	1138700000	0	0	0	∞	0	0	0	0	0	0	234260000	547210000	689590000	0	0	0	0	0	0	7391600	10735000	9975500	10131000	747130000	737750000	625580000	0.0143683
Histone deacetylase 2	HDAC2		0	0	0	0	865460000	887390000	995240000	0	0	0	0	0	0	0	16959000	10047000	0	876600000	1078500000	1138700000	0.0193463	0.00931572	0	0	∞	0.481523	0	0	0	0	234260000	547210000	689590000	0	0	0	0	0	0	1507400	15633000	11122000	14090000	747130000	737750000	625580000	0.0209241
Aldo-keto reductase family 1 member B10	AKR1B10		19735000	87443000	23753000	28548000	865460000	887390000	995240000	0.101036	0.0267673	0.0286845	0.22569	0.93316	0.264927	49989000	90407000	95617000	0	876600000	1078500000	1138700000	0.103134	0.0886574	0	0.552933	∞	0.859636	159080000	0	9624600	0	234260000	547210000	689590000	0	0.0175885	0	∞	∞	∞	13358000	3215700	41012000	31217000	747130000	737750000	625580000	0.00430407
Protein SGT1	ECD		0	0	0	0	865460000	887390000	995240000	0	0	0	0	0	0	0	0	0	0	876600000	1078500000	1138700000	0	0	0	0	0	0	0	0	0	0	234260000	547210000	689590000	0	0	0	0	0	0	8949600	14636000	8459100	6919000	747130000	737750000	625580000	0.0195896
40S ribosomal protein S2	RPS2		0	12556000	0	0	865460000	887390000	995240000	0.0145079	0	0	0	0	0	0	0	0	0	876600000	1078500000	1138700000	0	0	0	0	0	0	0	0	0	0	234260000	547210000	689590000	0	0	0	0	0	0	26399000	6781600	14830000	13800000	747130000	737750000	625580000	0.00907687
Protein S100-A10	S100A10		0	24851000	0	11297000	865460000	887390000	995240000	0.0287142	0	0.011351	0	0	0	41545000	37534000	18778000	19676000	876600000	1078500000	1138700000	0.0428177	0.0174112	0.0172794	1.10686	1.00763	0.406636	29256000	21726000	0	0	234260000	547210000	689590000	0.0927431	0	0	1.34659	0	0	27638000	21439000	0	0	747130000	737750000	625580000	0.0286951
Importin-7	IPO7		0	21493000	0	23354000	865460000	887390000	995240000	0.0248342	0	0.0234657	0	0	0	5673100	15733000	18427000	31963000	876600000	1078500000	1138700000	0.0179478	0.0170858	0.0280697	0.360586	0.60869	0.951973	0	0	9453500	12118000	234260000	547210000	689590000	0	0.0172758	0.0175728	0	0.983102	∞	34646000	37333000	43538000	43863000	747130000	737750000	625580000	0.0499685
40S ribosomal protein S3	RPS3		17835000	21337000	0	19379000	865460000	887390000	995240000	0.0246539	0	0.0194717	0.835872	0	0	79426000	41102000	29693000	23500000	876600000	1078500000	1138700000	0.046888	0.0275318	0.0206376	1.93241	1.33406	0.587182	58062000	22796000	0	18544000	234260000	547210000	689590000	0.0973107	0	0.0268913	2.54703	0	0	35005000	16485000	21868000	8198300	747130000	737750000	625580000	0.0220644
Tubulin alpha-1A chain;Tubulin alpha-3C/D chain;Tubulin alpha-3E chain	TUBA1A;TUBA3C;TUBA3E		22980000	85843000	25123000	40364000	865460000	887390000	995240000	0.0991877	0.0283111	0.0405571	0.267698	0.698057	0.28543	63713000	61849000	41504000	49138000	876600000	1078500000	1138700000	0.0705556	0.0384831	0.0431527	1.03014	0.891788	0.545429	64434000	128360000	27928000	52182000	234260000	547210000	689590000	0.547938	0.0510371	0.0756711	0.501979	0.67446	0.0931439	18689000	38301000	28740000	28058000	747130000	737750000	625580000	0.0512642
SUN domain-containing protein 2	SUN2		45226000	19684000	7867000	13193000	865460000	887390000	995240000	0.022744	0.00886532	0.0132561	2.2976	0.668773	0.389788	74042000	22045000	18565000	11834000	876600000	1078500000	1138700000	0.0251483	0.0172137	0.0103926	3.35868	1.65635	0.684489	29690000	36054000	6593000	0	234260000	547210000	689590000	0.153906	0.0120484	0	0.823487	∞	0.0782841	20627000	15280000	15434000	8544500	747130000	737750000	625580000	0.0204516
60S ribosomal protein L14	RPL14		33895000	0	10948000	24583000	865460000	887390000	995240000	0	0.0123373	0.0247006	∞	0.499474	∞	70498000	14412000	43886000	36591000	876600000	1078500000	1138700000	0.0164408	0.0406917	0.032134	4.89162	1.26631	2.47504	0	27513000	43229000	23440000	234260000	547210000	689590000	0.117446	0.0789989	0.0339912	0	2.3241	0.672638	29880000	33306000	25130000	21720000	747130000	737750000	625580000	0.0445786
Nucleophosmin	NPM1		17141000	43879000	24233000	0	865460000	887390000	995240000	0.0507002	0.0273082	0	0.390642	∞	0.538621	110630000	116670000	38112000	0	876600000	1078500000	1138700000	0.133094	0.035338	0	0.94823	∞	0.265512	130520000	16030000	32758000	9331100	234260000	547210000	689590000	0.0684282	0.0598637	0.0135314	8.14223	4.42406	0.874839	33161000	23595000	17339000	23178000	747130000	737750000	625580000	0.0315808
Protein S100-A6	S100A6		90854000	128330000	111380000	51175000	865460000	887390000	995240000	0.14828	0.125514	0.0514198	0.707972	2.44097	0.84647	217420000	124690000	27796000	40296000	876600000	1078500000	1138700000	0.142243	0.0257728	0.0353877	1.74368	0.728299	0.181189	111410000	146140000	22873000	58806000	234260000	547210000	689590000	0.623837	0.0417993	0.0852768	0.762351	0.490161	0.0670036	43254000	22033000	28533000	81779000	747130000	737750000	625580000	0.0294902
OTU domain-containing protein 4	OTUD4		57010000	3330800	5563400	5033500	865460000	887390000	995240000	0.00384859	0.0062694	0.00505757	17.116	1.23961	1.62901	158070000	0	0	0	876600000	1078500000	1138700000	0	0	0	∞	0	0	11545000	6797200	0	0	234260000	547210000	689590000	0.0290156	0	0	1.69849	0	0	10146000	27242000	15916000	11428000	747130000	737750000	625580000	0.0364622
T-complex protein 1 subunit zeta-2	CCT6B		2120700	61463000	43228000	69098000	865460000	887390000	995240000	0.0710177	0.0487136	0.0694285	0.0345037	0.701638	0.685936	17257000	0	43514000	87891000	876600000	1078500000	1138700000	0	0.0403468	0.0771854	∞	0.522726	∞	20153000	48210000	29914000	66703000	234260000	547210000	689590000	0.205797	0.0546664	0.0967285	0.418025	0.565153	0.265633	5923000	15232000	29593000	37965000	747130000	737750000	625580000	0.0203873
40S ribosomal protein S27-like;40S ribosomal protein S27	RPS27L;RPS27		0	24104000	0	15473000	865460000	887390000	995240000	0.0278511	0	0.015547	0	0	0	37356000	18268000	16358000	0	876600000	1078500000	1138700000	0.0208396	0.0151674	0	2.04489	∞	0.727814	0	0	0	9104900	234260000	547210000	689590000	0	0	0.0132034	0	0	0	37037000	12191000	3166200	22214000	747130000	737750000	625580000	0.0163171
RNA polymerase II elongation factor ELL	ELL		0	21103000	0	0	865460000	887390000	995240000	0.0243836	0	0	0	0	0	24041000	13583000	16409000	0	876600000	1078500000	1138700000	0.0154951	0.0152146	0	1.76993	∞	0.981901	17886000	8633100	11035000	0	234260000	547210000	689590000	0.0368526	0.0201659	0	2.07179	∞	0.547205	5319800	15622000	12170000	16488000	747130000	737750000	625580000	0.0209093
Transgelin-2	TAGLN2		48298000	89248000	31202000	10819000	865460000	887390000	995240000	0.103122	0.0351615	0.0108707	0.541166	3.23451	0.34097	194960000	68646000	78705000	17676000	876600000	1078500000	1138700000	0.0783094	0.0729764	0.015523	2.84008	4.70119	0.931898	130270000	17888000	0	9483000	234260000	547210000	689590000	0.0763596	0	0.0137516	7.28254	0	0	68367000	14738000	40936000	36231000	747130000	737750000	625580000	0.0197262
Unconventional myosin-XVIIIa	MYO18A		15150000	129060000	39195000	159260000	865460000	887390000	995240000	0.149123	0.0441689	0.160022	0.117387	0.276018	0.296191	164500000	171420000	71465000	144970000	876600000	1078500000	1138700000	0.195551	0.0662633	0.127312	0.959631	0.52048	0.338854	53691000	119920000	22529000	41186000	234260000	547210000	689590000	0.51191	0.0411707	0.0597253	0.447723	0.689333	0.0804256	25002000	13237000	26039000	6922700	747130000	737750000	625580000	0.0177171
ATP synthase subunit alpha, mitochondrial	ATP5A1		59432000	127710000	38909000	51234000	865460000	887390000	995240000	0.147563	0.0438466	0.051479	0.465367	0.851736	0.297138	124690000	138470000	155370000	59821000	876600000	1078500000	1138700000	0.157963	0.144061	0.0525345	0.900484	2.74222	0.911996	131310000	57178000	31843000	97751000	234260000	547210000	689590000	0.244079	0.0581916	0.141752	2.29651	0.410516	0.238413	40881000	15536000	58799000	40561000	747130000	737750000	625580000	0.0207942
60S ribosomal protein L23	RPL23		41839000	57719000	30277000	0	865460000	887390000	995240000	0.0666917	0.0341192	0	0.724874	∞	0.511595	112490000	22942000	0	25152000	876600000	1078500000	1138700000	0.0261716	0	0.0220883	4.90323	0	0	20277000	6057500	0	0	234260000	547210000	689590000	0.025858	0	0	3.34742	0	0	33807000	21820000	29898000	36751000	747130000	737750000	625580000	0.0292051
Leucine-rich repeat and calponin homology domain-containing protein 3	LRCH3		0	33865000	4761900	31649000	865460000	887390000	995240000	0.0391295	0.00536619	0.0318004	0	0.168746	0.137139	9929500	7676300	0	13667000	876600000	1078500000	1138700000	0.0087569	0	0.0120023	1.29353	0	0	41622000	8719100	11302000	30798000	234260000	547210000	689590000	0.0372198	0.0206539	0.0446613	4.77366	0.462455	0.554917	6017700	32139000	29980000	22416000	747130000	737750000	625580000	0.0430166
40S ribosomal protein S4, X isoform	RPS4X		11599000	12377000	14241000	4675000	865460000	887390000	995240000	0.0143011	0.0160482	0.00469736	0.937141	3.41643	1.12217	35857000	13966000	16606000	14314000	876600000	1078500000	1138700000	0.015932	0.0153973	0.0125705	2.56745	1.22488	0.966439	0	4288800	9170800	0	234260000	547210000	689590000	0.0183079	0.0167592	0	0	∞	0.91541	29288000	35071000	30355000	39263000	747130000	737750000	625580000	0.046941
Thymidylate synthase	TYMS		57683000	20506000	0	5624500	865460000	887390000	995240000	0.0236938	0	0.0056514	2.81298	0	0	154990000	26747000	22979000	13224000	876600000	1078500000	1138700000	0.0305122	0.0213064	0.0116132	5.79467	1.83467	0.698292	99606000	17894000	12221000	17036000	234260000	547210000	689590000	0.0763852	0.0223333	0.0247045	5.56645	0.904016	0.292377	49445000	28788000	31237000	24019000	747130000	737750000	625580000	0.0385314
L-lactate dehydrogenase A chain	LDHA		147570000	237030000	13753000	44506000	865460000	887390000	995240000	0.273877	0.0154983	0.0447189	0.622579	0.346571	0.0565883	539950000	373910000	371540000	135580000	876600000	1078500000	1138700000	0.426546	0.344497	0.119066	1.44406	2.89334	0.807644	435160000	110400000	82598000	45588000	234260000	547210000	689590000	0.471271	0.150944	0.0661088	3.94167	2.28326	0.320291	205720000	69095000	198450000	134290000	747130000	737750000	625580000	0.0924806
Engulfment and cell motility protein 2	ELMO2		20851000	50686000	31107000	8115200	865460000	887390000	995240000	0.0585654	0.0350545	0.00815401	0.411376	4.29905	0.598553	48158000	24701000	8005000	7573100	876600000	1078500000	1138700000	0.0281782	0.00742235	0.00665065	1.94964	1.11603	0.263407	0	0	0	6631500	234260000	547210000	689590000	0	0	0.00961658	0	0	0	20615000	18995000	16170000	15525000	747130000	737750000	625580000	0.025424
Eukaryotic translation initiation factor 2 subunit 3;Putative eukaryotic translation initiation factor 2 subunit 3-like protein	EIF2S3;EIF2S3L		48511000	205130000	12801000	38533000	865460000	887390000	995240000	0.237018	0.0144254	0.0387173	0.236489	0.372584	0.0608621	77364000	80536000	42230000	38158000	876600000	1078500000	1138700000	0.0918731	0.0391562	0.0335101	0.960614	1.16849	0.426199	0	18123000	10183000	14231000	234260000	547210000	689590000	0.0773628	0.0186089	0.0206369	0	0.901732	0.240541	34313000	23816000	30899000	18222000	747130000	737750000	625580000	0.0318766
ATP synthase subunit beta, mitochondrial	ATP5B		9532300	105410000	0	29360000	865460000	887390000	995240000	0.121797	0	0.0295004	0.0904307	0	0	54376000	74723000	99485000	47920000	876600000	1078500000	1138700000	0.0852418	0.0922439	0.0420831	0.727701	2.19195	1.08214	44095000	38328000	0	26432000	234260000	547210000	689590000	0.163613	0	0.03833	1.15046	0	0	77009000	31435000	68357000	55352000	747130000	737750000	625580000	0.0420743
14-3-3 protein theta	YWHAQ		43982000	48267000	0	0	865460000	887390000	995240000	0.0557703	0	0	0.911223	0	0	109750000	72502000	38696000	0	876600000	1078500000	1138700000	0.0827082	0.0358795	0	1.51375	∞	0.433808	140740000	42924000	17833000	0	234260000	547210000	689590000	0.183232	0.032589	0	3.27882	∞	0.177856	46479000	38115000	45397000	16600000	747130000	737750000	625580000	0.0510152
Eukaryotic translation initiation factor 2-alpha kinase 3	EIF2AK3		0	20279000	0	12893000	865460000	887390000	995240000	0.0234315	0	0.0129547	0	0	0	0	14400000	11151000	11225000	876600000	1078500000	1138700000	0.0164271	0.0103394	0.00985773	0	1.04886	0.629409	0	0	0	0	234260000	547210000	689590000	0	0	0	0	0	0	7892400	23032000	19862000	26466000	747130000	737750000	625580000	0.0308273
ATP-dependent RNA helicase DDX3X;ATP-dependent RNA helicase DDX3Y	DDX3X;DDX3Y		7499300	29513000	4514300	25030000	865460000	887390000	995240000	0.0341009	0.00508717	0.0251497	0.254102	0.202275	0.14918	57801000	0	9386000	26283000	876600000	1078500000	1138700000	0	0.00870283	0.0230816	∞	0.377046	∞	14023000	31051000	2734300	41933000	234260000	547210000	689590000	0.132549	0.0049968	0.0608086	0.451612	0.0821726	0.0376977	34772000	38472000	38853000	23743000	747130000	737750000	625580000	0.051493
Aldo-keto reductase family 1 member B15	AKR1B15		85300000	231290000	48228000	73199000	865460000	887390000	995240000	0.267245	0.0543481	0.0735491	0.368801	0.738937	0.203364	186570000	54069000	262790000	146950000	876600000	1078500000	1138700000	0.0616804	0.243662	0.129051	3.45059	1.88811	3.95041	226300000	78167000	77299000	87172000	234260000	547210000	689590000	0.333676	0.14126	0.126411	2.89508	1.11746	0.423345	87503000	41165000	129680000	87806000	747130000	737750000	625580000	0.0550975
Small nuclear ribonucleoprotein Sm D3	SNRPD3		85462000	88443000	24418000	54694000	865460000	887390000	995240000	0.102192	0.0275166	0.0549556	0.966295	0.500707	0.269264	126770000	120540000	98486000	98382000	876600000	1078500000	1138700000	0.137509	0.0913176	0.0863985	1.05168	1.05693	0.664086	0	19100000	0	41725000	234260000	547210000	689590000	0.0815333	0	0.060507	0	0	0	33326000	18021000	29316000	32685000	747130000	737750000	625580000	0.0241203
Phosphate carrier protein, mitochondrial	SLC25A3		7058100	30699000	19486000	5983900	865460000	887390000	995240000	0.0354713	0.0219588	0.00601252	0.229913	3.65218	0.619057	0	21971000	10077000	7429100	876600000	1078500000	1138700000	0.0250639	0.00934353	0.00652419	0	1.43214	0.372789	26263000	0	0	0	234260000	547210000	689590000	0	0	0	∞	0	0	12984000	26318000	18705000	10327000	747130000	737750000	625580000	0.0352255
Heat shock protein HSP 90-beta	HSP90AB1		181760000	363660000	26043000	50318000	865460000	887390000	995240000	0.420193	0.0293479	0.0505587	0.499808	0.580472	0.0698438	604710000	284510000	212990000	100570000	876600000	1078500000	1138700000	0.324561	0.197487	0.08832	2.12544	2.23604	0.608475	317310000	78203000	57657000	33208000	234260000	547210000	689590000	0.33383	0.105365	0.0481562	4.05752	2.18799	0.315626	197210000	52409000	98066000	75630000	747130000	737750000	625580000	0.0701471
Ubiquitin carboxyl-terminal hydrolase 15	USP15		10498000	50295000	0	36969000	865460000	887390000	995240000	0.0581136	0	0.0371458	0.208729	0	0	30699000	9069000	14074000	30416000	876600000	1078500000	1138700000	0.0103457	0.0130496	0.0267112	3.38505	0.488545	1.26136	0	7773800	15348000	17945000	234260000	547210000	689590000	0.0331845	0.0280477	0.0260227	0	1.07782	0.845206	16118000	49268000	46653000	44573000	747130000	737750000	625580000	0.065943
Alpha-enolase	ENO1		25467000	136960000	24548000	26958000	865460000	887390000	995240000	0.158251	0.0276631	0.0270869	0.185945	1.02127	0.174805	361320000	130730000	195960000	33414000	876600000	1078500000	1138700000	0.149133	0.181697	0.029344	2.76386	6.19196	1.21835	90156000	25416000	34375000	35269000	234260000	547210000	689590000	0.108495	0.0628187	0.0511449	3.54721	1.22825	0.579001	238000000	64041000	140300000	140880000	747130000	737750000	625580000	0.085716
Glyceraldehyde-3-phosphate dehydrogenase	GAPDH		134880000	106550000	15615000	14680000	865460000	887390000	995240000	0.123114	0.0175965	0.0147502	1.26588	1.19297	0.142929	262290000	74819000	145120000	67760000	876600000	1078500000	1138700000	0.0853514	0.134557	0.0595065	3.50566	2.26122	1.57651	16021000	0	0	0	234260000	547210000	689590000	0	0	0	∞	0	0	37944000	23613000	53372000	62779000	747130000	737750000	625580000	0.0316049
Phosphoglycerate kinase 1	PGK1		128020000	138490000	30960000	20994000	865460000	887390000	995240000	0.160019	0.0348888	0.0210944	0.924399	1.65394	0.218029	382480000	144730000	306210000	167980000	876600000	1078500000	1138700000	0.165104	0.283922	0.147519	2.64271	1.92465	1.71966	159810000	16281000	10084000	18430000	234260000	547210000	689590000	0.0694997	0.018428	0.026726	9.81574	0.689516	0.265153	158590000	28087000	136900000	80589000	747130000	737750000	625580000	0.0375932
Influenza virus NS1A-binding protein	IVNS1ABP		0	40160000	19640000	0	865460000	887390000	995240000	0.0464031	0.0221323	0	0	∞	0.476958	22307000	72512000	5471700	35194000	876600000	1078500000	1138700000	0.0827196	0.00507344	0.0309072	0.307632	0.164151	0.0613329	0	43731000	0	0	234260000	547210000	689590000	0.186677	0	0	0	0	0	11785000	48175000	41136000	39530000	747130000	737750000	625580000	0.0644801
Ankycorbin	RAI14		13572000	82777000	87083000	26717000	865460000	887390000	995240000	0.0956451	0.0981339	0.0268448	0.163959	3.6556	1.02602	0	139310000	0	0	876600000	1078500000	1138700000	0.158921	0	0	0	0	0	0	0	0	0	234260000	547210000	689590000	0	0	0	0	0	0	32281000	42503000	44138000	55357000	747130000	737750000	625580000	0.0568884
Peroxiredoxin-5, mitochondrial	PRDX5		280190000	73610000	0	33733000	865460000	887390000	995240000	0.085053	0	0.0338943	3.80641	0	0	280480000	85796000	61769000	51773000	876600000	1078500000	1138700000	0.0978736	0.0572731	0.0454668	3.26915	1.25967	0.585174	103700000	99036000	27414000	33700000	234260000	547210000	689590000	0.422761	0.0500978	0.0488696	1.04709	1.02513	0.118501	76554000	56814000	87899000	82272000	747130000	737750000	625580000	0.076043
Tropomyosin alpha-4 chain	TPM4		0	87738000	43497000	38097000	865460000	887390000	995240000	0.101377	0.0490168	0.0382792	0	1.28051	0.483508	111540000	24329000	64930000	61100000	876600000	1078500000	1138700000	0.0277538	0.060204	0.0536577	4.58465	1.122	2.16921	7035000	83781000	40856000	57030000	234260000	547210000	689590000	0.357641	0.0746624	0.0827013	0.0839689	0.902796	0.208763	293500000	37850000	39761000	34289000	747130000	737750000	625580000	0.0506605
Importin-9	IPO9		0	75379000	65313000	102630000	865460000	887390000	995240000	0.087097	0.0736012	0.103121	0	0.713738	0.845049	85180000	128830000	130450000	127880000	876600000	1078500000	1138700000	0.146966	0.120955	0.112304	0.661181	1.07704	0.823016	88431000	62582000	24850000	0	234260000	547210000	689590000	0.267148	0.0454122	0	1.41304	∞	0.169989	82928000	59192000	56098000	60766000	747130000	737750000	625580000	0.0792258
40S ribosomal protein S6	RPS6		5969900	0	0	0	865460000	887390000	995240000	0	0	0	∞	0	0	24281000	0	0	9261900	876600000	1078500000	1138700000	0	0	0.00813375	∞	0	0	0	0	0	0	234260000	547210000	689590000	0	0	0	0	0	0	47302000	43295000	62494000	39277000	747130000	737750000	625580000	0.0579484
60S acidic ribosomal protein P2	RPLP2		25007000	59947000	0	0	865460000	887390000	995240000	0.0692661	0	0	0.417152	0	0	45140000	23294000	0	15254000	876600000	1078500000	1138700000	0.0265731	0	0.013396	1.93784	0	0	0	0	0	0	234260000	547210000	689590000	0	0	0	0	0	0	51848000	28232000	31022000	34625000	747130000	737750000	625580000	0.0377873
Elongation factor 2	EEF2		0	72969000	36192000	21004000	865460000	887390000	995240000	0.0843124	0.0407848	0.0211045	0	1.93252	0.483734	257760000	61690000	79858000	56419000	876600000	1078500000	1138700000	0.0703742	0.0740454	0.0495469	4.17831	1.49445	1.05217	37705000	11329000	0	5271600	234260000	547210000	689590000	0.0483608	0	0.00764454	3.32818	0	0	105930000	41407000	59655000	51461000	747130000	737750000	625580000	0.0554214
Cofilin-1	CFL1		158780000	381330000	63941000	94358000	865460000	887390000	995240000	0.44061	0.0720551	0.0948093	0.416385	0.760001	0.163535	564270000	202970000	162610000	135690000	876600000	1078500000	1138700000	0.231542	0.150774	0.119162	2.78007	1.26529	0.651173	374010000	166990000	38943000	79160000	234260000	547210000	689590000	0.71284	0.0711665	0.114793	2.23971	0.619956	0.0998351	145300000	49534000	89191000	91065000	747130000	737750000	625580000	0.066299
Girdin	CCDC88A		0	60269000	45240000	87180000	865460000	887390000	995240000	0.0696381	0.050981	0.087597	0	0.581995	0.732084	58821000	139490000	44346000	44915000	876600000	1078500000	1138700000	0.159126	0.0411182	0.0394441	0.421686	1.04244	0.2584	0	42716000	19869000	109720000	234260000	547210000	689590000	0.182344	0.0363096	0.159109	0	0.228206	0.199127	26720000	45849000	34846000	30533000	747130000	737750000	625580000	0.0613668
Pyruvate kinase PKM	PKM		106390000	166490000	11525000	28592000	865460000	887390000	995240000	0.192372	0.0129875	0.0287287	0.639017	0.452074	0.0675127	327130000	219650000	289840000	108480000	876600000	1078500000	1138700000	0.25057	0.268744	0.0952665	1.48932	2.82097	1.07253	195800000	78125000	16756000	96193000	234260000	547210000	689590000	0.333497	0.0306208	0.139493	2.50624	0.219515	0.0918173	270030000	70121000	220700000	159970000	747130000	737750000	625580000	0.0938538
60S ribosomal protein L13	RPL13		42211000	58459000	38502000	50902000	865460000	887390000	995240000	0.0675467	0.0433879	0.0511455	0.722062	0.848324	0.642339	159020000	49275000	84827000	44694000	876600000	1078500000	1138700000	0.0562115	0.0786528	0.03925	3.22719	2.00389	1.39923	109260000	36723000	14846000	31184000	234260000	547210000	689590000	0.156762	0.0271304	0.0452211	2.97525	0.599949	0.173067	51704000	66591000	21020000	17212000	747130000	737750000	625580000	0.0891291
Integrin alpha-3;Integrin alpha-3 heavy chain;Integrin alpha-3 light chain	ITGA3		0	161140000	0	13010000	865460000	887390000	995240000	0.18619	0	0.0130722	0	0	0	13901000	208360000	16842000	21132000	876600000	1078500000	1138700000	0.237691	0.0156161	0.018558	0.0667163	0.841477	0.0656993	184010000	40488000	38752000	41840000	234260000	547210000	689590000	0.172834	0.0708174	0.0606737	4.5448	1.16718	0.409743	20903000	53943000	78273000	80409000	747130000	737750000	625580000	0.0722003
ADP/ATP translocase 3;ADP/ATP translocase 3, N-terminally processed	SLC25A6		18316000	33072000	53660000	78341000	865460000	887390000	995240000	0.0382132	0.0604695	0.0787157	0.553822	0.768201	1.58242	0	26303000	43657000	49770000	876600000	1078500000	1138700000	0.0300057	0.0404794	0.0437077	0	0.926137	1.34906	0	28584000	15769000	28982000	234260000	547210000	689590000	0.122018	0.0288171	0.0420279	0	0.685666	0.23617	46354000	60718000	71433000	69974000	747130000	737750000	625580000	0.0812683
60S ribosomal protein L19	RPL19		38623000	48213000	54947000	22260000	865460000	887390000	995240000	0.0557079	0.0619198	0.0223665	0.801091	2.76842	1.11151	190940000	25720000	128260000	52394000	876600000	1078500000	1138700000	0.0293406	0.118924	0.0460121	7.42379	2.58463	4.05323	127590000	44668000	83824000	111700000	234260000	547210000	689590000	0.190677	0.153184	0.16198	2.85641	0.945697	0.803371	51556000	60958000	46626000	47447000	747130000	737750000	625580000	0.0815895
Beta/gamma crystallin domain-containing protein 3	CRYBG3		160520000	322270000	0	133260000	865460000	887390000	995240000	0.372368	0	0.133897	0.498092	0	0	491810000	610720000	260230000	153800000	876600000	1078500000	1138700000	0.696692	0.241289	0.135066	0.805295	1.78645	0.346335	417820000	0	8154000	51612000	234260000	547210000	689590000	0	0.014901	0.0748445	∞	0.199093	∞	193770000	62602000	218200000	150170000	747130000	737750000	625580000	0.08379
Heat shock 70 kDa protein 6;Putative heat shock 70 kDa protein 7	HSPA6;HSPA7		89263000	147030000	105070000	35287000	865460000	887390000	995240000	0.169887	0.118403	0.0354558	0.607107	3.33947	0.696956	255760000	106100000	150340000	32548000	876600000	1078500000	1138700000	0.121036	0.139397	0.0285835	2.41056	4.87685	1.1517	192070000	0	96276000	27820000	234260000	547210000	689590000	0	0.17594	0.0403428	∞	4.36112	∞	35914000	33203000	49203000	32601000	747130000	737750000	625580000	0.0444407
Polyadenylate-binding protein 1	PABPC1		45401000	35585000	18099000	17977000	865460000	887390000	995240000	0.0411169	0.0203958	0.018063	1.27585	1.12915	0.496044	86298000	59194000	51396000	4248900	876600000	1078500000	1138700000	0.0675268	0.0476551	0.00373136	1.45788	12.7715	0.705721	53382000	0	0	16769000	234260000	547210000	689590000	0	0	0.0243173	∞	0	0	89064000	70227000	57082000	39137000	747130000	737750000	625580000	0.0939957
Unconventional myosin-Ie	MYO1E		8874100	157120000	50376000	155340000	865460000	887390000	995240000	0.181545	0.0567687	0.156083	0.0564798	0.363709	0.312698	60180000	160790000	80392000	141130000	876600000	1078500000	1138700000	0.183425	0.0745406	0.12394	0.374277	0.601427	0.406383	55737000	78801000	29058000	141650000	234260000	547210000	689590000	0.336383	0.0531021	0.205412	0.707313	0.258515	0.157862	650350000	58057000	75348000	85369000	747130000	737750000	625580000	0.0777067
Actin, cytoplasmic 1;Actin, cytoplasmic 1, N-terminally processed	ACTB		78215000	716950000	81239000	468840000	865460000	887390000	995240000	0.828403	0.0915482	0.471082	0.109094	0.194336	0.110512	101620000	342910000	160240000	364840000	876600000	1078500000	1138700000	0.391182	0.148577	0.3204	0.296346	0.463722	0.379815	50042000	798340000	36366000	23945000	234260000	547210000	689590000	3.40792	0.0664571	0.0347235	0.0626826	1.91389	0.0195008	273780000	370920000	70859000	333740000	747130000	737750000	625580000	0.49646
60S ribosomal protein L24	RPL24		45598000	99937000	0	44547000	865460000	887390000	995240000	0.115473	0	0.0447601	0.456267	0	0	128980000	89310000	50558000	46536000	876600000	1078500000	1138700000	0.101882	0.0468781	0.0408677	1.44418	1.14707	0.46012	38099000	0	10717000	17894000	234260000	547210000	689590000	0	0.0195848	0.0259488	∞	0.754749	∞	56209000	69817000	58447000	58510000	747130000	737750000	625580000	0.0934469
60S ribosomal protein L38	RPL38		0	42155000	0	64397000	865460000	887390000	995240000	0.0487082	0	0.064705	0	0	0	79980000	0	53688000	53591000	876600000	1078500000	1138700000	0	0.0497803	0.0470633	∞	1.05773	∞	64876000	0	0	24494000	234260000	547210000	689590000	0	0	0.0355197	∞	0	0	50769000	58742000	62184000	58031000	747130000	737750000	625580000	0.0786235
Zinc finger CCCH domain-containing protein 7A	ZC3H7A		36784000	175550000	25189000	0	865460000	887390000	995240000	0.20284	0.0283855	0	0.209536	∞	0.13994	69794000	322040000	191690000	0	876600000	1078500000	1138700000	0.367374	0.177738	0	0.216725	∞	0.483806	12121000	0	146860000	11627000	234260000	547210000	689590000	0	0.26838	0.0168607	∞	15.9174	∞	36013000	59876000	57837000	48693000	747130000	737750000	625580000	0.0801413
60S ribosomal protein L6	RPL6		12849000	7236500	60177000	0	865460000	887390000	995240000	0.00836145	0.0678135	0	1.77558	∞	8.11025	54271000	9009800	9823400	6270600	876600000	1078500000	1138700000	0.0102781	0.00910839	0.00550681	6.02355	1.65402	0.886192	15636000	2475200	0	0	234260000	547210000	689590000	0.010566	0	0	6.31707	0	0	43328000	77779000	50531000	45926000	747130000	737750000	625580000	0.104104
40S ribosomal protein S9	RPS9		46787000	97047000	12369000	0	865460000	887390000	995240000	0.112133	0.0139386	0	0.482107	∞	0.124304	123940000	28831000	92945000	23011000	876600000	1078500000	1138700000	0.0328896	0.0861799	0.0202081	4.29884	4.26461	2.62028	57837000	23599000	7162200	0	234260000	547210000	689590000	0.100738	0.0130886	0	2.45082	∞	0.129926	79407000	80801000	83882000	81179000	747130000	737750000	625580000	0.108149
Serine/threonine-protein kinase RIO1	RIOK1		137850000	219270000	246780000	143830000	865460000	887390000	995240000	0.253357	0.278096	0.144518	0.628677	1.9243	1.09765	360570000	279430000	116800000	134490000	876600000	1078500000	1138700000	0.318766	0.108299	0.118108	1.29038	0.916942	0.339743	137230000	47001000	0	120420000	234260000	547210000	689590000	0.200636	0	0.174626	2.91973	0	0	98432000	84494000	84795000	72330000	747130000	737750000	625580000	0.113091
Major vault protein	MVP		44414000	122180000	65176000	86335000	865460000	887390000	995240000	0.141173	0.0734468	0.0867479	0.363513	0.84667	0.52026	105130000	67902000	26852000	88804000	876600000	1078500000	1138700000	0.0774606	0.0248975	0.0779872	1.54826	0.319252	0.321422	61084000	59069000	13913000	120890000	234260000	547210000	689590000	0.252151	0.0254253	0.175307	1.03411	0.145033	0.100834	82207000	51747000	53256000	31526000	747130000	737750000	625580000	0.069261
60S ribosomal protein L4	RPL4		8801400	73264000	33940000	35943000	865460000	887390000	995240000	0.0846532	0.038247	0.0361149	0.120133	1.05904	0.451808	81575000	13297000	27292000	72497000	876600000	1078500000	1138700000	0.0151688	0.0253055	0.0636665	6.13484	0.39747	1.66826	51449000	17061000	0	50450000	234260000	547210000	689590000	0.0728293	0	0.0731594	3.01559	0	0	56646000	105880000	55673000	80031000	747130000	737750000	625580000	0.141716
60S ribosomal protein L12	RPL12		122150000	120930000	8167100	23853000	865460000	887390000	995240000	0.139729	0.00920351	0.0239671	1.01009	0.384006	0.0658668	209800000	81312000	62954000	34263000	876600000	1078500000	1138700000	0.0927584	0.0583718	0.0300896	2.58018	1.93993	0.629289	152450000	0	0	15869000	234260000	547210000	689590000	0	0	0.0230122	∞	0	0	78622000	112080000	83540000	99308000	747130000	737750000	625580000	0.150014
Tropomyosin alpha-3 chain	TPM3		10502000	479530000	221140000	72238000	865460000	887390000	995240000	0.554075	0.249203	0.0725835	0.0219006	3.43332	0.449763	148130000	96162000	97299000	232890000	876600000	1078500000	1138700000	0.109699	0.090217	0.204523	1.54042	0.44111	0.822406	10138000	418000000	32587000	375560000	234260000	547210000	689590000	1.78434	0.0595512	0.544613	0.0242536	0.109346	0.0333743	430590000	124680000	128500000	101930000	747130000	737750000	625580000	0.166879
Sulfide:quinone oxidoreductase, mitochondrial	SQRDL		51535000	212850000	69825000	86178000	865460000	887390000	995240000	0.245939	0.0786858	0.0865902	0.242119	0.908715	0.319941	165690000	189680000	74146000	112780000	876600000	1078500000	1138700000	0.216381	0.0687492	0.0990428	0.873524	0.694136	0.317722	197410000	64248000	10785000	111830000	234260000	547210000	689590000	0.274259	0.0197091	0.162169	3.07262	0.121534	0.0718629	71685000	102350000	115960000	116160000	747130000	737750000	625580000	0.136991
Heterogeneous nuclear ribonucleoprotein K	HNRNPK		100360000	130800000	19357000	101010000	865460000	887390000	995240000	0.151134	0.0218134	0.101493	0.767278	0.214925	0.144332	195920000	113360000	52104000	97740000	876600000	1078500000	1138700000	0.129318	0.0483115	0.0858347	1.7283	0.562844	0.373588	133580000	115560000	44207000	104330000	234260000	547210000	689590000	0.493298	0.0807862	0.151293	1.15594	0.533972	0.163767	130430000	106900000	115030000	87279000	747130000	737750000	625580000	0.143081
Methylosome subunit pICln	CLNS1A		195470000	245830000	246040000	233510000	865460000	887390000	995240000	0.284045	0.277263	0.234627	0.795143	1.18172	0.97612	296070000	241550000	248330000	223700000	876600000	1078500000	1138700000	0.275553	0.230255	0.196452	1.22571	1.17207	0.83561	327760000	175300000	72837000	181080000	234260000	547210000	689590000	0.748314	0.133106	0.262591	1.86971	0.506896	0.177875	148350000	96032000	151420000	124240000	747130000	737750000	625580000	0.128535
Ras GTPase-activating-like protein IQGAP1	IQGAP1		0	15558000	0	27560000	865460000	887390000	995240000	0.0179766	0	0.0276918	0	0	0	77574000	18168000	16545000	12063000	876600000	1078500000	1138700000	0.0207255	0.0153408	0.0105937	4.26982	1.44811	0.740186	52683000	20503000	66728000	23990000	234260000	547210000	689590000	0.0875224	0.121942	0.0347888	2.56953	3.50522	1.39327	40606000	130500000	104940000	94185000	747130000	737750000	625580000	0.174668
Neuroblast differentiation-associated protein AHNAK	AHNAK		127120000	258950000	34168000	33946000	865460000	887390000	995240000	0.299205	0.0385039	0.0341084	0.490906	1.12887	0.128687	581770000	240600000	243670000	96767000	876600000	1078500000	1138700000	0.27447	0.225934	0.0849802	2.418	2.65867	0.823167	318480000	85697000	135480000	57880000	234260000	547210000	689590000	0.36582	0.247583	0.0839339	3.71635	2.94974	0.67679	286780000	147920000	282390000	210520000	747130000	737750000	625580000	0.197984
Heterogeneous nuclear ribonucleoprotein M	HNRNPM		18191000	15309000	0	0	865460000	887390000	995240000	0.0176889	0	0	1.18826	0	0	16115000	14625000	0	0	876600000	1078500000	1138700000	0.0166838	0	0	1.10188	0	0	15078000	0	0	0	234260000	547210000	689590000	0	0	0	∞	0	0	85313000	84036000	86662000	83771000	747130000	737750000	625580000	0.112478
60S ribosomal protein L3	RPL3		15638000	11867000	76258000	7190800	865460000	887390000	995240000	0.0137118	0.0859352	0.00722519	1.31777	11.8938	6.26725	145010000	18011000	92041000	51200000	876600000	1078500000	1138700000	0.0205464	0.0853417	0.0449636	8.05119	1.89802	4.1536	67129000	0	0	9405500	234260000	547210000	689590000	0	0	0.0136393	∞	0	0	76358000	89430000	101840000	94683000	747130000	737750000	625580000	0.119698
Fatty acyl-CoA reductase 1	FAR1		29550000	128950000	139040000	196590000	865460000	887390000	995240000	0.148996	0.156684	0.19753	0.229159	0.793216	1.0516	59028000	165710000	197590000	206900000	876600000	1078500000	1138700000	0.189037	0.183208	0.181698	0.356213	1.00831	0.969165	28906000	31419000	7475000	80068000	234260000	547210000	689590000	0.13412	0.0136602	0.11611	0.920017	0.117649	0.10185	68472000	130810000	140800000	135080000	747130000	737750000	625580000	0.175083
Putative elongation factor 1-alpha-like 3;Elongation factor 1-alpha 1;Elongation factor 1-alpha 2	EEF1A1P5;EEF1A1;EEF1A2		375670000	530630000	287510000	267860000	865460000	887390000	995240000	0.613119	0.323995	0.269141	0.70797	1.20381	0.528437	1413200000	1560600000	2055700000	353270000	876600000	1078500000	1138700000	1.78029	1.90607	0.31024	0.905549	6.14387	1.07065	581220000	93038000	1151200000	135360000	234260000	547210000	689590000	0.397157	2.10376	0.196291	6.24712	10.7176	5.29706	271760000	154620000	241310000	267930000	747130000	737750000	625580000	0.206952
Small nuclear ribonucleoprotein Sm D1	SNRPD1		394780000	178020000	38046000	18830000	865460000	887390000	995240000	0.205694	0.042874	0.0189201	2.21762	2.26606	0.208436	586890000	92021000	81480000	78186000	876600000	1078500000	1138700000	0.104975	0.0755494	0.0686625	6.37778	1.1003	0.71969	512800000	0	0	20795000	234260000	547210000	689590000	0	0	0.0301556	∞	0	0	241100000	100670000	92555000	120270000	747130000	737750000	625580000	0.134742
60S ribosomal protein L10a	RPL10A		39184000	70560000	11172000	81820000	865460000	887390000	995240000	0.0815289	0.0125897	0.0822113	0.555329	0.153139	0.15442	74253000	72164000	63259000	60967000	876600000	1078500000	1138700000	0.0823226	0.0586546	0.0535409	1.02895	1.09551	0.712497	102670000	37275000	16069000	60828000	234260000	547210000	689590000	0.159118	0.0293653	0.0882089	2.75439	0.332906	0.184551	78435000	104720000	104420000	100860000	747130000	737750000	625580000	0.140163
Serine/threonine-protein kinase 38-like	STK38L		7345600	129340000	61583000	114510000	865460000	887390000	995240000	0.149447	0.0693979	0.115058	0.0567929	0.603157	0.464366	66533000	52923000	92104000	92150000	876600000	1078500000	1138700000	0.060373	0.0854001	0.0809256	1.25717	1.05529	1.41454	19292000	131420000	39650000	130010000	234260000	547210000	689590000	0.561001	0.0724585	0.188532	0.146797	0.384329	0.129159	64937000	138130000	128050000	117590000	747130000	737750000	625580000	0.184881
Unconventional myosin-Va	MYO5A		2941700	684110000	79849000	230150000	865460000	887390000	995240000	0.790458	0.0899819	0.231251	0.00430004	0.389109	0.113835	341780000	425200000	252580000	286100000	876600000	1078500000	1138700000	0.485056	0.234196	0.251251	0.80381	0.932117	0.482822	157980000	167460000	100350000	171470000	234260000	547210000	689590000	0.714847	0.183385	0.248655	0.943389	0.737507	0.256537	310260000	160970000	158180000	176400000	747130000	737750000	625580000	0.215451
Peroxiredoxin-1	PRDX1		404680000	497220000	423150000	449080000	865460000	887390000	995240000	0.574515	0.476848	0.451228	0.813885	1.05678	0.83	1239400000	753670000	799730000	770940000	876600000	1078500000	1138700000	0.859765	0.741521	0.677035	1.64449	1.09525	0.862469	487660000	112280000	42337000	346290000	234260000	547210000	689590000	0.479297	0.0773688	0.502168	4.34325	0.15407	0.161422	123980000	161210000	189280000	186140000	747130000	737750000	625580000	0.215772
40S ribosomal protein S8	RPS8		22893000	32564000	15324000	30055000	865460000	887390000	995240000	0.0376262	0.0172686	0.0301987	0.703016	0.571832	0.458952	234000000	11229000	75481000	51692000	876600000	1078500000	1138700000	0.0128097	0.069987	0.0453956	20.8389	1.54171	5.46359	10848000	0	5984100	11965000	234260000	547210000	689590000	0	0.0109357	0.0173509	∞	0.630265	∞	150000000	168010000	188470000	147730000	747130000	737750000	625580000	0.224874
60S acidic ribosomal protein P1	RPLP1		64845000	43091000	0	15353000	865460000	887390000	995240000	0.0497897	0	0.0154264	1.50484	0	0	135810000	49804000	23719000	14012000	876600000	1078500000	1138700000	0.056815	0.0219926	0.0123053	2.72689	1.78725	0.387091	68863000	27840000	11640000	18851000	234260000	547210000	689590000	0.118842	0.0212715	0.0273365	2.47353	0.778136	0.17899	148220000	83124000	128730000	61802000	747130000	737750000	625580000	0.111258
Actin-related protein 2/3 complex subunit 1B	ARPC1B		30515000	752930000	370290000	302210000	865460000	887390000	995240000	0.869977	0.41728	0.303655	0.0405283	1.37419	0.479645	216950000	395230000	360510000	172190000	876600000	1078500000	1138700000	0.450867	0.33427	0.151216	0.548921	2.21054	0.741393	918930000	183830000	147210000	235680000	234260000	547210000	689590000	0.784726	0.269019	0.341768	4.9988	0.787139	0.342819	160230000	158950000	143020000	174180000	747130000	737750000	625580000	0.212747
Mitogen-activated protein kinase 12	MAPK12		14238000	502010000	201290000	270340000	865460000	887390000	995240000	0.58005	0.226834	0.271633	0.028362	0.835074	0.391059	140460000	551910000	225060000	262580000	876600000	1078500000	1138700000	0.629603	0.208679	0.230596	0.254498	0.904953	0.331445	5948200	252540000	75389000	287810000	234260000	547210000	689590000	1.07803	0.13777	0.417364	0.0235535	0.330095	0.127797	6159500	146410000	133540000	113830000	747130000	737750000	625580000	0.195963
60S ribosomal protein L7a	RPL7A		105660000	145260000	112890000	51689000	865460000	887390000	995240000	0.167841	0.127216	0.0519362	0.727385	2.44946	0.757952	406960000	77322000	112020000	61095000	876600000	1078500000	1138700000	0.0882067	0.103866	0.0536533	5.26319	1.93588	1.17753	73085000	0	0	87323000	234260000	547210000	689590000	0	0	0.12663	∞	0	0	182300000	175990000	187180000	181000000	747130000	737750000	625580000	0.235555
Leucine-rich repeat flightless-interacting protein 2	LRRFIP2		1036000000	557680000	1015500000	751740000	865460000	887390000	995240000	0.644374	1.14437	0.755335	1.8577	1.51505	1.77594	1674200000	478500000	1100400000	866730000	876600000	1078500000	1138700000	0.545859	1.02031	0.761157	3.49885	1.34047	1.86917	389930000	192770000	301310000	238010000	234260000	547210000	689590000	0.822889	0.55063	0.345147	2.02277	1.59535	0.669142	39029000	192930000	180150000	163620000	747130000	737750000	625580000	0.258228
Calcium/calmodulin-dependent protein kinase type II subunit delta	CAMK2D		192190000	7026300	0	0	865460000	887390000	995240000	0.00811857	0	0	27.3529	0	0	300520000	0	0	0	876600000	1078500000	1138700000	0	0	0	∞	0	0	95477000	0	0	0	234260000	547210000	689590000	0	0	0	∞	0	0	59395000	201800000	124670000	103170000	747130000	737750000	625580000	0.2701
rRNA 2-O-methyltransferase fibrillarin	FBL		40887000	879820000	444660000	369580000	865460000	887390000	995240000	1.01659	0.501087	0.371348	0.046472	1.34938	0.492909	127580000	606810000	403760000	251200000	876600000	1078500000	1138700000	0.692231	0.374372	0.220602	0.210247	1.69704	0.540819	0	183390000	100170000	276960000	234260000	547210000	689590000	0.782848	0.183056	0.40163	0	0.455782	0.233833	42920000	176830000	151710000	183670000	747130000	737750000	625580000	0.236679
60S acidic ribosomal protein P0;60S acidic ribosomal protein P0-like	RPLP0;RPLP0P6		169790000	228140000	21205000	105000000	865460000	887390000	995240000	0.263605	0.0238959	0.105502	0.744236	0.226497	0.0906503	487600000	152720000	110500000	107350000	876600000	1078500000	1138700000	0.174219	0.102457	0.0942742	3.19277	1.0868	0.588095	250020000	50943000	3112900	67574000	234260000	547210000	689590000	0.217464	0.00568868	0.0979916	4.90784	0.0580527	0.0261592	224430000	245610000	192370000	184040000	747130000	737750000	625580000	0.328738
Myosin regulatory light chain 12A	MYL12A		27686000	0	35915000	29404000	865460000	887390000	995240000	0	0.0404726	0.0295446	∞	1.36988	∞	0	0	35877000	46371000	876600000	1078500000	1138700000	0	0.0332656	0.0407228	0	0.816881	∞	0	0	0	10108000	234260000	547210000	689590000	0	0	0.014658	0	0	0	304360000	149840000	100770000	165480000	747130000	737750000	625580000	0.200554
Leucine-rich repeat flightless-interacting protein 1	LRRFIP1		195730000	745640000	407930000	380370000	865460000	887390000	995240000	0.861553	0.459696	0.382189	0.262499	1.2028	0.533567	734530000	312080000	459870000	415780000	876600000	1078500000	1138700000	0.356012	0.426398	0.365136	2.35366	1.16778	1.19771	798310000	341680000	42020000	268610000	234260000	547210000	689590000	1.45855	0.0767895	0.389521	2.33643	0.197138	0.0526478	49007000	190420000	204890000	166120000	747130000	737750000	625580000	0.254869
78 kDa glucose-regulated protein	HSPA5		117270000	252090000	138840000	175020000	865460000	887390000	995240000	0.291279	0.156459	0.175857	0.465191	0.889693	0.537145	261130000	222420000	280440000	279500000	876600000	1078500000	1138700000	0.25373	0.260028	0.245455	1.17404	1.05937	1.02482	151910000	168690000	86156000	145870000	234260000	547210000	689590000	0.720097	0.157446	0.211531	0.900528	0.744314	0.218645	407400000	245340000	335090000	323360000	747130000	737750000	625580000	0.328377
Annexin A2;Putative annexin A2-like protein	ANXA2;ANXA2P2		414130000	1699500000	664100000	349290000	865460000	887390000	995240000	1.9637	0.748374	0.350961	0.243678	2.13236	0.381105	1583700000	1363700000	1495400000	811750000	876600000	1078500000	1138700000	1.55567	1.38656	0.712874	1.16133	1.94502	0.891292	1594400000	813570000	381310000	441390000	234260000	547210000	689590000	3.47294	0.696826	0.640076	1.95976	1.08866	0.200645	456880000	317140000	573940000	446540000	747130000	737750000	625580000	0.424478
Dedicator of cytokinesis protein 7	DOCK7		69158000	206450000	89153000	90908000	865460000	887390000	995240000	0.238544	0.100467	0.0913428	0.334987	1.09988	0.421166	311640000	236990000	114380000	65107000	876600000	1078500000	1138700000	0.270351	0.106055	0.0571766	1.31499	1.85486	0.392285	91163000	75502000	20536000	20439000	234260000	547210000	689590000	0.3223	0.0375286	0.0296394	1.20742	1.26617	0.11644	68850000	301770000	223990000	205000000	747130000	737750000	625580000	0.403906
Serine/threonine-protein kinase 38	STK38		489930000	959910000	695710000	547800000	865460000	887390000	995240000	1.10913	0.783996	0.55042	0.510392	1.42436	0.706855	791550000	704720000	689960000	729050000	876600000	1078500000	1138700000	0.803924	0.63974	0.640248	1.12321	0.999208	0.795772	774570000	669320000	392920000	695600000	234260000	547210000	689590000	2.85717	0.718042	1.00872	1.15725	0.711839	0.251313	100720000	271470000	281720000	266680000	747130000	737750000	625580000	0.36335
Myosin-10	MYH10		77601000	533220000	646650000	458120000	865460000	887390000	995240000	0.616112	0.72871	0.460311	0.145533	1.58308	1.18276	178850000	1044900000	592110000	476250000	876600000	1078500000	1138700000	1.19199	0.549013	0.41824	0.171165	1.31267	0.460584	255830000	602710000	288830000	765810000	234260000	547210000	689590000	2.57283	0.527823	1.11053	0.424466	0.475289	0.205153	548970000	198730000	211790000	211820000	747130000	737750000	625580000	0.265991
Actin-related protein 2/3 complex subunit 3	ARPC3		73407000	562630000	325490000	303540000	865460000	887390000	995240000	0.650094	0.366795	0.304992	0.130471	1.20264	0.564218	192720000	351690000	266060000	275510000	876600000	1078500000	1138700000	0.401198	0.246694	0.241951	0.547983	1.0196	0.614895	411610000	95718000	182260000	139780000	234260000	547210000	689590000	0.408597	0.333071	0.2027	4.30024	1.64317	0.815158	325640000	321080000	176770000	289540000	747130000	737750000	625580000	0.429751
Calmodulin	CALM1		102200000	515310000	430530000	631280000	865460000	887390000	995240000	0.595417	0.485164	0.634299	0.198327	0.764882	0.814831	171480000	595280000	813230000	652090000	876600000	1078500000	1138700000	0.679078	0.754038	0.572662	0.288066	1.31672	1.11038	187820000	672250000	192720000	424780000	234260000	547210000	689590000	2.86967	0.352187	0.615989	0.27939	0.571741	0.122727	582470000	344150000	245700000	409700000	747130000	737750000	625580000	0.460629
Heterogeneous nuclear ribonucleoprotein H;Heterogeneous nuclear ribonucleoprotein H, N-terminally processed	HNRNPH1		114860000	433330000	219360000	147120000	865460000	887390000	995240000	0.500693	0.247197	0.147824	0.265064	1.67224	0.493709	273720000	406360000	323700000	193360000	876600000	1078500000	1138700000	0.463564	0.300139	0.169808	0.67359	1.76752	0.64746	249230000	440720000	161520000	160600000	234260000	547210000	689590000	1.88133	0.29517	0.232892	0.565506	1.26741	0.156894	139630000	344760000	295850000	260420000	747130000	737750000	625580000	0.461446
Ubiquitin-60S ribosomal protein L40;Ubiquitin;60S ribosomal protein L40;Ubiquitin-40S ribosomal protein S27a;Ubiquitin;40S ribosomal protein S27a;Polyubiquitin-B;Ubiquitin;Polyubiquitin-C;Ubiquitin	UBA52;RPS27A;UBB;UBC		186570000	1266500000	548650000	434610000	865460000	887390000	995240000	1.46338	0.618274	0.436689	0.147311	1.41582	0.422496	376010000	670990000	465660000	348270000	876600000	1078500000	1138700000	0.765446	0.431766	0.305849	0.560381	1.4117	0.564072	229030000	453180000	291040000	335350000	234260000	547210000	689590000	1.93452	0.531862	0.486303	0.505384	1.09368	0.274932	206160000	420720000	355650000	377200000	747130000	737750000	625580000	0.563115
Heat shock cognate 71 kDa protein	HSPA8		496360000	1041300000	435460000	493420000	865460000	887390000	995240000	1.20318	0.49072	0.49578	0.476673	0.989794	0.407854	1308800000	1061700000	798210000	662170000	876600000	1078500000	1138700000	1.21116	0.740111	0.581514	1.23274	1.27273	0.611078	885840000	512440000	237240000	406620000	234260000	547210000	689590000	2.18748	0.433545	0.589655	1.72867	0.735252	0.198193	674760000	440550000	647540000	464200000	747130000	737750000	625580000	0.589656
Calcium/calmodulin-dependent protein kinase type II subunit gamma	CAMK2G		423500000	23214000	0	7785700	865460000	887390000	995240000	0.0268227	0	0.00782294	18.2433	0	0	575240000	0	0	0	876600000	1078500000	1138700000	0	0	0	∞	0	0	143190000	0	0	5569200	234260000	547210000	689590000	0	0	0.0080761	∞	0	0	106760000	673070000	344160000	369530000	747130000	737750000	625580000	0.900874
Actin-related protein 2	ACTR2		24108000	503000000	311520000	384290000	865460000	887390000	995240000	0.581194	0.351052	0.386128	0.0479284	0.90916	0.604019	210360000	444530000	395850000	599330000	876600000	1078500000	1138700000	0.507107	0.367038	0.526328	0.473219	0.697355	0.723787	422850000	430640000	58228000	403540000	234260000	547210000	689590000	1.8383	0.106409	0.585188	0.981911	0.181837	0.0578844	732480000	553320000	664810000	683040000	747130000	737750000	625580000	0.740594
Actin-related protein 2/3 complex subunit 2	ARPC2		244940000	1376000000	630630000	776990000	865460000	887390000	995240000	1.58991	0.710657	0.780706	0.178009	0.910275	0.446981	431710000	835260000	754950000	889100000	876600000	1078500000	1138700000	0.952841	0.7	0.780803	0.516857	0.896513	0.734645	1108500000	614090000	126080000	661030000	234260000	547210000	689590000	2.6214	0.230405	0.958584	1.80511	0.24036	0.0878938	803790000	611630000	822420000	642500000	747130000	737750000	625580000	0.818639
Actin-related protein 3	ACTR3		261830000	2280100000	640560000	704930000	865460000	887390000	995240000	2.63455	0.721847	0.708302	0.114833	1.01912	0.273992	660270000	1008500000	630540000	779470000	876600000	1078500000	1138700000	1.15047	0.584645	0.684526	0.654705	0.854088	0.508181	1302200000	1550500000	276120000	711840000	234260000	547210000	689590000	6.61871	0.504596	1.03227	0.839858	0.488824	0.0762378	959150000	896960000	990810000	1101600000	747130000	737750000	625580000	1.20054
Gelsolin	GSN		386740000	3651600000	2301100000	1605800000	865460000	887390000	995240000	4.21926	2.59311	1.61348	0.10591	1.60715	0.614589	852820000	2764600000	1395700000	1909400000	876600000	1078500000	1138700000	3.15378	1.29411	1.67682	0.308479	0.771764	0.410337	880250000	800150000	242630000	933140000	234260000	547210000	689590000	3.41565	0.443395	1.35318	1.10011	0.327668	0.129813	947450000	668170000	592540000	848450000	747130000	737750000	625580000	0.894316
Tubulin alpha-1B chain;Tubulin alpha-4A chain	TUBA1B;TUBA4A		902110000	2087000000	751240000	1075600000	865460000	887390000	995240000	2.41143	0.846573	1.08074	0.432252	0.783324	0.351066	2073900000	1462700000	1351700000	1448900000	876600000	1078500000	1138700000	1.66861	1.25331	1.27242	1.41786	0.984988	0.751115	1968300000	1481700000	371120000	1061200000	234260000	547210000	689590000	6.32502	0.678204	1.53889	1.32841	0.440711	0.107226	976000000	1123200000	1217500000	1294800000	747130000	737750000	625580000	1.50335
Tubulin beta-4B chain;Tubulin beta-4A chain	TUBB4B;TUBB4A		895780000	1608700000	623060000	916390000	865460000	887390000	995240000	1.85878	0.702126	0.920773	0.556835	0.76254	0.377735	1833200000	1784800000	1059000000	983360000	876600000	1078500000	1138700000	2.03605	0.981919	0.863581	1.02712	1.13703	0.482267	1117500000	693230000	262300000	456880000	234260000	547210000	689590000	2.95923	0.479341	0.662539	1.61202	0.723491	0.161981	1014100000	1128900000	1273000000	1167700000	747130000	737750000	625580000	1.51098
Unconventional myosin-Ic	MYO1C		1041300000	7224200000	3100700000	4481400000	865460000	887390000	995240000	8.34724	3.49418	4.50283	0.144141	0.775996	0.418603	2291500000	4610100000	3253700000	4348100000	876600000	1078500000	1138700000	5.25907	3.01688	3.81848	0.497061	0.790073	0.573652	3536100000	5115100000	1541100000	3382900000	234260000	547210000	689590000	21.8351	2.81629	4.90567	0.691306	0.574088	0.12898	2826100000	1384700000	1681100000	1481100000	747130000	737750000	625580000	1.85336
Protein flightless-1 homolog	FLII		2616100000	4556600000	1742600000	2002800000	865460000	887390000	995240000	5.26495	1.96374	2.01238	0.574134	0.975828	0.372983	7254400000	4073800000	2160600000	2259400000	876600000	1078500000	1138700000	4.64727	2.00334	1.98419	1.78075	1.00965	0.431078	3777700000	2432400000	922920000	1466100000	234260000	547210000	689590000	10.3833	1.68659	2.12605	1.55308	0.7933	0.162433	600900000	1431500000	1262100000	1094300000	747130000	737750000	625580000	1.916
Unconventional myosin-Ib	MYO1B		469460000	1529800000	1554500000	1496100000	865460000	887390000	995240000	1.76761	1.75177	1.50326	0.306877	1.16532	0.991034	808360000	3005900000	1794800000	1757200000	876600000	1078500000	1138700000	3.42904	1.66416	1.54316	0.268924	1.07841	0.485314	1017200000	1783500000	652130000	1332400000	234260000	547210000	689590000	7.61334	1.19174	1.93216	0.570339	0.616789	0.156533	2651800000	1779700000	1587100000	1806400000	747130000	737750000	625580000	2.38205
Myosin regulatory light chain 12B	MYL12B		930080000	3278600000	1995900000	1818100000	865460000	887390000	995240000	3.78827	2.24918	1.8268	0.283682	1.23122	0.593722	2434000000	3623100000	3429000000	2497200000	876600000	1078500000	1138700000	4.13313	3.17942	2.19303	0.6718	1.44978	0.769252	2326600000	2035000000	1730700000	2598800000	234260000	547210000	689590000	8.68693	3.16277	3.76862	1.14329	0.839239	0.364084	6071200000	1821000000	1960400000	1840600000	747130000	737750000	625580000	2.43733
Actin, alpha cardiac muscle 1;Actin, gamma-enteric smooth muscle;Actin, alpha skeletal muscle;Actin, aortic smooth muscle	ACTC1;ACTG2;ACTA1;ACTA2		1210000000	9514000000	9444500000	8743200000	865460000	887390000	995240000	10.993	10.643	8.78502	0.127181	1.2115	0.968163	3438900000	8245200000	7878000000	11571000000	876600000	1078500000	1138700000	9.40589	7.30459	10.1616	0.417079	0.718843	0.776598	4345900000	14222000000	7967800000	8629900000	234260000	547210000	689590000	60.7103	14.5608	12.5145	0.305576	1.16351	0.23984	2253500000	1680700000	1731400000	1494900000	747130000	737750000	625580000	2.24954
Myosin light polypeptide 6	MYL6		570440000	5778600000	4172000000	2482500000	865460000	887390000	995240000	6.67691	4.70143	2.49437	0.098716	1.88481	0.704132	2679900000	4636300000	3339400000	2283700000	876600000	1078500000	1138700000	5.28896	3.09634	2.00553	0.578026	1.5439	0.585434	2255300000	5000900000	2439200000	3208600000	234260000	547210000	689590000	21.3476	4.45752	4.65291	0.450979	0.958007	0.208806	7762000000	1949000000	2601200000	2118400000	747130000	737750000	625580000	2.60865
Protein arginine N-methyltransferase 5;Protein arginine N-methyltransferase 5, N-terminally processed	PRMT5		20727000000	40382000000	21304000000	16321000000	865460000	887390000	995240000	46.6596	24.0075	16.3991	0.513273	1.46395	0.514524	28025000000	31341000000	19814000000	16598000000	876600000	1078500000	1138700000	35.7529	18.3718	14.5763	0.894196	1.26039	0.513855	24911000000	20854000000	6232800000	11453000000	234260000	547210000	689590000	89.0207	11.3901	16.6084	1.19454	0.685805	0.127949	8024800000	13160000000	11098000000	11821000000	747130000	737750000	625580000	17.6141
Myosin-9	MYH9		8101700000	47177000000	18211000000	26087000000	865460000	887390000	995240000	54.5109	20.522	26.2118	0.17173	0.78293	0.376475	19910000000	39522000000	25569000000	25516000000	876600000	1078500000	1138700000	45.0856	23.7079	22.408	0.50377	1.05801	0.525843	23209000000	41496000000	17606000000	32003000000	234260000	547210000	689590000	177.137	32.1741	46.4087	0.559307	0.693277	0.181635	59220000000	13708000000	13790000000	12953000000	747130000	737750000	625580000	18.3475
Eukaryotic translation initiation factor 5B	EIF5B		13830000000	46843000000	31113000000	28178000000	865460000	887390000	995240000	54.125	35.0612	28.3128	0.295242	1.23835	0.647783	32101000000	45943000000	27451000000	28172000000	876600000	1078500000	1138700000	52.4104	25.4529	24.7405	0.698714	1.0288	0.485646	25494000000	32013000000	12139000000	25290000000	234260000	547210000	689590000	136.656	22.1834	36.674	0.796364	0.604882	0.162331	7293000000	11935000000	12396000000	13987000000	747130000	737750000	625580000	15.9745
Ig kappa chain V-II region TEW;Ig kappa chain V-II region Cum;Ig kappa chain V-II region GM607;Ig kappa chain V-II region RPMI 6410			34832000000	80915000000	41452000000	32680000000	865460000	887390000	995240000	93.4936	46.7123	32.8363	0.430476	1.42258	0.49963	61717000000	44246000000	50617000000	40742000000	876600000	1078500000	1138700000	50.4746	46.9328	35.7794	1.39486	1.31173	0.92983	41573000000	37365000000	5870900000	43589000000	234260000	547210000	689590000	159.502	10.7288	63.21	1.11262	0.169732	0.0672642	2330700000	18467000000	5220700000	4118100000	747130000	737750000	625580000	24.7173
Actin, cytoplasmic 2;Actin, cytoplasmic 2, N-terminally processed	ACTG1		41158000000	185770000000	165440000000	124430000000	865460000	887390000	995240000	214.649	186.434	125.025	0.221554	1.49118	0.868555	67069000000	131150000000	155340000000	90397000000	876600000	1078500000	1138700000	149.612	144.033	79.3861	0.511392	1.81434	0.962712	60182000000	113210000000	81856000000	114550000000	234260000	547210000	689590000	483.266	149.588	166.113	0.531596	0.900518	0.309535	29908000000	26295000000	29802000000	25880000000	747130000	737750000	625580000	35.1947
[truncated: 19 more columns]

## Sheet: S2C. Nuclear Substrate Hits
Table S8. 3 nuclear substrate hit proteins from MDA-MB-468 cells
Enriched proteins from Table S2B showing nuclear localization (see column E).
The number of trials where each proteins shows at least 2-fold higher enrichment in mutant compared to wild type, with also higher intensity in wild type compared to the no protein control or mutant compared to mutant + SAHA, is shown in column D.
The color coding of each row corresponds to the number of trials where that protein was enriched: 3 trials (yellow highlight), or 2 trials (grey higlight)
Protein names	Gene names	Protein ID	Number of trials enriched	Cellular localization
Plasminogen activator inhibitor 1 RNA-binding protein	SERBP1	Q8NC51	3	N/C
Metastasis-associated protein MTA3;Metastasis-associated protein MTA1	MTA3;MTA1	Q9BTC8;Q13330	2	N/C
Glutathione S-transferase P	GSTP1	P09211	2	N/C

## Sheet: S2D.All Associated Protein Hits
Table S1D. 89 associated protein hits from MDA-MB-468 cells
Raw values from MaxQuant label-free quantitation used in this table were taken from Table S2A: Trial 2- columns D-G; Trial 3- columns Q-T; Trial 4- columns AD-AG; Trial 5- columns AQ-AT; Trial 6- columns BD-BG
Raw data were first normalized (indicated by "WT norm", "MT norm", and MT+SA norm" for each trial) to the levels of HDAC1 in that trial (indicated by "HD1 WT", "HD1 Mutant", or "HD1 Mutant + SAHA")
Next, the normalized values were compared to yield fold enrichment ratios: No protein control divided by wild type; mutant divided by wild type; mutant divided by mutant+ SAHA (see orange highlighted columns for each trial)
In a case where the wild type or mutant+SAHA sample contained no intensity signal, an infinity (∞) sign is shown.
The number of trials where each protein shows a ratio of mutant to WT and a ratio of mutant to mutant + SAHA between 0.56 and 1.8, with also higher intensity in wild type compared to the no protein control, is shown in column BQ (blue highlight)
The 89 proteins hits are listed in order of number of trials showing the minimal enrichment described above.
The color coding of each protein name corresponds to the number of trials where that protein was enriched: 5 trials (blue highlight), 4 trials (green highlight), 3 trials (yellow highlight), or 2 trials (grey highlight)
Finally, potential protein hits were analyzed for their cellular localization (column C: N- Nucleus, C- Cytoplasm, M- Mitochondria, Mem- Membrane, ER- Endoplasmic reticulum, N/A- not available)
Protein names	Gene names	Localization	Trial 1- No protein	Trial 1- WT	Trial 1- MUT	Trial 1- MUT+SAHA	HD1 WT	HD1 Mutant	HD1 Mutant+SAHA	WT norm	MT norm	MT +SA norm	Trial 1- IgG/WT	Trial 1- MT/SAHA	Trial 1- MT/WT	Trial 2- No protein	Trial 2- WT	Trial 2- MUT	Trial 2- MUT+SAHA	HD1 WT	HD1 MUT	HD1 MUT+SAHA	WT norm	MT norm	MT + SA norm	Trial 2- IgG/WT	Trial 2- MT/SAHA	Trial 2- MT/WT	Trial 4- No protein	Trial 4- WT	Trial 4- MUT	Trial 4- MUT+SAHA	HD1 WT	HD1 Mutant	HD1 Mutant+SAHA	WT norm	MT norm	MT +SA norm	Trial 4- IgG/WT	Trial 4- MT/SAHA	Trial 4- MT/WT	Trial 5- No protein	Trial 5- WT	Trial 5- MUT	Trial 5- MUT+SAHA	HD1 WT	HD1 Mutant	HD1 Mutant+SAHA	WT norm
Metastasis-associated protein MTA2	MTA2	N	11788000	281220000	409970000	261000000	865460000	887390000	995240000	0.324937	0.461995	0.262248	0.0419174	1.76167	1.4218	58952000	494990000	475340000	280080000	876600000	1078500000	1138700000	0.56467	0.440742	0.245965	0.119097	1.79189	0.780529	25462000	61669000	98056000	164570000	234260000	547210000	689590000	0.26325	0.179193	0.238649	0.412882	0.750863	0.680693	19599000	229620000	247980000	222370000	747130000	737750000	625580000	0.307336
Fatty acyl-CoA reductase 1	FAR1	Peroxisome	29550000	128950000	139040000	196590000	865460000	887390000	995240000	0.148996	0.156684	0.19753	0.229159	0.793216	1.0516	59028000	165710000	197590000	206900000	876600000	1078500000	1138700000	0.189037	0.183208	0.181698	0.356213	1.00831	0.969165	28906000	31419000	7475000	80068000	234260000	547210000	689590000	0.13412	0.0136602	0.11611	0.920017	0.117649	0.10185	68472000	130810000	140800000	135080000	747130000	737750000	625580000	0.175083
ADP/ATP translocase 3;ADP/ATP translocase 3, N-terminally processed	SLC25A6	M	18316000	33072000	53660000	78341000	865460000	887390000	995240000	0.0382132	0.0604695	0.0787157	0.553822	0.768201	1.58242	0	26303000	43657000	49770000	876600000	1078500000	1138700000	0.0300057	0.0404794	0.0437077	0	0.926137	1.34906	0	28584000	15769000	28982000	234260000	547210000	689590000	0.122018	0.0288171	0.0420279	0	0.685666	0.23617	46354000	60718000	71433000	69974000	747130000	737750000	625580000	0.0812683
Girdin	CCDC88A	C	0	60269000	45240000	87180000	865460000	887390000	995240000	0.0696381	0.050981	0.087597	0	0.581995	0.732084	58821000	139490000	44346000	44915000	876600000	1078500000	1138700000	0.159126	0.0411182	0.0394441	0.421686	1.04244	0.2584	0	42716000	19869000	109720000	234260000	547210000	689590000	0.182344	0.0363096	0.159109	0	0.228206	0.199127	26720000	45849000	34846000	30533000	747130000	737750000	625580000	0.0613668
T-complex protein 1 subunit theta	CCT8	C	0	40696000	50303000	161980000	865460000	887390000	995240000	0.0470224	0.0566865	0.162755	0	0.348294	1.20552	14923000	45878000	92613000	64267000	876600000	1078500000	1138700000	0.0523363	0.085872	0.0564389	0.325276	1.5215	1.64077	43641000	0	37347000	53182000	234260000	547210000	689590000	0	0.0682498	0.0771212	∞	0.884969	∞	4216600	36113000	52364000	41933000	747130000	737750000	625580000	0.0483356
Eukaryotic translation initiation factor 2-alpha kinase 3	EIF2AK3	ER	0	20279000	0	12893000	865460000	887390000	995240000	0.0234315	0	0.0129547	0	0	0	0	14400000	11151000	11225000	876600000	1078500000	1138700000	0.0164271	0.0103394	0.00985773	0	1.04886	0.629409	0	0	0	0	234260000	547210000	689590000	0	0	0	0	0	0	7892400	23032000	19862000	26466000	747130000	737750000	625580000	0.0308273
Eukaryotic translation initiation factor 5B	EIF5B	C	13830000000	46843000000	31113000000	28178000000	865460000	887390000	995240000	54.125	35.0612	28.3128	0.295242	1.23835	0.647783	32101000000	45943000000	27451000000	28172000000	876600000	1078500000	1138700000	52.4104	25.4529	24.7405	0.698714	1.0288	0.485646	25494000000	32013000000	12139000000	25290000000	234260000	547210000	689590000	136.656	22.1834	36.674	0.796364	0.604882	0.162331	7293000000	11935000000	12396000000	13987000000	747130000	737750000	625580000	15.9745
Enhancer of rudimentary homolog	ERH	N/A	96646000	720830000	564240000	420920000	865460000	887390000	995240000	0.832887	0.635842	0.422933	0.134076	1.50341	0.76342	169700000	977420000	438380000	284090000	876600000	1078500000	1138700000	1.11501	0.406472	0.249486	0.17362	1.62924	0.364545	275540000	372840000	727830000	390220000	234260000	547210000	689590000	1.59156	1.33007	0.565872	0.73903	2.35048	0.835702	205370000	291170000	278320000	351690000	747130000	737750000	625580000	0.389718
Heterogeneous nuclear ribonucleoprotein H;Heterogeneous nuclear ribonucleoprotein H, N-terminally processed	HNRNPH1	N	114860000	433330000	219360000	147120000	865460000	887390000	995240000	0.500693	0.247197	0.147824	0.265064	1.67224	0.493709	273720000	406360000	323700000	193360000	876600000	1078500000	1138700000	0.463564	0.300139	0.169808	0.67359	1.76752	0.64746	249230000	440720000	161520000	160600000	234260000	547210000	689590000	1.88133	0.29517	0.232892	0.565506	1.26741	0.156894	139630000	344760000	295850000	260420000	747130000	737750000	625580000	0.461446
Heterogeneous nuclear ribonucleoprotein H2;Heterogeneous nuclear ribonucleoprotein H2, N-terminally processed	HNRNPH2	N	0	14068000	17076000	25673000	865460000	887390000	995240000	0.0162549	0.0192429	0.0257958	0	0.745972	1.18382	0	6127700	0	0	876600000	1078500000	1138700000	0.0069903	0	0	0	0	0	0	7705200	0	16331000	234260000	547210000	689590000	0.0328917	0	0.0236822	0	0	0	0	44068000	30273000	22571000	747130000	737750000	625580000	0.058983
Tyrosine-protein kinase JAK1	JAK1	Membrane	29699000	56374000	47323000	62045000	865460000	887390000	995240000	0.0651376	0.0533283	0.0623417	0.526821	0.855419	0.818702	96774000	120190000	23020000	39525000	876600000	1078500000	1138700000	0.137109	0.0213445	0.0347106	0.805175	0.614926	0.155675	21655000	36037000	43462000	37564000	234260000	547210000	689590000	0.153833	0.0794247	0.0544729	0.60091	1.45806	0.516304	24099000	118360000	113360000	123320000	747130000	737750000	625580000	0.15842
MOB kinase activator 2	MOB2	N	85185000	164710000	104120000	75751000	865460000	887390000	995240000	0.190315	0.117333	0.0761133	0.517182	1.54156	0.616519	161490000	88948000	80857000	80174000	876600000	1078500000	1138700000	0.101469	0.0749717	0.0704084	1.81556	1.06481	0.738861	0	111890000	32478000	134990000	234260000	547210000	689590000	0.477632	0.059352	0.195754	0	0.303197	0.124263	0	48209000	84096000	41160000	747130000	737750000	625580000	0.0645256
Unconventional myosin-VI	MYO6	N/C/Golgi	87495000	1995100000	543420000	940100000	865460000	887390000	995240000	2.30525	0.61238	0.944596	0.0438549	0.648298	0.265646	314220000	741990000	808790000	754320000	876600000	1078500000	1138700000	0.846441	0.749921	0.66244	0.423483	1.13206	0.88597	354890000	1589700000	381020000	660420000	234260000	547210000	689590000	6.78605	0.696296	0.9577	0.223243	0.72705	0.102607	594100000	999490000	931580000	1049200000	747130000	737750000	625580000	1.33777
Histone-binding protein RBBP7	RBBP7	N	117370000	329020000	274190000	252080000	865460000	887390000	995240000	0.380168	0.308985	0.253286	0.356726	1.21991	0.812759	149920000	415020000	205490000	209890000	876600000	1078500000	1138700000	0.473443	0.190533	0.184324	0.361236	1.03368	0.402442	22703000	194720000	220980000	247140000	234260000	547210000	689590000	0.831213	0.40383	0.358387	0.116593	1.1268	0.485832	33909000	194240000	264020000	173540000	747130000	737750000	625580000	0.259982
Paired amphipathic helix protein Sin3a	SIN3A	N	0	48203000	42519000	60299000	865460000	887390000	995240000	0.0556964	0.0479147	0.0605874	0	0.790836	0.860283	0	11491000	75954000	24369000	876600000	1078500000	1138700000	0.0131086	0.0704256	0.0214007	0	3.2908	5.37247	0	13228000	4125700	48495000	234260000	547210000	689590000	0.0564672	0.00753952	0.0703244	0	0.107211	0.13352	0	64268000	93240000	64988000	747130000	737750000	625580000	0.0860198
Serine/threonine-protein kinase 38	STK38	N/C	489930000	959910000	695710000	547800000	865460000	887390000	995240000	1.10913	0.783996	0.55042	0.510392	1.42436	0.706855	791550000	704720000	689960000	729050000	876600000	1078500000	1138700000	0.803924	0.63974	0.640248	1.12321	0.999208	0.795772	774570000	669320000	392920000	695600000	234260000	547210000	689590000	2.85717	0.718042	1.00872	1.15725	0.711839	0.251313	100720000	271470000	281720000	266680000	747130000	737750000	625580000	0.36335
Thyroid hormone receptor-associated protein 3	THRAP3	N	648530	392670000	309410000	190010000	865460000	887390000	995240000	0.453712	0.348674	0.190919	0.00165159	1.8263	0.768492	13673000	385220000	299210000	274590000	876600000	1078500000	1138700000	0.439448	0.277432	0.241143	0.035494	1.15048	0.631319	160870000	208120000	268730000	352820000	234260000	547210000	689590000	0.888415	0.491091	0.511637	0.772968	0.959842	0.552773	90968000	149620000	179650000	149370000	747130000	737750000	625580000	0.20026
Ubiquitin-60S ribosomal protein L40;Ubiquitin;60S ribosomal protein L40;Ubiquitin-40S ribosomal protein S27a;Ubiquitin;40S ribosomal protein S27a;Polyubiquitin-B;Ubiquitin;Polyubiquitin-C;Ubiquitin	UBA52;RPS27A;UBB;UBC	C	186570000	1266500000	548650000	434610000	865460000	887390000	995240000	1.46338	0.618274	0.436689	0.147311	1.41582	0.422496	376010000	670990000	465660000	348270000	876600000	1078500000	1138700000	0.765446	0.431766	0.305849	0.560381	1.4117	0.564072	229030000	453180000	291040000	335350000	234260000	547210000	689590000	1.93452	0.531862	0.486303	0.505384	1.09368	0.274932	206160000	420720000	355650000	377200000	747130000	737750000	625580000	0.563115
Ubiquitin carboxyl-terminal hydrolase 15	USP15	N/C	10498000	50295000	0	36969000	865460000	887390000	995240000	0.0581136	0	0.0371458	0.208729	0	0	30699000	9069000	14074000	30416000	876600000	1078500000	1138700000	0.0103457	0.0130496	0.0267112	3.38505	0.488545	1.26136	0	7773800	15348000	17945000	234260000	547210000	689590000	0.0331845	0.0280477	0.0260227	0	1.07782	0.845206	16118000	49268000	46653000	44573000	747130000	737750000	625580000	0.065943
Actin, alpha cardiac muscle 1;Actin, gamma-enteric smooth muscle;Actin, alpha skeletal muscle;Actin, aortic smooth muscle	ACTC1;ACTG2;ACTA1;ACTA2	C	1210000000	9514000000	9444500000	8743200000	865460000	887390000	995240000	10.993	10.643	8.78502	0.127181	1.2115	0.968163	3438900000	8245200000	7878000000	11571000000	876600000	1078500000	1138700000	9.40589	7.30459	10.1616	0.417079	0.718843	0.776598	4345900000	14222000000	7967800000	8629900000	234260000	547210000	689590000	60.7103	14.5608	12.5145	0.305576	1.16351	0.23984	2253500000	1680700000	1731400000	1494900000	747130000	737750000	625580000	2.24954
Actin-related protein 2	ACTR2	C	24108000	503000000	311520000	384290000	865460000	887390000	995240000	0.581194	0.351052	0.386128	0.0479284	0.90916	0.604019	210360000	444530000	395850000	599330000	876600000	1078500000	1138700000	0.507107	0.367038	0.526328	0.473219	0.697355	0.723787	422850000	430640000	58228000	403540000	234260000	547210000	689590000	1.8383	0.106409	0.585188	0.981911	0.181837	0.0578844	732480000	553320000	664810000	683040000	747130000	737750000	625580000	0.740594
Actin-related protein 2/3 complex subunit 3	ARPC3	N/C	73407000	562630000	325490000	303540000	865460000	887390000	995240000	0.650094	0.366795	0.304992	0.130471	1.20264	0.564218	192720000	351690000	266060000	275510000	876600000	1078500000	1138700000	0.401198	0.246694	0.241951	0.547983	1.0196	0.614895	411610000	95718000	182260000	139780000	234260000	547210000	689590000	0.408597	0.333071	0.2027	4.30024	1.64317	0.815158	325640000	321080000	176770000	289540000	747130000	737750000	625580000	0.429751
Actin-related protein 2/3 complex subunit 4	ARPC4	N/C	164240000	1650200000	385750000	608850000	865460000	887390000	995240000	1.90673	0.434702	0.611762	0.0995273	0.710573	0.227983	446570000	1195400000	749390000	765860000	876600000	1078500000	1138700000	1.36368	0.694845	0.672574	0.373574	1.03311	0.509537	1311300000	781420000	240220000	872460000	234260000	547210000	689590000	3.3357	0.438991	1.26519	1.6781	0.346977	0.131604	525820000	574750000	739050000	950780000	747130000	737750000	625580000	0.769277
Actin-related protein 2/3 complex subunit 5-like protein	ARPC5L	C	0	120590000	33564000	83004000	865460000	887390000	995240000	0.139336	0.0378233	0.083401	0	0.453511	0.271453	47421000	125380000	109500000	103860000	876600000	1078500000	1138700000	0.14303	0.10153	0.0912093	0.378218	1.11315	0.709851	75975000	20010000	29419000	24741000	234260000	547210000	689590000	0.0854179	0.0537618	0.0358778	3.79685	1.49847	0.629397	60859000	99996000	124740000	153890000	747130000	737750000	625580000	0.13384
Calmodulin	CALM1	Spindle	102200000	515310000	430530000	631280000	865460000	887390000	995240000	0.595417	0.485164	0.634299	0.198327	0.764882	0.814831	171480000	595280000	813230000	652090000	876600000	1078500000	1138700000	0.679078	0.754038	0.572662	0.288066	1.31672	1.11038	187820000	672250000	192720000	424780000	234260000	547210000	689590000	2.86967	0.352187	0.615989	0.27939	0.571741	0.122727	582470000	344150000	245700000	409700000	747130000	737750000	625580000	0.460629
Calcium/calmodulin-dependent protein kinase type II subunit delta	CAMK2D	C	192190000	7026300	0	0	865460000	887390000	995240000	0.00811857	0	0	27.3529	0	0	300520000	0	0	0	876600000	1078500000	1138700000	0	0	0	∞	0	0	95477000	0	0	0	234260000	547210000	689590000	0	0	0	∞	0	0	59395000	201800000	124670000	103170000	747130000	737750000	625580000	0.2701
T-complex protein 1 subunit gamma	CCT3	C	17563000	84854000	158620000	124280000	865460000	887390000	995240000	0.098045	0.178749	0.124874	0.206979	1.43143	1.82313	0	47179000	186060000	105450000	876600000	1078500000	1138700000	0.0538204	0.172517	0.0926056	0	1.86293	3.20542	23894000	67235000	95950000	48778000	234260000	547210000	689590000	0.28701	0.175344	0.0707348	0.35538	2.47889	0.610933	5813400	68052000	64158000	59304000	747130000	737750000	625580000	0.0910846
T-complex protein 1 subunit zeta-2	CCT6B	C	2120700	61463000	43228000	69098000	865460000	887390000	995240000	0.0710177	0.0487136	0.0694285	0.0345037	0.701638	0.685936	17257000	0	43514000	87891000	876600000	1078500000	1138700000	0	0.0403468	0.0771854	∞	0.522726	∞	20153000	48210000	29914000	66703000	234260000	547210000	689590000	0.205797	0.0546664	0.0967285	0.418025	0.565153	0.265633	5923000	15232000	29593000	37965000	747130000	737750000	625580000	0.0203873
T-complex protein 1 subunit eta	CCT7	C	3309300	43198000	43328000	102440000	865460000	887390000	995240000	0.0499133	0.0488263	0.10293	0.0766077	0.474365	0.978222	10206000	63148000	111210000	160000000	876600000	1078500000	1138700000	0.0720374	0.103115	0.140511	0.16162	0.73386	1.43141	0	0	19611000	57008000	234260000	547210000	689590000	0	0.0358382	0.0826694	0	0.433512	∞	3598700	45278000	56788000	43944000	747130000	737750000	625580000	0.0606026
Methylosome subunit pICln	CLNS1A	N/C	195470000	245830000	246040000	233510000	865460000	887390000	995240000	0.284045	0.277263	0.234627	0.795143	1.18172	0.97612	296070000	241550000	248330000	223700000	876600000	1078500000	1138700000	0.275553	0.230255	0.196452	1.22571	1.17207	0.83561	327760000	175300000	72837000	181080000	234260000	547210000	689590000	0.748314	0.133106	0.262591	1.86971	0.506896	0.177875	148350000	96032000	151420000	124240000	747130000	737750000	625580000	0.128535
Probable ATP-dependent RNA helicase DDX17;Probable ATP-dependent RNA helicase DDX5	DDX17;DDX5	N/C	0	14115000	0	7474800	865460000	887390000	995240000	0.0163092	0	0.00751055	0	0	0	14649000	21287000	25169000	9404100	876600000	1078500000	1138700000	0.0242836	0.023337	0.00825863	0.688166	2.82578	0.961021	46146000	0	0	30836000	234260000	547210000	689590000	0	0	0.0447164	∞	0	0	8708100	9919300	15035000	10425000	747130000	737750000	625580000	0.0132765
Dedicator of cytokinesis protein 7	DOCK7	axon	69158000	206450000	89153000	90908000	865460000	887390000	995240000	0.238544	0.100467	0.0913428	0.334987	1.09988	0.421166	311640000	236990000	114380000	65107000	876600000	1078500000	1138700000	0.270351	0.106055	0.0571766	1.31499	1.85486	0.392285	91163000	75502000	20536000	20439000	234260000	547210000	689590000	0.3223	0.0375286	0.0296394	1.20742	1.26617	0.11644	68850000	301770000	223990000	205000000	747130000	737750000	625580000	0.403906
Destrin	DSTN	N/A	231610000	166700000	54166000	67754000	865460000	887390000	995240000	0.192614	0.0610397	0.0680781	1.38938	0.896613	0.316901	391800000	192610000	48264000	88253000	876600000	1078500000	1138700000	0.219724	0.044751	0.0775033	2.03416	0.577408	0.203669	147220000	87513000	0	88915000	234260000	547210000	689590000	0.373572	0	0.128939	1.68226	0	0	1798000	243140000	148080000	122260000	747130000	737750000	625580000	0.325432
Eukaryotic translation initiation factor 4B	EIF4B	N	105250000	166100000	169530000	20645000	865460000	887390000	995240000	0.191921	0.191043	0.0207437	0.633654	9.20969	0.995427	120580000	106940000	37872000	12690000	876600000	1078500000	1138700000	0.121994	0.0351154	0.0111443	1.12755	3.15098	0.287845	185440000	49908000	33886000	77901000	234260000	547210000	689590000	0.213045	0.061925	0.112967	3.71564	0.548169	0.290666	59609000	85419000	128790000	62595000	747130000	737750000	625580000	0.11433
RNA polymerase II elongation factor ELL	ELL	N	0	21103000	0	0	865460000	887390000	995240000	0.0243836	0	0	0	0	0	24041000	13583000	16409000	0	876600000	1078500000	1138700000	0.0154951	0.0152146	0	1.76993	∞	0.981901	17886000	8633100	11035000	0	234260000	547210000	689590000	0.0368526	0.0201659	0	2.07179	∞	0.547205	5319800	15622000	12170000	16488000	747130000	737750000	625580000	0.0209093
Constitutive coactivator of PPAR-gamma-like protein 1;Putative uncharacterized protein C9orf129	FAM120A;C9orf129	C	0	0	13748000	0	865460000	887390000	995240000	0	0.0154926	0	0	∞	∞	0	6957000	7093400	5910200	876600000	1078500000	1138700000	0.00793634	0.0065771	0.0051903	0	1.26719	0.828731	0	10042000	18344000	0	234260000	547210000	689590000	0.0428669	0.0335228	0	0	∞	0.78202	1170600	3065400	1914500	2708000	747130000	737750000	625580000	0.0041029
rRNA 2-O-methyltransferase fibrillarin	FBL	Membrane	40887000	879820000	444660000	369580000	865460000	887390000	995240000	1.01659	0.501087	0.371348	0.046472	1.34938	0.492909	127580000	606810000	403760000	251200000	876600000	1078500000	1138700000	0.692231	0.374372	0.220602	0.210247	1.69704	0.540819	0	183390000	100170000	276960000	234260000	547210000	689590000	0.782848	0.183056	0.40163	0	0.455782	0.233833	42920000	176830000	151710000	183670000	747130000	737750000	625580000	0.236679
Fibrinogen gamma chain	FGG	Secreted	0	128600000	12574000	15007000	865460000	887390000	995240000	0.148592	0.0141696	0.0150788	0	0.939708	0.0953597	60211000	146030000	21848000	9351500	876600000	1078500000	1138700000	0.166587	0.0202578	0.00821244	0.412319	2.46672	0.121605	32737000	24156000	66388000	19381000	234260000	547210000	689590000	0.103116	0.121321	0.0281051	1.35523	4.31668	1.17655	7828000	21496000	28723000	24122000	747130000	737750000	625580000	0.0287714
Protein flightless-1 homolog	FLII	N/C	2616100000	4556600000	1742600000	2002800000	865460000	887390000	995240000	5.26495	1.96374	2.01238	0.574134	0.975828	0.372983	7254400000	4073800000	2160600000	2259400000	876600000	1078500000	1138700000	4.64727	2.00334	1.98419	1.78075	1.00965	0.431078	3777700000	2432400000	922920000	1466100000	234260000	547210000	689590000	10.3833	1.68659	2.12605	1.55308	0.7933	0.162433	600900000	1431500000	1262100000	1094300000	747130000	737750000	625580000	1.916
Histone deacetylase 2	HDAC2	N	0	0	0	0	865460000	887390000	995240000	0	0	0	0	0	0	0	16959000	10047000	0	876600000	1078500000	1138700000	0.0193463	0.00931572	0	0	∞	0.481523	0	0	0	0	234260000	547210000	689590000	0	0	0	0	0	0	1507400	15633000	11122000	14090000	747130000	737750000	625580000	0.0209241
Histone H4	HIST1H4A	N	11337000	316180000	145560000	98284000	865460000	887390000	995240000	0.365332	0.164032	0.0987541	0.0358562	1.66101	0.448994	18165000	164620000	230900000	203920000	876600000	1078500000	1138700000	0.187794	0.214094	0.179081	0.110345	1.19551	1.14005	66112000	139670000	27367000	61986000	234260000	547210000	689590000	0.596218	0.0500119	0.0898882	0.473344	0.556379	0.0838819	88234000	147530000	120280000	147470000	747130000	737750000	625580000	0.197462
Heterogeneous nuclear ribonucleoprotein F;Heterogeneous nuclear ribonucleoprotein F, N-terminally processed	HNRNPF	N	0	6447600	7412500	6900600	865460000	887390000	995240000	0.00744991	0.00835315	0.0069336	0	1.20473	1.12124	0	0	0	0	876600000	1078500000	1138700000	0	0	0	0	0	0	0	0	0	0	234260000	547210000	689590000	0	0	0	0	0	0	0	2709000	3156400	1223600	747130000	737750000	625580000	0.00362588
Stress-70 protein, mitochondrial	HSPA9	N/M	44637000	127230000	0	45671000	865460000	887390000	995240000	0.147009	0	0.0458894	0.350837	0	0	157230000	120560000	77679000	55947000	876600000	1078500000	1138700000	0.137531	0.072025	0.0491323	1.30416	1.46594	0.523699	110510000	5648700	9458900	60267000	234260000	547210000	689590000	0.024113	0.0172857	0.0873954	19.5638	0.197787	0.716863	33739000	36146000	40854000	31140000	747130000	737750000	625580000	0.0483798
Ig kappa chain V-IV region Len;Ig kappa chain V-IV region;Ig kappa chain V-IV region JI;Ig kappa chain V-IV region B17	IGKV4-1	Secreted	51969000	210010000	120680000	112070000	865460000	887390000	995240000	0.242657	0.135994	0.112606	0.24746	1.2077	0.560438	729410000	281070000	111340000	128340000	876600000	1078500000	1138700000	0.320637	0.103236	0.112707	2.59512	0.915964	0.321972	181970000	107420000	33070000	234940000	234260000	547210000	689590000	0.45855	0.0604338	0.340695	1.694	0.177384	0.131793	77325000	175990000	287520000	240600000	747130000	737750000	625580000	0.235555
Importin-7	IPO7	N/C	0	21493000	0	23354000	865460000	887390000	995240000	0.0248342	0	0.0234657	0	0	0	5673100	15733000	18427000	31963000	876600000	1078500000	1138700000	0.0179478	0.0170858	0.0280697	0.360586	0.60869	0.951973	0	0	9453500	12118000	234260000	547210000	689590000	0	0.0172758	0.0175728	0	0.983102	∞	34646000	37333000	43538000	43863000	747130000	737750000	625580000	0.0499685
Importin-9	IPO9	N/C	0	75379000	65313000	102630000	865460000	887390000	995240000	0.087097	0.0736012	0.103121	0	0.713738	0.845049	85180000	128830000	130450000	127880000	876600000	1078500000	1138700000	0.146966	0.120955	0.112304	0.661181	1.07704	0.823016	88431000	62582000	24850000	0	234260000	547210000	689590000	0.267148	0.0454122	0	1.41304	∞	0.169989	82928000	59192000	56098000	60766000	747130000	737750000	625580000	0.0792258
Ras GTPase-activating-like protein IQGAP1	IQGAP1	N/C	0	15558000	0	27560000	865460000	887390000	995240000	0.0179766	0	0.0276918	0	0	0	77574000	18168000	16545000	12063000	876600000	1078500000	1138700000	0.0207255	0.0153408	0.0105937	4.26982	1.44811	0.740186	52683000	20503000	66728000	23990000	234260000	547210000	689590000	0.0875224	0.121942	0.0347888	2.56953	3.50522	1.39327	40606000	130500000	104940000	94185000	747130000	737750000	625580000	0.174668
Integrin alpha-3;Integrin alpha-3 heavy chain;Integrin alpha-3 light chain	ITGA3	Membrane	0	161140000	0	13010000	865460000	887390000	995240000	0.18619	0	0.0130722	0	0	0	13901000	208360000	16842000	21132000	876600000	1078500000	1138700000	0.237691	0.0156161	0.018558	0.0667163	0.841477	0.0656993	184010000	40488000	38752000	41840000	234260000	547210000	689590000	0.172834	0.0708174	0.0606737	4.5448	1.16718	0.409743	20903000	53943000	78273000	80409000	747130000	737750000	625580000	0.0722003
Lysine-specific histone demethylase 1A	KDM1A	N	0	9180500	0	44421000	865460000	887390000	995240000	0.0106077	0	0.0446335	0	0	0	0	5910100	15910000	53563000	876600000	1078500000	1138700000	0.00674207	0.014752	0.0470387	0	0.313613	2.18805	0	0	0	0	234260000	547210000	689590000	0	0	0	0	0	0	0	37734000	24469000	26298000	747130000	737750000	625580000	0.0505053
Importin subunit alpha-3	KPNA4	N/C	0	0	5850800	0	865460000	887390000	995240000	0	0.00659327	0	0	∞	∞	0	0	0	2274800	876600000	1078500000	1138700000	0	0	0.00199772	0	0	0	0	0	0	2792600	234260000	547210000	689590000	0	0	0.00404965	0	0	0	918010	8848800	10024000	7493100	747130000	737750000	625580000	0.0118437
Leucine-rich repeat and calponin homology domain-containing protein 3	LRCH3	C	0	33865000	4761900	31649000	865460000	887390000	995240000	0.0391295	0.00536619	0.0318004	0	0.168746	0.137139	9929500	7676300	0	13667000	876600000	1078500000	1138700000	0.0087569	0	0.0120023	1.29353	0	0	41622000	8719100	11302000	30798000	234260000	547210000	689590000	0.0372198	0.0206539	0.0446613	4.77366	0.462455	0.554917	6017700	32139000	29980000	22416000	747130000	737750000	625580000	0.0430166
Leucine-rich repeat flightless-interacting protein 1	LRRFIP1	N/C	195730000	745640000	407930000	380370000	865460000	887390000	995240000	0.861553	0.459696	0.382189	0.262499	1.2028	0.533567	734530000	312080000	459870000	415780000	876600000	1078500000	1138700000	0.356012	0.426398	0.365136	2.35366	1.16778	1.19771	798310000	341680000	42020000	268610000	234260000	547210000	689590000	1.45855	0.0767895	0.389521	2.33643	0.197138	0.0526478	49007000	190420000	204890000	166120000	747130000	737750000	625580000	0.254869
Leucine-rich repeat flightless-interacting protein 2	LRRFIP2	N/A	1036000000	557680000	1015500000	751740000	865460000	887390000	995240000	0.644374	1.14437	0.755335	1.8577	1.51505	1.77594	1674200000	478500000	1100400000	866730000	876600000	1078500000	1138700000	0.545859	1.02031	0.761157	3.49885	1.34047	1.86917	389930000	192770000	301310000	238010000	234260000	547210000	689590000	0.822889	0.55063	0.345147	2.02277	1.59535	0.669142	39029000	192930000	180150000	163620000	747130000	737750000	625580000	0.258228
Mitogen-activated protein kinase 12	MAPK12	N/C/M	14238000	502010000	201290000	270340000	865460000	887390000	995240000	0.58005	0.226834	0.271633	0.028362	0.835074	0.391059	140460000	551910000	225060000	262580000	876600000	1078500000	1138700000	0.629603	0.208679	0.230596	0.254498	0.904953	0.331445	5948200	252540000	75389000	287810000	234260000	547210000	689590000	1.07803	0.13777	0.417364	0.0235535	0.330095	0.127797	6159500	146410000	133540000	113830000	747130000	737750000	625580000	0.195963
Methyl-CpG-binding domain protein 2	MBD2	N	0	0	0	0	865460000	887390000	995240000	0	0	0	0	0	0	0	21307000	0	0	876600000	1078500000	1138700000	0.0243064	0	0	0	0	0	0	18990000	0	8170400	234260000	547210000	689590000	0.0810638	0	0.0118482	0	0	0	4548900	12106000	18347000	14961000	747130000	737750000	625580000	0.0162033
Melanoma inhibitory activity protein 3	MIA3	ER	0	0	0	0	865460000	887390000	995240000	0	0	0	0	0	0	0	0	65219000	36626000	876600000	1078500000	1138700000	0	0.060472	0.0321647	0	1.88007	∞	0	0	0	7548600	234260000	547210000	689590000	0	0	0.0109465	0	0	0	20124000	30969000	39051000	35053000	747130000	737750000	625580000	0.0414506
Myosin regulatory light chain 12B	MYL12B	C	930080000	3278600000	1995900000	1818100000	865460000	887390000	995240000	3.78827	2.24918	1.8268	0.283682	1.23122	0.593722	2434000000	3623100000	3429000000	2497200000	876600000	1078500000	1138700000	4.13313	3.17942	2.19303	0.6718	1.44978	0.769252	2326600000	2035000000	1730700000	2598800000	234260000	547210000	689590000	8.68693	3.16277	3.76862	1.14329	0.839239	0.364084	6071200000	1821000000	1960400000	1840600000	747130000	737750000	625580000	2.43733
Unconventional myosin-Id	MYO1D	C	0	440960000	102620000	168340000	865460000	887390000	995240000	0.509509	0.115643	0.169145	0	0.683688	0.226968	28242000	89216000	161570000	105140000	876600000	1078500000	1138700000	0.101775	0.14981	0.0923334	0.316558	1.62249	1.47197	16767000	160470000	14774000	111570000	234260000	547210000	689590000	0.685008	0.0269988	0.161792	0.104487	0.166874	0.0394138	18368000	65212000	114840000	94821000	747130000	737750000	625580000	0.0872833
Olfactory receptor 2B11	OR2B11	Membrane	0	38475000	0	0	865460000	887390000	995240000	0.0444561	0	0	0	0	0	0	0	0	0	876600000	1078500000	1138700000	0	0	0	0	0	0	0	0	0	0	234260000	547210000	689590000	0	0	0	0	0	0	6199200	15321000	21395000	20282000	747130000	737750000	625580000	0.0205065
OTU domain-containing protein 4	OTUD4	N/C	57010000	3330800	5563400	5033500	865460000	887390000	995240000	0.00384859	0.0062694	0.00505757	17.116	1.23961	1.62901	158070000	0	0	0	876600000	1078500000	1138700000	0	0	0	∞	0	0	11545000	6797200	0	0	234260000	547210000	689590000	0.0290156	0	0	1.69849	0	0	10146000	27242000	15916000	11428000	747130000	737750000	625580000	0.0364622
Protein phosphatase 1B	PPM1B	C	0	7355200	6212000	23873000	865460000	887390000	995240000	0.0084986	0.0070003	0.0239872	0	0.291835	0.823701	10524000	22368000	0	22669000	876600000	1078500000	1138700000	0.0255168	0	0.0199078	0.470494	0	0	24925000	11345000	0	27977000	234260000	547210000	689590000	0.0484291	0	0.0405705	2.197	0	0	42718000	117500000	139670000	91616000	747130000	737750000	625580000	0.157268
Serine/threonine-protein phosphatase 2A 55 kDa regulatory subunit B beta isoform;Serine/threonine-protein phosphatase 2A 55 kDa regulatory subunit B alpha isoform;Serine/threonine-protein phosphatase 2A 55 kDa regulatory subunit B delta isoform	PPP2R2B;PPP2R2A;PPP2R2D	C	0	0	0	0	865460000	887390000	995240000	0	0	0	0	0	0	4979700	0	0	0	876600000	1078500000	1138700000	0	0	0	∞	0	0	0	0	0	0	234260000	547210000	689590000	0	0	0	0	0	0	0	3446100	3278000	3812900	747130000	737750000	625580000	0.00461245
Peroxiredoxin-1	PRDX1	C	404680000	497220000	423150000	449080000	865460000	887390000	995240000	0.574515	0.476848	0.451228	0.813885	1.05678	0.83	1239400000	753670000	799730000	770940000	876600000	1078500000	1138700000	0.859765	0.741521	0.677035	1.64449	1.09525	0.862469	487660000	112280000	42337000	346290000	234260000	547210000	689590000	0.479297	0.0773688	0.502168	4.34325	0.15407	0.161422	123980000	161210000	189280000	186140000	747130000	737750000	625580000	0.215772
Protein arginine N-methyltransferase 5;Protein arginine N-methyltransferase 5, N-terminally processed	PRMT5	N/C	20727000000	40382000000	21304000000	16321000000	865460000	887390000	995240000	46.6596	24.0075	16.3991	0.513273	1.46395	0.514524	28025000000	31341000000	19814000000	16598000000	876600000	1078500000	1138700000	35.7529	18.3718	14.5763	0.894196	1.26039	0.513855	24911000000	20854000000	6232800000	11453000000	234260000	547210000	689590000	89.0207	11.3901	16.6084	1.19454	0.685805	0.127949	8024800000	13160000000	11098000000	11821000000	747130000	737750000	625580000	17.6141
26S protease regulatory subunit 6B	PSMC4	N/C	4836400	10175000	0	28514000	865460000	887390000	995240000	0.0117568	0	0.0286504	0.475322	0	0	22732000	41564000	40460000	8333600	876600000	1078500000	1138700000	0.047415	0.0375151	0.00731852	0.546916	5.12604	0.791207	0	6473400	8718200	8058600	234260000	547210000	689590000	0.0276334	0.0159321	0.0116861	0	1.36334	0.576552	46666000	28533000	36770000	25091000	747130000	737750000	625580000	0.0381901
26S proteasome non-ATPase regulatory subunit 4	PSMD4	N/A	77886000	233050000	89340000	190030000	865460000	887390000	995240000	0.269279	0.100677	0.190939	0.334203	0.527275	0.373877	191080000	164560000	21175000	178980000	876600000	1078500000	1138700000	0.187725	0.0196338	0.157179	1.16116	0.124913	0.104588	0	93623000	41830000	284080000	234260000	547210000	689590000	0.399654	0.0764423	0.411955	0	0.18556	0.191271	29142000	112140000	103570000	94306000	747130000	737750000	625580000	0.150094
Ankycorbin	RAI14	N/C	13572000	82777000	87083000	26717000	865460000	887390000	995240000	0.0956451	0.0981339	0.0268448	0.163959	3.6556	1.02602	0	139310000	0	0	876600000	1078500000	1138700000	0.158921	0	0	0	0	0	0	0	0	0	234260000	547210000	689590000	0	0	0	0	0	0	32281000	42503000	44138000	55357000	747130000	737750000	625580000	0.0568884
Histone-binding protein RBBP4	RBBP4	N	0	15489000	63904000	27668000	865460000	887390000	995240000	0.0178968	0.0720134	0.0278003	0	2.59038	4.02381	11050000	13859000	19565000	54353000	876600000	1078500000	1138700000	0.0158099	0.0181409	0.0477325	0.797316	0.380054	1.14744	4376000	0	39471000	90359000	234260000	547210000	689590000	0	0.0721314	0.131033	∞	0.550483	∞	0	16719000	16840000	15375000	747130000	737750000	625580000	0.0223776
60S ribosomal protein L10a	RPL10A	C	39184000	70560000	11172000	81820000	865460000	887390000	995240000	0.0815289	0.0125897	0.0822113	0.555329	0.153139	0.15442	74253000	72164000	63259000	60967000	876600000	1078500000	1138700000	0.0823226	0.0586546	0.0535409	1.02895	1.09551	0.712497	102670000	37275000	16069000	60828000	234260000	547210000	689590000	0.159118	0.0293653	0.0882089	2.75439	0.332906	0.184551	78435000	104720000	104420000	100860000	747130000	737750000	625580000	0.140163
60S ribosomal protein L12	RPL12	C	122150000	120930000	8167100	23853000	865460000	887390000	995240000	0.139729	0.00920351	0.0239671	1.01009	0.384006	0.0658668	209800000	81312000	62954000	34263000	876600000	1078500000	1138700000	0.0927584	0.0583718	0.0300896	2.58018	1.93993	0.629289	152450000	0	0	15869000	234260000	547210000	689590000	0	0	0.0230122	∞	0	0	78622000	112080000	83540000	99308000	747130000	737750000	625580000	0.150014
60S ribosomal protein L13	RPL13	C	42211000	58459000	38502000	50902000	865460000	887390000	995240000	0.0675467	0.0433879	0.0511455	0.722062	0.848324	0.642339	159020000	49275000	84827000	44694000	876600000	1078500000	1138700000	0.0562115	0.0786528	0.03925	3.22719	2.00389	1.39923	109260000	36723000	14846000	31184000	234260000	547210000	689590000	0.156762	0.0271304	0.0452211	2.97525	0.599949	0.173067	51704000	66591000	21020000	17212000	747130000	737750000	625580000	0.0891291
60S ribosomal protein L15	RPL15	C	13848000	0	15396000	4539700	865460000	887390000	995240000	0	0.0173498	0.00456141	∞	3.80359	∞	65430000	0	8992400	5072500	876600000	1078500000	1138700000	0	0.00833788	0.00445464	∞	1.87173	∞	66716000	19722000	0	5532900	234260000	547210000	689590000	0.0841885	0	0.00802346	3.38282	0	0	90053000	92823000	67893000	72958000	747130000	737750000	625580000	0.124239
60S ribosomal protein L19	RPL19	C	38623000	48213000	54947000	22260000	865460000	887390000	995240000	0.0557079	0.0619198	0.0223665	0.801091	2.76842	1.11151	190940000	25720000	128260000	52394000	876600000	1078500000	1138700000	0.0293406	0.118924	0.0460121	7.42379	2.58463	4.05323	127590000	44668000	83824000	111700000	234260000	547210000	689590000	0.190677	0.153184	0.16198	2.85641	0.945697	0.803371	51556000	60958000	46626000	47447000	747130000	737750000	625580000	0.0815895
60S ribosomal protein L24	RPL24	C	45598000	99937000	0	44547000	865460000	887390000	995240000	0.115473	0	0.0447601	0.456267	0	0	128980000	89310000	50558000	46536000	876600000	1078500000	1138700000	0.101882	0.0468781	0.0408677	1.44418	1.14707	0.46012	38099000	0	10717000	17894000	234260000	547210000	689590000	0	0.0195848	0.0259488	∞	0.754749	∞	56209000	69817000	58447000	58510000	747130000	737750000	625580000	0.0934469
60S ribosomal protein L3	RPL3	C	15638000	11867000	76258000	7190800	865460000	887390000	995240000	0.0137118	0.0859352	0.00722519	1.31777	11.8938	6.26725	145010000	18011000	92041000	51200000	876600000	1078500000	1138700000	0.0205464	0.0853417	0.0449636	8.05119	1.89802	4.1536	67129000	0	0	9405500	234260000	547210000	689590000	0	0	0.0136393	∞	0	0	76358000	89430000	101840000	94683000	747130000	737750000	625580000	0.119698
60S ribosomal protein L30	RPL30	C	110900000	47647000	0	65792000	865460000	887390000	995240000	0.055054	0	0.0661067	2.32753	0	0	249470000	36168000	65835000	46686000	876600000	1078500000	1138700000	0.0412594	0.0610431	0.0409994	6.89753	1.48888	1.4795	0	36730000	19176000	44505000	234260000	547210000	689590000	0.156792	0.0350432	0.0645383	0	0.542983	0.223502	92525000	120390000	75185000	108200000	747130000	737750000	625580000	0.161137
60S ribosomal protein L36	RPL36	C	0	0	0	0	865460000	887390000	995240000	0	0	0	0	0	0	19028000	0	0	0	876600000	1078500000	1138700000	0	0	0	∞	0	0	0	0	0	0	234260000	547210000	689590000	0	0	0	0	0	0	7391600	10735000	9975500	10131000	747130000	737750000	625580000	0.0143683
60S ribosomal protein L38	RPL38	C	0	42155000	0	64397000	865460000	887390000	995240000	0.0487082	0	0.064705	0	0	0	79980000	0	53688000	53591000	876600000	1078500000	1138700000	0	0.0497803	0.0470633	∞	1.05773	∞	64876000	0	0	24494000	234260000	547210000	689590000	0	0	0.0355197	∞	0	0	50769000	58742000	62184000	58031000	747130000	737750000	625580000	0.0786235
60S ribosomal protein L6	RPL6	C	12849000	7236500	60177000	0	865460000	887390000	995240000	0.00836145	0.0678135	0	1.77558	∞	8.11025	54271000	9009800	9823400	6270600	876600000	1078500000	1138700000	0.0102781	0.00910839	0.00550681	6.02355	1.65402	0.886192	15636000	2475200	0	0	234260000	547210000	689590000	0.010566	0	0	6.31707	0	0	43328000	77779000	50531000	45926000	747130000	737750000	625580000	0.104104
60S ribosomal protein L7	RPL7	C	1554800	28846000	46922000	7416400	865460000	887390000	995240000	0.0333303	0.0528764	0.00745187	0.0539	7.09572	1.58644	48727000	43676000	10152000	9854300	876600000	1078500000	1138700000	0.0498243	0.00941307	0.00865399	1.11565	1.08771	0.188925	119870000	18933000	5071400	0	234260000	547210000	689590000	0.0808205	0.00926774	0	6.33127	∞	0.114671	83806000	133270000	142820000	103040000	747130000	737750000	625580000	0.178376
Protein transport protein Sec61 subunit alpha isoform 2;Protein transport protein Sec61 subunit alpha isoform 1	SEC61A2;SEC61A1	ER	0	0	0	0	865460000	887390000	995240000	0	0	0	0	0	0	0	0	0	0	876600000	1078500000	1138700000	0	0	0	0	0	0	0	0	0	0	234260000	547210000	689590000	0	0	0	0	0	0	0	3394600	4652400	5522600	747130000	737750000	625580000	0.00454352
Solute carrier family 2, facilitated glucose transporter member 1	SLC2A1	Membrane	0	15987000	0	0	865460000	887390000	995240000	0.0184723	0	0	0	0	0	0	25303000	26616000	0	876600000	1078500000	1138700000	0.0288649	0.0246787	0	0	∞	0.854972	0	0	0	0	234260000	547210000	689590000	0	0	0	0	0	0	0	6247600	4913400	5373300	747130000	737750000	625580000	0.00836213
Sulfide:quinone oxidoreductase, mitochondrial	SQRDL	M	51535000	212850000	69825000	86178000	865460000	887390000	995240000	0.245939	0.0786858	0.0865902	0.242119	0.908715	0.319941	165690000	189680000	74146000	112780000	876600000	1078500000	1138700000	0.216381	0.0687492	0.0990428	0.873524	0.694136	0.317722	197410000	64248000	10785000	111830000	234260000	547210000	689590000	0.274259	0.0197091	0.162169	3.07262	0.121534	0.0718629	71685000	102350000	115960000	116160000	747130000	737750000	625580000	0.136991
Serine/threonine-protein kinase 38-like	STK38L	C	7345600	129340000	61583000	114510000	865460000	887390000	995240000	0.149447	0.0693979	0.115058	0.0567929	0.603157	0.464366	66533000	52923000	92104000	92150000	876600000	1078500000	1138700000	0.060373	0.0854001	0.0809256	1.25717	1.05529	1.41454	19292000	131420000	39650000	130010000	234260000	547210000	689590000	0.561001	0.0724585	0.188532	0.146797	0.384329	0.129159	64937000	138130000	128050000	117590000	747130000	737750000	625580000	0.184881
Sin3 histone deacetylase corepressor complex component SDS3	SUDS3	N	0	0	0	0	865460000	887390000	995240000	0	0	0	0	0	0	0	0	0	0	876600000	1078500000	1138700000	0	0	0	0	0	0	0	0	0	0	234260000	547210000	689590000	0	0	0	0	0	0	0	16363000	16720000	12865000	747130000	737750000	625580000	0.0219011
Dual specificity testis-specific protein kinase 2	TESK2	N	0	88891000	0	0	865460000	887390000	995240000	0.10271	0	0	0	0	0	0	0	0	0	876600000	1078500000	1138700000	0	0	0	0	0	0	0	0	0	0	234260000	547210000	689590000	0	0	0	0	0	0	0	3548100	4210900	4426200	747130000	737750000	625580000	0.00474897
Tropomodulin-3	TMOD3	C	4964400000	12974000000	4755800000	5831800000	865460000	887390000	995240000	14.9909	5.35931	5.85969	0.382642	0.914606	0.357505	11872000000	8815600000	6135400000	6803400000	876600000	1078500000	1138700000	10.0566	5.68883	5.97471	1.3467	0.952151	0.565682	8897200000	5565600000	3246400000	5125300000	234260000	547210000	689590000	23.7582	5.93264	7.43239	1.59861	0.798215	0.249709	3553600000	6308500000	4352300000	5453400000	747130000	737750000	625580000	8.44364
Target of Myb protein 1	TOM1	C	0	0	18905000	27510000	865460000	887390000	995240000	0	0.021304	0.0276416	0	0.770725	∞	0	0	25277000	34469000	876600000	1078500000	1138700000	0	0.0234372	0.0302705	0	0.774259	∞	0	53692000	24643000	22405000	234260000	547210000	689590000	0.229198	0.0450339	0.0324903	0	1.38607	0.196484	21384000	92031000	61989000	76432000	747130000	737750000	625580000	0.123179
WD repeat-containing protein 26	WDR26	N/C	0	59511000	0	20596000	865460000	887390000	995240000	0.0687623	0	0.0206945	0	0	0	0	55082000	40393000	43275000	876600000	1078500000	1138700000	0.062836	0.0374529	0.0380039	0	0.985504	0.596043	11393000	16945000	14755000	17261000	234260000	547210000	689590000	0.0723342	0.0269641	0.0250308	0.672352	1.07723	0.372771	0	10374000	21148000	10253000	747130000	737750000	625580000	0.0138851
Actin, cytoplasmic 2;Actin, cytoplasmic 2, N-terminally processed	ACTG1		41158000000	185770000000	165440000000	124430000000	865460000	887390000	995240000	214.649	186.434	125.025	#NAME?	#NAME?	#NAME?	67069000000	131150000000	155340000000	90397000000	876600000	1078500000	1138700000	149.612	144.033	79.3861	#NAME?	#NAME?	#NAME?	60182000000	113210000000	81856000000	114550000000	234260000	547210000	689590000	483.266	149.588	166.113	#NAME?	#NAME?	#NAME?	29908000000	26295000000	29802000000	25880000000	747130000	737750000	625580000	35.1947
Ankyrin repeat domain-containing protein 26	ANKRD26		250670000	0	14193000	0	865460000	887390000	995240000	0	0.0159941	0	∞	∞	∞	33756000	62260000	0	22526000	876600000	1078500000	1138700000	0.0710244	0	0.0197822	0.542178	0	0	0	0	0	0	234260000	547210000	689590000	0	0	0	0	0	0	38804000	75065000	79789000	69240000	747130000	737750000	625580000	0.100471
Annexin A1	ANXA1		376320000	1564200000	436770000	635930000	865460000	887390000	995240000	1.80736	0.492196	0.638972	0.240583	0.770294	0.272328	1255900000	1603600000	1011400000	669090000	876600000	1078500000	1138700000	1.82934	0.937784	0.587591	0.783175	1.59598	0.512635	781900000	573820000	231400000	600120000	234260000	547210000	689590000	2.4495	0.422872	0.870256	1.36262	0.485917	0.172636	125330000	478690000	668810000	572900000	747130000	737750000	625580000	0.640705
Actin-related protein 2/3 complex subunit 2	ARPC2		244940000	1376000000	630630000	776990000	865460000	887390000	995240000	1.58991	0.710657	0.780706	0.178009	0.910275	0.446981	431710000	835260000	754950000	889100000	876600000	1078500000	1138700000	0.952841	0.7	0.780803	0.516857	0.896513	0.734645	1108500000	614090000	126080000	661030000	234260000	547210000	689590000	2.6214	0.230405	0.958584	1.80511	0.24036	0.0878938	803790000	611630000	822420000	642500000	747130000	737750000	625580000	0.818639
Actin-related protein 2/3 complex subunit 5	ARPC5		0	189510000	79610000	85053000	865460000	887390000	995240000	0.21897	0.0897125	0.0854598	0	1.04976	0.409702	0	0	0	72473000	876600000	1078500000	1138700000	0	0	0.0636454	0	0	0	0	0	0	43906000	234260000	547210000	689590000	0	0	0.0636697	0	0	0	169730000	71261000	79651000	124320000	747130000	737750000	625580000	0.0953797
Bcl-2-associated transcription factor 1	BCLAF1		0	181410000	101190000	145740000	865460000	887390000	995240000	0.209611	0.114031	0.146437	0	0.778703	0.544012	0	123970000	28864000	125320000	876600000	1078500000	1138700000	0.141421	0.0267631	0.110055	0	0.243179	0.189244	21612000	100530000	27961000	57160000	234260000	547210000	689590000	0.429139	0.0510974	0.0828898	0.214981	0.616449	0.11907	9579700	42903000	89015000	68606000	747130000	737750000	625580000	0.0574237
Complement C3;Complement C3 beta chain;C3-beta-c;Complement C3 alpha chain;C3a anaphylatoxin;Acylation stimulating protein;Complement C3b alpha chain;Complement C3c alpha chain fragment 1;Complement C3dg fragment;Complement C3g fragment;Complement C3d fragment;Complement C3f fragment;Complement C3c alpha chain fragment 2	C3		11344000	32370000	0	0	865460000	887390000	995240000	0.0374021	0	0	0.350448	0	0	21270000	37468000	15120000	1130200	876600000	1078500000	1138700000	0.0427424	0.0140195	0.000992535	0.567684	14.1249	0.327999	18277000	0	95292000	0	234260000	547210000	689590000	0	0.174142	0	∞	∞	∞	4151800	5164800	5934500	4404400	747130000	737750000	625580000	0.00691285
Calcium/calmodulin-dependent protein kinase type II subunit gamma	CAMK2G		423500000	23214000	0	7785700	865460000	887390000	995240000	0.0268227	0	0.00782294	18.2433	0	0	575240000	0	0	0	876600000	1078500000	1138700000	0	0	0	∞	0	0	143190000	0	0	5569200	234260000	547210000	689590000	0	0	0.0080761	∞	0	0	106760000	673070000	344160000	369530000	747130000	737750000	625580000	0.900874
Cullin-associated NEDD8-dissociated protein 1	CAND1		2529200	0	9461900	0	865460000	887390000	995240000	0	0.0106626	0	∞	∞	∞	9773900	11147000	16697000	0	876600000	1078500000	1138700000	0.0127162	0.0154817	0	0.876819	∞	1.21748	9940500	0	0	0	234260000	547210000	689590000	0	0	0	∞	0	0	2647500	13022000	8396800	5182600	747130000	737750000	625580000	0.0174294
Calnexin	CANX		45789000	95383000	18103000	41340000	865460000	887390000	995240000	0.110211	0.0204003	0.0415377	0.480054	0.491127	0.185102	62144000	71511000	65537000	74585000	876600000	1078500000	1138700000	0.0815777	0.0607668	0.0655001	0.869013	0.927736	0.744895	48886000	60391000	34973000	46162000	234260000	547210000	689590000	0.257795	0.0639115	0.0669412	0.809491	0.95474	0.247916	41003000	38370000	41227000	44358000	747130000	737750000	625580000	0.0513565
F-actin-capping protein subunit alpha-1;F-actin-capping protein subunit alpha-2	CAPZA1;CAPZA2		12470000	20312000	13487000	9262300	865460000	887390000	995240000	0.0234696	0.0151985	0.0093066	0.613923	1.63309	0.647583	29668000	0	22934000	18002000	876600000	1078500000	1138700000	0	0.0212647	0.0158093	∞	1.34508	∞	0	21170000	14182000	17280000	234260000	547210000	689590000	0.0903697	0.0259169	0.0250584	0	1.03426	0.286788	16512000	5845800	7308000	5597700	747130000	737750000	625580000	0.00782434
T-complex protein 1 subunit beta	CCT2		3450500	0	100960000	125220000	865460000	887390000	995240000	0	0.113772	0.125819	∞	0.904251	∞	0	59656000	200590000	156600000	876600000	1078500000	1138700000	0.0680538	0.18599	0.137525	0	1.3524	2.73298	21287000	0	5631400	91864000	234260000	547210000	689590000	0	0.0102911	0.133215	∞	0.0772517	∞	24838000	59842000	141000000	95556000	747130000	737750000	625580000	0.0800958
T-complex protein 1 subunit delta	CCT4		0	20644000	43183000	16175000	865460000	887390000	995240000	0.0238532	0.0486629	0.0162524	0	2.99421	2.0401	7811700	0	51123000	31394000	876600000	1078500000	1138700000	0	0.0474019	0.02757	∞	1.71933	∞	0	7605700	13649000	34252000	234260000	547210000	689590000	0.0324669	0.0249429	0.0496701	0	0.502171	0.768256	5210800	30916000	67172000	71763000	747130000	737750000	625580000	0.0413797
T-complex protein 1 subunit epsilon	CCT5		0	35229000	6784200	56961000	865460000	887390000	995240000	0.0407055	0.00764512	0.0572334	0	0.133578	0.187815	30789000	60363000	108970000	30625000	876600000	1078500000	1138700000	0.0688604	0.101038	0.0268947	0.510064	3.75682	1.4673	8195100	24070000	0	96856000	234260000	547210000	689590000	0.102749	0	0.140454	0.340469	0	0	8215800	49120000	60591000	52055000	747130000	737750000	625580000	0.0657449
T-complex protein 1 subunit zeta	CCT6A		0	0	68930000	0	865460000	887390000	995240000	0	0.0776772	0	0	∞	∞	0	17215000	10932000	17767000	876600000	1078500000	1138700000	0.0196384	0.0101363	0.0156029	0	0.649643	0.516148	0	0	3562900	20774000	234260000	547210000	689590000	0	0.00651103	0.0301251	0	0.216133	∞	11397000	67793000	68732000	65004000	747130000	737750000	625580000	0.0907379
Cell division cycle 5-like protein	CDC5L		0	0	0	14275000	865460000	887390000	995240000	0	0	0.0143433	0	0	0	0	0	5500700	9125600	876600000	1078500000	1138700000	0	0.00510032	0.00801405	0	0.636423	∞	0	0	0	0	234260000	547210000	689590000	0	0	0	0	0	0	4953800	6913200	9031600	9844000	747130000	737750000	625580000	0.00925301
NADH-cytochrome b5 reductase 3;NADH-cytochrome b5 reductase 3 membrane-bound form;NADH-cytochrome b5 reductase 3 soluble form	CYB5R3		26428000	41733000	0	14424000	865460000	887390000	995240000	0.0482206	0	0.014493	0.633264	0	0	52282000	34639000	62887000	29388000	876600000	1078500000	1138700000	0.0395152	0.0583097	0.0258084	1.50934	2.25933	1.47563	25613000	0	17108000	0	234260000	547210000	689590000	0	0.031264	0	∞	∞	∞	18122000	14280000	12079000	10581000	747130000	737750000	625580000	0.0191131
ATP-dependent RNA helicase DDX3X;ATP-dependent RNA helicase DDX3Y	DDX3X;DDX3Y		7499300	29513000	4514300	25030000	865460000	887390000	995240000	0.0341009	0.00508717	0.0251497	0.254102	0.202275	0.14918	57801000	0	9386000	26283000	876600000	1078500000	1138700000	0	0.00870283	0.0230816	∞	0.377046	∞	14023000	31051000	2734300	41933000	234260000	547210000	689590000	0.132549	0.0049968	0.0608086	0.451612	0.0821726	0.0376977	34772000	38472000	38853000	23743000	747130000	737750000	625580000	0.051493
Dedicator of cytokinesis protein 8	DOCK8		0	0	0	0	865460000	887390000	995240000	0	0	0	0	0	0	0	0	0	0	876600000	1078500000	1138700000	0	0	0	0	0	0	0	0	0	0	234260000	547210000	689590000	0	0	0	0	0	0	0	4571000	5655800	4755200	747130000	737750000	625580000	0.00611808
Dynein light chain 1, cytoplasmic;Dynein light chain 2, cytoplasmic	DYNLL1;DYNLL2		21681000	11241000	15619000	0	865460000	887390000	995240000	0.0129885	0.0176011	0	1.92874	∞	1.35513	47439000	17108000	0	0	876600000	1078500000	1138700000	0.0195163	0	0	2.77291	0	0	0	0	0	0	234260000	547210000	689590000	0	0	0	0	0	0	7546600	9089300	10888000	15747000	747130000	737750000	625580000	0.0121656
Protein SGT1	ECD		0	0	0	0	865460000	887390000	995240000	0	0	0	0	0	0	0	0	0	0	876600000	1078500000	1138700000	0	0	0	0	0	0	0	0	0	0	234260000	547210000	689590000	0	0	0	0	0	0	8949600	14636000	8459100	6919000	747130000	737750000	625580000	0.0195896
Eukaryotic translation initiation factor 2 subunit 1	EIF2S1		18619000	86559000	69301000	59270000	865460000	887390000	995240000	0.100015	0.0780953	0.0595535	0.215102	1.31135	0.780836	39039000	42527000	47186000	4435600	876600000	1078500000	1138700000	0.0485136	0.0437515	0.00389532	0.917982	11.2318	0.90184	0	4219000	0	40781000	234260000	547210000	689590000	0.0180099	0	0.059138	0	0	0	12861000	19123000	20214000	8232800	747130000	737750000	625580000	0.0255953
Eukaryotic translation initiation factor 2 subunit 3;Putative eukaryotic translation initiation factor 2 subunit 3-like protein	EIF2S3;EIF2S3L		48511000	205130000	12801000	38533000	865460000	887390000	995240000	0.237018	0.0144254	0.0387173	0.236489	0.372584	0.0608621	77364000	80536000	42230000	38158000	876600000	1078500000	1138700000	0.0918731	0.0391562	0.0335101	0.960614	1.16849	0.426199	0	18123000	10183000	14231000	234260000	547210000	689590000	0.0773628	0.0186089	0.0206369	0	0.901732	0.240541	34313000	23816000	30899000	18222000	747130000	737750000	625580000	0.0318766
Engulfment and cell motility protein 2	ELMO2		20851000	50686000	31107000	8115200	865460000	887390000	995240000	0.0585654	0.0350545	0.00815401	0.411376	4.29905	0.598553	48158000	24701000	8005000	7573100	876600000	1078500000	1138700000	0.0281782	0.00742235	0.00665065	1.94964	1.11603	0.263407	0	0	0	6631500	234260000	547210000	689590000	0	0	0.00961658	0	0	0	20615000	18995000	16170000	15525000	747130000	737750000	625580000	0.025424
Fragile X mental retardation syndrome-related protein 1	FXR1		0	0	0	3915200	865460000	887390000	995240000	0	0	0.00393393	0	0	0	0	0	0	0	876600000	1078500000	1138700000	0	0	0	0	0	0	0	0	0	0	234260000	547210000	689590000	0	0	0	0	0	0	6539300	19299000	16560000	20010000	747130000	737750000	625580000	0.0258308
Transcriptional repressor p66-beta	GATAD2B		0	0	0	0	865460000	887390000	995240000	0	0	0	0	0	0	0	15338000	0	0	876600000	1078500000	1138700000	0.0174971	0	0	0	0	0	0	0	0	0	234260000	547210000	689590000	0	0	0	0	0	0	0	4841000	5027800	449720	747130000	737750000	625580000	0.00647946
Glucose-induced degradation protein 8 homolog	GID8		0	11377000	6701800	17894000	865460000	887390000	995240000	0.0131456	0.00755226	0.0179796	0	0.420046	0.574508	9822800	12394000	0	12096000	876600000	1078500000	1138700000	0.0141387	0	0.0106226	0.792545	0	0	0	39276000	8322200	13997000	234260000	547210000	689590000	0.16766	0.0152084	0.0202976	0	0.749273	0.09071	0	9979600	10217000	7230500	747130000	737750000	625580000	0.0133572
Gelsolin	GSN		386740000	3651600000	2301100000	1605800000	865460000	887390000	995240000	4.21926	2.59311	1.61348	0.10591	1.60715	0.614589	852820000	2764600000	1395700000	1909400000	876600000	1078500000	1138700000	3.15378	1.29411	1.67682	0.308479	0.771764	0.410337	880250000	800150000	242630000	933140000	234260000	547210000	689590000	3.41565	0.443395	1.35318	1.10011	0.327668	0.129813	947450000	668170000	592540000	848450000	747130000	737750000	625580000	0.894316
Histone H2B type 1-L;Histone H2B type 1-M;Histone H2B type 1-N;Histone H2B type 1-H;Histone H2B type 2-F;Histone H2B type 1-C/E/F/G/I;Histone H2B type 1-D;Histone H2B type F-S;Histone H2B type 1-K;Histone H2B type 3-B;Histone H2B type 2-E;Histone H2B type 1-B;Histone H2B type 1-O;Histone H2B type 1-J;Histone H2B type 1-A	HIST1H2BL;HIST1H2BM;HIST1H2BN;HIST1H2BH;HIST2H2BF;HIST1H2BC;HIST1H2BD;H2BFS;HIST1H2BK;HIST3H2BB;HIST2H2BE;HIST1H2BB;HIST1H2BO;HIST1H2BJ;HIST1H2BA		11416000	195710000	151590	62792000	865460000	887390000	995240000	0.226134	0.000170827	0.0630923	0.0583312	0.00270757	0.000755423	22345000	127430000	69253000	88474000	876600000	1078500000	1138700000	0.145368	0.0642123	0.0776974	0.175351	0.826441	0.441721	52571000	73703000	12070000	0	234260000	547210000	689590000	0.314621	0.0220573	0	0.713282	∞	0.0701078	47596000	78687000	63131000	85509000	747130000	737750000	625580000	0.105319
Histone H2A type 2-C;Histone H2A type 2-A	HIST2H2AC;HIST2H2AA3		5068000	242660000	28175000	34114000	865460000	887390000	995240000	0.280383	0.0317504	0.0342772	0.0208852	0.926285	0.11324	14196000	39819000	84567000	67813000	876600000	1078500000	1138700000	0.0454244	0.0784117	0.059553	0.356513	1.31667	1.7262	0	39569000	0	0	234260000	547210000	689590000	0.168911	0	0	0	0	0	57095000	82681000	65554000	125530000	747130000	737750000	625580000	0.110665
Heterogeneous nuclear ribonucleoprotein M	HNRNPM		18191000	15309000	0	0	865460000	887390000	995240000	0.0176889	0	0	1.18826	0	0	16115000	14625000	0	0	876600000	1078500000	1138700000	0.0166838	0	0	1.10188	0	0	15078000	0	0	0	234260000	547210000	689590000	0	0	0	∞	0	0	85313000	84036000	86662000	83771000	747130000	737750000	625580000	0.112478
Little elongation complex subunit 1	ICE1		0	6340200	8660100	4372800	865460000	887390000	995240000	0.00732582	0.00975907	0.00439371	0	2.22114	1.33215	0	1408400	0	0	876600000	1078500000	1138700000	0.00160666	0	0	0	0	0	0	0	0	0	234260000	547210000	689590000	0	0	0	0	0	0	0	1551000	1037300	1471400	747130000	737750000	625580000	0.00207594
Ig gamma-2 chain C region	IGHG2		77493000	712690000	119180000	228900000	865460000	887390000	995240000	0.823481	0.134304	0.229995	0.108733	0.583944	0.163093	102250000	689550000	93133000	190180000	876600000	1078500000	1138700000	0.786619	0.0863542	0.167015	0.148285	0.517044	0.109779	0	61468000	150730000	301220000	234260000	547210000	689590000	0.262392	0.275452	0.43681	0	0.630598	1.04977	108450000	0	196720000	0	747130000	737750000	625580000	0
Influenza virus NS1A-binding protein	IVNS1ABP		0	40160000	19640000	0	865460000	887390000	995240000	0.0464031	0.0221323	0	0	∞	0.476958	22307000	72512000	5471700	35194000	876600000	1078500000	1138700000	0.0827196	0.00507344	0.0309072	0.307632	0.164151	0.0613329	0	43731000	0	0	234260000	547210000	689590000	0.186677	0	0	0	0	0	11785000	48175000	41136000	39530000	747130000	737750000	625580000	0.0644801
LIM domain and actin-binding protein 1	LIMA1		6443200	239670000	95494000	40533000	865460000	887390000	995240000	0.276928	0.107612	0.0407269	0.0268836	2.64229	0.388593	5672600	0	60514000	0	876600000	1078500000	1138700000	0	0.0561094	0	∞	∞	∞	15703000	178180000	62490000	222160000	234260000	547210000	689590000	0.760608	0.114197	0.322162	0.08813	0.354472	0.15014	5259800	13103000	11974000	7959300	747130000	737750000	625580000	0.0175378
Methyl-CpG-binding domain protein 3	MBD3		0	0	26703000	3356700	865460000	887390000	995240000	0	0.0300916	0.00337275	0	8.92197	∞	0	0	0	5377800	876600000	1078500000	1138700000	0	0	0.00472275	0	0	0	0	0	0	0	234260000	547210000	689590000	0	0	0	0	0	0	0	7102500	8451900	7460200	747130000	737750000	625580000	0.00950638
C-Myc-binding protein	MYCBP		11162000	34302000	17787000	0	865460000	887390000	995240000	0.0396344	0.0200442	0	0.325404	∞	0.505727	0	13989000	11455000	43740000	876600000	1078500000	1138700000	0.0159582	0.0106212	0.0384122	0	0.276507	0.665564	0	0	0	21995000	234260000	547210000	689590000	0	0	0.0318958	0	0	0	4580500	10194000	4165100	15343000	747130000	737750000	625580000	0.0136442
Myosin-10	MYH10		77601000	533220000	646650000	458120000	865460000	887390000	995240000	0.616112	0.72871	0.460311	0.145533	1.58308	1.18276	178850000	1044900000	592110000	476250000	876600000	1078500000	1138700000	1.19199	0.549013	0.41824	0.171165	1.31267	0.460584	255830000	602710000	288830000	765810000	234260000	547210000	689590000	2.57283	0.527823	1.11053	0.424466	0.475289	0.205153	548970000	198730000	211790000	211820000	747130000	737750000	625580000	0.265991
Myosin light polypeptide 6	MYL6		570440000	5778600000	4172000000	2482500000	865460000	887390000	995240000	6.67691	4.70143	2.49437	0.098716	1.88481	0.704132	2679900000	4636300000	3339400000	2283700000	876600000	1078500000	1138700000	5.28896	3.09634	2.00553	0.578026	1.5439	0.585434	2255300000	5000900000	2439200000	3208600000	234260000	547210000	689590000	21.3476	4.45752	4.65291	0.450979	0.958007	0.208806	7762000000	1949000000	2601200000	2118400000	747130000	737750000	625580000	2.60865
Unconventional myosin-XVIIIa	MYO18A		15150000	129060000	39195000	159260000	865460000	887390000	995240000	0.149123	0.0441689	0.160022	0.117387	0.276018	0.296191	164500000	171420000	71465000	144970000	876600000	1078500000	1138700000	0.195551	0.0662633	0.127312	0.959631	0.52048	0.338854	53691000	119920000	22529000	41186000	234260000	547210000	689590000	0.51191	0.0411707	0.0597253	0.447723	0.689333	0.0804256	25002000	13237000	26039000	6922700	747130000	737750000	625580000	0.0177171
Unconventional myosin-Ib	MYO1B		469460000	1529800000	1554500000	1496100000	865460000	887390000	995240000	1.76761	1.75177	1.50326	0.306877	1.16532	0.991034	808360000	3005900000	1794800000	1757200000	876600000	1078500000	1138700000	3.42904	1.66416	1.54316	0.268924	1.07841	0.485314	1017200000	1783500000	652130000	1332400000	234260000	547210000	689590000	7.61334	1.19174	1.93216	0.570339	0.616789	0.156533	2651800000	1779700000	1587100000	1806400000	747130000	737750000	625580000	2.38205
Unconventional myosin-Ic	MYO1C		1041300000	7224200000	3100700000	4481400000	865460000	887390000	995240000	8.34724	3.49418	4.50283	0.144141	0.775996	0.418603	2291500000	4610100000	3253700000	4348100000	876600000	1078500000	1138700000	5.25907	3.01688	3.81848	0.497061	0.790073	0.573652	3536100000	5115100000	1541100000	3382900000	234260000	547210000	689590000	21.8351	2.81629	4.90567	0.691306	0.574088	0.12898	2826100000	1384700000	1681100000	1481100000	747130000	737750000	625580000	1.85336
Cytosolic purine 5-nucleotidase	NT5C2		0	0	0	0	865460000	887390000	995240000	0	0	0	0	0	0	0	0	0	0	876600000	1078500000	1138700000	0	0	0	0	0	0	0	0	0	0	234260000	547210000	689590000	0	0	0	0	0	0	4915600	10076000	10854000	4620100	747130000	737750000	625580000	0.0134863
Olfactory receptor 51B4	OR51B4		63810000	45097000	38494000	61737000	865460000	887390000	995240000	0.0521075	0.0433789	0.0620323	1.41495	0.699296	0.832488	163650000	0	120840000	83238000	876600000	1078500000	1138700000	0	0.112045	0.0730991	∞	1.53277	∞	103610000	60358000	18578000	58407000	234260000	547210000	689590000	0.257654	0.0339504	0.0846982	1.71659	0.40084	0.131767	0	33415000	59383000	48901000	747130000	737750000	625580000	0.0447245
Plasminogen;Plasmin heavy chain A;Activation peptide;Angiostatin;Plasmin heavy chain A, short form;Plasmin light chain B	PLG		21851000	53900000	28629000	26074000	865460000	887390000	995240000	0.062279	0.032262	0.0261987	0.405399	1.23144	0.518024	0	57851000	25027000	11421000	876600000	1078500000	1138700000	0.0659948	0.0232054	0.0100299	0	2.31363	0.351625	79805000	0	0	13970000	234260000	547210000	689590000	0	0	0.0202584	∞	0	0	6322400	6584400	10492000	9785500	747130000	737750000	625580000	0.00881292
U4/U6 small nuclear ribonucleoprotein Prp31	PRPF31		0	24709000	58277000	8115700	865460000	887390000	995240000	0.0285501	0.0656724	0.00815452	0	8.0535	2.30025	16638000	49524000	33282000	12691000	876600000	1078500000	1138700000	0.0564956	0.0308595	0.0111452	0.335958	2.76887	0.546229	0	36025000	26596000	20344000	234260000	547210000	689590000	0.153782	0.0486029	0.0295016	0	1.64747	0.31605	9715500	35502000	63726000	45676000	747130000	737750000	625580000	0.0475178
26S protease regulatory subunit 6A	PSMC3		0	0	0	0	865460000	887390000	995240000	0	0	0	0	0	0	18563000	10114000	0	0	876600000	1078500000	1138700000	0.0115378	0	0	1.83538	0	0	0	0	0	0	234260000	547210000	689590000	0	0	0	0	0	0	5481000	7763300	5166300	5274300	747130000	737750000	625580000	0.0103908
26S protease regulatory subunit 8	PSMC5		11100000	0	11912000	9999300	865460000	887390000	995240000	0	0.0134236	0.0100471	∞	1.33607	∞	20421000	0	5324300	4945600	876600000	1078500000	1138700000	0	0.00493676	0.0043432	∞	1.13667	∞	0	0	0	0	234260000	547210000	689590000	0	0	0	0	0	0	413170	6855400	8842000	6880400	747130000	737750000	625580000	0.00917565
26S proteasome non-ATPase regulatory subunit 2	PSMD2		7282600	8029300	11114000	13188000	865460000	887390000	995240000	0.00927749	0.0125244	0.0132511	0.907003	0.945159	1.34997	8441200	17407000	10528000	13539000	876600000	1078500000	1138700000	0.0198574	0.00976171	0.0118899	0.484931	0.82101	0.49159	0	17685000	0	13046000	234260000	547210000	689590000	0.075493	0	0.0189185	0	0	0	8277800	7118800	12762000	10352000	747130000	737750000	625580000	0.00952819
Polymerase I and transcript release factor	PTRF		0	0	0	0	865460000	887390000	995240000	0	0	0	0	0	0	0	0	0	0	876600000	1078500000	1138700000	0	0	0	0	0	0	0	0	0	0	234260000	547210000	689590000	0	0	0	0	0	0	2976300	3686300	3411400	4116600	747130000	737750000	625580000	0.00493395
60S ribosomal protein L10;60S ribosomal protein L10-like	RPL10;RPL10L		10224000	0	7605600	0	865460000	887390000	995240000	0	0.00857075	0	∞	∞	∞	16047000	3170000	6516500	0	876600000	1078500000	1138700000	0.00361624	0.00604219	0	5.06215	∞	1.67085	0	0	0	0	234260000	547210000	689590000	0	0	0	0	0	0	24623000	13137000	20670000	24113000	747130000	737750000	625580000	0.0175833
60S ribosomal protein L11	RPL11		20724000	31164000	0	22769000	865460000	887390000	995240000	0.0360086	0	0.0228779	0.664998	0	0	70957000	28340000	0	0	876600000	1078500000	1138700000	0.0323295	0	0	2.50378	0	0	44960000	0	0	0	234260000	547210000	689590000	0	0	0	∞	0	0	13079000	16295000	24595000	17378000	747130000	737750000	625580000	0.0218101
Putative 60S ribosomal protein L13a protein RPL13AP3;60S ribosomal protein L13a	RPL13AP3;RPL13A		0	0	7164600	0	865460000	887390000	995240000	0	0.00807379	0	0	∞	∞	0	0	0	0	876600000	1078500000	1138700000	0	0	0	0	0	0	0	0	0	0	234260000	547210000	689590000	0	0	0	0	0	0	9906400	27363000	26495000	19576000	747130000	737750000	625580000	0.0366241
60S ribosomal protein L14	RPL14		33895000	0	10948000	24583000	865460000	887390000	995240000	0	0.0123373	0.0247006	∞	0.499474	∞	70498000	14412000	43886000	36591000	876600000	1078500000	1138700000	0.0164408	0.0406917	0.032134	4.89162	1.26631	2.47504	0	27513000	43229000	23440000	234260000	547210000	689590000	0.117446	0.0789989	0.0339912	0	2.3241	0.672638	29880000	33306000	25130000	21720000	747130000	737750000	625580000	0.0445786
60S ribosomal protein L17	RPL17		15493000	12686000	17316000	0	865460000	887390000	995240000	0.0146581	0.0195134	0	1.22127	∞	1.33124	25258000	0	41987000	20656000	876600000	1078500000	1138700000	0	0.0389309	0.01814	∞	2.14614	∞	16179000	10092000	11773000	0	234260000	547210000	689590000	0.0430803	0.0215146	0	1.60315	∞	0.499406	34518000	25434000	23742000	22118000	747130000	737750000	625580000	0.0340423
60S ribosomal protein L18	RPL18		0	0	8421200	0	865460000	887390000	995240000	0	0.00948985	0	0	∞	∞	0	0	7608900	0	876600000	1078500000	1138700000	0	0.00705508	0	0	∞	∞	62792000	20388000	0	0	234260000	547210000	689590000	0.0870315	0	0	3.07985	0	0	61582000	142770000	65714000	45578000	747130000	737750000	625580000	0.191091
60S ribosomal protein L18a	RPL18A		39731000	61817000	0	6506700	865460000	887390000	995240000	0.0714268	0	0.00653782	0.64272	0	0	144490000	24967000	0	0	876600000	1078500000	1138700000	0.0284816	0	0	5.78724	0	0	40087000	8002300	11793000	0	234260000	547210000	689590000	0.0341599	0.0215511	0	5.00943	∞	0.63089	0	39951000	63998000	65494000	747130000	737750000	625580000	0.0534726
60S ribosomal protein L23	RPL23		41839000	57719000	30277000	0	865460000	887390000	995240000	0.0666917	0.0341192	0	0.724874	∞	0.511595	112490000	22942000	0	25152000	876600000	1078500000	1138700000	0.0261716	0	0.0220883	4.90323	0	0	20277000	6057500	0	0	234260000	547210000	689590000	0.025858	0	0	3.34742	0	0	33807000	21820000	29898000	36751000	747130000	737750000	625580000	0.0292051
60S ribosomal protein L27	RPL27		66028000	108120000	60334000	19678000	865460000	887390000	995240000	0.124928	0.0679904	0.0197721	0.610692	3.4387	0.544238	138820000	87160000	76898000	14126000	876600000	1078500000	1138700000	0.0994296	0.0713009	0.0124054	1.5927	5.74758	0.717099	61417000	14218000	0	0	234260000	547210000	689590000	0.0606932	0	0	4.31967	0	0	100460000	89021000	106570000	101220000	747130000	737750000	625580000	0.119151
60S ribosomal protein L27a	RPL27A		0	37536000	0	14383000	865460000	887390000	995240000	0.0433712	0	0.0144518	0	0	0	75937000	62258000	18312000	16814000	876600000	1078500000	1138700000	0.0710221	0.0169791	0.014766	1.21971	1.14988	0.239068	0	0	0	0	234260000	547210000	689590000	0	0	0	0	0	0	21467000	36801000	25862000	25329000	747130000	737750000	625580000	0.0492565
60S ribosomal protein L34	RPL34		0	0	39114000	12597000	865460000	887390000	995240000	0	0.0440776	0.0126572	0	3.4824	∞	0	22277000	15026000	29544000	876600000	1078500000	1138700000	0.025413	0.0139323	0.0259454	0	0.536986	0.548237	0	0	0	7164400	234260000	547210000	689590000	0	0	0.0103894	0	0	0	19129000	16888000	19945000	18986000	747130000	737750000	625580000	0.0226038
60S ribosomal protein L35a	RPL35A		33707000	9503000	33904000	0	865460000	887390000	995240000	0.0109803	0.0382064	0	3.54699	∞	3.47955	0	0	9112200	0	876600000	1078500000	1138700000	0	0.00844896	0	0	∞	∞	0	0	0	0	234260000	547210000	689590000	0	0	0	0	0	0	22638000	18764000	25697000	24153000	747130000	737750000	625580000	0.0251148
60S ribosomal protein L4	RPL4		8801400	73264000	33940000	35943000	865460000	887390000	995240000	0.0846532	0.038247	0.0361149	0.120133	1.05904	0.451808	81575000	13297000	27292000	72497000	876600000	1078500000	1138700000	0.0151688	0.0253055	0.0636665	6.13484	0.39747	1.66826	51449000	17061000	0	50450000	234260000	547210000	689590000	0.0728293	0	0.0731594	3.01559	0	0	56646000	105880000	55673000	80031000	747130000	737750000	625580000	0.141716
60S ribosomal protein L5	RPL5		27501000	45957000	24410000	0	865460000	887390000	995240000	0.0531012	0.0275076	0	0.598407	∞	0.518022	33026000	13088000	0	5683800	876600000	1078500000	1138700000	0.0149304	0	0.00499148	2.52338	0	0	22190000	9971000	17666000	0	234260000	547210000	689590000	0.0425638	0.0322838	0	2.22545	∞	0.758479	5309600	11557000	6466500	3520500	747130000	737750000	625580000	0.0154685
60S ribosomal protein L7a	RPL7A		105660000	145260000	112890000	51689000	865460000	887390000	995240000	0.167841	0.127216	0.0519362	0.727385	2.44946	0.757952	406960000	77322000	112020000	61095000	876600000	1078500000	1138700000	0.0882067	0.103866	0.0536533	5.26319	1.93588	1.17753	73085000	0	0	87323000	234260000	547210000	689590000	0	0	0.12663	∞	0	0	182300000	175990000	187180000	181000000	747130000	737750000	625580000	0.235555
60S ribosomal protein L8	RPL8		91794000	54439000	64534000	0	865460000	887390000	995240000	0.0629018	0.0727234	0	1.68618	∞	1.15614	131170000	55985000	63847000	0	876600000	1078500000	1138700000	0.0638661	0.0591998	0	2.34295	∞	0.926937	54145000	43914000	41664000	15502000	234260000	547210000	689590000	0.187458	0.076139	0.02248	1.23298	3.38696	0.406165	62874000	69462000	112750000	62703000	747130000	737750000	625580000	0.0929718
60S acidic ribosomal protein P0;60S acidic ribosomal protein P0-like	RPLP0;RPLP0P6		169790000	228140000	21205000	105000000	865460000	887390000	995240000	0.263605	0.0238959	0.105502	0.744236	0.226497	0.0906503	487600000	152720000	110500000	107350000	876600000	1078500000	1138700000	0.174219	0.102457	0.0942742	3.19277	1.0868	0.588095	250020000	50943000	3112900	67574000	234260000	547210000	689590000	0.217464	0.00568868	0.0979916	4.90784	0.0580527	0.0261592	224430000	245610000	192370000	184040000	747130000	737750000	625580000	0.328738
60S acidic ribosomal protein P1	RPLP1		64845000	43091000	0	15353000	865460000	887390000	995240000	0.0497897	0	0.0154264	1.50484	0	0	135810000	49804000	23719000	14012000	876600000	1078500000	1138700000	0.056815	0.0219926	0.0123053	2.72689	1.78725	0.387091	68863000	27840000	11640000	18851000	234260000	547210000	689590000	0.118842	0.0212715	0.0273365	2.47353	0.778136	0.17899	148220000	83124000	128730000	61802000	747130000	737750000	625580000	0.111258
60S acidic ribosomal protein P2	RPLP2		25007000	59947000	0	0	865460000	887390000	995240000	0.0692661	0	0	0.417152	0	0	45140000	23294000	0	15254000	876600000	1078500000	1138700000	0.0265731	0	0.013396	1.93784	0	0	0	0	0	0	234260000	547210000	689590000	0	0	0	0	0	0	51848000	28232000	31022000	34625000	747130000	737750000	625580000	0.0377873
40S ribosomal protein S11	RPS11		0	0	0	0	865460000	887390000	995240000	0	0	0	0	0	0	0	0	0	0	876600000	1078500000	1138700000	0	0	0	0	0	0	0	0	0	0	234260000	547210000	689590000	0	0	0	0	0	0	3556800	5448700	4501900	4143500	747130000	737750000	625580000	0.00729284
40S ribosomal protein S27-like;40S ribosomal protein S27	RPS27L;RPS27		0	24104000	0	15473000	865460000	887390000	995240000	0.0278511	0	0.015547	0	0	0	37356000	18268000	16358000	0	876600000	1078500000	1138700000	0.0208396	0.0151674	0	2.04489	∞	0.727814	0	0	0	9104900	234260000	547210000	689590000	0	0	0.0132034	0	0	0	37037000	12191000	3166200	22214000	747130000	737750000	625580000	0.0163171
40S ribosomal protein S4, X isoform	RPS4X		11599000	12377000	14241000	4675000	865460000	887390000	995240000	0.0143011	0.0160482	0.00469736	0.937141	3.41643	1.12217	35857000	13966000	16606000	14314000	876600000	1078500000	1138700000	0.015932	0.0153973	0.0125705	2.56745	1.22488	0.966439	0	4288800	9170800	0	234260000	547210000	689590000	0.0183079	0.0167592	0	0	∞	0.91541	29288000	35071000	30355000	39263000	747130000	737750000	625580000	0.046941
40S ribosomal protein S8	RPS8		22893000	32564000	15324000	30055000	865460000	887390000	995240000	0.0376262	0.0172686	0.0301987	0.703016	0.571832	0.458952	234000000	11229000	75481000	51692000	876600000	1078500000	1138700000	0.0128097	0.069987	0.0453956	20.8389	1.54171	5.46359	10848000	0	5984100	11965000	234260000	547210000	689590000	0	0.0109357	0.0173509	∞	0.630265	∞	150000000	168010000	188470000	147730000	747130000	737750000	625580000	0.224874
40S ribosomal protein S9	RPS9		46787000	97047000	12369000	0	865460000	887390000	995240000	0.112133	0.0139386	0	0.482107	∞	0.124304	123940000	28831000	92945000	23011000	876600000	1078500000	1138700000	0.0328896	0.0861799	0.0202081	4.29884	4.26461	2.62028	57837000	23599000	7162200	0	234260000	547210000	689590000	0.100738	0.0130886	0	2.45082	∞	0.129926	79407000	80801000	83882000	81179000	747130000	737750000	625580000	0.108149
Protein S100-A4	S100A4		986940	4086500	0	7220700	865460000	887390000	995240000	0.00472177	0	0.00725523	0.241512	0	0	2961500	3558100	7570700	8082000	876600000	1078500000	1138700000	0.00405898	0.00701966	0.00709757	0.832326	0.989023	1.72941	0	3992400	0	5788800	234260000	547210000	689590000	0.0170426	0	0.00839455	0	0	0	31723000	1707100	826670	1535900	747130000	737750000	625580000	0.00228488
SCY1-like protein 2	SCYL2		24795000	536320000	138080000	175220000	865460000	887390000	995240000	0.619694	0.155602	0.176058	0.0462317	0.883813	0.251096	166740000	75131000	123860000	136910000	876600000	1078500000	1138700000	0.0857073	0.114845	0.120234	2.21932	0.95518	1.33996	75782000	284850000	123600000	150780000	234260000	547210000	689590000	1.21596	0.225873	0.218652	0.266042	1.03303	0.185758	0	4445500	7363000	7398800	747130000	737750000	625580000	0.0059501
Plasminogen activator inhibitor 1 RNA-binding protein	SERBP1		0	0	0	1681200	865460000	887390000	995240000	0	0	0.00168924	0	0	0	0	7867700	22046000	2385300	876600000	1078500000	1138700000	0.00897525	0.0204414	0.00209476	0	9.75834	2.27753	0	0	10121000	2374400	234260000	547210000	689590000	0	0.0184956	0.00344321	0	5.37163	∞	4874500	46543000	45376000	47210000	747130000	737750000	625580000	0.0622957
Serpin H1	SERPINH1		0	0	0	23040000	865460000	887390000	995240000	0	0	0.0231502	0	0	0	0	0	0	11461000	876600000	1078500000	1138700000	0	0	0.010065	0	0	0	11336000	0	0	0	234260000	547210000	689590000	0	0	0	∞	0	0	0	8587500	7544200	6488800	747130000	737750000	625580000	0.011494
Splicing factor, proline- and glutamine-rich	SFPQ		0	13729000	0	0	865460000	887390000	995240000	0.0158632	0	0	0	0	0	6207200	0	0	0	876600000	1078500000	1138700000	0	0	0	∞	0	0	0	0	0	0	234260000	547210000	689590000	0	0	0	0	0	0	6221500	7884100	5735900	5384300	747130000	737750000	625580000	0.0105525
SLAIN motif-containing protein 2	SLAIN2		3866400	0	0	0	865460000	887390000	995240000	0	0	0	∞	0	0	0	6855600	0	7763300	876600000	1078500000	1138700000	0.00782067	0	0.00681769	0	0	0	0	0	0	0	234260000	547210000	689590000	0	0	0	0	0	0	2512700	4548800	4644200	0	747130000	737750000	625580000	0.00608836
Tricarboxylate transport protein, mitochondrial	SLC25A1		0	11736000	0	0	865460000	887390000	995240000	0.0135604	0	0	0	0	0	0	8250800	0	9540100	876600000	1078500000	1138700000	0.00941227	0	0.00837806	0	0	0	6277400	9190100	0	0	234260000	547210000	689590000	0.0392303	0	0	0.683061	0	0	0	8752100	16515000	15654000	747130000	737750000	625580000	0.0117143
Mitochondrial 2-oxoglutarate/malate carrier protein	SLC25A11		0	0	5424400	0	865460000	887390000	995240000	0	0.00611276	0	0	∞	∞	0	0	9771900	0	876600000	1078500000	1138700000	0	0.00906064	0	0	∞	∞	13067000	0	2475700	8934000	234260000	547210000	689590000	0	0.00452422	0.0129555	∞	0.349212	∞	8285400	19537000	25509000	19739000	747130000	737750000	625580000	0.0261494
Calcium-binding mitochondrial carrier protein SCaMC-1	SLC25A24		0	0	0	0	865460000	887390000	995240000	0	0	0	0	0	0	0	0	0	0	876600000	1078500000	1138700000	0	0	0	0	0	0	0	0	0	0	234260000	547210000	689590000	0	0	0	0	0	0	7360000	7584600	7560200	8395800	747130000	737750000	625580000	0.0101516
Phosphate carrier protein, mitochondrial	SLC25A3		7058100	30699000	19486000	5983900	865460000	887390000	995240000	0.0354713	0.0219588	0.00601252	0.229913	3.65218	0.619057	0	21971000	10077000	7429100	876600000	1078500000	1138700000	0.0250639	0.00934353	0.00652419	0	1.43214	0.372789	26263000	0	0	0	234260000	547210000	689590000	0	0	0	∞	0	0	12984000	26318000	18705000	10327000	747130000	737750000	625580000	0.0352255
ADP/ATP translocase 1	SLC25A4		0	40632000	0	10983000	865460000	887390000	995240000	0.0469484	0	0.0110355	0	0	0	11347000	10798000	0	11539000	876600000	1078500000	1138700000	0.012318	0	0.0101335	1.05084	0	0	61269000	41207000	20356000	16747000	234260000	547210000	689590000	0.175903	0.0371996	0.0242854	1.48686	1.53177	0.211478	15452000	17100000	24736000	23339000	747130000	737750000	625580000	0.0228876
ADP/ATP translocase 2;ADP/ATP translocase 2, N-terminally processed	SLC25A5		298610000	396880000	511560000	268120000	865460000	887390000	995240000	0.458577	0.576477	0.269402	0.752394	2.13984	1.2571	288650000	430700000	426660000	215000000	876600000	1078500000	1138700000	0.49133	0.395605	0.188812	0.670188	2.09523	0.805171	499860000	192490000	95623000	235220000	234260000	547210000	689590000	0.821694	0.174746	0.341101	2.59681	0.512301	0.212666	251820000	298570000	424920000	348600000	747130000	737750000	625580000	0.399623
Transcription initiation factor TFIID subunit 4	TAF4		18694000	0	0	0	865460000	887390000	995240000	0	0	0	∞	0	0	90001000	12726000	0	6907900	876600000	1078500000	1138700000	0.0145175	0	0.00606648	7.07221	0	0	39267000	0	0	0	234260000	547210000	689590000	0	0	0	∞	0	0	4414900	8954800	14679000	14125000	747130000	737750000	625580000	0.0119856
T-complex protein 1 subunit alpha	TCP1		22377000	21300000	51621000	108720000	865460000	887390000	995240000	0.0246112	0.0581717	0.10924	1.05056	0.532513	2.36363	32701000	134690000	80614000	84386000	876600000	1078500000	1138700000	0.15365	0.0747464	0.0741073	0.242787	1.00862	0.48647	26021000	11903000	7789100	42204000	234260000	547210000	689590000	0.0508111	0.0142342	0.0612016	2.18609	0.232579	0.28014	27435000	81351000	145370000	109550000	747130000	737750000	625580000	0.108885
TOM1-like protein 2	TOM1L2		0	13364000	0	9209700	865460000	887390000	995240000	0.0154415	0	0.00925375	0	0	0	0	13335000	7875500	9071000	876600000	1078500000	1138700000	0.0152122	0.00730227	0.0079661	0	0.916668	0.480028	0	13413000	0	24287000	234260000	547210000	689590000	0.0572569	0	0.0352195	0	0	0	0	37544000	42047000	49491000	747130000	737750000	625580000	0.050251
Triosephosphate isomerase	TPI1		256140000	629740000	108760000	426940000	865460000	887390000	995240000	0.727636	0.122562	0.428982	0.406739	0.285704	0.168438	1056600000	577590000	552000000	401250000	876600000	1078500000	1138700000	0.658898	0.511822	0.352376	1.82933	1.45249	0.776785	551120000	682930000	252010000	355580000	234260000	547210000	689590000	2.91527	0.460536	0.51564	0.806993	0.893136	0.157974	211570000	250100000	287370000	253850000	747130000	737750000	625580000	0.334748
Tubulin alpha-1A chain;Tubulin alpha-3C/D chain;Tubulin alpha-3E chain	TUBA1A;TUBA3C;TUBA3E		22980000	85843000	25123000	40364000	865460000	887390000	995240000	0.0991877	0.0283111	0.0405571	0.267698	0.698057	0.28543	63713000	61849000	41504000	49138000	876600000	1078500000	1138700000	0.0705556	0.0384831	0.0431527	1.03014	0.891788	0.545429	64434000	128360000	27928000	52182000	234260000	547210000	689590000	0.547938	0.0510371	0.0756711	0.501979	0.67446	0.0931439	18689000	38301000	28740000	28058000	747130000	737750000	625580000	0.0512642
Tubulin alpha-1B chain;Tubulin alpha-4A chain	TUBA1B;TUBA4A		902110000	2087000000	751240000	1075600000	865460000	887390000	995240000	2.41143	0.846573	1.08074	0.432252	0.783324	0.351066	2073900000	1462700000	1351700000	1448900000	876600000	1078500000	1138700000	1.66861	1.25331	1.27242	1.41786	0.984988	0.751115	1968300000	1481700000	371120000	1061200000	234260000	547210000	689590000	6.32502	0.678204	1.53889	1.32841	0.440711	0.107226	976000000	1123200000	1217500000	1294800000	747130000	737750000	625580000	1.50335
Tubulin beta chain	TUBB		366940000	404850000	110820000	264420000	865460000	887390000	995240000	0.467786	0.124883	0.265685	0.90636	0.470043	0.266966	546160000	483210000	265640000	262490000	876600000	1078500000	1138700000	0.551232	0.246305	0.230517	1.13027	1.06849	0.446826	305890000	270700000	87059000	187490000	234260000	547210000	689590000	1.15555	0.159096	0.271886	1.13	0.585157	0.13768	421060000	308480000	534940000	483150000	747130000	737750000	625580000	0.412887
Tubulin beta-2B chain;Tubulin beta-2A chain	TUBB2B;TUBB2A		0	0	0	0	865460000	887390000	995240000	0	0	0	0	0	0	0	0	0	0	876600000	1078500000	1138700000	0	0	0	0	0	0	0	0	0	0	234260000	547210000	689590000	0	0	0	0	0	0	0	7699200	9403900	8167600	747130000	737750000	625580000	0.010305
Tubulin beta-4B chain;Tubulin beta-4A chain	TUBB4B;TUBB4A		895780000	1608700000	623060000	916390000	865460000	887390000	995240000	1.85878	0.702126	0.920773	0.556835	0.76254	0.377735	1833200000	1784800000	1059000000	983360000	876600000	1078500000	1138700000	2.03605	0.981919	0.863581	1.02712	1.13703	0.482267	1117500000	693230000	262300000	456880000	234260000	547210000	689590000	2.95923	0.479341	0.662539	1.61202	0.723491	0.161981	1014100000	1128900000	1273000000	1167700000	747130000	737750000	625580000	1.51098
Elongation factor Tu, mitochondrial	TUFM		0	5776700	0	30340000	865460000	887390000	995240000	0.00667472	0	0.0304851	0	0	0	0	6648200	5494900	30680000	876600000	1078500000	1138700000	0.00758407	0.00509495	0.026943	0	0.189101	0.671795	0	28538000	0	0	234260000	547210000	689590000	0.121822	0	0	0	0	0	1752500	4817000	15126000	8194800	747130000	737750000	625580000	0.00644734
Vimentin	VIM		0	34960000	0	10764000	865460000	887390000	995240000	0.0403947	0	0.0108155	0	0	0	0	0	0	0	876600000	1078500000	1138700000	0	0	0	0	0	0	0	42686000	8263100	11665000	234260000	547210000	689590000	0.182216	0.0151004	0.0169158	0	0.892679	0.0828708	20677000	45252000	45314000	53765000	747130000	737750000	625580000	0.0605678
Methylosome protein 50	WDR77		2008900000	2067300000	1251800000	1682300000	865460000	887390000	995240000	2.38867	1.41065	1.69035	0.971751	0.834535	0.59056	2670300000	3083900000	1839000000	1764300000	876600000	1078500000	1138700000	3.51802	1.70515	1.5494	0.865884	1.10052	0.484689	3317700000	2094800000	1239400000	1914100000	234260000	547210000	689590000	8.9422	2.26494	2.77571	1.58378	0.815988	0.253287	759200000	849350000	1330700000	475550000	747130000	737750000	625580000	1.13682
Zinc finger CCCH domain-containing protein 7A	ZC3H7A		36784000	175550000	25189000	0	865460000	887390000	995240000	0.20284	0.0283855	0	0.209536	∞	0.13994	69794000	322040000	191690000	0	876600000	1078500000	1138700000	0.367374	0.177738	0	0.216725	∞	0.483806	12121000	0	146860000	11627000	234260000	547210000	689590000	0	0.26838	0.0168607	∞	15.9174	∞	36013000	59876000	57837000	48693000	747130000	737750000	625580000	0.0801413
Alpha-2-macroglobulin	A2M		0	0	0	0	865460000	887390000	995240000	0	0	0	0	0	0	0	0	0	0	876600000	1078500000	1138700000	0	0	0	0	0	0	0	0	223970000	0	234260000	547210000	689590000	0	0.409294	0	0	∞	∞	0	0	0	0	747130000	737750000	625580000	0
Actin, cytoplasmic 1;Actin, cytoplasmic 1, N-terminally processed	ACTB		78215000	716950000	81239000	468840000	865460000	887390000	995240000	0.828403	0.0915482	0.471082	0.109094	0.194336	0.110512	101620000	342910000	160240000	364840000	876600000	1078500000	1138700000	0.391182	0.148577	0.3204	0.296346	0.463722	0.379815	50042000	798340000	36366000	23945000	234260000	547210000	689590000	3.40792	0.0664571	0.0347235	0.0626826	1.91389	0.0195008	273780000	370920000	70859000	333740000	747130000	737750000	625580000	0.49646
Beta-actin-like protein 2	ACTBL2		0	0	0	0	865460000	887390000	995240000	0	0	0	0	0	0	0	257110000	0	0	876600000	1078500000	1138700000	0.293304	0	0	0	0	0	0	50177000	0	65300000	234260000	547210000	689590000	0.214194	0	0.0946939	0	0	0	0	0	0	0	747130000	737750000	625580000	0
Alpha-actinin-1	ACTN1		0	0	0	4892900	865460000	887390000	995240000	0	0	0.0049163	0	0	0	0	11091000	26465000	7215700	876600000	1078500000	1138700000	0.0126523	0.0245387	0.00633679	0	3.87242	1.93947	47505000	206970000	20905000	41620000	234260000	547210000	689590000	0.883506	0.0382029	0.0603547	0.229526	0.632973	0.0432401	7547400	0	0	814970	747130000	737750000	625580000	0
Alpha-actinin-4	ACTN4		26209000	160820000	0	77123000	865460000	887390000	995240000	0.18582	0	0.0774919	0.162971	0	0	46763000	117670000	108870000	55129000	876600000	1078500000	1138700000	0.134235	0.100946	0.048414	0.397408	2.08505	0.75201	739590000	1145700000	270610000	616240000	234260000	547210000	689590000	4.89072	0.494527	0.893632	0.645535	0.553389	0.101115	69868000	49239000	65471000	39294000	747130000	737750000	625580000	0.0659042
Actin-related protein 3	ACTR3		261830000	2280100000	640560000	704930000	865460000	887390000	995240000	2.63455	0.721847	0.708302	0.114833	1.01912	0.273992	660270000	1008500000	630540000	779470000	876600000	1078500000	1138700000	1.15047	0.584645	0.684526	0.654705	0.854088	0.508181	1302200000	1550500000	276120000	711840000	234260000	547210000	689590000	6.61871	0.504596	1.03227	0.839858	0.488824	0.0762378	959150000	896960000	990810000	1101600000	747130000	737750000	625580000	1.20054
Neuroblast differentiation-associated protein AHNAK	AHNAK		127120000	258950000	34168000	33946000	865460000	887390000	995240000	0.299205	0.0385039	0.0341084	0.490906	1.12887	0.128687	581770000	240600000	243670000	96767000	876600000	1078500000	1138700000	0.27447	0.225934	0.0849802	2.418	2.65867	0.823167	318480000	85697000	135480000	57880000	234260000	547210000	689590000	0.36582	0.247583	0.0839339	3.71635	2.94974	0.67679	286780000	147920000	282390000	210520000	747130000	737750000	625580000	0.197984
Aldo-keto reductase family 1 member B10	AKR1B10		19735000	87443000	23753000	28548000	865460000	887390000	995240000	0.101036	0.0267673	0.0286845	0.22569	0.93316	0.264927	49989000	90407000	95617000	0	876600000	1078500000	1138700000	0.103134	0.0886574	0	0.552933	∞	0.859636	159080000	0	9624600	0	234260000	547210000	689590000	0	0.0175885	0	∞	∞	∞	13358000	3215700	41012000	31217000	747130000	737750000	625580000	0.00430407
Aldo-keto reductase family 1 member B15	AKR1B15		85300000	231290000	48228000	73199000	865460000	887390000	995240000	0.267245	0.0543481	0.0735491	0.368801	0.738937	0.203364	186570000	54069000	262790000	146950000	876600000	1078500000	1138700000	0.0616804	0.243662	0.129051	3.45059	1.88811	3.95041	226300000	78167000	77299000	87172000	234260000	547210000	689590000	0.333676	0.14126	0.126411	2.89508	1.11746	0.423345	87503000	41165000	129680000	87806000	747130000	737750000	625580000	0.0550975
Fructose-bisphosphate aldolase A	ALDOA		38288000	39486000	16421000	0	865460000	887390000	995240000	0.0456243	0.0185048	0	0.96966	∞	0.405592	136000000	148270000	198640000	23164000	876600000	1078500000	1138700000	0.169142	0.184182	0.0203425	0.917246	9.05404	1.08892	153000000	26127000	33018000	0	234260000	547210000	689590000	0.11153	0.0603388	0	5.85601	∞	0.54101	28425000	12949000	37018000	28373000	747130000	737750000	625580000	0.0173317
Fructose-bisphosphate aldolase C	ALDOC		0	0	0	0	865460000	887390000	995240000	0	0	0	0	0	0	25172000	0	0	0	876600000	1078500000	1138700000	0	0	0	∞	0	0	0	0	0	0	234260000	547210000	689590000	0	0	0	0	0	0	11478000	5940000	9533600	7405800	747130000	737750000	625580000	0.00795042
THO complex subunit 4	ALYREF		0	0	0	0	865460000	887390000	995240000	0	0	0	0	0	0	0	0	0	0	876600000	1078500000	1138700000	0	0	0	0	0	0	0	0	0	0	234260000	547210000	689590000	0	0	0	0	0	0	0	2228800	0	0	747130000	737750000	625580000	0.00298315
Ankyrin repeat and FYVE domain-containing protein 1	ANKFY1		0	0	0	0	865460000	887390000	995240000	0	0	0	0	0	0	0	11840000	0	0	876600000	1078500000	1138700000	0.0135067	0	0	0	0	0	0	41997000	0	0	234260000	547210000	689590000	0.179275	0	0	0	0	0	0	0	0	0	747130000	737750000	625580000	0
Annexin A2;Putative annexin A2-like protein	ANXA2;ANXA2P2		414130000	1699500000	664100000	349290000	865460000	887390000	995240000	1.9637	0.748374	0.350961	0.243678	2.13236	0.381105	1583700000	1363700000	1495400000	811750000	876600000	1078500000	1138700000	1.55567	1.38656	0.712874	1.16133	1.94502	0.891292	1594400000	813570000	381310000	441390000	234260000	547210000	689590000	3.47294	0.696826	0.640076	1.95976	1.08866	0.200645	456880000	317140000	573940000	446540000	747130000	737750000	625580000	0.424478
Annexin A5	ANXA5		0	0	0	0	865460000	887390000	995240000	0	0	0	0	0	0	26889000	0	23625000	0	876600000	1078500000	1138700000	0	0.0219054	0	∞	∞	∞	0	0	0	0	234260000	547210000	689590000	0	0	0	0	0	0	6127200	1250400	4580900	2295900	747130000	737750000	625580000	0.0016736
ADP-ribosylation factor 5;ADP-ribosylation factor 1;ADP-ribosylation factor 3	ARF5;ARF1;ARF3		0	0	0	0	865460000	887390000	995240000	0	0	0	0	0	0	0	0	0	0	876600000	1078500000	1138700000	0	0	0	0	0	0	0	0	0	0	234260000	547210000	689590000	0	0	0	0	0	0	4626800	0	3508600	0	747130000	737750000	625580000	0
Brefeldin A-inhibited guanine nucleotide-exchange protein 2	ARFGEF2		0	0	0	0	865460000	887390000	995240000	0	0	0	0	0	0	0	0	0	0	876600000	1078500000	1138700000	0	0	0	0	0	0	0	0	0	0	234260000	547210000	689590000	0	0	0	0	0	0	0	0	0	0	747130000	737750000	625580000	0
Rho GDP-dissociation inhibitor 1	ARHGDIA		0	0	0	0	865460000	887390000	995240000	0	0	0	0	0	0	12137000	0	0	0	876600000	1078500000	1138700000	0	0	0	∞	0	0	0	0	0	0	234260000	547210000	689590000	0	0	0	0	0	0	18794000	0	13018000	8626600	747130000	737750000	625580000	0
Rho guanine nucleotide exchange factor 10	ARHGEF10		0	0	5691800	4823800	865460000	887390000	995240000	0	0.00641409	0.00484687	0	1.32335	∞	0	9777700	0	0	876600000	1078500000	1138700000	0.0111541	0	0	0	0	0	0	0	0	2650000	234260000	547210000	689590000	0	0	0.00384286	0	0	0	0	0	0	0	747130000	737750000	625580000	0
Actin-related protein 2/3 complex subunit 1B	ARPC1B		30515000	752930000	370290000	302210000	865460000	887390000	995240000	0.869977	0.41728	0.303655	0.0405283	1.37419	0.479645	216950000	395230000	360510000	172190000	876600000	1078500000	1138700000	0.450867	0.33427	0.151216	0.548921	2.21054	0.741393	918930000	183830000	147210000	235680000	234260000	547210000	689590000	0.784726	0.269019	0.341768	4.9988	0.787139	0.342819	160230000	158950000	143020000	174180000	747130000	737750000	625580000	0.212747
ATP synthase subunit alpha, mitochondrial	ATP5A1		59432000	127710000	38909000	51234000	865460000	887390000	995240000	0.147563	0.0438466	0.051479	0.465367	0.851736	0.297138	124690000	138470000	155370000	59821000	876600000	1078500000	1138700000	0.157963	0.144061	0.0525345	0.900484	2.74222	0.911996	131310000	57178000	31843000	97751000	234260000	547210000	689590000	0.244079	0.0581916	0.141752	2.29651	0.410516	0.238413	40881000	15536000	58799000	40561000	747130000	737750000	625580000	0.0207942
ATP synthase subunit beta, mitochondrial	ATP5B		9532300	105410000	0	29360000	865460000	887390000	995240000	0.121797	0	0.0295004	0.0904307	0	0	54376000	74723000	99485000	47920000	876600000	1078500000	1138700000	0.0852418	0.0922439	0.0420831	0.727701	2.19195	1.08214	44095000	38328000	0	26432000	234260000	547210000	689590000	0.163613	0	0.03833	1.15046	0	0	77009000	31435000	68357000	55352000	747130000	737750000	625580000	0.0420743
BAG family molecular chaperone regulator 2	BAG2		0	0	0	0	865460000	887390000	995240000	0	0	0	0	0	0	0	0	0	0	876600000	1078500000	1138700000	0	0	0	0	0	0	0	0	0	0	234260000	547210000	689590000	0	0	0	0	0	0	4060400	3088400	2528100	2251700	747130000	737750000	625580000	0.00413368
Barrier-to-autointegration factor;Barrier-to-autointegration factor, N-terminally processed	BANF1		0	0	0	0	865460000	887390000	995240000	0	0	0	0	0	0	0	0	0	0	876600000	1078500000	1138700000	0	0	0	0	0	0	0	0	0	0	234260000	547210000	689590000	0	0	0	0	0	0	30623000	0	0	0	747130000	737750000	625580000	0
Complement C4-B;Complement C4 beta chain;Complement C4-B alpha chain;C4a anaphylatoxin;C4b-B;C4d-B;Complement C4 gamma chain;Complement C4-A;Complement C4 beta chain;Complement C4-A alpha chain;C4a anaphylatoxin;C4b-A;C4d-A;Complement C4 gamma chain	C4B;C4A		0	0	0	0	865460000	887390000	995240000	0	0	0	0	0	0	0	0	0	0	876600000	1078500000	1138700000	0	0	0	0	0	0	11197000	0	96596000	0	234260000	547210000	689590000	0	0.176525	0	∞	∞	∞	0	0	0	0	747130000	737750000	625580000	0
Calmodulin-like protein 5	CALML5		0	0	0	0	865460000	887390000	995240000	0	0	0	0	0	0	0	0	0	0	876600000	1078500000	1138700000	0	0	0	0	0	0	0	0	0	0	234260000	547210000	689590000	0	0	0	0	0	0	0	0	0	0	747130000	737750000	625580000	0
Calreticulin	CALR		0	0	0	0	865460000	887390000	995240000	0	0	0	0	0	0	0	2180000	0	0	876600000	1078500000	1138700000	0.00248688	0	0	0	0	0	0	0	0	0	234260000	547210000	689590000	0	0	0	0	0	0	0	0	4586300	0	747130000	737750000	625580000	0
F-actin-capping protein subunit beta	CAPZB		0	0	0	0	865460000	887390000	995240000	0	0	0	0	0	0	17034000	0	0	0	876600000	1078500000	1138700000	0	0	0	∞	0	0	0	0	0	0	234260000	547210000	689590000	0	0	0	0	0	0	16043000	6648400	1997100	0	747130000	737750000	625580000	0.00889859
Calcium-regulated heat stable protein 1	CARHSP1		0	25500000	0	7671000	865460000	887390000	995240000	0.0294641	0	0.00770769	0	0	0	31272000	20336000	17595000	12269000	876600000	1078500000	1138700000	0.0231987	0.0163143	0.0107746	1.53777	1.51415	0.703242	0	15223000	0	10840000	234260000	547210000	689590000	0.0649834	0	0.0157195	0	0	0	0	0	0	0	747130000	737750000	625580000	0
Caveolin-1	CAV1		14274000	0	0	0	865460000	887390000	995240000	0	0	0	∞	0	0	0	0	0	0	876600000	1078500000	1138700000	0	0	0	0	0	0	0	0	0	0	234260000	547210000	689590000	0	0	0	0	0	0	8317400	0	0	0	747130000	737750000	625580000	0
Cyclin-dependent-like kinase 5;Cyclin-dependent kinase 1;Cyclin-dependent kinase 2;Cyclin-dependent kinase 4;Cyclin-dependent kinase 3;Cyclin-dependent kinase 6;Cyclin-dependent kinase 9;Cyclin-dependent kinase 15;Cyclin-dependent kinase 14;Cyclin-dependent kinase 18;Cyclin-dependent kinase 16;Cyclin-dependent kinase 17;Cyclin-dependent kinase 12;Cyclin-dependent kinase 13	CDK5;CDK1;CDK2;CDK4;CDK3;CDK6;CDK9;CDK15;CDK14;CDK18;CDK16;CDK17;CDK12;CDK13		8160700	15920000	0	0	865460000	887390000	995240000	0.0183948	0	0	0.512607	0	0	27026000	0	0	5457100	876600000	1078500000	1138700000	0	0	0.00479239	∞	0	0	0	0	0	9417700	234260000	547210000	689590000	0	0	0.013657	0	0	0	2972800	0	0	1632700	747130000	737750000	625580000	0
Cofilin-1	CFL1		158780000	381330000	63941000	94358000	865460000	887390000	995240000	0.44061	0.0720551	0.0948093	0.416385	0.760001	0.163535	564270000	202970000	162610000	135690000	876600000	1078500000	1138700000	0.231542	0.150774	0.119162	2.78007	1.26529	0.651173	374010000	166990000	38943000	79160000	234260000	547210000	689590000	0.71284	0.0711665	0.114793	2.23971	0.619956	0.0998351	145300000	49534000	89191000	91065000	747130000	737750000	625580000	0.066299
Chloride intracellular channel protein 1	CLIC1		0	0	0	0	865460000	887390000	995240000	0	0	0	0	0	0	17284000	4830000	8662200	0	876600000	1078500000	1138700000	0.00550992	0.00803171	0	3.57847	∞	1.45768	20699000	0	0	0	234260000	547210000	689590000	0	0	0	∞	0	0	0	0	0	0	747130000	737750000	625580000	0
Beta/gamma crystallin domain-containing protein 3	CRYBG3		160520000	322270000	0	133260000	865460000	887390000	995240000	0.372368	0	0.133897	0.498092	0	0	491810000	610720000	260230000	153800000	876600000	1078500000	1138700000	0.696692	0.241289	0.135066	0.805295	1.78645	0.346335	417820000	0	8154000	51612000	234260000	547210000	689590000	0	0.014901	0.0748445	∞	0.199093	∞	193770000	62602000	218200000	150170000	747130000	737750000	625580000	0.08379
Exportin-2	CSE1L		0	0	0	0	865460000	887390000	995240000	0	0	0	0	0	0	0	0	0	0	876600000	1078500000	1138700000	0	0	0	0	0	0	0	0	0	0	234260000	547210000	689590000	0	0	0	0	0	0	3662200	0	2768600	0	747130000	737750000	625580000	0
Src substrate cortactin	CTTN		0	13903000	0	15375000	865460000	887390000	995240000	0.0160643	0	0.0154485	0	0	0	0	16873000	29669000	7984400	876600000	1078500000	1138700000	0.0192482	0.0275095	0.00701186	0	3.92328	1.4292	0	4671800	0	14382000	234260000	547210000	689590000	0.0199428	0	0.0208559	0	0	0	19083000	15131000	22629000	15290000	747130000	737750000	625580000	0.0202522
Cullin-1	CUL1		0	4376700	0	0	865460000	887390000	995240000	0.00505708	0	0	0	0	0	0	0	0	6278300	876600000	1078500000	1138700000	0	0	0.00551357	0	0	0	0	0	0	0	234260000	547210000	689590000	0	0	0	0	0	0	0	0	0	0	747130000	737750000	625580000	0
Drebrin	DBN1		0	326990000	68932000	53989000	865460000	887390000	995240000	0.377822	0.0776795	0.0542472	0	1.43195	0.205598	0	45660000	60722000	16318000	876600000	1078500000	1138700000	0.0520876	0.0563023	0.0143304	0	3.92888	1.08091	0	508560000	41734000	387870000	234260000	547210000	689590000	2.17092	0.0762669	0.562465	0	0.135594	0.0351311	99909000	13544000	14945000	4924600	747130000	737750000	625580000	0.018128
DNA damage-binding protein 1	DDB1		0	0	0	0	865460000	887390000	995240000	0	0	0	0	0	0	7853900	0	4697000	0	876600000	1078500000	1138700000	0	0.00435512	0	∞	∞	∞	0	0	0	0	234260000	547210000	689590000	0	0	0	0	0	0	12236000	9690300	4483200	4819800	747130000	737750000	625580000	0.01297
Putative pre-mRNA-splicing factor ATP-dependent RNA helicase DHX15	DHX15		0	0	0	0	865460000	887390000	995240000	0	0	0	0	0	0	0	0	0	0	876600000	1078500000	1138700000	0	0	0	0	0	0	0	0	0	0	234260000	547210000	689590000	0	0	0	0	0	0	0	0	0	0	747130000	737750000	625580000	0
Protein diaphanous homolog 3	DIAPH3		75667000	253540000	127010000	0	865460000	887390000	995240000	0.292954	0.143128	0	0.298442	∞	0.488567	0	0	54352000	12603000	876600000	1078500000	1138700000	0	0.0503959	0.0110679	0	4.55335	∞	0	0	0	104350000	234260000	547210000	689590000	0	0	0.151322	0	0	0	123150000	86670000	200270000	173810000	747130000	737750000	625580000	0.116004
DnaJ homolog subfamily A member 1	DNAJA1		0	0	13030000	16983000	865460000	887390000	995240000	0	0.0146835	0.0170642	0	0.860485	∞	8150000	0	9431400	0	876600000	1078500000	1138700000	0	0.00874492	0	∞	∞	∞	0	9278600	0	8024800	234260000	547210000	689590000	0.0396081	0	0.0116371	0	0	0	6128900	10262000	8727200	0	747130000	737750000	625580000	0.0137352
DnaJ homolog subfamily B member 6;DnaJ homolog subfamily B member 3;DnaJ homolog subfamily B member 8;DnaJ homolog subfamily B member 2	DNAJB6;DNAJB3;DNAJB8;DNAJB2		0	0	0	0	865460000	887390000	995240000	0	0	0	0	0	0	0	0	0	0	876600000	1078500000	1138700000	0	0	0	0	0	0	0	0	0	0	234260000	547210000	689590000	0	0	0	0	0	0	0	2666800	8547400	6791800	747130000	737750000	625580000	0.00356939
Dedicator of cytokinesis protein 4	DOCK4		5072800	30739000	0	25272000	865460000	887390000	995240000	0.0355175	0	0.0253929	0.165028	0	0	102350000	31654000	0	25999000	876600000	1078500000	1138700000	0.03611	0	0.0228322	3.2334	0	0	38554000	28953000	0	10518000	234260000	547210000	689590000	0.123593	0	0.0152525	1.33161	0	0	10334000	10377000	21455000	13350000	747130000	737750000	625580000	0.0138891
Dolichol-phosphate mannosyltransferase subunit 1	DPM1		155750000	122060000	0	0	865460000	887390000	995240000	0.141035	0	0	1.27601	0	0	228350000	116120000	60565000	0	876600000	1078500000	1138700000	0.132466	0.0561567	0	1.9665	∞	0.423932	352780000	0	30731000	0	234260000	547210000	689590000	0	0.0561594	0	∞	∞	∞	15012000	36198000	65401000	35481000	747130000	737750000	625580000	0.0484494
Putative elongation factor 1-alpha-like 3;Elongation factor 1-alpha 1;Elongation factor 1-alpha 2	EEF1A1P5;EEF1A1;EEF1A2		375670000	530630000	287510000	267860000	865460000	887390000	995240000	0.613119	0.323995	0.269141	0.70797	1.20381	0.528437	1413200000	1560600000	2055700000	353270000	876600000	1078500000	1138700000	1.78029	1.90607	0.31024	0.905549	6.14387	1.07065	581220000	93038000	1151200000	135360000	234260000	547210000	689590000	0.397157	2.10376	0.196291	6.24712	10.7176	5.29706	271760000	154620000	241310000	267930000	747130000	737750000	625580000	0.206952
Elongation factor 1-delta	EEF1D		0	0	0	2928200	865460000	887390000	995240000	0	0	0.0029422	0	0	0	0	0	9114300	7603600	876600000	1078500000	1138700000	0	0.0084509	0.00667744	0	1.26559	∞	0	0	0	0	234260000	547210000	689590000	0	0	0	0	0	0	0	0	0	0	747130000	737750000	625580000	0
Elongation factor 1-gamma	EEF1G		4184500	18550000	21116000	9799800	865460000	887390000	995240000	0.0214337	0.0237956	0.00984667	0.22558	2.41662	1.1102	15670000	34455000	22075000	17197000	876600000	1078500000	1138700000	0.0393053	0.0204682	0.0151023	0.454796	1.35531	0.520751	44060000	16064000	0	9476200	234260000	547210000	689590000	0.0685734	0	0.0137418	2.74278	0	0	19689000	5837100	28462000	17185000	747130000	737750000	625580000	0.0078127
Elongation factor 2	EEF2		0	72969000	36192000	21004000	865460000	887390000	995240000	0.0843124	0.0407848	0.0211045	0	1.93252	0.483734	257760000	61690000	79858000	56419000	876600000	1078500000	1138700000	0.0703742	0.0740454	0.0495469	4.17831	1.49445	1.05217	37705000	11329000	0	5271600	234260000	547210000	689590000	0.0483608	0	0.00764454	3.32818	0	0	105930000	41407000	59655000	51461000	747130000	737750000	625580000	0.0554214
Eukaryotic translation initiation factor 2 subunit 2	EIF2S2		0	0	0	0	865460000	887390000	995240000	0	0	0	0	0	0	0	0	0	0	876600000	1078500000	1138700000	0	0	0	0	0	0	0	0	0	0	234260000	547210000	689590000	0	0	0	0	0	0	0	4753400	10266000	6803000	747130000	737750000	625580000	0.00636221
Eukaryotic translation initiation factor 3 subunit F	EIF3F		0	7088600	0	3750100	865460000	887390000	995240000	0.00819056	0	0.00376804	0	0	0	0	0	5720400	3912200	876600000	1078500000	1138700000	0	0.00530403	0.00343567	0	1.54381	∞	22311000	7026000	0	0	234260000	547210000	689590000	0.0299923	0	0	3.17549	0	0	8748000	4379400	3695800	5949300	747130000	737750000	625580000	0.00586163
Eukaryotic initiation factor 4A-I;Eukaryotic initiation factor 4A-II	EIF4A1;EIF4A2		0	0	0	0	865460000	887390000	995240000	0	0	0	0	0	0	0	17463000	0	0	876600000	1078500000	1138700000	0.0199213	0	0	0	0	0	0	0	0	0	234260000	547210000	689590000	0	0	0	0	0	0	12191000	0	2741200	3109000	747130000	737750000	625580000	0
Eukaryotic translation initiation factor 5A-1;Eukaryotic translation initiation factor 5A-2;Eukaryotic translation initiation factor 5A-1-like	EIF5A;EIF5A2;EIF5AL1		0	0	0	0	865460000	887390000	995240000	0	0	0	0	0	0	52095000	0	0	0	876600000	1078500000	1138700000	0	0	0	∞	0	0	25513000	13895000	0	8966400	234260000	547210000	689590000	0.0593144	0	0.0130025	1.83613	0	0	8070900	2991500	11464000	4161100	747130000	737750000	625580000	0.00400399
Alpha-enolase	ENO1		25467000	136960000	24548000	26958000	865460000	887390000	995240000	0.158251	0.0276631	0.0270869	0.185945	1.02127	0.174805	361320000	130730000	195960000	33414000	876600000	1078500000	1138700000	0.149133	0.181697	0.029344	2.76386	6.19196	1.21835	90156000	25416000	34375000	35269000	234260000	547210000	689590000	0.108495	0.0628187	0.0511449	3.54721	1.22825	0.579001	238000000	64041000	140300000	140880000	747130000	737750000	625580000	0.085716
Gamma-enolase	ENO2		4641500	5994100	0	0	865460000	887390000	995240000	0.00692591	0	0	0.774345	0	0	25151000	0	23247000	15902000	876600000	1078500000	1138700000	0	0.0215549	0.013965	∞	1.54349	∞	21506000	0	0	0	234260000	547210000	689590000	0	0	0	∞	0	0	41979000	10193000	27891000	0	747130000	737750000	625580000	0.0136429
Beta-enolase	ENO3		0	0	0	0	865460000	887390000	995240000	0	0	0	0	0	0	0	0	0	0	876600000	1078500000	1138700000	0	0	0	0	0	0	0	0	0	0	234260000	547210000	689590000	0	0	0	0	0	0	14566000	2425000	8370700	4029000	747130000	737750000	625580000	0.00324575
Electron transfer flavoprotein subunit alpha, mitochondrial	ETFA		0	0	0	0	865460000	887390000	995240000	0	0	0	0	0	0	0	0	0	0	876600000	1078500000	1138700000	0	0	0	0	0	0	0	0	0	0	234260000	547210000	689590000	0	0	0	0	0	0	0	0	0	0	747130000	737750000	625580000	0
FERM, RhoGEF and pleckstrin domain-containing protein 1	FARP1		0	0	0	0	865460000	887390000	995240000	0	0	0	0	0	0	20310000	0	0	0	876600000	1078500000	1138700000	0	0	0	∞	0	0	0	0	0	0	234260000	547210000	689590000	0	0	0	0	0	0	0	0	0	0	747130000	737750000	625580000	0
Filamin-A	FLNA		30402000	28825000	0	17470000	865460000	887390000	995240000	0.033306	0	0.0175536	1.05471	0	0	103270000	52286000	8335300	23170000	876600000	1078500000	1138700000	0.0596464	0.0077286	0.0203478	1.9751	0.379826	0.129574	14238000	67683000	12188000	19325000	234260000	547210000	689590000	0.288923	0.022273	0.0280239	0.210363	0.794785	0.0770898	7922000	0	5685100	1749300	747130000	737750000	625580000	0
Fascin	FSCN1		0	11786000	0	0	865460000	887390000	995240000	0.0136182	0	0	0	0	0	18754000	25398000	0	0	876600000	1078500000	1138700000	0.0289733	0	0	0.738405	0	0	0	0	0	0	234260000	547210000	689590000	0	0	0	0	0	0	0	2344200	6755200	5911900	747130000	737750000	625580000	0.00313761
Ras GTPase-activating protein-binding protein 1	G3BP1		0	0	0	0	865460000	887390000	995240000	0	0	0	0	0	0	0	0	0	0	876600000	1078500000	1138700000	0	0	0	0	0	0	0	0	0	0	234260000	547210000	689590000	0	0	0	0	0	0	2987700	2108700	0	1300900	747130000	737750000	625580000	0.0028224
Glyceraldehyde-3-phosphate dehydrogenase	GAPDH		134880000	106550000	15615000	14680000	865460000	887390000	995240000	0.123114	0.0175965	0.0147502	1.26588	1.19297	0.142929	262290000	74819000	145120000	67760000	876600000	1078500000	1138700000	0.0853514	0.134557	0.0595065	3.50566	2.26122	1.57651	16021000	0	0	0	234260000	547210000	689590000	0	0	0	∞	0	0	37944000	23613000	53372000	62779000	747130000	737750000	625580000	0.0316049
H/ACA ribonucleoprotein complex subunit 1	GAR1		39769000	29880000	18466000	15281000	865460000	887390000	995240000	0.034525	0.0208093	0.0153541	1.33096	1.3553	0.602733	72156000	0	0	17194000	876600000	1078500000	1138700000	0	0	0.0150997	∞	0	0	0	17445000	0	11568000	234260000	547210000	689590000	0.0744685	0	0.0167752	0	0	0	7984300	8539300	4588600	5430200	747130000	737750000	625580000	0.0114295
Gem-associated protein 2	GEMIN2		18813000	0	9359500	4563300	865460000	887390000	995240000	0	0.0105472	0.00458513	∞	2.30031	∞	23933000	0	17447000	0	876600000	1078500000	1138700000	0	0.0161771	0	∞	∞	∞	0	0	0	0	234260000	547210000	689590000	0	0	0	0	0	0	0	0	0	0	747130000	737750000	625580000	0
Putative oxidoreductase GLYR1	GLYR1		0	0	0	14985000	865460000	887390000	995240000	0	0	0.0150567	0	0	0	0	26311000	0	14357000	876600000	1078500000	1138700000	0.0300148	0	0.0126082	0	0	0	0	23211000	0	14026000	234260000	547210000	689590000	0.0990822	0	0.0203396	0	0	0	1104500	0	1948400	1703300	747130000	737750000	625580000	0
Glutathione S-transferase P	GSTP1		0	15950000	10893000	0	865460000	887390000	995240000	0.0184295	0.0122753	0	0	∞	0.666069	0	30776000	0	0	876600000	1078500000	1138700000	0.0351084	0	0	0	0	0	0	0	1444200	0	234260000	547210000	689590000	0	0.00263921	0	0	∞	∞	2904200	4227400	9893500	8946200	747130000	737750000	625580000	0.00565819
Glycogen [starch] synthase, muscle	GYS1		30890000	6239300	0	0	865460000	887390000	995240000	0.00720923	0	0	4.95088	0	0	158730000	9019000	0	0	876600000	1078500000	1138700000	0.0102886	0	0	17.5995	0	0	15584000	0	0	0	234260000	547210000	689590000	0	0	0	∞	0	0	19268000	0	0	26121000	747130000	737750000	625580000	0
3-hydroxyanthranilate 3,4-dioxygenase	HAAO		0	0	145800000	0	865460000	887390000	995240000	0	0.164302	0	0	∞	∞	542370000	544660000	205820000	0	876600000	1078500000	1138700000	0.621332	0.190839	0	0.995796	∞	0.307145	0	276400000	650120000	397460000	234260000	547210000	689590000	1.17989	1.18806	0.576371	0	2.06128	1.00693	165950000	25784000	26805000	24351000	747130000	737750000	625580000	0.0345107
Histone H2A type 1-J;Histone H2A type 1-H;Histone H2A.J;Histone H2A type 1-C;Histone H2A type 3;Histone H2A type 1-D;Histone H2A type 1;Histone H2A type 1-B/E;Histone H2A type 2-B;Histone H2AX	HIST1H2AJ;HIST1H2AH;H2AFJ;HIST1H2AC;HIST3H2A;HIST1H2AD;HIST1H2AG;HIST1H2AB;HIST2H2AB;H2AFX		0	0	0	0	865460000	887390000	995240000	0	0	0	0	0	0	0	0	0	0	876600000	1078500000	1138700000	0	0	0	0	0	0	0	0	0	0	234260000	547210000	689590000	0	0	0	0	0	0	0	0	0	0	747130000	737750000	625580000	0
Heterogeneous nuclear ribonucleoprotein A3	HNRNPA3		0	0	0	0	865460000	887390000	995240000	0	0	0	0	0	0	0	0	0	0	876600000	1078500000	1138700000	0	0	0	0	0	0	8680500	0	0	0	234260000	547210000	689590000	0	0	0	∞	0	0	6842200	3701900	6946500	5650200	747130000	737750000	625580000	0.00495483
Heterogeneous nuclear ribonucleoprotein K	HNRNPK		100360000	130800000	19357000	101010000	865460000	887390000	995240000	0.151134	0.0218134	0.101493	0.767278	0.214925	0.144332	195920000	113360000	52104000	97740000	876600000	1078500000	1138700000	0.129318	0.0483115	0.0858347	1.7283	0.562844	0.373588	133580000	115560000	44207000	104330000	234260000	547210000	689590000	0.493298	0.0807862	0.151293	1.15594	0.533972	0.163767	130430000	106900000	115030000	87279000	747130000	737750000	625580000	0.143081
Heat shock protein HSP 90-alpha	HSP90AA1		8046000	0	13717000	0	865460000	887390000	995240000	0	0.0154577	0	∞	∞	∞	20419000	15717000	16025000	0	876600000	1078500000	1138700000	0.0179295	0.0148586	0	1.29917	∞	0.828724	23431000	0	0	0	234260000	547210000	689590000	0	0	0	∞	0	0	13883000	0	10921000	4726700	747130000	737750000	625580000	0
Heat shock protein HSP 90-beta	HSP90AB1		181760000	363660000	26043000	50318000	865460000	887390000	995240000	0.420193	0.0293479	0.0505587	0.499808	0.580472	0.0698438	604710000	284510000	212990000	100570000	876600000	1078500000	1138700000	0.324561	0.197487	0.08832	2.12544	2.23604	0.608475	317310000	78203000	57657000	33208000	234260000	547210000	689590000	0.33383	0.105365	0.0481562	4.05752	2.18799	0.315626	197210000	52409000	98066000	75630000	747130000	737750000	625580000	0.0701471
Putative heat shock protein HSP 90-beta 2	HSP90AB2P		0	0	0	0	865460000	887390000	995240000	0	0	0	0	0	0	0	0	0	0	876600000	1078500000	1138700000	0	0	0	0	0	0	0	0	0	0	234260000	547210000	689590000	0	0	0	0	0	0	0	0	0	3569300	747130000	737750000	625580000	0
78 kDa glucose-regulated protein	HSPA5		117270000	252090000	138840000	175020000	865460000	887390000	995240000	0.291279	0.156459	0.175857	0.465191	0.889693	0.537145	261130000	222420000	280440000	279500000	876600000	1078500000	1138700000	0.25373	0.260028	0.245455	1.17404	1.05937	1.02482	151910000	168690000	86156000	145870000	234260000	547210000	689590000	0.720097	0.157446	0.211531	0.900528	0.744314	0.218645	407400000	245340000	335090000	323360000	747130000	737750000	625580000	0.328377
Heat shock 70 kDa protein 6;Putative heat shock 70 kDa protein 7	HSPA6;HSPA7		89263000	147030000	105070000	35287000	865460000	887390000	995240000	0.169887	0.118403	0.0354558	0.607107	3.33947	0.696956	255760000	106100000	150340000	32548000	876600000	1078500000	1138700000	0.121036	0.139397	0.0285835	2.41056	4.87685	1.1517	192070000	0	96276000	27820000	234260000	547210000	689590000	0	0.17594	0.0403428	∞	4.36112	∞	35914000	33203000	49203000	32601000	747130000	737750000	625580000	0.0444407
Heat shock cognate 71 kDa protein	HSPA8		496360000	1041300000	435460000	493420000	865460000	887390000	995240000	1.20318	0.49072	0.49578	0.476673	0.989794	0.407854	1308800000	1061700000	798210000	662170000	876600000	1078500000	1138700000	1.21116	0.740111	0.581514	1.23274	1.27273	0.611078	885840000	512440000	237240000	406620000	234260000	547210000	689590000	2.18748	0.433545	0.589655	1.72867	0.735252	0.198193	674760000	440550000	647540000	464200000	747130000	737750000	625580000	0.589656
60 kDa heat shock protein, mitochondrial	HSPD1		20793000	33357000	14133000	10104000	865460000	887390000	995240000	0.0385425	0.0159265	0.0101523	0.623347	1.56875	0.413219	73796000	48148000	44296000	21639000	876600000	1078500000	1138700000	0.0549258	0.0410719	0.0190032	1.53269	2.16131	0.747769	19597000	22778000	0	0	234260000	547210000	689590000	0.0972338	0	0	0.860348	0	0	52588000	8021800	30397000	37916000	747130000	737750000	625580000	0.0107368
Isocitrate dehydrogenase [NADP] cytoplasmic	IDH1		0	0	0	0	865460000	887390000	995240000	0	0	0	0	0	0	0	0	0	0	876600000	1078500000	1138700000	0	0	0	0	0	0	0	0	6404300	0	234260000	547210000	689590000	0	0.0117036	0	0	∞	∞	0	0	0	0	747130000	737750000	625580000	0
Ig gamma-1 chain C region;Ig gamma-4 chain C region;Ig gamma-3 chain C region	IGHG1;IGHG4;IGHG3		0	10570000	0	0	865460000	887390000	995240000	0.0122132	0	0	0	0	0	0	0	0	0	876600000	1078500000	1138700000	0	0	0	0	0	0	0	0	154060000	0	234260000	547210000	689590000	0	0.281537	0	0	∞	∞	0	0	0	0	747130000	737750000	625580000	0
Ig kappa chain C region	IGKC		4720800	10586000	0	0	865460000	887390000	995240000	0.0122316	0	0	0.445947	0	0	0	0	0	0	876600000	1078500000	1138700000	0	0	0	0	0	0	0	12269000	17544000	0	234260000	547210000	689590000	0.0523734	0.0320608	0	0	∞	0.612158	0	0	0	0	747130000	737750000	625580000	0
Importin-5	IPO5		0	68458000	0	21289000	865460000	887390000	995240000	0.0791001	0	0.0213908	0	0	0	37008000	0	24690000	0	876600000	1078500000	1138700000	0	0.0228929	0	∞	∞	∞	73703000	0	0	22501000	234260000	547210000	689590000	0	0	0.0326295	∞	0	0	30893000	19782000	0	18974000	747130000	737750000	625580000	0.0264773
Importin-8	IPO8		0	0	0	0	865460000	887390000	995240000	0	0	0	0	0	0	0	0	0	79609000	876600000	1078500000	1138700000	0	0	0.0699122	0	0	0	0	0	0	0	234260000	547210000	689590000	0	0	0	0	0	0	6545700	8692700	2280600	3862300	747130000	737750000	625580000	0.0116348
Junction plakoglobin	JUP		0	0	0	0	865460000	887390000	995240000	0	0	0	0	0	0	0	0	0	0	876600000	1078500000	1138700000	0	0	0	0	0	0	0	0	8456200	0	234260000	547210000	689590000	0	0.0154533	0	0	∞	∞	0	0	0	0	747130000	737750000	625580000	0
Far upstream element-binding protein 2	KHSRP		0	0	0	0	865460000	887390000	995240000	0	0	0	0	0	0	0	0	0	0	876600000	1078500000	1138700000	0	0	0	0	0	0	0	0	0	0	234260000	547210000	689590000	0	0	0	0	0	0	2471100	0	3696400	3739800	747130000	737750000	625580000	0
Importin subunit beta-1	KPNB1		19462000	122120000	181240000	60655000	865460000	887390000	995240000	0.141104	0.204239	0.0609451	0.159368	3.3512	1.44744	73223000	171420000	90554000	66246000	876600000	1078500000	1138700000	0.195551	0.0839629	0.0581769	0.427156	1.44324	0.429366	158480000	138960000	53806000	35742000	234260000	547210000	689590000	0.593187	0.0983279	0.0518308	1.14047	1.89709	0.165762	67594000	65520000	68815000	44510000	747130000	737750000	625580000	0.0876956
Putative keratin-87 protein	KRT87P		0	0	0	0	865460000	887390000	995240000	0	0	0	0	0	0	0	0	0	0	876600000	1078500000	1138700000	0	0	0	0	0	0	0	0	0	0	234260000	547210000	689590000	0	0	0	0	0	0	0	0	0	0	747130000	737750000	625580000	0
L-lactate dehydrogenase A chain	LDHA		147570000	237030000	13753000	44506000	865460000	887390000	995240000	0.273877	0.0154983	0.0447189	0.622579	0.346571	0.0565883	539950000	373910000	371540000	135580000	876600000	1078500000	1138700000	0.426546	0.344497	0.119066	1.44406	2.89334	0.807644	435160000	110400000	82598000	45588000	234260000	547210000	689590000	0.471271	0.150944	0.0661088	3.94167	2.28326	0.320291	205720000	69095000	198450000	134290000	747130000	737750000	625580000	0.0924806
Galectin-1	LGALS1		24293000	0	13150000	25104000	865460000	887390000	995240000	0	0.0148187	0.0252241	∞	0.587484	∞	0	0	105830000	63350000	876600000	1078500000	1138700000	0	0.098127	0.0556336	0	1.76381	∞	16243000	29317000	27356000	42513000	234260000	547210000	689590000	0.125147	0.0499918	0.0616497	0.554047	0.810901	0.399464	36502000	17885000	40117000	38844000	747130000	737750000	625580000	0.0239383
Prelamin-A/C;Lamin-A/C	LMNA		19617000	0	0	0	865460000	887390000	995240000	0	0	0	∞	0	0	0	0	0	0	876600000	1078500000	1138700000	0	0	0	0	0	0	0	0	0	0	234260000	547210000	689590000	0	0	0	0	0	0	17004000	0	3839500	0	747130000	737750000	625580000	0
Mitogen-activated protein kinase 6;Mitogen-activated protein kinase 1;Mitogen-activated protein kinase 3;Mitogen-activated protein kinase 4	MAPK6;MAPK1;MAPK3;MAPK4		0	10082000	0	3258900	865460000	887390000	995240000	0.0116493	0	0.00327449	0	0	0	1816500	0	0	3169200	876600000	1078500000	1138700000	0	0	0.00278317	∞	0	0	0	0	0	5087600	234260000	547210000	689590000	0	0	0.00737772	0	0	0	0	0	0	257960	747130000	737750000	625580000	0
S-adenosylmethionine synthase isoform type-2	MAT2A		13672000	0	0	0	865460000	887390000	995240000	0	0	0	∞	0	0	0	0	16233000	0	876600000	1078500000	1138700000	0	0.0150515	0	0	∞	∞	41921000	0	5202200	7855300	234260000	547210000	689590000	0	0.00950677	0.0113913	∞	0.834567	∞	6200500	0	8479000	0	747130000	737750000	625580000	0
Malate dehydrogenase, mitochondrial	MDH2		0	0	0	0	865460000	887390000	995240000	0	0	0	0	0	0	0	0	0	0	876600000	1078500000	1138700000	0	0	0	0	0	0	0	0	0	0	234260000	547210000	689590000	0	0	0	0	0	0	9972700	1122000	13462000	8313100	747130000	737750000	625580000	0.00150175
MOB kinase activator 1A;MOB kinase activator 1B	MOB1A;MOB1B		0	0	0	0	865460000	887390000	995240000	0	0	0	0	0	0	0	0	0	0	876600000	1078500000	1138700000	0	0	0	0	0	0	0	0	0	0	234260000	547210000	689590000	0	0	0	0	0	0	0	0	0	0	747130000	737750000	625580000	0
Myosin phosphatase Rho-interacting protein	MPRIP		28249000	54046000	2108800	0	865460000	887390000	995240000	0.0624477	0.00237641	0	0.522684	∞	0.0380543	41022000	13046000	21914000	5642100	876600000	1078500000	1138700000	0.0148825	0.020319	0.00495486	3.14441	4.10081	1.36529	0	0	60857000	74577000	234260000	547210000	689590000	0	0.111213	0.108147	0	1.02835	∞	56635000	21626000	18997000	15927000	747130000	737750000	625580000	0.0289454
Moesin;Radixin;Ezrin	MSN;RDX;EZR		0	0	0	0	865460000	887390000	995240000	0	0	0	0	0	0	0	0	11870000	0	876600000	1078500000	1138700000	0	0.011006	0	0	∞	∞	0	0	0	0	234260000	547210000	689590000	0	0	0	0	0	0	5762300	0	4449500	4549900	747130000	737750000	625580000	0
Metastasis-associated protein MTA3;Metastasis-associated protein MTA1	MTA3;MTA1		0	0	0	0	865460000	887390000	995240000	0	0	0	0	0	0	0	0	24825000	0	876600000	1078500000	1138700000	0	0.0230181	0	0	∞	∞	0	0	0	0	234260000	547210000	689590000	0	0	0	0	0	0	0	14352000	4038400	18104000	747130000	737750000	625580000	0.0192095
Mitochondrial carrier homolog 2	MTCH2		0	0	0	0	865460000	887390000	995240000	0	0	0	0	0	0	0	0	0	0	876600000	1078500000	1138700000	0	0	0	0	0	0	0	0	0	0	234260000	547210000	689590000	0	0	0	0	0	0	17050000	5179700	9470900	6342000	747130000	737750000	625580000	0.0069328
Monofunctional C1-tetrahydrofolate synthase, mitochondrial	MTHFD1L		9602500	24579000	8082400	14380000	865460000	887390000	995240000	0.0283999	0.00910806	0.0144488	0.390679	0.630369	0.320707	37526000	19635000	13255000	9570800	876600000	1078500000	1138700000	0.022399	0.0122902	0.00840502	1.91118	1.46225	0.548694	20655000	4936800	0	0	234260000	547210000	689590000	0.021074	0	0	4.18388	0	0	0	6473200	8871000	1385200	747130000	737750000	625580000	0.00866409
Major vault protein	MVP		44414000	122180000	65176000	86335000	865460000	887390000	995240000	0.141173	0.0734468	0.0867479	0.363513	0.84667	0.52026	105130000	67902000	26852000	88804000	876600000	1078500000	1138700000	0.0774606	0.0248975	0.0779872	1.54826	0.319252	0.321422	61084000	59069000	13913000	120890000	234260000	547210000	689590000	0.252151	0.0254253	0.175307	1.03411	0.145033	0.100834	82207000	51747000	53256000	31526000	747130000	737750000	625580000	0.069261
Myosin-14	MYH14		62916000	706280000	228430000	199950000	865460000	887390000	995240000	0.816075	0.257418	0.200906	0.0890808	1.28128	0.315434	248580000	728270000	179050000	177300000	876600000	1078500000	1138700000	0.830789	0.166018	0.155704	0.341329	1.06624	0.199831	0	384570000	0	148400000	234260000	547210000	689590000	1.64164	0	0.2152	0	0	0	37667000	120020000	249820000	36727000	747130000	737750000	625580000	0.160641
Myosin-9	MYH9		8101700000	47177000000	18211000000	26087000000	865460000	887390000	995240000	54.5109	20.522	26.2118	0.17173	0.78293	0.376475	19910000000	39522000000	25569000000	25516000000	876600000	1078500000	1138700000	45.0856	23.7079	22.408	0.50377	1.05801	0.525843	23209000000	41496000000	17606000000	32003000000	234260000	547210000	689590000	177.137	32.1741	46.4087	0.559307	0.693277	0.181635	59220000000	13708000000	13790000000	12953000000	747130000	737750000	625580000	18.3475
Myosin light chain 1/3, skeletal muscle isoform;Myosin light chain 3	MYL1;MYL3		99770000	62193000	94035000	21360000	865460000	887390000	995240000	0.0718612	0.105968	0.0214622	1.6042	4.93744	1.47462	0	0	150920000	50968000	876600000	1078500000	1138700000	0	0.139935	0.0447598	0	3.12636	∞	0	3534600	0	20611000	234260000	547210000	689590000	0.0150884	0	0.0298888	0	0	0	614960000	98235000	84342000	73607000	747130000	737750000	625580000	0.131483
Myosin regulatory light chain 12A	MYL12A		27686000	0	35915000	29404000	865460000	887390000	995240000	0	0.0404726	0.0295446	∞	1.36988	∞	0	0	35877000	46371000	876600000	1078500000	1138700000	0	0.0332656	0.0407228	0	0.816881	∞	0	0	0	10108000	234260000	547210000	689590000	0	0	0.014658	0	0	0	304360000	149840000	100770000	165480000	747130000	737750000	625580000	0.200554
Unconventional myosin-Ie	MYO1E		8874100	157120000	50376000	155340000	865460000	887390000	995240000	0.181545	0.0567687	0.156083	0.0564798	0.363709	0.312698	60180000	160790000	80392000	141130000	876600000	1078500000	1138700000	0.183425	0.0745406	0.12394	0.374277	0.601427	0.406383	55737000	78801000	29058000	141650000	234260000	547210000	689590000	0.336383	0.0531021	0.205412	0.707313	0.258515	0.157862	650350000	58057000	75348000	85369000	747130000	737750000	625580000	0.0777067
Unconventional myosin-Va	MYO5A		2941700	684110000	79849000	230150000	865460000	887390000	995240000	0.790458	0.0899819	0.231251	0.00430004	0.389109	0.113835	341780000	425200000	252580000	286100000	876600000	1078500000	1138700000	0.485056	0.234196	0.251251	0.80381	0.932117	0.482822	157980000	167460000	100350000	171470000	234260000	547210000	689590000	0.714847	0.183385	0.248655	0.943389	0.737507	0.256537	310260000	160970000	158180000	176400000	747130000	737750000	625580000	0.215451
Unconventional myosin-IXb	MYO9B		8917100	59884000	18228000	3556600	865460000	887390000	995240000	0.0691933	0.0205411	0.00357361	0.148906	5.74801	0.296866	34874000	67654000	60925000	24357000	876600000	1078500000	1138700000	0.0771777	0.0564905	0.0213902	0.515476	2.64095	0.731953	0	0	0	0	234260000	547210000	689590000	0	0	0	0	0	0	0	0	1098300	0	747130000	737750000	625580000	0
Nascent polypeptide-associated complex subunit alpha;Nascent polypeptide-associated complex subunit alpha, muscle-specific form	NACA		0	11450000	0	0	865460000	887390000	995240000	0.01323	0	0	0	0	0	0	0	0	0	876600000	1078500000	1138700000	0	0	0	0	0	0	0	0	0	0	234260000	547210000	689590000	0	0	0	0	0	0	8731400	1754900	4669800	4405900	747130000	737750000	625580000	0.00234885
Nucleosome assembly protein 1-like 1	NAP1L1		14170000	0	0	0	865460000	887390000	995240000	0	0	0	∞	0	0	9239500	0	0	0	876600000	1078500000	1138700000	0	0	0	∞	0	0	0	0	0	0	234260000	547210000	689590000	0	0	0	0	0	0	25113000	8198100	20217000	10629000	747130000	737750000	625580000	0.0109728
Nucleoside diphosphate kinase A;Nucleoside diphosphate kinase B	NME1;NME2		0	13411000	0	0	865460000	887390000	995240000	0.0154958	0	0	0	0	0	0	12974000	15526000	0	876600000	1078500000	1138700000	0.0148004	0.0143959	0	0	∞	0.972673	34205000	0	0	0	234260000	547210000	689590000	0	0	0	∞	0	0	20369000	3487000	17415000	13263000	747130000	737750000	625580000	0.00466719
Non-POU domain-containing octamer-binding protein	NONO		0	0	0	11696000	865460000	887390000	995240000	0	0	0.0117519	0	0	0	23735000	0	0	13522000	876600000	1078500000	1138700000	0	0	0.0118749	∞	0	0	0	22339000	0	0	234260000	547210000	689590000	0.0953599	0	0	0	0	0	14762000	10888000	8460400	10803000	747130000	737750000	625580000	0.0145731
Nucleophosmin	NPM1		17141000	43879000	24233000	0	865460000	887390000	995240000	0.0507002	0.0273082	0	0.390642	∞	0.538621	110630000	116670000	38112000	0	876600000	1078500000	1138700000	0.133094	0.035338	0	0.94823	∞	0.265512	130520000	16030000	32758000	9331100	234260000	547210000	689590000	0.0684282	0.0598637	0.0135314	8.14223	4.42406	0.874839	33161000	23595000	17339000	23178000	747130000	737750000	625580000	0.0315808
NAD(P)H dehydrogenase [quinone] 1	NQO1		0	2825700	0	0	865460000	887390000	995240000	0.00326497	0	0	0	0	0	9116200	0	0	0	876600000	1078500000	1138700000	0	0	0	∞	0	0	0	0	0	0	234260000	547210000	689590000	0	0	0	0	0	0	0	1619400	3552000	1626800	747130000	737750000	625580000	0.00216749
Cleavage and polyadenylation specificity factor subunit 5	NUDT21		0	0	0	0	865460000	887390000	995240000	0	0	0	0	0	0	0	0	0	0	876600000	1078500000	1138700000	0	0	0	0	0	0	0	0	0	0	234260000	547210000	689590000	0	0	0	0	0	0	7275100	5947300	6446300	4830600	747130000	737750000	625580000	0.00796019
Protein odr-4 homolog	ODR4		0	0	0	0	865460000	887390000	995240000	0	0	0	0	0	0	0	0	0	0	876600000	1078500000	1138700000	0	0	0	0	0	0	0	0	0	0	234260000	547210000	689590000	0	0	0	0	0	0	1301700	0	0	3760900	747130000	737750000	625580000	0
Obg-like ATPase 1	OLA1		0	0	0	0	865460000	887390000	995240000	0	0	0	0	0	0	0	0	0	0	876600000	1078500000	1138700000	0	0	0	0	0	0	0	0	0	0	234260000	547210000	689590000	0	0	0	0	0	0	3573800	0	0	0	747130000	737750000	625580000	0
Ubiquitin thioesterase OTUB1	OTUB1		0	0	0	0	865460000	887390000	995240000	0	0	0	0	0	0	0	0	0	9182600	876600000	1078500000	1138700000	0	0	0.00806411	0	0	0	0	0	0	0	234260000	547210000	689590000	0	0	0	0	0	0	0	2292500	2921700	0	747130000	737750000	625580000	0.00306841
Protein disulfide-isomerase	P4HB		0	0	0	0	865460000	887390000	995240000	0	0	0	0	0	0	6854300	0	7978600	5293000	876600000	1078500000	1138700000	0	0.00739787	0.00464828	∞	1.59153	∞	0	0	0	0	234260000	547210000	689590000	0	0	0	0	0	0	17233000	5439900	11512000	6621800	747130000	737750000	625580000	0.00728106
Polyadenylate-binding protein 1	PABPC1		45401000	35585000	18099000	17977000	865460000	887390000	995240000	0.0411169	0.0203958	0.018063	1.27585	1.12915	0.496044	86298000	59194000	51396000	4248900	876600000	1078500000	1138700000	0.0675268	0.0476551	0.00373136	1.45788	12.7715	0.705721	53382000	0	0	16769000	234260000	547210000	689590000	0	0	0.0243173	∞	0	0	89064000	70227000	57082000	39137000	747130000	737750000	625580000	0.0939957
Poly(rC)-binding protein 1	PCBP1		22317000	72004000	0	0	865460000	887390000	995240000	0.0831974	0	0	0.309941	0	0	84826000	9456700	9174200	0	876600000	1078500000	1138700000	0.0107879	0.00850644	0	8.96994	∞	0.788515	49044000	21044000	30117000	0	234260000	547210000	689590000	0.0898318	0.0550374	0	2.33055	∞	0.612671	31330000	10496000	4998100	3505300	747130000	737750000	625580000	0.0140484
Proliferating cell nuclear antigen	PCNA		12992000	0	0	0	865460000	887390000	995240000	0	0	0	∞	0	0	0	0	0	0	876600000	1078500000	1138700000	0	0	0	0	0	0	0	0	0	0	234260000	547210000	689590000	0	0	0	0	0	0	2258500	3224000	8978800	4184300	747130000	737750000	625580000	0.00431518
Protein disulfide-isomerase A3	PDIA3		6893400	58232000	59391000	13513000	865460000	887390000	995240000	0.0672844	0.0669277	0.0135776	0.118378	4.92926	0.994698	0	51858000	53736000	16653000	876600000	1078500000	1138700000	0.0591581	0.0498248	0.0146246	0	3.40692	0.84223	0	0	0	0	234260000	547210000	689590000	0	0	0	0	0	0	0	0	8339800	5684500	747130000	737750000	625580000	0
Phosphoglycerate mutase 1	PGAM1		15434000	11579000	7259500	0	865460000	887390000	995240000	0.013379	0.00818073	0	1.33293	∞	0.61146	94462000	17270000	0	0	876600000	1078500000	1138700000	0.0197011	0	0	5.46972	0	0	10050000	0	0	0	234260000	547210000	689590000	0	0	0	∞	0	0	30071000	12234000	28683000	25057000	747130000	737750000	625580000	0.0163747
Phosphoglycerate kinase 1	PGK1		128020000	138490000	30960000	20994000	865460000	887390000	995240000	0.160019	0.0348888	0.0210944	0.924399	1.65394	0.218029	382480000	144730000	306210000	167980000	876600000	1078500000	1138700000	0.165104	0.283922	0.147519	2.64271	1.92465	1.71966	159810000	16281000	10084000	18430000	234260000	547210000	689590000	0.0694997	0.018428	0.026726	9.81574	0.689516	0.265153	158590000	28087000	136900000	80589000	747130000	737750000	625580000	0.0375932
Pyruvate kinase PKM	PKM		106390000	166490000	11525000	28592000	865460000	887390000	995240000	0.192372	0.0129875	0.0287287	0.639017	0.452074	0.0675127	327130000	219650000	289840000	108480000	876600000	1078500000	1138700000	0.25057	0.268744	0.0952665	1.48932	2.82097	1.07253	195800000	78125000	16756000	96193000	234260000	547210000	689590000	0.333497	0.0306208	0.139493	2.50624	0.219515	0.0918173	270030000	70121000	220700000	159970000	747130000	737750000	625580000	0.0938538
Phospholipase A-2-activating protein	PLAA		0	0	0	0	865460000	887390000	995240000	0	0	0	0	0	0	0	0	0	0	876600000	1078500000	1138700000	0	0	0	0	0	0	0	0	0	0	234260000	547210000	689590000	0	0	0	0	0	0	0	0	0	0	747130000	737750000	625580000	0
Plectin	PLEC		0	0	0	0	865460000	887390000	995240000	0	0	0	0	0	0	0	0	0	0	876600000	1078500000	1138700000	0	0	0	0	0	0	0	0	0	0	234260000	547210000	689590000	0	0	0	0	0	0	0	0	0	0	747130000	737750000	625580000	0
Plastin-3	PLS3		4583200	0	0	4609700	865460000	887390000	995240000	0	0	0.00463175	∞	0	0	20318000	8389600	15433000	0	876600000	1078500000	1138700000	0.00957061	0.0143097	0	2.42181	∞	1.49517	36314000	0	0	4527800	234260000	547210000	689590000	0	0	0.00656593	∞	0	0	8047000	4666200	9658500	7169000	747130000	737750000	625580000	0.0062455
Peptidyl-prolyl cis-trans isomerase A;Peptidyl-prolyl cis-trans isomerase A, N-terminally processed;Peptidyl-prolyl cis-trans isomerase A-like 4A/B/C;Peptidyl-prolyl cis-trans isomerase A-like 4D	PPIA;PPIAL4F;PPIAL4A;PPIAL4D		28479000	0	0	12741000	865460000	887390000	995240000	0	0	0.0128019	∞	0	0	0	14026000	48411000	17712000	876600000	1078500000	1138700000	0.0160005	0.0448873	0.0155546	0	2.8858	2.80538	0	0	18672000	0	234260000	547210000	689590000	0	0.0341222	0	0	∞	∞	36371000	14379000	29967000	17542000	747130000	737750000	625580000	0.0192456
Serine/threonine-protein phosphatase PP1-gamma catalytic subunit;Serine/threonine-protein phosphatase PP1-beta catalytic subunit;Serine/threonine-protein phosphatase PP1-alpha catalytic subunit	PPP1CC;PPP1CB;PPP1CA		0	0	0	0	865460000	887390000	995240000	0	0	0	0	0	0	0	0	0	0	876600000	1078500000	1138700000	0	0	0	0	0	0	0	0	0	0	234260000	547210000	689590000	0	0	0	0	0	0	7291800	6786800	8841900	3672700	747130000	737750000	625580000	0.00908383
Peroxiredoxin-5, mitochondrial	PRDX5		280190000	73610000	0	33733000	865460000	887390000	995240000	0.085053	0	0.0338943	3.80641	0	0	280480000	85796000	61769000	51773000	876600000	1078500000	1138700000	0.0978736	0.0572731	0.0454668	3.26915	1.25967	0.585174	103700000	99036000	27414000	33700000	234260000	547210000	689590000	0.422761	0.0500978	0.0488696	1.04709	1.02513	0.118501	76554000	56814000	87899000	82272000	747130000	737750000	625580000	0.076043
Protein arginine N-methyltransferase 1	PRMT1		0	0	0	0	865460000	887390000	995240000	0	0	0	0	0	0	0	0	10631000	0	876600000	1078500000	1138700000	0	0.00985721	0	0	∞	∞	0	0	0	0	234260000	547210000	689590000	0	0	0	0	0	0	8156500	0	0	0	747130000	737750000	625580000	0
Ribose-phosphate pyrophosphokinase 1;Ribose-phosphate pyrophosphokinase 3;Ribose-phosphate pyrophosphokinase 2	PRPS1;PRPS1L1;PRPS2		0	0	17602000	0	865460000	887390000	995240000	0	0.0198357	0	0	∞	∞	14365000	3616400	0	12963000	876600000	1078500000	1138700000	0.00412548	0	0.011384	3.97218	0	0	0	0	0	2731100	234260000	547210000	689590000	0	0	0.00396047	0	0	0	5057300	903600	837930	397150	747130000	737750000	625580000	0.00120943
26S protease regulatory subunit 7	PSMC2		3802500	0	0	0	865460000	887390000	995240000	0	0	0	∞	0	0	9574900	12774000	0	0	876600000	1078500000	1138700000	0.0145722	0	0	0.749562	0	0	0	12182000	0	0	234260000	547210000	689590000	0.052002	0	0	0	0	0	0	0	6937200	1116400	747130000	737750000	625580000	0
26S proteasome non-ATPase regulatory subunit 1	PSMD1		0	0	0	0	865460000	887390000	995240000	0	0	0	0	0	0	4622000	0	0	0	876600000	1078500000	1138700000	0	0	0	∞	0	0	0	0	0	0	234260000	547210000	689590000	0	0	0	0	0	0	0	0	0	0	747130000	737750000	625580000	0
26S proteasome non-ATPase regulatory subunit 11	PSMD11		0	0	0	0	865460000	887390000	995240000	0	0	0	0	0	0	0	0	0	0	876600000	1078500000	1138700000	0	0	0	0	0	0	0	0	0	0	234260000	547210000	689590000	0	0	0	0	0	0	0	0	0	0	747130000	737750000	625580000	0
26S proteasome non-ATPase regulatory subunit 13	PSMD13		0	0	0	0	865460000	887390000	995240000	0	0	0	0	0	0	0	0	0	0	876600000	1078500000	1138700000	0	0	0	0	0	0	0	0	0	0	234260000	547210000	689590000	0	0	0	0	0	0	0	0	0	0	747130000	737750000	625580000	0
26S proteasome non-ATPase regulatory subunit 6	PSMD6		0	0	0	0	865460000	887390000	995240000	0	0	0	0	0	0	0	0	7615000	0	876600000	1078500000	1138700000	0	0.00706073	0	0	∞	∞	0	0	0	0	234260000	547210000	689590000	0	0	0	0	0	0	0	0	0	0	747130000	737750000	625580000	0
Polypyrimidine tract-binding protein 1	PTBP1		6652600	0	0	12865000	865460000	887390000	995240000	0	0	0.0129265	∞	0	0	33681000	0	0	9561700	876600000	1078500000	1138700000	0	0	0.00839703	∞	0	0	0	0	0	11737000	234260000	547210000	689590000	0	0	0.0170203	0	0	0	8792100	7295300	16959000	10422000	747130000	737750000	625580000	0.00976443
Ras-related protein Rab-7a	RAB7A		0	0	0	0	865460000	887390000	995240000	0	0	0	0	0	0	0	0	0	0	876600000	1078500000	1138700000	0	0	0	0	0	0	0	0	0	0	234260000	547210000	689590000	0	0	0	0	0	0	0	0	0	0	747130000	737750000	625580000	0
GTP-binding nuclear protein Ran	RAN		0	0	0	0	865460000	887390000	995240000	0	0	0	0	0	0	12856000	11816000	6205000	6393200	876600000	1078500000	1138700000	0.0134794	0.00575336	0.00561447	1.08802	1.02474	0.426828	0	1686700	0	0	234260000	547210000	689590000	0.00720012	0	0	0	0	0	2235400	0	0	0	747130000	737750000	625580000	0
Reticulocalbin-2	RCN2		44336000	60424000	46314000	7194300	865460000	887390000	995240000	0.0698172	0.0521913	0.00722871	0.733748	7.22	0.747541	28379000	27400000	25054000	6180400	876600000	1078500000	1138700000	0.0312571	0.0232304	0.00542759	1.03573	4.28006	0.743204	0	0	11647000	6516700	234260000	547210000	689590000	0	0.0212843	0.00945011	0	2.25228	∞	46088000	23535000	41504000	28820000	747130000	737750000	625580000	0.0315005
REST corepressor 1;REST corepressor 3	RCOR1;RCOR3		0	0	0	4804800	865460000	887390000	995240000	0	0	0.00482778	0	0	0	0	0	9063400	4370300	876600000	1078500000	1138700000	0	0.00840371	0.00383797	0	2.18962	∞	22000000	0	0	4934700	234260000	547210000	689590000	0	0	0.00715599	∞	0	0	0	5740300	8300500	2826700	747130000	737750000	625580000	0.00768313
Serine/threonine-protein kinase RIO1	RIOK1		137850000	219270000	246780000	143830000	865460000	887390000	995240000	0.253357	0.278096	0.144518	0.628677	1.9243	1.09765	360570000	279430000	116800000	134490000	876600000	1078500000	1138700000	0.318766	0.108299	0.118108	1.29038	0.916942	0.339743	137230000	47001000	0	120420000	234260000	547210000	689590000	0.200636	0	0.174626	2.91973	0	0	98432000	84494000	84795000	72330000	747130000	737750000	625580000	0.113091
E3 ubiquitin-protein ligase RNF5	RNF5		0	0	0	0	865460000	887390000	995240000	0	0	0	0	0	0	0	0	0	0	876600000	1078500000	1138700000	0	0	0	0	0	0	0	0	0	0	234260000	547210000	689590000	0	0	0	0	0	0	0	0	0	0	747130000	737750000	625580000	0
60S ribosomal protein L22	RPL22		5256200	0	0	0	865460000	887390000	995240000	0	0	0	∞	0	0	18188000	15730000	8208100	10503000	876600000	1078500000	1138700000	0.0179443	0.00761066	0.00922368	1.15626	0.825123	0.424126	0	0	0	0	234260000	547210000	689590000	0	0	0	0	0	0	5888300	5656200	11696000	11742000	747130000	737750000	625580000	0.00757057
60S ribosomal protein L28	RPL28		0	4124300	30064000	0	865460000	887390000	995240000	0.00476544	0.0338791	0	0	∞	7.10934	0	0	23040000	0	876600000	1078500000	1138700000	0	0.021363	0	0	∞	∞	0	5002500	8453800	0	234260000	547210000	689590000	0.0213545	0.0154489	0	0	∞	0.723451	3404400	0	283010	529300	747130000	737750000	625580000	0
60S ribosomal protein L32	RPL32		0	0	0	0	865460000	887390000	995240000	0	0	0	0	0	0	0	0	3933400	0	876600000	1078500000	1138700000	0	0.0036471	0	0	∞	∞	0	0	0	0	234260000	547210000	689590000	0	0	0	0	0	0	7303800	16263000	13291000	25017000	747130000	737750000	625580000	0.0217673
60S ribosomal protein L37a	RPL37A		0	0	0	0	865460000	887390000	995240000	0	0	0	0	0	0	0	0	0	0	876600000	1078500000	1138700000	0	0	0	0	0	0	0	0	0	0	234260000	547210000	689590000	0	0	0	0	0	0	0	1824700	0	0	747130000	737750000	625580000	0.00244228
40S ribosomal protein S10	RPS10		0	0	0	0	865460000	887390000	995240000	0	0	0	0	0	0	6591200	0	5887700	0	876600000	1078500000	1138700000	0	0.00545916	0	∞	∞	∞	0	11758000	3706600	0	234260000	547210000	689590000	0.0501921	0.00677363	0	0	∞	0.134954	0	4584000	2259000	0	747130000	737750000	625580000	0.00613548
40S ribosomal protein S12	RPS12		0	0	0	0	865460000	887390000	995240000	0	0	0	0	0	0	0	0	0	0	876600000	1078500000	1138700000	0	0	0	0	0	0	0	0	0	0	234260000	547210000	689590000	0	0	0	0	0	0	8034400	2506600	0	0	747130000	737750000	625580000	0.00335497
40S ribosomal protein S13	RPS13		0	0	0	0	865460000	887390000	995240000	0	0	0	0	0	0	0	0	0	9702500	876600000	1078500000	1138700000	0	0	0.00852068	0	0	0	0	0	0	0	234260000	547210000	689590000	0	0	0	0	0	0	0	5093300	5039700	0	747130000	737750000	625580000	0.00681715
40S ribosomal protein S14	RPS14		6895500	0	0	0	865460000	887390000	995240000	0	0	0	∞	0	0	41027000	3508500	21255000	0	876600000	1078500000	1138700000	0.0040024	0.0197079	0	11.6936	∞	4.92403	0	0	0	0	234260000	547210000	689590000	0	0	0	0	0	0	7695500	8696300	0	3425800	747130000	737750000	625580000	0.0116396
40S ribosomal protein S15a	RPS15A		0	0	0	0	865460000	887390000	995240000	0	0	0	0	0	0	9886900	0	0	0	876600000	1078500000	1138700000	0	0	0	∞	0	0	0	0	0	0	234260000	547210000	689590000	0	0	0	0	0	0	1815400	3069400	3206900	5418300	747130000	737750000	625580000	0.00410825
40S ribosomal protein S16	RPS16		21651000	0	9213800	16169000	865460000	887390000	995240000	0	0.010383	0.0162463	∞	0.6391	∞	61833000	0	25914000	15090000	876600000	1078500000	1138700000	0	0.0240278	0.013252	∞	1.81315	∞	13968000	13263000	0	18069000	234260000	547210000	689590000	0.0566166	0	0.0262025	1.05316	0	0	23700000	12057000	12111000	19414000	747130000	737750000	625580000	0.0161378
40S ribosomal protein S18	RPS18		4276600	14917000	0	0	865460000	887390000	995240000	0.0172359	0	0	0.286693	0	0	35555000	23510000	0	0	876600000	1078500000	1138700000	0.0268195	0	0	1.51234	0	0	0	0	0	0	234260000	547210000	689590000	0	0	0	0	0	0	8758000	5756000	10581000	7096100	747130000	737750000	625580000	0.00770415
40S ribosomal protein S2	RPS2		0	12556000	0	0	865460000	887390000	995240000	0.0145079	0	0	0	0	0	0	0	0	0	876600000	1078500000	1138700000	0	0	0	0	0	0	0	0	0	0	234260000	547210000	689590000	0	0	0	0	0	0	26399000	6781600	14830000	13800000	747130000	737750000	625580000	0.00907687
40S ribosomal protein S20	RPS20		0	31810000	0	0	865460000	887390000	995240000	0.036755	0	0	0	0	0	19213000	8758400	7853200	6309500	876600000	1078500000	1138700000	0.00999133	0.00728159	0.00554097	2.19367	1.31414	0.728791	0	0	0	0	234260000	547210000	689590000	0	0	0	0	0	0	13488000	4879400	8765500	7311700	747130000	737750000	625580000	0.00653086
40S ribosomal protein S25	RPS25		8048800	15851000	0	0	865460000	887390000	995240000	0.0183151	0	0	0.507779	0	0	34642000	11859000	2179800	2822400	876600000	1078500000	1138700000	0.0135284	0.00202114	0.00247862	2.92116	0.815431	0.1494	173460000	7379500	5993400	0	234260000	547210000	689590000	0.0315013	0.0109527	0	23.5057	∞	0.347689	9126800	0	6644500	5164500	747130000	737750000	625580000	0
40S ribosomal protein S3	RPS3		17835000	21337000	0	19379000	865460000	887390000	995240000	0.0246539	0	0.0194717	0.835872	0	0	79426000	41102000	29693000	23500000	876600000	1078500000	1138700000	0.046888	0.0275318	0.0206376	1.93241	1.33406	0.587182	58062000	22796000	0	18544000	234260000	547210000	689590000	0.0973107	0	0.0268913	2.54703	0	0	35005000	16485000	21868000	8198300	747130000	737750000	625580000	0.0220644
40S ribosomal protein S5;40S ribosomal protein S5, N-terminally processed	RPS5		0	0	0	0	865460000	887390000	995240000	0	0	0	0	0	0	0	0	12819000	6480600	876600000	1078500000	1138700000	0	0.011886	0.00569123	0	2.08847	∞	0	16580000	0	0	234260000	547210000	689590000	0.0707761	0	0	0	0	0	5312200	7041600	0	0	747130000	737750000	625580000	0.00942487
40S ribosomal protein S6	RPS6		5969900	0	0	0	865460000	887390000	995240000	0	0	0	∞	0	0	24281000	0	0	9261900	876600000	1078500000	1138700000	0	0	0.00813375	∞	0	0	0	0	0	0	234260000	547210000	689590000	0	0	0	0	0	0	47302000	43295000	62494000	39277000	747130000	737750000	625580000	0.0579484
40S ribosomal protein S7	RPS7		0	0	0	0	865460000	887390000	995240000	0	0	0	0	0	0	6773500	0	0	0	876600000	1078500000	1138700000	0	0	0	∞	0	0	0	0	0	0	234260000	547210000	689590000	0	0	0	0	0	0	11571000	1606200	3122100	0	747130000	737750000	625580000	0.00214983
40S ribosomal protein SA	RPSA		7520200	11136000	0	0	865460000	887390000	995240000	0.0128671	0	0	0.675305	0	0	20094000	0	0	0	876600000	1078500000	1138700000	0	0	0	∞	0	0	19115000	0	0	0	234260000	547210000	689590000	0	0	0	∞	0	0	4782800	3208200	9959600	6783300	747130000	737750000	625580000	0.00429403
Reticulon-3	RTN3		0	0	0	0	865460000	887390000	995240000	0	0	0	0	0	0	0	7822200	0	0	876600000	1078500000	1138700000	0.00892334	0	0	0	0	0	0	0	0	0	234260000	547210000	689590000	0	0	0	0	0	0	3057200	0	7604300	5601000	747130000	737750000	625580000	0
Protein S100-A10	S100A10		0	24851000	0	11297000	865460000	887390000	995240000	0.0287142	0	0.011351	0	0	0	41545000	37534000	18778000	19676000	876600000	1078500000	1138700000	0.0428177	0.0174112	0.0172794	1.10686	1.00763	0.406636	29256000	21726000	0	0	234260000	547210000	689590000	0.0927431	0	0	1.34659	0	0	27638000	21439000	0	0	747130000	737750000	625580000	0.0286951
Protein S100-A11;Protein S100-A11, N-terminally processed	S100A11		0	11684000	0	0	865460000	887390000	995240000	0.0135003	0	0	0	0	0	33577000	0	0	0	876600000	1078500000	1138700000	0	0	0	∞	0	0	0	0	0	0	234260000	547210000	689590000	0	0	0	0	0	0	6241600	0	7769300	6421800	747130000	737750000	625580000	0
Protein S100-A6	S100A6		90854000	128330000	111380000	51175000	865460000	887390000	995240000	0.14828	0.125514	0.0514198	0.707972	2.44097	0.84647	217420000	124690000	27796000	40296000	876600000	1078500000	1138700000	0.142243	0.0257728	0.0353877	1.74368	0.728299	0.181189	111410000	146140000	22873000	58806000	234260000	547210000	689590000	0.623837	0.0417993	0.0852768	0.762351	0.490161	0.0670036	43254000	22033000	28533000	81779000	747130000	737750000	625580000	0.0294902
Histone deacetylase complex subunit SAP130	SAP130		0	0	0	0	865460000	887390000	995240000	0	0	0	0	0	0	0	0	0	0	876600000	1078500000	1138700000	0	0	0	0	0	0	0	0	0	0	234260000	547210000	689590000	0	0	0	0	0	0	0	0	0	0	747130000	737750000	625580000	0
Secretogranin-3	SCG3		0	0	0	0	865460000	887390000	995240000	0	0	0	0	0	0	0	0	0	0	876600000	1078500000	1138700000	0	0	0	0	0	0	0	0	0	0	234260000	547210000	689590000	0	0	0	0	0	0	0	0	0	0	747130000	737750000	625580000	0
Alpha-1-antitrypsin;Short peptide from AAT	SERPINA1		0	0	12229000	0	865460000	887390000	995240000	0	0.0137809	0	0	∞	∞	0	0	0	0	876600000	1078500000	1138700000	0	0	0	0	0	0	0	0	1131500000	0	234260000	547210000	689590000	0	2.06776	0	0	∞	∞	0	0	0	0	747130000	737750000	625580000	0
Alpha-1-antichymotrypsin;Alpha-1-antichymotrypsin His-Pro-less	SERPINA3		0	0	0	0	865460000	887390000	995240000	0	0	0	0	0	0	0	0	0	0	876600000	1078500000	1138700000	0	0	0	0	0	0	0	0	82930000	0	234260000	547210000	689590000	0	0.151551	0	0	∞	∞	0	0	0	0	747130000	737750000	625580000	0
Protein SET;Protein SETSIP	SET;SETSIP		2365300	0	0	0	865460000	887390000	995240000	0	0	0	∞	0	0	7860400	0	7003400	0	876600000	1078500000	1138700000	0	0.00649365	0	∞	∞	∞	0	0	0	0	234260000	547210000	689590000	0	0	0	0	0	0	12533000	1872600	10358000	5293000	747130000	737750000	625580000	0.00250639
S-phase kinase-associated protein 1	SKP1		0	0	0	0	865460000	887390000	995240000	0	0	0	0	0	0	0	0	0	422280	876600000	1078500000	1138700000	0	0	0.000370844	0	0	0	0	0	0	4717700	234260000	547210000	689590000	0	0	0.00684131	0	0	0	11746000	7834300	0	10553000	747130000	737750000	625580000	0.0104859
Small nuclear ribonucleoprotein Sm D1	SNRPD1		394780000	178020000	38046000	18830000	865460000	887390000	995240000	0.205694	0.042874	0.0189201	2.21762	2.26606	0.208436	586890000	92021000	81480000	78186000	876600000	1078500000	1138700000	0.104975	0.0755494	0.0686625	6.37778	1.1003	0.71969	512800000	0	0	20795000	234260000	547210000	689590000	0	0	0.0301556	∞	0	0	241100000	100670000	92555000	120270000	747130000	737750000	625580000	0.134742
Small nuclear ribonucleoprotein Sm D2	SNRPD2		43774000	0	11051000	0	865460000	887390000	995240000	0	0.0124534	0	∞	∞	∞	12619000	0	0	5227700	876600000	1078500000	1138700000	0	0	0.00459094	∞	0	0	12971000	0	0	0	234260000	547210000	689590000	0	0	0	∞	0	0	9154300	3868500	3056100	1134700	747130000	737750000	625580000	0.00517781
Small nuclear ribonucleoprotein Sm D3	SNRPD3		85462000	88443000	24418000	54694000	865460000	887390000	995240000	0.102192	0.0275166	0.0549556	0.966295	0.500707	0.269264	126770000	120540000	98486000	98382000	876600000	1078500000	1138700000	0.137509	0.0913176	0.0863985	1.05168	1.05693	0.664086	0	19100000	0	41725000	234260000	547210000	689590000	0.0815333	0	0.060507	0	0	0	33326000	18021000	29316000	32685000	747130000	737750000	625580000	0.0241203
Small nuclear ribonucleoprotein-associated protein N;Small nuclear ribonucleoprotein-associated proteins B and B	SNRPN;SNRPB		61800000	28591000	22642000	67763000	865460000	887390000	995240000	0.0330356	0.0255153	0.0680871	2.16152	0.374745	0.772357	110170000	58433000	55810000	62060000	876600000	1078500000	1138700000	0.0666587	0.0517478	0.0545007	1.88541	0.949488	0.77631	112110000	51717000	36061000	37309000	234260000	547210000	689590000	0.220768	0.0658997	0.0541032	2.16776	1.21804	0.298503	16298000	7750800	8149100	9120300	747130000	737750000	625580000	0.0103741
Spindlin-1	SPIN1		12895000	33376000	0	10821000	865460000	887390000	995240000	0.0385645	0	0.0108728	0.386355	0	0	33367000	9322900	6421100	10645000	876600000	1078500000	1138700000	0.0106353	0.00595373	0.00934838	3.57904	0.636873	0.559809	0	6816800	0	21585000	234260000	547210000	689590000	0.0290993	0	0.0313012	0	0	0	3074800	5866200	2838400	3375700	747130000	737750000	625580000	0.00785165
Spectrin beta chain, non-erythrocytic 1	SPTBN1		0	0	0	0	865460000	887390000	995240000	0	0	0	0	0	0	0	0	0	0	876600000	1078500000	1138700000	0	0	0	0	0	0	0	0	0	0	234260000	547210000	689590000	0	0	0	0	0	0	0	0	0	0	747130000	737750000	625580000	0
Serine/arginine-rich splicing factor 1	SRSF1		10299000	0	0	10496000	865460000	887390000	995240000	0	0	0.0105462	∞	0	0	15353000	0	17659000	19580000	876600000	1078500000	1138700000	0	0.0163737	0.017195	∞	0.952232	∞	26494000	0	0	4618500	234260000	547210000	689590000	0	0	0.00669746	∞	0	0	3349600	3431600	0	3512800	747130000	737750000	625580000	0.00459304
Stress-induced-phosphoprotein 1	STIP1		0	0	0	0	865460000	887390000	995240000	0	0	0	0	0	0	0	0	15960000	8528800	876600000	1078500000	1138700000	0	0.0147983	0.00748994	0	1.97576	∞	0	0	0	0	234260000	547210000	689590000	0	0	0	0	0	0	2751200	2685300	7673600	10703000	747130000	737750000	625580000	0.00359415
Serine-threonine kinase receptor-associated protein	STRAP		18113000	0	14891000	0	865460000	887390000	995240000	0	0.0167807	0	∞	∞	∞	24573000	14103000	13518000	0	876600000	1078500000	1138700000	0.0160883	0.0125341	0	1.7424	∞	0.77908	34914000	0	10867000	0	234260000	547210000	689590000	0	0.0198589	0	∞	∞	∞	2025500	0	0	0	747130000	737750000	625580000	0
SUN domain-containing protein 2	SUN2		45226000	19684000	7867000	13193000	865460000	887390000	995240000	0.022744	0.00886532	0.0132561	2.2976	0.668773	0.389788	74042000	22045000	18565000	11834000	876600000	1078500000	1138700000	0.0251483	0.0172137	0.0103926	3.35868	1.65635	0.684489	29690000	36054000	6593000	0	234260000	547210000	689590000	0.153906	0.0120484	0	0.823487	∞	0.0782841	20627000	15280000	15434000	8544500	747130000	737750000	625580000	0.0204516
Synaptotagmin-9	SYT9		11005000	24123000	0	16202000	865460000	887390000	995240000	0.027873	0	0.0162795	0.456204	0	0	15708000	34201000	19436000	20867000	876600000	1078500000	1138700000	0.0390155	0.0180213	0.0183253	0.459285	0.983413	0.461902	31047000	36741000	34888000	31807000	234260000	547210000	689590000	0.156839	0.0637561	0.0461245	0.845023	1.38226	0.406508	0	0	0	0	747130000	737750000	625580000	0
Transcription initiation factor TFIID subunit 12	TAF12		5579200	1395400	0	0	865460000	887390000	995240000	0.00161232	0	0	3.99828	0	0	16561000	6389900	0	0	876600000	1078500000	1138700000	0.00728941	0	0	2.59175	0	0	17231000	0	0	11848000	234260000	547210000	689590000	0	0	0.0171812	∞	0	0	0	0	0	0	747130000	737750000	625580000	0
Transgelin-2	TAGLN2		48298000	89248000	31202000	10819000	865460000	887390000	995240000	0.103122	0.0351615	0.0108707	0.541166	3.23451	0.34097	194960000	68646000	78705000	17676000	876600000	1078500000	1138700000	0.0783094	0.0729764	0.015523	2.84008	4.70119	0.931898	130270000	17888000	0	9483000	234260000	547210000	689590000	0.0763596	0	0.0137516	7.28254	0	0	68367000	14738000	40936000	36231000	747130000	737750000	625580000	0.0197262
Transaldolase	TALDO1		0	1086400	0	6708900	865460000	887390000	995240000	0.00125529	0	0.00674099	0	0	0	0	6003900	26828000	0	876600000	1078500000	1138700000	0.00684908	0.0248753	0	0	∞	3.63192	0	0	0	0	234260000	547210000	689590000	0	0	0	0	0	0	0	0	1605200	176930	747130000	737750000	625580000	0
TAR DNA-binding protein 43	TARDBP		0	10724000	0	0	865460000	887390000	995240000	0.0123911	0	0	0	0	0	10847000	8973200	0	0	876600000	1078500000	1138700000	0.0102364	0	0	1.20882	0	0	0	0	0	0	234260000	547210000	689590000	0	0	0	0	0	0	544810	0	1165100	0	747130000	737750000	625580000	0
Lamina-associated polypeptide 2, isoforms beta/gamma;Thymopoietin;Thymopentin;Lamina-associated polypeptide 2, isoform alpha;Thymopoietin;Thymopentin	TMPO		21792000	7676600	0	0	865460000	887390000	995240000	0.00886997	0	0	2.83876	0	0	47493000	0	0	0	876600000	1078500000	1138700000	0	0	0	∞	0	0	0	0	0	0	234260000	547210000	689590000	0	0	0	0	0	0	7369900	2184000	0	0	747130000	737750000	625580000	0.00292319
Toll-interacting protein	TOLLIP		0	69750000	2736100	26752000	865460000	887390000	995240000	0.080593	0.00308331	0.0268799	0	0.114707	0.0382578	0	0	0	25276000	876600000	1078500000	1138700000	0	0	0.0221972	0	0	0	0	76640000	19213000	0	234260000	547210000	689590000	0.327158	0.0351108	0	0	∞	0.107321	8563700	61437000	3938000	1157700	747130000	737750000	625580000	0.0822307
Tropomyosin alpha-1 chain	TPM1		0	0	0	0	865460000	887390000	995240000	0	0	0	0	0	0	0	0	0	0	876600000	1078500000	1138700000	0	0	0	0	0	0	0	0	43563000	59636000	234260000	547210000	689590000	0	0.0796093	0.0864804	0	0.920548	∞	20910000	1916400	3970900	2539200	747130000	737750000	625580000	0.00256502
Tropomyosin alpha-3 chain	TPM3		10502000	479530000	221140000	72238000	865460000	887390000	995240000	0.554075	0.249203	0.0725835	0.0219006	3.43332	0.449763	148130000	96162000	97299000	232890000	876600000	1078500000	1138700000	0.109699	0.090217	0.204523	1.54042	0.44111	0.822406	10138000	418000000	32587000	375560000	234260000	547210000	689590000	1.78434	0.0595512	0.544613	0.0242536	0.109346	0.0333743	430590000	124680000	128500000	101930000	747130000	737750000	625580000	0.166879
Tropomyosin alpha-4 chain	TPM4		0	87738000	43497000	38097000	865460000	887390000	995240000	0.101377	0.0490168	0.0382792	0	1.28051	0.483508	111540000	24329000	64930000	61100000	876600000	1078500000	1138700000	0.0277538	0.060204	0.0536577	4.58465	1.122	2.16921	7035000	83781000	40856000	57030000	234260000	547210000	689590000	0.357641	0.0746624	0.0827013	0.0839689	0.902796	0.208763	293500000	37850000	39761000	34289000	747130000	737750000	625580000	0.0506605
Tubulin alpha-1C chain	TUBA1C		0	0	0	0	865460000	887390000	995240000	0	0	0	0	0	0	0	0	0	0	876600000	1078500000	1138700000	0	0	0	0	0	0	0	0	0	0	234260000	547210000	689590000	0	0	0	0	0	0	12182000	12275000	0	7815800	747130000	737750000	625580000	0.0164295
[truncated: 19 more rows]
[truncated: 19 more columns]

## Sheet: S2E. Nuclear Assoc Pr Hits
Table S10. 38 nuclear associated protein hit proteins from MDA-MB-468 cells
Enriched proteins from Table S2D showing nuclear localization (see column E).
[truncated: 41 more rows]
