# Supplementary material for: Differential profiles of HDAC1 substrates and associated proteins in breast cancer cells revealed by trapping
Source: Royal Society of Chemistry journal article supplement (doi:10.1039/d0mo00047g), 2021-04-06
Supplement: d0mo00047g3.xlsx [file d0mo00047g3.xlsx]

## Sheet: S3A. Raw MS Data
Table S3A. 383 proteins quantified using MaxQuant from MDA-MB-231 samples
Raw values from MaxQuant label-free quantitation are shown for all 383 proteins observed in six independent LC-MS/MS trials from MDA-MB-231 cells
Intensity values for each identified peptide are shown in columns C through Z. The top of each column indicates the sample: No protein- immunoprecipitation of untransfected cell (no HDAC1-Flag expressed bead binding control); WT- immunoprecipitated from cell lysated expressing wild type HDAC1-Flag; MUT- immunoprecitated from cell lysates expressing C151A mutant HDAC1-Flag; MUT+SAHA- SAHA was incl…
Multiple protein and gene names are listed when the peptide identified by LC-MS/MS is found in multiple isoforms of the protein.
HDAC1 levels (see top yellow highlighted row) were compared to determine if samples within each trial had similar immunoprecipitated proteins. Trial 1 showed significantly different HDAC1 levels in MT, MUT, and MUT+SAHA samples within the trial (see columns C-F in red) and was removed. The remaining five trials (Trials 2-6, columns G-Z) were used in subsequent analysis (Tables S8).
Protein names	Gene names	Trial 1- No protein	Trial 1- WT	Trial 1- MUT	Trial 1- MUT+SAHA	Trial 2- No protein	Trial 2- WT	Trial 2- MUT	Trial 2- MUT+SAHA	Trial 3- No protein	Trial 3- WT	Trial 3- MUT	Trial 3- MUT+SAHA	Trial 4- No protein	Trial 4- WT	Trial 4- MUT	Trial 4- MUT+SAHA	Trial 5- No protein	Trial 5- WT	Trial 5- MUT	Trial 5- MUT+SAHA	Trial 6- No protein	Trial 6- WT	Trial 6- MUT	Trial 6- MUT+SAHA
Histone deacetylase 1	HDAC1	12715000	0	0	0	978220000	338360000	2492900000	2094200000	1462000000	601680000	838260000	516410000	1935400000+AP8:AS390	1131900000	729420000	840470000	463420	754030000	964080000	609030000	0	2311000000	1412000000	1044200000
Microfibrillar-associated protein 1	MFAP1	1183200	2568500	2465800	4154000	0	0	2427600	0	0	0	0	0	0	0	0	0	0	942200	1468200	0	0	1100100	1721100	678570
Thyroid hormone receptor-associated protein 3	THRAP3	15260000	68616000	46875000	35103000	0	470660	9905700	7452500	10784000	0	0	0	16385000	0	0	0	33367000	54980000	90385000	36443000	0	15917000	65997000	28025000
BolA-like protein 2	BOLA2	19672000	32975000	0	0	0	1962400	23798000	15162000	0	0	9565700	0	0	0	0	0	0	0	0	0	0	0	0	0
40S ribosomal protein S4, X isoform;40S ribosomal protein S4, Y isoform 1	RPS4X;RPS4Y1	8799700	0	0	6528000	0	0	9309400	4814600	8519600	22707000	0	5090400	15952000	12535000	0	2573500	0	4852200	0	0	0	0	5403600	0
26S proteasome non-ATPase regulatory subunit 8	PSMD8	0	0	2568700	8405000	0	0	0	0	16711000	0	0	0	17168000	19667000	24823000	26508000	0	3357600	0	0	0	0	5856100	3415400
Protein Daple	CCDC88C	0	2533600	1115500	1927900	0	0	32263000	0	0	0	0	0	0	0	0	0	34019000	20467000	2454600	19258000	0	2118700	21040000	2024200
60S ribosomal protein L24	RPL24	15101000	0	0	0	0	0	5367400	0	57618000	116260000	0	0	63455000	33349000	6322500	5006700	0	0	0	0	0	3447800	6027900	0
DnaJ homolog subfamily C member 10	DNAJC10	0	0	7954800	0	0	0	6815300	0	0	0	0	0	0	0	0	0	11446000	5613300	5869900	0	4429100	5552800	5732500	0
26S proteasome non-ATPase regulatory subunit 13	PSMD13	9630500	24701000	17753000	3968900	0	0	0	12046000	4329800	4523900	5486000	0	0	13414000	13027000	0	7011100	0	0	0	0	9702200	12360000	6744700
Transgelin-2;Transgelin-3	TAGLN2;TAGLN3	11889000	3474200	6259400	5790400	0	0	5505300	0	0	0	0	0	9685600	0	0	0	0	0	2101100	0	0	0	0	4184800
Lysine-specific histone demethylase 1A	KDM1A	0	0	0	0	0	0	6300200	0	0	0	0	0	0	0	0	0	0	0	38802000	10581000	0	0	0	14902000
Nuclease-sensitive element-binding protein 1	YBX1	2398400	1542800	6926000	1017600	0	0	0	1735800	8109600	40866000	11598000	0	65435000	13840000	0	0	0	3199200	5906900	978180	0	1989400	3971900	0
Chloride intracellular channel protein 1	CLIC1	8519300	0	0	6926700	0	0	5967000	0	0	0	0	0	0	0	0	0	0	0	4976300	0	0	3511800	0	6856100
Protein NDRG1	NDRG1	56383000	14326000	10908000	31225000	0	0	0	0	0	0	0	0	6386700	0	0	0	0	0	4861500	0	0	5338000	9773000	2909000
60S ribosomal protein L13	RPL13	10848000	5811100	34696000	5661400	0	0	9134700	0	282550000	307900000	15224000	11402000	135400000	25288000	9887800	0	0	10214000	16361000	8751600	0	6315500	10865000	14634000
Tropomodulin-3	TMOD3	573260000	360540000	19636000	196020000	522510000	151400000	62465000	60875000	2424400000	1831500000	0	0	1308400000	501670000	0	3139200	26505000	84297000	225820000	37992000	0	34978000	90802000	50091000
Unconventional myosin-VI	MYO6	470120000	43526000	116370000	72425000	455220000	31978000	151780000	61643000	5132300000	2171700000	23017000	39598000	2078900000	142160000	18665000	18715000	26153000	185350000	317170000	32708000	5857300	40026000	296200000	169990000
Tropomyosin alpha-4 chain	TPM4	244890000	14849000	34619000	87478000	12492000	12679000	0	10696000	1258000000	985890000	23208000	5134000	496500000	85916000	0	20117000	0	11551000	60996000	24094000	0	72223000	71407000	21034000
T-complex protein 1 subunit eta	CCT7	48816000	15836000	29030000	42805000	25625000	26829000	74839000	74070000	92285000	68008000	62353000	61710000	187180000	38989000	77205000	66710000	15695000	23685000	210070000	79744000	0	93530000	184300000	83831000
T-complex protein 1 subunit beta	CCT2	0	0	6528700	0	1003600000	5142600	98078000	50255000	75088000	86651000	33537000	32656000	129500000	45133000	46429000	63890000	0	73222000	686350000	259280000	0	100430000	338470000	155870000
T-complex protein 1 subunit zeta	CCT6A	31289000	0	5349900	14466000	37633000	10622000	46971000	124920000	135830000	111670000	151530000	62348000	116480000	91589000	51985000	33074000	20324000	86142000	658080000	277810000	10250000	141190000	350010000	217210000
Enhancer of rudimentary homolog	ERH	167840000	130180000	138830000	132720000	51715000	11495000	88117000	113360000	94852000	64155000	59054000	79159000	67567000	37102000	66334000	44728000	16387000	53589000	133530000	50698000	93881000	142680000	164080000	95533000
Actin, alpha cardiac muscle 1;Actin, gamma-enteric smooth muscle;Actin, aortic smooth muscle;Actin, alpha skeletal muscle	ACTC1;ACTG2;ACTA2;ACTA1	4212000000	2481300000	1151000000	2516400000	3324700000	396640000	814180000	952260000	13815000000	13687000000	81178000	0	7809600000	2901800000	47358000	73027000	0	22064000	239970000	13963000	0	170230000	288980000	109280000
T-complex protein 1 subunit alpha	TCP1	23729000	25577000	36819000	35003000	6303000	818220	84147000	143050000	72857000	44540000	11040000	5388100	130910000	48405000	27119000	83215000	9352500	57694000	806050000	233640000	42222000	177750000	408150000	219840000
Myosin-10	MYH10	548570000	3487600000	2044900000	2474100000	445910000	569970000	1722400000	1146100000	2957400000	22268000000	480050000	283220000	1658200000	408040000	197890000	33590000	16864000	1688900000	3342300000	473480000	85182000	552110000	1383400000	796480000
Myosin-9	MYH9	3268000000	16904000000	8693000000	9800600000	3555900000	4393700000	7597000000	5651200000	29462000000	153280000000	5489300000	3772300000	12639000000	3499200000	5008600000	1097700000	97609000	9360300000	15175000000	5059600000	29287000	4615100000	9109600000	5981100000
Eukaryotic translation initiation factor 5A-2;Eukaryotic translation initiation factor 5A-1-like;Eukaryotic translation initiation factor 5A-1	EIF5A2;EIF5AL1;EIF5A	0	0	0	0	0	0	0	0	0	0	5143800	0	10898000	0	0	0	0	0	0	0	0	0	0	0
Uncharacterized protein KIAA0226-like	KIAA0226L	0	0	0	0	0	0	0	0	0	0	9060500	0	0	0	0	0	0	0	0	0	0	0	0	0
Tripartite motif-containing protein 38	TRIM38	0	0	4869800	16865000	0	4049200	43393000	0	0	0	25655000	16727000	33263000	0	0	0	0	0	0	0	0	0	0	0
Spectrin alpha chain, non-erythrocytic 1	SPTAN1	0	0	26105000	0	0	0	0	0	23377000	240170000	0	0	0	0	8852900	0	0	0	0	0	0	0	0	0
Inactive tyrosine-protein kinase 7	PTK7	1526400	0	0	0	0	0	1384800	0	7724500	0	0	370750	0	1961500	0	3410500	0	0	0	0	0	0	0	0
Golgin subfamily A member 2	GOLGA2	55564000	0	0	0	0	0	21968000	11427000	26284000	11312000	25034000	23260000	22163000	8403900	28829000	13137000	0	0	0	0	0	0	0	0
Isocitrate dehydrogenase [NADP] cytoplasmic	IDH1	0	0	0	0	0	0	0	0	0	0	0	5722500	5006700	8914900	9524200	0	0	0	0	0	0	0	0	0
Galectin-1	LGALS1	61957000	0	34838000	48617000	0	0	14450000	8263100	7870400	0	0	0	0	11424000	0	0	0	0	0	0	0	0	0	0
EF-hand calcium-binding domain-containing protein 5	EFCAB5	26541000	43110000	79036000	50710000	0	0	36639000	11461000	16289000	0	0	0	0	16659000	0	0	0	0	0	0	0	0	0	0
Protein S100-A6	S100A6	26808000	25089000	0	15425000	0	0	16978000	0	19801000	45427000	0	8297800	20455000	19183000	3974600	4323600	0	0	0	0	0	0	0	0
Synaptotagmin-9	SYT9	23197000	27462000	31923000	0	0	0	0	0	37216000	37819000	0	0	0	35075000	54875000	0	0	0	0	0	0	0	0	0
Dihydrolipoyllysine-residue succinyltransferase component of 2-oxoglutarate dehydrogenase complex, mitochondrial	DLST	66372000	183490000	169380000	147290000	33321000	9090800	93041000	99842000	108670000	109600000	79546000	78538000	46913000	62211000	59737000	7099100	6853000	0	0	0	0	0	0	0
Pancreatic alpha-amylase	AMY2A	0	0	0	0	0	0	0	0	6240200	4917000	8186000	5845200	0	5063100	7272500	0	0	0	0	5827000	0	0	0	0
Protein slowmo homolog 1	SLMO1	0	92449000	75793000	0	0	124540000	73706000	0	22586000	24451000	0	109270000	116160000	150230000	238540000	90840000	0	0	0	8441500	0	0	0	0
Golgin subfamily A member 3	GOLGA3	96298000	73063000	65754000	86468000	0	0	17238000	48256000	0	0	0	0	0	23912000	38825000	0	3334800	3199600	0	0	0	0	0	0
26S proteasome non-ATPase regulatory subunit 1	PSMD1	0	0	0	0	0	0	9773400	0	0	0	0	0	12359000	0	0	0	13585000	11578000	1074600	23708000	0	0	0	0
Transketolase	TKT	0	0	0	0	0	0	5958100	0	0	0	0	0	0	0	0	0	0	0	0	0	0	0	0	6480900
40S ribosomal protein S8	RPS8	0	0	0	0	0	0	0	0	99502000	135430000	5089700	0	79260000	34123000	11962000	11927000	0	0	0	0	0	0	2748200	0
Activated RNA polymerase II transcriptional coactivator p15	SUB1	0	0	0	0	0	1932400	0	0	0	0	0	0	0	0	0	0	0	0	0	0	0	0	2878100	0
40S ribosomal protein S3	RPS3	15420000	7103900	8510500	0	0	0	0	0	0	4533900	0	0	0	0	0	0	0	0	0	0	0	0	2959200	0
40S ribosomal protein S9	RPS9	9904900	0	0	0	0	0	0	0	0	44046000	0	0	57691000	20560000	0	0	0	0	0	0	0	0	4140100	0
Melanoma-associated antigen B1	MAGEB1	4613600	759580	1894600	9388300	0	0	22840000	0	6193700	0	78059	0	4486400	3084000	7307500	5551500	3766600	1336000	0	3204900	11609000	0	4290300	0
Heterogeneous nuclear ribonucleoprotein M	HNRNPM	0	9077000	0	0	0	0	0	0	12165000	15518000	0	0	4167400	6407800	0	0	0	0	0	0	0	0	5625900	0
Cytoskeleton-associated protein 5	CKAP5	8538500	0	0	0	0	0	0	5303800	0	0	0	0	0	0	0	0	0	0	0	0	0	0	5957100	0
Cyclin-dependent kinase 1;Cyclin-dependent-like kinase 5;Cyclin-dependent kinase 2;Cyclin-dependent kinase 4;Cyclin-dependent kinase 3;Cyclin-dependent kinase 6;Cyclin-dependent kinase 9;Cyclin-dependent kinase 15;Cyclin-dependent kinase 14;Cyclin-dependent kinase 18;Cyclin-dependent kinase 16;Cyclin-dependent kinase 17;Cyclin-dependent kinase 12;Cyclin-dependent kinase 13	CDK1;CDK5;CDK2;CDK4;CDK3;CDK6;CDK9;CDK15;CDK14;CDK18;CDK16;CDK17;CDK12;CDK13	28625000	14037000	10490000	10917000	0	0	0	5307700	37831000	20525000	0	0	20897000	7236100	5738000	0	0	0	0	0	0	0	6718700	0
Triosephosphate isomerase	TPI1	0	0	11910000	0	0	0	8588400	0	0	0	0	0	11086000	0	1523600	1721800	0	0	0	0	0	0	6843700	10029000
Protein S100-A9	S100A9	0	0	0	0	0	0	0	34829000	0	0	23317000	0	0	0	0	0	2050600	14863000	4781800	22316000	0	0	6924000	18043000
Phosphoglycerate mutase 2;Phosphoglycerate mutase 1;Probable phosphoglycerate mutase 4	PGAM2;PGAM1;PGAM4	32785000	0	0	34891000	0	0	10117000	0	0	0	0	0	8357700	0	0	0	0	0	0	8973700	0	0	7045700	35164000
Tropomyosin alpha-1 chain	TPM1	0	18397000	0	10112000	4100400	0	0	0	120490000	103560000	27115000	4925900	96451000	43134000	54170000	36361000	0	0	0	0	0	0	7782500	0
Peroxiredoxin-2	PRDX2	0	0	6537300	9510100	9848300	0	8556200	0	13393000	0	0	0	14321000	0	0	0	0	0	5728600	8461000	0	0	8931700	0
Mitogen-activated protein kinase kinase kinase 7	MAP3K7	16159000	3018000	3865400	4749000	0	363860	16807000	2146300	0	0	0	0	54274000	4779500	15488000	2127300	10428000	4576100	9518500	5562800	3961900	695270	3603800	9360900
40S ribosomal protein S23	RPS23	1840600	7904600	0	0	20469000	0	0	11868000	16254000	39753000	0	0	0	0	0	0	0	10750000	6305300	6133800	0	1318900	6862900	796930
Ras GTPase-activating protein-binding protein 2	G3BP2	8785000	4117700	0	1438600	1892000	0	0	0	0	10322000	0	0	16372000	0	0	0	914400	1170200	1762800	0	0	1450500	2109700	1447300
Phosphatidylinositol-binding clathrin assembly protein	PICALM	15251000	15330000	0	8492600	0	0	7047200	2377900	189580000	190710000	4891700	9445000	58668000	0	0	0	1244300	0	0	0	0	2859600	0	2983700
14-3-3 protein beta/alpha;14-3-3 protein beta/alpha, N-terminally processed	YWHAB	6424600	0	6484700	3116600	0	303560	3918700	0	0	0	0	0	0	0	0	0	191540	0	7447500	1189300	962550	3716100	3454200	3659100
L-lactate dehydrogenase A chain	LDHA	77738000	44159000	54354000	100650000	0	1635900	15996000	0	13762000	14637000	0	0	126330000	35529000	0	0	6048700	5955300	12778000	19353000	0	4275300	18650000	36446000
Ras GTPase-activating-like protein IQGAP1	IQGAP1	0	0	24514000	0	0	3833500	12092000	0	375400000	768350000	0	0	77424000	0	0	9326300	2854700	3005500	0	0	0	5526800	11352000	4672000
Polymerase I and transcript release factor	PTRF	13599000	0	0	0	0	0	13623000	0	0	9381100	0	0	0	0	0	0	726030	526060	6478400	10197000	1007300	5724400	10396000	10120000
GRIP1-associated protein 1	GRIPAP1	9417100	17640000	0	0	0	0	0	0	0	0	0	0	0	0	0	0	0	0	0	0	0	6471600	6908800	0
26S proteasome non-ATPase regulatory subunit 3	PSMD3	22395000	0	0	14606000	6357100	406740	0	5100700	0	0	0	0	0	0	9322500	0	14528000	0	14692000	11338000	8600800	6597000	19129000	14383000
HLA class I histocompatibility antigen, Cw-7 alpha chain;HLA class I histocompatibility antigen, B-73 alpha chain;HLA class I histocompatibility antigen, Cw-17 alpha chain	HLA-C;HLA-B	182130000	268340000	232460000	189020000	0	16852000	0	131560000	61154000	23883000	4060100	1104800	22050000	10885000	355190000	268430000	0	0	0	0	0	7524400	9237700	0
Metastasis-associated protein MTA2;Metastasis-associated protein MTA3;Metastasis-associated protein MTA1	MTA2;MTA3;MTA1	0	0	0	0	21962000	0	43132000	25981000	17496000	0	0	0	19450000	0	0	0	0	5761300	8247000	0	0	8137900	12735000	6569500
60S ribosomal protein L27	RPL27	31680000	25738000	29210000	29375000	0	1373500	13021000	11096000	39154000	74660000	0	0	33069000	24685000	0	0	0	0	0	0	0	8298900	8323500	0
Tropomyosin alpha-3 chain	TPM3	43729000	38316000	1090200	0	48286000	7490400	59902000	8152500	402750000	485620000	0	0	206030000	43089000	0	1567100	0	3827600	1512100	1740900	0	8406700	14299000	3938900
60S ribosomal protein L7	RPL7	64792000	32167000	6248100	0	51434000	353920	29887000	47362000	333060000	495430000	12277000	24039000	190820000	97247000	11363000	1824200	3425200	9219100	11685000	0	0	8472800	14004000	0
Putative pre-mRNA-splicing factor ATP-dependent RNA helicase DHX15	DHX15	14239000	0	0	0	0	0	0	0	0	0	0	0	0	5552100	4760300	0	9443800	5915500	0	6952800	0	8988500	0	9821300
Glutathione S-transferase omega-1	GSTO1	0	0	7508000	0	0	0	11967000	0	0	0	0	0	34248000	15339000	72193000	128240000	0	3718900	0	44427000	0	9882700	0	107100000
Glutaminyl-peptide cyclotransferase-like protein	QPCTL	24095000	33479000	23256000	10690000	3031300	949210	9974200	6260100	0	17030000	0	0	0	9774400	0	0	0	11817000	10271000	0	0	10445000	12781000	7544200
Retinoic acid-induced protein 3	GPRC5A	31841000	0	0	0	0	0	0	0	49995000	122510000	0	0	0	0	0	0	0	12845000	12189000	0	0	11349000	20408000	11752000
Poly(rC)-binding protein 1	PCBP1	38479000	20615000	44504000	25906000	0	1643900	18042000	0	37352000	25693000	8978500	4890100	15208000	14763000	0	0	16849000	0	10732000	8615000	8446800	11596000	14714000	15082000
Ig kappa chain V-III region NG9		61604000	0	0	0	0	0	0	0	0	0	24775000	11326000	0	0	0	0	8281100	6001300	0	13984000	18398000	12705000	13369000	29672000
Proteasome subunit alpha type-4	PSMA4	0	0	636070	0	0	1104100	16192000	0	0	0	0	0	55738000	0	0	26444000	0	10978000	10371000	0	0	13607000	0	10604000
26S protease regulatory subunit 4	PSMC1	25427000	33690000	12630000	25738000	0	0	0	14355000	0	0	0	0	0	0	0	0	12920000	0	12469000	0	0	16744000	13275000	0
TGF-beta-activated kinase 1 and MAP3K7-binding protein 1	TAB1	0	0	14572000	16914000	0	786670	14597000	0	18827000	0	25176000	0	60131000	11420000	0	8414100	18110000	12456000	17985000	11755000	2693600	16752000	0	16044000
Voltage-dependent anion-selective channel protein 1	VDAC1	0	11526000	25384000	18350000	0	0	0	0	0	0	0	0	0	0	0	0	0	1307400	0	1347400	0	17246000	18408000	13214000
Guanine nucleotide-binding protein G(I)/G(S)/G(T) subunit beta-2;Guanine nucleotide-binding protein subunit beta-4	GNB2;GNB4	101840000	43093000	3523500	9922100	44149000	22114000	14509000	0	217510000	221360000	0	0	75772000	21105000	11425000	0	0	0	7207500	10248000	0	19279000	21378000	13148000
26S protease regulatory subunit 7	PSMC2	18893000	6768200	24873000	0	0	0	9298400	13053000	0	0	10916000	0	0	0	0	0	31130000	10216000	0	0	0	19464000	26279000	25553000
Calmodulin	CALM1	199510000	94006000	94839000	116870000	85422000	20252000	0	29634000	725190000	714600000	31649000	0	510060000	256650000	7403600	11548000	0	60056000	57037000	20183000	0	19963000	61056000	25719000
Nucleosome assembly protein 1-like 1	NAP1L1	34985000	25349000	22684000	34879000	9784600	0	49781000	11092000	42874000	70818000	0	0	40517000	32127000	18310000	3252400	45118000	11959000	34781000	0	11904000	20030000	33499000	23436000
Endonuclease domain-containing 1 protein	ENDOD1	9907300	0	0	0	0	0	0	5231300	0	0	0	0	0	0	0	0	0	7854500	8596100	0	0	27684000	29891000	5721300
Monocarboxylate transporter 4	SLC16A3	10174000	0	5833200	0	0	0	5652600	3381900	0	0	0	0	0	2594200	0	0	961180	0	3881300	7533000	9286500	30686000	4822000	32163000
Ig kappa chain V-I region Lay;Ig kappa chain V-III region POM;Ig kappa chain V-III region VH;Ig kappa chain V-III region CLL		69676000	44830000	84312000	70495000	18855000	3010100	12309000	48657000	43341000	12487000	0	0	32073000	16428000	50312000	53866000	0	0	0	0	0	33682000	49234000	0
Unconventional myosin-Ib	MYO1B	335970000	62796000	30638000	154440000	769570000	92149000	87400000	136900000	3010800000	3168900000	0	8120000	1080100000	489930000	7171100	7349400	88950000	68402000	416070000	15059000	52543000	60746000	134370000	73352000
Histone H4	HIST1H4A	84647000	67456000	96616000	126450000	110410000	36581000	70666000	61121000	352080000	323110000	59744000	25573000	284430000	123400000	53060000	68235000	7469400	135860000	18351000	57631000	34366000	65423000	51836000	27244000
Ig gamma-2 chain C region	IGHG2	243170000	168550000	374610000	171700000	1510300000	131630000	1165900000	81723000	78610000	74928000	1677100	48423000	0	100490000	275810000	575910000	216150000	103890000	103200000	2498500	86943000	99892000	228170000	72022000
T-complex protein 1 subunit delta	CCT4	0	0	6377600	9473800	0	1307000	59776000	68073000	82935000	27664000	6619500	0	47618000	41963000	17150000	11842000	0	11161000	57070000	38120000	0	125180000	166980000	98755000
MOB kinase activator 2	MOB2	125120000	116470000	90438000	94337000	30650000	11441000	60904000	132160000	128980000	70383000	0	10152000	91210000	45076000	34061000	10325000	11831000	57534000	78196000	17880000	43745000	140380000	136460000	86151000
Serine/threonine-protein kinase 38-like	STK38L	82562000	46944000	52234000	71147000	21917000	6547100	66154000	100640000	121850000	77627000	55270000	0	101120000	121370000	71570000	39613000	109620000	118240000	117780000	77974000	74851000	228900000	169630000	113240000
Peroxiredoxin-1	PRDX1	571530000	279170000	232870000	351160000	0	16588000	90022000	220900000	365020000	164780000	31636000	1320000	203100000	182720000	19330000	27944000	15398000	42151000	3139200	4033800	62410000	294740000	282060000	81942000
Ig kappa chain V-IV region Len;Ig kappa chain V-IV region;Ig kappa chain V-IV region JI;Ig kappa chain V-IV region B17;Ig kappa chain V-IV region STH	IGKV4-1	316770000	183670000	205430000	251100000	59026000	11198000	118250000	165760000	137280000	77791000	128550000	124910000	118340000	135340000	178400000	157160000	38278000	109580000	81774000	41655000	183300000	330710000	177710000	133450000
78 kDa glucose-regulated protein	HSPA5	377100000	260060000	348270000	364390000	99205000	36297000	262020000	351100000	759940000	751390000	110380000	72684000	854140000	383880000	158580000	174090000	141710000	74982000	73345000	78069000	74146000	346140000	351130000	165820000
Protein phosphatase 1B	PPM1B	37650000	15642000	0	62234000	48477000	4395900	77457000	82821000	96728000	11389000	110400000	62628000	158530000	26366000	197530000	99506000	161220000	352060000	322480000	193370000	99681000	368950000	379110000	208610000
Small nuclear ribonucleoprotein Sm D3	SNRPD3	226840000	171550000	193510000	294810000	25919000	16458000	194550000	228950000	121550000	61468000	13411000	14747000	126220000	72959000	67641000	55414000	47670000	195770000	122490000	91456000	87019000	435950000	356230000	196070000
Acetyl-coenzyme A synthetase, cytoplasmic	ACSS2	607130000	1129700000	871110000	685140000	406530000	76673000	1314700000	1180700000	278830000	534000000	100070000	104840000	209820000	207690000	0	180920000	456580000	421400000	265820000	9882400	553630000	759160000	885850000	452630000
Myosin regulatory light chain 12B	MYL12B	2926500000	2542100000	1230000000	1497300000	2139100000	452640000	820820000	773490000	14824000000	13259000000	679720000	319800000	7280400000	2606500000	283840000	202090000	9681200	1109900000	1472400000	503650000	97372000	1160800000	1551300000	792070000
Ig kappa chain V-II region TEW;Ig kappa chain V-II region Cum;Ig kappa chain V-II region GM607;Ig kappa chain V-II region RPMI 6410		48740000000	43000000000	41814000000	45898000000	23084000000	25788000000	45970000000	40661000000	41478000000	46138000000	28592000000	13608000000	86418000000	47624000000	44095000000	41202000000	11825000000	21430000000	21884000000	15489000000	34272000000	55750000000	44907000000	5709800000
Proteasomal ubiquitin receptor ADRM1	ADRM1	1225000	0	530180	0	0	0	0	0	0	0	0	0	3969700	0	0	0	0	0	1137600	0	0	0	0	0
Apolipoprotein A-I;Proapolipoprotein A-I;Truncated apolipoprotein A-I	APOA1	0	0	0	0	0	0	0	0	0	0	0	0	0	0	0	0	0	0	1387300	0	1616500	0	0	0
60S ribosomal protein L17	RPL17	0	0	0	0	0	0	0	0	29076000	46898000	2933700	0	14404000	7802200	0	0	0	0	5013600	0	0	0	0	0
Nucleophosmin	NPM1	0	0	0	0	0	1302600	0	0	0	0	0	0	0	0	0	0	0	0	7879500	0	0	0	0	0
Target of Myb protein 1	TOM1	0	4589800	0	0	5364000	0	0	0	154010000	143390000	0	0	78499000	23674000	0	0	0	0	7935800	0	0	0	0	0
LIM domain and actin-binding protein 1	LIMA1	66344000	44812000	15751000	56957000	86758000	4249000	11793000	16845000	1255400000	780630000	0	0	490500000	55347000	0	4854800	0	0	13043000	0	0	0	0	0
60S ribosomal protein L23	RPL23	69456000	0	50750000	20675000	72240000	0	27756000	22186000	36821000	79007000	1540000	729620	39854000	25312000	0	0	0	0	2214500	0	0	0	0	3410200
Dedicator of cytokinesis protein 7	DOCK7	50672000	19641000	8948000	5115400	0	0	0	0	22718000	64970000	0	0	6804600	0	0	0	0	5809500	9221900	0	0	0	0	4110100
60S ribosomal protein L4	RPL4	0	0	24504000	0	3892600	0	0	3295000	276500000	287490000	0	5374700	59222000	58890000	2075500	0	0	6184000	9687500	0	0	0	0	4826800
Toll-interacting protein	TOLLIP	13900000	16622000	6419500	0	21461000	0	0	0	111380000	94733000	0	0	42056000	0	0	0	0	0	6708500	0	0	0	0	8241600
L-lactate dehydrogenase B chain	LDHB	13387000	0	384460	9451700	0	0	0	0	0	0	0	0	6499600	0	0	0	282720	749200	4400600	949510	0	0	0	9915400
Neurabin-2;Neurabin-1	PPP1R9B;PPP1R9A	0	0	0	0	0	0	0	0	33480000	8623600	0	0	0	0	0	0	0	0	1924900	0	0	0	0	14874000
Phosphoglycerate kinase 1	PGK1	15081000	0	0	0	0	0	0	0	0	11058000	0	0	17218000	0	0	0	0	0	11712000	0	0	0	0	22310000
Acyl-coenzyme A thioesterase 9, mitochondrial	ACOT9	868220	0	0	614240	0	0	0	0	0	0	0	0	0	0	0	0	585630	769280	1555800	365930	617490	0	969330	912060
Protein unc-45 homolog A	UNC45A	39281000	31869000	28548000	18602000	71394000	12931000	20081000	16878000	905930000	817830000	5939600	4707200	276210000	58426000	4489300	5819800	7702800	11645000	47961000	5776800	0	0	9451300	7621500
60S ribosomal protein L10a	RPL10A	54747000	26477000	16156000	19292000	0	5725700	0	20803000	170730000	185830000	0	7887500	111760000	21982000	0	0	0	8854400	15057000	5590500	15821000	0	17952000	12188000
Heat shock protein HSP 90-beta	HSP90AB1	16418000	7401500	8989300	25862000	8097500	2246200	6061500	0	63518000	53262000	0	4733100	99194000	21266000	7393900	0	0	0	22019000	2407200	0	3460600	6319600	19185000
Myosin phosphatase Rho-interacting protein	MPRIP	36566000	0	47755000	3833200	142130000	11281000	34671000	60295000	2851500000	1310600000	47042000	59087000	938790000	113720000	6736600	0	0	387310	6518400	664030	11285000	4597600	0	2848700
60 kDa heat shock protein, mitochondrial	HSPD1	10225000	0	14636000	0	12942000	437310	10647000	0	6600200	12082000	0	0	41489000	7803700	1598700	2411300	0	6486000	25790000	13598000	0	4802300	0	32778000
40S ribosomal protein S20	RPS20	0	0	0	0	0	0	0	0	0	0	0	5548700	0	0	0	0	0	0	7830900	0	0	8419700	0	0
Unconventional myosin-Ie	MYO1E	254810000	38606000	72302000	82656000	241100000	33874000	46677000	34120000	1126000000	887610000	0	11379000	483490000	113340000	0	0	0	140590000	255600000	40661000	0	28598000	155800000	121930000
Myosin-14	MYH14	0	168250000	0	23659000	31256000	47376000	48157000	10356000	116720000	1224300000	36497000	50948000	16943000	24695000	0	0	0	22263000	34773000	15668000	0	34496000	4848500	18741000
Gelsolin	GSN	2303700000	954810000	217710000	739150000	1429500000	501490000	208890000	360770000	8818300000	7664900000	64746000	13824000	4111200000	1229400000	12754000	36391000	0	188310000	387090000	68631000	0	84259000	141920000	124340000
T-complex protein 1 subunit epsilon	CCT5	0	0	13892000	8716800	56831000	1216600	92937000	89310000	127890000	87015000	67980000	35409000	54637000	5341600	26412000	22003000	0	80336000	324210000	173220000	0	113300000	197360000	155030000
Unconventional myosin-Ic	MYO1C	4954700000	2380800000	1591900000	1817700000	5435500000	1111600000	926180000	834180000	22339000000	21376000000	371650000	238160000	9060000000	3886700000	105920000	70509000	141780000	2044000000	3566900000	552260000	39020000	343210000	1441200000	1424700000
Myosin light polypeptide 6	MYL6	2392600000	2054100000	1413000000	1451800000	4888800000	456470000	757410000	1042000000	14069000000	10209000000	1046600000	553300000	7747600000	2175300000	228960000	260050000	61498000	1090800000	1699800000	911780000	162840000	778000000	1303600000	1054700000
Actin, cytoplasmic 2;Actin, cytoplasmic 2, N-terminally processed	ACTG1	97585000000	50047000000	18809000000	42254000000	101440000000	24301000000	16788000000	14765000000	204450000000	188750000000	2863200000	2401100000	154000000000	59771000000	995120000	1144700000	883060000	6906100000	13814000000	3478000000	487340000	3931500000	6863700000	5955800000
Tubulin beta-4A chain	TUBB4A	0	0	0	0	0	0	0	0	0	0	0	0	0	0	0	0	0	0	0	0	0	0	0	0
Dolichyl-diphosphooligosaccharide--protein glycosyltransferase subunit 2	RPN2	0	0	0	0	0	0	0	0	0	0	0	0	0	0	0	0	0	0	0	0	0	0	0	0
Glutathione S-transferase Mu 3	GSTM3	0	0	0	0	0	0	0	0	0	0	0	0	0	0	0	0	0	0	0	0	0	0	0	0
Protein disulfide-isomerase A3	PDIA3	0	0	0	0	0	0	0	0	0	0	0	0	0	0	0	0	0	0	0	0	0	0	0	0
60S ribosomal protein L27a	RPL27A	0	0	0	0	0	0	0	0	0	0	0	0	0	0	0	0	0	0	0	0	0	0	0	0
ADP-ribosylation factor 5;ADP-ribosylation factor 1;ADP-ribosylation factor 3	ARF5;ARF1;ARF3	0	0	0	0	0	0	0	0	0	0	0	0	0	0	0	0	0	0	0	0	0	0	0	0
40S ribosomal protein S13	RPS13	0	0	0	0	0	0	0	0	0	0	0	0	0	0	0	0	0	0	0	0	0	0	0	0
Baculoviral IAP repeat-containing protein 2	BIRC2	0	0	0	0	0	0	0	0	0	0	0	0	0	0	0	0	0	0	0	0	0	0	0	0
Laminin subunit beta-3	LAMB3	0	0	0	0	0	0	0	0	0	0	0	0	0	0	0	0	0	0	0	0	0	0	0	0
Caprin-1	CAPRIN1	0	0	0	0	0	0	0	0	0	0	0	0	0	0	0	0	0	0	0	0	0	0	0	0
Plectin	PLEC	0	0	0	0	0	0	0	0	0	0	0	0	0	0	0	0	0	0	0	0	0	0	0	0
Girdin	CCDC88A	0	0	0	0	0	0	0	0	0	0	0	0	0	0	0	0	0	0	0	0	0	0	0	0
DCC-interacting protein 13-beta	APPL2	0	0	0	0	0	0	0	0	0	0	0	0	0	0	0	0	0	0	0	0	0	0	0	0
Exosome complex component RRP43	EXOSC8	0	0	0	0	0	0	0	0	0	0	0	0	0	0	0	0	0	0	0	0	0	0	0	0
3-hydroxyacyl-CoA dehydrogenase type-2	HSD17B10	0	0	0	0	0	0	0	0	0	0	0	0	0	0	0	0	0	0	0	0	0	0	0	0
Protein LSM14 homolog B	LSM14B	0	0	0	0	0	0	0	0	0	0	0	0	0	0	0	0	0	0	0	0	0	0	0	0
E3 ubiquitin-protein ligase Praja-2	PJA2	0	0	0	0	0	0	0	0	1546100	0	0	0	0	0	0	0	0	0	0	0	0	0	0	0
Tropomodulin-2	TMOD2	0	0	0	0	0	0	0	0	18157000	0	0	0	0	0	0	0	0	0	0	0	0	0	0	0
Centrosomal protein of 290 kDa	CEP290	3443100	0	0	0	0	0	0	0	0	0	0	0	0	0	0	0	0	0	0	0	0	0	0	0
POTE ankyrin domain family member J	POTEJ	9186800	0	19609000	0	0	0	0	0	14285000	0	0	0	0	0	0	0	0	0	0	0	0	0	0	0
BMP-2-inducible protein kinase	BMP2K	0	0	0	0	0	0	0	0	21058000	0	0	0	13744000	0	0	0	0	0	0	0	0	0	0	0
ATP-dependent 6-phosphofructokinase, platelet type;ATP-dependent 6-phosphofructokinase, liver type	PFKP;PFKL	0	0	0	0	0	0	0	0	0	0	0	0	17757000	0	0	0	0	0	0	0	0	0	0	0
Caldesmon	CALD1	0	0	0	0	0	0	0	0	0	0	0	0	18323000	0	0	0	0	0	0	0	0	0	0	0
Zyxin	ZYX	1379900	0	0	0	0	0	0	0	0	0	0	0	0	0	0	0	1465500	0	0	0	0	0	0	0
26S proteasome non-ATPase regulatory subunit 7	PSMD7	0	0	0	0	0	0	0	0	0	0	0	0	0	0	0	0	4060800	0	0	0	0	0	0	0
Transcription factor E2F7	E2F7	0	0	0	0	0	0	0	0	0	0	0	0	0	0	0	0	11708000	0	0	0	0	0	0	0
Non-POU domain-containing octamer-binding protein	NONO	0	0	0	0	0	0	0	0	0	0	0	0	0	0	0	0	17072000	0	0	0	6502200	0	0	0
Rho GTPase-activating protein 22	ARHGAP22	8717100	8927600	0	0	0	0	0	0	0	0	0	0	0	0	0	0	6899100	0	0	0	8500200	0	0	0
Electron transfer flavoprotein subunit alpha, mitochondrial	ETFA	0	21954000	0	0	0	0	0	9508500	24595000	0	0	0	0	0	0	0	0	0	0	0	0	0	0	0
60S ribosomal protein L28	RPL28	0	0	4485600	0	1688500	176770	0	0	33313000	0	0	0	0	0	0	0	0	0	0	0	0	0	0	0
Serine/threonine-protein phosphatase PGAM5, mitochondrial	PGAM5	0	0	0	0	0	1141300	0	0	0	0	0	0	10145000	0	0	0	0	0	0	0	0	0	0	0
Putative SAGE1-like protein		0	0	0	0	0	0	0	0	0	0	0	12297000000	0	0	0	0	0	0	0	0	0	0	0	0
ER lumen protein-retaining receptor 2	KDELR2	0	0	0	0	0	0	0	0	0	3071700	0	0	0	0	0	0	0	0	0	0	0	0	0	0
Protein EFR3 homolog A	EFR3A	0	0	0	0	0	0	0	0	0	3587200	0	0	0	0	0	0	0	0	0	0	0	0	0	0
Inverted formin-2	INF2	0	0	0	0	0	0	0	0	6250500	6706900	0	0	4197100	0	0	0	0	0	0	0	0	0	0	0
AP-2 complex subunit sigma	AP2S1	0	0	0	0	0	0	0	0	0	7712800	0	0	0	0	0	0	0	0	0	0	0	0	0	0
D-3-phosphoglycerate dehydrogenase	PHGDH	0	0	0	0	6148900	0	0	0	15667000	9445900	0	0	5179200	0	0	0	0	0	0	0	0	0	0	0
Protein SGT1	ECD	0	0	0	0	0	0	0	0	31898000	9899000	0	0	0	0	0	0	0	0	0	0	0	0	0	0
Neuron-specific calcium-binding protein hippocalcin;Neurocalcin-delta;Hippocalcin-like protein 1	HPCA;NCALD;HPCAL1	0	0	0	0	0	0	0	0	10766000	10025000	0	0	0	0	0	0	0	0	0	0	0	0	0	0
ADP/ATP translocase 3;ADP/ATP translocase 3, N-terminally processed	SLC25A6	0	0	0	0	0	0	0	0	15975000	10234000	0	0	0	0	0	0	0	0	0	0	0	0	0	0
V-type proton ATPase 116 kDa subunit a isoform 1	ATP6V0A1	0	0	0	0	0	0	0	0	0	10305000	0	0	0	0	0	0	0	0	0	0	0	0	0	0
AP-1 complex subunit beta-1	AP1B1	0	0	0	0	0	0	0	0	26317000	10479000	0	0	0	0	0	0	0	0	0	0	0	0	0	0
Flotillin-1	FLOT1	0	0	0	0	0	0	0	0	16231000	10599000	0	0	0	0	0	0	0	0	0	0	0	0	0	0
Tight junction protein ZO-2	TJP2	0	0	0	0	0	0	0	0	18607000	11492000	0	0	7406500	0	0	0	0	0	0	0	0	0	0	0
60S ribosomal protein L18a	RPL18A	0	0	0	0	0	0	0	0	8370500	13476000	0	0	0	0	0	0	0	0	0	0	0	0	0	0
Protein-methionine sulfoxide oxidase MICAL3	MICAL3	0	0	0	0	0	0	0	0	0	14903000	0	0	0	0	0	0	0	0	0	0	0	0	0	0
Ras-related protein R-Ras2	RRAS2	5038000	0	0	0	8690500	298140	0	0	44714000	16302000	0	0	16469000	0	0	0	0	0	0	0	0	0	0	0
40S ribosomal protein S5;40S ribosomal protein S5, N-terminally processed	RPS5	0	0	0	0	0	0	0	0	15788000	16745000	0	0	0	0	0	0	0	0	0	0	0	0	0	0
40S ribosomal protein S16	RPS16	0	0	0	0	0	0	0	0	15788000	17387000	0	0	11204000	0	0	0	0	0	0	0	0	0	0	0
Importin-5	IPO5	28668000	0	8794200	9569200	0	0	0	0	29945000	19577000	0	0	24946000	0	0	0	0	0	0	0	0	0	0	0
A-kinase anchor protein 2	AKAP2	0	10157000	20087000	16451000	9326200	0	16293000	0	118870000	19732000	3574800	4721300	25440000	0	0	0	0	0	0	0	0	0	0	0
Actin filament-associated protein 1	AFAP1	0	0	0	0	0	0	0	0	23657000	21215000	0	0	0	0	0	0	0	0	0	0	0	0	0	0
AP-2 complex subunit mu	AP2M1	0	0	0	0	0	0	0	0	15834000	23641000	0	0	0	0	0	0	0	0	0	0	0	0	0	0
Junction plakoglobin	JUP	0	0	0	0	0	0	0	0	25122000	23766000	0	0	12289000	0	0	0	0	0	0	0	0	0	0	0
Myosin regulatory light polypeptide 9	MYL9	0	0	0	0	0	0	0	0	14997000	25245000	0	0	0	0	0	0	0	0	0	0	0	0	0	0
Alpha-actinin-4	ACTN4	0	0	0	0	3334000	0	0	0	16118000	25747000	0	0	6630900	0	0	0	0	0	0	0	0	0	0	0
Importin-9	IPO9	0	0	0	0	0	0	0	0	37201000	27023000	0	0	0	0	0	0	0	0	0	0	0	0	0	0
Filamin-C	FLNC	0	0	0	0	0	0	0	0	0	27119000	0	0	0	0	0	0	0	0	0	0	0	0	0	0
Supervillin	SVIL	0	0	0	0	0	171990	0	0	36911000	37055000	0	0	3290900	0	0	0	0	0	0	0	0	0	0	0
CD59 glycoprotein	CD59	50885000	30724000	0	0	77381000	655570	0	0	142500000	38707000	0	0	35262000	0	0	0	0	0	0	0	0	0	0	0
Melanotransferrin	MFI2	11832000	0	0	0	0	910450	0	0	22538000	40549000	0	0	11982000	0	0	0	0	0	0	0	0	0	0	0
Fragile X mental retardation syndrome-related protein 1	FXR1	0	0	0	0	0	0	0	0	25926000	41070000	0	0	19507000	0	0	0	0	0	0	0	0	0	0	0
Unconventional myosin-Va	MYO5A	0	0	0	0	0	0	0	0	6265000	41814000	0	0	0	0	0	0	0	0	0	0	0	0	0	0
Lactadherin;Lactadherin short form;Medin	MFGE8	0	0	0	0	0	0	0	0	43331000	42577000	0	0	21754000	0	0	0	0	0	0	0	0	0	0	0
60S ribosomal protein L21	RPL21	0	0	0	0	0	0	0	0	27911000	55812000	0	0	0	0	0	0	0	0	0	0	0	0	0	0
Guanine nucleotide-binding protein G(I)/G(S)/G(T) subunit beta-1	GNB1	14975000	0	0	0	4557000	0	0	0	64061000	57339000	0	0	0	0	0	0	0	0	0	0	0	0	0	0
Phostensin	PPP1R18	0	0	0	0	0	0	0	0	102380000	75558000	0	0	0	0	0	0	0	0	0	0	0	0	0	0
F-actin-capping protein subunit beta	CAPZB	16397000	0	0	6909300	32544000	0	0	0	40582000	79785000	0	0	24236000	0	0	0	0	0	0	0	0	0	0	0
Guanine nucleotide-binding protein G(k) subunit alpha	GNAI3	30651000	11675000	0	0	11839000	0	0	0	88977000	87603000	0	0	31799000	0	0	0	0	0	0	0	0	0	0	0
Allograft inflammatory factor 1-like	AIF1L	2389900	0	0	0	7585800	2621500	0	0	190070000	125360000	0	0	33364000	0	0	0	0	0	0	0	0	0	0	0
Clathrin interactor 1	CLINT1	19051000	0	0	0	4500800	1099700	0	0	152160000	162850000	0	0	46194000	0	0	0	0	0	0	0	0	0	0	0
C2 domain-containing protein 3	C2CD3	16244000	22256000	23781000	9107800	22744000	0	0	26050000	45626000	16349000	36025000	31623000	30789000	0	0	24473000	0	0	0	0	0	0	0	0
Haptoglobin-related protein;Haptoglobin;Haptoglobin alpha chain;Haptoglobin beta chain	HPR;HP	0	0	0	0	6543000	0	5118800	0	0	0	0	0	0	0	2635100	5066700	0	0	0	0	0	0	0	0
TGF-beta-activated kinase 1 and MAP3K7-binding protein 2	TAB2	0	0	0	0	3896700	319290	3748300	0	10126000	3629100	0	0	8993200	0	2967100	2919600	0	0	0	0	1064500	0	0	0
Probable ATP-dependent RNA helicase DDX5;Probable ATP-dependent RNA helicase DDX17	DDX5;DDX17	29443000	47042000	36988000	32749000	0	0	0	0	20117000	37131000	0	0	71052000	0	8193800	13014000	7733100	0	0	0	5885300	0	0	0
Progesterone-induced-blocking factor 1	PIBF1	6385000	0	11515000	0	0	0	0	0	23877000	23245000	0	0	20902000	0	22314000	19439000	0	0	0	0	0	0	0	0
Titin	TTN	0	0	8986300	7732300	0	0	0	0	0	10371000	0	0	237520000	0	148910000	0	0	0	0	0	0	0	0	0
Prolyl 4-hydroxylase subunit alpha-2	P4HA2	8149900	0	0	0	0	0	0	0	6853300	17337000	0	0	0	1009600	0	0	0	0	0	0	0	0	0	0
Cytospin-A	SPECC1L	0	0	0	0	0	0	0	0	174320000	44001000	0	0	14294000	2668200	1560500	0	0	0	0	0	0	0	0	0
Eukaryotic translation initiation factor 3 subunit F	EIF3F	8440500	0	5095500	4743100	4852600	0	0	0	0	5511900	0	0	0	3268900	1399800	0	0	0	0	0	0	0	0	0
NEDD4 family-interacting protein 1	NDFIP1	0	5359700	0	0	0	0	0	0	11780000	13634000	0	0	9085100	3874400	0	0	0	0	0	0	0	0	0	0
Phosphoprotein associated with glycosphingolipid-enriched microdomains 1	PAG1	2793200	0	0	0	0	0	0	0	12869000	17059000	0	0	13362000	3888000	0	0	0	0	0	0	0	0	0	0
Unconventional myosin-Id	MYO1D	0	0	0	0	0	0	0	0	88070000	52940000	0	0	7353000	4180300	0	0	0	0	0	0	0	0	0	0
Eukaryotic translation initiation factor 5B	EIF5B	0	0	0	0	59874000	206680000	0	0	8962300	4700300	0	0	131530000	4191800	0	0	0	0	0	0	0	0	0	0
BAG family molecular chaperone regulator 2	BAG2	0	0	0	0	12995000	0	0	0	60568000	70796000	0	0	22315000	4533300	0	0	0	0	0	0	0	0	0	0
RNA-binding protein FUS	FUS	8120000	0	4575800	0	0	704830	0	1297400	31579000	35648000	0	0	55235000	4950100	0	0	1490800	0	0	0	0	0	0	0
Leucine-rich repeat and calponin homology domain-containing protein 3	LRCH3	0	8319800	0	0	0	0	0	0	14658000	48877000	0	0	9808200	5936400	0	0	0	0	0	0	0	0	0	0
AP-2 complex subunit alpha-1	AP2A1	40025000	9231700	0	3558200	11960000	0	0	0	480320000	555160000	0	0	97762000	6563500	0	0	0	0	0	0	0	0	0	0
EF-hand domain-containing protein D1	EFHD1	0	0	0	0	14025000	0	0	0	52916000	75971000	0	0	10971000	6622100	0	0	0	0	0	0	0	0	0	0
40S ribosomal protein S14	RPS14	0	0	0	0	0	0	0	3614400	0	7316600	0	0	0	7492600	0	0	0	0	0	0	0	0	0	0
14-3-3 protein gamma;14-3-3 protein gamma, N-terminally processed	YWHAG	0	0	0	0	0	0	0	0	0	8565300	0	0	14929000	8176100	0	0	0	0	0	0	0	0	0	0
Protein phosphatase 1G	PPM1G	0	0	0	0	0	0	0	0	34853000	31155000	0	0	0	8238700	6127600	0	6283900	0	0	0	0	0	0	0
60S ribosomal protein L6	RPL6	0	0	0	0	0	0	0	0	37958000	261200000	0	0	73177000	8679300	1424400	4087700	0	0	0	0	0	0	0	0
LIM and calponin homology domains-containing protein 1	LIMCH1	51482000	29768000	33546000	25232000	6276300	319840	0	0	542740000	284850000	0	0	176990000	8728600	0	0	0	0	0	0	2644500	0	0	0
Calreticulin	CALR	0	0	11102000	0	0	0	0	0	0	0	0	0	20332000	9361800	645000	0	0	0	0	0	0	0	0	0
Uveal autoantigen with coiled-coil domains and ankyrin repeats	UACA	0	0	0	0	2539100	0	0	0	260440000	27294000	0	0	103560000	9547400	0	0	0	0	0	0	0	0	0	0
Clathrin light chain A	CLTA	74133000	9440900	0	0	0	5770300	13820000	0	271350000	251570000	0	0	107140000	11510000	0	0	0	0	0	0	0	0	0	0
PRKC apoptosis WT1 regulator protein	PAWR	24191000	10040000	0	0	37530000	1040300	0	0	300740000	368460000	0	0	40915000	14930000	0	0	0	0	0	0	0	0	0	0
Importin subunit beta-1	KPNB1	50748000	7377100	0	5053800	24622000	451760	0	0	101250000	164450000	0	0	50146000	15920000	0	0	0	0	0	0	0	0	0	0
60S ribosomal protein L15	RPL15	0	0	0	0	0	0	0	0	6588200	84880000	0	0	17614000	15974000	0	0	0	0	0	0	0	0	0	0
Membrane-spanning 4-domains subfamily A member 10	MS4A10	75534000	68938000	55587000	63707000	32135000	14458000	104570000	72957000	0	16880000	31170000	47074000	21070000	18699000	30517000	23134000	0	0	0	0	0	0	0	0
AP-2 complex subunit beta	AP2B1	19440000	0	0	0	38787000	0	0	0	641730000	518030000	0	0	195940000	21389000	0	0	0	0	0	0	0	0	0	0
Protein phosphatase 1 regulatory subunit 12A	PPP1R12A	6506500	0	0	0	23696000	0	0	0	350960000	159110000	0	0	172280000	21616000	0	0	0	0	0	0	0	0	0	0
Tubulin alpha-1C chain;Tubulin alpha-8 chain	TUBA1C;TUBA8	0	0	0	31010000	29613000	0	0	0	72518000	43246000	16047000	0	52019000	23228000	0	0	18000000	0	0	0	0	0	0	0
Beta-actin-like protein 2	ACTBL2	137710000	0	0	0	0	20420000	0	0	139730000	43878000000	0	0	0	25340000	0	0	0	0	0	0	0	0	0	0
Myosin regulatory light chain 12A	MYL12A	0	0	0	0	0	0	0	0	119920000	113210000	0	0	35476000	28635000	0	0	0	0	0	0	0	0	0	0
Serine/threonine-protein phosphatase PP1-alpha catalytic subunit;Serine/threonine-protein phosphatase PP1-gamma catalytic subunit	PPP1CA;PPP1CC	10931000	0	0	5997400	3823000	339950	0	0	372850000	302500000	0	0	133490000	35463000	0	0	0	0	0	0	0	0	0	0
Hydrocephalus-inducing protein homolog	HYDIN	0	0	0	0	0	0	0	0	36816000	28574000	19545000	0	0	37111000	0	13701000	0	0	0	0	0	0	0	0
Ornithine aminotransferase, mitochondrial;Ornithine aminotransferase, hepatic form;Ornithine aminotransferase, renal form	OAT	81619000	50974000	38337000	86724000	63489000	7277000	28839000	16320000	15774000	20663000	8696800	0	23777000	37210000	15378000	0	25914000	0	0	0	14071000	0	0	0
Leucine zipper protein 1	LUZP1	0	0	3107300	0	9307200	1496900	0	0	448350000	433070000	0	0	233360000	37398000	0	0	0	0	0	0	0	0	0	0
60S ribosomal protein L30	RPL30	27957000	19036000	12558000	16712000	50529000	2422900	0	23560000	236660000	206920000	0	16207000	112920000	38851000	0	17202000	0	0	0	0	0	0	0	0
Nuclear pore complex protein Nup93	NUP93	0	94557000	94318000	61740000	93612000	11683000	72047000	63137000	40249000	25353000	48008000	29656000	56555000	41706000	38637000	33239000	0	0	0	0	0	0	0	0
Thioredoxin	TXN	0	0	0	0	0	0	0	0	0	0	0	0	0	53554000	38657000	42574000	0	0	0	0	0	0	0	0
5-nucleotidase	NT5E	574960000	180990000	0	15665000	579170000	70047000	15309000	0	1909700000	1869400000	0	0	717410000	96623000	0	0	0	0	0	0	0	0	0	0
Actin, cytoplasmic 1;Actin, cytoplasmic 1, N-terminally processed	ACTB	246670000	83825000	0	65570000	355380000	78369000	0	0	1033000000	776010000	0	0	564130000	370000000	0	0	0	0	0	0	0	0	0	0
Spectrin beta chain, non-erythrocytic 1	SPTBN1	2342400	7187500	0	0	0	857470	0	0	9286100	177570000	0	0	16752000	0	0	0	0	0	0	1239500	0	0	0	0
Zinc finger protein RFP	TRIM27	0	0	0	0	0	0	0	0	0	0	0	0	0	0	0	0	3074600	0	0	3696200	0	0	0	0
40S ribosomal protein S10	RPS10	0	0	0	0	0	0	0	0	0	0	0	0	7797300	0	0	0	0	0	0	8362500	0	0	0	0
Constitutive coactivator of PPAR-gamma-like protein 1	FAM120A	2545100	218250000	6561700	0	0	0	186970000	276330000	106340000	95305000	115020000	109210000	0	0	0	164460000	22975000	408150	0	0	32060000	0	0	0
General transcription factor IIF subunit 1	GTF2F1	3685800	0	0	0	1654700	0	1860000	0	0	0	0	0	3286900	3407900	0	0	868730	616740	0	0	0	0	0	0
Annexin A6	ANXA6	3695000	41047000	0	0	0	132290	0	0	0	0	0	0	8451500	1625200	0	0	326590	637230	0	751440	0	0	0	0
Death-associated protein kinase 3	DAPK3	0	0	0	0	4555600	0	0	0	39485000	42552000	0	0	0	5685700	0	0	0	1226400	0	0	0	0	0	0
Ubiquitin carboxyl-terminal hydrolase 15	USP15	0	0	0	0	0	0	0	0	0	0	0	0	0	0	0	0	0	1876800	0	4534200	0	0	0	0
Importin-8	IPO8	0	0	0	0	0	0	0	0	0	0	0	0	0	0	0	0	4521300	1968800	0	0	0	0	0	0
ATP-dependent RNA helicase DDX3X	DDX3X	0	0	0	4180900	4487900	0	0	0	36066000	30346000	7516500	3900300	20019000	4195000	0	0	0	3517100	0	0	0	0	0	0
60S ribosomal protein L7a	RPL7A	7350100	16560000	9509900	0	8363500	1570600	9357100	18556000	131350000	185210000	0	0	82363000	40792000	0	0	0	3574400	0	0	0	0	0	0
Protein arginine N-methyltransferase 1	PRMT1	5704300	0	0	0	0	0	0	0	0	0	0	0	14261000	0	0	0	4583200	4105600	3869600	0	0	0	0	0
TOM1-like protein 2	TOM1L2	0	0	8341900	0	13079000	0	0	0	275400000	217760000	0	0	61639000	16967000	7343000	0	0	4243700	0	5439500	0	0	0	0
60S ribosomal protein L14	RPL14	15560000	0	0	12089000	0	0	0	8731400	77277000	114850000	18565000	16044000	59255000	33939000	13958000	7870000	0	6696000	0	8296000	0	0	0	0
Protein S100-A10	S100A10	0	0	9369000	0	37835000	0	0	0	47777000	58296000	0	0	23197000	0	0	0	0	9788700	0	0	0	0	0	0
60S ribosomal protein L3	RPL3	17501000	16216000	11931000	6862800	0	1409000	10597000	0	70750000	95333000	6338700	5948600	40816000	21611000	0	0	5920200	10293000	0	0	0	0	0	0
Erlin-2;Erlin-1	ERLIN2;ERLIN1	13497000	0	0	0	0	0	0	0	0	0	0	0	6299400	0	0	0	4744200	12931000	1891200	11120000	8751100	0	0	0
Fructose-bisphosphate aldolase A	ALDOA	13113000	0	5752800	0	0	2939400	12850000	0	8510700	8497400	0	0	10575000	0	0	0	0	0	0	0	0	0	0	5914600
Polypyrimidine tract-binding protein 1	PTBP1	0	0	0	0	0	0	0	0	0	0	0	0	0	0	0	0	0	0	0	0	0	0	0	6227700
Filamin-A	FLNA	0	0	0	0	0	13770000	1924400	6663100	65079000	785030000	0	743260	24261000	12139000	0	0	0	0	0	3766300	0	0	0	7943400
Mitochondrial 2-oxoglutarate/malate carrier protein	SLC25A11	7847900	0	0	0	10404000	0	10653000	0	11871000	0	0	5734300	9806500	0	0	0	0	3939600	5621800	0	0	0	0	7962200
Rab GDP dissociation inhibitor beta	GDI2	0	0	0	0	0	0	0	0	0	0	0	0	0	6560300	0	0	0	0	6924000	4518600	0	0	0	11650000
26S proteasome non-ATPase regulatory subunit 6	PSMD6	6632600	0	0	17363000	13068000	0	0	0	11238000	5907300	0	0	0	0	0	0	0	9315700	0	0	0	0	0	13322000
Sequestosome-1	SQSTM1	0	29392000	0	15965000	0	0	0	18782000	287350000	235900000	46535000	18885000	127940000	59458000	20372000	4983800	0	0	5618700	6503700	0	0	0	14642000
V-type proton ATPase 16 kDa proteolipid subunit	ATP6V0C	17104000	12201000	0	6040600	35834000	0	0	0	96644000	94352000	0	12072000	18359000	0	0	0	0	0	8419600	8357100	0	0	0	16041000
Complement component 1 Q subcomponent-binding protein, mitochondrial	C1QBP	0	0	22830000	21670000	0	0	0	0	11570000	7622600	0	0	0	0	0	0	3583900	7882400	17208000	29810000	15481000	0	0	17191000
40S ribosomal protein S7	RPS7	0	0	0	0	6546100	0	0	0	2548700	0	6263100	0	7330400	4747300	5026600	0	0	24599000	5992000	3535200	0	0	0	18814000
Annexin A1	ANXA1	24782000	0	20222000	45731000	0	0	0	0	0	0	0	0	13237000	0	0	0	0	0	0	0	0	0	0	23350000
Eukaryotic initiation factor 4A-I;Eukaryotic initiation factor 4A-II	EIF4A1;EIF4A2	0	0	0	0	0	0	0	0	0	14163000	0	0	50570000	20465000	0	0	0	0	1806400	1207400	0	0	1617400	2680900
Ankycorbin	RAI14	101020000	20187000	0	2539100	128150000	17821000	0	0	1510600000	1568100000	0	0	532450000	94967000	0	0	0	2422300	2618300	0	0	0	1986700	2121800
Elongation factor 1-gamma	EEF1G	12491000	0	6830500	7666700	0	0	0	10749000	32330000	14721000	0	0	22162000	6223000	0	0	7124000	0	3195800	22926000	8552800	0	4274200	9188100
Alpha-actinin-1	ACTN1	55614000	24602000	28665000	24593000	7212800	0	4734500	11498000	341180000	286700000	0	0	76811000	36095000	0	0	1952700	0	2771000	0	0	0	4453600	16158000
Protein disulfide-isomerase	P4HB	33854000	0	0	0	5375100	17010000	39423000	9245700	110540000	99358000	18564000	27667000	105140000	19900000	7479900	0	3686400	6250300	0	10158000	0	0	4806800	31641000
Engulfment and cell motility protein 2;Engulfment and cell motility protein 1	ELMO2;ELMO1	0	0	0	0	0	0	0	0	0	0	0	0	0	0	0	0	6144500	0	5864000	0	0	0	4873000	4899100
Tryptophan--tRNA ligase, cytoplasmic;T1-TrpRS;T2-TrpRS	WARS	0	7594800	0	0	0	0	0	0	20274000	21237000	0	0	0	0	0	0	15302000	5097600	8040500	0	7867600	0	5566800	0
Phosphate carrier protein, mitochondrial	SLC25A3	13600000	0	6903100	9335000	32068000	0	32426000	0	43508000	27383000	11757000	0	25615000	10091000	0	0	1370200	10219000	0	19638000	2119000	0	6117100	6218300
Sterol O-acyltransferase 1	SOAT1	0	0	0	0	0	0	0	0	0	0	0	0	0	0	0	0	0	0	0	0	0	0	6745600	8481600
Guanine nucleotide-binding protein G(i) subunit alpha-2	GNAI2	364710000	78946000	319790000	199020000	101580000	35770000	218010000	148580000	1153900000	715630000	37669000	0	556520000	31369000	9046800	0	7822100	0	0	0	9712600	0	7118000	8100400
Endoplasmin	HSP90B1	14740000	0	0	8237200	0	749160	1802500	3500200	0	7458700	0	0	35710000	25149000	0	0	0	0	0	0	0	0	11559000	19066000
Tyrosine-protein kinase Yes;Tyrosine-protein kinase Lyn;Tyrosine-protein kinase HCK;Proto-oncogene tyrosine-protein kinase Src;Tyrosine-protein kinase Fyn	YES1;LYN;HCK;SRC;FYN	0	0	0	0	0	0	0	0	8479200	10278000	0	0	0	0	0	0	0	0	16009000	20101000	0	0	17251000	14907000
F-actin-capping protein subunit alpha-1	CAPZA1	27006000	0	0	4250500	46629000	0	0	0	183360000	181280000	0	0	84513000	15767000	0	4153000	7467300	7767800	10377000	0	9445500	0	19359000	25154000
U4/U6 small nuclear ribonucleoprotein Prp31	PRPF31	10512000	0	0	0	0	0	0	0	0	13183000	0	0	0	0	0	0	0	0	0	39525000	14823000	0	24803000	29691000
60S acidic ribosomal protein P0;60S acidic ribosomal protein P0-like	RPLP0;RPLP0P6	86582000	74620000	55200000	44112000	98063000	421030	19776000	57495000	382430000	462000000	7915400	8883700	217910000	146240000	15866000	7833500	16063000	33553000	24811000	13925000	2129700	0	33326000	22796000
Plasminogen activator inhibitor 1 RNA-binding protein	SERBP1	2583200	0	0	0	0	0	0	1276800	1565700	925250	730050	0	16443000	1659400	3232900	2232200	0	0	0	1661700	1872400	1358200	2198600	3387300
14-3-3 protein epsilon	YWHAE	0	0	0	23896000	0	0	0	0	0	0	0	0	0	0	0	0	0	0	0	0	0	1897800	0	0
Transcription initiation factor TFIID subunit 4	TAF4	0	0	10504000	7447700	0	0	0	0	0	0	0	0	0	0	0	0	5565200	0	1778000	4217000	0	2106600	3314200	5908300
Vesicle-associated membrane protein-associated protein A;Vesicle-associated membrane protein-associated protein B/C	VAPA;VAPB	2171300	1900400	1236700	1080500	0	0	0	0	0	0	0	0	0	0	0	0	0	1811300	972170	1343200	2554100	2163500	2921900	2794500
Probable ATP-dependent RNA helicase DDX20	DDX20	0	0	1620500	0	0	0	0	0	14721000	26005000	0	0	0	0	0	0	9131700	1818200	9616700	1592900	3099600	2493100	6896000	1951800
Glyceraldehyde-3-phosphate dehydrogenase	GAPDH	57045000	50021000	68641000	105670000	0	2738300	23622000	38842000	69390000	67337000	0	14770000	285780000	85061000	18346000	0	14047000	4740800	21969000	22817000	0	2509400	0	22832000
Complement C4-B;Complement C4 beta chain;Complement C4-B alpha chain;C4a anaphylatoxin;C4b-B;C4d-B;Complement C4 gamma chain;Complement C4-A;Complement C4 beta chain;Complement C4-A alpha chain;C4a anaphylatoxin;C4b-A;C4d-A;Complement C4 gamma chain	C4B;C4A	7120000	4129300	8528500	0	0	0	0	0	0	0	0	0	0	0	0	0	3798500	0	3203400	0	4072700	3315200	6477600	3611500
60S ribosomal protein L8	RPL8	0	0	28972000	21431000	0	3387400	17967000	1418100	147470000	37796000	24729000	35159000	136800000	0	0	0	4189900	15372000	7068900	9765500	5785000	4539100	9125500	9826200
Serine/threonine-protein kinase RIO1	RIOK1	18872000	0	0	0	0	0	0	0	0	0	0	0	0	8018100	0	0	0	0	0	0	0	5462500	0	0
SCY1-like protein 2	SCYL2	9353900	12139000	21799000	0	87153000	5587300	214510000	132930000	231650000	88475000	205770000	48037000	282940000	126050000	162180000	102200000	0	0	0	0	9310700	5698600	0	4173400
Transmembrane protein 43	TMEM43	0	0	16937000	0	0	0	0	0	0	0	0	0	0	0	0	0	0	0	0	0	0	6177400	0	0
ATP synthase subunit alpha, mitochondrial	ATP5A1	56188000	96374000	112210000	48041000	0	6519100	13901000	51858000	53544000	0	0	1692900	80459000	50464000	40039000	34541000	0	0	0	2116000	0	6855100	3974200	2333200
Drebrin	DBN1	775250000	51285000	252000000	283490000	54312000	0	37863000	56612000	890430000	649590000	0	0	405530000	46460000	0	0	15813000	0	6578700	0	0	6980600	0	0
60S ribosomal protein L19	RPL19	0	0	16863000	7875600	0	0	0	12933000	73902000	72575000	0	0	39736000	0	0	0	3927100	588910	0	0	0	7087500	0	540310
E3 ubiquitin-protein ligase TRIM21	TRIM21	1544800000	1648000000	1309400000	1781600000	629000000	45070000	596220000	589920000	806850000	504160000	283170000	280120000	773330000	438640000	238990000	240920000	3133400	0	5656700	5514600	5151400	7110500	0	12289000
Probable ATP-dependent RNA helicase DDX60-like	DDX60L	0	0	0	0	0	0	0	0	0	0	0	0	20919000	0	20586000	0	0	0	0	0	0	8142100	0	0
S-adenosylmethionine synthase isoform type-2	MAT2A	15743000	0	27190000	20688000	0	0	13576000	18696000	11164000	0	0	0	7476400	0	8383600	7255400	2994100	0	0	0	0	8536900	0	0
26S protease regulatory subunit 8	PSMC5	0	0	10248000	11385000	0	417030	0	0	0	0	0	0	0	0	0	0	16331000	11255000	6737500	9148700	0	9304400	12346000	9496100
40S ribosomal protein S27-like;40S ribosomal protein S27	RPS27L;RPS27	0	0	8478200	11149000	0	0	0	17597000	0	17699000	0	0	12314000	12171000	25411000	14843000	0	0	0	0	0	9541600	0	0
Lamina-associated polypeptide 2, isoform alpha;Thymopoietin;Thymopentin	TMPO	151970000	112650000	210840000	109670000	12858000	2827800	28177000	72802000	51741000	18232000	15392000	0	48363000	0	36853000	26571000	25451000	1945900	1512900	11116000	1659800	10376000	12790000	30463000
Polyadenylate-binding protein 1	PABPC1	22471000	34117000	14093000	16049000	0	0	0	16845000	67192000	47017000	0	0	19042000	0	0	0	0	0	0	0	0	10492000	6608400	0
Elongation factor 1-beta	EEF1B2	0	0	0	22044000	0	0	0	0	20535000	0	0	0	0	0	0	0	5584500	7681900	10215000	8407700	0	10504000	13616000	14876000
60S ribosomal protein L29	RPL29	0	0	78245000	0	0	0	0	0	29475000	76537000	0	9013400	27040000	0	0	19447000	0	36045000	24598000	39937000	94617000	11778000	37163000	13466000
RNA-binding protein 10	RBM10	74348000	8488100	70548000	22661000	0	2593000	0	22934000	0	0	0	0	9166600	2266000	1767400	0	78146000	25927000	3836800	0	26115000	12888000	15846000	19627000
60S acidic ribosomal protein P1	RPLP1	24401000	34442000	15595000	15362000	23921000	22206000	0	0	113100000	139190000	5904700	0	25298000	18457000	0	0	0	24931000	20108000	10095000	18130000	13312000	0	19739000
ADP/ATP translocase 2;ADP/ATP translocase 2, N-terminally processed;ADP/ATP translocase 1	SLC25A5;SLC25A4	0	74259000	69165000	37222000	99764000	7171300	12401000	48388000	111920000	63894000	88745000	27877000	92916000	15755000	8780300	0	0	10457000	20731000	17639000	0	14094000	17183000	27869000
26S proteasome non-ATPase regulatory subunit 11	PSMD11	6350100	0	0	7827100	0	0	0	0	0	0	0	0	4165500	0	0	0	16321000	14428000	3473000	0	4384900	14335000	9489200	10989000
60S ribosomal protein L12	RPL12	17801000	20747000	12719000	0	28499000	2758800	0	13874000	125960000	219110000	0	0	58081000	0	0	5442800	0	13319000	16838000	14834000	0	14870000	0	11815000
Caveolin-2	CAV2	0	53539000	84544000	63790000	0	0	27659000	26638000	0	0	0	0	0	0	0	0	7138800	19522000	15230000	22082000	0	15249000	25097000	34375000
Filamin-B	FLNB	0	152060000	13775000	61852000	799190	1328600	0	0	238370000	1039100000	40118000	40349000	58175000	41242000	27888000	15501000	0	47038000	25743000	5801100	26289000	15798000	47278000	0
Carbonyl reductase [NADPH] 1;Carbonyl reductase [NADPH] 3	CBR1;CBR3	0	0	0	0	0	0	0	0	0	0	0	0	0	0	0	0	13802000	6858800	7754100	0	16825000	16533000	0	8589700
Alpha-enolase	ENO1	131930000	107400000	126460000	184390000	0	7250300	45136000	19114000	66820000	28420000	47255000	1699100	137450000	9295000	4158600	26884000	13346000	16584000	36818000	41532000	0	17438000	19099000	114420000
Fibrinogen gamma chain	FGG	100600000	171790000	169690000	130160000	184060000	17619000	105270000	96036000	28423000	0	28679000	11934000	72753000	0	14463000	57314000	25681000	0	0	19226000	29754000	18017000	19108000	17756000
14-3-3 protein theta	YWHAQ	73578000	31620000	35571000	19245000	20679000	1410700	12698000	12731000	166740000	77273000	0	10699000	51150000	5737000	0	0	1895200	0	19430000	5791300	8389400	18252000	13384000	26468000
26S proteasome non-ATPase regulatory subunit 4	PSMD4	45698000	49381000	88458000	108220000	49251000	382630	51099000	44762000	50018000	20681000	106370	3518300	109260000	67026000	88308000	69418000	19621000	1509800	59207000	2141200	0	18859000	22207000	57045000
Glutathione S-transferase P	GSTP1	30796000	0	22976000	24290000	17612000	0	0	0	29586000	25013000	0	0	19043000	0	0	0	0	11186000	15555000	15816000	8375800	20427000	15777000	18244000
60S acidic ribosomal protein P2	RPLP2	52115000	38638000	44865000	29814000	0	6939200	35285000	40043000	96365000	211230000	0	0	30807000	58218000	7267600	0	0	9338700	8107900	0	0	21069000	5328200	7830900
Cofilin-1	CFL1	60416000	46085000	66459000	107180000	11508000	3524500	14387000	30639000	15329000	47002000	0	0	34027000	0	9255200	7250200	0	0	10084000	9397400	0	27017000	14509000	0
Histone-binding protein RBBP7;Histone-binding protein RBBP4	RBBP7;RBBP4	0	0	0	0	33811000	176360	69269000	50955000	54851000	51350000	57221000	18239000	24402000	16643000	11261000	8592500	0	37837000	51919000	27973000	0	27140000	50106000	53944000
Carboxymethylenebutenolidase homolog	CMBL	43799000	18023000	34821000	35655000	0	0	0	0	0	0	0	0	0	0	0	0	20003000	10384000	3882000	1054000	57991000	28190000	23745000	1836400
Ras GTPase-activating protein-binding protein 1	G3BP1	13868000	24627000	0	13618000	0	530070	0	5583900	0	0	0	0	9518800	0	6759300	0	16484000	17260000	18323000	0	0	28696000	13371000	18434000
Protein-glutamine gamma-glutamyltransferase 2	TGM2	33000000	21615000	24204000	20184000	6096000	3258500	33802000	14609000	29176000	0	6259100	0	43615000	0	12460000	0	37010000	11101000	34386000	26883000	5064000	29635000	19356000	37538000
Heat shock protein HSP 90-alpha	HSP90AA1	111640000	28988000	80919000	128610000	30289000	6150200	62456000	44718000	104830000	151860000	36777000	17887000	266250000	58910000	0	17612000	44905000	28809000	57527000	26697000	12383000	30225000	59298000	144830000
Programmed cell death protein 6	PDCD6	34554000	28473000	50312000	43514000	0	2077300	8413800	12412000	50978000	27563000	0	0	21821000	21646000	14532000	9256600	0	10115000	0	0	16292000	31388000	22228000	12523000
Spindlin-1	SPIN1	197800000	151820000	123340000	172880000	0	1930800	20347000	17856000	12431000	7075600	0	3725900	40451000	0	0	6026900	45534000	17159000	12148000	15390000	130270000	31586000	40568000	34531000
Myosin light chain 1/3, skeletal muscle isoform;Myosin light chain 3	MYL1;MYL3	138860000	155530000	0	0	69495000	6871900	0	0	767460000	491900000	0	31685000	534270000	0	0	0	0	68742000	89904000	26421000	0	31639000	30140000	38620000
Peptidyl-prolyl cis-trans isomerase A;Peptidyl-prolyl cis-trans isomerase A, N-terminally processed	PPIA	77141000	29473000	64425000	36789000	0	4984000	15577000	23646000	24725000	59034000	16522000	0	89967000	59828000	0	0	0	17644000	29841000	44278000	25990000	31945000	31569000	42461000
Coordinator of PRMT5 and differentiation stimulator	COPRS	104720000	27961000	24342000	18277000	0	1887100	7783500	11569000	7897300	11901000	0	0	27622000	29999000	10563000	6318400	4934800	10911000	0	0	0	32910000	34587000	28413000
Uncharacterized protein C11orf84	C11orf84	142440000	169330000	262510000	197160000	0	0	5007000	7365100	49561000	26759000	19981000	0	18816000	14638000	38455000	6192500	583170000	36367000	33204000	42549000	289250000	33445000	25015000	67602000
Clathrin heavy chain 1	CLTC	225910000	30419000	18264000	13309000	25931000	53433000	21075000	10623000	4957100000	2515600000	10114000	4467900	2077500000	123150000	0	6720400	4773400	16387000	5933400	15406000	0	35147000	11503000	39599000
Pyruvate kinase PKM	PKM	86878000	51225000	76093000	60359000	5219300	962790	40868000	33497000	37603000	25714000	13253000	6401700	120950000	14603000	22670000	14409000	20937000	21862000	22836000	35674000	5626900	42384000	21563000	85316000
Zinc finger and BTB domain-containing protein 14	ZBTB14	37831000	28228000	46668000	40447000	16140000	7561800	54251000	0	0	0	0	0	0	0	0	20022000	10867000	44338000	29916000	26152000	26094000	44908000	27316000	30569000
Ankyrin repeat and FYVE domain-containing protein 1	ANKFY1	0	9090400	0	0	0	0	0	0	0	82097000	0	0	0	0	0	0	22678000	40020000	52115000	7059500	15564000	46317000	10757000	47341000
Heat shock 70 kDa protein 6;Putative heat shock 70 kDa protein 7	HSPA6;HSPA7	268460000	171420000	61630000	152700000	173550000	4071800	265090000	0	116460000	78926000	58315000	81284000	281890000	9689700	0	12686000	55052000	25558000	34190000	31626000	15553000	50498000	29926000	46680000
6-phosphofructo-2-kinase/fructose-2,6-bisphosphatase 2;6-phosphofructo-2-kinase;Fructose-2,6-bisphosphatase	PFKFB2	11959000	12482000	56426000	78127000	26881000	599380	39134000	72593000	12929000	29038000	23853000	10170000	11116000	24402000	8163500	0	2986000	17012000	17337000	7668000	0	51753000	27876000	48537000
26S protease regulatory subunit 6B	PSMC4	22326000	0	69991000	38916000	0	0	13290000	19705000	26370000	5952500	4801900	0	16929000	2684500	0	5680600	95969000	65092000	44139000	71055000	30563000	57233000	72879000	67365000
Heterogeneous nuclear ribonucleoprotein K	HNRNPK	161230000	135530000	115590000	133840000	48172000	2063200	33549000	13134000	25404000	38528000	0	0	64207000	43980000	18552000	5164700	139720000	71605000	46154000	80362000	85241000	60781000	60971000	69658000
Ubiquitin-60S ribosomal protein L40;Ubiquitin;60S ribosomal protein L40;Ubiquitin-40S ribosomal protein S27a;Ubiquitin;40S ribosomal protein S27a;Polyubiquitin-B;Ubiquitin;Polyubiquitin-C;Ubiquitin	UBA52;RPS27A;UBB;UBC	373910000	206960000	215920000	215120000	196290000	53200000	220700000	213230000	1394400000	1473000000	108470000	25915000	831960000	361230000	77295000	50000000	60092000	111310000	127110000	114250000	54406000	63829000	95897000	85460000
60S ribosomal protein L38	RPL38	96322000	115450000	125700000	87318000	12522000	3970100	101440000	104250000	84837000	68260000	74659000	0	40149000	15764000	10639000	91331000	4137600	14899000	19002000	0	69685000	65692000	46205000	31178000
Histone H2B type 1-L;Histone H2B type 1-M;Histone H2B type 1-N;Histone H2B type 1-H;Histone H2B type 3-B;Histone H2B type 2-F;Histone H2B type 2-E;Histone H2B type 1-C/E/F/G/I;Histone H2B type 1-D;Histone H2B type F-S;Histone H2B type 1-B;Histone H2B type 1-O;Histone H2B type 1-J;Histone H2B type 1-K;Histone H2B type 1-A	HIST1H2BL;HIST1H2BM;HIST1H2BN;HIST1H2BH;HIST3H2BB;HIST2H2BF;HIST2H2BE;HIST1H2BC;HIST1H2BD;H2BFS;HIST1H2BB;HIST1H2BO;HIST1H2BJ;HIST1H2BK;HIST1H2BA	36878000	47539000	50433000	39473000	76005000	7234100	32825000	47647000	129370000	166930000	0	0	97862000	61284000	9745200	14860000	18210000	106080000	22495000	55007000	21960000	72643000	44340000	32109000
Inosine-5-monophosphate dehydrogenase 2	IMPDH2	69076000	21718000	29938000	40928000	0	539360	19809000	24025000	20090000	26237000	0	0	31549000	19007000	0	0	79115000	30930000	19048000	2232100	50233000	76484000	36668000	34322000
Elongation factor Tu, mitochondrial	TUFM	58100000	50732000	51663000	58554000	56339000	0	33207000	45202000	43411000	52812000	0	6797600	18086000	22860000	2370500	0	43185000	39123000	53905000	41275000	40491000	80073000	79997000	75981000
T-complex protein 1 subunit theta	CCT8	0	0	0	0	0	2074100	70264000	63898000	25916000	52837000	54288000	23484000	135660000	87331000	10613000	43273000	1707500	43081000	74918000	83429000	0	83298000	15805000	70756000
Stress-70 protein, mitochondrial	HSPA9	174260000	115030000	147460000	168230000	52776000	4077100	103100000	72163000	177960000	157870000	43114000	15945000	196640000	115010000	86443000	51291000	85065000	19116000	34228000	10006000	18310000	85689000	87844000	69068000
Actin-related protein 2/3 complex subunit 4	ARPC4	55331000	58850000	24473000	20528000	116730000	8107900	35275000	30008000	0	0	0	0	0	0	0	0	17489000	102510000	48208000	101940000	354760000	89802000	71167000	82641000
Small nuclear ribonucleoprotein Sm D2	SNRPD2	82458000	84149000	109330000	243210000	6386500	26570000	33550000	33336000	8657400	10877000	26809000	48484000	136130000	27442000	41876000	27874000	23452000	87639000	78291000	105430000	55468000	92771000	44760000	115550000
26S proteasome non-ATPase regulatory subunit 2	PSMD2	35574000	16797000	27745000	39358000	18383000	2611200	62188000	25963000	41706000	100180000	21137000	9686600	77375000	24727000	13802000	16840000	110310000	74491000	70650000	65476000	65343000	101060000	117110000	126760000
Annexin A2;Putative annexin A2-like protein	ANXA2;ANXA2P2	826550000	877990000	585200000	577890000	495530000	104120000	214280000	227790000	2325600000	1901000000	56436000	61586000	1291300000	418150000	56752000	57957000	62147000	138950000	83841000	75646000	78779000	101130000	179600000	178340000
C-Myc-binding protein	MYCBP	308370000	265210000	164460000	236440000	44349000	15473000	97225000	91676000	30673000	75562000	13192000	22987000	52339000	38001000	22552000	27442000	76235000	68188000	60350000	81982000	122420000	102630000	76909000	66996000
Microtubule-associated protein 1B;MAP1B heavy chain;MAP1 light chain LC1	MAP1B	259160000	182860000	375540000	248250000	31739000	5306500	149540000	105180000	72922000	35351000	13856000	20678000	49317000	134040000	19861000	14871000	120230000	44029000	52742000	39205000	106020000	110320000	77456000	73017000
T-complex protein 1 subunit gamma	CCT3	0	0	0	5693700	45865000	6447000	206610000	110650000	167000000	110480000	64030000	21818000	114380000	46988000	83554000	75833000	3506500	71892000	123090000	120420000	6776500	112570000	133240000	146710000
Tyrosine-protein kinase JAK1	JAK1	61323000	22477000	64182000	18265000	25354000	0	48044000	41575000	34455000	20988000	0	5313900	43021000	11397000	5423000	0	263330000	160010000	129190000	141040000	120120000	139580000	238030000	207720000
Histone H2A type 2-C;Histone H2A type 2-A;Histone H2A type 1-A	HIST2H2AC;HIST2H2AA3;HIST1H2AA	33075000	46316000	62585000	53399000	79769000	6664600	15701000	23489000	87747000	52047000	0	6019200	78552000	50110000	26974000	0	25580000	329300000	21684000	110140000	60426000	142710000	69038000	49653000
Eukaryotic translation initiation factor 4B	EIF4B	297700000	147460000	202920000	94275000	119920000	13329000	122570000	102940000	23595000	51550000	100960000	100610000	161160000	43514000	83680000	125270000	148570000	103490000	74038000	99748000	103730000	144340000	85330000	154650000
Transitional endoplasmic reticulum ATPase	VCP	175800000	170670000	259340000	213060000	0	2938300	10570000	5167100	6094700	8401200	0	0	7476500	0	0	0	203410000	105220000	37952000	187410000	89620000	146060000	139530000	118730000
Tubulin beta chain;Tubulin beta-2B chain;Tubulin beta-2A chain	TUBB;TUBB2B;TUBB2A	523430000	343710000	263440000	363080000	198170000	13916000	182840000	129660000	366290000	259290000	33857000	37276000	309160000	135500000	46650000	19865000	313980000	138330000	258760000	219860000	221820000	203670000	250960000	332360000
Heat shock cognate 71 kDa protein	HSPA8	447220000	237060000	263910000	269540000	284930000	35027000	266800000	158100000	971810000	1023500000	110570000	67356000	1001000000	364190000	81723000	167970000	429890000	188640000	248930000	215740000	146560000	266750000	319090000	363740000
Small nuclear ribonucleoprotein-associated protein N;Small nuclear ribonucleoprotein-associated proteins B and B	SNRPN;SNRPB	135780000	122900000	204570000	252420000	32539000	6158000	64711000	101910000	334080000	233440000	52512000	13396000	165880000	86870000	58100000	51597000	40904000	352960000	147420000	161670000	129030000	281450000	254750000	188670000
14-3-3 protein zeta/delta	YWHAZ	60207000	11256000	67077000	47898000	6580200	2707100	16501000	18277000	62838000	70574000	11611000	14527000	101460000	10500000	15862000	12408000	383410000	282790000	205750000	278620000	160710000	282170000	295080000	571780000
Heterogeneous nuclear ribonucleoprotein H;Heterogeneous nuclear ribonucleoprotein H, N-terminally processed	HNRNPH1	426680000	371870000	316730000	314080000	88309000	25534000	145420000	152330000	176510000	98152000	121240000	65956000	99680000	41439000	0	18256000	607970000	245650000	216610000	215740000	324880000	286500000	284110000	320460000
OTU domain-containing protein 4	OTUD4	199840000	41216000	174980000	148890000	10499000	683090	55830000	22273000	28224000	14858000	12225000	8752800	131830000	0	3660300	19848000	602210000	196190000	176220000	274260000	400560000	292610000	359830000	291030000
Vimentin	VIM	36855000	54262000	38559000	26977000	56030000	19983000	0	12544000	324120000	253930000	0	3478700	188450000	63841000	79695000	30621000	163090000	329390000	40724000	94355000	88620000	306570000	177230000	75522000
6-phosphofructo-2-kinase/fructose-2,6-bisphosphatase 3;6-phosphofructo-2-kinase;Fructose-2,6-bisphosphatase	PFKFB3	501720000	377040000	424540000	487290000	90256000	30958000	214070000	154830000	94311000	145470000	71324000	93284000	260760000	93537000	86733000	71996000	436590000	221380000	194130000	191850000	196250000	319380000	256370000	235300000
Putative elongation factor 1-alpha-like 3;Elongation factor 1-alpha 1;Elongation factor 1-alpha 2	EEF1A1P5;EEF1A1;EEF1A2	670980000	207630000	373920000	780850000	170580000	38331000	230270000	212770000	783980000	622920000	101130000	111600000	766960000	373200000	225730000	240670000	460910000	182000000	222040000	234580000	304170000	369740000	313710000	286270000
Small nuclear ribonucleoprotein Sm D1	SNRPD1	764780000	534830000	662060000	813120000	316570000	28531000	327160000	327260000	279960000	137660000	4577800	86836000	232940000	127060000	35978000	0	172520000	377970000	289160000	314970000	517190000	407750000	236330000	211090000
Major vault protein	MVP	77452000	78527000	58389000	40079000	26314000	8413600	35440000	0	158420000	204920000	0	22168000	157310000	62201000	0	20496000	869530000	322830000	153390000	205290000	581930000	419050000	596090000	686660000
Tubulin beta-4B chain	TUBB4B	930160000	651730000	542210000	783970000	457490000	40053000	264600000	290600000	1275400000	988170000	142880000	93262000	1211400000	459290000	149760000	93714000	833160000	575450000	557480000	399210000	482120000	619110000	695320000	709330000
SUN domain-containing protein 2	SUN2	1932800000	1006100000	604950000	702640000	272590000	74803000	121690000	71937000	591310000	314260000	21868000	24449000	321090000	107710000	27776000	22553000	1200700000	791840000	503980000	545270000	889420000	713040000	719000000	686630000
Methylosome subunit pICln	CLNS1A	484250000	444740000	751400000	735910000	104140000	81094000	175670000	374100000	469960000	358660000	286090000	104300000	555460000	317380000	234560000	218650000	663070000	707520000	477370000	440110000	868550000	722010000	526300000	869180000
Aflatoxin B1 aldehyde reductase member 2	AKR7A2	322030000	196810000	194190000	295170000	87831000	22203000	90383000	183330000	162470000	137760000	17635000	36385000	333370000	112280000	82423000	52918000	541260000	597400000	423620000	449940000	404630000	796240000	708280000	604280000
Tubulin alpha-1B chain;Tubulin alpha-4A chain	TUBA1B;TUBA4A	2416200000	1624000000	1270200000	1648100000	817430000	135050000	617070000	530330000	2167300000	1713200000	261400000	135770000	1342800000	986180000	301420000	188320000	1610800000	698640000	863600000	635360000	1006400000	1068200000	1085500000	1032200000
Caveolin-1	CAV1	1295600000	1755100000	3519200000	2357600000	119340000	16507000	784730000	1057100000	163010000	137730000	126020000	91086000	182420000	148510000	74138000	123330000	343760000	2232200000	815770000	1849500000	1383800000	1352400000	2122700000	2165000000
Serine/threonine-protein kinase 38	STK38	2827300000	1971600000	2343200000	2633800000	1559600000	176500000	1347000000	1234400000	1620700000	1213200000	890560000	515220000	2035200000	1274100000	522480000	703650000	4697900000	3399200000	2650700000	2288600000	2757600000	3444700000	3018100000	2818800000
Methylosome protein 50	WDR77	6477400000	5033900000	4318000000	6255700000	3056500000	596990000	3009200000	2968800000	3928600000	2620900000	2025400000	1896200000	3065700000	2564000000	1312900000	1310400000	6604600000	4258800000	3150600000	2895400000	5303500000	5314200000	4057400000	4001200000
Protein arginine N-methyltransferase 5;Protein arginine N-methyltransferase 5, N-terminally processed	PRMT5	17365000000	12113000000	12602000000	16763000000	8104300000	1769600000	7943500000	7230800000	7685900000	4487200000	4469400000	2815300000	8149900000	4731000000	2913500000	2610700000	14857000000	10522000000	7824300000	8218000000	9620300000	11507000000	9230600000	8975200000

## Sheet: S3B. All Substrate Hits
Table S3B. 15 trapped substrate protein hits from MDA-MB-231 cells
Raw values from MaxQuant label-free quantitation used in this table were taken from Table S3A: Trial 2- columns D-G; Trial 3- columns Q-T; Trial 4- columns AD-AG; Trial 5- columns AQ-AT; Trial 6- columns BD-BG
Raw data were first normalized to the levels of HDAC1 in that trial (indicated by "WT norm", "MT norm", and MT+SA norm" for each trial)
Next, the normalized values were compared to yield fold enrichment ratios: No protein control divided by wild type; mutant divided by wild type; mutant divided by mutant+ SAHA
In a case where the wild type or mutant+SAHA sample contained no intensity signal, an infinity (∞) sign is shown.
The number of trials where each proteins shows at least 2-fold higher enrichment in mutant compared to wild type, with also higher intensity in wild type compared to the no protein control or mutant compared to mutant + SAHA, is shown in column BQ (blue highlight)
The 15 proteins hits are listed in order of number of trials showing the minimal enrichment described above.
The color coding of each protein name corresponds to the number of trials where that protein was enriched: 2 trials (grey highlight)
Finally, potential protein hits were analyzed for their cellular localization (column C: N- Nucleus, C- Cytoplasm, M- Mitochondria, Mem- Membrane, ER- Endoplasmic reticulum, N/A- not available)
Protein names	Gene names	Localization	Trial 2- No protein	Trial 2- WT	Trial 2- MUT	Trial 2- MUT+SAHA	HD1 WT	HD1 MUT	HD1 MUT+SAHA	WT norm	MT norm	MT + SA norm	Trial 2- IgG/WT	Trial 2- MT/WT	Trial 2- MT/SAHA	Trial 3- No protein	Trial 3- WT	Trial 3- MUT	Trial 3- MUT+SAHA	HD1 WT	HD1 Mutant	HD1 Mutant+SAHA	WT norm	MT norm	MT + SA norm	Trial 3- IgG/WT	Trial 3- MT/WT	Trial 3- MT/SAHA	Trial 4- No protein	Trial 4- WT	Trial 4- MUT	Trial 4- MUT+SAHA	HD1 WT	HD1 Mutant	HD1 Mutant+SAHA	WT norm	MT norm	MT +SA norm	Trial 4- IgG/WT	Trial 4- MT/WT	Trial 4- MT/SAHA	Trial 5- No protein	Trial 5- WT	Trial 5- MUT	Trial 5- MUT+SAHA	HD1 WT	HD1 Mutant	HD1 Mutant+SAHA	WT norm
Microfibrillar-associated protein 1	MFAP1	N	0	0	2427600	0	338360000	2492900000	2094200000	0	0.000973806	0	0	∞	∞	0	0	0	0	601680000	838260000	516410000	0	0	0	0	0	0	0	0	0	0	1131900000	729420000	840470000	0	0	0	0	0	0	0	942200	1468200	0	754030000	964080000	609030000	0.00124955
Thyroid hormone receptor-associated protein 3	THRAP3	N	0	470660	9905700	7452500	338360000	2492900000	2094200000	0.001391	0.00397356	0.00355864	0	1.1166	2.85662	10784000	0	0	0	601680000	838260000	516410000	0	0	0	∞	0	0	16385000	0	0	0	1131900000	729420000	840470000	0	0	0	∞	0	0	33367000	54980000	90385000	36443000	754030000	964080000	609030000	0.0729149
40S ribosomal protein S4, X isoform;40S ribosomal protein S4, Y isoform 1	RPS4X;RPS4Y1	N	0	0	9309400	4814600	338360000	2492900000	2094200000	0	0.00373437	0.00229902	0	1.62433	∞	8519600	22707000	0	5090400	601680000	838260000	516410000	0.0377393	0	0.00985728	0.375197	0	0	15952000	12535000	0	2573500	1131900000	729420000	840470000	0.0110743	0	0.00306198	1.2726	0	0	0	4852200	0	0	754030000	964080000	609030000	0.00643502
Protein Daple	CCDC88C	N	0	0	32263000	0	338360000	2492900000	2094200000	0	0.012942	0	0	∞	∞	0	0	0	0	601680000	838260000	516410000	0	0	0	0	0	0	0	0	0	0	1131900000	729420000	840470000	0	0	0	0	0	0	34019000	20467000	2454600	19258000	754030000	964080000	609030000	0.0271435
60S ribosomal protein L24	RPL24	N	0	0	5367400	0	338360000	2492900000	2094200000	0	0.00215307	0	0	∞	∞	57618000	116260000	0	0	601680000	838260000	516410000	0.193226	0	0	0.495596	0	0	63455000	33349000	6322500	5006700	1131900000	729420000	840470000	0.0294629	0.00866785	0.00595702	1.90276	1.45506	0.294196	0	0	0	0	754030000	964080000	609030000	0
Transgelin-2;Transgelin-3	TAGLN2;TAGLN3	N/C	0	0	5505300	0	338360000	2492900000	2094200000	0	0.00220839	0	0	∞	∞	0	0	0	0	601680000	838260000	516410000	0	0	0	0	0	0	9685600	0	0	0	1131900000	729420000	840470000	0	0	0	∞	0	0	0	0	2101100	0	754030000	964080000	609030000	0
Lysine-specific histone demethylase 1A	KDM1A	N/C	0	0	6300200	0	338360000	2492900000	2094200000	0	0.00252726	0	0	∞	∞	0	0	0	0	601680000	838260000	516410000	0	0	0	0	0	0	0	0	0	0	1131900000	729420000	840470000	0	0	0	0	0	0	0	0	38802000	10581000	754030000	964080000	609030000	0
Chloride intracellular channel protein 1	CLIC1	N/C	0	0	5967000	0	338360000	2492900000	2094200000	0	0.0023936	0	0	∞	∞	0	0	0	0	601680000	838260000	516410000	0	0	0	0	0	0	0	0	0	0	1131900000	729420000	840470000	0	0	0	0	0	0	0	0	4976300	0	754030000	964080000	609030000	0
Protein NDRG1	NDRG1	N/C	0	0	0	0	338360000	2492900000	2094200000	0	0	0	0	0	0	0	0	0	0	601680000	838260000	516410000	0	0	0	0	0	0	6386700	0	0	0	1131900000	729420000	840470000	0	0	0	∞	0	0	0	0	4861500	0	754030000	964080000	609030000	0
Tropomodulin-3	TMOD3	C	522510000	151400000	62465000	60875000	338360000	2492900000	2094200000	0.447452	0.0250572	0.0290684	3.45119	0.862008	0.0559996	2424400000	1831500000	0	0	601680000	838260000	516410000	3.04398	0	0	1.32372	0	0	1308400000	501670000	0	3139200	1131900000	729420000	840470000	0.443211	0	0.00373505	2.60809	0	0	26505000	84297000	225820000	37992000	754030000	964080000	609030000	0.111795
T-complex protein 1 subunit eta	CCT7	C	25625000	26829000	74839000	74070000	338360000	2492900000	2094200000	0.0792913	0.0300209	0.0353691	0.955123	0.848787	0.378615	92285000	68008000	62353000	61710000	601680000	838260000	516410000	0.11303	0.0743838	0.119498	1.35697	0.622469	0.658088	187180000	38989000	77205000	66710000	1131900000	729420000	840470000	0.0344456	0.105844	0.0793723	4.80084	1.33352	3.0728	15695000	23685000	210070000	79744000	754030000	964080000	609030000	0.0314112
T-complex protein 1 subunit beta	CCT2	C	1003600000	5142600	98078000	50255000	338360000	2492900000	2094200000	0.0151986	0.0393429	0.0239972	195.154	1.63948	2.58859	75088000	86651000	33537000	32656000	601680000	838260000	516410000	0.144015	0.0400079	0.0632366	0.866557	0.63267	0.277803	129500000	45133000	46429000	63890000	1131900000	729420000	840470000	0.0398737	0.0636519	0.076017	2.8693	0.837338	1.59634	0	73222000	686350000	259280000	754030000	964080000	609030000	0.0971075
T-complex protein 1 subunit zeta	CCT6A	C	37633000	10622000	46971000	124920000	338360000	2492900000	2094200000	0.0313926	0.0188419	0.0596505	3.54293	0.315872	0.600202	135830000	111670000	151530000	62348000	601680000	838260000	516410000	0.185597	0.180767	0.120734	1.21635	1.49724	0.973978	116480000	91589000	51985000	33074000	1131900000	729420000	840470000	0.0809162	0.071269	0.0393518	1.27177	1.81107	0.880775	20324000	86142000	658080000	277810000	754030000	964080000	609030000	0.114242
Actin, alpha cardiac muscle 1;Actin, gamma-enteric smooth muscle;Actin, aortic smooth muscle;Actin, alpha skeletal muscle	ACTC1;ACTG2;ACTA2;ACTA1	C	3324700000	396640000	814180000	952260000	338360000	2492900000	2094200000	1.17224	0.3266	0.454713	8.38216	0.718254	0.278611	13815000000	13687000000	81178000	0	601680000	838260000	516410000	22.748	0.0968411	0	1.00935	∞	0.00425713	7809600000	2901800000	47358000	73027000	1131900000	729420000	840470000	2.56365	0.0649256	0.0868883	2.6913	0.74723	0.0253254	0	22064000	239970000	13963000	754030000	964080000	609030000	0.0292614
T-complex protein 1 subunit alpha	TCP1	C	6303000	818220	84147000	143050000	338360000	2492900000	2094200000	0.00241819	0.0337547	0.0683077	7.70331	0.494156	13.9586	72857000	44540000	11040000	5388100	601680000	838260000	516410000	0.0740261	0.0131701	0.0104338	1.63577	1.26226	0.177912	130910000	48405000	27119000	83215000	1131900000	729420000	840470000	0.0427644	0.0371789	0.0990101	2.70447	0.375506	0.869388	9352500	57694000	806050000	233640000	754030000	964080000	609030000	0.0765142
BolA-like protein 2	BOLA2		0	1962400	23798000	15162000	338360000	2492900000	2094200000	0.00579974	0.00954631	0.00724	0	1.31855	1.64599	0	0	9565700	0	601680000	838260000	516410000	0	0.0114114	0	0	∞	∞	0	0	0	0	1131900000	729420000	840470000	0	0	0	0	0	0	0	0	0	0	754030000	964080000	609030000	0
26S proteasome non-ATPase regulatory subunit 8	PSMD8		0	0	0	0	338360000	2492900000	2094200000	0	0	0	0	0	0	16711000	0	0	0	601680000	838260000	516410000	0	0	0	∞	0	0	17168000	19667000	24823000	26508000	1131900000	729420000	840470000	0.0173752	0.0340311	0.0315395	0.872934	1.079	1.9586	0	3357600	0	0	754030000	964080000	609030000	0.00445287
DnaJ homolog subfamily C member 10	DNAJC10		0	0	6815300	0	338360000	2492900000	2094200000	0	0.00273388	0	0	∞	∞	0	0	0	0	601680000	838260000	516410000	0	0	0	0	0	0	0	0	0	0	1131900000	729420000	840470000	0	0	0	0	0	0	11446000	5613300	5869900	0	754030000	964080000	609030000	0.0074444
26S proteasome non-ATPase regulatory subunit 13	PSMD13		0	0	0	12046000	338360000	2492900000	2094200000	0	0	0.00575208	0	0	0	4329800	4523900	5486000	0	601680000	838260000	516410000	0.00751878	0.00654451	0	0.957095	∞	0.870422	0	13414000	13027000	0	1131900000	729420000	840470000	0.0118509	0.0178594	0	0	∞	1.50701	7011100	0	0	0	754030000	964080000	609030000	0
Nuclease-sensitive element-binding protein 1	YBX1		0	0	0	1735800	338360000	2492900000	2094200000	0	0	0.000828861	0	0	0	8109600	40866000	11598000	0	601680000	838260000	516410000	0.0679198	0.0138358	0	0.198444	∞	0.203708	65435000	13840000	0	0	1131900000	729420000	840470000	0.0122272	0	0	4.72796	0	0	0	3199200	5906900	978180	754030000	964080000	609030000	0.0042428
60S ribosomal protein L13	RPL13		0	0	9134700	0	338360000	2492900000	2094200000	0	0.00366429	0	0	∞	∞	282550000	307900000	15224000	11402000	601680000	838260000	516410000	0.511734	0.0181614	0.0220794	0.917668	0.822553	0.03549	135400000	25288000	9887800	0	1131900000	729420000	840470000	0.0223412	0.0135557	0	5.35432	∞	0.606758	0	10214000	16361000	8751600	754030000	964080000	609030000	0.0135459
Unconventional myosin-VI	MYO6		455220000	31978000	151780000	61643000	338360000	2492900000	2094200000	0.0945088	0.0608849	0.0294351	14.2354	2.06845	0.644225	5132300000	2171700000	23017000	39598000	601680000	838260000	516410000	3.60939	0.0274581	0.0766794	2.36326	0.358089	0.00760739	2078900000	142160000	18665000	18715000	1131900000	729420000	840470000	0.125594	0.0255888	0.0222673	14.6237	1.14917	0.203742	26153000	185350000	317170000	32708000	754030000	964080000	609030000	0.245813
Tropomyosin alpha-4 chain	TPM4		12492000	12679000	0	10696000	338360000	2492900000	2094200000	0.0374719	0	0.00510744	0.985251	0	0	1258000000	985890000	23208000	5134000	601680000	838260000	516410000	1.63856	0.0276859	0.00994171	1.276	2.78482	0.0168965	496500000	85916000	0	20117000	1131900000	729420000	840470000	0.0759042	0	0.0239354	5.7789	0	0	0	11551000	60996000	24094000	754030000	964080000	609030000	0.015319
Myosin-10	MYH10		445910000	569970000	1722400000	1146100000	338360000	2492900000	2094200000	1.68451	0.690922	0.547273	0.782339	1.26248	0.410163	2957400000	22268000000	480050000	283220000	601680000	838260000	516410000	37.0097	0.572674	0.54844	0.132809	1.04419	0.0154736	1658200000	408040000	197890000	33590000	1131900000	729420000	840470000	0.360491	0.271298	0.0399657	4.06382	6.78826	0.752578	16864000	1688900000	3342300000	473480000	754030000	964080000	609030000	2.23983
Myosin-9	MYH9		3555900000	4393700000	7597000000	5651200000	338360000	2492900000	2094200000	12.9853	3.04745	2.6985	0.809318	1.12931	0.234685	29462000000	153280000000	5489300000	3772300000	601680000	838260000	516410000	254.753	6.54845	7.30485	0.19221	0.896451	0.025705	12639000000	3499200000	5008600000	1097700000	1131900000	729420000	840470000	3.09144	6.86655	1.30605	3.61197	5.25748	2.22115	97609000	9360300000	15175000000	5059600000	754030000	964080000	609030000	12.4137
Eukaryotic translation initiation factor 5A-2;Eukaryotic translation initiation factor 5A-1-like;Eukaryotic translation initiation factor 5A-1	EIF5A2;EIF5AL1;EIF5A		0	0	0	0	338360000	2492900000	2094200000	0	0	0	0	0	0	0	0	5143800	0	601680000	838260000	516410000	0	0.00613628	0	0	∞	∞	10898000	0	0	0	1131900000	729420000	840470000	0	0	0	∞	0	0	0	0	0	0	754030000	964080000	609030000	0
Uncharacterized protein KIAA0226-like	KIAA0226L		0	0	0	0	338360000	2492900000	2094200000	0	0	0	0	0	0	0	0	9060500	0	601680000	838260000	516410000	0	0.0108087	0	0	∞	∞	0	0	0	0	1131900000	729420000	840470000	0	0	0	0	0	0	0	0	0	0	754030000	964080000	609030000	0
Spectrin alpha chain, non-erythrocytic 1	SPTAN1		0	0	0	0	338360000	2492900000	2094200000	0	0	0	0	0	0	23377000	240170000	0	0	601680000	838260000	516410000	0.399166	0	0	0.0973352	0	0	0	0	8852900	0	1131900000	729420000	840470000	0	0.0121369	0	0	∞	∞	0	0	0	0	754030000	964080000	609030000	0
Inactive tyrosine-protein kinase 7	PTK7		0	0	1384800	0	338360000	2492900000	2094200000	0	0.000555498	0	0	∞	∞	7724500	0	0	370750	601680000	838260000	516410000	0	0	0.000717937	∞	0	0	0	1961500	0	3410500	1131900000	729420000	840470000	0.00173293	0	0.00405785	0	0	0	0	0	0	0	754030000	964080000	609030000	0
Golgin subfamily A member 2	GOLGA2		0	0	21968000	11427000	338360000	2492900000	2094200000	0	0.00881223	0.0054565	0	1.615	∞	26284000	11312000	25034000	23260000	601680000	838260000	516410000	0.0188007	0.0298642	0.0450417	2.32355	0.663035	1.58847	22163000	8403900	28829000	13137000	1131900000	729420000	840470000	0.0074246	0.0395232	0.0156305	2.63723	2.52859	5.32328	0	0	0	0	754030000	964080000	609030000	0
Galectin-1	LGALS1		0	0	14450000	8263100	338360000	2492900000	2094200000	0	0.00579646	0.00394571	0	1.46906	∞	7870400	0	0	0	601680000	838260000	516410000	0	0	0	∞	0	0	0	11424000	0	0	1131900000	729420000	840470000	0.0100928	0	0	0	0	0	0	0	0	0	754030000	964080000	609030000	0
EF-hand calcium-binding domain-containing protein 5	EFCAB5		0	0	36639000	11461000	338360000	2492900000	2094200000	0	0.0146973	0.00547273	0	2.68556	∞	16289000	0	0	0	601680000	838260000	516410000	0	0	0	∞	0	0	0	16659000	0	0	1131900000	729420000	840470000	0.0147177	0	0	0	0	0	0	0	0	0	754030000	964080000	609030000	0
Protein S100-A6	S100A6		0	0	16978000	0	338360000	2492900000	2094200000	0	0.00681054	0	0	∞	∞	19801000	45427000	0	8297800	601680000	838260000	516410000	0.0755003	0	0.0160682	0.435886	0	0	20455000	19183000	3974600	4323600	1131900000	729420000	840470000	0.0169476	0.00544899	0.00514426	1.06631	1.05924	0.321519	0	0	0	0	754030000	964080000	609030000	0
Synaptotagmin-9	SYT9		0	0	0	0	338360000	2492900000	2094200000	0	0	0	0	0	0	37216000	37819000	0	0	601680000	838260000	516410000	0.0628557	0	0	0.984056	0	0	0	35075000	54875000	0	1131900000	729420000	840470000	0.0309877	0.075231	0	0	∞	2.42777	0	0	0	0	754030000	964080000	609030000	0
Pancreatic alpha-amylase	AMY2A		0	0	0	0	338360000	2492900000	2094200000	0	0	0	0	0	0	6240200	4917000	8186000	5845200	601680000	838260000	516410000	0.00817212	0.00976547	0.0113189	1.26911	0.862757	1.19497	0	5063100	7272500	0	1131900000	729420000	840470000	0.0044731	0.00997025	0	0	∞	2.22894	0	0	0	5827000	754030000	964080000	609030000	0
Protein slowmo homolog 1	SLMO1		0	124540000	73706000	0	338360000	2492900000	2094200000	0.36807	0.0295664	0	0	∞	0.0803282	22586000	24451000	0	109270000	601680000	838260000	516410000	0.0406379	0	0.211595	0.923725	0	0	116160000	150230000	238540000	90840000	1131900000	729420000	840470000	0.132724	0.327027	0.108082	0.773214	3.02572	2.46397	0	0	0	8441500	754030000	964080000	609030000	0
Golgin subfamily A member 3	GOLGA3		0	0	17238000	48256000	338360000	2492900000	2094200000	0	0.00691484	0.0230427	0	0.300088	∞	0	0	0	0	601680000	838260000	516410000	0	0	0	0	0	0	0	23912000	38825000	0	1131900000	729420000	840470000	0.0211255	0.0532272	0	0	∞	2.51957	3334800	3199600	0	0	754030000	964080000	609030000	0.00424333
26S proteasome non-ATPase regulatory subunit 1	PSMD1		0	0	9773400	0	338360000	2492900000	2094200000	0	0.00392049	0	0	∞	∞	0	0	0	0	601680000	838260000	516410000	0	0	0	0	0	0	12359000	0	0	0	1131900000	729420000	840470000	0	0	0	∞	0	0	13585000	11578000	1074600	23708000	754030000	964080000	609030000	0.0153548
Transketolase	TKT		0	0	5958100	0	338360000	2492900000	2094200000	0	0.00239003	0	0	∞	∞	0	0	0	0	601680000	838260000	516410000	0	0	0	0	0	0	0	0	0	0	1131900000	729420000	840470000	0	0	0	0	0	0	0	0	0	0	754030000	964080000	609030000	0
40S ribosomal protein S8	RPS8		0	0	0	0	338360000	2492900000	2094200000	0	0	0	0	0	0	99502000	135430000	5089700	0	601680000	838260000	516410000	0.225086	0.00607174	0	0.734712	∞	0.0269752	79260000	34123000	11962000	11927000	1131900000	729420000	840470000	0.0301467	0.0163993	0.0141909	2.32277	1.15563	0.543985	0	0	0	0	754030000	964080000	609030000	0
Activated RNA polymerase II transcriptional coactivator p15	SUB1		0	1932400	0	0	338360000	2492900000	2094200000	0.00571108	0	0	0	0	0	0	0	0	0	601680000	838260000	516410000	0	0	0	0	0	0	0	0	0	0	1131900000	729420000	840470000	0	0	0	0	0	0	0	0	0	0	754030000	964080000	609030000	0
40S ribosomal protein S3	RPS3		0	0	0	0	338360000	2492900000	2094200000	0	0	0	0	0	0	0	4533900	0	0	601680000	838260000	516410000	0.0075354	0	0	0	0	0	0	0	0	0	1131900000	729420000	840470000	0	0	0	0	0	0	0	0	0	0	754030000	964080000	609030000	0
40S ribosomal protein S9	RPS9		0	0	0	0	338360000	2492900000	2094200000	0	0	0	0	0	0	0	44046000	0	0	601680000	838260000	516410000	0.073205	0	0	0	0	0	57691000	20560000	0	0	1131900000	729420000	840470000	0.0181641	0	0	2.80598	0	0	0	0	0	0	754030000	964080000	609030000	0
Melanoma-associated antigen B1	MAGEB1		0	0	22840000	0	338360000	2492900000	2094200000	0	0.00916202	0	0	∞	∞	6193700	0	78059	0	601680000	838260000	516410000	0	9.31203e-05	0	∞	∞	∞	4486400	3084000	7307500	5551500	1131900000	729420000	840470000	0.00272462	0.0100182	0.00660523	1.45473	1.51671	3.67693	3766600	1336000	0	3204900	754030000	964080000	609030000	0.00177181
Heterogeneous nuclear ribonucleoprotein M	HNRNPM		0	0	0	0	338360000	2492900000	2094200000	0	0	0	0	0	0	12165000	15518000	0	0	601680000	838260000	516410000	0.0257911	0	0	0.783928	0	0	4167400	6407800	0	0	1131900000	729420000	840470000	0.0056611	0	0	0.650364	0	0	0	0	0	0	754030000	964080000	609030000	0
Cytoskeleton-associated protein 5	CKAP5		0	0	0	5303800	338360000	2492900000	2094200000	0	0	0.00253261	0	0	0	0	0	0	0	601680000	838260000	516410000	0	0	0	0	0	0	0	0	0	0	1131900000	729420000	840470000	0	0	0	0	0	0	0	0	0	0	754030000	964080000	609030000	0
Cyclin-dependent kinase 1;Cyclin-dependent-like kinase 5;Cyclin-dependent kinase 2;Cyclin-dependent kinase 4;Cyclin-dependent kinase 3;Cyclin-dependent kinase 6;Cyclin-dependent kinase 9;Cyclin-dependent kinase 15;Cyclin-dependent kinase 14;Cyclin-dependent kinase 18;Cyclin-dependent kinase 16;Cyclin-dependent kinase 17;Cyclin-dependent kinase 12;Cyclin-dependent kinase 13	CDK1;CDK5;CDK2;CDK4;CDK3;CDK6;CDK9;CDK15;CDK14;CDK18;CDK16;CDK17;CDK12;CDK13		0	0	0	5307700	338360000	2492900000	2094200000	0	0	0.00253448	0	0	0	37831000	20525000	0	0	601680000	838260000	516410000	0.0341128	0	0	1.84317	0	0	20897000	7236100	5738000	0	1131900000	729420000	840470000	0.00639288	0.00786652	0	2.88788	∞	1.23051	0	0	0	0	754030000	964080000	609030000	0
Triosephosphate isomerase	TPI1		0	0	8588400	0	338360000	2492900000	2094200000	0	0.00344514	0	0	∞	∞	0	0	0	0	601680000	838260000	516410000	0	0	0	0	0	0	11086000	0	1523600	1721800	1131900000	729420000	840470000	0	0.00208878	0.00204862	∞	1.01961	∞	0	0	0	0	754030000	964080000	609030000	0
Protein S100-A9	S100A9		0	0	0	34829000	338360000	2492900000	2094200000	0	0	0.0166312	0	0	0	0	0	23317000	0	601680000	838260000	516410000	0	0.027816	0	0	∞	∞	0	0	0	0	1131900000	729420000	840470000	0	0	0	0	0	0	2050600	14863000	4781800	22316000	754030000	964080000	609030000	0.0197114
Phosphoglycerate mutase 2;Phosphoglycerate mutase 1;Probable phosphoglycerate mutase 4	PGAM2;PGAM1;PGAM4		0	0	10117000	0	338360000	2492900000	2094200000	0	0.00405833	0	0	∞	∞	0	0	0	0	601680000	838260000	516410000	0	0	0	0	0	0	8357700	0	0	0	1131900000	729420000	840470000	0	0	0	∞	0	0	0	0	0	8973700	754030000	964080000	609030000	0
Tropomyosin alpha-1 chain	TPM1		4100400	0	0	0	338360000	2492900000	2094200000	0	0	0	∞	0	0	120490000	103560000	27115000	4925900	601680000	838260000	516410000	0.172118	0.0323468	0.00953874	1.16348	3.39109	0.187934	96451000	43134000	54170000	36361000	1131900000	729420000	840470000	0.0381076	0.0742645	0.0432627	2.23608	1.71659	1.94881	0	0	0	0	754030000	964080000	609030000	0
Peroxiredoxin-2	PRDX2		9848300	0	8556200	0	338360000	2492900000	2094200000	0	0.00343223	0	∞	∞	∞	13393000	0	0	0	601680000	838260000	516410000	0	0	0	∞	0	0	14321000	0	0	0	1131900000	729420000	840470000	0	0	0	∞	0	0	0	0	5728600	8461000	754030000	964080000	609030000	0
Mitogen-activated protein kinase kinase kinase 7	MAP3K7		0	363860	16807000	2146300	338360000	2492900000	2094200000	0.00107536	0.00674195	0.00102488	0	6.57829	6.26946	0	0	0	0	601680000	838260000	516410000	0	0	0	0	0	0	54274000	4779500	15488000	2127300	1131900000	729420000	840470000	0.00422255	0.0212333	0.00253108	11.3556	8.38902	5.02856	10428000	4576100	9518500	5562800	754030000	964080000	609030000	0.00606886
40S ribosomal protein S23	RPS23		20469000	0	0	11868000	338360000	2492900000	2094200000	0	0	0.00566708	∞	0	0	16254000	39753000	0	0	601680000	838260000	516410000	0.06607	0	0	0.408875	0	0	0	0	0	0	1131900000	729420000	840470000	0	0	0	0	0	0	0	10750000	6305300	6133800	754030000	964080000	609030000	0.0142567
Ras GTPase-activating protein-binding protein 2	G3BP2		1892000	0	0	0	338360000	2492900000	2094200000	0	0	0	∞	0	0	0	10322000	0	0	601680000	838260000	516410000	0.0171553	0	0	0	0	0	16372000	0	0	0	1131900000	729420000	840470000	0	0	0	∞	0	0	914400	1170200	1762800	0	754030000	964080000	609030000	0.00155193
Phosphatidylinositol-binding clathrin assembly protein	PICALM		0	0	7047200	2377900	338360000	2492900000	2094200000	0	0.00282691	0.00113547	0	2.48964	∞	189580000	190710000	4891700	9445000	601680000	838260000	516410000	0.316963	0.00583554	0.0182897	0.994075	0.319061	0.0184108	58668000	0	0	0	1131900000	729420000	840470000	0	0	0	∞	0	0	1244300	0	0	0	754030000	964080000	609030000	0
Ras GTPase-activating-like protein IQGAP1	IQGAP1		0	3833500	12092000	0	338360000	2492900000	2094200000	0.0113296	0.00485058	0	0	∞	0.428131	375400000	768350000	0	0	601680000	838260000	516410000	1.27701	0	0	0.488579	0	0	77424000	0	0	9326300	1131900000	729420000	840470000	0	0	0.0110965	∞	0	0	2854700	3005500	0	0	754030000	964080000	609030000	0.00398592
Polymerase I and transcript release factor	PTRF		0	0	13623000	0	338360000	2492900000	2094200000	0	0.00546472	0	0	∞	∞	0	9381100	0	0	601680000	838260000	516410000	0.0155915	0	0	0	0	0	0	0	0	0	1131900000	729420000	840470000	0	0	0	0	0	0	726030	526060	6478400	10197000	754030000	964080000	609030000	0.000697665
26S proteasome non-ATPase regulatory subunit 3	PSMD3		6357100	406740	0	5100700	338360000	2492900000	2094200000	0.00120209	0	0.00243563	15.6294	0	0	0	0	0	0	601680000	838260000	516410000	0	0	0	0	0	0	0	0	9322500	0	1131900000	729420000	840470000	0	0.0127807	0	0	∞	∞	14528000	0	14692000	11338000	754030000	964080000	609030000	0
HLA class I histocompatibility antigen, Cw-7 alpha chain;HLA class I histocompatibility antigen, B-73 alpha chain;HLA class I histocompatibility antigen, Cw-17 alpha chain	HLA-C;HLA-B		0	16852000	0	131560000	338360000	2492900000	2094200000	0.0498049	0	0.0628211	0	0	0	61154000	23883000	4060100	1104800	601680000	838260000	516410000	0.0396939	0.00484349	0.00213939	2.56057	2.26396	0.122021	22050000	10885000	355190000	268430000	1131900000	729420000	840470000	0.00961657	0.486949	0.319381	2.02572	1.52466	50.6364	0	0	0	0	754030000	964080000	609030000	0
Metastasis-associated protein MTA2;Metastasis-associated protein MTA3;Metastasis-associated protein MTA1	MTA2;MTA3;MTA1		21962000	0	43132000	25981000	338360000	2492900000	2094200000	0	0.0173019	0.0124062	∞	1.39462	∞	17496000	0	0	0	601680000	838260000	516410000	0	0	0	∞	0	0	19450000	0	0	0	1131900000	729420000	840470000	0	0	0	∞	0	0	0	5761300	8247000	0	754030000	964080000	609030000	0.00764068
Tropomyosin alpha-3 chain	TPM3		48286000	7490400	59902000	8152500	338360000	2492900000	2094200000	0.0221374	0.024029	0.00389289	6.44638	6.17254	1.08545	402750000	485620000	0	0	601680000	838260000	516410000	0.807107	0	0	0.829352	0	0	206030000	43089000	0	1567100	1131900000	729420000	840470000	0.0380679	0	0.00186455	4.7815	0	0	0	3827600	1512100	1740900	754030000	964080000	609030000	0.00507619
60S ribosomal protein L7	RPL7		51434000	353920	29887000	47362000	338360000	2492900000	2094200000	0.00104599	0.0119888	0.0226158	145.327	0.53011	11.4618	333060000	495430000	12277000	24039000	601680000	838260000	516410000	0.823411	0.0146458	0.0465502	0.672264	0.314624	0.0177868	190820000	97247000	11363000	1824200	1131900000	729420000	840470000	0.0859148	0.0155781	0.00217045	1.96222	7.17737	0.181321	3425200	9219100	11685000	0	754030000	964080000	609030000	0.0122264
Glutathione S-transferase omega-1	GSTO1		0	0	11967000	0	338360000	2492900000	2094200000	0	0.00480043	0	0	∞	∞	0	0	0	0	601680000	838260000	516410000	0	0	0	0	0	0	34248000	15339000	72193000	128240000	1131900000	729420000	840470000	0.0135516	0.0989732	0.152581	2.23274	0.648659	7.30346	0	3718900	0	44427000	754030000	964080000	609030000	0.00493203
Glutaminyl-peptide cyclotransferase-like protein	QPCTL		3031300	949210	9974200	6260100	338360000	2492900000	2094200000	0.00280533	0.00400104	0.00298926	3.1935	1.33847	1.42623	0	17030000	0	0	601680000	838260000	516410000	0.0283041	0	0	0	0	0	0	9774400	0	0	1131900000	729420000	840470000	0.00863539	0	0	0	0	0	0	11817000	10271000	0	754030000	964080000	609030000	0.0156718
Retinoic acid-induced protein 3	GPRC5A		0	0	0	0	338360000	2492900000	2094200000	0	0	0	0	0	0	49995000	122510000	0	0	601680000	838260000	516410000	0.203613	0	0	0.408089	0	0	0	0	0	0	1131900000	729420000	840470000	0	0	0	0	0	0	0	12845000	12189000	0	754030000	964080000	609030000	0.0170351
Ig kappa chain V-III region NG9			0	0	0	0	338360000	2492900000	2094200000	0	0	0	0	0	0	0	0	24775000	11326000	601680000	838260000	516410000	0	0.0295553	0.0219322	0	1.34758	∞	0	0	0	0	1131900000	729420000	840470000	0	0	0	0	0	0	8281100	6001300	0	13984000	754030000	964080000	609030000	0.00795897
TGF-beta-activated kinase 1 and MAP3K7-binding protein 1	TAB1		0	786670	14597000	0	338360000	2492900000	2094200000	0.00232495	0.00585543	0	0	∞	2.51852	18827000	0	25176000	0	601680000	838260000	516410000	0	0.0300336	0	∞	∞	∞	60131000	11420000	0	8414100	1131900000	729420000	840470000	0.0100892	0	0.0100112	5.26541	0	0	18110000	12456000	17985000	11755000	754030000	964080000	609030000	0.0165192
26S protease regulatory subunit 7	PSMC2		0	0	9298400	13053000	338360000	2492900000	2094200000	0	0.00372995	0.00623293	0	0.598427	∞	0	0	10916000	0	601680000	838260000	516410000	0	0.0130222	0	0	∞	∞	0	0	0	0	1131900000	729420000	840470000	0	0	0	0	0	0	31130000	10216000	0	0	754030000	964080000	609030000	0.0135485
Calmodulin	CALM1		85422000	20252000	0	29634000	338360000	2492900000	2094200000	0.0598534	0	0.0141505	4.21795	0	0	725190000	714600000	31649000	0	601680000	838260000	516410000	1.18767	0.0377556	0	1.01482	∞	0.0317895	510060000	256650000	7403600	11548000	1131900000	729420000	840470000	0.226743	0.01015	0.0137399	1.98738	0.738721	0.0447643	0	60056000	57037000	20183000	754030000	964080000	609030000	0.0796467
Nucleosome assembly protein 1-like 1	NAP1L1		9784600	0	49781000	11092000	338360000	2492900000	2094200000	0	0.0199691	0.00529653	∞	3.77022	∞	42874000	70818000	0	0	601680000	838260000	516410000	0.1177	0	0	0.605411	0	0	40517000	32127000	18310000	3252400	1131900000	729420000	840470000	0.0283832	0.0251021	0.00386974	1.26115	6.48678	0.8844	45118000	11959000	34781000	0	754030000	964080000	609030000	0.0158601
Monocarboxylate transporter 4	SLC16A3		0	0	5652600	3381900	338360000	2492900000	2094200000	0	0.00226748	0.00161489	0	1.40411	∞	0	0	0	0	601680000	838260000	516410000	0	0	0	0	0	0	0	2594200	0	0	1131900000	729420000	840470000	0.0022919	0	0	0	0	0	961180	0	3881300	7533000	754030000	964080000	609030000	0
Ig kappa chain V-I region Lay;Ig kappa chain V-III region POM;Ig kappa chain V-III region VH;Ig kappa chain V-III region CLL			18855000	3010100	12309000	48657000	338360000	2492900000	2094200000	0.00889615	0.00493762	0.0232342	6.26391	0.212516	0.555029	43341000	12487000	0	0	601680000	838260000	516410000	0.0207536	0	0	3.47089	0	0	32073000	16428000	50312000	53866000	1131900000	729420000	840470000	0.0145136	0.0689754	0.0640903	1.95234	1.07622	4.75245	0	0	0	0	754030000	964080000	609030000	0
Unconventional myosin-Ib	MYO1B		769570000	92149000	87400000	136900000	338360000	2492900000	2094200000	0.27234	0.0350596	0.065371	8.35137	0.536317	0.128735	3010800000	3168900000	0	8120000	601680000	838260000	516410000	5.26675	0	0.0157239	0.950109	0	0	1080100000	489930000	7171100	7349400	1131900000	729420000	840470000	0.432839	0.00983124	0.00874439	2.2046	1.12429	0.0227134	88950000	68402000	416070000	15059000	754030000	964080000	609030000	0.0907152
Ig gamma-2 chain C region	IGHG2		1510300000	131630000	1165900000	81723000	338360000	2492900000	2094200000	0.389024	0.467688	0.0390235	11.4738	11.9848	1.20221	78610000	74928000	1677100	48423000	601680000	838260000	516410000	0.124531	0.00200069	0.0937685	1.04914	0.0213365	0.0160658	0	100490000	275810000	575910000	1131900000	729420000	840470000	0.0887799	0.378122	0.685224	0	0.551823	4.2591	216150000	103890000	103200000	2498500	754030000	964080000	609030000	0.13778
T-complex protein 1 subunit delta	CCT4		0	1307000	59776000	68073000	338360000	2492900000	2094200000	0.00386275	0.0239785	0.0325055	0	0.737675	6.20762	82935000	27664000	6619500	0	601680000	838260000	516410000	0.0459779	0.00789671	0	2.99794	∞	0.17175	47618000	41963000	17150000	11842000	1131900000	729420000	840470000	0.0370731	0.0235118	0.0140897	1.13476	1.66872	0.634203	0	11161000	57070000	38120000	754030000	964080000	609030000	0.0148018
Ig kappa chain V-IV region Len;Ig kappa chain V-IV region;Ig kappa chain V-IV region JI;Ig kappa chain V-IV region B17;Ig kappa chain V-IV region STH	IGKV4-1		59026000	11198000	118250000	165760000	338360000	2492900000	2094200000	0.0330949	0.0474347	0.0791519	5.27112	0.599287	1.43329	137280000	77791000	128550000	124910000	601680000	838260000	516410000	0.12929	0.153353	0.241881	1.76473	0.634002	1.18612	118340000	135340000	178400000	157160000	1131900000	729420000	840470000	0.119569	0.244578	0.186991	0.87439	1.30797	2.0455	38278000	109580000	81774000	41655000	754030000	964080000	609030000	0.145326
Myosin regulatory light chain 12B	MYL12B		2139100000	452640000	820820000	773490000	338360000	2492900000	2094200000	1.33775	0.329263	0.369349	4.72583	0.89147	0.246133	14824000000	13259000000	679720000	319800000	601680000	838260000	516410000	22.0366	0.81087	0.619275	1.11803	1.30939	0.0367965	7280400000	2606500000	283840000	202090000	1131900000	729420000	840470000	2.30277	0.389131	0.240449	2.79317	1.61835	0.168984	9681200	1109900000	1472400000	503650000	754030000	964080000	609030000	1.47196
Proteasomal ubiquitin receptor ADRM1	ADRM1		0	0	0	0	338360000	2492900000	2094200000	0	0	0	0	0	0	0	0	0	0	601680000	838260000	516410000	0	0	0	0	0	0	3969700	0	0	0	1131900000	729420000	840470000	0	0	0	∞	0	0	0	0	1137600	0	754030000	964080000	609030000	0
Apolipoprotein A-I;Proapolipoprotein A-I;Truncated apolipoprotein A-I	APOA1		0	0	0	0	338360000	2492900000	2094200000	0	0	0	0	0	0	0	0	0	0	601680000	838260000	516410000	0	0	0	0	0	0	0	0	0	0	1131900000	729420000	840470000	0	0	0	0	0	0	0	0	1387300	0	754030000	964080000	609030000	0
60S ribosomal protein L17	RPL17		0	0	0	0	338360000	2492900000	2094200000	0	0	0	0	0	0	29076000	46898000	2933700	0	601680000	838260000	516410000	0.0779451	0.00349975	0	0.619984	∞	0.0449002	14404000	7802200	0	0	1131900000	729420000	840470000	0.00689301	0	0	1.84615	0	0	0	0	5013600	0	754030000	964080000	609030000	0
Nucleophosmin	NPM1		0	1302600	0	0	338360000	2492900000	2094200000	0.00384975	0	0	0	0	0	0	0	0	0	601680000	838260000	516410000	0	0	0	0	0	0	0	0	0	0	1131900000	729420000	840470000	0	0	0	0	0	0	0	0	7879500	0	754030000	964080000	609030000	0
Target of Myb protein 1	TOM1		5364000	0	0	0	338360000	2492900000	2094200000	0	0	0	∞	0	0	154010000	143390000	0	0	601680000	838260000	516410000	0.238316	0	0	1.07406	0	0	78499000	23674000	0	0	1131900000	729420000	840470000	0.0209153	0	0	3.31583	0	0	0	0	7935800	0	754030000	964080000	609030000	0
LIM domain and actin-binding protein 1	LIMA1		86758000	4249000	11793000	16845000	338360000	2492900000	2094200000	0.0125576	0.00473064	0.00804364	20.4185	0.588121	0.376714	1255400000	780630000	0	0	601680000	838260000	516410000	1.29742	0	0	1.60819	0	0	490500000	55347000	0	4854800	1131900000	729420000	840470000	0.0488974	0	0.00577629	8.86227	0	0	0	0	13043000	0	754030000	964080000	609030000	0
60S ribosomal protein L23	RPL23		72240000	0	27756000	22186000	338360000	2492900000	2094200000	0	0.011134	0.010594	∞	1.05097	∞	36821000	79007000	1540000	729620	601680000	838260000	516410000	0.131311	0.00183714	0.00141287	0.466047	1.30029	0.0139908	39854000	25312000	0	0	1131900000	729420000	840470000	0.0223624	0	0	1.57451	0	0	0	0	2214500	0	754030000	964080000	609030000	0
Toll-interacting protein	TOLLIP		21461000	0	0	0	338360000	2492900000	2094200000	0	0	0	∞	0	0	111380000	94733000	0	0	601680000	838260000	516410000	0.157447	0	0	1.17573	0	0	42056000	0	0	0	1131900000	729420000	840470000	0	0	0	∞	0	0	0	0	6708500	0	754030000	964080000	609030000	0
L-lactate dehydrogenase B chain	LDHB		0	0	0	0	338360000	2492900000	2094200000	0	0	0	0	0	0	0	0	0	0	601680000	838260000	516410000	0	0	0	0	0	0	6499600	0	0	0	1131900000	729420000	840470000	0	0	0	∞	0	0	282720	749200	4400600	949510	754030000	964080000	609030000	0.000993594
Neurabin-2;Neurabin-1	PPP1R9B;PPP1R9A		0	0	0	0	338360000	2492900000	2094200000	0	0	0	0	0	0	33480000	8623600	0	0	601680000	838260000	516410000	0.0143325	0	0	3.88237	0	0	0	0	0	0	1131900000	729420000	840470000	0	0	0	0	0	0	0	0	1924900	0	754030000	964080000	609030000	0
Phosphoglycerate kinase 1	PGK1		0	0	0	0	338360000	2492900000	2094200000	0	0	0	0	0	0	0	11058000	0	0	601680000	838260000	516410000	0.0183785	0	0	#NAME?	0	#NAME?	17218000	0	0	0	1131900000	729420000	840470000	0	0	0	∞	0	0	0	0	11712000	0	754030000	964080000	609030000	0
Protein unc-45 homolog A	UNC45A		71394000	12931000	20081000	16878000	338360000	2492900000	2094200000	0.0382167	0.00805528	0.0080594	5.52115	0.999488	0.210779	905930000	817830000	5939600	4707200	601680000	838260000	516410000	1.35924	0.00708563	0.00911524	1.10772	0.777339	0.00521292	276210000	58426000	4489300	5819800	1131900000	729420000	840470000	0.0516176	0.00615462	0.00692446	4.72752	0.888823	0.119235	7702800	11645000	47961000	5776800	754030000	964080000	609030000	0.0154437
Heat shock protein HSP 90-beta	HSP90AB1		8097500	2246200	6061500	0	338360000	2492900000	2094200000	0.00663849	0.00243151	0	3.60498	∞	0.366274	63518000	53262000	0	4733100	601680000	838260000	516410000	0.0885221	0	0.00916539	1.19256	0	0	99194000	21266000	7393900	0	1131900000	729420000	840470000	0.0187879	0.0101367	0	4.66444	∞	0.539533	0	0	22019000	2407200	754030000	964080000	609030000	0
Myosin phosphatase Rho-interacting protein	MPRIP		142130000	11281000	34671000	60295000	338360000	2492900000	2094200000	0.0333402	0.0139079	0.0287914	12.5991	0.483057	0.417151	2851500000	1310600000	47042000	59087000	601680000	838260000	516410000	2.17823	0.0561186	0.114419	2.17572	0.490467	0.0257634	938790000	113720000	6736600	0	1131900000	729420000	840470000	0.100468	0.00923556	0	8.25528	∞	0.0919251	0	387310	6518400	664030	754030000	964080000	609030000	0.000513653
60 kDa heat shock protein, mitochondrial	HSPD1		12942000	437310	10647000	0	338360000	2492900000	2094200000	0.00129244	0.00427093	0	29.5946	∞	3.30455	6600200	12082000	0	0	601680000	838260000	516410000	0.0200804	0	0	0.546284	0	0	41489000	7803700	1598700	2411300	1131900000	729420000	840470000	0.00689434	0.00219174	0.00286899	5.31658	0.763942	0.317905	0	6486000	25790000	13598000	754030000	964080000	609030000	0.00860178
40S ribosomal protein S20	RPS20		0	0	0	0	338360000	2492900000	2094200000	0	0	0	0	0	0	0	0	0	5548700	601680000	838260000	516410000	0	0	0.0107448	0	0	0	0	0	0	0	1131900000	729420000	840470000	0	0	0	0	0	0	0	0	7830900	0	754030000	964080000	609030000	0
T-complex protein 1 subunit epsilon	CCT5		56831000	1216600	92937000	89310000	338360000	2492900000	2094200000	0.00359558	0.0372807	0.0426464	46.713	0.874182	10.3685	127890000	87015000	67980000	35409000	601680000	838260000	516410000	0.14462	0.0810966	0.0685676	1.46975	1.18272	0.560756	54637000	5341600	26412000	22003000	1131900000	729420000	840470000	0.00471914	0.0362096	0.0261794	10.2286	1.38313	7.67291	0	80336000	324210000	173220000	754030000	964080000	609030000	0.106542
Enhancer of rudimentary homolog	ERH		51715000	11495000	88117000	113360000	338360000	2492900000	2094200000	0.0339727	0.0353472	0.0541305	4.49891	0.653	1.04046	94852000	64155000	59054000	79159000	601680000	838260000	516410000	0.106626	0.0704483	0.153287	1.47848	0.459584	0.660702	67567000	37102000	66334000	44728000	1131900000	729420000	840470000	0.0327785	0.0909407	0.0532178	1.82111	1.70884	2.7744	16387000	53589000	133530000	50698000	754030000	964080000	609030000	0.0710701
Tripartite motif-containing protein 38	TRIM38		0	4049200	43393000	0	338360000	2492900000	2094200000	0.0119671	0.0174066	0	0	∞	1.45454	0	0	25655000	16727000	601680000	838260000	516410000	0	0.0306051	0.0323909	0	0.944865	∞	33263000	0	0	0	1131900000	729420000	840470000	0	0	0	∞	0	0	0	0	0	0	754030000	964080000	609030000	0
Isocitrate dehydrogenase [NADP] cytoplasmic	IDH1		0	0	0	0	338360000	2492900000	2094200000	0	0	0	0	0	0	0	0	0	5722500	601680000	838260000	516410000	0	0	0.0110813	0	0	0	5006700	8914900	9524200	0	1131900000	729420000	840470000	0.00787605	0.0130572	0	0.56161	∞	1.65784	0	0	0	0	754030000	964080000	609030000	0
Dihydrolipoyllysine-residue succinyltransferase component of 2-oxoglutarate dehydrogenase complex, mitochondrial	DLST		33321000	9090800	93041000	99842000	338360000	2492900000	2094200000	0.0268672	0.0373224	0.0476755	3.66535	0.782842	1.38914	108670000	109600000	79546000	78538000	601680000	838260000	516410000	0.182157	0.0948942	0.152085	0.991515	0.623957	0.520948	46913000	62211000	59737000	7099100	1131900000	729420000	840470000	0.0549616	0.0818966	0.00844658	0.754095	9.69582	1.49007	6853000	0	0	0	754030000	964080000	609030000	0
14-3-3 protein beta/alpha;14-3-3 protein beta/alpha, N-terminally processed	YWHAB		0	303560	3918700	0	338360000	2492900000	2094200000	0.000897151	0.00157194	0	0	∞	1.75215	0	0	0	0	601680000	838260000	516410000	0	0	0	0	0	0	0	0	0	0	1131900000	729420000	840470000	0	0	0	0	0	0	191540	0	7447500	1189300	754030000	964080000	609030000	0
L-lactate dehydrogenase A chain	LDHA		0	1635900	15996000	0	338360000	2492900000	2094200000	0.00483479	0.00641662	0	0	∞	1.32718	13762000	14637000	0	0	601680000	838260000	516410000	0.0243269	0	0	0.94022	0	0	126330000	35529000	0	0	1131900000	729420000	840470000	0.0313888	0	0	3.55569	0	0	6048700	5955300	12778000	19353000	754030000	964080000	609030000	0.00789796
GRIP1-associated protein 1	GRIPAP1		0	0	0	0	338360000	2492900000	2094200000	0	0	0	0	0	0	0	0	0	0	601680000	838260000	516410000	0	0	0	0	0	0	0	0	0	0	1131900000	729420000	840470000	0	0	0	0	0	0	0	0	0	0	754030000	964080000	609030000	0
60S ribosomal protein L27	RPL27		0	1373500	13021000	11096000	338360000	2492900000	2094200000	0.00405929	0.00522323	0.00529844	0	0.985805	1.28674	39154000	74660000	0	0	601680000	838260000	516410000	0.124086	0	0	0.524431	0	0	33069000	24685000	0	0	1131900000	729420000	840470000	0.0218085	0	0	1.33964	0	0	0	0	0	0	754030000	964080000	609030000	0
Putative pre-mRNA-splicing factor ATP-dependent RNA helicase DHX15	DHX15		0	0	0	0	338360000	2492900000	2094200000	0	0	0	0	0	0	0	0	0	0	601680000	838260000	516410000	0	0	0	0	0	0	0	5552100	4760300	0	1131900000	729420000	840470000	0.00490512	0.00652614	0	0	∞	1.33048	9443800	5915500	0	6952800	754030000	964080000	609030000	0.00784518
Poly(rC)-binding protein 1	PCBP1		0	1643900	18042000	0	338360000	2492900000	2094200000	0.00485843	0.00723735	0	0	∞	1.48965	37352000	25693000	8978500	4890100	601680000	838260000	516410000	0.0427021	0.0107109	0.00946941	1.45378	1.1311	0.250828	15208000	14763000	0	0	1131900000	729420000	840470000	0.0130427	0	0	1.03014	0	0	16849000	0	10732000	8615000	754030000	964080000	609030000	0
Proteasome subunit alpha type-4	PSMA4		0	1104100	16192000	0	338360000	2492900000	2094200000	0.00326309	0.00649525	0	0	∞	1.99052	0	0	0	0	601680000	838260000	516410000	0	0	0	0	0	0	55738000	0	0	26444000	1131900000	729420000	840470000	0	0	0.0314633	∞	0	0	0	10978000	10371000	0	754030000	964080000	609030000	0.0145591
26S protease regulatory subunit 4	PSMC1		0	0	0	14355000	338360000	2492900000	2094200000	0	0	0.00685465	0	0	0	0	0	0	0	601680000	838260000	516410000	0	0	0	0	0	0	0	0	0	0	1131900000	729420000	840470000	0	0	0	0	0	0	12920000	0	12469000	0	754030000	964080000	609030000	0
Voltage-dependent anion-selective channel protein 1	VDAC1		0	0	0	0	338360000	2492900000	2094200000	0	0	0	0	0	0	0	0	0	0	601680000	838260000	516410000	0	0	0	0	0	0	0	0	0	0	1131900000	729420000	840470000	0	0	0	0	0	0	0	1307400	0	1347400	754030000	964080000	609030000	0.00173388
Guanine nucleotide-binding protein G(I)/G(S)/G(T) subunit beta-2;Guanine nucleotide-binding protein subunit beta-4	GNB2;GNB4		44149000	22114000	14509000	0	338360000	2492900000	2094200000	0.0653564	0.00582013	0	1.99643	∞	0.0890521	217510000	221360000	0	0	601680000	838260000	516410000	0.367903	0	0	0.982608	0	0	75772000	21105000	11425000	0	1131900000	729420000	840470000	0.0186456	0.0156631	0	3.59024	∞	0.840042	0	0	7207500	10248000	754030000	964080000	609030000	0
Endonuclease domain-containing 1 protein	ENDOD1		0	0	0	5231300	338360000	2492900000	2094200000	0	0	0.00249799	0	0	0	0	0	0	0	601680000	838260000	516410000	0	0	0	0	0	0	0	0	0	0	1131900000	729420000	840470000	0	0	0	0	0	0	0	7854500	8596100	0	754030000	964080000	609030000	0.0104167
Histone H4	HIST1H4A		110410000	36581000	70666000	61121000	338360000	2492900000	2094200000	0.108113	0.0283469	0.0291858	3.01823	0.971255	0.262198	352080000	323110000	59744000	25573000	601680000	838260000	516410000	0.537013	0.0712714	0.0495207	1.08966	1.43922	0.132718	284430000	123400000	53060000	68235000	1131900000	729420000	840470000	0.10902	0.0727427	0.0811867	2.30494	0.895993	0.667241	7469400	135860000	18351000	57631000	754030000	964080000	609030000	0.180179
MOB kinase activator 2	MOB2		30650000	11441000	60904000	132160000	338360000	2492900000	2094200000	0.0338131	0.024431	0.0631076	2.67896	0.387132	0.72253	128980000	70383000	0	10152000	601680000	838260000	516410000	0.116977	0	0.0196588	1.83254	0	0	91210000	45076000	34061000	10325000	1131900000	729420000	840470000	0.0398233	0.046696	0.0122848	2.02347	3.80112	1.17258	11831000	57534000	78196000	17880000	754030000	964080000	609030000	0.076302
Serine/threonine-protein kinase 38-like	STK38L		21917000	6547100	66154000	100640000	338360000	2492900000	2094200000	0.0193495	0.026537	0.0480565	3.34759	0.552203	1.37145	121850000	77627000	55270000	0	601680000	838260000	516410000	0.129017	0.0659342	0	1.56969	∞	0.51105	101120000	121370000	71570000	39613000	1131900000	729420000	840470000	0.107227	0.0981191	0.047132	0.833155	2.08179	0.915061	109620000	118240000	117780000	77974000	754030000	964080000	609030000	0.156811
Peroxiredoxin-1	PRDX1		0	16588000	90022000	220900000	338360000	2492900000	2094200000	0.0490247	0.0361114	0.105482	0	0.342347	0.736595	365020000	164780000	31636000	1320000	601680000	838260000	516410000	0.273867	0.0377401	0.00255611	2.2152	14.7647	0.137805	203100000	182720000	19330000	27944000	1131900000	729420000	840470000	0.161428	0.0265005	0.0332481	1.11154	0.797054	0.164163	15398000	42151000	3139200	4033800	754030000	964080000	609030000	0.055901
78 kDa glucose-regulated protein	HSPA5		99205000	36297000	262020000	351100000	338360000	2492900000	2094200000	0.107273	0.105107	0.167654	2.73315	0.626927	0.979801	759940000	751390000	110380000	72684000	601680000	838260000	516410000	1.24882	0.131678	0.140749	1.01138	0.935551	0.105442	854140000	383880000	158580000	174090000	1131900000	729420000	840470000	0.339147	0.217406	0.207134	2.22502	1.04959	0.641037	141710000	74982000	73345000	78069000	754030000	964080000	609030000	0.0994417
Protein phosphatase 1B	PPM1B		48477000	4395900	77457000	82821000	338360000	2492900000	2094200000	0.0129918	0.031071	0.0395478	11.0278	0.785658	2.39159	96728000	11389000	110400000	62628000	601680000	838260000	516410000	0.0189287	0.131701	0.121276	8.49311	1.08597	6.95777	158530000	26366000	197530000	99506000	1131900000	729420000	840470000	0.0232936	0.270804	0.118393	6.01267	2.28733	11.6257	161220000	352060000	322480000	193370000	754030000	964080000	609030000	0.466904
Small nuclear ribonucleoprotein Sm D3	SNRPD3		25919000	16458000	194550000	228950000	338360000	2492900000	2094200000	0.0486405	0.0780416	0.109326	1.57486	0.713845	1.60446	121550000	61468000	13411000	14747000	601680000	838260000	516410000	0.102161	0.0159986	0.0285568	1.97745	0.560239	0.156603	126220000	72959000	67641000	55414000	1131900000	729420000	840470000	0.0644571	0.0927326	0.0659322	1.73001	1.40648	1.43867	47670000	195770000	122490000	91456000	754030000	964080000	609030000	0.259632
Acetyl-coenzyme A synthetase, cytoplasmic	ACSS2		406530000	76673000	1314700000	1180700000	338360000	2492900000	2094200000	0.226602	0.527378	0.563795	5.30213	0.935407	2.32733	278830000	534000000	100070000	104840000	601680000	838260000	516410000	0.887515	0.119378	0.203017	0.522154	0.588021	0.134508	209820000	207690000	0	180920000	1131900000	729420000	840470000	0.183488	0	0.215261	1.01026	0	0	456580000	421400000	265820000	9882400	754030000	964080000	609030000	0.558864
Ig kappa chain V-II region TEW;Ig kappa chain V-II region Cum;Ig kappa chain V-II region GM607;Ig kappa chain V-II region RPMI 6410			23084000000	25788000000	45970000000	40661000000	338360000	2492900000	2094200000	76.2147	18.4404	19.416	0.895145	0.949751	0.241953	41478000000	46138000000	28592000000	13608000000	601680000	838260000	516410000	76.682	34.1087	26.3512	0.898999	1.29439	0.444808	86418000000	47624000000	44095000000	41202000000	1131900000	729420000	840470000	42.0744	60.4521	49.0226	1.81459	1.23315	1.43679	11825000000	21430000000	21884000000	15489000000	754030000	964080000	609030000	28.4206
Dedicator of cytokinesis protein 7	DOCK7		0	0	0	0	338360000	2492900000	2094200000	0	0	0	0	0	0	22718000	64970000	0	0	601680000	838260000	516410000	0.107981	0	0	0.349669	0	0	6804600	0	0	0	1131900000	729420000	840470000	0	0	0	∞	0	0	0	5809500	9221900	0	754030000	964080000	609030000	0.0077046
60S ribosomal protein L4	RPL4		3892600	0	0	3295000	338360000	2492900000	2094200000	0	0	0.00157339	∞	0	0	276500000	287490000	0	5374700	601680000	838260000	516410000	0.477812	0	0.0104078	0.961773	0	0	59222000	58890000	2075500	0	1131900000	729420000	840470000	0.0520276	0.00284541	0	1.00564	∞	0.0546905	0	6184000	9687500	0	754030000	964080000	609030000	0.00820127
Acyl-coenzyme A thioesterase 9, mitochondrial	ACOT9		0	0	0	0	338360000	2492900000	2094200000	0	0	0	0	0	0	0	0	0	0	601680000	838260000	516410000	0	0	0	0	0	0	0	0	0	0	1131900000	729420000	840470000	0	0	0	0	0	0	585630	769280	1555800	365930	754030000	964080000	609030000	0.00102022
60S ribosomal protein L10a	RPL10A		0	5725700	0	20803000	338360000	2492900000	2094200000	0.0169219	0	0.00993363	0	0	0	170730000	185830000	0	7887500	601680000	838260000	516410000	0.308852	0	0.0152737	0.918743	0	0	111760000	21982000	0	0	1131900000	729420000	840470000	0.0194204	0	0	5.08416	0	0	0	8854400	15057000	5590500	754030000	964080000	609030000	0.0117428
Unconventional myosin-Ie	MYO1E		241100000	33874000	46677000	34120000	338360000	2492900000	2094200000	0.100112	0.018724	0.0162926	7.11755	1.14923	0.18703	1126000000	887610000	0	11379000	601680000	838260000	516410000	1.47522	0	0.0220348	1.26858	0	0	483490000	113340000	0	0	1131900000	729420000	840470000	0.100133	0	0	4.26584	0	0	0	140590000	255600000	40661000	754030000	964080000	609030000	0.186451
Myosin-14	MYH14		31256000	47376000	48157000	10356000	338360000	2492900000	2094200000	0.140017	0.0193177	0.00494509	0.659743	3.90644	0.137967	116720000	1224300000	36497000	50948000	601680000	838260000	516410000	2.0348	0.043539	0.098658	0.0953361	0.441312	0.0213972	16943000	24695000	0	0	1131900000	729420000	840470000	0.0218173	0	0	0.68609	0	0	0	22263000	34773000	15668000	754030000	964080000	609030000	0.0295254
Gelsolin	GSN		1429500000	501490000	208890000	360770000	338360000	2492900000	2094200000	1.48212	0.083794	0.172271	2.85051	0.486408	0.0565366	8818300000	7664900000	64746000	13824000	601680000	838260000	516410000	12.7392	0.0772386	0.0267694	1.15048	2.88533	0.00606308	4111200000	1229400000	12754000	36391000	1131900000	729420000	840470000	1.08614	0.0174851	0.0432984	3.34407	0.403829	0.0160984	0	188310000	387090000	68631000	754030000	964080000	609030000	0.249738
Unconventional myosin-Ic	MYO1C		5435500000	1111600000	926180000	834180000	338360000	2492900000	2094200000	3.28526	0.371527	0.398329	4.8898	0.932715	0.113089	22339000000	21376000000	371650000	238160000	601680000	838260000	516410000	35.5272	0.443359	0.461184	1.04505	0.961349	0.0124794	9060000000	3886700000	105920000	70509000	1131900000	729420000	840470000	3.43378	0.145211	0.0838923	2.33103	1.73092	0.042289	141780000	2044000000	3566900000	552260000	754030000	964080000	609030000	2.71077
Myosin light polypeptide 6	MYL6		4888800000	456470000	757410000	1042000000	338360000	2492900000	2094200000	1.34907	0.303827	0.497565	10.71	0.610628	0.225213	14069000000	10209000000	1046600000	553300000	601680000	838260000	516410000	16.9675	1.24854	1.07144	1.3781	1.1653	0.0735842	7747600000	2175300000	228960000	260050000	1131900000	729420000	840470000	1.92181	0.313893	0.30941	3.56162	1.01449	0.163332	61498000	1090800000	1699800000	911780000	754030000	964080000	609030000	1.44663
Actin, cytoplasmic 2;Actin, cytoplasmic 2, N-terminally processed	ACTG1		101440000000	24301000000	16788000000	14765000000	338360000	2492900000	2094200000	71.82	6.73433	7.05042	4.17431	0.955166	0.0937668	204450000000	188750000000	2863200000	2401100000	601680000	838260000	516410000	313.705	3.41565	4.6496	1.08318	0.734611	0.0108881	154000000000	59771000000	995120000	1144700000	1131900000	729420000	840470000	52.8059	1.36426	1.36198	2.5765	1.00168	0.0258354	883060000	6906100000	13814000000	3478000000	754030000	964080000	609030000	9.15892
Tubulin beta-4A chain	TUBB4A		0	0	0	0	338360000	2492900000	2094200000	0	0	0	0	0	0	0	0	0	0	601680000	838260000	516410000	0	0	0	0	0	0	0	0	0	0	1131900000	729420000	840470000	0	0	0	0	0	0	0	0	0	0	754030000	964080000	609030000	0
Dolichyl-diphosphooligosaccharide--protein glycosyltransferase subunit 2	RPN2		0	0	0	0	338360000	2492900000	2094200000	0	0	0	0	0	0	0	0	0	0	601680000	838260000	516410000	0	0	0	0	0	0	0	0	0	0	1131900000	729420000	840470000	0	0	0	0	0	0	0	0	0	0	754030000	964080000	609030000	0
Glutathione S-transferase Mu 3	GSTM3		0	0	0	0	338360000	2492900000	2094200000	0	0	0	0	0	0	0	0	0	0	601680000	838260000	516410000	0	0	0	0	0	0	0	0	0	0	1131900000	729420000	840470000	0	0	0	0	0	0	0	0	0	0	754030000	964080000	609030000	0
Protein disulfide-isomerase A3	PDIA3		0	0	0	0	338360000	2492900000	2094200000	0	0	0	0	0	0	0	0	0	0	601680000	838260000	516410000	0	0	0	0	0	0	0	0	0	0	1131900000	729420000	840470000	0	0	0	0	0	0	0	0	0	0	754030000	964080000	609030000	0
60S ribosomal protein L27a	RPL27A		0	0	0	0	338360000	2492900000	2094200000	0	0	0	0	0	0	0	0	0	0	601680000	838260000	516410000	0	0	0	0	0	0	0	0	0	0	1131900000	729420000	840470000	0	0	0	0	0	0	0	0	0	0	754030000	964080000	609030000	0
ADP-ribosylation factor 5;ADP-ribosylation factor 1;ADP-ribosylation factor 3	ARF5;ARF1;ARF3		0	0	0	0	338360000	2492900000	2094200000	0	0	0	0	0	0	0	0	0	0	601680000	838260000	516410000	0	0	0	0	0	0	0	0	0	0	1131900000	729420000	840470000	0	0	0	0	0	0	0	0	0	0	754030000	964080000	609030000	0
40S ribosomal protein S13	RPS13		0	0	0	0	338360000	2492900000	2094200000	0	0	0	0	0	0	0	0	0	0	601680000	838260000	516410000	0	0	0	0	0	0	0	0	0	0	1131900000	729420000	840470000	0	0	0	0	0	0	0	0	0	0	754030000	964080000	609030000	0
Baculoviral IAP repeat-containing protein 2	BIRC2		0	0	0	0	338360000	2492900000	2094200000	0	0	0	0	0	0	0	0	0	0	601680000	838260000	516410000	0	0	0	0	0	0	0	0	0	0	1131900000	729420000	840470000	0	0	0	0	0	0	0	0	0	0	754030000	964080000	609030000	0
Laminin subunit beta-3	LAMB3		0	0	0	0	338360000	2492900000	2094200000	0	0	0	0	0	0	0	0	0	0	601680000	838260000	516410000	0	0	0	0	0	0	0	0	0	0	1131900000	729420000	840470000	0	0	0	0	0	0	0	0	0	0	754030000	964080000	609030000	0
Caprin-1	CAPRIN1		0	0	0	0	338360000	2492900000	2094200000	0	0	0	0	0	0	0	0	0	0	601680000	838260000	516410000	0	0	0	0	0	0	0	0	0	0	1131900000	729420000	840470000	0	0	0	0	0	0	0	0	0	0	754030000	964080000	609030000	0
Plectin	PLEC		0	0	0	0	338360000	2492900000	2094200000	0	0	0	0	0	0	0	0	0	0	601680000	838260000	516410000	0	0	0	0	0	0	0	0	0	0	1131900000	729420000	840470000	0	0	0	0	0	0	0	0	0	0	754030000	964080000	609030000	0
Girdin	CCDC88A		0	0	0	0	338360000	2492900000	2094200000	0	0	0	0	0	0	0	0	0	0	601680000	838260000	516410000	0	0	0	0	0	0	0	0	0	0	1131900000	729420000	840470000	0	0	0	0	0	0	0	0	0	0	754030000	964080000	609030000	0
DCC-interacting protein 13-beta	APPL2		0	0	0	0	338360000	2492900000	2094200000	0	0	0	0	0	0	0	0	0	0	601680000	838260000	516410000	0	0	0	0	0	0	0	0	0	0	1131900000	729420000	840470000	0	0	0	0	0	0	0	0	0	0	754030000	964080000	609030000	0
Exosome complex component RRP43	EXOSC8		0	0	0	0	338360000	2492900000	2094200000	0	0	0	0	0	0	0	0	0	0	601680000	838260000	516410000	0	0	0	0	0	0	0	0	0	0	1131900000	729420000	840470000	0	0	0	0	0	0	0	0	0	0	754030000	964080000	609030000	0
3-hydroxyacyl-CoA dehydrogenase type-2	HSD17B10		0	0	0	0	338360000	2492900000	2094200000	0	0	0	0	0	0	0	0	0	0	601680000	838260000	516410000	0	0	0	0	0	0	0	0	0	0	1131900000	729420000	840470000	0	0	0	0	0	0	0	0	0	0	754030000	964080000	609030000	0
Protein LSM14 homolog B	LSM14B		0	0	0	0	338360000	2492900000	2094200000	0	0	0	0	0	0	0	0	0	0	601680000	838260000	516410000	0	0	0	0	0	0	0	0	0	0	1131900000	729420000	840470000	0	0	0	0	0	0	0	0	0	0	754030000	964080000	609030000	0
E3 ubiquitin-protein ligase Praja-2	PJA2		0	0	0	0	338360000	2492900000	2094200000	0	0	0	0	0	0	1546100	0	0	0	601680000	838260000	516410000	0	0	0	∞	0	0	0	0	0	0	1131900000	729420000	840470000	0	0	0	0	0	0	0	0	0	0	754030000	964080000	609030000	0
Tropomodulin-2	TMOD2		0	0	0	0	338360000	2492900000	2094200000	0	0	0	0	0	0	18157000	0	0	0	601680000	838260000	516410000	0	0	0	∞	0	0	0	0	0	0	1131900000	729420000	840470000	0	0	0	0	0	0	0	0	0	0	754030000	964080000	609030000	0
Centrosomal protein of 290 kDa	CEP290		0	0	0	0	338360000	2492900000	2094200000	0	0	0	0	0	0	0	0	0	0	601680000	838260000	516410000	0	0	0	0	0	0	0	0	0	0	1131900000	729420000	840470000	0	0	0	0	0	0	0	0	0	0	754030000	964080000	609030000	0
POTE ankyrin domain family member J	POTEJ		0	0	0	0	338360000	2492900000	2094200000	0	0	0	0	0	0	14285000	0	0	0	601680000	838260000	516410000	0	0	0	∞	0	0	0	0	0	0	1131900000	729420000	840470000	0	0	0	0	0	0	0	0	0	0	754030000	964080000	609030000	0
BMP-2-inducible protein kinase	BMP2K		0	0	0	0	338360000	2492900000	2094200000	0	0	0	0	0	0	21058000	0	0	0	601680000	838260000	516410000	0	0	0	∞	0	0	13744000	0	0	0	1131900000	729420000	840470000	0	0	0	∞	0	0	0	0	0	0	754030000	964080000	609030000	0
ATP-dependent 6-phosphofructokinase, platelet type;ATP-dependent 6-phosphofructokinase, liver type	PFKP;PFKL		0	0	0	0	338360000	2492900000	2094200000	0	0	0	0	0	0	0	0	0	0	601680000	838260000	516410000	0	0	0	0	0	0	17757000	0	0	0	1131900000	729420000	840470000	0	0	0	∞	0	0	0	0	0	0	754030000	964080000	609030000	0
Caldesmon	CALD1		0	0	0	0	338360000	2492900000	2094200000	0	0	0	0	0	0	0	0	0	0	601680000	838260000	516410000	0	0	0	0	0	0	18323000	0	0	0	1131900000	729420000	840470000	0	0	0	∞	0	0	0	0	0	0	754030000	964080000	609030000	0
Zyxin	ZYX		0	0	0	0	338360000	2492900000	2094200000	0	0	0	0	0	0	0	0	0	0	601680000	838260000	516410000	0	0	0	0	0	0	0	0	0	0	1131900000	729420000	840470000	0	0	0	0	0	0	1465500	0	0	0	754030000	964080000	609030000	0
26S proteasome non-ATPase regulatory subunit 7	PSMD7		0	0	0	0	338360000	2492900000	2094200000	0	0	0	0	0	0	0	0	0	0	601680000	838260000	516410000	0	0	0	0	0	0	0	0	0	0	1131900000	729420000	840470000	0	0	0	0	0	0	4060800	0	0	0	754030000	964080000	609030000	0
Transcription factor E2F7	E2F7		0	0	0	0	338360000	2492900000	2094200000	0	0	0	0	0	0	0	0	0	0	601680000	838260000	516410000	0	0	0	0	0	0	0	0	0	0	1131900000	729420000	840470000	0	0	0	0	0	0	11708000	0	0	0	754030000	964080000	609030000	0
Non-POU domain-containing octamer-binding protein	NONO		0	0	0	0	338360000	2492900000	2094200000	0	0	0	0	0	0	0	0	0	0	601680000	838260000	516410000	0	0	0	0	0	0	0	0	0	0	1131900000	729420000	840470000	0	0	0	0	0	0	17072000	0	0	0	754030000	964080000	609030000	0
Rho GTPase-activating protein 22	ARHGAP22		0	0	0	0	338360000	2492900000	2094200000	0	0	0	0	0	0	0	0	0	0	601680000	838260000	516410000	0	0	0	0	0	0	0	0	0	0	1131900000	729420000	840470000	0	0	0	0	0	0	6899100	0	0	0	754030000	964080000	609030000	0
Electron transfer flavoprotein subunit alpha, mitochondrial	ETFA		0	0	0	9508500	338360000	2492900000	2094200000	0	0	0.0045404	0	0	0	24595000	0	0	0	601680000	838260000	516410000	0	0	0	∞	0	0	0	0	0	0	1131900000	729420000	840470000	0	0	0	0	0	0	0	0	0	0	754030000	964080000	609030000	0
60S ribosomal protein L28	RPL28		1688500	176770	0	0	338360000	2492900000	2094200000	0.000522432	0	0	9.55196	0	0	33313000	0	0	0	601680000	838260000	516410000	0	0	0	∞	0	0	0	0	0	0	1131900000	729420000	840470000	0	0	0	0	0	0	0	0	0	0	754030000	964080000	609030000	0
Serine/threonine-protein phosphatase PGAM5, mitochondrial	PGAM5		0	1141300	0	0	338360000	2492900000	2094200000	0.00337303	0	0	0	0	0	0	0	0	0	601680000	838260000	516410000	0	0	0	0	0	0	10145000	0	0	0	1131900000	729420000	840470000	0	0	0	∞	0	0	0	0	0	0	754030000	964080000	609030000	0
Putative SAGE1-like protein			0	0	0	0	338360000	2492900000	2094200000	0	0	0	0	0	0	0	0	0	12297000000	601680000	838260000	516410000	0	0	23.8125	0	0	0	0	0	0	0	1131900000	729420000	840470000	0	0	0	0	0	0	0	0	0	0	754030000	964080000	609030000	0
ER lumen protein-retaining receptor 2	KDELR2		0	0	0	0	338360000	2492900000	2094200000	0	0	0	0	0	0	0	3071700	0	0	601680000	838260000	516410000	0.00510521	0	0	0	0	0	0	0	0	0	1131900000	729420000	840470000	0	0	0	0	0	0	0	0	0	0	754030000	964080000	609030000	0
Protein EFR3 homolog A	EFR3A		0	0	0	0	338360000	2492900000	2094200000	0	0	0	0	0	0	0	3587200	0	0	601680000	838260000	516410000	0.00596197	0	0	0	0	0	0	0	0	0	1131900000	729420000	840470000	0	0	0	0	0	0	0	0	0	0	754030000	964080000	609030000	0
Inverted formin-2	INF2		0	0	0	0	338360000	2492900000	2094200000	0	0	0	0	0	0	6250500	6706900	0	0	601680000	838260000	516410000	0.011147	0	0	0.931951	0	0	4197100	0	0	0	1131900000	729420000	840470000	0	0	0	∞	0	0	0	0	0	0	754030000	964080000	609030000	0
AP-2 complex subunit sigma	AP2S1		0	0	0	0	338360000	2492900000	2094200000	0	0	0	0	0	0	0	7712800	0	0	601680000	838260000	516410000	0.0128188	0	0	0	0	0	0	0	0	0	1131900000	729420000	840470000	0	0	0	0	0	0	0	0	0	0	754030000	964080000	609030000	0
D-3-phosphoglycerate dehydrogenase	PHGDH		6148900	0	0	0	338360000	2492900000	2094200000	0	0	0	∞	0	0	15667000	9445900	0	0	601680000	838260000	516410000	0.0156992	0	0	1.6586	0	0	5179200	0	0	0	1131900000	729420000	840470000	0	0	0	∞	0	0	0	0	0	0	754030000	964080000	609030000	0
Protein SGT1	ECD		0	0	0	0	338360000	2492900000	2094200000	0	0	0	0	0	0	31898000	9899000	0	0	601680000	838260000	516410000	0.0164523	0	0	3.22235	0	0	0	0	0	0	1131900000	729420000	840470000	0	0	0	0	0	0	0	0	0	0	754030000	964080000	609030000	0
Neuron-specific calcium-binding protein hippocalcin;Neurocalcin-delta;Hippocalcin-like protein 1	HPCA;NCALD;HPCAL1		0	0	0	0	338360000	2492900000	2094200000	0	0	0	0	0	0	10766000	10025000	0	0	601680000	838260000	516410000	0.0166617	0	0	1.07392	0	0	0	0	0	0	1131900000	729420000	840470000	0	0	0	0	0	0	0	0	0	0	754030000	964080000	609030000	0
ADP/ATP translocase 3;ADP/ATP translocase 3, N-terminally processed	SLC25A6		0	0	0	0	338360000	2492900000	2094200000	0	0	0	0	0	0	15975000	10234000	0	0	601680000	838260000	516410000	0.017009	0	0	1.56097	0	0	0	0	0	0	1131900000	729420000	840470000	0	0	0	0	0	0	0	0	0	0	754030000	964080000	609030000	0
V-type proton ATPase 116 kDa subunit a isoform 1	ATP6V0A1		0	0	0	0	338360000	2492900000	2094200000	0	0	0	0	0	0	0	10305000	0	0	601680000	838260000	516410000	0.017127	0	0	0	0	0	0	0	0	0	1131900000	729420000	840470000	0	0	0	0	0	0	0	0	0	0	754030000	964080000	609030000	0
AP-1 complex subunit beta-1	AP1B1		0	0	0	0	338360000	2492900000	2094200000	0	0	0	0	0	0	26317000	10479000	0	0	601680000	838260000	516410000	0.0174162	0	0	2.5114	0	0	0	0	0	0	1131900000	729420000	840470000	0	0	0	0	0	0	0	0	0	0	754030000	964080000	609030000	0
Flotillin-1	FLOT1		0	0	0	0	338360000	2492900000	2094200000	0	0	0	0	0	0	16231000	10599000	0	0	601680000	838260000	516410000	0.0176157	0	0	1.53137	0	0	0	0	0	0	1131900000	729420000	840470000	0	0	0	0	0	0	0	0	0	0	754030000	964080000	609030000	0
Tight junction protein ZO-2	TJP2		0	0	0	0	338360000	2492900000	2094200000	0	0	0	0	0	0	18607000	11492000	0	0	601680000	838260000	516410000	0.0190999	0	0	1.61913	0	0	7406500	0	0	0	1131900000	729420000	840470000	0	0	0	∞	0	0	0	0	0	0	754030000	964080000	609030000	0
60S ribosomal protein L18a	RPL18A		0	0	0	0	338360000	2492900000	2094200000	0	0	0	0	0	0	8370500	13476000	0	0	601680000	838260000	516410000	0.0223973	0	0	0.621141	0	0	0	0	0	0	1131900000	729420000	840470000	0	0	0	0	0	0	0	0	0	0	754030000	964080000	609030000	0
Protein-methionine sulfoxide oxidase MICAL3	MICAL3		0	0	0	0	338360000	2492900000	2094200000	0	0	0	0	0	0	0	14903000	0	0	601680000	838260000	516410000	0.024769	0	0	0	0	0	0	0	0	0	1131900000	729420000	840470000	0	0	0	0	0	0	0	0	0	0	754030000	964080000	609030000	0
Ras-related protein R-Ras2	RRAS2		8690500	298140	0	0	338360000	2492900000	2094200000	0.000881133	0	0	29.1491	0	0	44714000	16302000	0	0	601680000	838260000	516410000	0.0270941	0	0	2.74285	0	0	16469000	0	0	0	1131900000	729420000	840470000	0	0	0	∞	0	0	0	0	0	0	754030000	964080000	609030000	0
40S ribosomal protein S5;40S ribosomal protein S5, N-terminally processed	RPS5		0	0	0	0	338360000	2492900000	2094200000	0	0	0	0	0	0	15788000	16745000	0	0	601680000	838260000	516410000	0.0278304	0	0	0.942849	0	0	0	0	0	0	1131900000	729420000	840470000	0	0	0	0	0	0	0	0	0	0	754030000	964080000	609030000	0
40S ribosomal protein S16	RPS16		0	0	0	0	338360000	2492900000	2094200000	0	0	0	0	0	0	15788000	17387000	0	0	601680000	838260000	516410000	0.0288974	0	0	0.908035	0	0	11204000	0	0	0	1131900000	729420000	840470000	0	0	0	∞	0	0	0	0	0	0	754030000	964080000	609030000	0
Importin-5	IPO5		0	0	0	0	338360000	2492900000	2094200000	0	0	0	0	0	0	29945000	19577000	0	0	601680000	838260000	516410000	0.0325372	0	0	1.5296	0	0	24946000	0	0	0	1131900000	729420000	840470000	0	0	0	∞	0	0	0	0	0	0	754030000	964080000	609030000	0
A-kinase anchor protein 2	AKAP2		9326200	0	16293000	0	338360000	2492900000	2094200000	0	0.00653576	0	∞	∞	∞	118870000	19732000	3574800	4721300	601680000	838260000	516410000	0.0327948	0.00426455	0.00914254	6.02422	0.466451	0.130037	25440000	0	0	0	1131900000	729420000	840470000	0	0	0	∞	0	0	0	0	0	0	754030000	964080000	609030000	0
Actin filament-associated protein 1	AFAP1		0	0	0	0	338360000	2492900000	2094200000	0	0	0	0	0	0	23657000	21215000	0	0	601680000	838260000	516410000	0.0352596	0	0	1.11511	0	0	0	0	0	0	1131900000	729420000	840470000	0	0	0	0	0	0	0	0	0	0	754030000	964080000	609030000	0
AP-2 complex subunit mu	AP2M1		0	0	0	0	338360000	2492900000	2094200000	0	0	0	0	0	0	15834000	23641000	0	0	601680000	838260000	516410000	0.0392917	0	0	0.669769	0	0	0	0	0	0	1131900000	729420000	840470000	0	0	0	0	0	0	0	0	0	0	754030000	964080000	609030000	0
Junction plakoglobin	JUP		0	0	0	0	338360000	2492900000	2094200000	0	0	0	0	0	0	25122000	23766000	0	0	601680000	838260000	516410000	0.0394994	0	0	1.05706	0	0	12289000	0	0	0	1131900000	729420000	840470000	0	0	0	∞	0	0	0	0	0	0	754030000	964080000	609030000	0
Myosin regulatory light polypeptide 9	MYL9		0	0	0	0	338360000	2492900000	2094200000	0	0	0	0	0	0	14997000	25245000	0	0	601680000	838260000	516410000	0.0419575	0	0	0.594058	0	0	0	0	0	0	1131900000	729420000	840470000	0	0	0	0	0	0	0	0	0	0	754030000	964080000	609030000	0
Alpha-actinin-4	ACTN4		3334000	0	0	0	338360000	2492900000	2094200000	0	0	0	∞	0	0	16118000	25747000	0	0	601680000	838260000	516410000	0.0427918	0	0	0.626015	0	0	6630900	0	0	0	1131900000	729420000	840470000	0	0	0	∞	0	0	0	0	0	0	754030000	964080000	609030000	0
Importin-9	IPO9		0	0	0	0	338360000	2492900000	2094200000	0	0	0	0	0	0	37201000	27023000	0	0	601680000	838260000	516410000	0.0449126	0	0	1.37664	0	0	0	0	0	0	1131900000	729420000	840470000	0	0	0	0	0	0	0	0	0	0	754030000	964080000	609030000	0
Filamin-C	FLNC		0	0	0	0	338360000	2492900000	2094200000	0	0	0	0	0	0	0	27119000	0	0	601680000	838260000	516410000	0.0450721	0	0	0	0	0	0	0	0	0	1131900000	729420000	840470000	0	0	0	0	0	0	0	0	0	0	754030000	964080000	609030000	0
Supervillin	SVIL		0	171990	0	0	338360000	2492900000	2094200000	0.000508305	0	0	0	0	0	36911000	37055000	0	0	601680000	838260000	516410000	0.0615859	0	0	0.996114	0	0	3290900	0	0	0	1131900000	729420000	840470000	0	0	0	∞	0	0	0	0	0	0	754030000	964080000	609030000	0
CD59 glycoprotein	CD59		77381000	655570	0	0	338360000	2492900000	2094200000	0.00193749	0	0	118.036	0	0	142500000	38707000	0	0	601680000	838260000	516410000	0.0643315	0	0	3.6815	0	0	35262000	0	0	0	1131900000	729420000	840470000	0	0	0	∞	0	0	0	0	0	0	754030000	964080000	609030000	0
Melanotransferrin	MFI2		0	910450	0	0	338360000	2492900000	2094200000	0.00269077	0	0	0	0	0	22538000	40549000	0	0	601680000	838260000	516410000	0.067393	0	0	0.555821	0	0	11982000	0	0	0	1131900000	729420000	840470000	0	0	0	∞	0	0	0	0	0	0	754030000	964080000	609030000	0
Fragile X mental retardation syndrome-related protein 1	FXR1		0	0	0	0	338360000	2492900000	2094200000	0	0	0	0	0	0	25926000	41070000	0	0	601680000	838260000	516410000	0.0682589	0	0	0.631264	0	0	19507000	0	0	0	1131900000	729420000	840470000	0	0	0	∞	0	0	0	0	0	0	754030000	964080000	609030000	0
Unconventional myosin-Va	MYO5A		0	0	0	0	338360000	2492900000	2094200000	0	0	0	0	0	0	6265000	41814000	0	0	601680000	838260000	516410000	0.0694954	0	0	0.14983	0	0	0	0	0	0	1131900000	729420000	840470000	0	0	0	0	0	0	0	0	0	0	754030000	964080000	609030000	0
Lactadherin;Lactadherin short form;Medin	MFGE8		0	0	0	0	338360000	2492900000	2094200000	0	0	0	0	0	0	43331000	42577000	0	0	601680000	838260000	516410000	0.0707635	0	0	1.01771	0	0	21754000	0	0	0	1131900000	729420000	840470000	0	0	0	∞	0	0	0	0	0	0	754030000	964080000	609030000	0
60S ribosomal protein L21	RPL21		0	0	0	0	338360000	2492900000	2094200000	0	0	0	0	0	0	27911000	55812000	0	0	601680000	838260000	516410000	0.0927603	0	0	0.50009	0	0	0	0	0	0	1131900000	729420000	840470000	0	0	0	0	0	0	0	0	0	0	754030000	964080000	609030000	0
Guanine nucleotide-binding protein G(I)/G(S)/G(T) subunit beta-1	GNB1		4557000	0	0	0	338360000	2492900000	2094200000	0	0	0	∞	0	0	64061000	57339000	0	0	601680000	838260000	516410000	0.0952982	0	0	1.11723	0	0	0	0	0	0	1131900000	729420000	840470000	0	0	0	0	0	0	0	0	0	0	754030000	964080000	609030000	0
Phostensin	PPP1R18		0	0	0	0	338360000	2492900000	2094200000	0	0	0	0	0	0	102380000	75558000	0	0	601680000	838260000	516410000	0.125578	0	0	1.35499	0	0	0	0	0	0	1131900000	729420000	840470000	0	0	0	0	0	0	0	0	0	0	754030000	964080000	609030000	0
F-actin-capping protein subunit beta	CAPZB		32544000	0	0	0	338360000	2492900000	2094200000	0	0	0	∞	0	0	40582000	79785000	0	0	601680000	838260000	516410000	0.132604	0	0	0.508642	0	0	24236000	0	0	0	1131900000	729420000	840470000	0	0	0	∞	0	0	0	0	0	0	754030000	964080000	609030000	0
Guanine nucleotide-binding protein G(k) subunit alpha	GNAI3		11839000	0	0	0	338360000	2492900000	2094200000	0	0	0	∞	0	0	88977000	87603000	0	0	601680000	838260000	516410000	0.145597	0	0	1.01568	0	0	31799000	0	0	0	1131900000	729420000	840470000	0	0	0	∞	0	0	0	0	0	0	754030000	964080000	609030000	0
Allograft inflammatory factor 1-like	AIF1L		7585800	2621500	0	0	338360000	2492900000	2094200000	0.00774767	0	0	2.89369	0	0	190070000	125360000	0	0	601680000	838260000	516410000	0.20835	0	0	1.51619	0	0	33364000	0	0	0	1131900000	729420000	840470000	0	0	0	∞	0	0	0	0	0	0	754030000	964080000	609030000	0
Clathrin interactor 1	CLINT1		4500800	1099700	0	0	338360000	2492900000	2094200000	0.00325009	0	0	4.09275	0	0	152160000	162850000	0	0	601680000	838260000	516410000	0.270659	0	0	0.934357	0	0	46194000	0	0	0	1131900000	729420000	840470000	0	0	0	∞	0	0	0	0	0	0	754030000	964080000	609030000	0
C2 domain-containing protein 3	C2CD3		22744000	0	0	26050000	338360000	2492900000	2094200000	0	0	0.0124391	∞	0	0	45626000	16349000	36025000	31623000	601680000	838260000	516410000	0.0271723	0.0429759	0.0612362	2.79075	0.701806	1.58161	30789000	0	0	24473000	1131900000	729420000	840470000	0	0	0.0291182	∞	0	0	0	0	0	0	754030000	964080000	609030000	0
Haptoglobin-related protein;Haptoglobin;Haptoglobin alpha chain;Haptoglobin beta chain	HPR;HP		6543000	0	5118800	0	338360000	2492900000	2094200000	0	0.00205335	0	∞	∞	∞	0	0	0	0	601680000	838260000	516410000	0	0	0	0	0	0	0	0	2635100	5066700	1131900000	729420000	840470000	0	0.0036126	0.00602841	0	0.599262	∞	0	0	0	0	754030000	964080000	609030000	0
TGF-beta-activated kinase 1 and MAP3K7-binding protein 2	TAB2		3896700	319290	3748300	0	338360000	2492900000	2094200000	0.00094364	0.00150359	0	12.2043	∞	1.59339	10126000	3629100	0	0	601680000	838260000	516410000	0.00603161	0	0	2.79022	0	0	8993200	0	2967100	2919600	1131900000	729420000	840470000	0	0.00406775	0.00347377	∞	1.17099	∞	0	0	0	0	754030000	964080000	609030000	0
Probable ATP-dependent RNA helicase DDX5;Probable ATP-dependent RNA helicase DDX17	DDX5;DDX17		0	0	0	0	338360000	2492900000	2094200000	0	0	0	0	0	0	20117000	37131000	0	0	601680000	838260000	516410000	0.0617122	0	0	0.541784	0	0	71052000	0	8193800	13014000	1131900000	729420000	840470000	0	0.0112333	0.0154842	∞	0.725469	∞	7733100	0	0	0	754030000	964080000	609030000	0
Progesterone-induced-blocking factor 1	PIBF1		0	0	0	0	338360000	2492900000	2094200000	0	0	0	0	0	0	23877000	23245000	0	0	601680000	838260000	516410000	0.0386335	0	0	1.02719	0	0	20902000	0	22314000	19439000	1131900000	729420000	840470000	0	0.0305914	0.0231287	∞	1.32266	∞	0	0	0	0	754030000	964080000	609030000	0
Titin	TTN		0	0	0	0	338360000	2492900000	2094200000	0	0	0	0	0	0	0	10371000	0	0	601680000	838260000	516410000	0.0172367	0	0	0	0	0	237520000	0	148910000	0	1131900000	729420000	840470000	0	0.204149	0	∞	∞	∞	0	0	0	0	754030000	964080000	609030000	0
Prolyl 4-hydroxylase subunit alpha-2	P4HA2		0	0	0	0	338360000	2492900000	2094200000	0	0	0	0	0	0	6853300	17337000	0	0	601680000	838260000	516410000	0.0288143	0	0	0.395299	0	0	0	1009600	0	0	1131900000	729420000	840470000	0.000891952	0	0	0	0	0	0	0	0	0	754030000	964080000	609030000	0
Cytospin-A	SPECC1L		0	0	0	0	338360000	2492900000	2094200000	0	0	0	0	0	0	174320000	44001000	0	0	601680000	838260000	516410000	0.0731302	0	0	3.96173	0	0	14294000	2668200	1560500	0	1131900000	729420000	840470000	0.00235728	0.00213937	0	5.35717	∞	0.907561	0	0	0	0	754030000	964080000	609030000	0
Eukaryotic translation initiation factor 3 subunit F	EIF3F		4852600	0	0	0	338360000	2492900000	2094200000	0	0	0	∞	0	0	0	5511900	0	0	601680000	838260000	516410000	0.00916085	0	0	0	0	0	0	3268900	1399800	0	1131900000	729420000	840470000	0.00288798	0.00191906	0	0	∞	0.6645	0	0	0	0	754030000	964080000	609030000	0
NEDD4 family-interacting protein 1	NDFIP1		0	0	0	0	338360000	2492900000	2094200000	0	0	0	0	0	0	11780000	13634000	0	0	601680000	838260000	516410000	0.0226599	0	0	0.864016	0	0	9085100	3874400	0	0	1131900000	729420000	840470000	0.00342292	0	0	2.34491	0	0	0	0	0	0	754030000	964080000	609030000	0
Phosphoprotein associated with glycosphingolipid-enriched microdomains 1	PAG1		0	0	0	0	338360000	2492900000	2094200000	0	0	0	0	0	0	12869000	17059000	0	0	601680000	838260000	516410000	0.0283523	0	0	0.754382	0	0	13362000	3888000	0	0	1131900000	729420000	840470000	0.00343493	0	0	3.43673	0	0	0	0	0	0	754030000	964080000	609030000	0
Unconventional myosin-Id	MYO1D		0	0	0	0	338360000	2492900000	2094200000	0	0	0	0	0	0	88070000	52940000	0	0	601680000	838260000	516410000	0.087987	0	0	1.66358	0	0	7353000	4180300	0	0	1131900000	729420000	840470000	0.00369317	0	0	1.75896	0	0	0	0	0	0	754030000	964080000	609030000	0
Eukaryotic translation initiation factor 5B	EIF5B		59874000	206680000	0	0	338360000	2492900000	2094200000	0.610829	0	0	0.289694	0	0	8962300	4700300	0	0	601680000	838260000	516410000	0.00781196	0	0	1.90675	0	0	131530000	4191800	0	0	1131900000	729420000	840470000	0.00370333	0	0	31.3779	0	0	0	0	0	0	754030000	964080000	609030000	0
BAG family molecular chaperone regulator 2	BAG2		12995000	0	0	0	338360000	2492900000	2094200000	0	0	0	∞	0	0	60568000	70796000	0	0	601680000	838260000	516410000	0.117664	0	0	0.855529	0	0	22315000	4533300	0	0	1131900000	729420000	840470000	0.00400504	0	0	4.92246	0	0	0	0	0	0	754030000	964080000	609030000	0
RNA-binding protein FUS	FUS		0	704830	0	1297400	338360000	2492900000	2094200000	0.00208308	0	0.000619521	0	0	0	31579000	35648000	0	0	601680000	838260000	516410000	0.0592474	0	0	0.885856	0	0	55235000	4950100	0	0	1131900000	729420000	840470000	0.00437327	0	0	11.1584	0	0	1490800	0	0	0	754030000	964080000	609030000	0
Leucine-rich repeat and calponin homology domain-containing protein 3	LRCH3		0	0	0	0	338360000	2492900000	2094200000	0	0	0	0	0	0	14658000	48877000	0	0	601680000	838260000	516410000	0.0812342	0	0	0.299896	0	0	9808200	5936400	0	0	1131900000	729420000	840470000	0.00524463	0	0	1.65221	0	0	0	0	0	0	754030000	964080000	609030000	0
AP-2 complex subunit alpha-1	AP2A1		11960000	0	0	0	338360000	2492900000	2094200000	0	0	0	∞	0	0	480320000	555160000	0	0	601680000	838260000	516410000	0.922683	0	0	0.865192	0	0	97762000	6563500	0	0	1131900000	729420000	840470000	0.00579866	0	0	14.8948	0	0	0	0	0	0	754030000	964080000	609030000	0
EF-hand domain-containing protein D1	EFHD1		14025000	0	0	0	338360000	2492900000	2094200000	0	0	0	∞	0	0	52916000	75971000	0	0	601680000	838260000	516410000	0.126265	0	0	0.696529	0	0	10971000	6622100	0	0	1131900000	729420000	840470000	0.00585043	0	0	1.65673	0	0	0	0	0	0	754030000	964080000	609030000	0
40S ribosomal protein S14	RPS14		0	0	0	3614400	338360000	2492900000	2094200000	0	0	0.00172591	0	0	0	0	7316600	0	0	601680000	838260000	516410000	0.0121603	0	0	0	0	0	0	7492600	0	0	1131900000	729420000	840470000	0.00661949	0	0	0	0	0	0	0	0	0	754030000	964080000	609030000	0
14-3-3 protein gamma;14-3-3 protein gamma, N-terminally processed	YWHAG		0	0	0	0	338360000	2492900000	2094200000	0	0	0	0	0	0	0	8565300	0	0	601680000	838260000	516410000	0.0142356	0	0	0	0	0	14929000	8176100	0	0	1131900000	729420000	840470000	0.00722334	0	0	1.82593	0	0	0	0	0	0	754030000	964080000	609030000	0
Protein phosphatase 1G	PPM1G		0	0	0	0	338360000	2492900000	2094200000	0	0	0	0	0	0	34853000	31155000	0	0	601680000	838260000	516410000	0.05178	0	0	1.1187	0	0	0	8238700	6127600	0	1131900000	729420000	840470000	0.00727865	0.00840065	0	0	∞	1.15415	6283900	0	0	0	754030000	964080000	609030000	0
60S ribosomal protein L6	RPL6		0	0	0	0	338360000	2492900000	2094200000	0	0	0	0	0	0	37958000	261200000	0	0	601680000	838260000	516410000	0.434118	0	0	0.145322	0	0	73177000	8679300	1424400	4087700	1131900000	729420000	840470000	0.0076679	0.00195278	0.00486359	8.43121	0.401511	0.25467	0	0	0	0	754030000	964080000	609030000	0
LIM and calponin homology domains-containing protein 1	LIMCH1		6276300	319840	0	0	338360000	2492900000	2094200000	0.000945265	0	0	19.6232	0	0	542740000	284850000	0	0	601680000	838260000	516410000	0.473424	0	0	1.90535	0	0	176990000	8728600	0	0	1131900000	729420000	840470000	0.00771146	0	0	20.277	0	0	0	0	0	0	754030000	964080000	609030000	0
Calreticulin	CALR		0	0	0	0	338360000	2492900000	2094200000	0	0	0	0	0	0	0	0	0	0	601680000	838260000	516410000	0	0	0	0	0	0	20332000	9361800	645000	0	1131900000	729420000	840470000	0.00827087	0.000884264	0	2.1718	∞	0.106913	0	0	0	0	754030000	964080000	609030000	0
Uveal autoantigen with coiled-coil domains and ankyrin repeats	UACA		2539100	0	0	0	338360000	2492900000	2094200000	0	0	0	∞	0	0	260440000	27294000	0	0	601680000	838260000	516410000	0.045363	0	0	9.54202	0	0	103560000	9547400	0	0	1131900000	729420000	840470000	0.00843484	0	0	10.8469	0	0	0	0	0	0	754030000	964080000	609030000	0
Clathrin light chain A	CLTA		0	5770300	13820000	0	338360000	2492900000	2094200000	0.0170537	0.00554374	0	0	∞	0.325075	271350000	251570000	0	0	601680000	838260000	516410000	0.418113	0	0	1.07863	0	0	107140000	11510000	0	0	1131900000	729420000	840470000	0.0101687	0	0	9.30843	0	0	0	0	0	0	754030000	964080000	609030000	0
PRKC apoptosis WT1 regulator protein	PAWR		37530000	1040300	0	0	338360000	2492900000	2094200000	0.00307454	0	0	36.0761	0	0	300740000	368460000	0	0	601680000	838260000	516410000	0.612385	0	0	0.816208	0	0	40915000	14930000	0	0	1131900000	729420000	840470000	0.0131902	0	0	2.74046	0	0	0	0	0	0	754030000	964080000	609030000	0
Importin subunit beta-1	KPNB1		24622000	451760	0	0	338360000	2492900000	2094200000	0.00133515	0	0	54.5024	0	0	101250000	164450000	0	0	601680000	838260000	516410000	0.273318	0	0	0.615689	0	0	50146000	15920000	0	0	1131900000	729420000	840470000	0.0140648	0	0	3.14987	0	0	0	0	0	0	754030000	964080000	609030000	0
60S ribosomal protein L15	RPL15		0	0	0	0	338360000	2492900000	2094200000	0	0	0	0	0	0	6588200	84880000	0	0	601680000	838260000	516410000	0.141072	0	0	0.0776178	0	0	17614000	15974000	0	0	1131900000	729420000	840470000	0.0141126	0	0	1.10267	0	0	0	0	0	0	754030000	964080000	609030000	0
Membrane-spanning 4-domains subfamily A member 10	MS4A10		32135000	14458000	104570000	72957000	338360000	2492900000	2094200000	0.0427296	0.0419471	0.0348376	2.22264	1.20407	0.981687	0	16880000	31170000	47074000	601680000	838260000	516410000	0.0280548	0.0371842	0.0911563	0	0.407917	1.32541	21070000	18699000	30517000	23134000	1131900000	729420000	840470000	0.01652	0.0418374	0.0275251	1.1268	1.51997	2.53253	0	0	0	0	754030000	964080000	609030000	0
AP-2 complex subunit beta	AP2B1		38787000	0	0	0	338360000	2492900000	2094200000	0	0	0	∞	0	0	641730000	518030000	0	0	601680000	838260000	516410000	0.860973	0	0	1.23879	0	0	195940000	21389000	0	0	1131900000	729420000	840470000	0.0188965	0	0	9.16078	0	0	0	0	0	0	754030000	964080000	609030000	0
Protein phosphatase 1 regulatory subunit 12A	PPP1R12A		23696000	0	0	0	338360000	2492900000	2094200000	0	0	0	∞	0	0	350960000	159110000	0	0	601680000	838260000	516410000	0.264443	0	0	2.20577	0	0	172280000	21616000	0	0	1131900000	729420000	840470000	0.0190971	0	0	7.97002	0	0	0	0	0	0	754030000	964080000	609030000	0
Tubulin alpha-1C chain;Tubulin alpha-8 chain	TUBA1C;TUBA8		29613000	0	0	0	338360000	2492900000	2094200000	0	0	0	∞	0	0	72518000	43246000	16047000	0	601680000	838260000	516410000	0.0718754	0.0191432	0	1.67687	∞	0.266339	52019000	23228000	0	0	1131900000	729420000	840470000	0.0205212	0	0	2.2395	0	0	18000000	0	0	0	754030000	964080000	609030000	0
Beta-actin-like protein 2	ACTBL2		0	20420000	0	0	338360000	2492900000	2094200000	0.0603499	0	0	0	0	0	139730000	43878000000	0	0	601680000	838260000	516410000	72.9258	0	0	0.00318451	0	0	0	25340000	0	0	1131900000	729420000	840470000	0.0223871	0	0	0	0	0	0	0	0	0	754030000	964080000	609030000	0
Myosin regulatory light chain 12A	MYL12A		0	0	0	0	338360000	2492900000	2094200000	0	0	0	0	0	0	119920000	113210000	0	0	601680000	838260000	516410000	0.188156	0	0	1.05927	0	0	35476000	28635000	0	0	1131900000	729420000	840470000	0.0252982	0	0	1.2389	0	0	0	0	0	0	754030000	964080000	609030000	0
Serine/threonine-protein phosphatase PP1-alpha catalytic subunit;Serine/threonine-protein phosphatase PP1-gamma catalytic subunit	PPP1CA;PPP1CC		3823000	339950	0	0	338360000	2492900000	2094200000	0.0010047	0	0	11.2458	0	0	372850000	302500000	0	0	601680000	838260000	516410000	0.502759	0	0	1.23256	0	0	133490000	35463000	0	0	1131900000	729420000	840470000	0.0313305	0	0	3.7642	0	0	0	0	0	0	754030000	964080000	609030000	0
Hydrocephalus-inducing protein homolog	HYDIN		0	0	0	0	338360000	2492900000	2094200000	0	0	0	0	0	0	36816000	28574000	19545000	0	601680000	838260000	516410000	0.0474904	0.0233162	0	1.28844	∞	0.490966	0	37111000	0	13701000	1131900000	729420000	840470000	0.0327865	0	0.0163016	0	0	0	0	0	0	0	754030000	964080000	609030000	0
Ornithine aminotransferase, mitochondrial;Ornithine aminotransferase, hepatic form;Ornithine aminotransferase, renal form	OAT		63489000	7277000	28839000	16320000	338360000	2492900000	2094200000	0.0215067	0.0115685	0.00779295	8.72461	1.48448	0.537901	15774000	20663000	8696800	0	601680000	838260000	516410000	0.0343422	0.0103748	0	0.763394	∞	0.302102	23777000	37210000	15378000	0	1131900000	729420000	840470000	0.0328739	0.0210825	0	0.638995	∞	0.641314	25914000	0	0	0	754030000	964080000	609030000	0
Leucine zipper protein 1	LUZP1		9307200	1496900	0	0	338360000	2492900000	2094200000	0.00442399	0	0	6.21765	0	0	448350000	433070000	0	0	601680000	838260000	516410000	0.719768	0	0	1.03528	0	0	233360000	37398000	0	0	1131900000	729420000	840470000	0.03304	0	0	6.23991	0	0	0	0	0	0	754030000	964080000	609030000	0
60S ribosomal protein L30	RPL30		50529000	2422900	0	23560000	338360000	2492900000	2094200000	0.00716072	0	0.0112501	20.8548	0	0	236660000	206920000	0	16207000	601680000	838260000	516410000	0.343904	0	0.031384	1.14373	0	0	112920000	38851000	0	17202000	1131900000	729420000	840470000	0.0343237	0	0.0204671	2.90649	0	0	0	0	0	0	754030000	964080000	609030000	0
Nuclear pore complex protein Nup93	NUP93		93612000	11683000	72047000	63137000	338360000	2492900000	2094200000	0.0345283	0.0289009	0.0301485	8.01267	0.958617	0.83702	40249000	25353000	48008000	29656000	601680000	838260000	516410000	0.042137	0.057271	0.0574272	1.58754	0.99728	1.35916	56555000	41706000	38637000	33239000	1131900000	729420000	840470000	0.036846	0.0529695	0.0395481	1.35604	1.33937	1.43759	0	0	0	0	754030000	964080000	609030000	0
Thioredoxin	TXN		0	0	0	0	338360000	2492900000	2094200000	0	0	0	0	0	0	0	0	0	0	601680000	838260000	516410000	0	0	0	0	0	0	0	53554000	38657000	42574000	1131900000	729420000	840470000	0.0473134	0.0529969	0.050655	0	1.04623	1.12013	0	0	0	0	754030000	964080000	609030000	0
5-nucleotidase	NT5E		579170000	70047000	15309000	0	338360000	2492900000	2094200000	0.207019	0.00614104	0	8.26831	∞	0.0296641	1909700000	1869400000	0	0	601680000	838260000	516410000	3.10697	0	0	1.02156	0	0	717410000	96623000	0	0	1131900000	729420000	840470000	0.0853635	0	0	7.42484	0	0	0	0	0	0	754030000	964080000	609030000	0
Actin, cytoplasmic 1;Actin, cytoplasmic 1, N-terminally processed	ACTB		355380000	78369000	0	0	338360000	2492900000	2094200000	0.231614	0	0	4.5347	0	0	1033000000	776010000	0	0	601680000	838260000	516410000	1.28974	0	0	1.33117	0	0	564130000	370000000	0	0	1131900000	729420000	840470000	0.326884	0	0	1.52468	0	0	0	0	0	0	754030000	964080000	609030000	0
Spectrin beta chain, non-erythrocytic 1	SPTBN1		0	857470	0	0	338360000	2492900000	2094200000	0.00253419	0	0	0	0	0	9286100	177570000	0	0	601680000	838260000	516410000	0.295124	0	0	0.0522954	0	0	16752000	0	0	0	1131900000	729420000	840470000	0	0	0	∞	0	0	0	0	0	1239500	754030000	964080000	609030000	0
Zinc finger protein RFP	TRIM27		0	0	0	0	338360000	2492900000	2094200000	0	0	0	0	0	0	0	0	0	0	601680000	838260000	516410000	0	0	0	0	0	0	0	0	0	0	1131900000	729420000	840470000	0	0	0	0	0	0	3074600	0	0	3696200	754030000	964080000	609030000	0
40S ribosomal protein S10	RPS10		0	0	0	0	338360000	2492900000	2094200000	0	0	0	0	0	0	0	0	0	0	601680000	838260000	516410000	0	0	0	0	0	0	7797300	0	0	0	1131900000	729420000	840470000	0	0	0	∞	0	0	0	0	0	8362500	754030000	964080000	609030000	0
Constitutive coactivator of PPAR-gamma-like protein 1	FAM120A		0	0	186970000	276330000	338360000	2492900000	2094200000	0	0.075001	0.13195	0	0.568404	∞	106340000	95305000	115020000	109210000	601680000	838260000	516410000	0.158398	0.137213	0.211479	1.11579	0.648824	0.866253	0	0	0	164460000	1131900000	729420000	840470000	0	0	0.195676	0	0	0	22975000	408150	0	0	754030000	964080000	609030000	0.000541291
General transcription factor IIF subunit 1	GTF2F1		1654700	0	1860000	0	338360000	2492900000	2094200000	0	0.000746119	0	∞	∞	∞	0	0	0	0	601680000	838260000	516410000	0	0	0	0	0	0	3286900	3407900	0	0	1131900000	729420000	840470000	0.00301078	0	0	0.964494	0	0	868730	616740	0	0	754030000	964080000	609030000	0.000817925
Annexin A6	ANXA6		0	132290	0	0	338360000	2492900000	2094200000	0.000390974	0	0	0	0	0	0	0	0	0	601680000	838260000	516410000	0	0	0	0	0	0	8451500	1625200	0	0	1131900000	729420000	840470000	0.00143582	0	0	5.20028	0	0	326590	637230	0	751440	754030000	964080000	609030000	0.000845099
Death-associated protein kinase 3	DAPK3		4555600	0	0	0	338360000	2492900000	2094200000	0	0	0	∞	0	0	39485000	42552000	0	0	601680000	838260000	516410000	0.070722	0	0	0.927923	0	0	0	5685700	0	0	1131900000	729420000	840470000	0.00502315	0	0	0	0	0	0	1226400	0	0	754030000	964080000	609030000	0.00162646
Ubiquitin carboxyl-terminal hydrolase 15	USP15		0	0	0	0	338360000	2492900000	2094200000	0	0	0	0	0	0	0	0	0	0	601680000	838260000	516410000	0	0	0	0	0	0	0	0	0	0	1131900000	729420000	840470000	0	0	0	0	0	0	0	1876800	0	4534200	754030000	964080000	609030000	0.00248903
Importin-8	IPO8		0	0	0	0	338360000	2492900000	2094200000	0	0	0	0	0	0	0	0	0	0	601680000	838260000	516410000	0	0	0	0	0	0	0	0	0	0	1131900000	729420000	840470000	0	0	0	0	0	0	4521300	1968800	0	0	754030000	964080000	609030000	0.00261104
ATP-dependent RNA helicase DDX3X	DDX3X		4487900	0	0	0	338360000	2492900000	2094200000	0	0	0	∞	0	0	36066000	30346000	7516500	3900300	601680000	838260000	516410000	0.0504354	0.00896679	0.00755272	1.18849	1.18723	0.177787	20019000	4195000	0	0	1131900000	729420000	840470000	0.00370616	0	0	4.77211	0	0	0	3517100	0	0	754030000	964080000	609030000	0.0046644
60S ribosomal protein L7a	RPL7A		8363500	1570600	9357100	18556000	338360000	2492900000	2094200000	0.0046418	0.0037535	0.00886066	5.32504	0.423614	0.80863	131350000	185210000	0	0	601680000	838260000	516410000	0.307821	0	0	0.709195	0	0	82363000	40792000	0	0	1131900000	729420000	840470000	0.0360385	0	0	2.0191	0	0	0	3574400	0	0	754030000	964080000	609030000	0.00474039
Protein arginine N-methyltransferase 1	PRMT1		0	0	0	0	338360000	2492900000	2094200000	0	0	0	0	0	0	0	0	0	0	601680000	838260000	516410000	0	0	0	0	0	0	14261000	0	0	0	1131900000	729420000	840470000	0	0	0	∞	0	0	4583200	4105600	3869600	0	754030000	964080000	609030000	0.00544488
TOM1-like protein 2	TOM1L2		13079000	0	0	0	338360000	2492900000	2094200000	0	0	0	∞	0	0	275400000	217760000	0	0	601680000	838260000	516410000	0.36192	0	0	1.2647	0	0	61639000	16967000	7343000	0	1131900000	729420000	840470000	0.0149898	0.0100669	0	3.63288	∞	0.671582	0	4243700	0	5439500	754030000	964080000	609030000	0.00562803
60S ribosomal protein L14	RPL14		0	0	0	8731400	338360000	2492900000	2094200000	0	0	0.00416932	0	0	0	77277000	114850000	18565000	16044000	601680000	838260000	516410000	0.190882	0.0221471	0.0310683	0.672852	0.71285	0.116025	59255000	33939000	13958000	7870000	1131900000	729420000	840470000	0.0299841	0.0191358	0.00936381	1.74593	2.04359	0.638197	0	6696000	0	8296000	754030000	964080000	609030000	0.00888028
Protein S100-A10	S100A10		37835000	0	0	0	338360000	2492900000	2094200000	0	0	0	∞	0	0	47777000	58296000	0	0	601680000	838260000	516410000	0.0968887	0	0	0.819559	0	0	23197000	0	0	0	1131900000	729420000	840470000	0	0	0	∞	0	0	0	9788700	0	0	754030000	964080000	609030000	0.0129818
60S ribosomal protein L3	RPL3		0	1409000	10597000	0	338360000	2492900000	2094200000	0.0041642	0.00425087	0	0	∞	1.02081	70750000	95333000	6338700	5948600	601680000	838260000	516410000	0.158445	0.00756174	0.0115191	0.742135	0.65645	0.0477248	40816000	21611000	0	0	1131900000	729420000	840470000	0.0190927	0	0	1.88867	0	0	5920200	10293000	0	0	754030000	964080000	609030000	0.0136507
Erlin-2;Erlin-1	ERLIN2;ERLIN1		0	0	0	0	338360000	2492900000	2094200000	0	0	0	0	0	0	0	0	0	0	601680000	838260000	516410000	0	0	0	0	0	0	6299400	0	0	0	1131900000	729420000	840470000	0	0	0	∞	0	0	4744200	12931000	1891200	11120000	754030000	964080000	609030000	0.0171492
Fructose-bisphosphate aldolase A	ALDOA		0	2939400	12850000	0	338360000	2492900000	2094200000	0.0086872	0.00515464	0	0	∞	0.59336	8510700	8497400	0	0	601680000	838260000	516410000	0.0141228	0	0	1.00157	0	0	10575000	0	0	0	1131900000	729420000	840470000	0	0	0	∞	0	0	0	0	0	0	754030000	964080000	609030000	0
Polypyrimidine tract-binding protein 1	PTBP1		0	0	0	0	338360000	2492900000	2094200000	0	0	0	0	0	0	0	0	0	0	601680000	838260000	516410000	0	0	0	0	0	0	0	0	0	0	1131900000	729420000	840470000	0	0	0	0	0	0	0	0	0	0	754030000	964080000	609030000	0
Filamin-A	FLNA		0	13770000	1924400	6663100	338360000	2492900000	2094200000	0.0406963	0.000771952	0.00318169	0	0.242623	0.0189686	65079000	785030000	0	743260	601680000	838260000	516410000	1.30473	0	0.00143928	0.0829	0	0	24261000	12139000	0	0	1131900000	729420000	840470000	0.0107244	0	0	1.9986	0	0	0	0	0	3766300	754030000	964080000	609030000	0
Mitochondrial 2-oxoglutarate/malate carrier protein	SLC25A11		10404000	0	10653000	0	338360000	2492900000	2094200000	0	0.00427334	0	∞	∞	∞	11871000	0	0	5734300	601680000	838260000	516410000	0	0	0.0111042	∞	0	0	9806500	0	0	0	1131900000	729420000	840470000	0	0	0	∞	0	0	0	3939600	5621800	0	754030000	964080000	609030000	0.00522473
Rab GDP dissociation inhibitor beta	GDI2		0	0	0	0	338360000	2492900000	2094200000	0	0	0	0	0	0	0	0	0	0	601680000	838260000	516410000	0	0	0	0	0	0	0	6560300	0	0	1131900000	729420000	840470000	0.00579583	0	0	0	0	0	0	0	6924000	4518600	754030000	964080000	609030000	0
26S proteasome non-ATPase regulatory subunit 6	PSMD6		13068000	0	0	0	338360000	2492900000	2094200000	0	0	0	∞	0	0	11238000	5907300	0	0	601680000	838260000	516410000	0.00981801	0	0	1.90239	0	0	0	0	0	0	1131900000	729420000	840470000	0	0	0	0	0	0	0	9315700	0	0	754030000	964080000	609030000	0.0123545
Sequestosome-1	SQSTM1		0	0	0	18782000	338360000	2492900000	2094200000	0	0	0.00896858	0	0	0	287350000	235900000	46535000	18885000	601680000	838260000	516410000	0.392069	0.0555138	0.0365698	1.2181	1.51802	0.141592	127940000	59458000	20372000	4983800	1131900000	729420000	840470000	0.0525294	0.027929	0.00592978	2.15177	4.70996	0.531684	0	0	5618700	6503700	754030000	964080000	609030000	0
V-type proton ATPase 16 kDa proteolipid subunit	ATP6V0C		35834000	0	0	0	338360000	2492900000	2094200000	0	0	0	∞	0	0	96644000	94352000	0	12072000	601680000	838260000	516410000	0.156814	0	0.0233768	1.02429	0	0	18359000	0	0	0	1131900000	729420000	840470000	0	0	0	∞	0	0	0	0	8419600	8357100	754030000	964080000	609030000	0
Complement component 1 Q subcomponent-binding protein, mitochondrial	C1QBP		0	0	0	0	338360000	2492900000	2094200000	0	0	0	0	0	0	11570000	7622600	0	0	601680000	838260000	516410000	0.0126689	0	0	1.51785	0	0	0	0	0	0	1131900000	729420000	840470000	0	0	0	0	0	0	3583900	7882400	17208000	29810000	754030000	964080000	609030000	0.0104537
40S ribosomal protein S7	RPS7		6546100	0	0	0	338360000	2492900000	2094200000	0	0	0	∞	0	0	2548700	0	6263100	0	601680000	838260000	516410000	0	0.00747155	0	∞	∞	∞	7330400	4747300	5026600	0	1131900000	729420000	840470000	0.0041941	0.00689123	0	1.54412	∞	1.64308	0	24599000	5992000	3535200	754030000	964080000	609030000	0.0326234
Annexin A1	ANXA1		0	0	0	0	338360000	2492900000	2094200000	0	0	0	0	0	0	0	0	0	0	601680000	838260000	516410000	0	0	0	0	0	0	13237000	0	0	0	1131900000	729420000	840470000	0	0	0	∞	0	0	0	0	0	0	754030000	964080000	609030000	0
Eukaryotic initiation factor 4A-I;Eukaryotic initiation factor 4A-II	EIF4A1;EIF4A2		0	0	0	0	338360000	2492900000	2094200000	0	0	0	0	0	0	0	14163000	0	0	601680000	838260000	516410000	0.0235391	0	0	0	0	0	50570000	20465000	0	0	1131900000	729420000	840470000	0.0180802	0	0	2.47105	0	0	0	0	1806400	1207400	754030000	964080000	609030000	0
Ankycorbin	RAI14		128150000	17821000	0	0	338360000	2492900000	2094200000	0.0526688	0	0	7.19095	0	0	1510600000	1568100000	0	0	601680000	838260000	516410000	2.6062	0	0	0.963331	0	0	532450000	94967000	0	0	1131900000	729420000	840470000	0.0839005	0	0	5.60668	0	0	0	2422300	2618300	0	754030000	964080000	609030000	0.00321247
Elongation factor 1-gamma	EEF1G		0	0	0	10749000	338360000	2492900000	2094200000	0	0	0.00513275	0	0	0	32330000	14721000	0	0	601680000	838260000	516410000	0.0244665	0	0	2.19618	0	0	22162000	6223000	0	0	1131900000	729420000	840470000	0.00549784	0	0	3.5613	0	0	7124000	0	3195800	22926000	754030000	964080000	609030000	0
Alpha-actinin-1	ACTN1		7212800	0	4734500	11498000	338360000	2492900000	2094200000	0	0.00189919	0.0054904	∞	0.345912	∞	341180000	286700000	0	0	601680000	838260000	516410000	0.476499	0	0	1.19002	0	0	76811000	36095000	0	0	1131900000	729420000	840470000	0.0318889	0	0	2.12802	0	0	1952700	0	2771000	0	754030000	964080000	609030000	0
Protein disulfide-isomerase	P4HB		5375100	17010000	39423000	9245700	338360000	2492900000	2094200000	0.0502719	0.0158141	0.00441491	0.315996	3.58198	0.314572	110540000	99358000	18564000	27667000	601680000	838260000	516410000	0.165134	0.0221459	0.0535756	1.11254	0.413357	0.134108	105140000	19900000	7479900	0	1131900000	729420000	840470000	0.0175811	0.0102546	0	5.28342	∞	0.583275	3686400	6250300	0	10158000	754030000	964080000	609030000	0.00828919
Engulfment and cell motility protein 2;Engulfment and cell motility protein 1	ELMO2;ELMO1		0	0	0	0	338360000	2492900000	2094200000	0	0	0	0	0	0	0	0	0	0	601680000	838260000	516410000	0	0	0	0	0	0	0	0	0	0	1131900000	729420000	840470000	0	0	0	0	0	0	6144500	0	5864000	0	754030000	964080000	609030000	0
Tryptophan--tRNA ligase, cytoplasmic;T1-TrpRS;T2-TrpRS	WARS		0	0	0	0	338360000	2492900000	2094200000	0	0	0	0	0	0	20274000	21237000	0	0	601680000	838260000	516410000	0.0352962	0	0	0.954655	0	0	0	0	0	0	1131900000	729420000	840470000	0	0	0	0	0	0	15302000	5097600	8040500	0	754030000	964080000	609030000	0.00676047
Phosphate carrier protein, mitochondrial	SLC25A3		32068000	0	32426000	0	338360000	2492900000	2094200000	0	0.0130073	0	∞	∞	∞	43508000	27383000	11757000	0	601680000	838260000	516410000	0.0455109	0.0140255	0	1.58887	∞	0.308178	25615000	10091000	0	0	1131900000	729420000	840470000	0.0089151	0	0	2.5384	0	0	1370200	10219000	0	19638000	754030000	964080000	609030000	0.0135525
Sterol O-acyltransferase 1	SOAT1		0	0	0	0	338360000	2492900000	2094200000	0	0	0	0	0	0	0	0	0	0	601680000	838260000	516410000	0	0	0	0	0	0	0	0	0	0	1131900000	729420000	840470000	0	0	0	0	0	0	0	0	0	0	754030000	964080000	609030000	0
Guanine nucleotide-binding protein G(i) subunit alpha-2	GNAI2		101580000	35770000	218010000	148580000	338360000	2492900000	2094200000	0.105716	0.0874524	0.0709483	2.83981	1.23262	0.82724	1153900000	715630000	37669000	0	601680000	838260000	516410000	1.18939	0.0449371	0	1.61243	∞	0.0377818	556520000	31369000	9046800	0	1131900000	729420000	840470000	0.0277136	0.0124027	0	17.7411	∞	0.447533	7822100	0	0	0	754030000	964080000	609030000	0
Endoplasmin	HSP90B1		0	749160	1802500	3500200	338360000	2492900000	2094200000	0.00221409	0.000723053	0.00167138	0	0.432609	0.326569	0	7458700	0	0	601680000	838260000	516410000	0.0123965	0	0	0	0	0	35710000	25149000	0	0	1131900000	729420000	840470000	0.0222184	0	0	1.41994	0	0	0	0	0	0	754030000	964080000	609030000	0
Tyrosine-protein kinase Yes;Tyrosine-protein kinase Lyn;Tyrosine-protein kinase HCK;Proto-oncogene tyrosine-protein kinase Src;Tyrosine-protein kinase Fyn	YES1;LYN;HCK;SRC;FYN		0	0	0	0	338360000	2492900000	2094200000	0	0	0	0	0	0	8479200	10278000	0	0	601680000	838260000	516410000	0.0170822	0	0	0.824985	0	0	0	0	0	0	1131900000	729420000	840470000	0	0	0	0	0	0	0	0	16009000	20101000	754030000	964080000	609030000	0
F-actin-capping protein subunit alpha-1	CAPZA1		46629000	0	0	0	338360000	2492900000	2094200000	0	0	0	∞	0	0	183360000	181280000	0	0	601680000	838260000	516410000	0.30129	0	0	1.01147	0	0	84513000	15767000	0	4153000	1131900000	729420000	840470000	0.0139297	0	0.00494128	5.36012	0	0	7467300	7767800	10377000	0	754030000	964080000	609030000	0.0103017
U4/U6 small nuclear ribonucleoprotein Prp31	PRPF31		0	0	0	0	338360000	2492900000	2094200000	0	0	0	0	0	0	0	13183000	0	0	601680000	838260000	516410000	0.0219103	0	0	0	0	0	0	0	0	0	1131900000	729420000	840470000	0	0	0	0	0	0	0	0	0	39525000	754030000	964080000	609030000	0
60S acidic ribosomal protein P0;60S acidic ribosomal protein P0-like	RPLP0;RPLP0P6		98063000	421030	19776000	57495000	338360000	2492900000	2094200000	0.00124433	0.00793293	0.0274544	232.912	0.288949	6.37528	382430000	462000000	7915400	8883700	601680000	838260000	516410000	0.76785	0.00944266	0.0172028	0.827771	0.548902	0.0122975	217910000	146240000	15866000	7833500	1131900000	729420000	840470000	0.129199	0.0217515	0.00932038	1.49008	2.33376	0.168357	16063000	33553000	24811000	13925000	754030000	964080000	609030000	0.0444982
Plasminogen activator inhibitor 1 RNA-binding protein	SERBP1		0	0	0	1276800	338360000	2492900000	2094200000	0	0	0.000609684	0	0	0	1565700	925250	730050	0	601680000	838260000	516410000	0.00153778	0.000870911	0	1.69219	∞	0.566344	16443000	1659400	3232900	2232200	1131900000	729420000	840470000	0.00146603	0.00443215	0.00265589	9.909	1.6688	3.02323	0	0	0	1661700	754030000	964080000	609030000	0
14-3-3 protein epsilon	YWHAE		0	0	0	0	338360000	2492900000	2094200000	0	0	0	0	0	0	0	0	0	0	601680000	838260000	516410000	0	0	0	0	0	0	0	0	0	0	1131900000	729420000	840470000	0	0	0	0	0	0	0	0	0	0	754030000	964080000	609030000	0
Transcription initiation factor TFIID subunit 4	TAF4		0	0	0	0	338360000	2492900000	2094200000	0	0	0	0	0	0	0	0	0	0	601680000	838260000	516410000	0	0	0	0	0	0	0	0	0	0	1131900000	729420000	840470000	0	0	0	0	0	0	5565200	0	1778000	4217000	754030000	964080000	609030000	0
Vesicle-associated membrane protein-associated protein A;Vesicle-associated membrane protein-associated protein B/C	VAPA;VAPB		0	0	0	0	338360000	2492900000	2094200000	0	0	0	0	0	0	0	0	0	0	601680000	838260000	516410000	0	0	0	0	0	0	0	0	0	0	1131900000	729420000	840470000	0	0	0	0	0	0	0	1811300	972170	1343200	754030000	964080000	609030000	0.00240216
Probable ATP-dependent RNA helicase DDX20	DDX20		0	0	0	0	338360000	2492900000	2094200000	0	0	0	0	0	0	14721000	26005000	0	0	601680000	838260000	516410000	0.0432206	0	0	0.566083	0	0	0	0	0	0	1131900000	729420000	840470000	0	0	0	0	0	0	9131700	1818200	9616700	1592900	754030000	964080000	609030000	0.00241131
Glyceraldehyde-3-phosphate dehydrogenase	GAPDH		0	2738300	23622000	38842000	338360000	2492900000	2094200000	0.00809286	0.00947571	0.0185474	0	0.510891	1.17087	69390000	67337000	0	14770000	601680000	838260000	516410000	0.111915	0	0.0286013	1.03049	0	0	285780000	85061000	18346000	0	1131900000	729420000	840470000	0.0751489	0.0251515	0	3.35971	∞	0.334689	14047000	4740800	21969000	22817000	754030000	964080000	609030000	0.00628728
Complement C4-B;Complement C4 beta chain;Complement C4-B alpha chain;C4a anaphylatoxin;C4b-B;C4d-B;Complement C4 gamma chain;Complement C4-A;Complement C4 beta chain;Complement C4-A alpha chain;C4a anaphylatoxin;C4b-A;C4d-A;Complement C4 gamma chain	C4B;C4A		0	0	0	0	338360000	2492900000	2094200000	0	0	0	0	0	0	0	0	0	0	601680000	838260000	516410000	0	0	0	0	0	0	0	0	0	0	1131900000	729420000	840470000	0	0	0	0	0	0	3798500	0	3203400	0	754030000	964080000	609030000	0
60S ribosomal protein L8	RPL8		0	3387400	17967000	1418100	338360000	2492900000	2094200000	0.0100112	0.00720727	0.000677156	0	10.6434	0.719918	147470000	37796000	24729000	35159000	601680000	838260000	516410000	0.0628174	0.0295004	0.0680835	3.90174	0.433297	0.469621	136800000	0	0	0	1131900000	729420000	840470000	0	0	0	∞	0	0	4189900	15372000	7068900	9765500	754030000	964080000	609030000	0.0203865
Serine/threonine-protein kinase RIO1	RIOK1		0	0	0	0	338360000	2492900000	2094200000	0	0	0	0	0	0	0	0	0	0	601680000	838260000	516410000	0	0	0	0	0	0	0	8018100	0	0	1131900000	729420000	840470000	0.00708375	0	0	0	0	0	0	0	0	0	754030000	964080000	609030000	0
SCY1-like protein 2	SCYL2		87153000	5587300	214510000	132930000	338360000	2492900000	2094200000	0.0165129	0.0860484	0.0634753	15.5984	1.35562	5.21098	231650000	88475000	205770000	48037000	601680000	838260000	516410000	0.147047	0.245473	0.093021	2.61825	2.63889	1.66935	282940000	126050000	162180000	102200000	1131900000	729420000	840470000	0.111361	0.222341	0.121599	2.24466	1.82848	1.99657	0	0	0	0	754030000	964080000	609030000	0
Transmembrane protein 43	TMEM43		0	0	0	0	338360000	2492900000	2094200000	0	0	0	0	0	0	0	0	0	0	601680000	838260000	516410000	0	0	0	0	0	0	0	0	0	0	1131900000	729420000	840470000	0	0	0	0	0	0	0	0	0	0	754030000	964080000	609030000	0
ATP synthase subunit alpha, mitochondrial	ATP5A1		0	6519100	13901000	51858000	338360000	2492900000	2094200000	0.0192668	0.00557624	0.0247627	0	0.225187	0.289423	53544000	0	0	1692900	601680000	838260000	516410000	0	0	0.00327821	∞	0	0	80459000	50464000	40039000	34541000	1131900000	729420000	840470000	0.0445834	0.0548916	0.0410972	1.59438	1.33565	1.23121	0	0	0	2116000	754030000	964080000	609030000	0
Drebrin	DBN1		54312000	0	37863000	56612000	338360000	2492900000	2094200000	0	0.0151883	0.0270328	∞	0.561849	∞	890430000	649590000	0	0	601680000	838260000	516410000	1.07963	0	0	1.37076	0	0	405530000	46460000	0	0	1131900000	729420000	840470000	0.041046	0	0	8.72858	0	0	15813000	0	6578700	0	754030000	964080000	609030000	0
60S ribosomal protein L19	RPL19		0	0	0	12933000	338360000	2492900000	2094200000	0	0	0.00617563	0	0	0	73902000	72575000	0	0	601680000	838260000	516410000	0.120621	0	0	1.01828	0	0	39736000	0	0	0	1131900000	729420000	840470000	0	0	0	∞	0	0	3927100	588910	0	0	754030000	964080000	609030000	0.000781017
E3 ubiquitin-protein ligase TRIM21	TRIM21		629000000	45070000	596220000	589920000	338360000	2492900000	2094200000	0.133201	0.239167	0.281692	13.9561	0.849037	1.79553	806850000	504160000	283170000	280120000	601680000	838260000	516410000	0.83792	0.337807	0.542437	1.60038	0.622758	0.403149	773330000	438640000	238990000	240920000	1131900000	729420000	840470000	0.387525	0.327644	0.286649	1.76302	1.14301	0.845477	3133400	0	5656700	5514600	754030000	964080000	609030000	0
Probable ATP-dependent RNA helicase DDX60-like	DDX60L		0	0	0	0	338360000	2492900000	2094200000	0	0	0	0	0	0	0	0	0	0	601680000	838260000	516410000	0	0	0	0	0	0	20919000	0	20586000	0	1131900000	729420000	840470000	0	0.0282224	0	∞	∞	∞	0	0	0	0	754030000	964080000	609030000	0
S-adenosylmethionine synthase isoform type-2	MAT2A		0	0	13576000	18696000	338360000	2492900000	2094200000	0	0.00544587	0.00892751	0	0.610009	∞	11164000	0	0	0	601680000	838260000	516410000	0	0	0	∞	0	0	7476400	0	8383600	7255400	1131900000	729420000	840470000	0	0.0114935	0.00863255	∞	1.33142	∞	2994100	0	0	0	754030000	964080000	609030000	0
26S protease regulatory subunit 8	PSMC5		0	417030	0	0	338360000	2492900000	2094200000	0.0012325	0	0	0	0	0	0	0	0	0	601680000	838260000	516410000	0	0	0	0	0	0	0	0	0	0	1131900000	729420000	840470000	0	0	0	0	0	0	16331000	11255000	6737500	9148700	754030000	964080000	609030000	0.0149265
40S ribosomal protein S27-like;40S ribosomal protein S27	RPS27L;RPS27		0	0	0	17597000	338360000	2492900000	2094200000	0	0	0.00840273	0	0	0	0	17699000	0	0	601680000	838260000	516410000	0.029416	0	0	0	0	0	12314000	12171000	25411000	14843000	1131900000	729420000	840470000	0.0107527	0.0348373	0.0176604	1.01175	1.97263	3.23986	0	0	0	0	754030000	964080000	609030000	0
Lamina-associated polypeptide 2, isoform alpha;Thymopoietin;Thymopentin	TMPO		12858000	2827800	28177000	72802000	338360000	2492900000	2094200000	0.00835737	0.0113029	0.0347636	4.547	0.325136	1.35245	51741000	18232000	15392000	0	601680000	838260000	516410000	0.0303018	0.0183618	0	2.83792	∞	0.605965	48363000	0	36853000	26571000	1131900000	729420000	840470000	0	0.0505237	0.0316145	∞	1.59812	∞	25451000	1945900	1512900	11116000	754030000	964080000	609030000	0.00258067
Polyadenylate-binding protein 1	PABPC1		0	0	0	16845000	338360000	2492900000	2094200000	0	0	0.00804364	0	0	0	67192000	47017000	0	0	601680000	838260000	516410000	0.0781429	0	0	1.4291	0	0	19042000	0	0	0	1131900000	729420000	840470000	0	0	0	∞	0	0	0	0	0	0	754030000	964080000	609030000	0
Elongation factor 1-beta	EEF1B2		0	0	0	0	338360000	2492900000	2094200000	0	0	0	0	0	0	20535000	0	0	0	601680000	838260000	516410000	0	0	0	∞	0	0	0	0	0	0	1131900000	729420000	840470000	0	0	0	0	0	0	5584500	7681900	10215000	8407700	754030000	964080000	609030000	0.0101878
60S ribosomal protein L29	RPL29		0	0	0	0	338360000	2492900000	2094200000	0	0	0	0	0	0	29475000	76537000	0	9013400	601680000	838260000	516410000	0.127205	0	0.017454	0.385108	0	0	27040000	0	0	19447000	1131900000	729420000	840470000	0	0	0.0231382	∞	0	0	0	36045000	24598000	39937000	754030000	964080000	609030000	0.0478031
RNA-binding protein 10	RBM10		0	2593000	0	22934000	338360000	2492900000	2094200000	0.00766344	0	0.0109512	0	0	0	0	0	0	0	601680000	838260000	516410000	0	0	0	0	0	0	9166600	2266000	1767400	0	1131900000	729420000	840470000	0.00200194	0.00242302	0	4.04528	∞	1.21033	78146000	25927000	3836800	0	754030000	964080000	609030000	0.0343846
60S acidic ribosomal protein P1	RPLP1		23921000	22206000	0	0	338360000	2492900000	2094200000	0.0656283	0	0	1.07723	0	0	113100000	139190000	5904700	0	601680000	838260000	516410000	0.231336	0.007044	0	0.812558	∞	0.0304493	25298000	18457000	0	0	1131900000	729420000	840470000	0.0163062	0	0	1.37065	0	0	0	24931000	20108000	10095000	754030000	964080000	609030000	0.0330637
ADP/ATP translocase 2;ADP/ATP translocase 2, N-terminally processed;ADP/ATP translocase 1	SLC25A5;SLC25A4		99764000	7171300	12401000	48388000	338360000	2492900000	2094200000	0.0211943	0.00497453	0.0231057	13.9116	0.215294	0.234711	111920000	63894000	88745000	27877000	601680000	838260000	516410000	0.106193	0.105868	0.0539823	1.75165	1.96116	0.996944	92916000	15755000	8780300	0	1131900000	729420000	840470000	0.0139191	0.0120374	0	5.89756	∞	0.864811	0	10457000	20731000	17639000	754030000	964080000	609030000	0.0138681
26S proteasome non-ATPase regulatory subunit 11	PSMD11		0	0	0	0	338360000	2492900000	2094200000	0	0	0	0	0	0	0	0	0	0	601680000	838260000	516410000	0	0	0	0	0	0	4165500	0	0	0	1131900000	729420000	840470000	0	0	0	∞	0	0	16321000	14428000	3473000	0	754030000	964080000	609030000	0.0191345
60S ribosomal protein L12	RPL12		28499000	2758800	0	13874000	338360000	2492900000	2094200000	0.00815345	0	0.00662496	10.3302	0	0	125960000	219110000	0	0	601680000	838260000	516410000	0.364164	0	0	0.574871	0	0	58081000	0	0	5442800	1131900000	729420000	840470000	0	0	0.0064759	∞	0	0	0	13319000	16838000	14834000	754030000	964080000	609030000	0.0176638
Caveolin-2	CAV2		0	0	27659000	26638000	338360000	2492900000	2094200000	0	0.0110951	0.0127199	0	0.872264	∞	0	0	0	0	601680000	838260000	516410000	0	0	0	0	0	0	0	0	0	0	1131900000	729420000	840470000	0	0	0	0	0	0	7138800	19522000	15230000	22082000	754030000	964080000	609030000	0.0258902
Filamin-B	FLNB		799190	1328600	0	0	338360000	2492900000	2094200000	0.00392659	0	0	0.601528	0	0	238370000	1039100000	40118000	40349000	601680000	838260000	516410000	1.727	0.0478587	0.0781337	0.2294	0.612523	0.0277121	58175000	41242000	27888000	15501000	1131900000	729420000	840470000	0.0364361	0.0382331	0.0184433	1.41058	2.07301	1.04932	0	47038000	25743000	5801100	754030000	964080000	609030000	0.0623821
Carbonyl reductase [NADPH] 1;Carbonyl reductase [NADPH] 3	CBR1;CBR3		0	0	0	0	338360000	2492900000	2094200000	0	0	0	0	0	0	0	0	0	0	601680000	838260000	516410000	0	0	0	0	0	0	0	0	0	0	1131900000	729420000	840470000	0	0	0	0	0	0	13802000	6858800	7754100	0	754030000	964080000	609030000	0.00909619
Alpha-enolase	ENO1		0	7250300	45136000	19114000	338360000	2492900000	2094200000	0.0214278	0.0181058	0.00912711	0	1.98374	0.84497	66820000	28420000	47255000	1699100	601680000	838260000	516410000	0.0472344	0.0563727	0.00329022	2.35116	17.1334	1.19347	137450000	9295000	4158600	26884000	1131900000	729420000	840470000	0.00821186	0.00570124	0.0319869	14.7875	0.178237	0.69427	13346000	16584000	36818000	41532000	754030000	964080000	609030000	0.0219938
Fibrinogen gamma chain	FGG		184060000	17619000	105270000	96036000	338360000	2492900000	2094200000	0.0520718	0.0422279	0.0458581	10.4467	0.920839	0.810956	28423000	0	28679000	11934000	601680000	838260000	516410000	0	0.0342125	0.0231095	∞	1.48045	∞	72753000	0	14463000	57314000	1131900000	729420000	840470000	0	0.0198281	0.0681928	∞	0.290765	∞	25681000	0	0	19226000	754030000	964080000	609030000	0
14-3-3 protein theta	YWHAQ		20679000	1410700	12698000	12731000	338360000	2492900000	2094200000	0.00416923	0.00509367	0.00607917	14.6587	0.837888	1.22173	166740000	77273000	0	10699000	601680000	838260000	516410000	0.128429	0	0.020718	2.1578	0	0	51150000	5737000	0	0	1131900000	729420000	840470000	0.00506847	0	0	8.91581	0	0	1895200	0	19430000	5791300	754030000	964080000	609030000	0
26S proteasome non-ATPase regulatory subunit 4	PSMD4		49251000	382630	51099000	44762000	338360000	2492900000	2094200000	0.00113084	0.0204978	0.0213743	128.717	0.958995	18.1262	50018000	20681000	106370	3518300	601680000	838260000	516410000	0.0343721	0.000126894	0.006813	2.41855	0.0186253	0.00369177	109260000	67026000	88308000	69418000	1131900000	729420000	840470000	0.0592155	0.121066	0.0825943	1.63011	1.46579	2.0445	19621000	1509800	59207000	2141200	754030000	964080000	609030000	0.00200231
Glutathione S-transferase P	GSTP1		17612000	0	0	0	338360000	2492900000	2094200000	0	0	0	∞	0	0	29586000	25013000	0	0	601680000	838260000	516410000	0.0415719	0	0	1.18282	0	0	19043000	0	0	0	1131900000	729420000	840470000	0	0	0	∞	0	0	0	11186000	15555000	15816000	754030000	964080000	609030000	0.014835
60S acidic ribosomal protein P2	RPLP2		0	6939200	35285000	40043000	338360000	2492900000	2094200000	0.0205083	0.0141542	0.0191209	0	0.740247	0.690168	96365000	211230000	0	0	601680000	838260000	516410000	0.351067	0	0	0.456209	0	0	30807000	58218000	7267600	0	1131900000	729420000	840470000	0.0514339	0.00996353	0	0.529166	∞	0.193715	0	9338700	8107900	0	754030000	964080000	609030000	0.0123851
Cofilin-1	CFL1		11508000	3524500	14387000	30639000	338360000	2492900000	2094200000	0.0104164	0.00577119	0.0146304	3.26514	0.394465	0.554047	15329000	47002000	0	0	601680000	838260000	516410000	0.0781179	0	0	0.326135	0	0	34027000	0	9255200	7250200	1131900000	729420000	840470000	0	0.0126884	0.00862636	∞	1.47089	∞	0	0	10084000	9397400	754030000	964080000	609030000	0
Histone-binding protein RBBP7;Histone-binding protein RBBP4	RBBP7;RBBP4		33811000	176360	69269000	50955000	338360000	2492900000	2094200000	0.00052122	0.0277865	0.0243315	191.716	1.142	53.3105	54851000	51350000	57221000	18239000	601680000	838260000	516410000	0.0853444	0.0682616	0.0353188	1.06818	1.93273	0.799838	24402000	16643000	11261000	8592500	1131900000	729420000	840470000	0.0147036	0.0154383	0.0102234	1.4662	1.51009	1.04997	0	37837000	51919000	27973000	754030000	964080000	609030000	0.0501797
Carboxymethylenebutenolidase homolog	CMBL		0	0	0	0	338360000	2492900000	2094200000	0	0	0	0	0	0	0	0	0	0	601680000	838260000	516410000	0	0	0	0	0	0	0	0	0	0	1131900000	729420000	840470000	0	0	0	0	0	0	20003000	10384000	3882000	1054000	754030000	964080000	609030000	0.0137713
Ras GTPase-activating protein-binding protein 1	G3BP1		0	530070	0	5583900	338360000	2492900000	2094200000	0.00156659	0	0.00266636	0	0	0	0	0	0	0	601680000	838260000	516410000	0	0	0	0	0	0	9518800	0	6759300	0	1131900000	729420000	840470000	0	0.00926668	0	∞	∞	∞	16484000	17260000	18323000	0	754030000	964080000	609030000	0.0228903
Protein-glutamine gamma-glutamyltransferase 2	TGM2		6096000	3258500	33802000	14609000	338360000	2492900000	2094200000	0.00963028	0.0135593	0.00697593	1.8708	1.94373	1.40799	29176000	0	6259100	0	601680000	838260000	516410000	0	0.00746678	0	∞	∞	∞	43615000	0	12460000	0	1131900000	729420000	840470000	0	0.0170821	0	∞	∞	∞	37010000	11101000	34386000	26883000	754030000	964080000	609030000	0.0147222
Heat shock protein HSP 90-alpha	HSP90AA1		30289000	6150200	62456000	44718000	338360000	2492900000	2094200000	0.0181765	0.0250536	0.0213533	4.92488	1.17329	1.37835	104830000	151860000	36777000	17887000	601680000	838260000	516410000	0.252393	0.043873	0.0346372	0.690307	1.26664	0.173828	266250000	58910000	0	17612000	1131900000	729420000	840470000	0.0520452	0	0.0209549	4.51961	0	0	44905000	28809000	57527000	26697000	754030000	964080000	609030000	0.0382067
Programmed cell death protein 6	PDCD6		0	2077300	8413800	12412000	338360000	2492900000	2094200000	0.00613932	0.00337511	0.00592685	0	0.569461	0.549752	50978000	27563000	0	0	601680000	838260000	516410000	0.0458101	0	0	1.84951	0	0	21821000	21646000	14532000	9256600	1131900000	729420000	840470000	0.0191236	0.0199227	0.0110136	1.00808	1.80892	1.04179	0	10115000	0	0	754030000	964080000	609030000	0.0134146
Spindlin-1	SPIN1		0	1930800	20347000	17856000	338360000	2492900000	2094200000	0.00570635	0.00816198	0.00852641	0	0.957259	1.43033	12431000	7075600	0	3725900	601680000	838260000	516410000	0.0117597	0	0.007215	1.75688	0	0	40451000	0	0	6026900	1131900000	729420000	840470000	0	0	0.00717087	∞	0	0	45534000	17159000	12148000	15390000	754030000	964080000	609030000	0.0227564
Myosin light chain 1/3, skeletal muscle isoform;Myosin light chain 3	MYL1;MYL3		69495000	6871900	0	0	338360000	2492900000	2094200000	0.0203094	0	0	10.1129	0	0	767460000	491900000	0	31685000	601680000	838260000	516410000	0.817544	0	0.0613563	1.5602	0	0	534270000	0	0	0	1131900000	729420000	840470000	0	0	0	∞	0	0	0	68742000	89904000	26421000	754030000	964080000	609030000	0.0911661
Peptidyl-prolyl cis-trans isomerase A;Peptidyl-prolyl cis-trans isomerase A, N-terminally processed	PPIA		0	4984000	15577000	23646000	338360000	2492900000	2094200000	0.0147299	0.00624855	0.0112912	0	0.5534	0.424209	24725000	59034000	16522000	0	601680000	838260000	516410000	0.0981153	0.0197099	0	0.418826	∞	0.200885	89967000	59828000	0	0	1131900000	729420000	840470000	0.0528563	0	0	1.50376	0	0	0	17644000	29841000	44278000	754030000	964080000	609030000	0.0233996
Coordinator of PRMT5 and differentiation stimulator	COPRS		0	1887100	7783500	11569000	338360000	2492900000	2094200000	0.0055772	0.00312227	0.00552431	0	0.565187	0.559827	7897300	11901000	0	0	601680000	838260000	516410000	0.0197796	0	0	0.663583	0	0	27622000	29999000	10563000	6318400	1131900000	729420000	840470000	0.0265032	0.0144814	0.0075177	0.920764	1.9263	0.5464	4934800	10911000	0	0	754030000	964080000	609030000	0.0144702
Uncharacterized protein C11orf84	C11orf84		0	0	5007000	7365100	338360000	2492900000	2094200000	0	0.0020085	0.0035169	0	0.5711	∞	49561000	26759000	19981000	0	601680000	838260000	516410000	0.0444738	0.0238363	0	1.85212	∞	0.535962	18816000	14638000	38455000	6192500	1131900000	729420000	840470000	0.0129322	0.05272	0.0073679	1.28542	7.15536	4.07663	583170000	36367000	33204000	42549000	754030000	964080000	609030000	0.0482302
Clathrin heavy chain 1	CLTC		25931000	53433000	21075000	10623000	338360000	2492900000	2094200000	0.157918	0.00845401	0.00507258	0.485299	1.66661	0.0535343	4957100000	2515600000	10114000	4467900	601680000	838260000	516410000	4.18096	0.0120655	0.00865185	1.97054	1.39455	0.00288581	2077500000	123150000	0	6720400	1131900000	729420000	840470000	0.108799	0	0.007996	16.8697	0	0	4773400	16387000	5933400	15406000	754030000	964080000	609030000	0.0217326
Pyruvate kinase PKM	PKM		5219300	962790	40868000	33497000	338360000	2492900000	2094200000	0.00284546	0.0163938	0.0159951	5.42102	1.02492	5.76137	37603000	25714000	13253000	6401700	601680000	838260000	516410000	0.042737	0.0158101	0.0123965	1.46236	1.27537	0.36994	120950000	14603000	22670000	14409000	1131900000	729420000	840470000	0.0129013	0.0310795	0.017144	8.28254	1.81285	2.40902	20937000	21862000	22836000	35674000	754030000	964080000	609030000	0.0289935
Zinc finger and BTB domain-containing protein 14	ZBTB14		16140000	7561800	54251000	0	338360000	2492900000	2094200000	0.0223484	0.0217622	0	2.13441	∞	0.973771	0	0	0	0	601680000	838260000	516410000	0	0	0	0	0	0	0	0	0	20022000	1131900000	729420000	840470000	0	0	0.0238224	0	0	0	10867000	44338000	29916000	26152000	754030000	964080000	609030000	0.0588014
Ankyrin repeat and FYVE domain-containing protein 1	ANKFY1		0	0	0	0	338360000	2492900000	2094200000	0	0	0	0	0	0	0	82097000	0	0	601680000	838260000	516410000	0.136446	0	0	0	0	0	0	0	0	0	1131900000	729420000	840470000	0	0	0	0	0	0	22678000	40020000	52115000	7059500	754030000	964080000	609030000	0.0530748
Heat shock 70 kDa protein 6;Putative heat shock 70 kDa protein 7	HSPA6;HSPA7		173550000	4071800	265090000	0	338360000	2492900000	2094200000	0.0120339	0.106338	0	42.6224	∞	8.83652	116460000	78926000	58315000	81284000	601680000	838260000	516410000	0.131176	0.0695667	0.157402	1.47556	0.441968	0.530331	281890000	9689700	0	12686000	1131900000	729420000	840470000	0.00856056	0	0.0150939	29.0917	0	0	55052000	25558000	34190000	31626000	754030000	964080000	609030000	0.0338952
6-phosphofructo-2-kinase/fructose-2,6-bisphosphatase 2;6-phosphofructo-2-kinase;Fructose-2,6-bisphosphatase	PFKFB2		26881000	599380	39134000	72593000	338360000	2492900000	2094200000	0.00177143	0.0156982	0.0346638	44.848	0.452869	8.86189	12929000	29038000	23853000	10170000	601680000	838260000	516410000	0.0482615	0.0284554	0.0196937	0.445244	1.4449	0.589608	11116000	24402000	8163500	0	1131900000	729420000	840470000	0.0215584	0.0111918	0	0.455536	∞	0.519136	2986000	17012000	17337000	7668000	754030000	964080000	609030000	0.0225614
26S protease regulatory subunit 6B	PSMC4		0	0	13290000	19705000	338360000	2492900000	2094200000	0	0.00533114	0.00940932	0	0.566581	∞	26370000	5952500	4801900	0	601680000	838260000	516410000	0.00989313	0.00572841	0	4.43007	∞	0.579029	16929000	2684500	0	5680600	1131900000	729420000	840470000	0.00237168	0	0.00675884	6.3062	0	0	95969000	65092000	44139000	71055000	754030000	964080000	609030000	0.0863255
Heterogeneous nuclear ribonucleoprotein K	HNRNPK		48172000	2063200	33549000	13134000	338360000	2492900000	2094200000	0.00609765	0.0134578	0.00627161	23.3482	2.14583	2.20705	25404000	38528000	0	0	601680000	838260000	516410000	0.064034	0	0	0.659365	0	0	64207000	43980000	18552000	5164700	1131900000	729420000	840470000	0.038855	0.0254339	0.00614501	1.45991	4.13895	0.654585	139720000	71605000	46154000	80362000	754030000	964080000	609030000	0.0949631
Ubiquitin-60S ribosomal protein L40;Ubiquitin;60S ribosomal protein L40;Ubiquitin-40S ribosomal protein S27a;Ubiquitin;40S ribosomal protein S27a;Polyubiquitin-B;Ubiquitin;Polyubiquitin-C;Ubiquitin	UBA52;RPS27A;UBB;UBC		196290000	53200000	220700000	213230000	338360000	2492900000	2094200000	0.157229	0.0885314	0.101819	3.68966	0.869495	0.563073	1394400000	1473000000	108470000	25915000	601680000	838260000	516410000	2.44815	0.129399	0.050183	0.94664	2.57854	0.0528559	831960000	361230000	77295000	50000000	1131900000	729420000	840470000	0.319136	0.105968	0.0594905	2.30313	1.78125	0.332046	60092000	111310000	127110000	114250000	754030000	964080000	609030000	0.14762
60S ribosomal protein L38	RPL38		12522000	3970100	101440000	104250000	338360000	2492900000	2094200000	0.0117334	0.0406916	0.0497803	3.15408	0.817422	3.46802	84837000	68260000	74659000	0	601680000	838260000	516410000	0.113449	0.0890643	0	1.24285	∞	0.78506	40149000	15764000	10639000	91331000	1131900000	729420000	840470000	0.013927	0.0145856	0.108667	2.54688	0.134223	1.04728	4137600	14899000	19002000	0	754030000	964080000	609030000	0.0197592
Histone H2B type 1-L;Histone H2B type 1-M;Histone H2B type 1-N;Histone H2B type 1-H;Histone H2B type 3-B;Histone H2B type 2-F;Histone H2B type 2-E;Histone H2B type 1-C/E/F/G/I;Histone H2B type 1-D;Histone H2B type F-S;Histone H2B type 1-B;Histone H2B type 1-O;Histone H2B type 1-J;Histone H2B type 1-K;Histone H2B type 1-A	HIST1H2BL;HIST1H2BM;HIST1H2BN;HIST1H2BH;HIST3H2BB;HIST2H2BF;HIST2H2BE;HIST1H2BC;HIST1H2BD;H2BFS;HIST1H2BB;HIST1H2BO;HIST1H2BJ;HIST1H2BK;HIST1H2BA		76005000	7234100	32825000	47647000	338360000	2492900000	2094200000	0.0213799	0.0131674	0.0227519	10.5065	0.578739	0.615878	129370000	166930000	0	0	601680000	838260000	516410000	0.27744	0	0	0.774996	0	0	97862000	61284000	9745200	14860000	1131900000	729420000	840470000	0.0541426	0.0133602	0.0176806	1.59686	0.755643	0.24676	18210000	106080000	22495000	55007000	754030000	964080000	609030000	0.140684
Inosine-5-monophosphate dehydrogenase 2	IMPDH2		0	539360	19809000	24025000	338360000	2492900000	2094200000	0.00159404	0.00794617	0.0114722	0	0.692648	4.98492	20090000	26237000	0	0	601680000	838260000	516410000	0.0436062	0	0	0.765713	0	0	31549000	19007000	0	0	1131900000	729420000	840470000	0.0167921	0	0	1.65986	0	0	79115000	30930000	19048000	2232100	754030000	964080000	609030000	0.0410196
Elongation factor Tu, mitochondrial	TUFM		56339000	0	33207000	45202000	338360000	2492900000	2094200000	0	0.0133206	0.0215844	∞	0.617142	∞	43411000	52812000	0	6797600	601680000	838260000	516410000	0.0877742	0	0.0131632	0.821991	0	0	18086000	22860000	2370500	0	1131900000	729420000	840470000	0.0201961	0.00324984	0	0.791164	∞	0.160914	43185000	39123000	53905000	41275000	754030000	964080000	609030000	0.0518852
T-complex protein 1 subunit theta	CCT8		0	2074100	70264000	63898000	338360000	2492900000	2094200000	0.00612986	0.0281856	0.0305119	0	0.923759	4.59809	25916000	52837000	54288000	23484000	601680000	838260000	516410000	0.0878158	0.0647627	0.0454755	0.49049	1.42412	0.737484	135660000	87331000	10613000	43273000	1131900000	729420000	840470000	0.0771543	0.0145499	0.0514867	1.5534	0.282596	0.188582	1707500	43081000	74918000	83429000	754030000	964080000	609030000	0.0571343
Stress-70 protein, mitochondrial	HSPA9		52776000	4077100	103100000	72163000	338360000	2492900000	2094200000	0.0120496	0.0413575	0.0344585	12.9445	1.20021	3.43227	177960000	157870000	43114000	15945000	601680000	838260000	516410000	0.262382	0.0514327	0.0308766	1.12726	1.66575	0.196022	196640000	115010000	86443000	51291000	1131900000	729420000	840470000	0.101608	0.118509	0.0610266	1.70976	1.94193	1.16634	85065000	19116000	34228000	10006000	754030000	964080000	609030000	0.0253518
Actin-related protein 2/3 complex subunit 4	ARPC4		116730000	8107900	35275000	30008000	338360000	2492900000	2094200000	0.0239623	0.0141502	0.0143291	14.3971	0.987514	0.590518	0	0	0	0	601680000	838260000	516410000	0	0	0	0	0	0	0	0	0	0	1131900000	729420000	840470000	0	0	0	0	0	0	17489000	102510000	48208000	101940000	754030000	964080000	609030000	0.135949
Small nuclear ribonucleoprotein Sm D2	SNRPD2		6386500	26570000	33550000	33336000	338360000	2492900000	2094200000	0.0785258	0.0134582	0.0159183	0.240365	0.845459	0.171386	8657400	10877000	26809000	48484000	601680000	838260000	516410000	0.0180777	0.0319817	0.0938866	0.795936	0.340642	1.76912	136130000	27442000	41876000	27874000	1131900000	729420000	840470000	0.0242442	0.05741	0.0331648	4.96064	1.73105	2.36799	23452000	87639000	78291000	105430000	754030000	964080000	609030000	0.116227
26S proteasome non-ATPase regulatory subunit 2	PSMD2		18383000	2611200	62188000	25963000	338360000	2492900000	2094200000	0.00771722	0.024946	0.0123976	7.04006	2.01217	3.23252	41706000	100180000	21137000	9686600	601680000	838260000	516410000	0.1665	0.0252153	0.0187576	0.416311	1.34427	0.151443	77375000	24727000	13802000	16840000	1131900000	729420000	840470000	0.0218456	0.0189219	0.0200364	3.12917	0.944375	0.866166	110310000	74491000	70650000	65476000	754030000	964080000	609030000	0.0987905
Annexin A2;Putative annexin A2-like protein	ANXA2;ANXA2P2		495530000	104120000	214280000	227790000	338360000	2492900000	2094200000	0.30772	0.0859561	0.108772	4.75922	0.790242	0.279333	2325600000	1901000000	56436000	61586000	601680000	838260000	516410000	3.15949	0.0673252	0.119258	1.22336	0.564534	0.0213089	1291300000	418150000	56752000	57957000	1131900000	729420000	840470000	0.369423	0.0778043	0.0689578	3.08813	1.12829	0.21061	62147000	138950000	83841000	75646000	754030000	964080000	609030000	0.184276
C-Myc-binding protein	MYCBP		44349000	15473000	97225000	91676000	338360000	2492900000	2094200000	0.0457294	0.0390008	0.0437761	2.86622	0.890914	0.85286	30673000	75562000	13192000	22987000	601680000	838260000	516410000	0.125585	0.0157374	0.0445131	0.405932	0.353545	0.125312	52339000	38001000	22552000	27442000	1131900000	729420000	840470000	0.0335728	0.0309177	0.0326508	1.37731	0.946921	0.920917	76235000	68188000	60350000	81982000	754030000	964080000	609030000	0.0904314
Microtubule-associated protein 1B;MAP1B heavy chain;MAP1 light chain LC1	MAP1B		31739000	5306500	149540000	105180000	338360000	2492900000	2094200000	0.015683	0.0599864	0.0502244	5.98116	1.19437	3.82493	72922000	35351000	13856000	20678000	601680000	838260000	516410000	0.0587538	0.0165295	0.0400418	2.0628	0.412805	0.281335	49317000	134040000	19861000	14871000	1131900000	729420000	840470000	0.11842	0.0272285	0.0176937	0.367927	1.53888	0.229931	120230000	44029000	52742000	39205000	754030000	964080000	609030000	0.0583916
T-complex protein 1 subunit gamma	CCT3		45865000	6447000	206610000	110650000	338360000	2492900000	2094200000	0.0190537	0.0828794	0.0528364	7.11416	1.5686	4.34979	167000000	110480000	64030000	21818000	601680000	838260000	516410000	0.183619	0.0763844	0.0422494	1.51159	1.80794	0.415994	114380000	46988000	83554000	75833000	1131900000	729420000	840470000	0.0415125	0.114549	0.0902269	2.43424	1.26956	2.75937	3506500	71892000	123090000	120420000	754030000	964080000	609030000	0.0953437
Tyrosine-protein kinase JAK1	JAK1		25354000	0	48044000	41575000	338360000	2492900000	2094200000	0	0.0192723	0.0198524	∞	0.970779	∞	34455000	20988000	0	5313900	601680000	838260000	516410000	0.0348823	0	0.0102901	1.64165	0	0	43021000	11397000	5423000	0	1131900000	729420000	840470000	0.0100689	0.00743467	0	3.77477	∞	0.738379	263330000	160010000	129190000	141040000	754030000	964080000	609030000	0.212206
Histone H2A type 2-C;Histone H2A type 2-A;Histone H2A type 1-A	HIST2H2AC;HIST2H2AA3;HIST1H2AA		79769000	6664600	15701000	23489000	338360000	2492900000	2094200000	0.0196968	0.00629829	0.0112162	11.9691	0.561534	0.319762	87747000	52047000	0	6019200	601680000	838260000	516410000	0.0865028	0	0.0116559	1.68592	0	0	78552000	50110000	26974000	0	1131900000	729420000	840470000	0.0442707	0.0369801	0	1.56759	∞	0.835317	25580000	329300000	21684000	110140000	754030000	964080000	609030000	0.43672
Eukaryotic translation initiation factor 4B	EIF4B		119920000	13329000	122570000	102940000	338360000	2492900000	2094200000	0.039393	0.0491676	0.0491548	8.99692	1.00026	1.24813	23595000	51550000	100960000	100610000	601680000	838260000	516410000	0.0856768	0.12044	0.194826	0.457711	0.618193	1.40575	161160000	43514000	83680000	125270000	1131900000	729420000	840470000	0.0384433	0.114721	0.149048	3.70364	0.769696	2.98417	148570000	103490000	74038000	99748000	754030000	964080000	609030000	0.137249
Transitional endoplasmic reticulum ATPase	VCP		0	2938300	10570000	5167100	338360000	2492900000	2094200000	0.00868395	0.00424004	0.00246734	0	1.71847	0.488262	6094700	8401200	0	0	601680000	838260000	516410000	0.0139629	0	0	0.725456	0	0	7476500	0	0	0	1131900000	729420000	840470000	0	0	0	∞	0	0	203410000	105220000	37952000	187410000	754030000	964080000	609030000	0.139544
Tubulin beta chain;Tubulin beta-2B chain;Tubulin beta-2A chain	TUBB;TUBB2B;TUBB2A		198170000	13916000	182840000	129660000	338360000	2492900000	2094200000	0.0411278	0.0733443	0.0619139	14.2404	1.18462	1.78333	366290000	259290000	33857000	37276000	601680000	838260000	516410000	0.430943	0.0403896	0.072183	1.41267	0.559545	0.0937237	309160000	135500000	46650000	19865000	1131900000	729420000	840470000	0.11971	0.0639549	0.0236356	2.28162	2.70587	0.534248	313980000	138330000	258760000	219860000	754030000	964080000	609030000	0.183454
Heat shock cognate 71 kDa protein	HSPA8		284930000	35027000	266800000	158100000	338360000	2492900000	2094200000	0.10352	0.107024	0.0754942	8.13458	1.41764	1.03385	971810000	1023500000	110570000	67356000	601680000	838260000	516410000	1.70107	0.131904	0.130431	0.949497	1.01129	0.0775419	1001000000	364190000	81723000	167970000	1131900000	729420000	840470000	0.321751	0.112038	0.199852	2.74857	0.560605	0.348214	429890000	188640000	248930000	215740000	754030000	964080000	609030000	0.250176
Small nuclear ribonucleoprotein-associated protein N;Small nuclear ribonucleoprotein-associated proteins B and B	SNRPN;SNRPB		32539000	6158000	64711000	101910000	338360000	2492900000	2094200000	0.0181996	0.0259581	0.048663	5.28402	0.533427	1.42631	334080000	233440000	52512000	13396000	601680000	838260000	516410000	0.38798	0.062644	0.0259406	1.43112	2.4149	0.161462	165880000	86870000	58100000	51597000	1131900000	729420000	840470000	0.0767471	0.0796523	0.0613907	1.90952	1.29747	1.03786	40904000	352960000	147420000	161670000	754030000	964080000	609030000	0.468098
14-3-3 protein zeta/delta	YWHAZ		6580200	2707100	16501000	18277000	338360000	2492900000	2094200000	0.00800065	0.0066192	0.00872744	2.43072	0.758435	0.827333	62838000	70574000	11611000	14527000	601680000	838260000	516410000	0.117295	0.0138513	0.0281307	0.890385	0.49239	0.11809	101460000	10500000	15862000	12408000	1131900000	729420000	840470000	0.00927644	0.021746	0.0147632	9.66286	1.47299	2.34422	383410000	282790000	205750000	278620000	754030000	964080000	609030000	0.375038
Heterogeneous nuclear ribonucleoprotein H;Heterogeneous nuclear ribonucleoprotein H, N-terminally processed	HNRNPH1		88309000	25534000	145420000	152330000	338360000	2492900000	2094200000	0.075464	0.0583337	0.072739	3.45849	0.801959	0.773	176510000	98152000	121240000	65956000	601680000	838260000	516410000	0.16313	0.144633	0.12772	1.79833	1.13242	0.886612	99680000	41439000	0	18256000	1131900000	729420000	840470000	0.0366101	0	0.0217212	2.40546	0	0	607970000	245650000	216610000	215740000	754030000	964080000	609030000	0.325783
OTU domain-containing protein 4	OTUD4		10499000	683090	55830000	22273000	338360000	2492900000	2094200000	0.00201883	0.0223956	0.0106356	15.3699	2.10573	11.0934	28224000	14858000	12225000	8752800	601680000	838260000	516410000	0.0246942	0.0145838	0.0169493	1.89958	0.860434	0.590575	131830000	0	3660300	19848000	1131900000	729420000	840470000	0	0.0050181	0.0236154	∞	0.212493	∞	602210000	196190000	176220000	274260000	754030000	964080000	609030000	0.260189
Vimentin	VIM		56030000	19983000	0	12544000	338360000	2492900000	2094200000	0.0590584	0	0.00598988	2.80388	0	0	324120000	253930000	0	3478700	601680000	838260000	516410000	0.422035	0	0.00673631	1.27641	0	0	188450000	63841000	79695000	30621000	1131900000	729420000	840470000	0.0564016	0.109258	0.0364332	2.95186	2.99886	1.93714	163090000	329390000	40724000	94355000	754030000	964080000	609030000	0.436839
6-phosphofructo-2-kinase/fructose-2,6-bisphosphatase 3;6-phosphofructo-2-kinase;Fructose-2,6-bisphosphatase	PFKFB3		90256000	30958000	214070000	154830000	338360000	2492900000	2094200000	0.0914943	0.0858719	0.0739328	2.91543	1.16149	0.938549	94311000	145470000	71324000	93284000	601680000	838260000	516410000	0.241773	0.0850858	0.180639	0.648319	0.471026	0.351924	260760000	93537000	86733000	71996000	1131900000	729420000	840470000	0.0826372	0.118907	0.0856616	2.78777	1.3881	1.4389	436590000	221380000	194130000	191850000	754030000	964080000	609030000	0.293596
Putative elongation factor 1-alpha-like 3;Elongation factor 1-alpha 1;Elongation factor 1-alpha 2	EEF1A1P5;EEF1A1;EEF1A2		170580000	38331000	230270000	212770000	338360000	2492900000	2094200000	0.113285	0.0923703	0.1016	4.45018	0.90916	0.815382	783980000	622920000	101130000	111600000	601680000	838260000	516410000	1.0353	0.120643	0.216107	1.25856	0.558254	0.116529	766960000	373200000	225730000	240670000	1131900000	729420000	840470000	0.329711	0.309465	0.286352	2.05509	1.08072	0.938595	460910000	182000000	222040000	234580000	754030000	964080000	609030000	0.24137
Small nuclear ribonucleoprotein Sm D1	SNRPD1		316570000	28531000	327160000	327260000	338360000	2492900000	2094200000	0.0843214	0.131237	0.15627	11.0957	0.839809	1.55639	279960000	137660000	4577800	86836000	601680000	838260000	516410000	0.228793	0.00546107	0.168153	2.03371	0.0324768	0.0238691	232940000	127060000	35978000	0	1131900000	729420000	840470000	0.112254	0.0493241	0	1.83331	∞	0.439398	172520000	377970000	289160000	314970000	754030000	964080000	609030000	0.501267
Major vault protein	MVP		26314000	8413600	35440000	0	338360000	2492900000	2094200000	0.0248658	0.0142164	0	3.12756	∞	0.571723	158420000	204920000	0	22168000	601680000	838260000	516410000	0.34058	0	0.0429271	0.773082	0	0	157310000	62201000	0	20496000	1131900000	729420000	840470000	0.0549527	0	0.0243864	2.52906	0	0	869530000	322830000	153390000	205290000	754030000	964080000	609030000	0.428139
Tubulin beta-4B chain	TUBB4B		457490000	40053000	264600000	290600000	338360000	2492900000	2094200000	0.118374	0.106141	0.138764	11.4221	0.764905	0.896662	1275400000	988170000	142880000	93262000	601680000	838260000	516410000	1.64235	0.170448	0.180597	1.29067	0.943806	0.103783	1211400000	459290000	149760000	93714000	1131900000	729420000	840470000	0.405769	0.205314	0.111502	2.63755	1.84135	0.505987	833160000	575450000	557480000	399210000	754030000	964080000	609030000	0.763166
SUN domain-containing protein 2	SUN2		272590000	74803000	121690000	71937000	338360000	2492900000	2094200000	0.221075	0.0488146	0.0343506	3.64411	1.42107	0.220806	591310000	314260000	21868000	24449000	601680000	838260000	516410000	0.522304	0.0260874	0.0473442	1.88159	0.551016	0.0499467	321090000	107710000	27776000	22553000	1131900000	729420000	840470000	0.0951586	0.0380796	0.0268338	2.98106	1.41909	0.40017	1200700000	791840000	503980000	545270000	754030000	964080000	609030000	1.05014
Methylosome subunit pICln	CLNS1A		104140000	81094000	175670000	374100000	338360000	2492900000	2094200000	0.239668	0.0704681	0.178636	1.28419	0.394478	0.294024	469960000	358660000	286090000	104300000	601680000	838260000	516410000	0.596098	0.34129	0.201971	1.31032	1.6898	0.572541	555460000	317380000	234560000	218650000	1131900000	729420000	840470000	0.280396	0.321571	0.260152	1.75014	1.23609	1.14685	663070000	707520000	477370000	440110000	754030000	964080000	609030000	0.938318
Aflatoxin B1 aldehyde reductase member 2	AKR7A2		87831000	22203000	90383000	183330000	338360000	2492900000	2094200000	0.0656195	0.0362562	0.0875418	3.95582	0.414158	0.552522	162470000	137760000	17635000	36385000	601680000	838260000	516410000	0.228959	0.0210376	0.0704576	1.17937	0.298586	0.0918838	333370000	112280000	82423000	52918000	1131900000	729420000	840470000	0.099196	0.112998	0.0629624	2.9691	1.79469	1.13914	541260000	597400000	423620000	449940000	754030000	964080000	609030000	0.792276
Tubulin alpha-1B chain;Tubulin alpha-4A chain	TUBA1B;TUBA4A		817430000	135050000	617070000	530330000	338360000	2492900000	2094200000	0.399131	0.247531	0.253238	6.0528	0.977466	0.620175	2167300000	1713200000	261400000	135770000	601680000	838260000	516410000	2.84736	0.311836	0.262911	1.26506	1.18609	0.109518	1342800000	986180000	301420000	188320000	1131900000	729420000	840470000	0.871261	0.413232	0.224065	1.36162	1.84425	0.474293	1610800000	698640000	863600000	635360000	754030000	964080000	609030000	0.926541
Caveolin-1	CAV1		119340000	16507000	784730000	1057100000	338360000	2492900000	2094200000	0.0487853	0.314786	0.504775	7.22966	0.623616	6.45247	163010000	137730000	126020000	91086000	601680000	838260000	516410000	0.228909	0.150335	0.176383	1.18355	0.852322	0.656746	182420000	148510000	74138000	123330000	1131900000	729420000	840470000	0.131204	0.10164	0.146739	1.22833	0.692655	0.774668	343760000	2232200000	815770000	1849500000	754030000	964080000	609030000	2.96036
Histone deacetylase 1	HDAC1		978220000	338360000	2492900000	2094200000	338360000	2492900000	2094200000	1	1	1	2.89106	1	1	1462000000	601680000	838260000	516410000	601680000	838260000	516410000	1	1	1	2.42986	1	1	1935400000	1131900000	729420000	840470000	1131900000	729420000	840470000	1	1	1	1.70987	1	1	463420	754030000	964080000	609030000	754030000	964080000	609030000	1
Serine/threonine-protein kinase 38	STK38		1559600000	176500000	1347000000	1234400000	338360000	2492900000	2094200000	0.521634	0.540335	0.589437	8.83626	0.916695	1.03585	1620700000	1213200000	890560000	515220000	601680000	838260000	516410000	2.01635	1.06239	0.997696	1.33589	1.06484	0.526887	2035200000	1274100000	522480000	703650000	1131900000	729420000	840470000	1.12563	0.716295	0.83721	1.59736	0.855574	0.636351	4697900000	3399200000	2650700000	2288600000	754030000	964080000	609030000	4.50804
Methylosome protein 50	WDR77		3056500000	596990000	3009200000	2968800000	338360000	2492900000	2094200000	1.76436	1.20711	1.41763	5.11985	0.851498	0.684161	3928600000	2620900000	2025400000	1896200000	601680000	838260000	516410000	4.35597	2.4162	3.67189	1.49895	0.658025	0.554686	3065700000	2564000000	1312900000	1310400000	1131900000	729420000	840470000	2.26522	1.79992	1.55913	1.19567	1.15444	0.794592	6604600000	4258800000	3150600000	2895400000	754030000	964080000	609030000	5.64805
Protein arginine N-methyltransferase 5;Protein arginine N-methyltransferase 5, N-terminally processed	PRMT5		8104300000	1769600000	7943500000	7230800000	338360000	2492900000	2094200000	5.22993	3.18645	3.45277	4.57974	0.922866	0.609272	7685900000	4487200000	4469400000	2815300000	601680000	838260000	516410000	7.45778	5.33176	5.45168	1.71285	0.978004	0.714925	8149900000	4731000000	2913500000	2610700000	1131900000	729420000	840470000	4.1797	3.99427	3.10624	1.72266	1.28589	0.955636	14857000000	10522000000	7824300000	8218000000	754030000	964080000	609030000	13.9544
[truncated: 19 more columns]

## Sheet: S3C. Nuclear Substrate Hits
Table S3C. 5 nuclear substrate hit proteins from MDA-MB-231 cells
Enriched proteins from Table S3B showing nuclear localization (see column E).
The number of trials where each proteins shows at least 2-fold higher enrichment in mutant compared to wild type, with also higher intensity in wild type compared to the no protein control or mutant compared to mutant + SAHA, is shown in column D
The color coding of each row corresponds to the number of trials where that protein was enriched: 2 trials (grey higlight)
Protein names	Gene names	Protein ID	Number of trials enriched	Cellular localization
Microfibrillar-associated protein 1	MFAP1	P55081	2	N
Thyroid hormone receptor-associated protein 3	THRAP3	Q9Y2W1	2	N
Lysine-specific histone demethylase 1A	KDM1A	O60341	2	N/C
Chloride intracellular channel protein 1	CLIC1	O00299	2	N/C
Protein NDRG1	NDRG1	Q92597	2	N/C

## Sheet: S3D.All Associated Protein Hits
Table S3D. 7 associated protein hits from MDA-MB-231 cells
Raw values from MaxQuant label-free quantitation used in this table were taken from Table S3A: Trial 2- columns D-G; Trial 3- columns Q-T; Trial 4- columns AD-AG; Trial 5- columns AQ-AT; Trial 6- columns BD-BG
Raw data were first normalized to the levels of HDAC1 in that trial (indicated by "WT norm", "MT norm", and MT+SA norm" for each trial)
Next, the normalized values were compared to yield fold enrichment ratios: No protein control divided by wild type; mutant divided by wild type; mutant divided by mutant+ SAHA
In a case where the wild type or mutant+SAHA sample contained no intensity signal, an infinity (∞) sign is shown.
The number of trials where each protein shows a ratio of C151A to WT and a ratio of mutant to mutant + SAHA between 0.56 and 1.8, with also higher intensity in wild type compared to the no protein control, is shown in column CU (blue highlight)
The 7 proteins hits are listed in order of number of trials showing the minimal enrichment described above.
The color coding of each protein name corresponds to the number of trials where that protein was enriched: 2 trials (grey higlight)
Finally, potential protein hits were analyzed for their cellular localization (column C: N- Nucleus, C- Cytoplasm, M- Mitochondria, Mem- Membrane, ER- Endoplasmic reticulum, N/A- not available)
Protein names	Localization	Gene names	Trial 2- No protein	Trial 2- WT	Trial 2- MUT	Trial 2- MUT+SAHA	HD1 WT	HD1 MUT	HD1 MUT+SAHA	WT norm	MT norm	MT + SA norm	Trial 2- IgG/WT	Trial 2- MT/SAHA	Trial 2- MT/WT	Trial 3- No protein	Trial 3- WT	Trial 3- MUT	Trial 3- MUT+SAHA	HD1 WT	HD1 Mutant	HD1 Mutant+SAHA	WT norm	MT norm	MT + SA norm	Trial 3- IgG/WT	Trial 3- MT/SAHA	Trial 3- MT/WT	Trial 4- No protein	Trial 4- WT	Trial 4- MUT	Trial 4- MUT+SAHA	HD1 WT	HD1 Mutant	HD1 Mutant+SAHA	WT norm	MT norm	MT +SA norm	Trial 4- IgG/WT	Trial 4- MT/SAHA	Trial 4- MT/WT	Trial 5- No protein	Trial 5- WT	Trial 5- MUT	Trial 5- MUT+SAHA	HD1 WT	HD1 Mutant	HD1 Mutant+SAHA	WT norm
Serine/threonine-protein kinase 38-like	C	STK38L	21917000	6547100	66154000	100640000	338360000	2492900000	2094200000	0.0193495	0.026537	0.0480565	3.34759	0.552203	1.37145	121850000	77627000	55270000	0	601680000	838260000	516410000	0.129017	0.0659342	0	1.56969	∞	0.51105	101120000	121370000	71570000	39613000	1131900000	729420000	840470000	0.107227	0.0981191	0.047132	0.833155	2.08179	0.915061	109620000	118240000	117780000	77974000	754030000	964080000	609030000	0.156811
Histone deacetylase 1	N	HDAC1	978220000	338360000	2492900000	2094200000	338360000	2492900000	2094200000	1	1	1	2.89106	1	1	1462000000	601680000	838260000	516410000	601680000	838260000	516410000	1	1	1	2.42986	1	1	1935400000	1131900000	729420000	840470000	1131900000	729420000	840470000	1	1	1	1.70987	1	1	463420	754030000	964080000	609030000	754030000	964080000	609030000	1
Ig kappa chain V-IV region Len;Ig kappa chain V-IV region;Ig kappa chain V-IV region JI;Ig kappa chain V-IV region B17;Ig kappa chain V-IV region STH	Secreted	IGKV4-1	59026000	11198000	118250000	165760000	338360000	2492900000	2094200000	0.0330949	0.0474347	0.0791519	5.27112	0.599287	1.43329	137280000	77791000	128550000	124910000	601680000	838260000	516410000	0.12929	0.153353	0.241881	1.76473	0.634002	1.18612	118340000	135340000	178400000	157160000	1131900000	729420000	840470000	0.119569	0.244578	0.186991	0.87439	1.30797	2.0455	38278000	109580000	81774000	41655000	754030000	964080000	609030000	0.145326
Protein phosphatase 1B	C	PPM1B	48477000	4395900	77457000	82821000	338360000	2492900000	2094200000	0.0129918	0.031071	0.0395478	11.0278	0.785658	2.39159	96728000	11389000	110400000	62628000	601680000	838260000	516410000	0.0189287	0.131701	0.121276	8.49311	1.08597	6.95777	158530000	26366000	197530000	99506000	1131900000	729420000	840470000	0.0232936	0.270804	0.118393	6.01267	2.28733	11.6257	161220000	352060000	322480000	193370000	754030000	964080000	609030000	0.466904
6-phosphofructo-2-kinase/fructose-2,6-bisphosphatase 2;6-phosphofructo-2-kinase;Fructose-2,6-bisphosphatase	N/C	PFKFB2	26881000	599380	39134000	72593000	338360000	2492900000	2094200000	0.00177143	0.0156982	0.0346638	44.848	0.452869	8.86189	12929000	29038000	23853000	10170000	601680000	838260000	516410000	0.0482615	0.0284554	0.0196937	0.445244	1.4449	0.589608	11116000	24402000	8163500	0	1131900000	729420000	840470000	0.0215584	0.0111918	0	0.455536	∞	0.519136	2986000	17012000	17337000	7668000	754030000	964080000	609030000	0.0225614
T-complex protein 1 subunit theta	C	CCT8	0	2074100	70264000	63898000	338360000	2492900000	2094200000	0.00612986	0.0281856	0.0305119	0	0.923759	4.59809	25916000	52837000	54288000	23484000	601680000	838260000	516410000	0.0878158	0.0647627	0.0454755	0.49049	1.42412	0.737484	135660000	87331000	10613000	43273000	1131900000	729420000	840470000	0.0771543	0.0145499	0.0514867	1.5534	0.282596	0.188582	1707500	43081000	74918000	83429000	754030000	964080000	609030000	0.0571343
Glutathione S-transferase P	N/C/M	GSTP1	17612000	0	0	0	338360000	2492900000	2094200000	0	0	0	∞	0	0	29586000	25013000	0	0	601680000	838260000	516410000	0.0415719	0	0	1.18282	0	0	19043000	0	0	0	1131900000	729420000	840470000	0	0	0	∞	0	0	0	11186000	15555000	15816000	754030000	964080000	609030000	0.014835
Programmed cell death protein 6		PDCD6	0	2077300	8413800	12412000	338360000	2492900000	2094200000	0.00613932	0.00337511	0.00592685	0	0.569461	0.549752	50978000	27563000	0	0	601680000	838260000	516410000	0.0458101	0	0	1.84951	0	0	21821000	21646000	14532000	9256600	1131900000	729420000	840470000	0.0191236	0.0199227	0.0110136	1.00808	1.80892	1.04179	0	10115000	0	0	754030000	964080000	609030000	0.0134146
Aflatoxin B1 aldehyde reductase member 2		AKR7A2	87831000	22203000	90383000	183330000	338360000	2492900000	2094200000	0.0656195	0.0362562	0.0875418	3.95582	0.414158	0.552522	162470000	137760000	17635000	36385000	601680000	838260000	516410000	0.228959	0.0210376	0.0704576	1.17937	0.298586	0.0918838	333370000	112280000	82423000	52918000	1131900000	729420000	840470000	0.099196	0.112998	0.0629624	2.9691	1.79469	1.13914	541260000	597400000	423620000	449940000	754030000	964080000	609030000	0.792276
60S ribosomal protein L13		RPL13	0	0	9134700	0	338360000	2492900000	2094200000	0	0.00366429	0	0	∞	∞	282550000	307900000	15224000	11402000	601680000	838260000	516410000	0.511734	0.0181614	0.0220794	0.917668	0.822553	0.03549	135400000	25288000	9887800	0	1131900000	729420000	840470000	0.0223412	0.0135557	0	5.35432	∞	0.606758	0	10214000	16361000	8751600	754030000	964080000	609030000	0.0135459
60S ribosomal protein L27		RPL27	0	1373500	13021000	11096000	338360000	2492900000	2094200000	0.00405929	0.00522323	0.00529844	0	0.985805	1.28674	39154000	74660000	0	0	601680000	838260000	516410000	0.124086	0	0	0.524431	0	0	33069000	24685000	0	0	1131900000	729420000	840470000	0.0218085	0	0	1.33964	0	0	0	0	0	0	754030000	964080000	609030000	0
Histone H4		HIST1H4A	110410000	36581000	70666000	61121000	338360000	2492900000	2094200000	0.108113	0.0283469	0.0291858	3.01823	0.971255	0.262198	352080000	323110000	59744000	25573000	601680000	838260000	516410000	0.537013	0.0712714	0.0495207	1.08966	1.43922	0.132718	284430000	123400000	53060000	68235000	1131900000	729420000	840470000	0.10902	0.0727427	0.0811867	2.30494	0.895993	0.667241	7469400	135860000	18351000	57631000	754030000	964080000	609030000	0.180179
Small nuclear ribonucleoprotein Sm D3		SNRPD3	25919000	16458000	194550000	228950000	338360000	2492900000	2094200000	0.0486405	0.0780416	0.109326	1.57486	0.713845	1.60446	121550000	61468000	13411000	14747000	601680000	838260000	516410000	0.102161	0.0159986	0.0285568	1.97745	0.560239	0.156603	126220000	72959000	67641000	55414000	1131900000	729420000	840470000	0.0644571	0.0927326	0.0659322	1.73001	1.40648	1.43867	47670000	195770000	122490000	91456000	754030000	964080000	609030000	0.259632
Ig kappa chain V-II region TEW;Ig kappa chain V-II region Cum;Ig kappa chain V-II region GM607;Ig kappa chain V-II region RPMI 6410			23084000000	25788000000	45970000000	40661000000	338360000	2492900000	2094200000	76.2147	18.4404	19.416	0.895145	0.949751	0.241953	41478000000	46138000000	28592000000	13608000000	601680000	838260000	516410000	76.682	34.1087	26.3512	0.898999	1.29439	0.444808	86418000000	47624000000	44095000000	41202000000	1131900000	729420000	840470000	42.0744	60.4521	49.0226	1.81459	1.23315	1.43679	11825000000	21430000000	21884000000	15489000000	754030000	964080000	609030000	28.4206
Myosin-14		MYH14	31256000	47376000	48157000	10356000	338360000	2492900000	2094200000	0.140017	0.0193177	0.00494509	0.659743	3.90644	0.137967	116720000	1224300000	36497000	50948000	601680000	838260000	516410000	2.0348	0.043539	0.098658	0.0953361	0.441312	0.0213972	16943000	24695000	0	0	1131900000	729420000	840470000	0.0218173	0	0	0.68609	0	0	0	22263000	34773000	15668000	754030000	964080000	609030000	0.0295254
Myosin light polypeptide 6		MYL6	4888800000	456470000	757410000	1042000000	338360000	2492900000	2094200000	1.34907	0.303827	0.497565	10.71	0.610628	0.225213	14069000000	10209000000	1046600000	553300000	601680000	838260000	516410000	16.9675	1.24854	1.07144	1.3781	1.1653	0.0735842	7747600000	2175300000	228960000	260050000	1131900000	729420000	840470000	1.92181	0.313893	0.30941	3.56162	1.01449	0.163332	61498000	1090800000	1699800000	911780000	754030000	964080000	609030000	1.44663
Thioredoxin		TXN	0	0	0	0	338360000	2492900000	2094200000	0	0	0	0	0	0	0	0	0	0	601680000	838260000	516410000	0	0	0	0	0	0	0	53554000	38657000	42574000	1131900000	729420000	840470000	0.0473134	0.0529969	0.050655	0	1.04623	1.12013	0	0	0	0	754030000	964080000	609030000	0
ATP synthase subunit alpha, mitochondrial		ATP5A1	0	6519100	13901000	51858000	338360000	2492900000	2094200000	0.0192668	0.00557624	0.0247627	0	0.225187	0.289423	53544000	0	0	1692900	601680000	838260000	516410000	0	0	0.00327821	∞	0	0	80459000	50464000	40039000	34541000	1131900000	729420000	840470000	0.0445834	0.0548916	0.0410972	1.59438	1.33565	1.23121	0	0	0	2116000	754030000	964080000	609030000	0
Elongation factor 1-beta		EEF1B2	0	0	0	0	338360000	2492900000	2094200000	0	0	0	0	0	0	20535000	0	0	0	601680000	838260000	516410000	0	0	0	∞	0	0	0	0	0	0	1131900000	729420000	840470000	0	0	0	0	0	0	5584500	7681900	10215000	8407700	754030000	964080000	609030000	0.0101878
60S ribosomal protein L12		RPL12	28499000	2758800	0	13874000	338360000	2492900000	2094200000	0.00815345	0	0.00662496	10.3302	0	0	125960000	219110000	0	0	601680000	838260000	516410000	0.364164	0	0	0.574871	0	0	58081000	0	0	5442800	1131900000	729420000	840470000	0	0	0.0064759	∞	0	0	0	13319000	16838000	14834000	754030000	964080000	609030000	0.0176638
60S acidic ribosomal protein P2		RPLP2	0	6939200	35285000	40043000	338360000	2492900000	2094200000	0.0205083	0.0141542	0.0191209	0	0.740247	0.690168	96365000	211230000	0	0	601680000	838260000	516410000	0.351067	0	0	0.456209	0	0	30807000	58218000	7267600	0	1131900000	729420000	840470000	0.0514339	0.00996353	0	0.529166	∞	0.193715	0	9338700	8107900	0	754030000	964080000	609030000	0.0123851
Histone-binding protein RBBP7;Histone-binding protein RBBP4		RBBP7;RBBP4	33811000	176360	69269000	50955000	338360000	2492900000	2094200000	0.00052122	0.0277865	0.0243315	191.716	1.142	53.3105	54851000	51350000	57221000	18239000	601680000	838260000	516410000	0.0853444	0.0682616	0.0353188	1.06818	1.93273	0.799838	24402000	16643000	11261000	8592500	1131900000	729420000	840470000	0.0147036	0.0154383	0.0102234	1.4662	1.51009	1.04997	0	37837000	51919000	27973000	754030000	964080000	609030000	0.0501797
Spindlin-1		SPIN1	0	1930800	20347000	17856000	338360000	2492900000	2094200000	0.00570635	0.00816198	0.00852641	0	0.957259	1.43033	12431000	7075600	0	3725900	601680000	838260000	516410000	0.0117597	0	0.007215	1.75688	0	0	40451000	0	0	6026900	1131900000	729420000	840470000	0	0	0.00717087	∞	0	0	45534000	17159000	12148000	15390000	754030000	964080000	609030000	0.0227564
Ubiquitin-60S ribosomal protein L40;Ubiquitin;60S ribosomal protein L40;Ubiquitin-40S ribosomal protein S27a;Ubiquitin;40S ribosomal protein S27a;Polyubiquitin-B;Ubiquitin;Polyubiquitin-C;Ubiquitin		UBA52;RPS27A;UBB;UBC	196290000	53200000	220700000	213230000	338360000	2492900000	2094200000	0.157229	0.0885314	0.101819	3.68966	0.869495	0.563073	1394400000	1473000000	108470000	25915000	601680000	838260000	516410000	2.44815	0.129399	0.050183	0.94664	2.57854	0.0528559	831960000	361230000	77295000	50000000	1131900000	729420000	840470000	0.319136	0.105968	0.0594905	2.30313	1.78125	0.332046	60092000	111310000	127110000	114250000	754030000	964080000	609030000	0.14762
Histone H2B type 1-L;Histone H2B type 1-M;Histone H2B type 1-N;Histone H2B type 1-H;Histone H2B type 3-B;Histone H2B type 2-F;Histone H2B type 2-E;Histone H2B type 1-C/E/F/G/I;Histone H2B type 1-D;Histone H2B type F-S;Histone H2B type 1-B;Histone H2B type 1-O;Histone H2B type 1-J;Histone H2B type 1-K;Histone H2B type 1-A		HIST1H2BL;HIST1H2BM;HIST1H2BN;HIST1H2BH;HIST3H2BB;HIST2H2BF;HIST2H2BE;HIST1H2BC;HIST1H2BD;H2BFS;HIST1H2BB;HIST1H2BO;HIST1H2BJ;HIST1H2BK;HIST1H2BA	76005000	7234100	32825000	47647000	338360000	2492900000	2094200000	0.0213799	0.0131674	0.0227519	10.5065	0.578739	0.615878	129370000	166930000	0	0	601680000	838260000	516410000	0.27744	0	0	0.774996	0	0	97862000	61284000	9745200	14860000	1131900000	729420000	840470000	0.0541426	0.0133602	0.0176806	1.59686	0.755643	0.24676	18210000	106080000	22495000	55007000	754030000	964080000	609030000	0.140684
Inosine-5-monophosphate dehydrogenase 2		IMPDH2	0	539360	19809000	24025000	338360000	2492900000	2094200000	0.00159404	0.00794617	0.0114722	0	0.692648	4.98492	20090000	26237000	0	0	601680000	838260000	516410000	0.0436062	0	0	0.765713	0	0	31549000	19007000	0	0	1131900000	729420000	840470000	0.0167921	0	0	1.65986	0	0	79115000	30930000	19048000	2232100	754030000	964080000	609030000	0.0410196
Microtubule-associated protein 1B;MAP1B heavy chain;MAP1 light chain LC1		MAP1B	31739000	5306500	149540000	105180000	338360000	2492900000	2094200000	0.015683	0.0599864	0.0502244	5.98116	1.19437	3.82493	72922000	35351000	13856000	20678000	601680000	838260000	516410000	0.0587538	0.0165295	0.0400418	2.0628	0.412805	0.281335	49317000	134040000	19861000	14871000	1131900000	729420000	840470000	0.11842	0.0272285	0.0176937	0.367927	1.53888	0.229931	120230000	44029000	52742000	39205000	754030000	964080000	609030000	0.0583916
Histone H2A type 2-C;Histone H2A type 2-A;Histone H2A type 1-A		HIST2H2AC;HIST2H2AA3;HIST1H2AA	79769000	6664600	15701000	23489000	338360000	2492900000	2094200000	0.0196968	0.00629829	0.0112162	11.9691	0.561534	0.319762	87747000	52047000	0	6019200	601680000	838260000	516410000	0.0865028	0	0.0116559	1.68592	0	0	78552000	50110000	26974000	0	1131900000	729420000	840470000	0.0442707	0.0369801	0	1.56759	∞	0.835317	25580000	329300000	21684000	110140000	754030000	964080000	609030000	0.43672
Small nuclear ribonucleoprotein-associated protein N;Small nuclear ribonucleoprotein-associated proteins B and B		SNRPN;SNRPB	32539000	6158000	64711000	101910000	338360000	2492900000	2094200000	0.0181996	0.0259581	0.048663	5.28402	0.533427	1.42631	334080000	233440000	52512000	13396000	601680000	838260000	516410000	0.38798	0.062644	0.0259406	1.43112	2.4149	0.161462	165880000	86870000	58100000	51597000	1131900000	729420000	840470000	0.0767471	0.0796523	0.0613907	1.90952	1.29747	1.03786	40904000	352960000	147420000	161670000	754030000	964080000	609030000	0.468098
6-phosphofructo-2-kinase/fructose-2,6-bisphosphatase 3;6-phosphofructo-2-kinase;Fructose-2,6-bisphosphatase		PFKFB3	90256000	30958000	214070000	154830000	338360000	2492900000	2094200000	0.0914943	0.0858719	0.0739328	2.91543	1.16149	0.938549	94311000	145470000	71324000	93284000	601680000	838260000	516410000	0.241773	0.0850858	0.180639	0.648319	0.471026	0.351924	260760000	93537000	86733000	71996000	1131900000	729420000	840470000	0.0826372	0.118907	0.0856616	2.78777	1.3881	1.4389	436590000	221380000	194130000	191850000	754030000	964080000	609030000	0.293596
Putative elongation factor 1-alpha-like 3;Elongation factor 1-alpha 1;Elongation factor 1-alpha 2		EEF1A1P5;EEF1A1;EEF1A2	170580000	38331000	230270000	212770000	338360000	2492900000	2094200000	0.113285	0.0923703	0.1016	4.45018	0.90916	0.815382	783980000	622920000	101130000	111600000	601680000	838260000	516410000	1.0353	0.120643	0.216107	1.25856	0.558254	0.116529	766960000	373200000	225730000	240670000	1131900000	729420000	840470000	0.329711	0.309465	0.286352	2.05509	1.08072	0.938595	460910000	182000000	222040000	234580000	754030000	964080000	609030000	0.24137
Serine/threonine-protein kinase 38		STK38	1559600000	176500000	1347000000	1234400000	338360000	2492900000	2094200000	0.521634	0.540335	0.589437	8.83626	0.916695	1.03585	1620700000	1213200000	890560000	515220000	601680000	838260000	516410000	2.01635	1.06239	0.997696	1.33589	1.06484	0.526887	2035200000	1274100000	522480000	703650000	1131900000	729420000	840470000	1.12563	0.716295	0.83721	1.59736	0.855574	0.636351	4697900000	3399200000	2650700000	2288600000	754030000	964080000	609030000	4.50804
Methylosome protein 50		WDR77	3056500000	596990000	3009200000	2968800000	338360000	2492900000	2094200000	1.76436	1.20711	1.41763	5.11985	0.851498	0.684161	3928600000	2620900000	2025400000	1896200000	601680000	838260000	516410000	4.35597	2.4162	3.67189	1.49895	0.658025	0.554686	3065700000	2564000000	1312900000	1310400000	1131900000	729420000	840470000	2.26522	1.79992	1.55913	1.19567	1.15444	0.794592	6604600000	4258800000	3150600000	2895400000	754030000	964080000	609030000	5.64805
Protein arginine N-methyltransferase 5;Protein arginine N-methyltransferase 5, N-terminally processed		PRMT5	8104300000	1769600000	7943500000	7230800000	338360000	2492900000	2094200000	5.22993	3.18645	3.45277	4.57974	0.922866	0.609272	7685900000	4487200000	4469400000	2815300000	601680000	838260000	516410000	7.45778	5.33176	5.45168	1.71285	0.978004	0.714925	8149900000	4731000000	2913500000	2610700000	1131900000	729420000	840470000	4.1797	3.99427	3.10624	1.72266	1.28589	0.955636	14857000000	10522000000	7824300000	8218000000	754030000	964080000	609030000	13.9544
Coordinator of PRMT5 and differentiation stimulator		COPRS	0	1887100	7783500	11569000	338360000	2492900000	2094200000	0.0055772	0.00312227	0.00552431	0	0.565187	0.559827	7897300	11901000	0	0	601680000	838260000	516410000	0.0197796	0	0	0.663583	0	0	27622000	29999000	10563000	6318400	1131900000	729420000	840470000	0.0265032	0.0144814	0.0075177	0.920764	1.9263	0.5464	4934800	10911000	0	0	754030000	964080000	609030000	0.0144702
Alpha-enolase		ENO1	0	7250300	45136000	19114000	338360000	2492900000	2094200000	0.0214278	0.0181058	0.00912711	0	1.98374	0.84497	66820000	28420000	47255000	1699100	601680000	838260000	516410000	0.0472344	0.0563727	0.00329022	2.35116	17.1334	1.19347	137450000	9295000	4158600	26884000	1131900000	729420000	840470000	0.00821186	0.00570124	0.0319869	14.7875	0.178237	0.69427	13346000	16584000	36818000	41532000	754030000	964080000	609030000	0.0219938
Zinc finger and BTB domain-containing protein 14		ZBTB14	16140000	7561800	54251000	0	338360000	2492900000	2094200000	0.0223484	0.0217622	0	2.13441	∞	0.973771	0	0	0	0	601680000	838260000	516410000	0	0	0	0	0	0	0	0	0	20022000	1131900000	729420000	840470000	0	0	0.0238224	0	0	0	10867000	44338000	29916000	26152000	754030000	964080000	609030000	0.0588014
T-complex protein 1 subunit gamma		CCT3	45865000	6447000	206610000	110650000	338360000	2492900000	2094200000	0.0190537	0.0828794	0.0528364	7.11416	1.5686	4.34979	167000000	110480000	64030000	21818000	601680000	838260000	516410000	0.183619	0.0763844	0.0422494	1.51159	1.80794	0.415994	114380000	46988000	83554000	75833000	1131900000	729420000	840470000	0.0415125	0.114549	0.0902269	2.43424	1.26956	2.75937	3506500	71892000	123090000	120420000	754030000	964080000	609030000	0.0953437
Thyroid hormone receptor-associated protein 3		THRAP3	0	470660	9905700	7452500	338360000	2492900000	2094200000	0.001391	0.00397356	0.00355864	0	1.1166	2.85662	10784000	0	0	0	601680000	838260000	516410000	0	0	0	∞	0	0	16385000	0	0	0	1131900000	729420000	840470000	0	0	0	∞	0	0	33367000	54980000	90385000	36443000	754030000	964080000	609030000	0.0729149
BolA-like protein 2		BOLA2	0	1962400	23798000	15162000	338360000	2492900000	2094200000	0.00579974	0.00954631	0.00724	0	1.31855	1.64599	0	0	9565700	0	601680000	838260000	516410000	0	0.0114114	0	0	∞	∞	0	0	0	0	1131900000	729420000	840470000	0	0	0	0	0	0	0	0	0	0	754030000	964080000	609030000	0
Calmodulin		CALM1	85422000	20252000	0	29634000	338360000	2492900000	2094200000	0.0598534	0	0.0141505	4.21795	0	0	725190000	714600000	31649000	0	601680000	838260000	516410000	1.18767	0.0377556	0	1.01482	∞	0.0317895	510060000	256650000	7403600	11548000	1131900000	729420000	840470000	0.226743	0.01015	0.0137399	1.98738	0.738721	0.0447643	0	60056000	57037000	20183000	754030000	964080000	609030000	0.0796467
14-3-3 protein beta/alpha;14-3-3 protein beta/alpha, N-terminally processed		YWHAB	0	303560	3918700	0	338360000	2492900000	2094200000	0.000897151	0.00157194	0	0	∞	1.75215	0	0	0	0	601680000	838260000	516410000	0	0	0	0	0	0	0	0	0	0	1131900000	729420000	840470000	0	0	0	0	0	0	191540	0	7447500	1189300	754030000	964080000	609030000	0
Voltage-dependent anion-selective channel protein 1		VDAC1	0	0	0	0	338360000	2492900000	2094200000	0	0	0	0	0	0	0	0	0	0	601680000	838260000	516410000	0	0	0	0	0	0	0	0	0	0	1131900000	729420000	840470000	0	0	0	0	0	0	0	1307400	0	1347400	754030000	964080000	609030000	0.00173388
MOB kinase activator 2		MOB2	30650000	11441000	60904000	132160000	338360000	2492900000	2094200000	0.0338131	0.024431	0.0631076	2.67896	0.387132	0.72253	128980000	70383000	0	10152000	601680000	838260000	516410000	0.116977	0	0.0196588	1.83254	0	0	91210000	45076000	34061000	10325000	1131900000	729420000	840470000	0.0398233	0.046696	0.0122848	2.02347	3.80112	1.17258	11831000	57534000	78196000	17880000	754030000	964080000	609030000	0.076302
78 kDa glucose-regulated protein		HSPA5	99205000	36297000	262020000	351100000	338360000	2492900000	2094200000	0.107273	0.105107	0.167654	2.73315	0.626927	0.979801	759940000	751390000	110380000	72684000	601680000	838260000	516410000	1.24882	0.131678	0.140749	1.01138	0.935551	0.105442	854140000	383880000	158580000	174090000	1131900000	729420000	840470000	0.339147	0.217406	0.207134	2.22502	1.04959	0.641037	141710000	74982000	73345000	78069000	754030000	964080000	609030000	0.0994417
60S ribosomal protein L10a		RPL10A	0	5725700	0	20803000	338360000	2492900000	2094200000	0.0169219	0	0.00993363	0	0	0	170730000	185830000	0	7887500	601680000	838260000	516410000	0.308852	0	0.0152737	0.918743	0	0	111760000	21982000	0	0	1131900000	729420000	840470000	0.0194204	0	0	5.08416	0	0	0	8854400	15057000	5590500	754030000	964080000	609030000	0.0117428
60S acidic ribosomal protein P0;60S acidic ribosomal protein P0-like		RPLP0;RPLP0P6	98063000	421030	19776000	57495000	338360000	2492900000	2094200000	0.00124433	0.00793293	0.0274544	232.912	0.288949	6.37528	382430000	462000000	7915400	8883700	601680000	838260000	516410000	0.76785	0.00944266	0.0172028	0.827771	0.548902	0.0122975	217910000	146240000	15866000	7833500	1131900000	729420000	840470000	0.129199	0.0217515	0.00932038	1.49008	2.33376	0.168357	16063000	33553000	24811000	13925000	754030000	964080000	609030000	0.0444982
60S acidic ribosomal protein P1		RPLP1	23921000	22206000	0	0	338360000	2492900000	2094200000	0.0656283	0	0	1.07723	0	0	113100000	139190000	5904700	0	601680000	838260000	516410000	0.231336	0.007044	0	0.812558	∞	0.0304493	25298000	18457000	0	0	1131900000	729420000	840470000	0.0163062	0	0	1.37065	0	0	0	24931000	20108000	10095000	754030000	964080000	609030000	0.0330637
ADP/ATP translocase 2;ADP/ATP translocase 2, N-terminally processed;ADP/ATP translocase 1		SLC25A5;SLC25A4	99764000	7171300	12401000	48388000	338360000	2492900000	2094200000	0.0211943	0.00497453	0.0231057	13.9116	0.215294	0.234711	111920000	63894000	88745000	27877000	601680000	838260000	516410000	0.106193	0.105868	0.0539823	1.75165	1.96116	0.996944	92916000	15755000	8780300	0	1131900000	729420000	840470000	0.0139191	0.0120374	0	5.89756	∞	0.864811	0	10457000	20731000	17639000	754030000	964080000	609030000	0.0138681
26S proteasome non-ATPase regulatory subunit 11		PSMD11	0	0	0	0	338360000	2492900000	2094200000	0	0	0	0	0	0	0	0	0	0	601680000	838260000	516410000	0	0	0	0	0	0	4165500	0	0	0	1131900000	729420000	840470000	0	0	0	∞	0	0	16321000	14428000	3473000	0	754030000	964080000	609030000	0.0191345
Myosin light chain 1/3, skeletal muscle isoform;Myosin light chain 3		MYL1;MYL3	69495000	6871900	0	0	338360000	2492900000	2094200000	0.0203094	0	0	10.1129	0	0	767460000	491900000	0	31685000	601680000	838260000	516410000	0.817544	0	0.0613563	1.5602	0	0	534270000	0	0	0	1131900000	729420000	840470000	0	0	0	∞	0	0	0	68742000	89904000	26421000	754030000	964080000	609030000	0.0911661
Elongation factor Tu, mitochondrial		TUFM	56339000	0	33207000	45202000	338360000	2492900000	2094200000	0	0.0133206	0.0215844	∞	0.617142	∞	43411000	52812000	0	6797600	601680000	838260000	516410000	0.0877742	0	0.0131632	0.821991	0	0	18086000	22860000	2370500	0	1131900000	729420000	840470000	0.0201961	0.00324984	0	0.791164	∞	0.160914	43185000	39123000	53905000	41275000	754030000	964080000	609030000	0.0518852
Stress-70 protein, mitochondrial		HSPA9	52776000	4077100	103100000	72163000	338360000	2492900000	2094200000	0.0120496	0.0413575	0.0344585	12.9445	1.20021	3.43227	177960000	157870000	43114000	15945000	601680000	838260000	516410000	0.262382	0.0514327	0.0308766	1.12726	1.66575	0.196022	196640000	115010000	86443000	51291000	1131900000	729420000	840470000	0.101608	0.118509	0.0610266	1.70976	1.94193	1.16634	85065000	19116000	34228000	10006000	754030000	964080000	609030000	0.0253518
Eukaryotic translation initiation factor 4B		EIF4B	119920000	13329000	122570000	102940000	338360000	2492900000	2094200000	0.039393	0.0491676	0.0491548	8.99692	1.00026	1.24813	23595000	51550000	100960000	100610000	601680000	838260000	516410000	0.0856768	0.12044	0.194826	0.457711	0.618193	1.40575	161160000	43514000	83680000	125270000	1131900000	729420000	840470000	0.0384433	0.114721	0.149048	3.70364	0.769696	2.98417	148570000	103490000	74038000	99748000	754030000	964080000	609030000	0.137249
Transitional endoplasmic reticulum ATPase		VCP	0	2938300	10570000	5167100	338360000	2492900000	2094200000	0.00868395	0.00424004	0.00246734	0	1.71847	0.488262	6094700	8401200	0	0	601680000	838260000	516410000	0.0139629	0	0	0.725456	0	0	7476500	0	0	0	1131900000	729420000	840470000	0	0	0	∞	0	0	203410000	105220000	37952000	187410000	754030000	964080000	609030000	0.139544
Vimentin		VIM	56030000	19983000	0	12544000	338360000	2492900000	2094200000	0.0590584	0	0.00598988	2.80388	0	0	324120000	253930000	0	3478700	601680000	838260000	516410000	0.422035	0	0.00673631	1.27641	0	0	188450000	63841000	79695000	30621000	1131900000	729420000	840470000	0.0564016	0.109258	0.0364332	2.95186	2.99886	1.93714	163090000	329390000	40724000	94355000	754030000	964080000	609030000	0.436839
Small nuclear ribonucleoprotein Sm D1		SNRPD1	316570000	28531000	327160000	327260000	338360000	2492900000	2094200000	0.0843214	0.131237	0.15627	11.0957	0.839809	1.55639	279960000	137660000	4577800	86836000	601680000	838260000	516410000	0.228793	0.00546107	0.168153	2.03371	0.0324768	0.0238691	232940000	127060000	35978000	0	1131900000	729420000	840470000	0.112254	0.0493241	0	1.83331	∞	0.439398	172520000	377970000	289160000	314970000	754030000	964080000	609030000	0.501267
Tubulin alpha-1B chain;Tubulin alpha-4A chain		TUBA1B;TUBA4A	817430000	135050000	617070000	530330000	338360000	2492900000	2094200000	0.399131	0.247531	0.253238	6.0528	0.977466	0.620175	2167300000	1713200000	261400000	135770000	601680000	838260000	516410000	2.84736	0.311836	0.262911	1.26506	1.18609	0.109518	1342800000	986180000	301420000	188320000	1131900000	729420000	840470000	0.871261	0.413232	0.224065	1.36162	1.84425	0.474293	1610800000	698640000	863600000	635360000	754030000	964080000	609030000	0.926541
Enhancer of rudimentary homolog		ERH	51715000	11495000	88117000	113360000	338360000	2492900000	2094200000	0.0339727	0.0353472	0.0541305	4.49891	0.653	1.04046	94852000	64155000	59054000	79159000	601680000	838260000	516410000	0.106626	0.0704483	0.153287	1.47848	0.459584	0.660702	67567000	37102000	66334000	44728000	1131900000	729420000	840470000	0.0327785	0.0909407	0.0532178	1.82111	1.70884	2.7744	16387000	53589000	133530000	50698000	754030000	964080000	609030000	0.0710701
26S proteasome non-ATPase regulatory subunit 8		PSMD8	0	0	0	0	338360000	2492900000	2094200000	0	0	0	0	0	0	16711000	0	0	0	601680000	838260000	516410000	0	0	0	∞	0	0	17168000	19667000	24823000	26508000	1131900000	729420000	840470000	0.0173752	0.0340311	0.0315395	0.872934	1.079	1.9586	0	3357600	0	0	754030000	964080000	609030000	0.00445287
Myosin-9		MYH9	3555900000	4393700000	7597000000	5651200000	338360000	2492900000	2094200000	12.9853	3.04745	2.6985	0.809318	1.12931	0.234685	29462000000	153280000000	5489300000	3772300000	601680000	838260000	516410000	254.753	6.54845	7.30485	0.19221	0.896451	0.025705	12639000000	3499200000	5008600000	1097700000	1131900000	729420000	840470000	3.09144	6.86655	1.30605	3.61197	5.25748	2.22115	97609000	9360300000	15175000000	5059600000	754030000	964080000	609030000	12.4137
Myosin regulatory light chain 12B		MYL12B	2139100000	452640000	820820000	773490000	338360000	2492900000	2094200000	1.33775	0.329263	0.369349	4.72583	0.89147	0.246133	14824000000	13259000000	679720000	319800000	601680000	838260000	516410000	22.0366	0.81087	0.619275	1.11803	1.30939	0.0367965	7280400000	2606500000	283840000	202090000	1131900000	729420000	840470000	2.30277	0.389131	0.240449	2.79317	1.61835	0.168984	9681200	1109900000	1472400000	503650000	754030000	964080000	609030000	1.47196
Guanine nucleotide-binding protein G(I)/G(S)/G(T) subunit beta-2;Guanine nucleotide-binding protein subunit beta-4		GNB2;GNB4	44149000	22114000	14509000	0	338360000	2492900000	2094200000	0.0653564	0.00582013	0	1.99643	∞	0.0890521	217510000	221360000	0	0	601680000	838260000	516410000	0.367903	0	0	0.982608	0	0	75772000	21105000	11425000	0	1131900000	729420000	840470000	0.0186456	0.0156631	0	3.59024	∞	0.840042	0	0	7207500	10248000	754030000	964080000	609030000	0
Acetyl-coenzyme A synthetase, cytoplasmic		ACSS2	406530000	76673000	1314700000	1180700000	338360000	2492900000	2094200000	0.226602	0.527378	0.563795	5.30213	0.935407	2.32733	278830000	534000000	100070000	104840000	601680000	838260000	516410000	0.887515	0.119378	0.203017	0.522154	0.588021	0.134508	209820000	207690000	0	180920000	1131900000	729420000	840470000	0.183488	0	0.215261	1.01026	0	0	456580000	421400000	265820000	9882400	754030000	964080000	609030000	0.558864
Dihydrolipoyllysine-residue succinyltransferase component of 2-oxoglutarate dehydrogenase complex, mitochondrial		DLST	33321000	9090800	93041000	99842000	338360000	2492900000	2094200000	0.0268672	0.0373224	0.0476755	3.66535	0.782842	1.38914	108670000	109600000	79546000	78538000	601680000	838260000	516410000	0.182157	0.0948942	0.152085	0.991515	0.623957	0.520948	46913000	62211000	59737000	7099100	1131900000	729420000	840470000	0.0549616	0.0818966	0.00844658	0.754095	9.69582	1.49007	6853000	0	0	0	754030000	964080000	609030000	0
Glyceraldehyde-3-phosphate dehydrogenase		GAPDH	0	2738300	23622000	38842000	338360000	2492900000	2094200000	0.00809286	0.00947571	0.0185474	0	0.510891	1.17087	69390000	67337000	0	14770000	601680000	838260000	516410000	0.111915	0	0.0286013	1.03049	0	0	285780000	85061000	18346000	0	1131900000	729420000	840470000	0.0751489	0.0251515	0	3.35971	∞	0.334689	14047000	4740800	21969000	22817000	754030000	964080000	609030000	0.00628728
Ras GTPase-activating protein-binding protein 1		G3BP1	0	530070	0	5583900	338360000	2492900000	2094200000	0.00156659	0	0.00266636	0	0	0	0	0	0	0	601680000	838260000	516410000	0	0	0	0	0	0	9518800	0	6759300	0	1131900000	729420000	840470000	0	0.00926668	0	∞	∞	∞	16484000	17260000	18323000	0	754030000	964080000	609030000	0.0228903
Peptidyl-prolyl cis-trans isomerase A;Peptidyl-prolyl cis-trans isomerase A, N-terminally processed		PPIA	0	4984000	15577000	23646000	338360000	2492900000	2094200000	0.0147299	0.00624855	0.0112912	0	0.5534	0.424209	24725000	59034000	16522000	0	601680000	838260000	516410000	0.0981153	0.0197099	0	0.418826	∞	0.200885	89967000	59828000	0	0	1131900000	729420000	840470000	0.0528563	0	0	1.50376	0	0	0	17644000	29841000	44278000	754030000	964080000	609030000	0.0233996
26S proteasome non-ATPase regulatory subunit 2		PSMD2	18383000	2611200	62188000	25963000	338360000	2492900000	2094200000	0.00771722	0.024946	0.0123976	7.04006	2.01217	3.23252	41706000	100180000	21137000	9686600	601680000	838260000	516410000	0.1665	0.0252153	0.0187576	0.416311	1.34427	0.151443	77375000	24727000	13802000	16840000	1131900000	729420000	840470000	0.0218456	0.0189219	0.0200364	3.12917	0.944375	0.866166	110310000	74491000	70650000	65476000	754030000	964080000	609030000	0.0987905
Heat shock cognate 71 kDa protein		HSPA8	284930000	35027000	266800000	158100000	338360000	2492900000	2094200000	0.10352	0.107024	0.0754942	8.13458	1.41764	1.03385	971810000	1023500000	110570000	67356000	601680000	838260000	516410000	1.70107	0.131904	0.130431	0.949497	1.01129	0.0775419	1001000000	364190000	81723000	167970000	1131900000	729420000	840470000	0.321751	0.112038	0.199852	2.74857	0.560605	0.348214	429890000	188640000	248930000	215740000	754030000	964080000	609030000	0.250176
Tubulin beta-4B chain		TUBB4B	457490000	40053000	264600000	290600000	338360000	2492900000	2094200000	0.118374	0.106141	0.138764	11.4221	0.764905	0.896662	1275400000	988170000	142880000	93262000	601680000	838260000	516410000	1.64235	0.170448	0.180597	1.29067	0.943806	0.103783	1211400000	459290000	149760000	93714000	1131900000	729420000	840470000	0.405769	0.205314	0.111502	2.63755	1.84135	0.505987	833160000	575450000	557480000	399210000	754030000	964080000	609030000	0.763166
Methylosome subunit pICln		CLNS1A	104140000	81094000	175670000	374100000	338360000	2492900000	2094200000	0.239668	0.0704681	0.178636	1.28419	0.394478	0.294024	469960000	358660000	286090000	104300000	601680000	838260000	516410000	0.596098	0.34129	0.201971	1.31032	1.6898	0.572541	555460000	317380000	234560000	218650000	1131900000	729420000	840470000	0.280396	0.321571	0.260152	1.75014	1.23609	1.14685	663070000	707520000	477370000	440110000	754030000	964080000	609030000	0.938318
Microfibrillar-associated protein 1		MFAP1	0	0	2427600	0	338360000	2492900000	2094200000	0	0.000973806	0	0	∞	∞	0	0	0	0	601680000	838260000	516410000	0	0	0	0	0	0	0	0	0	0	1131900000	729420000	840470000	0	0	0	0	0	0	0	942200	1468200	0	754030000	964080000	609030000	0.00124955
40S ribosomal protein S4, X isoform;40S ribosomal protein S4, Y isoform 1		RPS4X;RPS4Y1	0	0	9309400	4814600	338360000	2492900000	2094200000	0	0.00373437	0.00229902	0	1.62433	∞	8519600	22707000	0	5090400	601680000	838260000	516410000	0.0377393	0	0.00985728	0.375197	0	0	15952000	12535000	0	2573500	1131900000	729420000	840470000	0.0110743	0	0.00306198	1.2726	0	0	0	4852200	0	0	754030000	964080000	609030000	0.00643502
Protein Daple		CCDC88C	0	0	32263000	0	338360000	2492900000	2094200000	0	0.012942	0	0	∞	∞	0	0	0	0	601680000	838260000	516410000	0	0	0	0	0	0	0	0	0	0	1131900000	729420000	840470000	0	0	0	0	0	0	34019000	20467000	2454600	19258000	754030000	964080000	609030000	0.0271435
60S ribosomal protein L24		RPL24	0	0	5367400	0	338360000	2492900000	2094200000	0	0.00215307	0	0	∞	∞	57618000	116260000	0	0	601680000	838260000	516410000	0.193226	0	0	0.495596	0	0	63455000	33349000	6322500	5006700	1131900000	729420000	840470000	0.0294629	0.00866785	0.00595702	1.90276	1.45506	0.294196	0	0	0	0	754030000	964080000	609030000	0
Transgelin-2;Transgelin-3		TAGLN2;TAGLN3	0	0	5505300	0	338360000	2492900000	2094200000	0	0.00220839	0	0	∞	∞	0	0	0	0	601680000	838260000	516410000	0	0	0	0	0	0	9685600	0	0	0	1131900000	729420000	840470000	0	0	0	∞	0	0	0	0	2101100	0	754030000	964080000	609030000	0
Lysine-specific histone demethylase 1A		KDM1A	0	0	6300200	0	338360000	2492900000	2094200000	0	0.00252726	0	0	∞	∞	0	0	0	0	601680000	838260000	516410000	0	0	0	0	0	0	0	0	0	0	1131900000	729420000	840470000	0	0	0	0	0	0	0	0	38802000	10581000	754030000	964080000	609030000	0
Chloride intracellular channel protein 1		CLIC1	0	0	5967000	0	338360000	2492900000	2094200000	0	0.0023936	0	0	∞	∞	0	0	0	0	601680000	838260000	516410000	0	0	0	0	0	0	0	0	0	0	1131900000	729420000	840470000	0	0	0	0	0	0	0	0	4976300	0	754030000	964080000	609030000	0
Protein NDRG1		NDRG1	0	0	0	0	338360000	2492900000	2094200000	0	0	0	0	0	0	0	0	0	0	601680000	838260000	516410000	0	0	0	0	0	0	6386700	0	0	0	1131900000	729420000	840470000	0	0	0	∞	0	0	0	0	4861500	0	754030000	964080000	609030000	0
Tropomodulin-3		TMOD3	522510000	151400000	62465000	60875000	338360000	2492900000	2094200000	0.447452	0.0250572	0.0290684	3.45119	0.862008	0.0559996	2424400000	1831500000	0	0	601680000	838260000	516410000	3.04398	0	0	1.32372	0	0	1308400000	501670000	0	3139200	1131900000	729420000	840470000	0.443211	0	0.00373505	2.60809	0	0	26505000	84297000	225820000	37992000	754030000	964080000	609030000	0.111795
T-complex protein 1 subunit eta		CCT7	25625000	26829000	74839000	74070000	338360000	2492900000	2094200000	0.0792913	0.0300209	0.0353691	0.955123	0.848787	0.378615	92285000	68008000	62353000	61710000	601680000	838260000	516410000	0.11303	0.0743838	0.119498	1.35697	0.622469	0.658088	187180000	38989000	77205000	66710000	1131900000	729420000	840470000	0.0344456	0.105844	0.0793723	4.80084	1.33352	3.0728	15695000	23685000	210070000	79744000	754030000	964080000	609030000	0.0314112
T-complex protein 1 subunit beta		CCT2	1003600000	5142600	98078000	50255000	338360000	2492900000	2094200000	0.0151986	0.0393429	0.0239972	195.154	1.63948	2.58859	75088000	86651000	33537000	32656000	601680000	838260000	516410000	0.144015	0.0400079	0.0632366	0.866557	0.63267	0.277803	129500000	45133000	46429000	63890000	1131900000	729420000	840470000	0.0398737	0.0636519	0.076017	2.8693	0.837338	1.59634	0	73222000	686350000	259280000	754030000	964080000	609030000	0.0971075
T-complex protein 1 subunit zeta		CCT6A	37633000	10622000	46971000	124920000	338360000	2492900000	2094200000	0.0313926	0.0188419	0.0596505	3.54293	0.315872	0.600202	135830000	111670000	151530000	62348000	601680000	838260000	516410000	0.185597	0.180767	0.120734	1.21635	1.49724	0.973978	116480000	91589000	51985000	33074000	1131900000	729420000	840470000	0.0809162	0.071269	0.0393518	1.27177	1.81107	0.880775	20324000	86142000	658080000	277810000	754030000	964080000	609030000	0.114242
Actin, alpha cardiac muscle 1;Actin, gamma-enteric smooth muscle;Actin, aortic smooth muscle;Actin, alpha skeletal muscle		ACTC1;ACTG2;ACTA2;ACTA1	3324700000	396640000	814180000	952260000	338360000	2492900000	2094200000	1.17224	0.3266	0.454713	8.38216	0.718254	0.278611	13815000000	13687000000	81178000	0	601680000	838260000	516410000	22.748	0.0968411	0	1.00935	∞	0.00425713	7809600000	2901800000	47358000	73027000	1131900000	729420000	840470000	2.56365	0.0649256	0.0868883	2.6913	0.74723	0.0253254	0	22064000	239970000	13963000	754030000	964080000	609030000	0.0292614
T-complex protein 1 subunit alpha		TCP1	6303000	818220	84147000	143050000	338360000	2492900000	2094200000	0.00241819	0.0337547	0.0683077	7.70331	0.494156	13.9586	72857000	44540000	11040000	5388100	601680000	838260000	516410000	0.0740261	0.0131701	0.0104338	1.63577	1.26226	0.177912	130910000	48405000	27119000	83215000	1131900000	729420000	840470000	0.0427644	0.0371789	0.0990101	2.70447	0.375506	0.869388	9352500	57694000	806050000	233640000	754030000	964080000	609030000	0.0765142
DnaJ homolog subfamily C member 10		DNAJC10	0	0	6815300	0	338360000	2492900000	2094200000	0	0.00273388	0	0	∞	∞	0	0	0	0	601680000	838260000	516410000	0	0	0	0	0	0	0	0	0	0	1131900000	729420000	840470000	0	0	0	0	0	0	11446000	5613300	5869900	0	754030000	964080000	609030000	0.0074444
26S proteasome non-ATPase regulatory subunit 13		PSMD13	0	0	0	12046000	338360000	2492900000	2094200000	0	0	0.00575208	0	0	0	4329800	4523900	5486000	0	601680000	838260000	516410000	0.00751878	0.00654451	0	0.957095	∞	0.870422	0	13414000	13027000	0	1131900000	729420000	840470000	0.0118509	0.0178594	0	0	∞	1.50701	7011100	0	0	0	754030000	964080000	609030000	0
Tropomyosin alpha-4 chain		TPM4	12492000	12679000	0	10696000	338360000	2492900000	2094200000	0.0374719	0	0.00510744	#NAME?	#NAME?	#NAME?	1258000000	985890000	23208000	5134000	601680000	838260000	516410000	1.63856	0.0276859	0.00994171	#NAME?	#NAME?	#NAME?	496500000	85916000	0	20117000	1131900000	729420000	840470000	0.0759042	0	0.0239354	#NAME?	#NAME?	#NAME?	0	11551000	60996000	24094000	754030000	964080000	609030000	0.015319
Myosin-10		MYH10	445910000	569970000	1722400000	1146100000	338360000	2492900000	2094200000	1.68451	0.690922	0.547273	0.782339	1.26248	0.410163	2957400000	22268000000	480050000	283220000	601680000	838260000	516410000	37.0097	0.572674	0.54844	0.132809	1.04419	0.0154736	1658200000	408040000	197890000	33590000	1131900000	729420000	840470000	0.360491	0.271298	0.0399657	4.06382	6.78826	0.752578	16864000	1688900000	3342300000	473480000	754030000	964080000	609030000	2.23983
Nuclease-sensitive element-binding protein 1		YBX1	0	0	0	1735800	338360000	2492900000	2094200000	0	0	0.000828861	0	0	0	8109600	40866000	11598000	0	601680000	838260000	516410000	0.0679198	0.0138358	0	0.198444	∞	0.203708	65435000	13840000	0	0	1131900000	729420000	840470000	0.0122272	0	0	4.72796	0	0	0	3199200	5906900	978180	754030000	964080000	609030000	0.0042428
Unconventional myosin-VI		MYO6	455220000	31978000	151780000	61643000	338360000	2492900000	2094200000	0.0945088	0.0608849	0.0294351	14.2354	2.06845	0.644225	5132300000	2171700000	23017000	39598000	601680000	838260000	516410000	3.60939	0.0274581	0.0766794	2.36326	0.358089	0.00760739	2078900000	142160000	18665000	18715000	1131900000	729420000	840470000	0.125594	0.0255888	0.0222673	14.6237	1.14917	0.203742	26153000	185350000	317170000	32708000	754030000	964080000	609030000	0.245813
Eukaryotic translation initiation factor 5A-2;Eukaryotic translation initiation factor 5A-1-like;Eukaryotic translation initiation factor 5A-1		EIF5A2;EIF5AL1;EIF5A	0	0	0	0	338360000	2492900000	2094200000	0	0	0	0	0	0	0	0	5143800	0	601680000	838260000	516410000	0	0.00613628	0	0	∞	∞	10898000	0	0	0	1131900000	729420000	840470000	0	0	0	∞	0	0	0	0	0	0	754030000	964080000	609030000	0
Uncharacterized protein KIAA0226-like		KIAA0226L	0	0	0	0	338360000	2492900000	2094200000	0	0	0	0	0	0	0	0	9060500	0	601680000	838260000	516410000	0	0.0108087	0	0	∞	∞	0	0	0	0	1131900000	729420000	840470000	0	0	0	0	0	0	0	0	0	0	754030000	964080000	609030000	0
Spectrin alpha chain, non-erythrocytic 1		SPTAN1	0	0	0	0	338360000	2492900000	2094200000	0	0	0	0	0	0	23377000	240170000	0	0	601680000	838260000	516410000	0.399166	0	0	0.0973352	0	0	0	0	8852900	0	1131900000	729420000	840470000	0	0.0121369	0	0	∞	∞	0	0	0	0	754030000	964080000	609030000	0
Inactive tyrosine-protein kinase 7		PTK7	0	0	1384800	0	338360000	2492900000	2094200000	0	0.000555498	0	0	∞	∞	7724500	0	0	370750	601680000	838260000	516410000	0	0	0.000717937	∞	0	0	0	1961500	0	3410500	1131900000	729420000	840470000	0.00173293	0	0.00405785	0	0	0	0	0	0	0	754030000	964080000	609030000	0
Golgin subfamily A member 2		GOLGA2	0	0	21968000	11427000	338360000	2492900000	2094200000	0	0.00881223	0.0054565	0	1.615	∞	26284000	11312000	25034000	23260000	601680000	838260000	516410000	0.0188007	0.0298642	0.0450417	2.32355	0.663035	1.58847	22163000	8403900	28829000	13137000	1131900000	729420000	840470000	0.0074246	0.0395232	0.0156305	2.63723	2.52859	5.32328	0	0	0	0	754030000	964080000	609030000	0
Galectin-1		LGALS1	0	0	14450000	8263100	338360000	2492900000	2094200000	0	0.00579646	0.00394571	0	1.46906	∞	7870400	0	0	0	601680000	838260000	516410000	0	0	0	∞	0	0	0	11424000	0	0	1131900000	729420000	840470000	0.0100928	0	0	0	0	0	0	0	0	0	754030000	964080000	609030000	0
EF-hand calcium-binding domain-containing protein 5		EFCAB5	0	0	36639000	11461000	338360000	2492900000	2094200000	0	0.0146973	0.00547273	0	2.68556	∞	16289000	0	0	0	601680000	838260000	516410000	0	0	0	∞	0	0	0	16659000	0	0	1131900000	729420000	840470000	0.0147177	0	0	0	0	0	0	0	0	0	754030000	964080000	609030000	0
Protein S100-A6		S100A6	0	0	16978000	0	338360000	2492900000	2094200000	0	0.00681054	0	0	∞	∞	19801000	45427000	0	8297800	601680000	838260000	516410000	0.0755003	0	0.0160682	0.435886	0	0	20455000	19183000	3974600	4323600	1131900000	729420000	840470000	0.0169476	0.00544899	0.00514426	1.06631	1.05924	0.321519	0	0	0	0	754030000	964080000	609030000	0
Synaptotagmin-9		SYT9	0	0	0	0	338360000	2492900000	2094200000	0	0	0	0	0	0	37216000	37819000	0	0	601680000	838260000	516410000	0.0628557	0	0	0.984056	0	0	0	35075000	54875000	0	1131900000	729420000	840470000	0.0309877	0.075231	0	0	∞	2.42777	0	0	0	0	754030000	964080000	609030000	0
Pancreatic alpha-amylase		AMY2A	0	0	0	0	338360000	2492900000	2094200000	0	0	0	0	0	0	6240200	4917000	8186000	5845200	601680000	838260000	516410000	0.00817212	0.00976547	0.0113189	1.26911	0.862757	1.19497	0	5063100	7272500	0	1131900000	729420000	840470000	0.0044731	0.00997025	0	0	∞	2.22894	0	0	0	5827000	754030000	964080000	609030000	0
Protein slowmo homolog 1		SLMO1	0	124540000	73706000	0	338360000	2492900000	2094200000	0.36807	0.0295664	0	0	∞	0.0803282	22586000	24451000	0	109270000	601680000	838260000	516410000	0.0406379	0	0.211595	0.923725	0	0	116160000	150230000	238540000	90840000	1131900000	729420000	840470000	0.132724	0.327027	0.108082	0.773214	3.02572	2.46397	0	0	0	8441500	754030000	964080000	609030000	0
Golgin subfamily A member 3		GOLGA3	0	0	17238000	48256000	338360000	2492900000	2094200000	0	0.00691484	0.0230427	0	0.300088	∞	0	0	0	0	601680000	838260000	516410000	0	0	0	0	0	0	0	23912000	38825000	0	1131900000	729420000	840470000	0.0211255	0.0532272	0	0	∞	2.51957	3334800	3199600	0	0	754030000	964080000	609030000	0.00424333
26S proteasome non-ATPase regulatory subunit 1		PSMD1	0	0	9773400	0	338360000	2492900000	2094200000	0	0.00392049	0	0	∞	∞	0	0	0	0	601680000	838260000	516410000	0	0	0	0	0	0	12359000	0	0	0	1131900000	729420000	840470000	0	0	0	∞	0	0	13585000	11578000	1074600	23708000	754030000	964080000	609030000	0.0153548
Transketolase		TKT	0	0	5958100	0	338360000	2492900000	2094200000	0	0.00239003	0	0	∞	∞	0	0	0	0	601680000	838260000	516410000	0	0	0	0	0	0	0	0	0	0	1131900000	729420000	840470000	0	0	0	0	0	0	0	0	0	0	754030000	964080000	609030000	0
40S ribosomal protein S8		RPS8	0	0	0	0	338360000	2492900000	2094200000	0	0	0	0	0	0	99502000	135430000	5089700	0	601680000	838260000	516410000	0.225086	0.00607174	0	0.734712	∞	0.0269752	79260000	34123000	11962000	11927000	1131900000	729420000	840470000	0.0301467	0.0163993	0.0141909	2.32277	1.15563	0.543985	0	0	0	0	754030000	964080000	609030000	0
Activated RNA polymerase II transcriptional coactivator p15		SUB1	0	1932400	0	0	338360000	2492900000	2094200000	0.00571108	0	0	0	0	0	0	0	0	0	601680000	838260000	516410000	0	0	0	0	0	0	0	0	0	0	1131900000	729420000	840470000	0	0	0	0	0	0	0	0	0	0	754030000	964080000	609030000	0
40S ribosomal protein S3		RPS3	0	0	0	0	338360000	2492900000	2094200000	0	0	0	0	0	0	0	4533900	0	0	601680000	838260000	516410000	0.0075354	0	0	0	0	0	0	0	0	0	1131900000	729420000	840470000	0	0	0	0	0	0	0	0	0	0	754030000	964080000	609030000	0
40S ribosomal protein S9		RPS9	0	0	0	0	338360000	2492900000	2094200000	0	0	0	0	0	0	0	44046000	0	0	601680000	838260000	516410000	0.073205	0	0	0	0	0	57691000	20560000	0	0	1131900000	729420000	840470000	0.0181641	0	0	2.80598	0	0	0	0	0	0	754030000	964080000	609030000	0
Melanoma-associated antigen B1		MAGEB1	0	0	22840000	0	338360000	2492900000	2094200000	0	0.00916202	0	0	∞	∞	6193700	0	78059	0	601680000	838260000	516410000	0	9.31203e-05	0	∞	∞	∞	4486400	3084000	7307500	5551500	1131900000	729420000	840470000	0.00272462	0.0100182	0.00660523	1.45473	1.51671	3.67693	3766600	1336000	0	3204900	754030000	964080000	609030000	0.00177181
Heterogeneous nuclear ribonucleoprotein M		HNRNPM	0	0	0	0	338360000	2492900000	2094200000	0	0	0	0	0	0	12165000	15518000	0	0	601680000	838260000	516410000	0.0257911	0	0	0.783928	0	0	4167400	6407800	0	0	1131900000	729420000	840470000	0.0056611	0	0	0.650364	0	0	0	0	0	0	754030000	964080000	609030000	0
Cytoskeleton-associated protein 5		CKAP5	0	0	0	5303800	338360000	2492900000	2094200000	0	0	0.00253261	0	0	0	0	0	0	0	601680000	838260000	516410000	0	0	0	0	0	0	0	0	0	0	1131900000	729420000	840470000	0	0	0	0	0	0	0	0	0	0	754030000	964080000	609030000	0
Cyclin-dependent kinase 1;Cyclin-dependent-like kinase 5;Cyclin-dependent kinase 2;Cyclin-dependent kinase 4;Cyclin-dependent kinase 3;Cyclin-dependent kinase 6;Cyclin-dependent kinase 9;Cyclin-dependent kinase 15;Cyclin-dependent kinase 14;Cyclin-dependent kinase 18;Cyclin-dependent kinase 16;Cyclin-dependent kinase 17;Cyclin-dependent kinase 12;Cyclin-dependent kinase 13		CDK1;CDK5;CDK2;CDK4;CDK3;CDK6;CDK9;CDK15;CDK14;CDK18;CDK16;CDK17;CDK12;CDK13	0	0	0	5307700	338360000	2492900000	2094200000	0	0	0.00253448	0	0	0	37831000	20525000	0	0	601680000	838260000	516410000	0.0341128	0	0	1.84317	0	0	20897000	7236100	5738000	0	1131900000	729420000	840470000	0.00639288	0.00786652	0	2.88788	∞	1.23051	0	0	0	0	754030000	964080000	609030000	0
Triosephosphate isomerase		TPI1	0	0	8588400	0	338360000	2492900000	2094200000	0	0.00344514	0	0	∞	∞	0	0	0	0	601680000	838260000	516410000	0	0	0	0	0	0	11086000	0	1523600	1721800	1131900000	729420000	840470000	0	0.00208878	0.00204862	∞	1.01961	∞	0	0	0	0	754030000	964080000	609030000	0
Protein S100-A9		S100A9	0	0	0	34829000	338360000	2492900000	2094200000	0	0	0.0166312	0	0	0	0	0	23317000	0	601680000	838260000	516410000	0	0.027816	0	0	∞	∞	0	0	0	0	1131900000	729420000	840470000	0	0	0	0	0	0	2050600	14863000	4781800	22316000	754030000	964080000	609030000	0.0197114
Phosphoglycerate mutase 2;Phosphoglycerate mutase 1;Probable phosphoglycerate mutase 4		PGAM2;PGAM1;PGAM4	0	0	10117000	0	338360000	2492900000	2094200000	0	0.00405833	0	0	∞	∞	0	0	0	0	601680000	838260000	516410000	0	0	0	0	0	0	8357700	0	0	0	1131900000	729420000	840470000	0	0	0	∞	0	0	0	0	0	8973700	754030000	964080000	609030000	0
Tropomyosin alpha-1 chain		TPM1	4100400	0	0	0	338360000	2492900000	2094200000	0	0	0	∞	0	0	120490000	103560000	27115000	4925900	601680000	838260000	516410000	0.172118	0.0323468	0.00953874	1.16348	3.39109	0.187934	96451000	43134000	54170000	36361000	1131900000	729420000	840470000	0.0381076	0.0742645	0.0432627	2.23608	1.71659	1.94881	0	0	0	0	754030000	964080000	609030000	0
Peroxiredoxin-2		PRDX2	9848300	0	8556200	0	338360000	2492900000	2094200000	0	0.00343223	0	∞	∞	∞	13393000	0	0	0	601680000	838260000	516410000	0	0	0	∞	0	0	14321000	0	0	0	1131900000	729420000	840470000	0	0	0	∞	0	0	0	0	5728600	8461000	754030000	964080000	609030000	0
Mitogen-activated protein kinase kinase kinase 7		MAP3K7	0	363860	16807000	2146300	338360000	2492900000	2094200000	0.00107536	0.00674195	0.00102488	0	6.57829	6.26946	0	0	0	0	601680000	838260000	516410000	0	0	0	0	0	0	54274000	4779500	15488000	2127300	1131900000	729420000	840470000	0.00422255	0.0212333	0.00253108	11.3556	8.38902	5.02856	10428000	4576100	9518500	5562800	754030000	964080000	609030000	0.00606886
40S ribosomal protein S23		RPS23	20469000	0	0	11868000	338360000	2492900000	2094200000	0	0	0.00566708	∞	0	0	16254000	39753000	0	0	601680000	838260000	516410000	0.06607	0	0	0.408875	0	0	0	0	0	0	1131900000	729420000	840470000	0	0	0	0	0	0	0	10750000	6305300	6133800	754030000	964080000	609030000	0.0142567
Ras GTPase-activating protein-binding protein 2		G3BP2	1892000	0	0	0	338360000	2492900000	2094200000	0	0	0	∞	0	0	0	10322000	0	0	601680000	838260000	516410000	0.0171553	0	0	0	0	0	16372000	0	0	0	1131900000	729420000	840470000	0	0	0	∞	0	0	914400	1170200	1762800	0	754030000	964080000	609030000	0.00155193
Phosphatidylinositol-binding clathrin assembly protein		PICALM	0	0	7047200	2377900	338360000	2492900000	2094200000	0	0.00282691	0.00113547	0	2.48964	∞	189580000	190710000	4891700	9445000	601680000	838260000	516410000	0.316963	0.00583554	0.0182897	0.994075	0.319061	0.0184108	58668000	0	0	0	1131900000	729420000	840470000	0	0	0	∞	0	0	1244300	0	0	0	754030000	964080000	609030000	0
Ras GTPase-activating-like protein IQGAP1		IQGAP1	0	3833500	12092000	0	338360000	2492900000	2094200000	0.0113296	0.00485058	0	0	∞	0.428131	375400000	768350000	0	0	601680000	838260000	516410000	1.27701	0	0	0.488579	0	0	77424000	0	0	9326300	1131900000	729420000	840470000	0	0	0.0110965	∞	0	0	2854700	3005500	0	0	754030000	964080000	609030000	0.00398592
Polymerase I and transcript release factor		PTRF	0	0	13623000	0	338360000	2492900000	2094200000	0	0.00546472	0	0	∞	∞	0	9381100	0	0	601680000	838260000	516410000	0.0155915	0	0	0	0	0	0	0	0	0	1131900000	729420000	840470000	0	0	0	0	0	0	726030	526060	6478400	10197000	754030000	964080000	609030000	0.000697665
26S proteasome non-ATPase regulatory subunit 3		PSMD3	6357100	406740	0	5100700	338360000	2492900000	2094200000	0.00120209	0	0.00243563	15.6294	0	0	0	0	0	0	601680000	838260000	516410000	0	0	0	0	0	0	0	0	9322500	0	1131900000	729420000	840470000	0	0.0127807	0	0	∞	∞	14528000	0	14692000	11338000	754030000	964080000	609030000	0
HLA class I histocompatibility antigen, Cw-7 alpha chain;HLA class I histocompatibility antigen, B-73 alpha chain;HLA class I histocompatibility antigen, Cw-17 alpha chain		HLA-C;HLA-B	0	16852000	0	131560000	338360000	2492900000	2094200000	0.0498049	0	0.0628211	0	0	0	61154000	23883000	4060100	1104800	601680000	838260000	516410000	0.0396939	0.00484349	0.00213939	2.56057	2.26396	0.122021	22050000	10885000	355190000	268430000	1131900000	729420000	840470000	0.00961657	0.486949	0.319381	2.02572	1.52466	50.6364	0	0	0	0	754030000	964080000	609030000	0
Metastasis-associated protein MTA2;Metastasis-associated protein MTA3;Metastasis-associated protein MTA1		MTA2;MTA3;MTA1	21962000	0	43132000	25981000	338360000	2492900000	2094200000	0	0.0173019	0.0124062	∞	1.39462	∞	17496000	0	0	0	601680000	838260000	516410000	0	0	0	∞	0	0	19450000	0	0	0	1131900000	729420000	840470000	0	0	0	∞	0	0	0	5761300	8247000	0	754030000	964080000	609030000	0.00764068
Tropomyosin alpha-3 chain		TPM3	48286000	7490400	59902000	8152500	338360000	2492900000	2094200000	0.0221374	0.024029	0.00389289	6.44638	6.17254	1.08545	402750000	485620000	0	0	601680000	838260000	516410000	0.807107	0	0	0.829352	0	0	206030000	43089000	0	1567100	1131900000	729420000	840470000	0.0380679	0	0.00186455	4.7815	0	0	0	3827600	1512100	1740900	754030000	964080000	609030000	0.00507619
60S ribosomal protein L7		RPL7	51434000	353920	29887000	47362000	338360000	2492900000	2094200000	0.00104599	0.0119888	0.0226158	145.327	0.53011	11.4618	333060000	495430000	12277000	24039000	601680000	838260000	516410000	0.823411	0.0146458	0.0465502	0.672264	0.314624	0.0177868	190820000	97247000	11363000	1824200	1131900000	729420000	840470000	0.0859148	0.0155781	0.00217045	1.96222	7.17737	0.181321	3425200	9219100	11685000	0	754030000	964080000	609030000	0.0122264
Glutathione S-transferase omega-1		GSTO1	0	0	11967000	0	338360000	2492900000	2094200000	0	0.00480043	0	0	∞	∞	0	0	0	0	601680000	838260000	516410000	0	0	0	0	0	0	34248000	15339000	72193000	128240000	1131900000	729420000	840470000	0.0135516	0.0989732	0.152581	2.23274	0.648659	7.30346	0	3718900	0	44427000	754030000	964080000	609030000	0.00493203
Glutaminyl-peptide cyclotransferase-like protein		QPCTL	3031300	949210	9974200	6260100	338360000	2492900000	2094200000	0.00280533	0.00400104	0.00298926	3.1935	1.33847	1.42623	0	17030000	0	0	601680000	838260000	516410000	0.0283041	0	0	0	0	0	0	9774400	0	0	1131900000	729420000	840470000	0.00863539	0	0	0	0	0	0	11817000	10271000	0	754030000	964080000	609030000	0.0156718
Retinoic acid-induced protein 3		GPRC5A	0	0	0	0	338360000	2492900000	2094200000	0	0	0	0	0	0	49995000	122510000	0	0	601680000	838260000	516410000	0.203613	0	0	0.408089	0	0	0	0	0	0	1131900000	729420000	840470000	0	0	0	0	0	0	0	12845000	12189000	0	754030000	964080000	609030000	0.0170351
Ig kappa chain V-III region NG9			0	0	0	0	338360000	2492900000	2094200000	0	0	0	0	0	0	0	0	24775000	11326000	601680000	838260000	516410000	0	0.0295553	0.0219322	0	1.34758	∞	0	0	0	0	1131900000	729420000	840470000	0	0	0	0	0	0	8281100	6001300	0	13984000	754030000	964080000	609030000	0.00795897
TGF-beta-activated kinase 1 and MAP3K7-binding protein 1		TAB1	0	786670	14597000	0	338360000	2492900000	2094200000	0.00232495	0.00585543	0	0	∞	2.51852	18827000	0	25176000	0	601680000	838260000	516410000	0	0.0300336	0	∞	∞	∞	60131000	11420000	0	8414100	1131900000	729420000	840470000	0.0100892	0	0.0100112	5.26541	0	0	18110000	12456000	17985000	11755000	754030000	964080000	609030000	0.0165192
26S protease regulatory subunit 7		PSMC2	0	0	9298400	13053000	338360000	2492900000	2094200000	0	0.00372995	0.00623293	0	0.598427	∞	0	0	10916000	0	601680000	838260000	516410000	0	0.0130222	0	0	∞	∞	0	0	0	0	1131900000	729420000	840470000	0	0	0	0	0	0	31130000	10216000	0	0	754030000	964080000	609030000	0.0135485
Nucleosome assembly protein 1-like 1		NAP1L1	9784600	0	49781000	11092000	338360000	2492900000	2094200000	0	0.0199691	0.00529653	∞	3.77022	∞	42874000	70818000	0	0	601680000	838260000	516410000	0.1177	0	0	0.605411	0	0	40517000	32127000	18310000	3252400	1131900000	729420000	840470000	0.0283832	0.0251021	0.00386974	1.26115	6.48678	0.8844	45118000	11959000	34781000	0	754030000	964080000	609030000	0.0158601
Monocarboxylate transporter 4		SLC16A3	0	0	5652600	3381900	338360000	2492900000	2094200000	0	0.00226748	0.00161489	0	1.40411	∞	0	0	0	0	601680000	838260000	516410000	0	0	0	0	0	0	0	2594200	0	0	1131900000	729420000	840470000	0.0022919	0	0	0	0	0	961180	0	3881300	7533000	754030000	964080000	609030000	0
Ig kappa chain V-I region Lay;Ig kappa chain V-III region POM;Ig kappa chain V-III region VH;Ig kappa chain V-III region CLL			18855000	3010100	12309000	48657000	338360000	2492900000	2094200000	0.00889615	0.00493762	0.0232342	6.26391	0.212516	0.555029	43341000	12487000	0	0	601680000	838260000	516410000	0.0207536	0	0	3.47089	0	0	32073000	16428000	50312000	53866000	1131900000	729420000	840470000	0.0145136	0.0689754	0.0640903	1.95234	1.07622	4.75245	0	0	0	0	754030000	964080000	609030000	0
Unconventional myosin-Ib		MYO1B	769570000	92149000	87400000	136900000	338360000	2492900000	2094200000	0.27234	0.0350596	0.065371	8.35137	0.536317	0.128735	3010800000	3168900000	0	8120000	601680000	838260000	516410000	5.26675	0	0.0157239	0.950109	0	0	1080100000	489930000	7171100	7349400	1131900000	729420000	840470000	0.432839	0.00983124	0.00874439	2.2046	1.12429	0.0227134	88950000	68402000	416070000	15059000	754030000	964080000	609030000	0.0907152
Ig gamma-2 chain C region		IGHG2	1510300000	131630000	1165900000	81723000	338360000	2492900000	2094200000	0.389024	0.467688	0.0390235	11.4738	11.9848	1.20221	78610000	74928000	1677100	48423000	601680000	838260000	516410000	0.124531	0.00200069	0.0937685	1.04914	0.0213365	0.0160658	0	100490000	275810000	575910000	1131900000	729420000	840470000	0.0887799	0.378122	0.685224	0	0.551823	4.2591	216150000	103890000	103200000	2498500	754030000	964080000	609030000	0.13778
T-complex protein 1 subunit delta		CCT4	0	1307000	59776000	68073000	338360000	2492900000	2094200000	0.00386275	0.0239785	0.0325055	0	0.737675	6.20762	82935000	27664000	6619500	0	601680000	838260000	516410000	0.0459779	0.00789671	0	2.99794	∞	0.17175	47618000	41963000	17150000	11842000	1131900000	729420000	840470000	0.0370731	0.0235118	0.0140897	1.13476	1.66872	0.634203	0	11161000	57070000	38120000	754030000	964080000	609030000	0.0148018
Proteasomal ubiquitin receptor ADRM1		ADRM1	0	0	0	0	338360000	2492900000	2094200000	0	0	0	0	0	0	0	0	0	0	601680000	838260000	516410000	0	0	0	0	0	0	3969700	0	0	0	1131900000	729420000	840470000	0	0	0	∞	0	0	0	0	1137600	0	754030000	964080000	609030000	0
Apolipoprotein A-I;Proapolipoprotein A-I;Truncated apolipoprotein A-I		APOA1	0	0	0	0	338360000	2492900000	2094200000	0	0	0	0	0	0	0	0	0	0	601680000	838260000	516410000	0	0	0	0	0	0	0	0	0	0	1131900000	729420000	840470000	0	0	0	0	0	0	0	0	1387300	0	754030000	964080000	609030000	0
60S ribosomal protein L17		RPL17	0	0	0	0	338360000	2492900000	2094200000	0	0	0	0	0	0	29076000	46898000	2933700	0	601680000	838260000	516410000	0.0779451	0.00349975	0	0.619984	∞	0.0449002	14404000	7802200	0	0	1131900000	729420000	840470000	0.00689301	0	0	1.84615	0	0	0	0	5013600	0	754030000	964080000	609030000	0
Nucleophosmin		NPM1	0	1302600	0	0	338360000	2492900000	2094200000	0.00384975	0	0	0	0	0	0	0	0	0	601680000	838260000	516410000	0	0	0	0	0	0	0	0	0	0	1131900000	729420000	840470000	0	0	0	0	0	0	0	0	7879500	0	754030000	964080000	609030000	0
Target of Myb protein 1		TOM1	5364000	0	0	0	338360000	2492900000	2094200000	0	0	0	∞	0	0	154010000	143390000	0	0	601680000	838260000	516410000	0.238316	0	0	1.07406	0	0	78499000	23674000	0	0	1131900000	729420000	840470000	0.0209153	0	0	3.31583	0	0	0	0	7935800	0	754030000	964080000	609030000	0
LIM domain and actin-binding protein 1		LIMA1	86758000	4249000	11793000	16845000	338360000	2492900000	2094200000	0.0125576	0.00473064	0.00804364	20.4185	0.588121	0.376714	1255400000	780630000	0	0	601680000	838260000	516410000	1.29742	0	0	1.60819	0	0	490500000	55347000	0	4854800	1131900000	729420000	840470000	0.0488974	0	0.00577629	8.86227	0	0	0	0	13043000	0	754030000	964080000	609030000	0
60S ribosomal protein L23		RPL23	72240000	0	27756000	22186000	338360000	2492900000	2094200000	0	0.011134	0.010594	∞	1.05097	∞	36821000	79007000	1540000	729620	601680000	838260000	516410000	0.131311	0.00183714	0.00141287	0.466047	1.30029	0.0139908	39854000	25312000	0	0	1131900000	729420000	840470000	0.0223624	0	0	1.57451	0	0	0	0	2214500	0	754030000	964080000	609030000	0
Toll-interacting protein		TOLLIP	21461000	0	0	0	338360000	2492900000	2094200000	0	0	0	∞	0	0	111380000	94733000	0	0	601680000	838260000	516410000	0.157447	0	0	1.17573	0	0	42056000	0	0	0	1131900000	729420000	840470000	0	0	0	∞	0	0	0	0	6708500	0	754030000	964080000	609030000	0
L-lactate dehydrogenase B chain		LDHB	0	0	0	0	338360000	2492900000	2094200000	0	0	0	0	0	0	0	0	0	0	601680000	838260000	516410000	0	0	0	0	0	0	6499600	0	0	0	1131900000	729420000	840470000	0	0	0	∞	0	0	282720	749200	4400600	949510	754030000	964080000	609030000	0.000993594
Neurabin-2;Neurabin-1		PPP1R9B;PPP1R9A	0	0	0	0	338360000	2492900000	2094200000	0	0	0	0	0	0	33480000	8623600	0	0	601680000	838260000	516410000	0.0143325	0	0	3.88237	0	0	0	0	0	0	1131900000	729420000	840470000	0	0	0	0	0	0	0	0	1924900	0	754030000	964080000	609030000	0
Phosphoglycerate kinase 1		PGK1	0	0	0	0	338360000	2492900000	2094200000	0	0	0	0	0	0	0	11058000	0	0	601680000	838260000	516410000	0.0183785	0	0	0	0	0	17218000	0	0	0	1131900000	729420000	840470000	0	0	0	∞	0	0	0	0	11712000	0	754030000	964080000	609030000	0
Protein unc-45 homolog A		UNC45A	71394000	12931000	20081000	16878000	338360000	2492900000	2094200000	0.0382167	0.00805528	0.0080594	5.52115	0.999488	0.210779	905930000	817830000	5939600	4707200	601680000	838260000	516410000	1.35924	0.00708563	0.00911524	1.10772	0.777339	0.00521292	276210000	58426000	4489300	5819800	1131900000	729420000	840470000	0.0516176	0.00615462	0.00692446	4.72752	0.888823	0.119235	7702800	11645000	47961000	5776800	754030000	964080000	609030000	0.0154437
Heat shock protein HSP 90-beta		HSP90AB1	8097500	2246200	6061500	0	338360000	2492900000	2094200000	0.00663849	0.00243151	0	3.60498	∞	0.366274	63518000	53262000	0	4733100	601680000	838260000	516410000	0.0885221	0	0.00916539	1.19256	0	0	99194000	21266000	7393900	0	1131900000	729420000	840470000	0.0187879	0.0101367	0	4.66444	∞	0.539533	0	0	22019000	2407200	754030000	964080000	609030000	0
Myosin phosphatase Rho-interacting protein		MPRIP	142130000	11281000	34671000	60295000	338360000	2492900000	2094200000	0.0333402	0.0139079	0.0287914	12.5991	0.483057	0.417151	2851500000	1310600000	47042000	59087000	601680000	838260000	516410000	2.17823	0.0561186	0.114419	2.17572	0.490467	0.0257634	938790000	113720000	6736600	0	1131900000	729420000	840470000	0.100468	0.00923556	0	8.25528	∞	0.0919251	0	387310	6518400	664030	754030000	964080000	609030000	0.000513653
60 kDa heat shock protein, mitochondrial		HSPD1	12942000	437310	10647000	0	338360000	2492900000	2094200000	0.00129244	0.00427093	0	29.5946	∞	3.30455	6600200	12082000	0	0	601680000	838260000	516410000	0.0200804	0	0	0.546284	0	0	41489000	7803700	1598700	2411300	1131900000	729420000	840470000	0.00689434	0.00219174	0.00286899	5.31658	0.763942	0.317905	0	6486000	25790000	13598000	754030000	964080000	609030000	0.00860178
40S ribosomal protein S20		RPS20	0	0	0	0	338360000	2492900000	2094200000	0	0	0	0	0	0	0	0	0	5548700	601680000	838260000	516410000	0	0	0.0107448	0	0	0	0	0	0	0	1131900000	729420000	840470000	0	0	0	0	0	0	0	0	7830900	0	754030000	964080000	609030000	0
T-complex protein 1 subunit epsilon		CCT5	56831000	1216600	92937000	89310000	338360000	2492900000	2094200000	0.00359558	0.0372807	0.0426464	46.713	0.874182	10.3685	127890000	87015000	67980000	35409000	601680000	838260000	516410000	0.14462	0.0810966	0.0685676	1.46975	1.18272	0.560756	54637000	5341600	26412000	22003000	1131900000	729420000	840470000	0.00471914	0.0362096	0.0261794	10.2286	1.38313	7.67291	0	80336000	324210000	173220000	754030000	964080000	609030000	0.106542
Isocitrate dehydrogenase [NADP] cytoplasmic		IDH1	0	0	0	0	338360000	2492900000	2094200000	0	0	0	0	0	0	0	0	0	5722500	601680000	838260000	516410000	0	0	0.0110813	0	0	0	5006700	8914900	9524200	0	1131900000	729420000	840470000	0.00787605	0.0130572	0	0.56161	∞	1.65784	0	0	0	0	754030000	964080000	609030000	0
GRIP1-associated protein 1		GRIPAP1	0	0	0	0	338360000	2492900000	2094200000	0	0	0	0	0	0	0	0	0	0	601680000	838260000	516410000	0	0	0	0	0	0	0	0	0	0	1131900000	729420000	840470000	0	0	0	0	0	0	0	0	0	0	754030000	964080000	609030000	0
Proteasome subunit alpha type-4		PSMA4	0	1104100	16192000	0	338360000	2492900000	2094200000	0.00326309	0.00649525	0	0	∞	1.99052	0	0	0	0	601680000	838260000	516410000	0	0	0	0	0	0	55738000	0	0	26444000	1131900000	729420000	840470000	0	0	0.0314633	∞	0	0	0	10978000	10371000	0	754030000	964080000	609030000	0.0145591
Endonuclease domain-containing 1 protein		ENDOD1	0	0	0	5231300	338360000	2492900000	2094200000	0	0	0.00249799	0	0	0	0	0	0	0	601680000	838260000	516410000	0	0	0	0	0	0	0	0	0	0	1131900000	729420000	840470000	0	0	0	0	0	0	0	7854500	8596100	0	754030000	964080000	609030000	0.0104167
Peroxiredoxin-1		PRDX1	0	16588000	90022000	220900000	338360000	2492900000	2094200000	0.0490247	0.0361114	0.105482	0	0.342347	0.736595	365020000	164780000	31636000	1320000	601680000	838260000	516410000	0.273867	0.0377401	0.00255611	2.2152	14.7647	0.137805	203100000	182720000	19330000	27944000	1131900000	729420000	840470000	0.161428	0.0265005	0.0332481	1.11154	0.797054	0.164163	15398000	42151000	3139200	4033800	754030000	964080000	609030000	0.055901
Acyl-coenzyme A thioesterase 9, mitochondrial		ACOT9	0	0	0	0	338360000	2492900000	2094200000	0	0	0	0	0	0	0	0	0	0	601680000	838260000	516410000	0	0	0	0	0	0	0	0	0	0	1131900000	729420000	840470000	0	0	0	0	0	0	585630	769280	1555800	365930	754030000	964080000	609030000	0.00102022
Gelsolin		GSN	1429500000	501490000	208890000	360770000	338360000	2492900000	2094200000	1.48212	0.083794	0.172271	2.85051	0.486408	0.0565366	8818300000	7664900000	64746000	13824000	601680000	838260000	516410000	12.7392	0.0772386	0.0267694	1.15048	2.88533	0.00606308	4111200000	1229400000	12754000	36391000	1131900000	729420000	840470000	1.08614	0.0174851	0.0432984	3.34407	0.403829	0.0160984	0	188310000	387090000	68631000	754030000	964080000	609030000	0.249738
Actin, cytoplasmic 2;Actin, cytoplasmic 2, N-terminally processed		ACTG1	101440000000	24301000000	16788000000	14765000000	338360000	2492900000	2094200000	71.82	6.73433	7.05042	4.17431	0.955166	0.0937668	204450000000	188750000000	2863200000	2401100000	601680000	838260000	516410000	313.705	3.41565	4.6496	1.08318	0.734611	0.0108881	154000000000	59771000000	995120000	1144700000	1131900000	729420000	840470000	52.8059	1.36426	1.36198	2.5765	1.00168	0.0258354	883060000	6906100000	13814000000	3478000000	754030000	964080000	609030000	9.15892
Tripartite motif-containing protein 38		TRIM38	0	4049200	43393000	0	338360000	2492900000	2094200000	0.0119671	0.0174066	0	0	∞	1.45454	0	0	25655000	16727000	601680000	838260000	516410000	0	0.0306051	0.0323909	0	0.944865	∞	33263000	0	0	0	1131900000	729420000	840470000	0	0	0	∞	0	0	0	0	0	0	754030000	964080000	609030000	0
L-lactate dehydrogenase A chain		LDHA	0	1635900	15996000	0	338360000	2492900000	2094200000	0.00483479	0.00641662	0	0	∞	1.32718	13762000	14637000	0	0	601680000	838260000	516410000	0.0243269	0	0	0.94022	0	0	126330000	35529000	0	0	1131900000	729420000	840470000	0.0313888	0	0	3.55569	0	0	6048700	5955300	12778000	19353000	754030000	964080000	609030000	0.00789796
Putative pre-mRNA-splicing factor ATP-dependent RNA helicase DHX15		DHX15	0	0	0	0	338360000	2492900000	2094200000	0	0	0	0	0	0	0	0	0	0	601680000	838260000	516410000	0	0	0	0	0	0	0	5552100	4760300	0	1131900000	729420000	840470000	0.00490512	0.00652614	0	0	∞	1.33048	9443800	5915500	0	6952800	754030000	964080000	609030000	0.00784518
Poly(rC)-binding protein 1		PCBP1	0	1643900	18042000	0	338360000	2492900000	2094200000	0.00485843	0.00723735	0	0	∞	1.48965	37352000	25693000	8978500	4890100	601680000	838260000	516410000	0.0427021	0.0107109	0.00946941	1.45378	1.1311	0.250828	15208000	14763000	0	0	1131900000	729420000	840470000	0.0130427	0	0	1.03014	0	0	16849000	0	10732000	8615000	754030000	964080000	609030000	0
26S protease regulatory subunit 4		PSMC1	0	0	0	14355000	338360000	2492900000	2094200000	0	0	0.00685465	0	0	0	0	0	0	0	601680000	838260000	516410000	0	0	0	0	0	0	0	0	0	0	1131900000	729420000	840470000	0	0	0	0	0	0	12920000	0	12469000	0	754030000	964080000	609030000	0
Dedicator of cytokinesis protein 7		DOCK7	0	0	0	0	338360000	2492900000	2094200000	0	0	0	0	0	0	22718000	64970000	0	0	601680000	838260000	516410000	0.107981	0	0	0.349669	0	0	6804600	0	0	0	1131900000	729420000	840470000	0	0	0	∞	0	0	0	5809500	9221900	0	754030000	964080000	609030000	0.0077046
60S ribosomal protein L4		RPL4	3892600	0	0	3295000	338360000	2492900000	2094200000	0	0	0.00157339	∞	0	0	276500000	287490000	0	5374700	601680000	838260000	516410000	0.477812	0	0.0104078	0.961773	0	0	59222000	58890000	2075500	0	1131900000	729420000	840470000	0.0520276	0.00284541	0	1.00564	∞	0.0546905	0	6184000	9687500	0	754030000	964080000	609030000	0.00820127
Unconventional myosin-Ie		MYO1E	241100000	33874000	46677000	34120000	338360000	2492900000	2094200000	0.100112	0.018724	0.0162926	7.11755	1.14923	0.18703	1126000000	887610000	0	11379000	601680000	838260000	516410000	1.47522	0	0.0220348	1.26858	0	0	483490000	113340000	0	0	1131900000	729420000	840470000	0.100133	0	0	4.26584	0	0	0	140590000	255600000	40661000	754030000	964080000	609030000	0.186451
Unconventional myosin-Ic		MYO1C	5435500000	1111600000	926180000	834180000	338360000	2492900000	2094200000	3.28526	0.371527	0.398329	4.8898	0.932715	0.113089	22339000000	21376000000	371650000	238160000	601680000	838260000	516410000	35.5272	0.443359	0.461184	1.04505	0.961349	0.0124794	9060000000	3886700000	105920000	70509000	1131900000	729420000	840470000	3.43378	0.145211	0.0838923	2.33103	1.73092	0.042289	141780000	2044000000	3566900000	552260000	754030000	964080000	609030000	2.71077
Tubulin beta-4A chain		TUBB4A	0	0	0	0	338360000	2492900000	2094200000	0	0	0	0	0	0	0	0	0	0	601680000	838260000	516410000	0	0	0	0	0	0	0	0	0	0	1131900000	729420000	840470000	0	0	0	0	0	0	0	0	0	0	754030000	964080000	609030000	0
Dolichyl-diphosphooligosaccharide--protein glycosyltransferase subunit 2		RPN2	0	0	0	0	338360000	2492900000	2094200000	0	0	0	0	0	0	0	0	0	0	601680000	838260000	516410000	0	0	0	0	0	0	0	0	0	0	1131900000	729420000	840470000	0	0	0	0	0	0	0	0	0	0	754030000	964080000	609030000	0
Glutathione S-transferase Mu 3		GSTM3	0	0	0	0	338360000	2492900000	2094200000	0	0	0	0	0	0	0	0	0	0	601680000	838260000	516410000	0	0	0	0	0	0	0	0	0	0	1131900000	729420000	840470000	0	0	0	0	0	0	0	0	0	0	754030000	964080000	609030000	0
Protein disulfide-isomerase A3		PDIA3	0	0	0	0	338360000	2492900000	2094200000	0	0	0	0	0	0	0	0	0	0	601680000	838260000	516410000	0	0	0	0	0	0	0	0	0	0	1131900000	729420000	840470000	0	0	0	0	0	0	0	0	0	0	754030000	964080000	609030000	0
60S ribosomal protein L27a		RPL27A	0	0	0	0	338360000	2492900000	2094200000	0	0	0	0	0	0	0	0	0	0	601680000	838260000	516410000	0	0	0	0	0	0	0	0	0	0	1131900000	729420000	840470000	0	0	0	0	0	0	0	0	0	0	754030000	964080000	609030000	0
ADP-ribosylation factor 5;ADP-ribosylation factor 1;ADP-ribosylation factor 3		ARF5;ARF1;ARF3	0	0	0	0	338360000	2492900000	2094200000	0	0	0	0	0	0	0	0	0	0	601680000	838260000	516410000	0	0	0	0	0	0	0	0	0	0	1131900000	729420000	840470000	0	0	0	0	0	0	0	0	0	0	754030000	964080000	609030000	0
40S ribosomal protein S13		RPS13	0	0	0	0	338360000	2492900000	2094200000	0	0	0	0	0	0	0	0	0	0	601680000	838260000	516410000	0	0	0	0	0	0	0	0	0	0	1131900000	729420000	840470000	0	0	0	0	0	0	0	0	0	0	754030000	964080000	609030000	0
Baculoviral IAP repeat-containing protein 2		BIRC2	0	0	0	0	338360000	2492900000	2094200000	0	0	0	0	0	0	0	0	0	0	601680000	838260000	516410000	0	0	0	0	0	0	0	0	0	0	1131900000	729420000	840470000	0	0	0	0	0	0	0	0	0	0	754030000	964080000	609030000	0
Laminin subunit beta-3		LAMB3	0	0	0	0	338360000	2492900000	2094200000	0	0	0	0	0	0	0	0	0	0	601680000	838260000	516410000	0	0	0	0	0	0	0	0	0	0	1131900000	729420000	840470000	0	0	0	0	0	0	0	0	0	0	754030000	964080000	609030000	0
Caprin-1		CAPRIN1	0	0	0	0	338360000	2492900000	2094200000	0	0	0	0	0	0	0	0	0	0	601680000	838260000	516410000	0	0	0	0	0	0	0	0	0	0	1131900000	729420000	840470000	0	0	0	0	0	0	0	0	0	0	754030000	964080000	609030000	0
Plectin		PLEC	0	0	0	0	338360000	2492900000	2094200000	0	0	0	0	0	0	0	0	0	0	601680000	838260000	516410000	0	0	0	0	0	0	0	0	0	0	1131900000	729420000	840470000	0	0	0	0	0	0	0	0	0	0	754030000	964080000	609030000	0
Girdin		CCDC88A	0	0	0	0	338360000	2492900000	2094200000	0	0	0	0	0	0	0	0	0	0	601680000	838260000	516410000	0	0	0	0	0	0	0	0	0	0	1131900000	729420000	840470000	0	0	0	0	0	0	0	0	0	0	754030000	964080000	609030000	0
DCC-interacting protein 13-beta		APPL2	0	0	0	0	338360000	2492900000	2094200000	0	0	0	0	0	0	0	0	0	0	601680000	838260000	516410000	0	0	0	0	0	0	0	0	0	0	1131900000	729420000	840470000	0	0	0	0	0	0	0	0	0	0	754030000	964080000	609030000	0
Exosome complex component RRP43		EXOSC8	0	0	0	0	338360000	2492900000	2094200000	0	0	0	0	0	0	0	0	0	0	601680000	838260000	516410000	0	0	0	0	0	0	0	0	0	0	1131900000	729420000	840470000	0	0	0	0	0	0	0	0	0	0	754030000	964080000	609030000	0
3-hydroxyacyl-CoA dehydrogenase type-2		HSD17B10	0	0	0	0	338360000	2492900000	2094200000	0	0	0	0	0	0	0	0	0	0	601680000	838260000	516410000	0	0	0	0	0	0	0	0	0	0	1131900000	729420000	840470000	0	0	0	0	0	0	0	0	0	0	754030000	964080000	609030000	0
Protein LSM14 homolog B		LSM14B	0	0	0	0	338360000	2492900000	2094200000	0	0	0	0	0	0	0	0	0	0	601680000	838260000	516410000	0	0	0	0	0	0	0	0	0	0	1131900000	729420000	840470000	0	0	0	0	0	0	0	0	0	0	754030000	964080000	609030000	0
E3 ubiquitin-protein ligase Praja-2		PJA2	0	0	0	0	338360000	2492900000	2094200000	0	0	0	0	0	0	1546100	0	0	0	601680000	838260000	516410000	0	0	0	∞	0	0	0	0	0	0	1131900000	729420000	840470000	0	0	0	0	0	0	0	0	0	0	754030000	964080000	609030000	0
Tropomodulin-2		TMOD2	0	0	0	0	338360000	2492900000	2094200000	0	0	0	0	0	0	18157000	0	0	0	601680000	838260000	516410000	0	0	0	∞	0	0	0	0	0	0	1131900000	729420000	840470000	0	0	0	0	0	0	0	0	0	0	754030000	964080000	609030000	0
Centrosomal protein of 290 kDa		CEP290	0	0	0	0	338360000	2492900000	2094200000	0	0	0	0	0	0	0	0	0	0	601680000	838260000	516410000	0	0	0	0	0	0	0	0	0	0	1131900000	729420000	840470000	0	0	0	0	0	0	0	0	0	0	754030000	964080000	609030000	0
POTE ankyrin domain family member J		POTEJ	0	0	0	0	338360000	2492900000	2094200000	0	0	0	0	0	0	14285000	0	0	0	601680000	838260000	516410000	0	0	0	∞	0	0	0	0	0	0	1131900000	729420000	840470000	0	0	0	0	0	0	0	0	0	0	754030000	964080000	609030000	0
BMP-2-inducible protein kinase		BMP2K	0	0	0	0	338360000	2492900000	2094200000	0	0	0	0	0	0	21058000	0	0	0	601680000	838260000	516410000	0	0	0	∞	0	0	13744000	0	0	0	1131900000	729420000	840470000	0	0	0	∞	0	0	0	0	0	0	754030000	964080000	609030000	0
ATP-dependent 6-phosphofructokinase, platelet type;ATP-dependent 6-phosphofructokinase, liver type		PFKP;PFKL	0	0	0	0	338360000	2492900000	2094200000	0	0	0	0	0	0	0	0	0	0	601680000	838260000	516410000	0	0	0	0	0	0	17757000	0	0	0	1131900000	729420000	840470000	0	0	0	∞	0	0	0	0	0	0	754030000	964080000	609030000	0
Caldesmon		CALD1	0	0	0	0	338360000	2492900000	2094200000	0	0	0	0	0	0	0	0	0	0	601680000	838260000	516410000	0	0	0	0	0	0	18323000	0	0	0	1131900000	729420000	840470000	0	0	0	∞	0	0	0	0	0	0	754030000	964080000	609030000	0
Zyxin		ZYX	0	0	0	0	338360000	2492900000	2094200000	0	0	0	0	0	0	0	0	0	0	601680000	838260000	516410000	0	0	0	0	0	0	0	0	0	0	1131900000	729420000	840470000	0	0	0	0	0	0	1465500	0	0	0	754030000	964080000	609030000	0
26S proteasome non-ATPase regulatory subunit 7		PSMD7	0	0	0	0	338360000	2492900000	2094200000	0	0	0	0	0	0	0	0	0	0	601680000	838260000	516410000	0	0	0	0	0	0	0	0	0	0	1131900000	729420000	840470000	0	0	0	0	0	0	4060800	0	0	0	754030000	964080000	609030000	0
Transcription factor E2F7		E2F7	0	0	0	0	338360000	2492900000	2094200000	0	0	0	0	0	0	0	0	0	0	601680000	838260000	516410000	0	0	0	0	0	0	0	0	0	0	1131900000	729420000	840470000	0	0	0	0	0	0	11708000	0	0	0	754030000	964080000	609030000	0
Non-POU domain-containing octamer-binding protein		NONO	0	0	0	0	338360000	2492900000	2094200000	0	0	0	0	0	0	0	0	0	0	601680000	838260000	516410000	0	0	0	0	0	0	0	0	0	0	1131900000	729420000	840470000	0	0	0	0	0	0	17072000	0	0	0	754030000	964080000	609030000	0
Rho GTPase-activating protein 22		ARHGAP22	0	0	0	0	338360000	2492900000	2094200000	0	0	0	0	0	0	0	0	0	0	601680000	838260000	516410000	0	0	0	0	0	0	0	0	0	0	1131900000	729420000	840470000	0	0	0	0	0	0	6899100	0	0	0	754030000	964080000	609030000	0
Electron transfer flavoprotein subunit alpha, mitochondrial		ETFA	0	0	0	9508500	338360000	2492900000	2094200000	0	0	0.0045404	0	0	0	24595000	0	0	0	601680000	838260000	516410000	0	0	0	∞	0	0	0	0	0	0	1131900000	729420000	840470000	0	0	0	0	0	0	0	0	0	0	754030000	964080000	609030000	0
60S ribosomal protein L28		RPL28	1688500	176770	0	0	338360000	2492900000	2094200000	0.000522432	0	0	9.55196	0	0	33313000	0	0	0	601680000	838260000	516410000	0	0	0	∞	0	0	0	0	0	0	1131900000	729420000	840470000	0	0	0	0	0	0	0	0	0	0	754030000	964080000	609030000	0
Serine/threonine-protein phosphatase PGAM5, mitochondrial		PGAM5	0	1141300	0	0	338360000	2492900000	2094200000	0.00337303	0	0	0	0	0	0	0	0	0	601680000	838260000	516410000	0	0	0	0	0	0	10145000	0	0	0	1131900000	729420000	840470000	0	0	0	∞	0	0	0	0	0	0	754030000	964080000	609030000	0
Putative SAGE1-like protein			0	0	0	0	338360000	2492900000	2094200000	0	0	0	0	0	0	0	0	0	12297000000	601680000	838260000	516410000	0	0	23.8125	0	0	0	0	0	0	0	1131900000	729420000	840470000	0	0	0	0	0	0	0	0	0	0	754030000	964080000	609030000	0
ER lumen protein-retaining receptor 2		KDELR2	0	0	0	0	338360000	2492900000	2094200000	0	0	0	0	0	0	0	3071700	0	0	601680000	838260000	516410000	0.00510521	0	0	0	0	0	0	0	0	0	1131900000	729420000	840470000	0	0	0	0	0	0	0	0	0	0	754030000	964080000	609030000	0
Protein EFR3 homolog A		EFR3A	0	0	0	0	338360000	2492900000	2094200000	0	0	0	0	0	0	0	3587200	0	0	601680000	838260000	516410000	0.00596197	0	0	0	0	0	0	0	0	0	1131900000	729420000	840470000	0	0	0	0	0	0	0	0	0	0	754030000	964080000	609030000	0
Inverted formin-2		INF2	0	0	0	0	338360000	2492900000	2094200000	0	0	0	0	0	0	6250500	6706900	0	0	601680000	838260000	516410000	0.011147	0	0	0.931951	0	0	4197100	0	0	0	1131900000	729420000	840470000	0	0	0	∞	0	0	0	0	0	0	754030000	964080000	609030000	0
AP-2 complex subunit sigma		AP2S1	0	0	0	0	338360000	2492900000	2094200000	0	0	0	0	0	0	0	7712800	0	0	601680000	838260000	516410000	0.0128188	0	0	0	0	0	0	0	0	0	1131900000	729420000	840470000	0	0	0	0	0	0	0	0	0	0	754030000	964080000	609030000	0
D-3-phosphoglycerate dehydrogenase		PHGDH	6148900	0	0	0	338360000	2492900000	2094200000	0	0	0	∞	0	0	15667000	9445900	0	0	601680000	838260000	516410000	0.0156992	0	0	1.6586	0	0	5179200	0	0	0	1131900000	729420000	840470000	0	0	0	∞	0	0	0	0	0	0	754030000	964080000	609030000	0
Protein SGT1		ECD	0	0	0	0	338360000	2492900000	2094200000	0	0	0	0	0	0	31898000	9899000	0	0	601680000	838260000	516410000	0.0164523	0	0	3.22235	0	0	0	0	0	0	1131900000	729420000	840470000	0	0	0	0	0	0	0	0	0	0	754030000	964080000	609030000	0
Neuron-specific calcium-binding protein hippocalcin;Neurocalcin-delta;Hippocalcin-like protein 1		HPCA;NCALD;HPCAL1	0	0	0	0	338360000	2492900000	2094200000	0	0	0	0	0	0	10766000	10025000	0	0	601680000	838260000	516410000	0.0166617	0	0	1.07392	0	0	0	0	0	0	1131900000	729420000	840470000	0	0	0	0	0	0	0	0	0	0	754030000	964080000	609030000	0
ADP/ATP translocase 3;ADP/ATP translocase 3, N-terminally processed		SLC25A6	0	0	0	0	338360000	2492900000	2094200000	0	0	0	0	0	0	15975000	10234000	0	0	601680000	838260000	516410000	0.017009	0	0	1.56097	0	0	0	0	0	0	1131900000	729420000	840470000	0	0	0	0	0	0	0	0	0	0	754030000	964080000	609030000	0
V-type proton ATPase 116 kDa subunit a isoform 1		ATP6V0A1	0	0	0	0	338360000	2492900000	2094200000	0	0	0	0	0	0	0	10305000	0	0	601680000	838260000	516410000	0.017127	0	0	0	0	0	0	0	0	0	1131900000	729420000	840470000	0	0	0	0	0	0	0	0	0	0	754030000	964080000	609030000	0
AP-1 complex subunit beta-1		AP1B1	0	0	0	0	338360000	2492900000	2094200000	0	0	0	0	0	0	26317000	10479000	0	0	601680000	838260000	516410000	0.0174162	0	0	2.5114	0	0	0	0	0	0	1131900000	729420000	840470000	0	0	0	0	0	0	0	0	0	0	754030000	964080000	609030000	0
Flotillin-1		FLOT1	0	0	0	0	338360000	2492900000	2094200000	0	0	0	0	0	0	16231000	10599000	0	0	601680000	838260000	516410000	0.0176157	0	0	1.53137	0	0	0	0	0	0	1131900000	729420000	840470000	0	0	0	0	0	0	0	0	0	0	754030000	964080000	609030000	0
Tight junction protein ZO-2		TJP2	0	0	0	0	338360000	2492900000	2094200000	0	0	0	0	0	0	18607000	11492000	0	0	601680000	838260000	516410000	0.0190999	0	0	1.61913	0	0	7406500	0	0	0	1131900000	729420000	840470000	0	0	0	∞	0	0	0	0	0	0	754030000	964080000	609030000	0
60S ribosomal protein L18a		RPL18A	0	0	0	0	338360000	2492900000	2094200000	0	0	0	0	0	0	8370500	13476000	0	0	601680000	838260000	516410000	0.0223973	0	0	0.621141	0	0	0	0	0	0	1131900000	729420000	840470000	0	0	0	0	0	0	0	0	0	0	754030000	964080000	609030000	0
Protein-methionine sulfoxide oxidase MICAL3		MICAL3	0	0	0	0	338360000	2492900000	2094200000	0	0	0	0	0	0	0	14903000	0	0	601680000	838260000	516410000	0.024769	0	0	0	0	0	0	0	0	0	1131900000	729420000	840470000	0	0	0	0	0	0	0	0	0	0	754030000	964080000	609030000	0
Ras-related protein R-Ras2		RRAS2	8690500	298140	0	0	338360000	2492900000	2094200000	0.000881133	0	0	29.1491	0	0	44714000	16302000	0	0	601680000	838260000	516410000	0.0270941	0	0	2.74285	0	0	16469000	0	0	0	1131900000	729420000	840470000	0	0	0	∞	0	0	0	0	0	0	754030000	964080000	609030000	0
40S ribosomal protein S5;40S ribosomal protein S5, N-terminally processed		RPS5	0	0	0	0	338360000	2492900000	2094200000	0	0	0	0	0	0	15788000	16745000	0	0	601680000	838260000	516410000	0.0278304	0	0	0.942849	0	0	0	0	0	0	1131900000	729420000	840470000	0	0	0	0	0	0	0	0	0	0	754030000	964080000	609030000	0
40S ribosomal protein S16		RPS16	0	0	0	0	338360000	2492900000	2094200000	0	0	0	0	0	0	15788000	17387000	0	0	601680000	838260000	516410000	0.0288974	0	0	0.908035	0	0	11204000	0	0	0	1131900000	729420000	840470000	0	0	0	∞	0	0	0	0	0	0	754030000	964080000	609030000	0
Importin-5		IPO5	0	0	0	0	338360000	2492900000	2094200000	0	0	0	0	0	0	29945000	19577000	0	0	601680000	838260000	516410000	0.0325372	0	0	1.5296	0	0	24946000	0	0	0	1131900000	729420000	840470000	0	0	0	∞	0	0	0	0	0	0	754030000	964080000	609030000	0
A-kinase anchor protein 2		AKAP2	9326200	0	16293000	0	338360000	2492900000	2094200000	0	0.00653576	0	∞	∞	∞	118870000	19732000	3574800	4721300	601680000	838260000	516410000	0.0327948	0.00426455	0.00914254	6.02422	0.466451	0.130037	25440000	0	0	0	1131900000	729420000	840470000	0	0	0	∞	0	0	0	0	0	0	754030000	964080000	609030000	0
Actin filament-associated protein 1		AFAP1	0	0	0	0	338360000	2492900000	2094200000	0	0	0	0	0	0	23657000	21215000	0	0	601680000	838260000	516410000	0.0352596	0	0	1.11511	0	0	0	0	0	0	1131900000	729420000	840470000	0	0	0	0	0	0	0	0	0	0	754030000	964080000	609030000	0
AP-2 complex subunit mu		AP2M1	0	0	0	0	338360000	2492900000	2094200000	0	0	0	0	0	0	15834000	23641000	0	0	601680000	838260000	516410000	0.0392917	0	0	0.669769	0	0	0	0	0	0	1131900000	729420000	840470000	0	0	0	0	0	0	0	0	0	0	754030000	964080000	609030000	0
Junction plakoglobin		JUP	0	0	0	0	338360000	2492900000	2094200000	0	0	0	0	0	0	25122000	23766000	0	0	601680000	838260000	516410000	0.0394994	0	0	1.05706	0	0	12289000	0	0	0	1131900000	729420000	840470000	0	0	0	∞	0	0	0	0	0	0	754030000	964080000	609030000	0
Myosin regulatory light polypeptide 9		MYL9	0	0	0	0	338360000	2492900000	2094200000	0	0	0	0	0	0	14997000	25245000	0	0	601680000	838260000	516410000	0.0419575	0	0	0.594058	0	0	0	0	0	0	1131900000	729420000	840470000	0	0	0	0	0	0	0	0	0	0	754030000	964080000	609030000	0
Alpha-actinin-4		ACTN4	3334000	0	0	0	338360000	2492900000	2094200000	0	0	0	∞	0	0	16118000	25747000	0	0	601680000	838260000	516410000	0.0427918	0	0	0.626015	0	0	6630900	0	0	0	1131900000	729420000	840470000	0	0	0	∞	0	0	0	0	0	0	754030000	964080000	609030000	0
Importin-9		IPO9	0	0	0	0	338360000	2492900000	2094200000	0	0	0	0	0	0	37201000	27023000	0	0	601680000	838260000	516410000	0.0449126	0	0	1.37664	0	0	0	0	0	0	1131900000	729420000	840470000	0	0	0	0	0	0	0	0	0	0	754030000	964080000	609030000	0
Filamin-C		FLNC	0	0	0	0	338360000	2492900000	2094200000	0	0	0	0	0	0	0	27119000	0	0	601680000	838260000	516410000	0.0450721	0	0	0	0	0	0	0	0	0	1131900000	729420000	840470000	0	0	0	0	0	0	0	0	0	0	754030000	964080000	609030000	0
Supervillin		SVIL	0	171990	0	0	338360000	2492900000	2094200000	0.000508305	0	0	0	0	0	36911000	37055000	0	0	601680000	838260000	516410000	0.0615859	0	0	0.996114	0	0	3290900	0	0	0	1131900000	729420000	840470000	0	0	0	∞	0	0	0	0	0	0	754030000	964080000	609030000	0
CD59 glycoprotein		CD59	77381000	655570	0	0	338360000	2492900000	2094200000	0.00193749	0	0	118.036	0	0	142500000	38707000	0	0	601680000	838260000	516410000	0.0643315	0	0	3.6815	0	0	35262000	0	0	0	1131900000	729420000	840470000	0	0	0	∞	0	0	0	0	0	0	754030000	964080000	609030000	0
Melanotransferrin		MFI2	0	910450	0	0	338360000	2492900000	2094200000	0.00269077	0	0	0	0	0	22538000	40549000	0	0	601680000	838260000	516410000	0.067393	0	0	0.555821	0	0	11982000	0	0	0	1131900000	729420000	840470000	0	0	0	∞	0	0	0	0	0	0	754030000	964080000	609030000	0
Fragile X mental retardation syndrome-related protein 1		FXR1	0	0	0	0	338360000	2492900000	2094200000	0	0	0	0	0	0	25926000	41070000	0	0	601680000	838260000	516410000	0.0682589	0	0	0.631264	0	0	19507000	0	0	0	1131900000	729420000	840470000	0	0	0	∞	0	0	0	0	0	0	754030000	964080000	609030000	0
Unconventional myosin-Va		MYO5A	0	0	0	0	338360000	2492900000	2094200000	0	0	0	0	0	0	6265000	41814000	0	0	601680000	838260000	516410000	0.0694954	0	0	0.14983	0	0	0	0	0	0	1131900000	729420000	840470000	0	0	0	0	0	0	0	0	0	0	754030000	964080000	609030000	0
Lactadherin;Lactadherin short form;Medin		MFGE8	0	0	0	0	338360000	2492900000	2094200000	0	0	0	0	0	0	43331000	42577000	0	0	601680000	838260000	516410000	0.0707635	0	0	1.01771	0	0	21754000	0	0	0	1131900000	729420000	840470000	0	0	0	∞	0	0	0	0	0	0	754030000	964080000	609030000	0
60S ribosomal protein L21		RPL21	0	0	0	0	338360000	2492900000	2094200000	0	0	0	0	0	0	27911000	55812000	0	0	601680000	838260000	516410000	0.0927603	0	0	0.50009	0	0	0	0	0	0	1131900000	729420000	840470000	0	0	0	0	0	0	0	0	0	0	754030000	964080000	609030000	0
Guanine nucleotide-binding protein G(I)/G(S)/G(T) subunit beta-1		GNB1	4557000	0	0	0	338360000	2492900000	2094200000	0	0	0	∞	0	0	64061000	57339000	0	0	601680000	838260000	516410000	0.0952982	0	0	1.11723	0	0	0	0	0	0	1131900000	729420000	840470000	0	0	0	0	0	0	0	0	0	0	754030000	964080000	609030000	0
Phostensin		PPP1R18	0	0	0	0	338360000	2492900000	2094200000	0	0	0	0	0	0	102380000	75558000	0	0	601680000	838260000	516410000	0.125578	0	0	1.35499	0	0	0	0	0	0	1131900000	729420000	840470000	0	0	0	0	0	0	0	0	0	0	754030000	964080000	609030000	0
F-actin-capping protein subunit beta		CAPZB	32544000	0	0	0	338360000	2492900000	2094200000	0	0	0	∞	0	0	40582000	79785000	0	0	601680000	838260000	516410000	0.132604	0	0	0.508642	0	0	24236000	0	0	0	1131900000	729420000	840470000	0	0	0	∞	0	0	0	0	0	0	754030000	964080000	609030000	0
Guanine nucleotide-binding protein G(k) subunit alpha		GNAI3	11839000	0	0	0	338360000	2492900000	2094200000	0	0	0	∞	0	0	88977000	87603000	0	0	601680000	838260000	516410000	0.145597	0	0	1.01568	0	0	31799000	0	0	0	1131900000	729420000	840470000	0	0	0	∞	0	0	0	0	0	0	754030000	964080000	609030000	0
Allograft inflammatory factor 1-like		AIF1L	7585800	2621500	0	0	338360000	2492900000	2094200000	0.00774767	0	0	2.89369	0	0	190070000	125360000	0	0	601680000	838260000	516410000	0.20835	0	0	1.51619	0	0	33364000	0	0	0	1131900000	729420000	840470000	0	0	0	∞	0	0	0	0	0	0	754030000	964080000	609030000	0
Clathrin interactor 1		CLINT1	4500800	1099700	0	0	338360000	2492900000	2094200000	0.00325009	0	0	4.09275	0	0	152160000	162850000	0	0	601680000	838260000	516410000	0.270659	0	0	0.934357	0	0	46194000	0	0	0	1131900000	729420000	840470000	0	0	0	∞	0	0	0	0	0	0	754030000	964080000	609030000	0
C2 domain-containing protein 3		C2CD3	22744000	0	0	26050000	338360000	2492900000	2094200000	0	0	0.0124391	∞	0	0	45626000	16349000	36025000	31623000	601680000	838260000	516410000	0.0271723	0.0429759	0.0612362	2.79075	0.701806	1.58161	30789000	0	0	24473000	1131900000	729420000	840470000	0	0	0.0291182	∞	0	0	0	0	0	0	754030000	964080000	609030000	0
Haptoglobin-related protein;Haptoglobin;Haptoglobin alpha chain;Haptoglobin beta chain		HPR;HP	6543000	0	5118800	0	338360000	2492900000	2094200000	0	0.00205335	0	∞	∞	∞	0	0	0	0	601680000	838260000	516410000	0	0	0	0	0	0	0	0	2635100	5066700	1131900000	729420000	840470000	0	0.0036126	0.00602841	0	0.599262	∞	0	0	0	0	754030000	964080000	609030000	0
TGF-beta-activated kinase 1 and MAP3K7-binding protein 2		TAB2	3896700	319290	3748300	0	338360000	2492900000	2094200000	0.00094364	0.00150359	0	12.2043	∞	1.59339	10126000	3629100	0	0	601680000	838260000	516410000	0.00603161	0	0	2.79022	0	0	8993200	0	2967100	2919600	1131900000	729420000	840470000	0	0.00406775	0.00347377	∞	1.17099	∞	0	0	0	0	754030000	964080000	609030000	0
Probable ATP-dependent RNA helicase DDX5;Probable ATP-dependent RNA helicase DDX17		DDX5;DDX17	0	0	0	0	338360000	2492900000	2094200000	0	0	0	0	0	0	20117000	37131000	0	0	601680000	838260000	516410000	0.0617122	0	0	0.541784	0	0	71052000	0	8193800	13014000	1131900000	729420000	840470000	0	0.0112333	0.0154842	∞	0.725469	∞	7733100	0	0	0	754030000	964080000	609030000	0
Progesterone-induced-blocking factor 1		PIBF1	0	0	0	0	338360000	2492900000	2094200000	0	0	0	0	0	0	23877000	23245000	0	0	601680000	838260000	516410000	0.0386335	0	0	1.02719	0	0	20902000	0	22314000	19439000	1131900000	729420000	840470000	0	0.0305914	0.0231287	∞	1.32266	∞	0	0	0	0	754030000	964080000	609030000	0
Titin		TTN	0	0	0	0	338360000	2492900000	2094200000	0	0	0	0	0	0	0	10371000	0	0	601680000	838260000	516410000	0.0172367	0	0	0	0	0	237520000	0	148910000	0	1131900000	729420000	840470000	0	0.204149	0	∞	∞	∞	0	0	0	0	754030000	964080000	609030000	0
Prolyl 4-hydroxylase subunit alpha-2		P4HA2	0	0	0	0	338360000	2492900000	2094200000	0	0	0	0	0	0	6853300	17337000	0	0	601680000	838260000	516410000	0.0288143	0	0	0.395299	0	0	0	1009600	0	0	1131900000	729420000	840470000	0.000891952	0	0	0	0	0	0	0	0	0	754030000	964080000	609030000	0
Cytospin-A		SPECC1L	0	0	0	0	338360000	2492900000	2094200000	0	0	0	0	0	0	174320000	44001000	0	0	601680000	838260000	516410000	0.0731302	0	0	3.96173	0	0	14294000	2668200	1560500	0	1131900000	729420000	840470000	0.00235728	0.00213937	0	5.35717	∞	0.907561	0	0	0	0	754030000	964080000	609030000	0
Eukaryotic translation initiation factor 3 subunit F		EIF3F	4852600	0	0	0	338360000	2492900000	2094200000	0	0	0	∞	0	0	0	5511900	0	0	601680000	838260000	516410000	0.00916085	0	0	0	0	0	0	3268900	1399800	0	1131900000	729420000	840470000	0.00288798	0.00191906	0	0	∞	0.6645	0	0	0	0	754030000	964080000	609030000	0
NEDD4 family-interacting protein 1		NDFIP1	0	0	0	0	338360000	2492900000	2094200000	0	0	0	0	0	0	11780000	13634000	0	0	601680000	838260000	516410000	0.0226599	0	0	0.864016	0	0	9085100	3874400	0	0	1131900000	729420000	840470000	0.00342292	0	0	2.34491	0	0	0	0	0	0	754030000	964080000	609030000	0
Phosphoprotein associated with glycosphingolipid-enriched microdomains 1		PAG1	0	0	0	0	338360000	2492900000	2094200000	0	0	0	0	0	0	12869000	17059000	0	0	601680000	838260000	516410000	0.0283523	0	0	0.754382	0	0	13362000	3888000	0	0	1131900000	729420000	840470000	0.00343493	0	0	3.43673	0	0	0	0	0	0	754030000	964080000	609030000	0
Unconventional myosin-Id		MYO1D	0	0	0	0	338360000	2492900000	2094200000	0	0	0	0	0	0	88070000	52940000	0	0	601680000	838260000	516410000	0.087987	0	0	1.66358	0	0	7353000	4180300	0	0	1131900000	729420000	840470000	0.00369317	0	0	1.75896	0	0	0	0	0	0	754030000	964080000	609030000	0
Eukaryotic translation initiation factor 5B		EIF5B	59874000	206680000	0	0	338360000	2492900000	2094200000	0.610829	0	0	0.289694	0	0	8962300	4700300	0	0	601680000	838260000	516410000	0.00781196	0	0	1.90675	0	0	131530000	4191800	0	0	1131900000	729420000	840470000	0.00370333	0	0	31.3779	0	0	0	0	0	0	754030000	964080000	609030000	0
BAG family molecular chaperone regulator 2		BAG2	12995000	0	0	0	338360000	2492900000	2094200000	0	0	0	∞	0	0	60568000	70796000	0	0	601680000	838260000	516410000	0.117664	0	0	0.855529	0	0	22315000	4533300	0	0	1131900000	729420000	840470000	0.00400504	0	0	4.92246	0	0	0	0	0	0	754030000	964080000	609030000	0
RNA-binding protein FUS		FUS	0	704830	0	1297400	338360000	2492900000	2094200000	0.00208308	0	0.000619521	0	0	0	31579000	35648000	0	0	601680000	838260000	516410000	0.0592474	0	0	0.885856	0	0	55235000	4950100	0	0	1131900000	729420000	840470000	0.00437327	0	0	11.1584	0	0	1490800	0	0	0	754030000	964080000	609030000	0
Leucine-rich repeat and calponin homology domain-containing protein 3		LRCH3	0	0	0	0	338360000	2492900000	2094200000	0	0	0	0	0	0	14658000	48877000	0	0	601680000	838260000	516410000	0.0812342	0	0	0.299896	0	0	9808200	5936400	0	0	1131900000	729420000	840470000	0.00524463	0	0	1.65221	0	0	0	0	0	0	754030000	964080000	609030000	0
AP-2 complex subunit alpha-1		AP2A1	11960000	0	0	0	338360000	2492900000	2094200000	0	0	0	∞	0	0	480320000	555160000	0	0	601680000	838260000	516410000	0.922683	0	0	0.865192	0	0	97762000	6563500	0	0	1131900000	729420000	840470000	0.00579866	0	0	14.8948	0	0	0	0	0	0	754030000	964080000	609030000	0
EF-hand domain-containing protein D1		EFHD1	14025000	0	0	0	338360000	2492900000	2094200000	0	0	0	∞	0	0	52916000	75971000	0	0	601680000	838260000	516410000	0.126265	0	0	0.696529	0	0	10971000	6622100	0	0	1131900000	729420000	840470000	0.00585043	0	0	1.65673	0	0	0	0	0	0	754030000	964080000	609030000	0
40S ribosomal protein S14		RPS14	0	0	0	3614400	338360000	2492900000	2094200000	0	0	0.00172591	0	0	0	0	7316600	0	0	601680000	838260000	516410000	0.0121603	0	0	0	0	0	0	7492600	0	0	1131900000	729420000	840470000	0.00661949	0	0	0	0	0	0	0	0	0	754030000	964080000	609030000	0
14-3-3 protein gamma;14-3-3 protein gamma, N-terminally processed		YWHAG	0	0	0	0	338360000	2492900000	2094200000	0	0	0	0	0	0	0	8565300	0	0	601680000	838260000	516410000	0.0142356	0	0	0	0	0	14929000	8176100	0	0	1131900000	729420000	840470000	0.00722334	0	0	1.82593	0	0	0	0	0	0	754030000	964080000	609030000	0
Protein phosphatase 1G		PPM1G	0	0	0	0	338360000	2492900000	2094200000	0	0	0	0	0	0	34853000	31155000	0	0	601680000	838260000	516410000	0.05178	0	0	1.1187	0	0	0	8238700	6127600	0	1131900000	729420000	840470000	0.00727865	0.00840065	0	0	∞	1.15415	6283900	0	0	0	754030000	964080000	609030000	0
60S ribosomal protein L6		RPL6	0	0	0	0	338360000	2492900000	2094200000	0	0	0	0	0	0	37958000	261200000	0	0	601680000	838260000	516410000	0.434118	0	0	0.145322	0	0	73177000	8679300	1424400	4087700	1131900000	729420000	840470000	0.0076679	0.00195278	0.00486359	8.43121	0.401511	0.25467	0	0	0	0	754030000	964080000	609030000	0
LIM and calponin homology domains-containing protein 1		LIMCH1	6276300	319840	0	0	338360000	2492900000	2094200000	0.000945265	0	0	19.6232	0	0	542740000	284850000	0	0	601680000	838260000	516410000	0.473424	0	0	1.90535	0	0	176990000	8728600	0	0	1131900000	729420000	840470000	0.00771146	0	0	20.277	0	0	0	0	0	0	754030000	964080000	609030000	0
Calreticulin		CALR	0	0	0	0	338360000	2492900000	2094200000	0	0	0	0	0	0	0	0	0	0	601680000	838260000	516410000	0	0	0	0	0	0	20332000	9361800	645000	0	1131900000	729420000	840470000	0.00827087	0.000884264	0	2.1718	∞	0.106913	0	0	0	0	754030000	964080000	609030000	0
Uveal autoantigen with coiled-coil domains and ankyrin repeats		UACA	2539100	0	0	0	338360000	2492900000	2094200000	0	0	0	∞	0	0	260440000	27294000	0	0	601680000	838260000	516410000	0.045363	0	0	9.54202	0	0	103560000	9547400	0	0	1131900000	729420000	840470000	0.00843484	0	0	10.8469	0	0	0	0	0	0	754030000	964080000	609030000	0
Clathrin light chain A		CLTA	0	5770300	13820000	0	338360000	2492900000	2094200000	0.0170537	0.00554374	0	0	∞	0.325075	271350000	251570000	0	0	601680000	838260000	516410000	0.418113	0	0	1.07863	0	0	107140000	11510000	0	0	1131900000	729420000	840470000	0.0101687	0	0	9.30843	0	0	0	0	0	0	754030000	964080000	609030000	0
PRKC apoptosis WT1 regulator protein		PAWR	37530000	1040300	0	0	338360000	2492900000	2094200000	0.00307454	0	0	36.0761	0	0	300740000	368460000	0	0	601680000	838260000	516410000	0.612385	0	0	0.816208	0	0	40915000	14930000	0	0	1131900000	729420000	840470000	0.0131902	0	0	2.74046	0	0	0	0	0	0	754030000	964080000	609030000	0
Importin subunit beta-1		KPNB1	24622000	451760	0	0	338360000	2492900000	2094200000	0.00133515	0	0	54.5024	0	0	101250000	164450000	0	0	601680000	838260000	516410000	0.273318	0	0	0.615689	0	0	50146000	15920000	0	0	1131900000	729420000	840470000	0.0140648	0	0	3.14987	0	0	0	0	0	0	754030000	964080000	609030000	0
60S ribosomal protein L15		RPL15	0	0	0	0	338360000	2492900000	2094200000	0	0	0	0	0	0	6588200	84880000	0	0	601680000	838260000	516410000	0.141072	0	0	0.0776178	0	0	17614000	15974000	0	0	1131900000	729420000	840470000	0.0141126	0	0	1.10267	0	0	0	0	0	0	754030000	964080000	609030000	0
Membrane-spanning 4-domains subfamily A member 10		MS4A10	32135000	14458000	104570000	72957000	338360000	2492900000	2094200000	0.0427296	0.0419471	0.0348376	2.22264	1.20407	0.981687	0	16880000	31170000	47074000	601680000	838260000	516410000	0.0280548	0.0371842	0.0911563	0	0.407917	1.32541	21070000	18699000	30517000	23134000	1131900000	729420000	840470000	0.01652	0.0418374	0.0275251	1.1268	1.51997	2.53253	0	0	0	0	754030000	964080000	609030000	0
AP-2 complex subunit beta		AP2B1	38787000	0	0	0	338360000	2492900000	2094200000	0	0	0	∞	0	0	641730000	518030000	0	0	601680000	838260000	516410000	0.860973	0	0	1.23879	0	0	195940000	21389000	0	0	1131900000	729420000	840470000	0.0188965	0	0	9.16078	0	0	0	0	0	0	754030000	964080000	609030000	0
Protein phosphatase 1 regulatory subunit 12A		PPP1R12A	23696000	0	0	0	338360000	2492900000	2094200000	0	0	0	∞	0	0	350960000	159110000	0	0	601680000	838260000	516410000	0.264443	0	0	2.20577	0	0	172280000	21616000	0	0	1131900000	729420000	840470000	0.0190971	0	0	7.97002	0	0	0	0	0	0	754030000	964080000	609030000	0
Tubulin alpha-1C chain;Tubulin alpha-8 chain		TUBA1C;TUBA8	29613000	0	0	0	338360000	2492900000	2094200000	0	0	0	∞	0	0	72518000	43246000	16047000	0	601680000	838260000	516410000	0.0718754	0.0191432	0	1.67687	∞	0.266339	52019000	23228000	0	0	1131900000	729420000	840470000	0.0205212	0	0	2.2395	0	0	18000000	0	0	0	754030000	964080000	609030000	0
Beta-actin-like protein 2		ACTBL2	0	20420000	0	0	338360000	2492900000	2094200000	0.0603499	0	0	0	0	0	139730000	43878000000	0	0	601680000	838260000	516410000	72.9258	0	0	0.00318451	0	0	0	25340000	0	0	1131900000	729420000	840470000	0.0223871	0	0	0	0	0	0	0	0	0	754030000	964080000	609030000	0
Myosin regulatory light chain 12A		MYL12A	0	0	0	0	338360000	2492900000	2094200000	0	0	0	0	0	0	119920000	113210000	0	0	601680000	838260000	516410000	0.188156	0	0	1.05927	0	0	35476000	28635000	0	0	1131900000	729420000	840470000	0.0252982	0	0	1.2389	0	0	0	0	0	0	754030000	964080000	609030000	0
Serine/threonine-protein phosphatase PP1-alpha catalytic subunit;Serine/threonine-protein phosphatase PP1-gamma catalytic subunit		PPP1CA;PPP1CC	3823000	339950	0	0	338360000	2492900000	2094200000	0.0010047	0	0	11.2458	0	0	372850000	302500000	0	0	601680000	838260000	516410000	0.502759	0	0	1.23256	0	0	133490000	35463000	0	0	1131900000	729420000	840470000	0.0313305	0	0	3.7642	0	0	0	0	0	0	754030000	964080000	609030000	0
Hydrocephalus-inducing protein homolog		HYDIN	0	0	0	0	338360000	2492900000	2094200000	0	0	0	0	0	0	36816000	28574000	19545000	0	601680000	838260000	516410000	0.0474904	0.0233162	0	1.28844	∞	0.490966	0	37111000	0	13701000	1131900000	729420000	840470000	0.0327865	0	0.0163016	0	0	0	0	0	0	0	754030000	964080000	609030000	0
Ornithine aminotransferase, mitochondrial;Ornithine aminotransferase, hepatic form;Ornithine aminotransferase, renal form		OAT	63489000	7277000	28839000	16320000	338360000	2492900000	2094200000	0.0215067	0.0115685	0.00779295	8.72461	1.48448	0.537901	15774000	20663000	8696800	0	601680000	838260000	516410000	0.0343422	0.0103748	0	0.763394	∞	0.302102	23777000	37210000	15378000	0	1131900000	729420000	840470000	0.0328739	0.0210825	0	0.638995	∞	0.641314	25914000	0	0	0	754030000	964080000	609030000	0
Leucine zipper protein 1		LUZP1	9307200	1496900	0	0	338360000	2492900000	2094200000	0.00442399	0	0	6.21765	0	0	448350000	433070000	0	0	601680000	838260000	516410000	0.719768	0	0	1.03528	0	0	233360000	37398000	0	0	1131900000	729420000	840470000	0.03304	0	0	6.23991	0	0	0	0	0	0	754030000	964080000	609030000	0
60S ribosomal protein L30		RPL30	50529000	2422900	0	23560000	338360000	2492900000	2094200000	0.00716072	0	0.0112501	20.8548	0	0	236660000	206920000	0	16207000	601680000	838260000	516410000	0.343904	0	0.031384	1.14373	0	0	112920000	38851000	0	17202000	1131900000	729420000	840470000	0.0343237	0	0.0204671	2.90649	0	0	0	0	0	0	754030000	964080000	609030000	0
Nuclear pore complex protein Nup93		NUP93	93612000	11683000	72047000	63137000	338360000	2492900000	2094200000	0.0345283	0.0289009	0.0301485	8.01267	0.958617	0.83702	40249000	25353000	48008000	29656000	601680000	838260000	516410000	0.042137	0.057271	0.0574272	1.58754	0.99728	1.35916	56555000	41706000	38637000	33239000	1131900000	729420000	840470000	0.036846	0.0529695	0.0395481	1.35604	1.33937	1.43759	0	0	0	0	754030000	964080000	609030000	0
5-nucleotidase		NT5E	579170000	70047000	15309000	0	338360000	2492900000	2094200000	0.207019	0.00614104	0	8.26831	∞	0.0296641	1909700000	1869400000	0	0	601680000	838260000	516410000	3.10697	0	0	1.02156	0	0	717410000	96623000	0	0	1131900000	729420000	840470000	0.0853635	0	0	7.42484	0	0	0	0	0	0	754030000	964080000	609030000	0
Actin, cytoplasmic 1;Actin, cytoplasmic 1, N-terminally processed		ACTB	355380000	78369000	0	0	338360000	2492900000	2094200000	0.231614	0	0	4.5347	0	0	1033000000	776010000	0	0	601680000	838260000	516410000	1.28974	0	0	1.33117	0	0	564130000	370000000	0	0	1131900000	729420000	840470000	0.326884	0	0	1.52468	0	0	0	0	0	0	754030000	964080000	609030000	0
Spectrin beta chain, non-erythrocytic 1		SPTBN1	0	857470	0	0	338360000	2492900000	2094200000	0.00253419	0	0	0	0	0	9286100	177570000	0	0	601680000	838260000	516410000	0.295124	0	0	0.0522954	0	0	16752000	0	0	0	1131900000	729420000	840470000	0	0	0	∞	0	0	0	0	0	1239500	754030000	964080000	609030000	0
Zinc finger protein RFP		TRIM27	0	0	0	0	338360000	2492900000	2094200000	0	0	0	0	0	0	0	0	0	0	601680000	838260000	516410000	0	0	0	0	0	0	0	0	0	0	1131900000	729420000	840470000	0	0	0	0	0	0	3074600	0	0	3696200	754030000	964080000	609030000	0
40S ribosomal protein S10		RPS10	0	0	0	0	338360000	2492900000	2094200000	0	0	0	0	0	0	0	0	0	0	601680000	838260000	516410000	0	0	0	0	0	0	7797300	0	0	0	1131900000	729420000	840470000	0	0	0	∞	0	0	0	0	0	8362500	754030000	964080000	609030000	0
Constitutive coactivator of PPAR-gamma-like protein 1		FAM120A	0	0	186970000	276330000	338360000	2492900000	2094200000	0	0.075001	0.13195	0	0.568404	∞	106340000	95305000	115020000	109210000	601680000	838260000	516410000	0.158398	0.137213	0.211479	1.11579	0.648824	0.866253	0	0	0	164460000	1131900000	729420000	840470000	0	0	0.195676	0	0	0	22975000	408150	0	0	754030000	964080000	609030000	0.000541291
General transcription factor IIF subunit 1		GTF2F1	1654700	0	1860000	0	338360000	2492900000	2094200000	0	0.000746119	0	∞	∞	∞	0	0	0	0	601680000	838260000	516410000	0	0	0	0	0	0	3286900	3407900	0	0	1131900000	729420000	840470000	0.00301078	0	0	0.964494	0	0	868730	616740	0	0	754030000	964080000	609030000	0.000817925
Annexin A6		ANXA6	0	132290	0	0	338360000	2492900000	2094200000	0.000390974	0	0	0	0	0	0	0	0	0	601680000	838260000	516410000	0	0	0	0	0	0	8451500	1625200	0	0	1131900000	729420000	840470000	0.00143582	0	0	5.20028	0	0	326590	637230	0	751440	754030000	964080000	609030000	0.000845099
Death-associated protein kinase 3		DAPK3	4555600	0	0	0	338360000	2492900000	2094200000	0	0	0	∞	0	0	39485000	42552000	0	0	601680000	838260000	516410000	0.070722	0	0	0.927923	0	0	0	5685700	0	0	1131900000	729420000	840470000	0.00502315	0	0	0	0	0	0	1226400	0	0	754030000	964080000	609030000	0.00162646
Ubiquitin carboxyl-terminal hydrolase 15		USP15	0	0	0	0	338360000	2492900000	2094200000	0	0	0	0	0	0	0	0	0	0	601680000	838260000	516410000	0	0	0	0	0	0	0	0	0	0	1131900000	729420000	840470000	0	0	0	0	0	0	0	1876800	0	4534200	754030000	964080000	609030000	0.00248903
Importin-8		IPO8	0	0	0	0	338360000	2492900000	2094200000	0	0	0	0	0	0	0	0	0	0	601680000	838260000	516410000	0	0	0	0	0	0	0	0	0	0	1131900000	729420000	840470000	0	0	0	0	0	0	4521300	1968800	0	0	754030000	964080000	609030000	0.00261104
ATP-dependent RNA helicase DDX3X		DDX3X	4487900	0	0	0	338360000	2492900000	2094200000	0	0	0	∞	0	0	36066000	30346000	7516500	3900300	601680000	838260000	516410000	0.0504354	0.00896679	0.00755272	1.18849	1.18723	0.177787	20019000	4195000	0	0	1131900000	729420000	840470000	0.00370616	0	0	4.77211	0	0	0	3517100	0	0	754030000	964080000	609030000	0.0046644
60S ribosomal protein L7a		RPL7A	8363500	1570600	9357100	18556000	338360000	2492900000	2094200000	0.0046418	0.0037535	0.00886066	5.32504	0.423614	0.80863	131350000	185210000	0	0	601680000	838260000	516410000	0.307821	0	0	0.709195	0	0	82363000	40792000	0	0	1131900000	729420000	840470000	0.0360385	0	0	2.0191	0	0	0	3574400	0	0	754030000	964080000	609030000	0.00474039
Protein arginine N-methyltransferase 1		PRMT1	0	0	0	0	338360000	2492900000	2094200000	0	0	0	0	0	0	0	0	0	0	601680000	838260000	516410000	0	0	0	0	0	0	14261000	0	0	0	1131900000	729420000	840470000	0	0	0	∞	0	0	4583200	4105600	3869600	0	754030000	964080000	609030000	0.00544488
TOM1-like protein 2		TOM1L2	13079000	0	0	0	338360000	2492900000	2094200000	0	0	0	∞	0	0	275400000	217760000	0	0	601680000	838260000	516410000	0.36192	0	0	1.2647	0	0	61639000	16967000	7343000	0	1131900000	729420000	840470000	0.0149898	0.0100669	0	3.63288	∞	0.671582	0	4243700	0	5439500	754030000	964080000	609030000	0.00562803
60S ribosomal protein L14		RPL14	0	0	0	8731400	338360000	2492900000	2094200000	0	0	0.00416932	0	0	0	77277000	114850000	18565000	16044000	601680000	838260000	516410000	0.190882	0.0221471	0.0310683	0.672852	0.71285	0.116025	59255000	33939000	13958000	7870000	1131900000	729420000	840470000	0.0299841	0.0191358	0.00936381	1.74593	2.04359	0.638197	0	6696000	0	8296000	754030000	964080000	609030000	0.00888028
Protein S100-A10		S100A10	37835000	0	0	0	338360000	2492900000	2094200000	0	0	0	∞	0	0	47777000	58296000	0	0	601680000	838260000	516410000	0.0968887	0	0	0.819559	0	0	23197000	0	0	0	1131900000	729420000	840470000	0	0	0	∞	0	0	0	9788700	0	0	754030000	964080000	609030000	0.0129818
60S ribosomal protein L3		RPL3	0	1409000	10597000	0	338360000	2492900000	2094200000	0.0041642	0.00425087	0	0	∞	1.02081	70750000	95333000	6338700	5948600	601680000	838260000	516410000	0.158445	0.00756174	0.0115191	0.742135	0.65645	0.0477248	40816000	21611000	0	0	1131900000	729420000	840470000	0.0190927	0	0	1.88867	0	0	5920200	10293000	0	0	754030000	964080000	609030000	0.0136507
Erlin-2;Erlin-1		ERLIN2;ERLIN1	0	0	0	0	338360000	2492900000	2094200000	0	0	0	0	0	0	0	0	0	0	601680000	838260000	516410000	0	0	0	0	0	0	6299400	0	0	0	1131900000	729420000	840470000	0	0	0	∞	0	0	4744200	12931000	1891200	11120000	754030000	964080000	609030000	0.0171492
Fructose-bisphosphate aldolase A		ALDOA	0	2939400	12850000	0	338360000	2492900000	2094200000	0.0086872	0.00515464	0	0	∞	0.59336	8510700	8497400	0	0	601680000	838260000	516410000	0.0141228	0	0	1.00157	0	0	10575000	0	0	0	1131900000	729420000	840470000	0	0	0	∞	0	0	0	0	0	0	754030000	964080000	609030000	0
Polypyrimidine tract-binding protein 1		PTBP1	0	0	0	0	338360000	2492900000	2094200000	0	0	0	0	0	0	0	0	0	0	601680000	838260000	516410000	0	0	0	0	0	0	0	0	0	0	1131900000	729420000	840470000	0	0	0	0	0	0	0	0	0	0	754030000	964080000	609030000	0
Filamin-A		FLNA	0	13770000	1924400	6663100	338360000	2492900000	2094200000	0.0406963	0.000771952	0.00318169	0	0.242623	0.0189686	65079000	785030000	0	743260	601680000	838260000	516410000	1.30473	0	0.00143928	0.0829	0	0	24261000	12139000	0	0	1131900000	729420000	840470000	0.0107244	0	0	1.9986	0	0	0	0	0	3766300	754030000	964080000	609030000	0
Mitochondrial 2-oxoglutarate/malate carrier protein		SLC25A11	10404000	0	10653000	0	338360000	2492900000	2094200000	0	0.00427334	0	∞	∞	∞	11871000	0	0	5734300	601680000	838260000	516410000	0	0	0.0111042	∞	0	0	9806500	0	0	0	1131900000	729420000	840470000	0	0	0	∞	0	0	0	3939600	5621800	0	754030000	964080000	609030000	0.00522473
Rab GDP dissociation inhibitor beta		GDI2	0	0	0	0	338360000	2492900000	2094200000	0	0	0	0	0	0	0	0	0	0	601680000	838260000	516410000	0	0	0	0	0	0	0	6560300	0	0	1131900000	729420000	840470000	0.00579583	0	0	0	0	0	0	0	6924000	4518600	754030000	964080000	609030000	0
26S proteasome non-ATPase regulatory subunit 6		PSMD6	13068000	0	0	0	338360000	2492900000	2094200000	0	0	0	∞	0	0	11238000	5907300	0	0	601680000	838260000	516410000	0.00981801	0	0	1.90239	0	0	0	0	0	0	1131900000	729420000	840470000	0	0	0	0	0	0	0	9315700	0	0	754030000	964080000	609030000	0.0123545
Sequestosome-1		SQSTM1	0	0	0	18782000	338360000	2492900000	2094200000	0	0	0.00896858	0	0	0	287350000	235900000	46535000	18885000	601680000	838260000	516410000	0.392069	0.0555138	0.0365698	1.2181	1.51802	0.141592	127940000	59458000	20372000	4983800	1131900000	729420000	840470000	0.0525294	0.027929	0.00592978	2.15177	4.70996	0.531684	0	0	5618700	6503700	754030000	964080000	609030000	0
V-type proton ATPase 16 kDa proteolipid subunit		ATP6V0C	35834000	0	0	0	338360000	2492900000	2094200000	0	0	0	∞	0	0	96644000	94352000	0	12072000	601680000	838260000	516410000	0.156814	0	0.0233768	1.02429	0	0	18359000	0	0	0	1131900000	729420000	840470000	0	0	0	∞	0	0	0	0	8419600	8357100	754030000	964080000	609030000	0
Complement component 1 Q subcomponent-binding protein, mitochondrial		C1QBP	0	0	0	0	338360000	2492900000	2094200000	0	0	0	0	0	0	11570000	7622600	0	0	601680000	838260000	516410000	0.0126689	0	0	1.51785	0	0	0	0	0	0	1131900000	729420000	840470000	0	0	0	0	0	0	3583900	7882400	17208000	29810000	754030000	964080000	609030000	0.0104537
40S ribosomal protein S7		RPS7	6546100	0	0	0	338360000	2492900000	2094200000	0	0	0	∞	0	0	2548700	0	6263100	0	601680000	838260000	516410000	0	0.00747155	0	∞	∞	∞	7330400	4747300	5026600	0	1131900000	729420000	840470000	0.0041941	0.00689123	0	1.54412	∞	1.64308	0	24599000	5992000	3535200	754030000	964080000	609030000	0.0326234
Annexin A1		ANXA1	0	0	0	0	338360000	2492900000	2094200000	0	0	0	0	0	0	0	0	0	0	601680000	838260000	516410000	0	0	0	0	0	0	13237000	0	0	0	1131900000	729420000	840470000	0	0	0	∞	0	0	0	0	0	0	754030000	964080000	609030000	0
Eukaryotic initiation factor 4A-I;Eukaryotic initiation factor 4A-II		EIF4A1;EIF4A2	0	0	0	0	338360000	2492900000	2094200000	0	0	0	0	0	0	0	14163000	0	0	601680000	838260000	516410000	0.0235391	0	0	0	0	0	50570000	20465000	0	0	1131900000	729420000	840470000	0.0180802	0	0	2.47105	0	0	0	0	1806400	1207400	754030000	964080000	609030000	0
Ankycorbin		RAI14	128150000	17821000	0	0	338360000	2492900000	2094200000	0.0526688	0	0	7.19095	0	0	1510600000	1568100000	0	0	601680000	838260000	516410000	2.6062	0	0	0.963331	0	0	532450000	94967000	0	0	1131900000	729420000	840470000	0.0839005	0	0	5.60668	0	0	0	2422300	2618300	0	754030000	964080000	609030000	0.00321247
Elongation factor 1-gamma		EEF1G	0	0	0	10749000	338360000	2492900000	2094200000	0	0	0.00513275	0	0	0	32330000	14721000	0	0	601680000	838260000	516410000	0.0244665	0	0	2.19618	0	0	22162000	6223000	0	0	1131900000	729420000	840470000	0.00549784	0	0	3.5613	0	0	7124000	0	3195800	22926000	754030000	964080000	609030000	0
Alpha-actinin-1		ACTN1	7212800	0	4734500	11498000	338360000	2492900000	2094200000	0	0.00189919	0.0054904	∞	0.345912	∞	341180000	286700000	0	0	601680000	838260000	516410000	0.476499	0	0	1.19002	0	0	76811000	36095000	0	0	1131900000	729420000	840470000	0.0318889	0	0	2.12802	0	0	1952700	0	2771000	0	754030000	964080000	609030000	0
Protein disulfide-isomerase		P4HB	5375100	17010000	39423000	9245700	338360000	2492900000	2094200000	0.0502719	0.0158141	0.00441491	0.315996	3.58198	0.314572	110540000	99358000	18564000	27667000	601680000	838260000	516410000	0.165134	0.0221459	0.0535756	1.11254	0.413357	0.134108	105140000	19900000	7479900	0	1131900000	729420000	840470000	0.0175811	0.0102546	0	5.28342	∞	0.583275	3686400	6250300	0	10158000	754030000	964080000	609030000	0.00828919
Engulfment and cell motility protein 2;Engulfment and cell motility protein 1		ELMO2;ELMO1	0	0	0	0	338360000	2492900000	2094200000	0	0	0	0	0	0	0	0	0	0	601680000	838260000	516410000	0	0	0	0	0	0	0	0	0	0	1131900000	729420000	840470000	0	0	0	0	0	0	6144500	0	5864000	0	754030000	964080000	609030000	0
Tryptophan--tRNA ligase, cytoplasmic;T1-TrpRS;T2-TrpRS		WARS	0	0	0	0	338360000	2492900000	2094200000	0	0	0	0	0	0	20274000	21237000	0	0	601680000	838260000	516410000	0.0352962	0	0	0.954655	0	0	0	0	0	0	1131900000	729420000	840470000	0	0	0	0	0	0	15302000	5097600	8040500	0	754030000	964080000	609030000	0.00676047
Phosphate carrier protein, mitochondrial		SLC25A3	32068000	0	32426000	0	338360000	2492900000	2094200000	0	0.0130073	0	∞	∞	∞	43508000	27383000	11757000	0	601680000	838260000	516410000	0.0455109	0.0140255	0	1.58887	∞	0.308178	25615000	10091000	0	0	1131900000	729420000	840470000	0.0089151	0	0	2.5384	0	0	1370200	10219000	0	19638000	754030000	964080000	609030000	0.0135525
Sterol O-acyltransferase 1		SOAT1	0	0	0	0	338360000	2492900000	2094200000	0	0	0	0	0	0	0	0	0	0	601680000	838260000	516410000	0	0	0	0	0	0	0	0	0	0	1131900000	729420000	840470000	0	0	0	0	0	0	0	0	0	0	754030000	964080000	609030000	0
Guanine nucleotide-binding protein G(i) subunit alpha-2		GNAI2	101580000	35770000	218010000	148580000	338360000	2492900000	2094200000	0.105716	0.0874524	0.0709483	2.83981	1.23262	0.82724	1153900000	715630000	37669000	0	601680000	838260000	516410000	1.18939	0.0449371	0	1.61243	∞	0.0377818	556520000	31369000	9046800	0	1131900000	729420000	840470000	0.0277136	0.0124027	0	17.7411	∞	0.447533	7822100	0	0	0	754030000	964080000	609030000	0
Endoplasmin		HSP90B1	0	749160	1802500	3500200	338360000	2492900000	2094200000	0.00221409	0.000723053	0.00167138	0	0.432609	0.326569	0	7458700	0	0	601680000	838260000	516410000	0.0123965	0	0	0	0	0	35710000	25149000	0	0	1131900000	729420000	840470000	0.0222184	0	0	1.41994	0	0	0	0	0	0	754030000	964080000	609030000	0
Tyrosine-protein kinase Yes;Tyrosine-protein kinase Lyn;Tyrosine-protein kinase HCK;Proto-oncogene tyrosine-protein kinase Src;Tyrosine-protein kinase Fyn		YES1;LYN;HCK;SRC;FYN	0	0	0	0	338360000	2492900000	2094200000	0	0	0	0	0	0	8479200	10278000	0	0	601680000	838260000	516410000	0.0170822	0	0	0.824985	0	0	0	0	0	0	1131900000	729420000	840470000	0	0	0	0	0	0	0	0	16009000	20101000	754030000	964080000	609030000	0
F-actin-capping protein subunit alpha-1		CAPZA1	46629000	0	0	0	338360000	2492900000	2094200000	0	0	0	∞	0	0	183360000	181280000	0	0	601680000	838260000	516410000	0.30129	0	0	1.01147	0	0	84513000	15767000	0	4153000	1131900000	729420000	840470000	0.0139297	0	0.00494128	5.36012	0	0	7467300	7767800	10377000	0	754030000	964080000	609030000	0.0103017
U4/U6 small nuclear ribonucleoprotein Prp31		PRPF31	0	0	0	0	338360000	2492900000	2094200000	0	0	0	0	0	0	0	13183000	0	0	601680000	838260000	516410000	0.0219103	0	0	0	0	0	0	0	0	0	1131900000	729420000	840470000	0	0	0	0	0	0	0	0	0	39525000	754030000	964080000	609030000	0
Plasminogen activator inhibitor 1 RNA-binding protein		SERBP1	0	0	0	1276800	338360000	2492900000	2094200000	0	0	0.000609684	0	0	0	1565700	925250	730050	0	601680000	838260000	516410000	0.00153778	0.000870911	0	1.69219	∞	0.566344	16443000	1659400	3232900	2232200	1131900000	729420000	840470000	0.00146603	0.00443215	0.00265589	9.909	1.6688	3.02323	0	0	0	1661700	754030000	964080000	609030000	0
14-3-3 protein epsilon		YWHAE	0	0	0	0	338360000	2492900000	2094200000	0	0	0	0	0	0	0	0	0	0	601680000	838260000	516410000	0	0	0	0	0	0	0	0	0	0	1131900000	729420000	840470000	0	0	0	0	0	0	0	0	0	0	754030000	964080000	609030000	0
Transcription initiation factor TFIID subunit 4		TAF4	0	0	0	0	338360000	2492900000	2094200000	0	0	0	0	0	0	0	0	0	0	601680000	838260000	516410000	0	0	0	0	0	0	0	0	0	0	1131900000	729420000	840470000	0	0	0	0	0	0	5565200	0	1778000	4217000	754030000	964080000	609030000	0
Vesicle-associated membrane protein-associated protein A;Vesicle-associated membrane protein-associated protein B/C		VAPA;VAPB	0	0	0	0	338360000	2492900000	2094200000	0	0	0	0	0	0	0	0	0	0	601680000	838260000	516410000	0	0	0	0	0	0	0	0	0	0	1131900000	729420000	840470000	0	0	0	0	0	0	0	1811300	972170	1343200	754030000	964080000	609030000	0.00240216
Probable ATP-dependent RNA helicase DDX20		DDX20	0	0	0	0	338360000	2492900000	2094200000	0	0	0	0	0	0	14721000	26005000	0	0	601680000	838260000	516410000	0.0432206	0	0	0.566083	0	0	0	0	0	0	1131900000	729420000	840470000	0	0	0	0	0	0	9131700	1818200	9616700	1592900	754030000	964080000	609030000	0.00241131
Complement C4-B;Complement C4 beta chain;Complement C4-B alpha chain;C4a anaphylatoxin;C4b-B;C4d-B;Complement C4 gamma chain;Complement C4-A;Complement C4 beta chain;Complement C4-A alpha chain;C4a anaphylatoxin;C4b-A;C4d-A;Complement C4 gamma chain		C4B;C4A	0	0	0	0	338360000	2492900000	2094200000	0	0	0	0	0	0	0	0	0	0	601680000	838260000	516410000	0	0	0	0	0	0	0	0	0	0	1131900000	729420000	840470000	0	0	0	0	0	0	3798500	0	3203400	0	754030000	964080000	609030000	0
60S ribosomal protein L8		RPL8	0	3387400	17967000	1418100	338360000	2492900000	2094200000	0.0100112	0.00720727	0.000677156	0	10.6434	0.719918	147470000	37796000	24729000	35159000	601680000	838260000	516410000	0.0628174	0.0295004	0.0680835	3.90174	0.433297	0.469621	136800000	0	0	0	1131900000	729420000	840470000	0	0	0	∞	0	0	4189900	15372000	7068900	9765500	754030000	964080000	609030000	0.0203865
Serine/threonine-protein kinase RIO1		RIOK1	0	0	0	0	338360000	2492900000	2094200000	0	0	0	0	0	0	0	0	0	0	601680000	838260000	516410000	0	0	0	0	0	0	0	8018100	0	0	1131900000	729420000	840470000	0.00708375	0	0	0	0	0	0	0	0	0	754030000	964080000	609030000	0
SCY1-like protein 2		SCYL2	87153000	5587300	214510000	132930000	338360000	2492900000	2094200000	0.0165129	0.0860484	0.0634753	15.5984	1.35562	5.21098	231650000	88475000	205770000	48037000	601680000	838260000	516410000	0.147047	0.245473	0.093021	2.61825	2.63889	1.66935	282940000	126050000	162180000	102200000	1131900000	729420000	840470000	0.111361	0.222341	0.121599	2.24466	1.82848	1.99657	0	0	0	0	754030000	964080000	609030000	0
Transmembrane protein 43		TMEM43	0	0	0	0	338360000	2492900000	2094200000	0	0	0	0	0	0	0	0	0	0	601680000	838260000	516410000	0	0	0	0	0	0	0	0	0	0	1131900000	729420000	840470000	0	0	0	0	0	0	0	0	0	0	754030000	964080000	609030000	0
Drebrin		DBN1	54312000	0	37863000	56612000	338360000	2492900000	2094200000	0	0.0151883	0.0270328	∞	0.561849	∞	890430000	649590000	0	0	601680000	838260000	516410000	1.07963	0	0	1.37076	0	0	405530000	46460000	0	0	1131900000	729420000	840470000	0.041046	0	0	8.72858	0	0	15813000	0	6578700	0	754030000	964080000	609030000	0
60S ribosomal protein L19		RPL19	0	0	0	12933000	338360000	2492900000	2094200000	0	0	0.00617563	0	0	0	73902000	72575000	0	0	601680000	838260000	516410000	0.120621	0	0	1.01828	0	0	39736000	0	0	0	1131900000	729420000	840470000	0	0	0	∞	0	0	3927100	588910	0	0	754030000	964080000	609030000	0.000781017
E3 ubiquitin-protein ligase TRIM21		TRIM21	629000000	45070000	596220000	589920000	338360000	2492900000	2094200000	0.133201	0.239167	0.281692	13.9561	0.849037	1.79553	806850000	504160000	283170000	280120000	601680000	838260000	516410000	0.83792	0.337807	0.542437	1.60038	0.622758	0.403149	773330000	438640000	238990000	240920000	1131900000	729420000	840470000	0.387525	0.327644	0.286649	1.76302	1.14301	0.845477	3133400	0	5656700	5514600	754030000	964080000	609030000	0
Probable ATP-dependent RNA helicase DDX60-like		DDX60L	0	0	0	0	338360000	2492900000	2094200000	0	0	0	0	0	0	0	0	0	0	601680000	838260000	516410000	0	0	0	0	0	0	20919000	0	20586000	0	1131900000	729420000	840470000	0	0.0282224	0	∞	∞	∞	0	0	0	0	754030000	964080000	609030000	0
S-adenosylmethionine synthase isoform type-2		MAT2A	0	0	13576000	18696000	338360000	2492900000	2094200000	0	0.00544587	0.00892751	0	0.610009	∞	11164000	0	0	0	601680000	838260000	516410000	0	0	0	∞	0	0	7476400	0	8383600	7255400	1131900000	729420000	840470000	0	0.0114935	0.00863255	∞	1.33142	∞	2994100	0	0	0	754030000	964080000	609030000	0
26S protease regulatory subunit 8		PSMC5	0	417030	0	0	338360000	2492900000	2094200000	0.0012325	0	0	0	0	0	0	0	0	0	601680000	838260000	516410000	0	0	0	0	0	0	0	0	0	0	1131900000	729420000	840470000	0	0	0	0	0	0	16331000	11255000	6737500	9148700	754030000	964080000	609030000	0.0149265
40S ribosomal protein S27-like;40S ribosomal protein S27		RPS27L;RPS27	0	0	0	17597000	338360000	2492900000	2094200000	0	0	0.00840273	0	0	0	0	17699000	0	0	601680000	838260000	516410000	0.029416	0	0	0	0	0	12314000	12171000	25411000	14843000	1131900000	729420000	840470000	0.0107527	0.0348373	0.0176604	1.01175	1.97263	3.23986	0	0	0	0	754030000	964080000	609030000	0
Lamina-associated polypeptide 2, isoform alpha;Thymopoietin;Thymopentin		TMPO	12858000	2827800	28177000	72802000	338360000	2492900000	2094200000	0.00835737	0.0113029	0.0347636	4.547	0.325136	1.35245	51741000	18232000	15392000	0	601680000	838260000	516410000	0.0303018	0.0183618	0	2.83792	∞	0.605965	48363000	0	36853000	26571000	1131900000	729420000	840470000	0	0.0505237	0.0316145	∞	1.59812	∞	25451000	1945900	1512900	11116000	754030000	964080000	609030000	0.00258067
Polyadenylate-binding protein 1		PABPC1	0	0	0	16845000	338360000	2492900000	2094200000	0	0	0.00804364	0	0	0	67192000	47017000	0	0	601680000	838260000	516410000	0.0781429	0	0	1.4291	0	0	19042000	0	0	0	1131900000	729420000	840470000	0	0	0	∞	0	0	0	0	0	0	754030000	964080000	609030000	0
60S ribosomal protein L29		RPL29	0	0	0	0	338360000	2492900000	2094200000	0	0	0	0	0	0	29475000	76537000	0	9013400	601680000	838260000	516410000	0.127205	0	0.017454	0.385108	0	0	27040000	0	0	19447000	1131900000	729420000	840470000	0	0	0.0231382	∞	0	0	0	36045000	24598000	39937000	754030000	964080000	609030000	0.0478031
RNA-binding protein 10		RBM10	0	2593000	0	22934000	338360000	2492900000	2094200000	0.00766344	0	0.0109512	0	0	0	0	0	0	0	601680000	838260000	516410000	0	0	0	0	0	0	9166600	2266000	1767400	0	1131900000	729420000	840470000	0.00200194	0.00242302	0	4.04528	∞	1.21033	78146000	25927000	3836800	0	754030000	964080000	609030000	0.0343846
Caveolin-2		CAV2	0	0	27659000	26638000	338360000	2492900000	2094200000	0	0.0110951	0.0127199	0	0.872264	∞	0	0	0	0	601680000	838260000	516410000	0	0	0	0	0	0	0	0	0	0	1131900000	729420000	840470000	0	0	0	0	0	0	7138800	19522000	15230000	22082000	754030000	964080000	609030000	0.0258902
Filamin-B		FLNB	799190	1328600	0	0	338360000	2492900000	2094200000	0.00392659	0	0	0.601528	0	0	238370000	1039100000	40118000	40349000	601680000	838260000	516410000	1.727	0.0478587	0.0781337	0.2294	0.612523	0.0277121	58175000	41242000	27888000	15501000	1131900000	729420000	840470000	0.0364361	0.0382331	0.0184433	1.41058	2.07301	1.04932	0	47038000	25743000	5801100	754030000	964080000	609030000	0.0623821
Carbonyl reductase [NADPH] 1;Carbonyl reductase [NADPH] 3		CBR1;CBR3	0	0	0	0	338360000	2492900000	2094200000	0	0	0	0	0	0	0	0	0	0	601680000	838260000	516410000	0	0	0	0	0	0	0	0	0	0	1131900000	729420000	840470000	0	0	0	0	0	0	13802000	6858800	7754100	0	754030000	964080000	609030000	0.00909619
Fibrinogen gamma chain		FGG	184060000	17619000	105270000	96036000	338360000	2492900000	2094200000	0.0520718	0.0422279	0.0458581	10.4467	0.920839	0.810956	28423000	0	28679000	11934000	601680000	838260000	516410000	0	0.0342125	0.0231095	∞	1.48045	∞	72753000	0	14463000	57314000	1131900000	729420000	840470000	0	0.0198281	0.0681928	∞	0.290765	∞	25681000	0	0	19226000	754030000	964080000	609030000	0
14-3-3 protein theta		YWHAQ	20679000	1410700	12698000	12731000	338360000	2492900000	2094200000	0.00416923	0.00509367	0.00607917	14.6587	0.837888	1.22173	166740000	77273000	0	10699000	601680000	838260000	516410000	0.128429	0	0.020718	2.1578	0	0	51150000	5737000	0	0	1131900000	729420000	840470000	0.00506847	0	0	8.91581	0	0	1895200	0	19430000	5791300	754030000	964080000	609030000	0
26S proteasome non-ATPase regulatory subunit 4		PSMD4	49251000	382630	51099000	44762000	338360000	2492900000	2094200000	0.00113084	0.0204978	0.0213743	128.717	0.958995	18.1262	50018000	20681000	106370	3518300	601680000	838260000	516410000	0.0343721	0.000126894	0.006813	2.41855	0.0186253	0.00369177	109260000	67026000	88308000	69418000	1131900000	729420000	840470000	0.0592155	0.121066	0.0825943	1.63011	1.46579	2.0445	19621000	1509800	59207000	2141200	754030000	964080000	609030000	0.00200231
Cofilin-1		CFL1	11508000	3524500	14387000	30639000	338360000	2492900000	2094200000	0.0104164	0.00577119	0.0146304	3.26514	0.394465	0.554047	15329000	47002000	0	0	601680000	838260000	516410000	0.0781179	0	0	0.326135	0	0	34027000	0	9255200	7250200	1131900000	729420000	840470000	0	0.0126884	0.00862636	∞	1.47089	∞	0	0	10084000	9397400	754030000	964080000	609030000	0
Carboxymethylenebutenolidase homolog		CMBL	0	0	0	0	338360000	2492900000	2094200000	0	0	0	0	0	0	0	0	0	0	601680000	838260000	516410000	0	0	0	0	0	0	0	0	0	0	1131900000	729420000	840470000	0	0	0	0	0	0	20003000	10384000	3882000	1054000	754030000	964080000	609030000	0.0137713
Protein-glutamine gamma-glutamyltransferase 2		TGM2	6096000	3258500	33802000	14609000	338360000	2492900000	2094200000	0.00963028	0.0135593	0.00697593	1.8708	1.94373	1.40799	29176000	0	6259100	0	601680000	838260000	516410000	0	0.00746678	0	∞	∞	∞	43615000	0	12460000	0	1131900000	729420000	840470000	0	0.0170821	0	∞	∞	∞	37010000	11101000	34386000	26883000	754030000	964080000	609030000	0.0147222
Heat shock protein HSP 90-alpha		HSP90AA1	30289000	6150200	62456000	44718000	338360000	2492900000	2094200000	0.0181765	0.0250536	0.0213533	4.92488	1.17329	1.37835	104830000	151860000	36777000	17887000	601680000	838260000	516410000	0.252393	0.043873	0.0346372	0.690307	1.26664	0.173828	266250000	58910000	0	17612000	1131900000	729420000	840470000	0.0520452	0	0.0209549	4.51961	0	0	44905000	28809000	57527000	26697000	754030000	964080000	609030000	0.0382067
Uncharacterized protein C11orf84		C11orf84	0	0	5007000	7365100	338360000	2492900000	2094200000	0	0.0020085	0.0035169	0	0.5711	∞	49561000	26759000	19981000	0	601680000	838260000	516410000	0.0444738	0.0238363	0	1.85212	∞	0.535962	18816000	14638000	38455000	6192500	1131900000	729420000	840470000	0.0129322	0.05272	0.0073679	1.28542	7.15536	4.07663	583170000	36367000	33204000	42549000	754030000	964080000	609030000	0.0482302
Clathrin heavy chain 1		CLTC	25931000	53433000	21075000	10623000	338360000	2492900000	2094200000	0.157918	0.00845401	0.00507258	0.485299	1.66661	0.0535343	4957100000	2515600000	10114000	4467900	601680000	838260000	516410000	4.18096	0.0120655	0.00865185	1.97054	1.39455	0.00288581	2077500000	123150000	0	6720400	1131900000	729420000	840470000	0.108799	0	0.007996	16.8697	0	0	4773400	16387000	5933400	15406000	754030000	964080000	609030000	0.0217326
Pyruvate kinase PKM		PKM	5219300	962790	40868000	33497000	338360000	2492900000	2094200000	0.00284546	0.0163938	0.0159951	5.42102	1.02492	5.76137	37603000	25714000	13253000	6401700	601680000	838260000	516410000	0.042737	0.0158101	0.0123965	1.46236	1.27537	0.36994	120950000	14603000	22670000	14409000	1131900000	729420000	840470000	0.0129013	0.0310795	0.017144	8.28254	1.81285	2.40902	20937000	21862000	22836000	35674000	754030000	964080000	609030000	0.0289935
Ankyrin repeat and FYVE domain-containing protein 1		ANKFY1	0	0	0	0	338360000	2492900000	2094200000	0	0	0	0	0	0	0	82097000	0	0	601680000	838260000	516410000	0.136446	0	0	0	0	0	0	0	0	0	1131900000	729420000	840470000	0	0	0	0	0	0	22678000	40020000	52115000	7059500	754030000	964080000	609030000	0.0530748
Heat shock 70 kDa protein 6;Putative heat shock 70 kDa protein 7		HSPA6;HSPA7	173550000	4071800	265090000	0	338360000	2492900000	2094200000	0.0120339	0.106338	0	42.6224	∞	8.83652	116460000	78926000	58315000	81284000	601680000	838260000	516410000	0.131176	0.0695667	0.157402	1.47556	0.441968	0.530331	281890000	9689700	0	12686000	1131900000	729420000	840470000	0.00856056	0	0.0150939	29.0917	0	0	55052000	25558000	34190000	31626000	754030000	964080000	609030000	0.0338952
26S protease regulatory subunit 6B		PSMC4	0	0	13290000	19705000	338360000	2492900000	2094200000	0	0.00533114	0.00940932	0	0.566581	∞	26370000	5952500	4801900	0	601680000	838260000	516410000	0.00989313	0.00572841	0	4.43007	∞	0.579029	16929000	2684500	0	5680600	1131900000	729420000	840470000	0.00237168	0	0.00675884	6.3062	0	0	95969000	65092000	44139000	71055000	754030000	964080000	609030000	0.0863255
Heterogeneous nuclear ribonucleoprotein K		HNRNPK	48172000	2063200	33549000	13134000	338360000	2492900000	2094200000	0.00609765	0.0134578	0.00627161	23.3482	2.14583	2.20705	25404000	38528000	0	0	601680000	838260000	516410000	0.064034	0	0	0.659365	0	0	64207000	43980000	18552000	5164700	1131900000	729420000	840470000	0.038855	0.0254339	0.00614501	1.45991	4.13895	0.654585	139720000	71605000	46154000	80362000	754030000	964080000	609030000	0.0949631
60S ribosomal protein L38		RPL38	12522000	3970100	101440000	104250000	338360000	2492900000	2094200000	0.0117334	0.0406916	0.0497803	3.15408	0.817422	3.46802	84837000	68260000	74659000	0	601680000	838260000	516410000	0.113449	0.0890643	0	1.24285	∞	0.78506	40149000	15764000	10639000	91331000	1131900000	729420000	840470000	0.013927	0.0145856	0.108667	2.54688	0.134223	1.04728	4137600	14899000	19002000	0	754030000	964080000	609030000	0.0197592
Actin-related protein 2/3 complex subunit 4		ARPC4	116730000	8107900	35275000	30008000	338360000	2492900000	2094200000	0.0239623	0.0141502	0.0143291	14.3971	0.987514	0.590518	0	0	0	0	601680000	838260000	516410000	0	0	0	0	0	0	0	0	0	0	1131900000	729420000	840470000	0	0	0	0	0	0	17489000	102510000	48208000	101940000	754030000	964080000	609030000	0.135949
Small nuclear ribonucleoprotein Sm D2		SNRPD2	6386500	26570000	33550000	33336000	338360000	2492900000	2094200000	0.0785258	0.0134582	0.0159183	0.240365	0.845459	0.171386	8657400	10877000	26809000	48484000	601680000	838260000	516410000	0.0180777	0.0319817	0.0938866	0.795936	0.340642	1.76912	136130000	27442000	41876000	27874000	1131900000	729420000	840470000	0.0242442	0.05741	0.0331648	4.96064	1.73105	2.36799	23452000	87639000	78291000	105430000	754030000	964080000	609030000	0.116227
Annexin A2;Putative annexin A2-like protein		ANXA2;ANXA2P2	495530000	104120000	214280000	227790000	338360000	2492900000	2094200000	0.30772	0.0859561	0.108772	4.75922	0.790242	0.279333	2325600000	1901000000	56436000	61586000	601680000	838260000	516410000	3.15949	0.0673252	0.119258	1.22336	0.564534	0.0213089	1291300000	418150000	56752000	57957000	1131900000	729420000	840470000	0.369423	0.0778043	0.0689578	3.08813	1.12829	0.21061	62147000	138950000	83841000	75646000	754030000	964080000	609030000	0.184276
C-Myc-binding protein		MYCBP	44349000	15473000	97225000	91676000	338360000	2492900000	2094200000	0.0457294	0.0390008	0.0437761	2.86622	0.890914	0.85286	30673000	75562000	13192000	22987000	601680000	838260000	516410000	0.125585	0.0157374	0.0445131	0.405932	0.353545	0.125312	52339000	38001000	22552000	27442000	1131900000	729420000	840470000	0.0335728	0.0309177	0.0326508	1.37731	0.946921	0.920917	76235000	68188000	60350000	81982000	754030000	964080000	609030000	0.0904314
Tyrosine-protein kinase JAK1		JAK1	25354000	0	48044000	41575000	338360000	2492900000	2094200000	0	0.0192723	0.0198524	∞	0.970779	∞	34455000	20988000	0	5313900	601680000	838260000	516410000	0.0348823	0	0.0102901	1.64165	0	0	43021000	11397000	5423000	0	1131900000	729420000	840470000	0.0100689	0.00743467	0	3.77477	∞	0.738379	263330000	160010000	129190000	141040000	754030000	964080000	609030000	0.212206
Tubulin beta chain;Tubulin beta-2B chain;Tubulin beta-2A chain		TUBB;TUBB2B;TUBB2A	198170000	13916000	182840000	129660000	338360000	2492900000	2094200000	0.0411278	0.0733443	0.0619139	14.2404	1.18462	1.78333	366290000	259290000	33857000	37276000	601680000	838260000	516410000	0.430943	0.0403896	0.072183	1.41267	0.559545	0.0937237	309160000	135500000	46650000	19865000	1131900000	729420000	840470000	0.11971	0.0639549	0.0236356	2.28162	2.70587	0.534248	313980000	138330000	258760000	219860000	754030000	964080000	609030000	0.183454
14-3-3 protein zeta/delta		YWHAZ	6580200	2707100	16501000	18277000	338360000	2492900000	2094200000	0.00800065	0.0066192	0.00872744	2.43072	0.758435	0.827333	62838000	70574000	11611000	14527000	601680000	838260000	516410000	0.117295	0.0138513	0.0281307	0.890385	0.49239	0.11809	101460000	10500000	15862000	12408000	1131900000	729420000	840470000	0.00927644	0.021746	0.0147632	9.66286	1.47299	2.34422	383410000	282790000	205750000	278620000	754030000	964080000	609030000	0.375038
Heterogeneous nuclear ribonucleoprotein H;Heterogeneous nuclear ribonucleoprotein H, N-terminally processed		HNRNPH1	88309000	25534000	145420000	152330000	338360000	2492900000	2094200000	0.075464	0.0583337	0.072739	3.45849	0.801959	0.773	176510000	98152000	121240000	65956000	601680000	838260000	516410000	0.16313	0.144633	0.12772	1.79833	1.13242	0.886612	99680000	41439000	0	18256000	1131900000	729420000	840470000	0.0366101	0	0.0217212	2.40546	0	0	607970000	245650000	216610000	215740000	754030000	964080000	609030000	0.325783
OTU domain-containing protein 4		OTUD4	10499000	683090	55830000	22273000	338360000	2492900000	2094200000	0.00201883	0.0223956	0.0106356	15.3699	2.10573	11.0934	28224000	14858000	12225000	8752800	601680000	838260000	516410000	0.0246942	0.0145838	0.0169493	1.89958	0.860434	0.590575	131830000	0	3660300	19848000	1131900000	729420000	840470000	0	0.0050181	0.0236154	∞	0.212493	∞	602210000	196190000	176220000	274260000	754030000	964080000	609030000	0.260189
Major vault protein		MVP	26314000	8413600	35440000	0	338360000	2492900000	2094200000	0.0248658	0.0142164	0	3.12756	∞	0.571723	158420000	204920000	0	22168000	601680000	838260000	516410000	0.34058	0	0.0429271	0.773082	0	0	157310000	62201000	0	20496000	1131900000	729420000	840470000	0.0549527	0	0.0243864	2.52906	0	0	869530000	322830000	153390000	205290000	754030000	964080000	609030000	0.428139
SUN domain-containing protein 2		SUN2	272590000	74803000	121690000	71937000	338360000	2492900000	2094200000	0.221075	0.0488146	0.0343506	3.64411	1.42107	0.220806	591310000	314260000	21868000	24449000	601680000	838260000	516410000	0.522304	0.0260874	0.0473442	1.88159	0.551016	0.0499467	321090000	107710000	27776000	22553000	1131900000	729420000	840470000	0.0951586	0.0380796	0.0268338	2.98106	1.41909	0.40017	1200700000	791840000	503980000	545270000	754030000	964080000	609030000	1.05014
Caveolin-1		CAV1	119340000	16507000	784730000	1057100000	338360000	2492900000	2094200000	0.0487853	0.314786	0.504775	7.22966	0.623616	6.45247	163010000	137730000	126020000	91086000	601680000	838260000	516410000	0.228909	0.150335	0.176383	1.18355	0.852322	0.656746	182420000	148510000	74138000	123330000	1131900000	729420000	840470000	0.131204	0.10164	0.146739	1.22833	0.692655	0.774668	343760000	2232200000	815770000	1849500000	754030000	964080000	609030000	2.96036
[truncated: 19 more columns]

## Sheet: S3E. Nuclear Assoc Pr Hits
Table S3E. The 2 nuclear associated protein hit proteins from MDA-MB-231 cells
Enriched proteins from Table S3D showing nuclear localization (see column E).
The number of trials where each protein shows a ratio of wild type to mutant and a ratio of mutant to mutant + SAHA between 0.56 and 1.8, with also higher intensity in wild type compared to the no protein control, is shown in column D
The color coding of each row corresponds to the number of trials where that protein was enriched: 2 trials (grey higlight)
Protein names	Gene names	Protein ID	SUM =3	Location
6-phosphofructo-2-kinase/fructose-2,6-bisphosphatase 2;6-phosphofructo-2-kinase;Fructose-2,6-bisphosphatase	PFKFB2	O60825	2	N/C
Glutathione S-transferase P	GSTP1	P09211	2	N/C/M
